# Supplementary material for: The epigenetic landscape of Alu repeats delineates the structural and functional genomic architecture of colon cancer cells
Source: PubMed Central journal article supplement — Genome Res. 2017 Jan;27(1):118–32. doi: 10.1101/gr.207522.116 (PMC5204336; doi:10.1101/gr.207522.116), 2017-01
Supplement: supp_gr.207522.116_Supplemental_Data_S5.pdf [file supp_gr.207522.116_Supplemental_Data_S5.pdf]

Mireia Jordà et al. *The epigenetic landscape of Alu repeats delineates the structural and functional genomic architecture of colon cancer cells.*

**Supplemental Data S5.** UCSC Genome Browser tracks (bed files) displaying differential methylation values and hypomethylated regions (assembly: Feb. 2009 GRCh37/hg19)

|                                                     |                                                                                                                                                                                                                                                                                                           |
|-----------------------------------------------------|-----------------------------------------------------------------------------------------------------------------------------------------------------------------------------------------------------------------------------------------------------------------------------------------------------------|
| <b>Uploading all tracks to UCSC Genome browser:</b> | <a href="http://genome.ucsc.edu/cgi-bin/hgTracks?hgS_doOtherUser=submit&amp;hgS_otherUserName=mapeix&amp;hgS_otherUserSessionName=NSUMA%20ALL%20TRACKS">http://genome.ucsc.edu/cgi-bin/hgTracks?hgS_doOtherUser=submit&amp;hgS_otherUserName=mapeix&amp;hgS_otherUserSessionName=NSUMA%20ALL%20TRACKS</a> |
|-----------------------------------------------------|-----------------------------------------------------------------------------------------------------------------------------------------------------------------------------------------------------------------------------------------------------------------------------------------------------------|

| Description                    | Samples           | URL                                                                                                                                                                                                     |
|--------------------------------|-------------------|---------------------------------------------------------------------------------------------------------------------------------------------------------------------------------------------------------|
| NSUMA HMARs                    | CaCo2 wt          | <a href="http://gattaca.imppc.org/genome_browser/maplab/nsuma_colon/ddNSUMAHiSeqCaCo2wt.bed.bz2">http://gattaca.imppc.org/genome_browser/maplab/nsuma_colon/ddNSUMAHiSeqCaCo2wt.bed.bz2</a>             |
| NSUMA Alu DMR                  | CaCo2 wt          | <a href="http://gattaca.imppc.org/genome_browser/maplab/nsuma_colon/ddNSUMAHiSeqCaCo2wtpoints.bed.bz2">http://gattaca.imppc.org/genome_browser/maplab/nsuma_colon/ddNSUMAHiSeqCaCo2wtpoints.bed.bz2</a> |
| NSUMA HMARs                    | HT29              | <a href="http://gattaca.imppc.org/genome_browser/maplab/nsuma_colon/ddNSUMAHiSeqHT29.bed.bz2">http://gattaca.imppc.org/genome_browser/maplab/nsuma_colon/ddNSUMAHiSeqHT29.bed.bz2</a>                   |
| NSUMA Alu DMR                  | HT29              | <a href="http://gattaca.imppc.org/genome_browser/maplab/nsuma_colon/ddNSUMAHiSeqHT29points.bed.bz2">http://gattaca.imppc.org/genome_browser/maplab/nsuma_colon/ddNSUMAHiSeqHT29points.bed.bz2</a>       |
| NSUMA HMARs                    | LoVo              | <a href="http://gattaca.imppc.org/genome_browser/maplab/nsuma_colon/ddNSUMAHiSeqLoVo.bed.bz2">http://gattaca.imppc.org/genome_browser/maplab/nsuma_colon/ddNSUMAHiSeqLoVo.bed.bz2</a>                   |
| NSUMA Alu DMR                  | LoVo              | <a href="http://gattaca.imppc.org/genome_browser/maplab/nsuma_colon/ddNSUMAHiSeqLoVopoints.bed.bz2">http://gattaca.imppc.org/genome_browser/maplab/nsuma_colon/ddNSUMAHiSeqLoVopoints.bed.bz2</a>       |
| NSUMA HMARs                    | SW480-r2          | <a href="http://gattaca.imppc.org/genome_browser/maplab/nsuma_colon/ddNSUMAHiSeqSw480t2.bed.bz2">http://gattaca.imppc.org/genome_browser/maplab/nsuma_colon/ddNSUMAHiSeqSw480t2.bed.bz2</a>             |
| NSUMA Alu DMR                  | SW480-r2          | <a href="http://gattaca.imppc.org/genome_browser/maplab/nsuma_colon/ddNSUMAHiSeqSw480t2points.bed.bz2">http://gattaca.imppc.org/genome_browser/maplab/nsuma_colon/ddNSUMAHiSeqSw480t2points.bed.bz2</a> |
| NSUMA HMARs                    | HCT116            | <a href="http://gattaca.imppc.org/genome_browser/maplab/nsuma_colon/ddNSUMAHCT.bed.bz2">http://gattaca.imppc.org/genome_browser/maplab/nsuma_colon/ddNSUMAHCT.bed.bz2</a>                               |
| NSUMA Alu DMR                  | HCT116            | <a href="http://gattaca.imppc.org/genome_browser/maplab/nsuma_colon/ddNSUMAHCTpoints.bed.bz2">http://gattaca.imppc.org/genome_browser/maplab/nsuma_colon/ddNSUMAHCTpoints.bed.bz2</a>                   |
| NSUMA Alu DMR                  | 369 Blood/NColon  | <a href="http://gattaca.imppc.org/genome_browser/maplab/nsuma_colon/ddNSUMA369BNpoints.bed.bz2">http://gattaca.imppc.org/genome_browser/maplab/nsuma_colon/ddNSUMA369BNpoints.bed.bz2</a>               |
| NSUMA Alu DMR                  | 544 Blood/NColon  | <a href="http://gattaca.imppc.org/genome_browser/maplab/nsuma_colon/ddNSUMA544BNpoints.bed.bz2">http://gattaca.imppc.org/genome_browser/maplab/nsuma_colon/ddNSUMA544BNpoints.bed.bz2</a>               |
| NSUMA Alu DMR                  | 557 Blood/NColon  | <a href="http://gattaca.imppc.org/genome_browser/maplab/nsuma_colon/ddNSUMA557BNpoints.bed.bz2">http://gattaca.imppc.org/genome_browser/maplab/nsuma_colon/ddNSUMA557BNpoints.bed.bz2</a>               |
| NSUMA Alu DMR                  | Mean Blood/NColon | <a href="http://gattaca.imppc.org/genome_browser/maplab/nsuma_colon/ddNSUMAmBmNpoints.bed.bz2">http://gattaca.imppc.org/genome_browser/maplab/nsuma_colon/ddNSUMAmBmNpoints.bed.bz2</a>                 |
| NSUMA Alu DMR                  | 369 NColon/Tumor  | <a href="http://gattaca.imppc.org/genome_browser/maplab/nsuma_colon/ddNSUMA369Tpoints.bed.bz2">http://gattaca.imppc.org/genome_browser/maplab/nsuma_colon/ddNSUMA369Tpoints.bed.bz2</a>                 |
| NSUMA Alu DMR                  | 544 NColon/Tumor  | <a href="http://gattaca.imppc.org/genome_browser/maplab/nsuma_colon/ddNSUMA544Tpoints.bed.bz2">http://gattaca.imppc.org/genome_browser/maplab/nsuma_colon/ddNSUMA544Tpoints.bed.bz2</a>                 |
| NSUMA Alu DMR                  | 557 NColon/Tumor  | <a href="http://gattaca.imppc.org/genome_browser/maplab/nsuma_colon/ddNSUMA557Tpoints.bed.bz2">http://gattaca.imppc.org/genome_browser/maplab/nsuma_colon/ddNSUMA557Tpoints.bed.bz2</a>                 |
| NSUMA HMAR                     | Mean NColon/Tumor | <a href="http://gattaca.imppc.org/genome_browser/maplab/nsuma_colon/ddNSUMAT.bed.bz2">http://gattaca.imppc.org/genome_browser/maplab/nsuma_colon/ddNSUMAT.bed.bz2</a>                                   |
| NSUMA Alu DMR                  | Mean NColon/Tumor | <a href="http://gattaca.imppc.org/genome_browser/maplab/nsuma_colon/ddNSUMATpoints.bed.bz2">http://gattaca.imppc.org/genome_browser/maplab/nsuma_colon/ddNSUMATpoints.bed.bz2</a>                       |
| WGBS HMAR                      | Mean NColon-Tumor | <a href="http://gattaca.imppc.org/genome_browser/maplab/nsuma_colon/ddHANSENAlus.bed.bz2">http://gattaca.imppc.org/genome_browser/maplab/nsuma_colon/ddHANSENAlus.bed.bz2</a>                           |
| WGBS Alu DM                    | Mean NColon-Tumor | <a href="http://gattaca.imppc.org/genome_browser/maplab/nsuma_colon/ddHANSENAluspoints.bed.bz2">http://gattaca.imppc.org/genome_browser/maplab/nsuma_colon/ddHANSENAluspoints.bed.bz2</a>               |
| WGBS LINE HMR                  | Mean NColon-Tumor | <a href="http://gattaca.imppc.org/genome_browser/maplab/nsuma_colon/ddHANSENLines.bed.bz2">http://gattaca.imppc.org/genome_browser/maplab/nsuma_colon/ddHANSENLines.bed.bz2</a>                         |
| WGBS LINE DM                   | Mean NColon-Tumor | <a href="http://gattaca.imppc.org/genome_browser/maplab/nsuma_colon/ddHANSENLinespoints.bed.bz2">http://gattaca.imppc.org/genome_browser/maplab/nsuma_colon/ddHANSENLinespoints.bed.bz2</a>             |
| WGBS NoANoL HMR                | Mean NColon-Tumor | <a href="http://gattaca.imppc.org/genome_browser/maplab/nsuma_colon/ddHANSENNoANoL.bed.bz2">http://gattaca.imppc.org/genome_browser/maplab/nsuma_colon/ddHANSENNoANoL.bed.bz2</a>                       |
| WGBS NoANoL DM                 | Mean NColon-Tumor | <a href="http://gattaca.imppc.org/genome_browser/maplab/nsuma_colon/ddHANSENNoANoLpoints.bed.bz2">http://gattaca.imppc.org/genome_browser/maplab/nsuma_colon/ddHANSENNoANoLpoints.bed.bz2</a>           |
| Alu density (per 100Kb)        |                   | <a href="http://gattaca.imppc.org/genome_browser/maplab/nsuma_colon/mmalus.txt.bz2">http://gattaca.imppc.org/genome_browser/maplab/nsuma_colon/mmalus.txt.bz2</a>                                       |
| Gene density (per 100Kb)       |                   | <a href="http://gattaca.imppc.org/genome_browser/maplab/nsuma_colon/mmencoding.txt.bz2">http://gattaca.imppc.org/genome_browser/maplab/nsuma_colon/mmencoding.txt.bz2</a>                               |
| CpG island density (per 100Kb) |                   | <a href="http://gattaca.imppc.org/genome_browser/maplab/nsuma_colon/mmilles.txt.bz2">http://gattaca.imppc.org/genome_browser/maplab/nsuma_colon/mmilles.txt.bz2</a>                                     |
