# Supplementary material for: The epigenetic landscape of Alu repeats delineates the structural and functional genomic architecture of colon cancer cells
Source: HighWire-hosted journal article supplement (doi:10.1101/gr.207522.116), 2016-12-20
Supplement: Supplemental_Data_S1.xlsx [file Supplemental_Data_S1.xlsx]

## Sheet: Description
Supplemental Data S1. NSUMA canonical amplicons
Mireia Jordà et al.
Fields	Description
ampID	NSUMA canonical amplicon ID
chrom	chromosome
chromStart	position start
chromEnd	position end
amplicon_size	size of the amplicon (excluding adaptors and primers)
amplicon_type	NSUMA flanking sites
smaI ID	SmaI site ID
smaI_position	position of the amplicon SmaI site in the gneome
elemID	ID of genomic element associated to the SmaI site
genomic_element_type	type of genomic element (repeat, CpG island, CpG island shore, ...)
genomic_element_class	class of genomic element
repeat_class	Class of repeat (LINE, SINE, MIR, etc)
Alu_family	Alu family

## Sheet: NSUMA amplicons
ampID	chrom	chromStart	chromEnd	amplicon_size	amplicon_type	smaI ID	smaI_position	elemID	genomic_element_type	genomic_element_class	repeat_class	Alu_family
18	1	60250	60282	33	SmaI[TT]-MseI	12	60249	NA	NULL	Unique	NULL	NULL
90	1	532834	533049	216	SmaI[TT]-MseI	50	532833	212	repeat	Alu	SINE	AluSx1
102	1	548432	548707	276	MseI-[AA]SmaI	58	548707	217	repeat	Alu	SINE	AluSq2
105	1	553796	554017	222	SmaI[TT]-MseI	59	553795	220	repeat	Alu	SINE	AluSg4
115	1	647699	647916	218	SmaI[TT]-MseI	64	647698	254	repeat	Alu	SINE	AluY
132	1	710762	711147	386	MseI-[AA]SmaI	73	711147	331	repeat	Alu	SINE	AluSx
135	1	713050	713269	220	SmaI[TT]-MseI	74	713049	336	repeat	Alu	SINE	AluSx
141	1	714699	714925	227	MseI-[AA]SmaI	78	714925	341	repeat	Alu	SINE	AluSg7
144	1	733965	734320	356	MseI-[AA]SmaI	80	734320	353	repeat	Alu	SINE	AluSx1
155	1	788436	788687	252	SmaI[TT]-MseI	85	788435	365	repeat	Alu	SINE	AluSz
165	1	818435	818753	319	SmaI[TT]-MseI	90	818434	370	repeat	Alu	SINE	AluSp
171	1	827268	827491	224	SmaI[TT]-MseI	93	827267	374	repeat	Alu	SINE	AluSp
173	1	830684	830922	239	SmaI[TT]-MseI	94	830683	380	repeat	Alu	SINE	AluYk4
175	1	834500	835047	548	SmaI[TT]-MseI	95	834499	381	repeat	Alu	SINE	AluY
178	1	837868	838078	211	MseI-[AA]SmaI	97	838078	383	repeat	Alu	SINE	AluSq2
239	1	854537	855210	674	MseI-[AA]SmaI	145	855210	5232286	shore	Unique	NULL	NULL
251	1	860664	860882	219	SmaI[TT]-MseI	153	860663	5232287	island	CpGi	NULL	NULL
265	1	867490	868217	728	MseI-[AA]SmaI	165	868217	5232291	shore	Unique	NULL	NULL
280	1	877079	877344	266	SmaI[TT]-MseI	174	877078	5232293	island	CpGi	NULL	NULL
294	1	893542	894175	634	SmaI[TT]-MseI	184	893541	395	repeat	Alu	SINE	AluSx
388	1	920356	920565	210	SmaI[TT]-MseI	269	920355	400	repeat	Alu	SINE	AluSz
392	1	921563	921903	341	SmaI[TT]-MseI	271	921562	401	repeat	Alu	SINE	AluY
394	1	923133	923351	219	SmaI[TT]-MseI	272	923132	405	repeat	Alu	SINE	AluSx1
398	1	927633	927860	228	SmaI[TT]-MseI	274	927632	412	repeat	Alu	SINE	AluSx
399	1	930110	930656	547	MseI-[AA]SmaI	275	930656	418	repeat	Alu	SINE	AluSx1
417	1	937878	938004	127	SmaI[TT]-MseI	288	937877	421	repeat	Alu	SINE	AluSx3
422	1	942541	942893	353	MseI-[AA]SmaI	291	942893	423	repeat	Alu	SINE	AluSq
424	1	943236	943581	346	SmaI[TT]-MseI	292	943235	424	repeat	Alu	SINE	AluYa5
426	1	944301	944579	279	SmaI[TT]-MseI	293	944300	426	repeat	Alu	SINE	AluJb
428	1	945258	945855	598	SmaI[TT]-MseI	294	945257	428	repeat	Alu	SINE	AluJb
489	1	992844	993392	549	MseI-[AA]SmaI	346	993392	448	repeat	Alu	SINE	AluSx1
496	1	995568	996345	778	SmaI[TT]-MseI	351	995567	449	repeat	Alu	SINE	AluSg
498	1	996448	996661	214	SmaI[TT]-MseI	352	996447	450	repeat	Alu	SINE	AluSq
544	1	1032580	1032960	381	SmaI[TT]-MseI	387	1032579	458	repeat	Alu	SINE	AluSx1
550	1	1047517	1048500	984	MseI-[AA]SmaI	391	1048500	475	repeat	Alu	SINE	AluSx1
573	1	1055922	1056208	287	MseI-[AA]SmaI	407	1056208	483	repeat	Alu	SINE	AluSx
580	1	1059912	1060250	339	SmaI[TT]-MseI	411	1059911	NA	NULL	Unique	NULL	NULL
636	1	1094409	1094631	223	MseI-[AA]SmaI	449	1094631	496	repeat	Alu	SINE	AluSx
666	1	1110167	1110197	31	SmaI[TT]-MseI	471	1110166	5232400	shore	Unique	NULL	NULL
680	1	1122320	1122934	615	SmaI[TT]-[AA]SmaI	481	1122319	505	repeat	Alu	SINE	AluY
687	1	1125901	1126051	151	SmaI[TT]-MseI	486	1125900	510	repeat	Alu	SINE	AluSx3
689	1	1126299	1126510	212	SmaI[TT]-MseI	487	1126298	511	repeat	Alu	SINE	AluSq2
709	1	1144912	1145410	499	MseI-[AA]SmaI	503	1145410	522	repeat	Alu	SINE	AluSx1
773	1	1197331	1197609	279	SmaI[TT]-MseI	551	1197330	543	repeat	Alu	SINE	AluSp
777	1	1201101	1201327	227	SmaI[TT]-MseI	553	1201100	547	repeat	Alu	SINE	AluSc
781	1	1203377	1204353	977	MseI-[AA]SmaI	556	1204353	5232457	shore	Unique	NULL	NULL
795	1	1214876	1215093	218	SmaI[TT]-MseI	566	1214875	561	repeat	Alu	SINE	AluY
796	1	1215413	1215768	356	MseI-[AA]SmaI	567	1215768	563	repeat	Alu	SINE	AluYf4
833	1	1251712	1251890	179	MseI-[AA]SmaI	595	1251890	571	repeat	Alu	SINE	AluSq2
835	1	1252016	1252228	213	MseI-[AA]SmaI	596	1252228	572	repeat	Alu	SINE	AluSx
837	1	1253737	1253962	226	MseI-[AA]SmaI	597	1253962	576	repeat	Alu	SINE	AluJb
896	1	1292894	1293114	221	MseI-[AA]SmaI	642	1293114	579	repeat	Alu	SINE	AluSq2
900	1	1297862	1298085	224	MseI-[AA]SmaI	645	1298085	580	repeat	Alu	SINE	AluSx1
902	1	1299374	1299716	343	SmaI[TT]-MseI	646	1299373	586	repeat	Alu	SINE	AluSg
904	1	1304630	1304846	217	SmaI[TT]-MseI	647	1304629	599	repeat	Alu	SINE	AluY
915	1	1313660	1313998	339	SmaI[TT]-MseI	655	1313659	608	repeat	Alu	SINE	AluSx
919	1	1320589	1321096	508	SmaI[TT]-MseI	657	1320588	621	repeat	Alu	SINE	AluSc5
922	1	1323466	1324379	914	MseI-[AA]SmaI	659	1324379	629	repeat	Alu	SINE	AluSq2
929	1	1332222	1332440	219	SmaI[TT]-MseI	663	1332221	641	repeat	Alu	SINE	AluY
935	1	1338067	1338433	367	MseI-[AA]SmaI	667	1338433	646	repeat	Alu	SINE	AluY
939	1	1341436	1341655	220	MseI-[AA]SmaI	669	1341655	656	repeat	Alu	SINE	AluSz
947	1	1344388	1344454	67	MseI-[AA]SmaI	675	1344454	660	repeat	Alu	SINE	AluSp
949	1	1344532	1344732	201	MseI-[AA]SmaI	676	1344732	661	repeat	Alu	SINE	AluSx1
953	1	1352137	1352356	220	MseI-[AA]SmaI	678	1352356	665	repeat	Alu	SINE	AluY
962	1	1358024	1358648	625	SmaI[TT]-MseI	683	1358023	3251003	repeat	ERV	LTR	LTR75
964	1	1359255	1359349	95	SmaI[TT]-MseI	684	1359254	667	repeat	Alu	SINE	AluSx
990	1	1383199	1383423	225	MseI-[AA]SmaI	704	1383423	690	repeat	Alu	SINE	AluY
993	1	1386514	1386728	215	SmaI[TT]-MseI	705	1386513	694	repeat	Alu	SINE	AluY
1000	1	1388676	1389335	660	SmaI[TT]-MseI	709	1388675	697	repeat	Alu	SINE	AluSx
1014	1	1400969	1401857	889	MseI-[AA]SmaI	718	1401857	715	repeat	Alu	SINE	AluY
1040	1	1418299	1418599	301	MseI-[AA]SmaI	735	1418599	736	repeat	Alu	SINE	AluSc8
1051	1	1425035	1425242	208	MseI-[AA]SmaI	742	1425242	NA	NULL	Unique	NULL	NULL
1056	1	1428027	1428243	217	MseI-[AA]SmaI	745	1428243	751	repeat	Alu	SINE	AluSx3
1067	1	1434445	1434835	391	SmaI[TT]-MseI	752	1434444	762	repeat	Alu	SINE	AluY
1069	1	1435371	1435636	266	SmaI[TT]-MseI	753	1435370	765	repeat	Alu	SINE	AluSx
1070	1	1435963	1436261	299	MseI-[AA]SmaI	754	1436261	767	repeat	Alu	SINE	AluY
1073	1	1436728	1437195	468	SmaI[TT]-MseI	755	1436727	769	repeat	Alu	SINE	AluY
1076	1	1437985	1438267	283	SmaI[TT]-MseI	757	1437984	773	repeat	Alu	SINE	AluSx
1104	1	1456302	1456603	302	MseI-[AA]SmaI	776	1456603	792	repeat	Alu	SINE	AluY
1115	1	1463433	1463514	82	SmaI[TT]-MseI	782	1463432	798	repeat	Alu	SINE	AluSq2
1119	1	1465911	1466133	223	MseI-[AA]SmaI	785	1466133	800	repeat	Alu	SINE	AluYa5
1121	1	1466537	1466755	219	MseI-[AA]SmaI	786	1466755	802	repeat	Alu	SINE	AluSc
1156	1	1488772	1489095	324	MseI-[AA]SmaI	812	1489095	820	repeat	Alu	SINE	AluY
1160	1	1492495	1493102	608	MseI-[AA]SmaI	815	1493102	826	repeat	Alu	SINE	AluSx
1162	1	1499029	1499156	128	MseI-[AA]SmaI	816	1499156	837	repeat	Alu	SINE	AluSx
1165	1	1500431	1500677	247	MseI-[AA]SmaI	818	1500677	838	repeat	Alu	SINE	AluY
1167	1	1503811	1503908	98	MseI-[AA]SmaI	819	1503908	842	repeat	Alu	SINE	AluSz6
1172	1	1507268	1507488	221	SmaI[TT]-MseI	821	1507267	850	repeat	Alu	SINE	AluY
1175	1	1511056	1511299	244	MseI-[AA]SmaI	823	1511299	856	repeat	Alu	SINE	AluY
1181	1	1520022	1520239	218	SmaI[TT]-MseI	826	1520021	870	repeat	Alu	SINE	AluSx3
1183	1	1520778	1521155	378	SmaI[TT]-MseI	827	1520777	872	repeat	Alu	SINE	AluSx
1185	1	1521945	1522158	214	SmaI[TT]-MseI	828	1521944	875	repeat	Alu	SINE	AluY
1188	1	1522864	1523220	357	SmaI[TT]-MseI	830	1522863	878	repeat	Alu	SINE	AluY
1189	1	1523221	1523446	226	MseI-[AA]SmaI	831	1523446	880	repeat	Alu	SINE	AluY
1191	1	1523616	1524469	854	MseI-[AA]SmaI	832	1524469	882	repeat	Alu	SINE	AluSx
1194	1	1526731	1527054	324	SmaI[TT]-MseI	833	1526730	887	repeat	Alu	SINE	AluSx
1210	1	1550313	1550514	202	MseI-[AA]SmaI	845	1550514	5232590	island	CpGi	NULL	NULL
1257	1	1580034	1580278	245	MseI-[AA]SmaI	886	1580278	917	repeat	Alu	SINE	AluSc8
1260	1	1587008	1587261	254	MseI-[AA]SmaI	888	1587261	929	repeat	Alu	SINE	AluSc
1269	1	1591102	1591454	353	SmaI[TT]-MseI	893	1591101	937	repeat	Alu	SINE	AluSz
1271	1	1592169	1592946	778	SmaI[TT]-MseI	894	1592168	939	repeat	Alu	SINE	AluY
1274	1	1597975	1598468	494	MseI-[AA]SmaI	896	1598468	948	repeat	Alu	SINE	AluSx
1279	1	1600838	1601116	279	MseI-[AA]SmaI	899	1601116	5232617	island	CpGi	NULL	NULL
1281	1	1604524	1605033	510	MseI-[AA]SmaI	900	1605033	957	repeat	Alu	SINE	AluSg
1293	1	1610974	1611490	517	MseI-[AA]SmaI	908	1611490	963	repeat	Alu	SINE	AluSp
1320	1	1626794	1627481	688	SmaI[TT]-MseI	925	1626793	994	repeat	Alu	SINE	AluSg
1344	1	1643249	1643493	245	MseI-[AA]SmaI	945	1643493	1002	repeat	Alu	SINE	AluSc8
1354	1	1656391	1656743	353	SmaI[TT]-MseI	951	1656390	1021	repeat	Alu	SINE	AluSz
1359	1	1664621	1664841	221	MseI-[AA]SmaI	954	1664841	1036	repeat	Alu	SINE	AluSx
1361	1	1667060	1667567	508	MseI-[AA]SmaI	955	1667567	1041	repeat	Alu	SINE	AluSg
1379	1	1679025	1679712	688	SmaI[TT]-MseI	966	1679024	1059	repeat	Alu	SINE	AluSg
1397	1	1697683	1697769	87	MseI-[AA]SmaI	977	1697769	1072	repeat	Alu	SINE	AluSp
1400	1	1698447	1698750	304	SmaI[TT]-MseI	978	1698446	1074	repeat	Alu	SINE	AluSz
1401	1	1707592	1708136	545	MseI-[AA]SmaI	979	1708136	1096	repeat	Alu	SINE	AluSg
1412	1	1716096	1716185	90	SmaI[TT]-MseI	985	1716095	1106	repeat	Alu	SINE	AluY
1420	1	1736281	1736525	245	MseI-[AA]SmaI	990	1736525	1125	repeat	Alu	SINE	AluSx
1424	1	1745937	1746475	539	MseI-[AA]SmaI	992	1746475	1145	repeat	Alu	SINE	AluY
1430	1	1750009	1750226	218	MseI-[AA]SmaI	995	1750226	1149	repeat	Alu	SINE	AluSx
1435	1	1756105	1756453	349	SmaI[TT]-MseI	997	1756104	1159	repeat	Alu	SINE	AluSx
1439	1	1761793	1761988	196	SmaI[TT]-MseI	999	1761792	1166	repeat	Alu	SINE	AluYc3
1443	1	1766201	1766279	79	SmaI[TT]-MseI	1001	1766200	1173	repeat	Alu	SINE	AluY
1446	1	1782324	1782773	450	MseI-[AA]SmaI	1003	1782773	1203	repeat	Alu	SINE	AluSp
1449	1	1783761	1783981	221	SmaI[TT]-MseI	1004	1783760	1207	repeat	Alu	SINE	AluY
1452	1	1791606	1792471	866	MseI-[AA]SmaI	1006	1792471	1222	repeat	Alu	SINE	AluSz6
1458	1	1796317	1796625	309	MseI-[AA]SmaI	1009	1796625	1228	repeat	Alu	SINE	AluY
1461	1	1798074	1798317	244	MseI-[AA]SmaI	1011	1798317	1231	repeat	Alu	SINE	AluY
1464	1	1799708	1799923	216	SmaI[TT]-MseI	1012	1799707	1233	repeat	Alu	SINE	AluSq2
1465	1	1811743	1811949	207	MseI-[AA]SmaI	1013	1811949	1256	repeat	Alu	SINE	AluYc3
1468	1	1816215	1816450	236	SmaI[TT]-MseI	1014	1816214	1265	repeat	Alu	SINE	AluY
1472	1	1817089	1817300	212	SmaI[TT]-MseI	1016	1817088	1267	repeat	Alu	SINE	AluY
1474	1	1818238	1818460	223	SmaI[TT]-MseI	1017	1818237	1269	repeat	Alu	SINE	AluY
1476	1	1819148	1819223	76	SmaI[TT]-MseI	1018	1819147	1270	repeat	Alu	SINE	AluSz6
1477	1	1819780	1820201	422	MseI-[AA]SmaI	1019	1820201	1271	repeat	Alu	SINE	AluSq
1493	1	1828425	1828824	400	SmaI[TT]-MseI	1029	1828424	1276	repeat	Alu	SINE	AluY
1500	1	1834230	1834315	86	SmaI[TT]-MseI	1033	1834229	1286	repeat	Alu	SINE	AluSc
1502	1	1835049	1835277	229	SmaI[TT]-MseI	1034	1835048	1288	repeat	Alu	SINE	AluY
1504	1	1839245	1839666	422	SmaI[TT]-MseI	1035	1839244	1301	repeat	Alu	SINE	AluY
1541	1	1872250	1872476	227	MseI-[AA]SmaI	1061	1872476	1321	repeat	Alu	SINE	AluY
1549	1	1876448	1876670	223	MseI-[AA]SmaI	1067	1876670	1323	repeat	Alu	SINE	AluJb
1557	1	1879405	1879931	527	SmaI[TT]-MseI	1072	1879404	1325	repeat	Alu	SINE	AluSg
1559	1	1880691	1880952	262	SmaI[TT]-MseI	1073	1880690	1329	repeat	Alu	SINE	AluSz6
1561	1	1884828	1885481	654	SmaI[TT]-MseI	1074	1884827	1334	repeat	Alu	SINE	AluSq2
1587	1	1903775	1904209	435	MseI-[AA]SmaI	1090	1904209	1343	repeat	Alu	SINE	AluSx
1612	1	1922873	1922966	94	MseI-[AA]SmaI	1106	1922966	1353	repeat	Alu	SINE	AluSx
1614	1	1925102	1925345	244	MseI-[AA]SmaI	1107	1925345	1359	repeat	Alu	SINE	AluY
1616	1	1926721	1926855	135	MseI-[AA]SmaI	1108	1926855	1361	repeat	Alu	SINE	AluSz
1618	1	1927052	1927271	220	MseI-[AA]SmaI	1109	1927271	1362	repeat	Alu	SINE	AluY
1624	1	1936092	1936316	225	MseI-[AA]SmaI	1112	1936316	1374	repeat	Alu	SINE	AluSz
1626	1	1939160	1939372	213	MseI-[AA]SmaI	1113	1939372	1382	repeat	Alu	SINE	AluSx1
1628	1	1939968	1940188	221	MseI-[AA]SmaI	1114	1940188	1384	repeat	Alu	SINE	AluSg
1630	1	1944170	1944438	269	MseI-[AA]SmaI	1115	1944438	1391	repeat	Alu	SINE	AluSx
1649	1	1957973	1958198	226	MseI-[AA]SmaI	1126	1958198	1398	repeat	Alu	SINE	AluY
1661	1	1966260	1966498	239	SmaI[TT]-MseI	1133	1966259	1402	repeat	Alu	SINE	AluSc
1666	1	1971819	1972039	221	MseI-[AA]SmaI	1136	1972039	1407	repeat	Alu	SINE	AluY
1680	1	1980200	1980253	54	MseI-[AA]SmaI	1146	1980253	1770588	repeat	LINE	LINE	L2a
1693	1	1983361	1983466	106	SmaI[TT]-MseI	1156	1983360	5232715	shore	Unique	NULL	NULL
1699	1	1986475	1986695	221	SmaI[TT]-MseI	1159	1986474	1414	repeat	Alu	SINE	AluY
1701	1	1989400	1990014	615	SmaI[TT]-MseI	1160	1989399	1418	repeat	Alu	SINE	AluSc8
1706	1	1996928	1997042	115	MseI-[AA]SmaI	1164	1997042	1426	repeat	Alu	SINE	AluY
1716	1	2003450	2003685	236	MseI-[AA]SmaI	1170	2003685	1432	repeat	MIR	SINE	MIR
1729	1	2018615	2019004	390	SmaI[TT]-MseI	1178	2018614	1441	repeat	Alu	SINE	AluSx1
1760	1	2045888	2046137	250	MseI-[AA]SmaI	1198	2046137	1453	repeat	Alu	SINE	AluSc
1775	1	2070740	2070952	213	MseI-[AA]SmaI	1206	2070952	1465	repeat	Alu	SINE	AluSg7
1794	1	2094999	2095262	264	MseI-[AA]SmaI	1216	2095262	1483	repeat	Alu	SINE	AluY
1813	1	2120148	2120368	221	MseI-[AA]SmaI	1226	2120368	1492	repeat	Alu	SINE	AluY
1819	1	2122889	2123104	216	MseI-[AA]SmaI	1230	2123104	1494	repeat	Alu	SINE	AluSx
1892	1	2172925	2173181	257	SmaI[TT]-MseI	1286	2172924	1533	repeat	Alu	SINE	AluY
1894	1	2175498	2175717	220	SmaI[TT]-MseI	1287	2175497	1535	repeat	Alu	SINE	AluY
1904	1	2197244	2197331	88	MseI-[AA]SmaI	1293	2197331	1553	repeat	Alu	SINE	AluJb
1920	1	2207045	2207260	216	SmaI[TT]-MseI	1302	2207044	1555	repeat	Alu	SINE	AluY
1928	1	2217097	2217643	547	SmaI[TT]-MseI	1306	2217096	1560	repeat	Alu	SINE	AluSx1
1933	1	2219521	2219872	352	SmaI[TT]-MseI	1309	2219520	1564	repeat	Alu	SINE	AluSp
1990	1	2262340	2263069	730	MseI-[AA]SmaI	1351	2263069	NA	NULL	Unique	NULL	NULL
2020	1	2293364	2293595	232	MseI-[AA]SmaI	1370	2293595	1580	repeat	Alu	SINE	AluSg
2052	1	2331922	2331981	60	SmaI[TT]-MseI	1389	2331921	5232810	shore	Unique	NULL	NULL
2069	1	2342768	2342990	223	SmaI[TT]-MseI	1399	2342767	1608	repeat	Alu	SINE	AluSz
2081	1	2352477	2352847	371	SmaI[TT]-MseI	1408	2352476	1614	repeat	Alu	SINE	AluSx
2104	1	2370826	2370996	171	SmaI[TT]-MseI	1427	2370825	5232825	shore	Unique	NULL	NULL
2276	1	2510809	2511131	323	SmaI[TT]-MseI	1551	2510808	1665	repeat	Alu	SINE	AluSx1
2319	1	2548475	2548790	316	MseI-[AA]SmaI	1581	2548790	1683	repeat	Alu	SINE	AluY
2322	1	2551936	2552031	96	SmaI[TT]-MseI	1582	2551935	NA	NULL	Unique	NULL	NULL
2373	1	2695960	2696299	340	SmaI[TT]-MseI	1619	2695959	1697	repeat	Alu	SINE	AluSc8
2415	1	2745598	2745636	39	SmaI[TT]-MseI	1650	2745597	NA	NULL	Unique	NULL	NULL
2430	1	2751998	2752225	228	SmaI[TT]-MseI	1659	2751997	NA	NULL	Unique	NULL	NULL
2647	1	3005440	3006163	724	SmaI[TT]-MseI	1791	3005439	1765	repeat	Alu	SINE	AluSx
2755	1	3112116	3112575	460	MseI-[AA]SmaI	1855	3112575	5232982	shore	Unique	NULL	NULL
2760	1	3117000	3117217	218	SmaI[TT]-MseI	1858	3116999	1787	repeat	Alu	SINE	AluY
2797	1	3150455	3150702	248	MseI-[AA]SmaI	1880	3150702	NA	NULL	Unique	NULL	NULL
2801	1	3153294	3154089	796	SmaI[TT]-MseI	1883	3153293	1796	repeat	MIR	SINE	MIRb
2855	1	3206624	3206705	82	MseI-[AA]SmaI	1916	3206705	NA	NULL	Unique	NULL	NULL
2864	1	3212761	3213071	311	MseI-[AA]SmaI	1921	3213071	NA	NULL	Unique	NULL	NULL
2868	1	3219277	3219419	143	MseI-[AA]SmaI	1923	3219419	3251910	repeat	Rest	DNA	MER82
2886	1	3237057	3237192	136	SmaI[TT]-MseI	1932	3237056	NA	NULL	Unique	NULL	NULL
2900	1	3260291	3260602	312	SmaI[TT]-MseI	1940	3260290	1818	repeat	Alu	SINE	AluY
2936	1	3300138	3300249	112	MseI-[AA]SmaI	1962	3300249	NA	NULL	Unique	NULL	NULL
2951	1	3307493	3307714	222	SmaI[TT]-MseI	1971	3307492	1829	repeat	Alu	SINE	AluSq2
2954	1	3309713	3309756	44	MseI-[AA]SmaI	1973	3309756	5233017	shore	Unique	NULL	NULL
2994	1	3341735	3342469	735	SmaI[TT]-MseI	2000	3341734	1833	repeat	Alu	SINE	AluY
3021	1	3360139	3360429	291	SmaI[TT]-MseI	2015	3360138	1835	repeat	Alu	SINE	AluSx
3057	1	3402203	3402420	218	MseI-[AA]SmaI	2045	3402420	1871	repeat	Alu	SINE	AluY
3133	1	3476086	3476499	414	MseI-[AA]SmaI	2098	3476499	1889	repeat	Alu	SINE	AluSx3
3190	1	3519098	3519618	521	MseI-[AA]SmaI	2138	3519618	NA	NULL	Unique	NULL	NULL
3216	1	3553092	3553132	41	SmaI[TT]-MseI	2153	3553091	NA	NULL	Unique	NULL	NULL
3238	1	3576339	3576552	214	SmaI[TT]-MseI	2169	3576338	1914	repeat	Alu	SINE	AluSz6
3293	1	3631782	3631851	70	MseI-[AA]SmaI	2208	3631851	NA	NULL	Unique	NULL	NULL
3331	1	3674846	3675152	307	SmaI[TT]-MseI	2231	3674845	1969	repeat	Alu	SINE	AluSc
3360	1	3709118	3709325	208	SmaI[TT]-MseI	2248	3709117	1995	repeat	Alu	SINE	AluSc
3363	1	3710021	3710683	663	MseI-[AA]SmaI	2250	3710683	1997	repeat	Alu	SINE	AluY
3365	1	3711320	3711542	223	MseI-[AA]SmaI	2251	3711542	1999	repeat	Alu	SINE	AluSz
3373	1	3725747	3726644	898	SmaI[TT]-MseI	2255	3725746	2010	repeat	Alu	SINE	AluSp
3374	1	3727172	3727395	224	MseI-[AA]SmaI	2256	3727395	2013	repeat	Alu	SINE	AluSx1
3376	1	3729045	3729328	284	MseI-[AA]SmaI	2257	3729328	2016	repeat	Alu	SINE	AluSx3
3379	1	3729908	3730130	223	SmaI[TT]-MseI	2258	3729907	2017	repeat	Alu	SINE	AluSx
3383	1	3732346	3732738	393	SmaI[TT]-MseI	2260	3732345	2019	repeat	Alu	SINE	AluSx1
3386	1	3735677	3735744	68	MseI-[AA]SmaI	2262	3735744	1770991	repeat	LINE	LINE	L1MB7
3391	1	3740744	3741067	324	SmaI[TT]-MseI	2264	3740743	2021	repeat	Alu	SINE	AluSp
3397	1	3749642	3749859	218	SmaI[TT]-MseI	2267	3749641	2026	repeat	Alu	SINE	AluSc
3399	1	3756894	3757436	543	SmaI[TT]-MseI	2268	3756893	2035	repeat	Alu	SINE	AluSz
3407	1	3764492	3764632	141	SmaI[TT]-MseI	2272	3764491	2046	repeat	Alu	SINE	AluSx
3408	1	3764802	3765020	219	MseI-[AA]SmaI	2273	3765020	2047	repeat	Alu	SINE	AluY
3412	1	3772684	3772870	187	MseI-[AA]SmaI	2275	3772870	2054	repeat	Alu	SINE	AluSz
3425	1	3783553	3783773	221	SmaI[TT]-MseI	2283	3783552	2064	repeat	Alu	SINE	AluY
3427	1	3790137	3790358	222	SmaI[TT]-MseI	2284	3790136	2071	repeat	Alu	SINE	AluSp
3429	1	3792086	3792312	227	SmaI[TT]-MseI	2285	3792085	1771017	repeat	LINE	LINE	L1MEe
3441	1	3805251	3805482	232	MseI-[AA]SmaI	2292	3805482	2084	repeat	Alu	SINE	AluSx
3462	1	3814543	3814996	454	MseI-[AA]SmaI	2311	3814996	2089	repeat	Alu	SINE	AluSx1
3468	1	3818543	3818763	221	SmaI[TT]-MseI	2315	3818542	2091	repeat	Alu	SINE	AluY
3471	1	3821097	3821405	309	SmaI[TT]-MseI	2317	3821096	NA	NULL	Unique	NULL	NULL
3479	1	3830509	3831410	902	SmaI[TT]-MseI	2321	3830508	2094	repeat	Alu	SINE	AluSz
3498	1	4022612	4023426	815	SmaI[TT]-MseI	2331	4022611	2122	repeat	Alu	SINE	AluSg
3501	1	4036298	4036849	552	MseI-[AA]SmaI	2333	4036849	1771059	repeat	LINE	LINE	L2a
3511	1	4048944	4049029	86	SmaI[TT]-MseI	2338	4048943	2139	repeat	Alu	SINE	AluSq
3515	1	4059251	4060024	774	SmaI[TT]-MseI	2340	4059250	2147	repeat	Alu	SINE	AluSx
3533	1	4114513	4114583	71	SmaI[TT]-MseI	2350	4114512	2173	repeat	Alu	SINE	AluSc8
3546	1	4135901	4136106	206	MseI-[AA]SmaI	2357	4136106	NA	NULL	Unique	NULL	NULL
3551	1	4155255	4155546	292	SmaI[TT]-MseI	2359	4155254	2189	repeat	Alu	SINE	AluYb8
3562	1	4202535	4203389	855	SmaI[TT]-MseI	2365	4202534	2204	repeat	Alu	SINE	AluY
3570	1	4221061	4221283	223	SmaI[TT]-MseI	2369	4221060	2218	repeat	Alu	SINE	AluY
3584	1	4255876	4256085	210	MseI-[AA]SmaI	2377	4256085	2233	repeat	Alu	SINE	AluSc
3586	1	4271126	4271373	248	MseI-[AA]SmaI	2378	4271373	2236	repeat	Alu	SINE	AluYb8
3588	1	4271602	4271745	144	SmaI[TT]-MseI	2379	4271601	NA	NULL	Unique	NULL	NULL
3591	1	4279462	4279679	218	MseI-[AA]SmaI	2381	4279679	2241	repeat	Alu	SINE	AluSg4
3594	1	4287191	4287439	249	SmaI[TT]-MseI	2382	4287190	2247	repeat	Alu	SINE	AluSg
3596	1	4290328	4290639	312	SmaI[TT]-MseI	2383	4290327	2248	repeat	Alu	SINE	AluY
3597	1	4313525	4313792	268	MseI-[AA]SmaI	2384	4313792	2256	repeat	Alu	SINE	AluSp
3606	1	4334390	4334673	284	SmaI[TT]-MseI	2388	4334389	2259	repeat	Alu	SINE	AluSx
3620	1	4395652	4395998	347	MseI-[AA]SmaI	2396	4395998	NA	NULL	Unique	NULL	NULL
3624	1	4412008	4412509	502	MseI-[AA]SmaI	2398	4412509	2294	repeat	Alu	SINE	AluY
3635	1	4436698	4437578	881	MseI-[AA]SmaI	2404	4437578	NA	NULL	Unique	NULL	NULL
3642	1	4467470	4467706	237	SmaI[TT]-MseI	2407	4467469	2311	repeat	Alu	SINE	AluSz6
3655	1	4557814	4558322	509	MseI-[AA]SmaI	2414	4558322	2347	repeat	Alu	SINE	AluSx1
3671	1	4581727	4581828	102	SmaI[TT]-MseI	2422	4581726	NA	NULL	Unique	NULL	NULL
3678	1	4615105	4615649	545	MseI-[AA]SmaI	2426	4615649	2364	repeat	Alu	SINE	AluY
3681	1	4623160	4623445	286	SmaI[TT]-MseI	2427	4623159	2369	repeat	Alu	SINE	AluSz
3697	1	4678847	4679095	249	SmaI[TT]-MseI	2435	4678846	2386	repeat	Alu	SINE	AluSq2
3724	1	4716454	4716833	380	SmaI[TT]-MseI	2453	4716453	5233136	island	CpGi	NULL	NULL
3733	1	4748509	4748756	248	MseI-[AA]SmaI	2459	4748756	2419	repeat	Alu	SINE	AluSx
3759	1	4788519	4789185	667	SmaI[TT]-MseI	2473	4788518	NA	NULL	Unique	NULL	NULL
3766	1	4800552	4800770	219	MseI-[AA]SmaI	2477	4800770	2442	repeat	Alu	SINE	AluY
3794	1	4859209	4859581	373	MseI-[AA]SmaI	2493	4859581	NA	NULL	Unique	NULL	NULL
3803	1	4972079	4972195	117	SmaI[TT]-MseI	2497	4972078	NA	NULL	Unique	NULL	NULL
3812	1	5007050	5007198	149	MseI-[AA]SmaI	2502	5007198	NA	NULL	Unique	NULL	NULL
3832	1	5056501	5056909	409	SmaI[TT]-MseI	2512	5056500	2528	repeat	Alu	SINE	AluSq
3833	1	5078409	5078748	340	MseI-[AA]SmaI	2513	5078748	2538	repeat	Alu	SINE	AluSq2
3839	1	5148089	5148360	272	MseI-[AA]SmaI	2516	5148360	2557	repeat	Alu	SINE	AluSp
3844	1	5162509	5162731	223	SmaI[TT]-MseI	2518	5162508	2564	repeat	Alu	SINE	AluSx
3848	1	5194769	5195065	297	SmaI[TT]-MseI	2520	5194768	2575	repeat	Alu	SINE	AluSz
3853	1	5219425	5219912	488	MseI-[AA]SmaI	2523	5219912	2582	repeat	Alu	SINE	AluY
3868	1	5284460	5284665	206	SmaI[TT]-MseI	2530	5284459	2599	repeat	Alu	SINE	AluSc
3875	1	5322716	5322942	227	MseI-[AA]SmaI	2534	5322942	2615	repeat	Alu	SINE	AluSg
3887	1	5340011	5340646	636	SmaI[TT]-MseI	2541	5340010	2623	repeat	Alu	SINE	AluSx
3891	1	5355548	5355847	300	SmaI[TT]-MseI	2543	5355547	2630	repeat	Alu	SINE	AluY
3896	1	5402878	5403235	358	MseI-[AA]SmaI	2546	5403235	NA	NULL	Unique	NULL	NULL
3900	1	5405202	5405422	221	SmaI[TT]-MseI	2548	5405201	2661	repeat	Alu	SINE	AluSq2
3902	1	5408615	5408834	220	SmaI[TT]-MseI	2549	5408614	2664	repeat	Alu	SINE	AluSg
3903	1	5411783	5412017	235	MseI-[AA]SmaI	2550	5412017	2666	repeat	Alu	SINE	AluSx1
3906	1	5432746	5433080	335	SmaI[TT]-MseI	2551	5432745	2674	repeat	Alu	SINE	AluSz
3909	1	5443838	5444063	226	MseI-[AA]SmaI	2553	5444063	2678	repeat	Alu	SINE	AluSx
3931	1	5525019	5525196	178	SmaI[TT]-MseI	2565	5525018	2705	repeat	Alu	SINE	AluYa5
3945	1	5544704	5544818	115	SmaI[TT]-MseI	2572	5544703	2714	repeat	MIR	SINE	MIR
3961	1	5583321	5583552	232	MseI-[AA]SmaI	2581	5583552	2725	repeat	Alu	SINE	AluSg
3966	1	5617912	5618165	254	SmaI[TT]-MseI	2583	5617911	2736	repeat	Alu	SINE	AluYf4
3967	1	5623306	5623343	38	MseI-[AA]SmaI	2584	5623343	2737	repeat	Alu	SINE	AluSx
3972	1	5652631	5652848	218	SmaI[TT]-MseI	2586	5652630	2749	repeat	Alu	SINE	AluSq
3975	1	5655541	5655713	173	MseI-[AA]SmaI	2588	5655713	3253757	repeat	ERV	LTR	MLT1D
3977	1	5656209	5656432	224	MseI-[AA]SmaI	2589	5656432	2752	repeat	Alu	SINE	AluY
4002	1	5726649	5726921	273	MseI-[AA]SmaI	2602	5726921	2777	repeat	Alu	SINE	AluSx
4013	1	5757926	5758033	108	SmaI[TT]-MseI	2607	5757925	2791	repeat	Alu	SINE	AluSp
4018	1	5763971	5764220	250	MseI-[AA]SmaI	2610	5764220	2799	repeat	Alu	SINE	AluY
4033	1	5793868	5794396	529	SmaI[TT]-MseI	2618	5793867	5233153	shore	Unique	NULL	NULL
4059	1	5830191	5830573	383	MseI-[AA]SmaI	2633	5830573	2831	repeat	Alu	SINE	AluSz
4066	1	5844296	5844486	191	MseI-[AA]SmaI	2637	5844486	2846	repeat	Alu	SINE	AluSq2
4073	1	5871522	5872263	742	MseI-[AA]SmaI	2641	5872263	2856	repeat	Alu	SINE	AluSc8
4091	1	5898166	5898187	22	SmaI[TT]-MseI	2653	5898165	NA	NULL	Unique	NULL	NULL
4136	1	5972302	5972522	221	MseI-[AA]SmaI	2677	5972522	2883	repeat	Alu	SINE	AluY
4140	1	5977665	5977897	233	MseI-[AA]SmaI	2679	5977897	3254002	repeat	ERV	LTR	MLT1I
4151	1	5988031	5988288	258	MseI-[AA]SmaI	2685	5988288	1771949	repeat	LINE	LINE	L1MD2
4197	1	6068385	6068605	221	MseI-[AA]SmaI	2710	6068605	2932	repeat	Alu	SINE	AluSx
4216	1	6098028	6098250	223	SmaI[TT]-MseI	2719	6098027	2962	repeat	Alu	SINE	AluY
4224	1	6118282	6118455	174	MseI-[AA]SmaI	2724	6118455	2973	repeat	MIR	SINE	MIRb
4227	1	6121904	6122298	395	MseI-[AA]SmaI	2726	6122298	2976	repeat	Alu	SINE	AluSp
4282	1	6170932	6171518	587	MseI-[AA]SmaI	2760	6171518	2997	repeat	Alu	SINE	AluSz
4284	1	6174158	6174237	80	MseI-[AA]SmaI	2761	6174237	2999	repeat	Alu	SINE	AluSg
4286	1	6174631	6174998	368	MseI-[AA]SmaI	2762	6174998	3000	repeat	Alu	SINE	AluSx1
4288	1	6180699	6180887	189	MseI-[AA]SmaI	2763	6180887	3009	repeat	Alu	SINE	AluSc
4321	1	6218133	6218991	859	MseI-[AA]SmaI	2786	6218991	3043	repeat	Alu	SINE	AluYa5
4325	1	6221537	6221610	74	MseI-[AA]SmaI	2788	6221610	NA	NULL	Unique	NULL	NULL
4352	1	6242220	6242440	221	SmaI[TT]-MseI	2805	6242219	3058	repeat	Alu	SINE	AluSc
4353	1	6246937	6247598	662	MseI-[AA]SmaI	2806	6247598	3061	repeat	Alu	SINE	AluSc8
4356	1	6248939	6249436	498	SmaI[TT]-MseI	2807	6248938	3064	repeat	Alu	SINE	AluSp
4357	1	6250898	6251659	762	MseI-[AA]SmaI	2808	6251659	3070	repeat	Alu	SINE	AluY
4370	1	6276714	6276801	88	SmaI[TT]-MseI	2815	6276713	3109	repeat	Alu	SINE	AluSc8
4371	1	6282184	6282407	224	MseI-[AA]SmaI	2816	6282407	3113	repeat	Alu	SINE	AluSz
4376	1	6288496	6288787	292	SmaI[TT]-MseI	2818	6288495	3124	repeat	Alu	SINE	AluY
4377	1	6288788	6289017	230	MseI-[AA]SmaI	2819	6289017	3126	repeat	Alu	SINE	AluSx
4380	1	6289555	6289643	89	MseI-[AA]SmaI	2821	6289643	3129	repeat	Alu	SINE	AluSx
4388	1	6296935	6297149	215	SmaI[TT]-MseI	2825	6296934	3144	repeat	Alu	SINE	AluY
4408	1	6315352	6316025	674	SmaI[TT]-MseI	2840	6315351	3158	repeat	Alu	SINE	AluY
4410	1	6316523	6316624	102	SmaI[TT]-MseI	2841	6316522	3162	repeat	Alu	SINE	AluSz6
4433	1	6335629	6335701	73	MseI-[AA]SmaI	2857	6335701	3172	repeat	Alu	SINE	AluSg
4442	1	6344474	6344560	87	MseI-[AA]SmaI	2862	6344560	3176	repeat	Alu	SINE	AluSq2
4449	1	6358288	6358984	697	SmaI[TT]-MseI	2865	6358287	3190	repeat	Alu	SINE	AluSx1
4450	1	6375527	6375735	209	MseI-[AA]SmaI	2866	6375735	3195	repeat	Alu	SINE	AluY
4457	1	6381668	6381873	206	SmaI[TT]-MseI	2869	6381667	3201	repeat	Alu	SINE	AluYc
4460	1	6385164	6385382	219	MseI-[AA]SmaI	2871	6385382	3204	repeat	Alu	SINE	AluY
4463	1	6387927	6388147	221	SmaI[TT]-MseI	2872	6387926	3206	repeat	Alu	SINE	AluSc
4473	1	6399893	6400484	592	SmaI[TT]-MseI	2877	6399892	3216	repeat	Alu	SINE	AluYa8
4476	1	6401514	6401726	213	MseI-[AA]SmaI	2879	6401726	3221	repeat	Alu	SINE	AluY
4496	1	6425531	6425752	222	MseI-[AA]SmaI	2891	6425752	3247	repeat	Alu	SINE	AluY
4498	1	6426048	6426295	248	SmaI[TT]-MseI	2892	6426047	3248	repeat	Alu	SINE	AluSx
4503	1	6435807	6435922	116	MseI-[AA]SmaI	2895	6435922	3266	repeat	Alu	SINE	AluY
4507	1	6439049	6439473	425	SmaI[TT]-MseI	2897	6439048	3274	repeat	Alu	SINE	AluY
4508	1	6441897	6442122	226	MseI-[AA]SmaI	2898	6442122	3278	repeat	Alu	SINE	AluY
4511	1	6443341	6443562	222	SmaI[TT]-MseI	2899	6443340	3282	repeat	Alu	SINE	AluY
4513	1	6443858	6444081	224	SmaI[TT]-MseI	2900	6443857	3284	repeat	Alu	SINE	AluY
4517	1	6448262	6448485	224	SmaI[TT]-MseI	2902	6448261	3289	repeat	Alu	SINE	AluY
4518	1	6448797	6449025	229	MseI-[AA]SmaI	2903	6449025	3291	repeat	Alu	SINE	AluY
4529	1	6458623	6458842	220	SmaI[TT]-MseI	2909	6458622	3306	repeat	Alu	SINE	AluSx1
4530	1	6464447	6464692	246	MseI-[AA]SmaI	2910	6464692	3319	repeat	Alu	SINE	AluY
4558	1	6499777	6499993	217	MseI-[AA]SmaI	2927	6499993	3367	repeat	Alu	SINE	AluSx3
4565	1	6502765	6502852	88	MseI-[AA]SmaI	2933	6502852	3373	repeat	Alu	SINE	AluSc
4592	1	6526696	6526782	87	MseI-[AA]SmaI	2952	6526782	3392	repeat	Alu	SINE	AluSz
4605	1	6538797	6539009	213	SmaI[TT]-MseI	2960	6538796	3399	repeat	Alu	SINE	AluSx
4635	1	6563561	6563779	219	SmaI[TT]-MseI	2982	6563560	3428	repeat	Alu	SINE	AluSq2
4637	1	6564723	6565631	909	SmaI[TT]-MseI	2983	6564722	3430	repeat	Alu	SINE	AluY
4642	1	6572848	6572973	126	SmaI[TT]-MseI	2986	6572847	3439	repeat	MIR	SINE	MIR
4643	1	6574360	6574745	386	MseI-[AA]SmaI	2987	6574745	3442	repeat	Alu	SINE	AluSg
4645	1	6576421	6576641	221	MseI-[AA]SmaI	2988	6576641	3447	repeat	Alu	SINE	AluSx1
4648	1	6578997	6579107	111	SmaI[TT]-MseI	2989	6578996	3453	repeat	Alu	SINE	AluY
4649	1	6582862	6583145	284	MseI-[AA]SmaI	2990	6583145	3460	repeat	Alu	SINE	AluSg
4651	1	6583342	6583563	222	MseI-[AA]SmaI	2991	6583563	3461	repeat	Alu	SINE	AluSq
4655	1	6586764	6587231	468	MseI-[AA]SmaI	2993	6587231	3464	repeat	Alu	SINE	AluSx1
4657	1	6590217	6590438	222	MseI-[AA]SmaI	2994	6590438	3470	repeat	Alu	SINE	AluSq2
4659	1	6598388	6598956	569	MseI-[AA]SmaI	2995	6598956	3489	repeat	Alu	SINE	AluSx
4662	1	6600139	6600494	356	SmaI[TT]-MseI	2996	6600138	3491	repeat	Alu	SINE	AluSx
4668	1	6610185	6610461	277	SmaI[TT]-MseI	2999	6610184	3514	repeat	Alu	SINE	AluSc8
4669	1	6611698	6612019	322	MseI-[AA]SmaI	3000	6612019	3518	repeat	Alu	SINE	AluY
4672	1	6612965	6613186	222	SmaI[TT]-MseI	3001	6612964	3522	repeat	Alu	SINE	AluSx
4673	1	6613603	6613826	224	MseI-[AA]SmaI	3002	6613826	3524	repeat	Alu	SINE	AluSc8
4677	1	6616773	6617043	271	MseI-[AA]SmaI	3005	6617043	3528	repeat	Alu	SINE	AluSx3
4681	1	6627323	6627544	222	MseI-[AA]SmaI	3007	6627544	3545	repeat	Alu	SINE	AluY
4685	1	6628164	6628439	276	MseI-[AA]SmaI	3009	6628439	3546	repeat	Alu	SINE	AluY
4688	1	6633816	6634031	216	SmaI[TT]-MseI	3010	6633815	3550	repeat	Alu	SINE	AluYg6
4708	1	6655962	6656383	422	MseI-[AA]SmaI	3022	6656383	3570	repeat	Alu	SINE	AluSx
4720	1	6665439	6665620	182	MseI-[AA]SmaI	3030	6665620	3579	repeat	Alu	SINE	AluSq2
4724	1	6669202	6669319	118	MseI-[AA]SmaI	3032	6669319	3591	repeat	Alu	SINE	AluSx
4726	1	6670307	6670674	368	MseI-[AA]SmaI	3033	6670674	3593	repeat	Alu	SINE	AluSq
4728	1	6671388	6671694	307	MseI-[AA]SmaI	3034	6671694	3597	repeat	Alu	SINE	AluSc
4731	1	6672306	6672533	228	SmaI[TT]-MseI	3035	6672305	3599	repeat	Alu	SINE	AluSg
4745	1	6677240	6677801	562	SmaI[TT]-MseI	3047	6677239	3601	repeat	Alu	SINE	AluSx
4747	1	6679493	6679872	380	SmaI[TT]-MseI	3048	6679492	3607	repeat	Alu	SINE	AluSq
4749	1	6684426	6684791	366	SmaI[TT]-MseI	3049	6684425	3611	repeat	Alu	SINE	AluSq2
4757	1	6691390	6692031	642	MseI-[AA]SmaI	3055	6692031	3622	repeat	Alu	SINE	AluSx
4763	1	6703429	6703499	71	SmaI[TT]-MseI	3058	6703428	3633	repeat	Alu	SINE	AluY
4768	1	6708309	6708680	372	SmaI[TT]-MseI	3061	6708308	3639	repeat	Alu	SINE	AluSx1
4770	1	6709146	6709931	786	SmaI[TT]-MseI	3062	6709145	3641	repeat	Alu	SINE	AluJb
4773	1	6719528	6720040	513	MseI-[AA]SmaI	3064	6720040	3654	repeat	Alu	SINE	AluY
4776	1	6731396	6731895	500	SmaI[TT]-MseI	3065	6731395	3669	repeat	Alu	SINE	AluY
4777	1	6732755	6733321	567	MseI-[AA]SmaI	3066	6733321	3673	repeat	Alu	SINE	FLAM_A
4780	1	6742562	6743014	453	SmaI[TT]-MseI	3067	6742561	NA	NULL	Unique	NULL	NULL
4782	1	6747510	6747965	456	SmaI[TT]-MseI	3068	6747509	3689	repeat	Alu	SINE	AluY
4786	1	6752764	6753176	413	SmaI[TT]-MseI	3070	6752763	3694	repeat	Alu	SINE	AluSp
4788	1	6753537	6754218	682	SmaI[TT]-MseI	3071	6753536	3696	repeat	Alu	SINE	AluSg
4789	1	6754727	6754959	233	MseI-[AA]SmaI	3072	6754959	3699	repeat	Alu	SINE	AluY
4796	1	6762290	6762360	71	SmaI[TT]-MseI	3075	6762289	3710	repeat	Alu	SINE	AluSx
4804	1	6772889	6773255	367	MseI-[AA]SmaI	3080	6773255	3724	repeat	Alu	SINE	AluY
4807	1	6774313	6774543	231	SmaI[TT]-MseI	3081	6774312	3727	repeat	Alu	SINE	AluY
4812	1	6780667	6780900	234	SmaI[TT]-MseI	3084	6780666	3737	repeat	Alu	SINE	AluSg
4820	1	6788414	6788630	217	SmaI[TT]-MseI	3088	6788413	3748	repeat	Alu	SINE	AluSc
4822	1	6792585	6793087	503	SmaI[TT]-MseI	3089	6792584	3751	repeat	Alu	SINE	AluY
4823	1	6795384	6795626	243	MseI-[AA]SmaI	3090	6795626	3758	repeat	Alu	SINE	AluY
4827	1	6797269	6797903	635	SmaI[TT]-MseI	3092	6797268	3761	repeat	Alu	SINE	AluSz
4833	1	6805055	6805265	211	SmaI[TT]-MseI	3095	6805054	3772	repeat	Alu	SINE	AluSp
4838	1	6812039	6812553	515	SmaI[TT]-MseI	3098	6812038	3785	repeat	Alu	SINE	AluSg7
4842	1	6822860	6823163	304	SmaI[TT]-MseI	3100	6822859	3809	repeat	Alu	SINE	AluY
4847	1	6829998	6830264	267	MseI-[AA]SmaI	3103	6830264	3824	repeat	Alu	SINE	AluSx
4850	1	6835261	6835684	424	SmaI[TT]-MseI	3104	6835260	3831	repeat	Alu	SINE	AluSz
4851	1	6841339	6841552	214	MseI-[AA]SmaI	3105	6841552	3838	repeat	Alu	SINE	AluSg
4866	1	6858750	6859133	384	SmaI[TT]-MseI	3115	6858749	3851	repeat	Alu	SINE	AluYb8
4867	1	6863943	6864168	226	MseI-[AA]SmaI	3116	6864168	3856	repeat	Alu	SINE	AluSq2
4870	1	6888445	6888720	276	SmaI[TT]-MseI	3117	6888444	3878	repeat	Alu	SINE	AluSc
4873	1	6890497	6890702	206	SmaI[TT]-MseI	3119	6890496	3883	repeat	Alu	SINE	AluSx
4875	1	6897107	6897327	221	SmaI[TT]-MseI	3120	6897106	3888	repeat	Alu	SINE	AluY
4876	1	6899154	6899366	213	MseI-[AA]SmaI	3121	6899366	3890	repeat	Alu	SINE	AluSc8
4881	1	6907857	6908213	357	SmaI[TT]-MseI	3123	6907856	3897	repeat	Alu	SINE	AluSx3
4882	1	6920674	6920896	223	MseI-[AA]SmaI	3124	6920896	3904	repeat	Alu	SINE	AluSz
4884	1	6921118	6921421	304	SmaI[TT]-MseI	3125	6921117	3905	repeat	Alu	SINE	AluSz
4886	1	6922116	6922428	313	SmaI[TT]-MseI	3126	6922115	3906	repeat	Alu	SINE	AluSx1
4888	1	6943050	6943532	483	SmaI[TT]-MseI	3127	6943049	3922	repeat	Alu	SINE	AluSz6
4890	1	6965347	6965715	369	SmaI[TT]-MseI	3128	6965346	3931	repeat	Alu	SINE	AluSq
4894	1	6974258	6974506	249	SmaI[TT]-MseI	3130	6974257	3934	repeat	Alu	SINE	AluSq2
4901	1	7004069	7004440	372	MseI-[AA]SmaI	3134	7004440	1772356	repeat	LINE	LINE	L2a
4923	1	7042711	7042754	44	SmaI[TT]-MseI	3145	7042710	NA	NULL	Unique	NULL	NULL
4933	1	7057814	7057991	178	SmaI[TT]-MseI	3150	7057813	3988	repeat	Alu	SINE	AluSq
4937	1	7068957	7069423	467	MseI-[AA]SmaI	3153	7069423	NA	NULL	Unique	NULL	NULL
4945	1	7090988	7091183	196	SmaI[TT]-MseI	3157	7090987	4012	repeat	Alu	SINE	AluY
4947	1	7091693	7091941	249	SmaI[TT]-MseI	3158	7091692	4013	repeat	Alu	SINE	AluSc8
4949	1	7093747	7094014	268	SmaI[TT]-MseI	3159	7093746	4015	repeat	Alu	SINE	AluSz
4952	1	7097610	7097822	213	MseI-[AA]SmaI	3161	7097822	4019	repeat	Alu	SINE	AluY
4976	1	7163242	7163313	72	MseI-[AA]SmaI	3174	7163313	NA	NULL	Unique	NULL	NULL
4978	1	7171559	7171869	311	MseI-[AA]SmaI	3175	7171869	4053	repeat	Alu	SINE	AluSc8
4983	1	7186924	7187566	643	SmaI[TT]-MseI	3177	7186923	4061	repeat	Alu	SINE	AluY
4985	1	7191107	7191355	249	SmaI[TT]-MseI	3178	7191106	4067	repeat	Alu	SINE	AluSc
4988	1	7206470	7207408	939	MseI-[AA]SmaI	3180	7207408	4082	repeat	Alu	SINE	AluY
4990	1	7217105	7217329	225	MseI-[AA]SmaI	3181	7217329	4086	repeat	Alu	SINE	AluY
4995	1	7263985	7264228	244	SmaI[TT]-MseI	3183	7263984	4109	repeat	Alu	SINE	AluY
4997	1	7274520	7274734	215	SmaI[TT]-MseI	3184	7274519	4112	repeat	Alu	SINE	AluY
5011	1	7298645	7298867	223	MseI-[AA]SmaI	3192	7298867	4130	repeat	Alu	SINE	AluSx
5017	1	7316300	7316544	245	MseI-[AA]SmaI	3195	7316544	4138	repeat	Alu	SINE	AluY
5026	1	7344357	7344624	268	SmaI[TT]-MseI	3199	7344356	4149	repeat	Alu	SINE	AluSg
5031	1	7360422	7360661	240	MseI-[AA]SmaI	3202	7360661	4158	repeat	Alu	SINE	AluSq
5037	1	7387177	7387391	215	MseI-[AA]SmaI	3205	7387391	4168	repeat	Alu	SINE	AluYc3
5055	1	7437722	7437906	185	MseI-[AA]SmaI	3214	7437906	4194	repeat	Alu	SINE	AluSz
5120	1	7590968	7591186	219	SmaI[TT]-MseI	3249	7590967	4272	repeat	Alu	SINE	AluSq2
5131	1	7606109	7606445	337	SmaI[TT]-MseI	3256	7606108	4279	repeat	Alu	SINE	AluY
5167	1	7694800	7695593	794	MseI-[AA]SmaI	3275	7695593	4322	repeat	Alu	SINE	AluY
5184	1	7726081	7726153	73	MseI-[AA]SmaI	3286	7726153	4345	repeat	Alu	SINE	AluSq2
5199	1	7743042	7743159	118	MseI-[AA]SmaI	3295	7743159	4354	repeat	Alu	SINE	AluY
5212	1	7767040	7767377	338	SmaI[TT]-MseI	3303	7767039	4368	repeat	Alu	SINE	AluSg
5223	1	7817539	7817720	182	MseI-[AA]SmaI	3309	7817720	4413	repeat	Alu	SINE	AluSz
5227	1	7825793	7826011	219	MseI-[AA]SmaI	3311	7826011	4419	repeat	Alu	SINE	AluY
5230	1	7832068	7832141	74	SmaI[TT]-MseI	3312	7832067	5233306	shore	Unique	NULL	NULL
5233	1	7838942	7839179	238	MseI-[AA]SmaI	3314	7839179	4427	repeat	Alu	SINE	AluY
5243	1	7845934	7846239	306	MseI-[AA]SmaI	3322	7846239	4430	repeat	Alu	SINE	AluY
5245	1	7848611	7848888	278	MseI-[AA]SmaI	3323	7848888	4431	repeat	Alu	SINE	AluSq2
5258	1	7909368	7909587	220	SmaI[TT]-MseI	3329	7909367	4478	repeat	Alu	SINE	AluSq2
5260	1	7923265	7923483	219	SmaI[TT]-MseI	3330	7923264	4497	repeat	Alu	SINE	AluSp
5266	1	7927433	7927860	428	MseI-[AA]SmaI	3334	7927860	4500	repeat	Alu	SINE	AluSx1
5274	1	7949962	7950051	90	MseI-[AA]SmaI	3338	7950051	4516	repeat	Alu	SINE	AluY
5276	1	7955133	7955353	221	MseI-[AA]SmaI	3339	7955353	4525	repeat	Alu	SINE	AluSq2
5281	1	7963540	7963762	223	SmaI[TT]-MseI	3341	7963539	4535	repeat	Alu	SINE	AluSx
5282	1	7964667	7964888	222	MseI-[AA]SmaI	3342	7964888	4537	repeat	Alu	SINE	AluSx
5287	1	7977083	7977636	554	SmaI[TT]-MseI	3344	7977082	4556	repeat	Alu	SINE	AluSx
5288	1	7984402	7984611	210	MseI-[AA]SmaI	3345	7984611	4568	repeat	Alu	SINE	AluSx
5291	1	7990123	7990361	239	SmaI[TT]-[AA]SmaI	3346	7990122	4575	repeat	Alu	SINE	AluSq2
5293	1	7993509	7993679	171	MseI-[AA]SmaI	3348	7993679	4578	repeat	Alu	SINE	AluSx1
5295	1	8004275	8004534	260	MseI-[AA]SmaI	3349	8004534	4593	repeat	Alu	SINE	AluY
5302	1	8015181	8015419	239	SmaI[TT]-MseI	3352	8015180	4604	repeat	Alu	SINE	AluSq2
5306	1	8023537	8023750	214	SmaI[TT]-MseI	3354	8023536	4616	repeat	Alu	SINE	AluSx1
5309	1	8031697	8031917	221	MseI-[AA]SmaI	3356	8031917	4627	repeat	Alu	SINE	AluSq2
5311	1	8032671	8033034	364	MseI-[AA]SmaI	3357	8033034	4630	repeat	Alu	SINE	AluSz
5313	1	8033557	8033892	336	MseI-[AA]SmaI	3358	8033892	4632	repeat	Alu	SINE	AluSz
5316	1	8036874	8037658	785	SmaI[TT]-MseI	3359	8036873	4636	repeat	Alu	SINE	AluY
5320	1	8038546	8038723	178	SmaI[TT]-MseI	3362	8038545	4641	repeat	Alu	SINE	AluSx
5322	1	8042128	8042374	247	SmaI[TT]-MseI	3363	8042127	4650	repeat	Alu	SINE	AluSx1
5323	1	8048527	8048640	114	MseI-[AA]SmaI	3364	8048640	4656	repeat	Alu	SINE	AluSg4
5325	1	8052699	8052927	229	MseI-[AA]SmaI	3365	8052927	4659	repeat	Alu	SINE	AluSq2
5328	1	8055948	8056262	315	SmaI[TT]-MseI	3366	8055947	4665	repeat	Alu	SINE	AluY
5330	1	8068481	8068701	221	SmaI[TT]-MseI	3367	8068480	4681	repeat	Alu	SINE	AluSq
5331	1	8069332	8069589	258	MseI-[AA]SmaI	3368	8069589	4683	repeat	Alu	SINE	AluSp
5340	1	8089943	8090660	718	SmaI[TT]-MseI	3373	8089942	4690	repeat	Alu	SINE	AluSc
5341	1	8092693	8093092	400	MseI-[AA]SmaI	3374	8093092	4696	repeat	Alu	SINE	AluSq
5343	1	8105788	8106034	247	MseI-[AA]SmaI	3375	8106034	4711	repeat	Alu	SINE	AluSp
5346	1	8116620	8117261	642	SmaI[TT]-MseI	3376	8116619	4724	repeat	Alu	SINE	AluSx
5348	1	8118211	8118429	219	SmaI[TT]-MseI	3377	8118210	4725	repeat	Alu	SINE	AluSp
5352	1	8125991	8126210	220	SmaI[TT]-MseI	3379	8125990	4740	repeat	Alu	SINE	AluSp
5357	1	8134048	8134442	395	MseI-[AA]SmaI	3382	8134442	4754	repeat	Alu	SINE	AluSx
5360	1	8135420	8136210	791	SmaI[TT]-MseI	3383	8135419	4757	repeat	Alu	SINE	AluSx
5361	1	8139743	8139972	230	MseI-[AA]SmaI	3384	8139972	4762	repeat	Alu	SINE	AluY
5364	1	8148676	8148975	300	SmaI[TT]-MseI	3385	8148675	4772	repeat	Alu	SINE	AluSx
5367	1	8165986	8166208	223	MseI-[AA]SmaI	3387	8166208	4788	repeat	Alu	SINE	AluSx1
5369	1	8172135	8172358	224	MseI-[AA]SmaI	3388	8172358	4793	repeat	Alu	SINE	AluY
5373	1	8184823	8185323	501	MseI-[AA]SmaI	3390	8185323	4804	repeat	Alu	SINE	AluSx
5375	1	8188683	8188905	223	MseI-[AA]SmaI	3391	8188905	4808	repeat	Alu	SINE	AluSx
5378	1	8189437	8189659	223	SmaI[TT]-MseI	3392	8189436	4809	repeat	Alu	SINE	AluSx
5381	1	8196569	8197407	839	MseI-[AA]SmaI	3394	8197407	4819	repeat	Alu	SINE	AluY
5383	1	8199831	8200764	934	MseI-[AA]SmaI	3395	8200764	4823	repeat	Alu	SINE	AluSc8
5391	1	8211131	8211345	215	MseI-[AA]SmaI	3399	8211345	4838	repeat	Alu	SINE	AluSz
5395	1	8216401	8216690	290	MseI-[AA]SmaI	3401	8216690	4844	repeat	Alu	SINE	AluSx1
5398	1	8220244	8220422	179	SmaI[TT]-MseI	3402	8220243	4848	repeat	Alu	SINE	AluSp
5400	1	8220559	8220777	219	SmaI[TT]-MseI	3403	8220558	4849	repeat	Alu	SINE	AluSg7
5401	1	8222909	8223440	532	MseI-[AA]SmaI	3404	8223440	4852	repeat	Alu	SINE	AluSx
5404	1	8225260	8225998	739	SmaI[TT]-MseI	3405	8225259	4855	repeat	Alu	SINE	AluSc8
5407	1	8247519	8247738	220	SmaI[TT]-MseI	3407	8247518	4895	repeat	Alu	SINE	AluSx
5408	1	8247739	8247977	239	MseI-[AA]SmaI	3408	8247977	4896	repeat	Alu	SINE	AluSx
5410	1	8250438	8250657	220	MseI-[AA]SmaI	3409	8250657	4901	repeat	Alu	SINE	AluSx1
5412	1	8252064	8252511	448	MseI-[AA]SmaI	3410	8252511	4905	repeat	Alu	SINE	AluSg4
5418	1	8270813	8271042	230	MseI-[AA]SmaI	3413	8271042	4935	repeat	Alu	SINE	AluSg
5424	1	8277605	8277825	221	SmaI[TT]-MseI	3416	8277604	5233331	island	CpGi	NULL	NULL
5427	1	8285622	8285955	334	MseI-[AA]SmaI	3418	8285955	4955	repeat	Alu	SINE	AluSx1
5429	1	8289623	8290052	430	MseI-[AA]SmaI	3419	8290052	4959	repeat	Alu	SINE	AluSp
5436	1	8305351	8305891	541	MseI-[AA]SmaI	3424	8305891	4989	repeat	Alu	SINE	AluSx3
5440	1	8309218	8309604	387	MseI-[AA]SmaI	3426	8309604	4996	repeat	Alu	SINE	AluSx1
5443	1	8313276	8313500	225	SmaI[TT]-MseI	3427	8313275	5001	repeat	Alu	SINE	AluSp
5445	1	8315157	8316077	921	SmaI[TT]-MseI	3428	8315156	5005	repeat	Alu	SINE	AluY
5447	1	8316957	8317228	272	SmaI[TT]-MseI	3429	8316956	5008	repeat	Alu	SINE	AluSg
5451	1	8321872	8322037	166	SmaI[TT]-MseI	3431	8321871	5016	repeat	Alu	SINE	AluY
5457	1	8335368	8335587	220	SmaI[TT]-MseI	3434	8335367	5040	repeat	Alu	SINE	AluY
5463	1	8351557	8351775	219	SmaI[TT]-MseI	3437	8351556	5069	repeat	Alu	SINE	AluSg4
5465	1	8352822	8353294	473	SmaI[TT]-MseI	3438	8352821	5071	repeat	Alu	SINE	AluSz
5467	1	8359870	8360089	220	SmaI[TT]-MseI	3439	8359869	5077	repeat	Alu	SINE	AluSz
5475	1	8387794	8388015	222	MseI-[AA]SmaI	3444	8388015	5105	repeat	Alu	SINE	AluSx3
5480	1	8391946	8392162	217	SmaI[TT]-MseI	3446	8391945	5109	repeat	Alu	SINE	AluY
5482	1	8392665	8392885	221	SmaI[TT]-MseI	3447	8392664	5110	repeat	Alu	SINE	AluSx1
5489	1	8400316	8400529	214	SmaI[TT]-MseI	3451	8400315	5116	repeat	Alu	SINE	AluSx3
5490	1	8401696	8402191	496	MseI-[AA]SmaI	3452	8402191	5120	repeat	Alu	SINE	AluY
5506	1	8427587	8428458	872	MseI-[AA]SmaI	3460	8428458	5125	repeat	Alu	SINE	AluY
5509	1	8429943	8430161	219	SmaI[TT]-MseI	3461	8429942	5128	repeat	Alu	SINE	AluY
5510	1	8433507	8433625	119	MseI-[AA]SmaI	3462	8433625	NA	NULL	Unique	NULL	NULL
5516	1	8445570	8445953	384	MseI-[AA]SmaI	3465	8445953	5134	repeat	Alu	SINE	AluY
5519	1	8448473	8448693	221	SmaI[TT]-MseI	3466	8448472	5135	repeat	Alu	SINE	AluYb8
5520	1	8455080	8455459	380	MseI-[AA]SmaI	3467	8455459	5139	repeat	Alu	SINE	AluSx3
5522	1	8461354	8461426	73	MseI-[AA]SmaI	3468	8461426	5145	repeat	Alu	SINE	AluSx
5527	1	8463052	8463272	221	SmaI[TT]-MseI	3470	8463051	5148	repeat	Alu	SINE	AluSg
5528	1	8473709	8474039	331	MseI-[AA]SmaI	3471	8474039	5158	repeat	Alu	SINE	AluSp
5535	1	8486070	8486438	369	MseI-[AA]SmaI	3476	8486438	5164	repeat	Alu	SINE	AluY
5538	1	8493714	8494158	445	SmaI[TT]-MseI	3477	8493713	5168	repeat	Alu	SINE	AluYb8
5539	1	8496082	8496303	222	MseI-[AA]SmaI	3478	8496303	5170	repeat	Alu	SINE	AluSg
5541	1	8499833	8500058	226	MseI-[AA]SmaI	3479	8500058	5173	repeat	Alu	SINE	AluSq2
5543	1	8508717	8508813	97	MseI-[AA]SmaI	3480	8508813	5179	repeat	Alu	SINE	AluSg
5545	1	8513516	8513790	275	MseI-[AA]SmaI	3481	8513790	5181	repeat	Alu	SINE	AluSz
5552	1	8540293	8540807	515	SmaI[TT]-MseI	3484	8540292	5204	repeat	Alu	SINE	AluSg
5554	1	8548399	8548612	214	SmaI[TT]-MseI	3485	8548398	5214	repeat	Alu	SINE	AluSq2
5555	1	8549721	8550034	314	MseI-[AA]SmaI	3486	8550034	5216	repeat	Alu	SINE	AluY
5559	1	8558453	8558680	228	MseI-[AA]SmaI	3488	8558680	5232	repeat	Alu	SINE	AluSx
5561	1	8564488	8564836	349	MseI-[AA]SmaI	3489	8564836	5234	repeat	Alu	SINE	AluSx3
5564	1	8572186	8572403	218	SmaI[TT]-MseI	3490	8572185	5242	repeat	Alu	SINE	AluYb8
5565	1	8574492	8574711	220	MseI-[AA]SmaI	3491	8574711	5244	repeat	Alu	SINE	AluSq
5568	1	8590844	8591222	379	SmaI[TT]-MseI	3492	8590843	5260	repeat	Alu	SINE	AluYb8
5573	1	8595682	8596089	408	MseI-[AA]SmaI	3495	8596089	5266	repeat	Alu	SINE	AluSc
5578	1	8605836	8606424	589	SmaI[TT]-MseI	3497	8605835	5273	repeat	Alu	SINE	AluSc8
5583	1	8636726	8637152	427	MseI-[AA]SmaI	3500	8637152	5299	repeat	Alu	SINE	AluY
5585	1	8653767	8654009	243	MseI-[AA]SmaI	3501	8654009	NA	NULL	Unique	NULL	NULL
5587	1	8668851	8669201	351	MseI-[AA]SmaI	3502	8669201	5330	repeat	Alu	SINE	AluSx
5591	1	8670349	8670572	224	MseI-[AA]SmaI	3504	8670572	5332	repeat	Alu	SINE	AluSg
5593	1	8670953	8671178	226	MseI-[AA]SmaI	3505	8671178	5334	repeat	Alu	SINE	AluSc8
5599	1	8713397	8713678	282	MseI-[AA]SmaI	3508	8713678	5366	repeat	Alu	SINE	AluYc
5608	1	8746359	8746733	375	MseI-[AA]SmaI	3513	8746733	5395	repeat	Alu	SINE	AluSq2
5612	1	8760067	8760288	222	MseI-[AA]SmaI	3515	8760288	5410	repeat	Alu	SINE	AluSg
5620	1	8773501	8773717	217	MseI-[AA]SmaI	3520	8773717	5419	repeat	Alu	SINE	AluSq
5622	1	8784608	8784812	205	MseI-[AA]SmaI	3521	8784812	5430	repeat	Alu	SINE	AluSg
5624	1	8785463	8785549	87	MseI-[AA]SmaI	3522	8785549	5431	repeat	Alu	SINE	AluSx1
5627	1	8787646	8787779	134	SmaI[TT]-MseI	3523	8787645	5435	repeat	Alu	SINE	AluSc
5628	1	8788601	8789147	547	MseI-[AA]SmaI	3524	8789147	5436	repeat	Alu	SINE	AluSp
5631	1	8790495	8790936	442	SmaI[TT]-MseI	3525	8790494	5439	repeat	Alu	SINE	AluSx
5633	1	8792974	8793225	252	SmaI[TT]-MseI	3526	8792973	5443	repeat	Alu	SINE	AluY
5637	1	8807927	8808154	228	SmaI[TT]-MseI	3528	8807926	5456	repeat	Alu	SINE	AluSz
5643	1	8820178	8820402	225	SmaI[TT]-MseI	3531	8820177	5468	repeat	Alu	SINE	AluSq
5646	1	8831120	8831893	774	MseI-[AA]SmaI	3533	8831893	5484	repeat	Alu	SINE	AluY
5649	1	8835113	8835642	530	SmaI[TT]-MseI	3534	8835112	5490	repeat	Alu	SINE	AluSc
5652	1	8842652	8842889	238	MseI-[AA]SmaI	3536	8842889	5507	repeat	Alu	SINE	AluSx1
5655	1	8845774	8845998	225	SmaI[TT]-MseI	3537	8845773	5510	repeat	Alu	SINE	AluSq2
5659	1	8855180	8856099	920	SmaI[TT]-MseI	3539	8855179	5523	repeat	Alu	SINE	AluSg
5661	1	8858844	8859083	240	SmaI[TT]-MseI	3540	8858843	5529	repeat	Alu	SINE	AluSx
5663	1	8859146	8859472	327	SmaI[TT]-MseI	3541	8859145	5530	repeat	Alu	SINE	AluSq2
5664	1	8863271	8863453	183	MseI-[AA]SmaI	3542	8863453	5538	repeat	Alu	SINE	AluSc
5667	1	8866004	8866631	628	SmaI[TT]-MseI	3543	8866003	5544	repeat	Alu	SINE	AluSq2
5668	1	8868895	8869121	227	MseI-[AA]SmaI	3544	8869121	5549	repeat	Alu	SINE	AluY
5671	1	8870158	8870370	213	SmaI[TT]-MseI	3545	8870157	5550	repeat	Alu	SINE	AluSx1
5681	1	8883588	8883879	292	MseI-[AA]SmaI	3552	8883879	5563	repeat	Alu	SINE	AluSx1
5685	1	8885443	8885772	330	MseI-[AA]SmaI	3554	8885772	5568	repeat	Alu	SINE	AluSq2
5687	1	8889955	8890473	519	MseI-[AA]SmaI	3555	8890473	5578	repeat	Alu	SINE	AluSq2
5689	1	8890616	8891000	385	MseI-[AA]SmaI	3556	8891000	5579	repeat	Alu	SINE	AluSz6
5699	1	8906827	8907641	815	SmaI[TT]-MseI	3561	8906826	5610	repeat	Alu	SINE	AluSx
5703	1	8909834	8910053	220	SmaI[TT]-MseI	3563	8909833	5614	repeat	Alu	SINE	AluSx
5704	1	8913340	8913582	243	MseI-[AA]SmaI	3564	8913582	5622	repeat	Alu	SINE	AluYk4
5712	1	8936656	8936781	126	MseI-[AA]SmaI	3568	8936781	5652	repeat	Alu	SINE	AluYc
5721	1	8941146	8941368	223	MseI-[AA]SmaI	3574	8941368	5657	repeat	Alu	SINE	AluSg
5723	1	8942167	8942326	160	MseI-[AA]SmaI	3575	8942326	5660	repeat	Alu	SINE	AluSx
5726	1	8943248	8943465	218	SmaI[TT]-MseI	3576	8943247	5663	repeat	Alu	SINE	AluSc8
5735	1	8955543	8955747	205	MseI-[AA]SmaI	3581	8955747	5685	repeat	Alu	SINE	AluSc8
5739	1	8961405	8961794	390	SmaI[TT]-MseI	3583	8961404	5692	repeat	Alu	SINE	AluSq2
5740	1	8963289	8963507	219	MseI-[AA]SmaI	3584	8963507	5695	repeat	Alu	SINE	AluSz
5744	1	8967060	8967281	222	SmaI[TT]-MseI	3586	8967059	5701	repeat	Alu	SINE	AluYa5
5746	1	8969534	8969801	268	SmaI[TT]-MseI	3587	8969533	5704	repeat	Alu	SINE	AluSc
5750	1	8974253	8974338	86	SmaI[TT]-MseI	3589	8974252	5709	repeat	Alu	SINE	AluSx
5751	1	8981232	8981307	76	MseI-[AA]SmaI	3590	8981307	3255772	repeat	ERV	LTR	HERVFH21-int
5756	1	8988102	8988369	268	SmaI[TT]-MseI	3592	8988101	5726	repeat	Alu	SINE	AluY
5763	1	9000821	9001142	322	MseI-[AA]SmaI	3596	9001142	5750	repeat	Alu	SINE	AluSq
5766	1	9006190	9006520	331	SmaI[TT]-MseI	3597	9006189	5759	repeat	Alu	SINE	AluSx1
5768	1	9012809	9013235	427	SmaI[TT]-MseI	3598	9012808	5771	repeat	Alu	SINE	AluSz
5771	1	9019272	9019915	644	MseI-[AA]SmaI	3600	9019915	5782	repeat	Alu	SINE	AluSx1
5774	1	9024400	9024630	231	SmaI[TT]-MseI	3601	9024399	5786	repeat	Alu	SINE	AluSc
5777	1	9025652	9025870	219	MseI-[AA]SmaI	3603	9025870	5788	repeat	Alu	SINE	AluSx1
5779	1	9029852	9030189	338	MseI-[AA]SmaI	3604	9030189	5795	repeat	Alu	SINE	AluSx1
5782	1	9031464	9031548	85	SmaI[TT]-MseI	3605	9031463	5797	repeat	Alu	SINE	AluSx1
5783	1	9032442	9032666	225	MseI-[AA]SmaI	3606	9032666	5799	repeat	Alu	SINE	AluY
5785	1	9038400	9038620	221	MseI-[AA]SmaI	3607	9038620	5808	repeat	Alu	SINE	AluY
5787	1	9042532	9043093	562	MseI-[AA]SmaI	3608	9043093	5813	repeat	Alu	SINE	AluSc
5791	1	9047375	9047599	225	MseI-[AA]SmaI	3610	9047599	5821	repeat	Alu	SINE	AluSz
5795	1	9055216	9055431	216	MseI-[AA]SmaI	3612	9055431	5831	repeat	Alu	SINE	AluY
5802	1	9067891	9068834	944	SmaI[TT]-MseI	3615	9067890	5849	repeat	Alu	SINE	AluSx3
5809	1	9076929	9077303	375	MseI-[AA]SmaI	3620	9077303	5860	repeat	Alu	SINE	AluSx
5814	1	9081162	9082094	933	SmaI[TT]-MseI	3622	9081161	5864	repeat	Alu	SINE	AluSz
5816	1	9084008	9084281	274	SmaI[TT]-MseI	3623	9084007	5868	repeat	Alu	SINE	AluSx1
5818	1	9087047	9087406	360	SmaI[TT]-MseI	3624	9087046	5871	repeat	Alu	SINE	AluY
5821	1	9096492	9096824	333	MseI-[AA]SmaI	3626	9096824	5884	repeat	Alu	SINE	AluY
5828	1	9105544	9105853	310	MseI-[AA]SmaI	3630	9105853	5892	repeat	Alu	SINE	AluSq2
5830	1	9113645	9113857	213	MseI-[AA]SmaI	3631	9113857	5903	repeat	Alu	SINE	AluSx1
5832	1	9115277	9115500	224	MseI-[AA]SmaI	3632	9115500	5906	repeat	Alu	SINE	AluSx3
5837	1	9123848	9124261	414	SmaI[TT]-MseI	3634	9123847	5922	repeat	Alu	SINE	AluY
5838	1	9124648	9125036	389	MseI-[AA]SmaI	3635	9125036	5924	repeat	Alu	SINE	AluSg
5840	1	9131097	9131393	297	MseI-[AA]SmaI	3636	9131393	5937	repeat	Alu	SINE	AluSx1
5850	1	9136942	9137160	219	SmaI[TT]-MseI	3644	9136941	5944	repeat	Alu	SINE	AluSq
5854	1	9147357	9147577	221	SmaI[TT]-MseI	3646	9147356	5956	repeat	Alu	SINE	AluY
5855	1	9147578	9147604	27	MseI-[AA]SmaI	3647	9147604	3255892	repeat	ERV	LTR	HERVFH19-int
5858	1	9159577	9159606	30	SmaI[TT]-MseI	3648	9159576	5963	repeat	Alu	SINE	AluSx
5861	1	9167543	9167911	369	MseI-[AA]SmaI	3650	9167911	5975	repeat	Alu	SINE	AluSz6
5864	1	9168938	9169442	505	SmaI[TT]-MseI	3651	9168937	5978	repeat	Alu	SINE	AluY
5865	1	9177226	9177745	520	MseI-[AA]SmaI	3652	9177745	5992	repeat	Alu	SINE	AluSx1
5876	1	9191387	9192262	876	SmaI[TT]-MseI	3658	9191386	6006	repeat	Alu	SINE	AluSq
5884	1	9218691	9218970	280	MseI-[AA]SmaI	3663	9218970	6050	repeat	Alu	SINE	AluSx
5891	1	9229458	9229582	125	SmaI[TT]-MseI	3666	9229457	6064	repeat	Alu	SINE	AluSx
5913	1	9266945	9267160	216	SmaI[TT]-MseI	3681	9266944	6106	repeat	Alu	SINE	AluSp
5920	1	9275972	9276200	229	MseI-[AA]SmaI	3685	9276200	6119	repeat	Alu	SINE	AluSx
5923	1	9278536	9278977	442	SmaI[TT]-MseI	3686	9278535	6123	repeat	Alu	SINE	AluY
5925	1	9283959	9284439	481	SmaI[TT]-MseI	3687	9283958	6133	repeat	Alu	SINE	AluY
5943	1	9312768	9313034	267	MseI-[AA]SmaI	3699	9313034	1773510	repeat	Rest	LINE	CR1_Mam
5948	1	9326973	9327946	974	SmaI[TT]-MseI	3701	9326972	6178	repeat	Alu	SINE	AluSx1
5957	1	9351338	9351649	312	SmaI[TT]-MseI	3706	9351337	6198	repeat	Alu	SINE	AluY
6012	1	9419598	9419685	88	MseI-[AA]SmaI	3740	9419685	6244	repeat	Alu	SINE	AluSg
6028	1	9437905	9438120	216	SmaI[TT]-MseI	3749	9437904	6262	repeat	Alu	SINE	AluSz6
6029	1	9439984	9440181	198	MseI-[AA]SmaI	3750	9440181	6266	repeat	Alu	SINE	AluSx1
6038	1	9456014	9456235	222	MseI-[AA]SmaI	3755	9456235	6286	repeat	Alu	SINE	AluSz
6042	1	9467417	9468276	860	MseI-[AA]SmaI	3757	9468276	6304	repeat	Alu	SINE	AluSg
6044	1	9468766	9469089	324	SmaI[TT]-MseI	3758	9468765	6305	repeat	Alu	SINE	AluSx
6045	1	9469090	9469619	530	MseI-[AA]SmaI	3759	9469619	6307	repeat	Alu	SINE	AluSx
6047	1	9472283	9472494	212	MseI-[AA]SmaI	3760	9472494	6313	repeat	Alu	SINE	AluSg
6055	1	9480191	9480425	235	SmaI[TT]-MseI	3764	9480190	6323	repeat	Alu	SINE	AluSx
6056	1	9480426	9480899	474	MseI-[AA]SmaI	3765	9480899	6324	repeat	Alu	SINE	AluY
6066	1	9487787	9487927	141	MseI-[AA]SmaI	3771	9487927	6334	repeat	Alu	SINE	AluSx3
6069	1	9488207	9488871	665	SmaI[TT]-MseI	3772	9488206	6335	repeat	Alu	SINE	AluSz
6071	1	9490917	9491195	279	SmaI[TT]-MseI	3773	9490916	6336	repeat	Alu	SINE	AluSx1
6072	1	9503581	9503802	222	MseI-[AA]SmaI	3774	9503802	6352	repeat	Alu	SINE	AluSx1
6084	1	9525365	9525571	207	SmaI[TT]-MseI	3780	9525364	6377	repeat	Alu	SINE	AluSx
6095	1	9548234	9548450	217	SmaI[TT]-MseI	3786	9548233	6408	repeat	Alu	SINE	AluSx3
6098	1	9552547	9552631	85	MseI-[AA]SmaI	3788	9552631	6416	repeat	Alu	SINE	AluYc
6100	1	9552808	9553026	219	MseI-[AA]SmaI	3789	9553026	6417	repeat	Alu	SINE	AluSq2
6107	1	9559094	9559599	506	MseI-[AA]SmaI	3793	9559599	6429	repeat	Alu	SINE	AluSp
6111	1	9562131	9562244	114	MseI-[AA]SmaI	3795	9562244	6434	repeat	Alu	SINE	AluSx
6118	1	9566367	9566960	594	MseI-[AA]SmaI	3799	9566960	6441	repeat	Alu	SINE	AluSx1
6123	1	9572051	9572392	342	SmaI[TT]-MseI	3801	9572050	6450	repeat	Alu	SINE	AluY
6124	1	9573554	9574069	516	MseI-[AA]SmaI	3802	9574069	6454	repeat	Alu	SINE	AluSg
6128	1	9576926	9577246	321	SmaI[TT]-MseI	3804	9576925	6460	repeat	Alu	SINE	AluYa5
6129	1	9581784	9582518	735	MseI-[AA]SmaI	3805	9582518	6469	repeat	Alu	SINE	AluSx1
6134	1	9583726	9583987	262	SmaI[TT]-MseI	3807	9583725	6472	repeat	Alu	SINE	AluY
6139	1	9593953	9594329	377	SmaI[TT]-MseI	3810	9593952	6501	repeat	Alu	SINE	AluY
6140	1	9597421	9597635	215	MseI-[AA]SmaI	3811	9597635	6511	repeat	Alu	SINE	AluSg
6149	1	9601306	9601688	383	SmaI[TT]-MseI	3816	9601305	6516	repeat	Alu	SINE	AluY
6151	1	9602964	9603339	376	SmaI[TT]-MseI	3817	9602963	6519	repeat	Alu	SINE	AluSz6
6153	1	9604420	9604693	274	SmaI[TT]-MseI	3818	9604419	6522	repeat	Alu	SINE	AluSx
6154	1	9605772	9605945	174	MseI-[AA]SmaI	3819	9605945	6526	repeat	Alu	SINE	AluSz
6157	1	9606336	9606610	275	SmaI[TT]-MseI	3820	9606335	6527	repeat	Alu	SINE	AluY
6160	1	9622011	9622035	25	MseI-[AA]SmaI	3822	9622035	6550	repeat	Alu	SINE	AluSc
6164	1	9628586	9628833	248	MseI-[AA]SmaI	3824	9628833	6564	repeat	Alu	SINE	AluY
6169	1	9632375	9632600	226	MseI-[AA]SmaI	3827	9632600	6569	repeat	Alu	SINE	AluY
6174	1	9637110	9637413	304	MseI-[AA]SmaI	3830	9637413	6575	repeat	Alu	SINE	AluSz
6180	1	9640582	9640838	257	MseI-[AA]SmaI	3833	9640838	6578	repeat	Alu	SINE	AluSc
6188	1	9649746	9650051	306	SmaI[TT]-MseI	3838	9649745	5233411	shore	Unique	NULL	NULL
6197	1	9659774	9659968	195	SmaI[TT]-MseI	3843	9659773	6602	repeat	Alu	SINE	AluYc
6213	1	9680779	9681389	611	SmaI[TT]-MseI	3852	9680778	6624	repeat	Alu	SINE	AluSx
6215	1	9682967	9683189	223	SmaI[TT]-MseI	3853	9682966	6627	repeat	Alu	SINE	AluY
6216	1	9683268	9683542	275	MseI-[AA]SmaI	3854	9683542	6628	repeat	Alu	SINE	AluYa5
6227	1	9697573	9698089	517	MseI-[AA]SmaI	3861	9698089	6653	repeat	Alu	SINE	AluSx1
6230	1	9699881	9700241	361	SmaI[TT]-MseI	3863	9699880	6656	repeat	Alu	SINE	AluSx1
6234	1	9702264	9702485	222	SmaI[TT]-MseI	3865	9702263	6659	repeat	Alu	SINE	AluSx
6235	1	9702486	9702699	214	MseI-[AA]SmaI	3866	9702699	6660	repeat	Alu	SINE	AluYk4
6237	1	9709012	9709084	73	MseI-[AA]SmaI	3867	9709084	6674	repeat	Alu	SINE	AluSx
6249	1	9721086	9721615	530	SmaI[TT]-MseI	3874	9721085	6692	repeat	Alu	SINE	AluSz
6251	1	9724200	9724450	251	SmaI[TT]-MseI	3875	9724199	6700	repeat	Alu	SINE	AluSx
6253	1	9726856	9727233	378	SmaI[TT]-MseI	3876	9726855	6707	repeat	Alu	SINE	AluSz6
6255	1	9727528	9727771	244	SmaI[TT]-MseI	3877	9727527	6710	repeat	Alu	SINE	AluSc8
6263	1	9736083	9736834	752	SmaI[TT]-MseI	3881	9736082	6734	repeat	Alu	SINE	AluSq2
6267	1	9739976	9740109	134	SmaI[TT]-MseI	3883	9739975	6741	repeat	Alu	SINE	AluSq2
6272	1	9742908	9743420	513	MseI-[AA]SmaI	3886	9743420	6750	repeat	Alu	SINE	AluY
6284	1	9753376	9753606	231	SmaI[TT]-MseI	3894	9753375	6764	repeat	Alu	SINE	AluSz
6285	1	9755428	9755824	397	MseI-[AA]SmaI	3895	9755824	6767	repeat	Alu	SINE	AluSg
6288	1	9770937	9771411	475	SmaI[TT]-MseI	3896	9770936	6794	repeat	Alu	SINE	AluSp
6293	1	9782804	9783347	544	MseI-[AA]SmaI	3899	9783347	NA	NULL	Unique	NULL	NULL
6296	1	9790022	9790072	51	SmaI[TT]-MseI	3900	9790021	5233428	shore	Unique	NULL	NULL
6301	1	9801114	9801894	781	MseI-[AA]SmaI	3903	9801894	6824	repeat	Alu	SINE	AluSz6
6303	1	9802696	9802890	195	MseI-[AA]SmaI	3904	9802890	6825	repeat	Alu	SINE	AluSx
6306	1	9804905	9804965	61	SmaI[TT]-MseI	3905	9804904	6828	repeat	Alu	SINE	AluSg
6307	1	9805182	9805211	30	MseI-[AA]SmaI	3906	9805211	6829	repeat	Alu	SINE	AluYc
6311	1	9810814	9811047	234	MseI-[AA]SmaI	3908	9811047	6843	repeat	Alu	SINE	AluSx1
6314	1	9818145	9818802	658	SmaI[TT]-MseI	3909	9818144	6853	repeat	Alu	SINE	AluSp
6316	1	9819427	9819694	268	SmaI[TT]-MseI	3910	9819426	6856	repeat	Alu	SINE	AluY
6318	1	9820740	9821255	516	SmaI[TT]-MseI	3911	9820739	6858	repeat	Alu	SINE	AluJb
6319	1	9821593	9822443	851	MseI-[AA]SmaI	3912	9822443	6860	repeat	Alu	SINE	AluSx1
6321	1	9825156	9825612	457	MseI-[AA]SmaI	3913	9825612	NA	NULL	Unique	NULL	NULL
6324	1	9829802	9830012	211	MseI-[AA]SmaI	3915	9830012	6872	repeat	Alu	SINE	AluYc
6326	1	9831409	9831596	188	MseI-[AA]SmaI	3916	9831596	6876	repeat	Alu	SINE	AluSg7
6332	1	9839335	9839539	205	MseI-[AA]SmaI	3919	9839539	6889	repeat	Alu	SINE	AluSq2
6335	1	9841595	9841813	219	SmaI[TT]-MseI	3920	9841594	6892	repeat	Alu	SINE	AluSp
6343	1	9847853	9848850	998	MseI-[AA]SmaI	3925	9848850	6907	repeat	Alu	SINE	AluY
6345	1	9850896	9851114	219	MseI-[AA]SmaI	3926	9851114	6909	repeat	Alu	SINE	AluY
6347	1	9859404	9859623	220	MseI-[AA]SmaI	3927	9859623	6923	repeat	Alu	SINE	AluY
6350	1	9864128	9864345	218	MseI-[AA]SmaI	3929	9864345	6933	repeat	Alu	SINE	AluSc
6357	1	9878938	9879177	240	SmaI[TT]-MseI	3932	9878937	6958	repeat	Alu	SINE	AluY
6358	1	9880288	9880501	214	MseI-[AA]SmaI	3933	9880501	6960	repeat	Alu	SINE	AluSz
6375	1	9889954	9890361	408	SmaI[TT]-MseI	3945	9889953	6973	repeat	Alu	SINE	AluSg
6376	1	9892973	9893060	88	MseI-[AA]SmaI	3946	9893060	6983	repeat	Alu	SINE	AluSx1
6380	1	9898107	9898316	210	MseI-[AA]SmaI	3948	9898316	6993	repeat	Alu	SINE	AluSx1
6385	1	9911522	9911743	222	SmaI[TT]-MseI	3950	9911521	7005	repeat	Alu	SINE	AluSx3
6386	1	9916885	9917104	220	MseI-[AA]SmaI	3951	9917104	7012	repeat	Alu	SINE	AluSx
6393	1	9924480	9924986	507	SmaI[TT]-MseI	3955	9924479	7019	repeat	Alu	SINE	AluY
6394	1	9925374	9925586	213	MseI-[AA]SmaI	3956	9925586	7021	repeat	Alu	SINE	AluY
6409	1	9945285	9945389	105	SmaI[TT]-MseI	3964	9945284	1773772	repeat	LINE	LINE	L2c
6411	1	9947976	9948184	209	SmaI[TT]-MseI	3965	9947975	7043	repeat	Alu	SINE	AluSx1
6412	1	9952179	9952404	226	MseI-[AA]SmaI	3966	9952404	7049	repeat	Alu	SINE	AluY
6416	1	9955647	9955867	221	SmaI[TT]-MseI	3968	9955646	7056	repeat	Alu	SINE	AluSx3
6417	1	9956770	9956949	180	MseI-[AA]SmaI	3969	9956949	7060	repeat	Alu	SINE	AluSx4
6419	1	9959216	9959741	526	MseI-[AA]SmaI	3970	9959741	7068	repeat	Alu	SINE	AluSc
6422	1	9965574	9965876	303	SmaI[TT]-MseI	3971	9965573	7074	repeat	Alu	SINE	AluY
6424	1	9968525	9968832	308	SmaI[TT]-MseI	3972	9968524	7080	repeat	Alu	SINE	AluYc3
6430	1	9971581	9971800	220	SmaI[TT]-MseI	3976	9971580	7081	repeat	Alu	SINE	AluSz
6431	1	9971801	9972019	219	MseI-[AA]SmaI	3977	9972019	7082	repeat	Alu	SINE	AluSp
6433	1	9979041	9979338	298	MseI-[AA]SmaI	3978	9979338	7093	repeat	Alu	SINE	AluY
6438	1	9984506	9984787	282	SmaI[TT]-MseI	3980	9984505	7107	repeat	Alu	SINE	AluSc8
6440	1	9986045	9986250	206	SmaI[TT]-MseI	3981	9986044	7111	repeat	Alu	SINE	AluY
6441	1	9992989	9993237	249	MseI-[AA]SmaI	3982	9993237	7125	repeat	Alu	SINE	AluY
6444	1	10000328	10000676	349	SmaI[TT]-MseI	3983	10000327	7146	repeat	Alu	SINE	AluY
6448	1	10010242	10010732	491	SmaI[TT]-MseI	3985	10010241	7164	repeat	Alu	SINE	AluSx1
6450	1	10013592	10013812	221	SmaI[TT]-MseI	3986	10013591	7171	repeat	Alu	SINE	AluSx
6454	1	10017472	10017664	193	SmaI[TT]-MseI	3988	10017471	7183	repeat	Alu	SINE	AluSg
6455	1	10019165	10019354	190	MseI-[AA]SmaI	3989	10019354	7186	repeat	Alu	SINE	AluSq2
6457	1	10021693	10022464	772	MseI-[AA]SmaI	3990	10022464	7191	repeat	Alu	SINE	AluY
6460	1	10022833	10023053	221	SmaI[TT]-MseI	3991	10022832	7193	repeat	Alu	SINE	AluY
6462	1	10023561	10023837	277	SmaI[TT]-MseI	3992	10023560	7195	repeat	Alu	SINE	AluSg
6463	1	10032272	10032478	207	MseI-[AA]SmaI	3993	10032478	7216	repeat	Alu	SINE	AluSc
6469	1	10037058	10037282	225	SmaI[TT]-MseI	3996	10037057	7228	repeat	Alu	SINE	AluSq2
6470	1	10037631	10038338	708	MseI-[AA]SmaI	3997	10038338	7231	repeat	Alu	SINE	AluSx
6472	1	10042865	10043337	473	MseI-[AA]SmaI	3998	10043337	7243	repeat	Alu	SINE	AluSx3
6475	1	10044199	10044610	412	SmaI[TT]-MseI	3999	10044198	7245	repeat	Alu	SINE	AluSx1
6477	1	10050335	10050374	40	SmaI[TT]-MseI	4000	10050334	3256434	repeat	ERV	LTR	MLT1L
6479	1	10051337	10052040	704	SmaI[TT]-MseI	4001	10051336	7259	repeat	Alu	SINE	AluSz
6493	1	10061980	10062050	71	SmaI[TT]-MseI	4010	10061979	7281	repeat	Alu	SINE	AluSx
6495	1	10063907	10064401	495	SmaI[TT]-MseI	4011	10063906	7284	repeat	Alu	SINE	AluSx1
6496	1	10066413	10066676	264	MseI-[AA]SmaI	4012	10066676	7292	repeat	Alu	SINE	AluSz6
6498	1	10067749	10068032	284	MseI-[AA]SmaI	4013	10068032	7295	repeat	Alu	SINE	AluSx1
6501	1	10070736	10071194	459	SmaI[TT]-MseI	4014	10070735	7304	repeat	Alu	SINE	AluSp
6502	1	10072109	10072363	255	MseI-[AA]SmaI	4015	10072363	7308	repeat	Alu	SINE	AluSx
6507	1	10077346	10077654	309	SmaI[TT]-MseI	4017	10077345	7321	repeat	Alu	SINE	AluY
6508	1	10080535	10080785	251	MseI-[AA]SmaI	4018	10080785	7328	repeat	Alu	SINE	AluSq2
6515	1	10083235	10083454	220	SmaI[TT]-MseI	4021	10083234	7334	repeat	Alu	SINE	AluSc8
6517	1	10084073	10084293	221	SmaI[TT]-MseI	4022	10084072	7337	repeat	Alu	SINE	AluSp
6519	1	10086422	10087133	712	SmaI[TT]-MseI	4023	10086421	7343	repeat	Alu	SINE	AluY
6523	1	10091242	10091355	114	SmaI[TT]-MseI	4025	10091241	7353	repeat	Alu	SINE	AluSg7
6527	1	10092039	10092390	352	SmaI[TT]-MseI	4027	10092038	7354	repeat	Alu	SINE	AluY
6533	1	10095150	10095371	222	SmaI[TT]-MseI	4031	10095149	7355	repeat	Alu	SINE	AluY
6536	1	10095895	10096167	273	SmaI[TT]-MseI	4033	10095894	7357	repeat	Alu	SINE	AluY
6538	1	10097179	10097396	218	SmaI[TT]-MseI	4034	10097178	7359	repeat	Alu	SINE	AluSp
6539	1	10097926	10098262	337	MseI-[AA]SmaI	4035	10098262	7361	repeat	Alu	SINE	AluSp
6544	1	10099581	10099836	256	SmaI[TT]-MseI	4037	10099580	7364	repeat	Alu	SINE	AluSz
6545	1	10101773	10102629	857	MseI-[AA]SmaI	4038	10102629	7372	repeat	Alu	SINE	AluSg
6550	1	10124915	10125093	179	SmaI[TT]-MseI	4040	10124914	7405	repeat	Alu	SINE	AluSx1
6551	1	10126615	10126888	274	MseI-[AA]SmaI	4041	10126888	7407	repeat	Alu	SINE	AluSx1
6554	1	10128501	10128857	357	SmaI[TT]-MseI	4042	10128500	7411	repeat	Alu	SINE	AluSx
6560	1	10138161	10138386	226	SmaI[TT]-MseI	4045	10138160	7423	repeat	Alu	SINE	AluSx
6564	1	10148527	10148955	429	SmaI[TT]-MseI	4047	10148526	7438	repeat	Alu	SINE	AluSx1
6566	1	10154585	10154795	211	SmaI[TT]-MseI	4048	10154584	7453	repeat	Alu	SINE	AluSc8
6570	1	10160141	10160358	218	SmaI[TT]-MseI	4050	10160140	7461	repeat	Alu	SINE	AluY
6575	1	10180609	10180820	212	MseI-[AA]SmaI	4053	10180820	7489	repeat	Alu	SINE	AluSx
6577	1	10181071	10181337	267	MseI-[AA]SmaI	4054	10181337	7490	repeat	Alu	SINE	AluSx1
6580	1	10183925	10184218	294	SmaI[TT]-MseI	4055	10183924	7493	repeat	Alu	SINE	AluSq2
6583	1	10194224	10194494	271	MseI-[AA]SmaI	4057	10194494	7507	repeat	Alu	SINE	AluSq
6585	1	10199116	10199373	258	MseI-[AA]SmaI	4058	10199373	7517	repeat	Alu	SINE	AluSx
6587	1	10202403	10203384	982	MseI-[AA]SmaI	4059	10203384	7521	repeat	Alu	SINE	AluSx1
6589	1	10206791	10207475	685	MseI-[AA]SmaI	4060	10207475	7525	repeat	Alu	SINE	AluSx1
6591	1	10212171	10212241	71	MseI-[AA]SmaI	4061	10212241	7533	repeat	Alu	SINE	AluSx3
6593	1	10213409	10214225	817	MseI-[AA]SmaI	4062	10214225	7539	repeat	Alu	SINE	AluSx
6599	1	10218920	10218992	73	MseI-[AA]SmaI	4066	10218992	7549	repeat	Alu	SINE	AluSz
6603	1	10223431	10223650	220	MseI-[AA]SmaI	4068	10223650	7556	repeat	Alu	SINE	AluSc
6605	1	10226548	10226907	360	MseI-[AA]SmaI	4069	10226907	7561	repeat	Alu	SINE	AluSx
6607	1	10227982	10228342	361	MseI-[AA]SmaI	4070	10228342	NA	NULL	Unique	NULL	NULL
6610	1	10234159	10234375	217	MseI-[AA]SmaI	4072	10234375	7572	repeat	Alu	SINE	AluSg4
6612	1	10244165	10244552	388	MseI-[AA]SmaI	4073	10244552	7586	repeat	Alu	SINE	AluSx1
6616	1	10251791	10252178	388	MseI-[AA]SmaI	4075	10252178	7597	repeat	Alu	SINE	AluYk4
6619	1	10252980	10253334	355	SmaI[TT]-MseI	4076	10252979	7599	repeat	Alu	SINE	AluSx
6620	1	10253335	10253924	590	MseI-[AA]SmaI	4077	10253924	7601	repeat	Alu	SINE	AluSz
6623	1	10259669	10259957	289	SmaI[TT]-MseI	4078	10259668	7617	repeat	Alu	SINE	AluY
6624	1	10259958	10260166	209	MseI-[AA]SmaI	4079	10260166	7619	repeat	Alu	SINE	AluSc8
6626	1	10260367	10261137	771	MseI-[AA]SmaI	4080	10261137	7623	repeat	Alu	SINE	AluSx
6628	1	10265208	10265448	241	MseI-[AA]SmaI	4081	10265448	7631	repeat	Alu	SINE	AluSx3
6631	1	10265817	10266529	713	SmaI[TT]-MseI	4082	10265816	7633	repeat	Alu	SINE	AluSp
6633	1	10268508	10268882	375	SmaI[TT]-MseI	4083	10268507	7640	repeat	Alu	SINE	AluSz6
6639	1	10274441	10274971	531	SmaI[TT]-MseI	4087	10274440	7644	repeat	Alu	SINE	AluSg
6641	1	10278572	10278795	224	SmaI[TT]-MseI	4088	10278571	7651	repeat	Alu	SINE	AluSz
6642	1	10279963	10280184	222	MseI-[AA]SmaI	4089	10280184	7655	repeat	Alu	SINE	AluSp
6649	1	10287187	10287597	411	SmaI[TT]-MseI	4092	10287186	7668	repeat	Alu	SINE	AluSc
6652	1	10295626	10295844	219	MseI-[AA]SmaI	4094	10295844	7683	repeat	Alu	SINE	AluSq
6655	1	10304764	10304980	217	SmaI[TT]-MseI	4095	10304763	7700	repeat	Alu	SINE	AluY
6657	1	10315100	10315338	239	SmaI[TT]-MseI	4096	10315099	7718	repeat	Alu	SINE	AluSz
6658	1	10315339	10315572	234	MseI-[AA]SmaI	4097	10315572	7719	repeat	Alu	SINE	AluSx1
6663	1	10350633	10350779	147	SmaI[TT]-MseI	4099	10350632	7762	repeat	Alu	SINE	AluY
6665	1	10353547	10353791	245	SmaI[TT]-MseI	4100	10353546	7765	repeat	Alu	SINE	AluSc
6667	1	10375329	10375573	245	SmaI[TT]-MseI	4101	10375328	7780	repeat	Alu	SINE	AluSx1
6670	1	10378130	10378701	572	MseI-[AA]SmaI	4103	10378701	7789	repeat	Alu	SINE	AluSq2
6673	1	10379253	10379640	388	SmaI[TT]-MseI	4104	10379252	7790	repeat	Alu	SINE	AluSx
6674	1	10389125	10389715	591	MseI-[AA]SmaI	4105	10389715	7800	repeat	Alu	SINE	AluSg
6678	1	10392963	10393185	223	SmaI[TT]-MseI	4107	10392962	7804	repeat	Alu	SINE	AluSx
6679	1	10393186	10393352	167	MseI-[AA]SmaI	4108	10393352	7805	repeat	Alu	SINE	AluSp
6681	1	10394046	10394133	88	MseI-[AA]SmaI	4109	10394133	7807	repeat	Alu	SINE	AluSc5
6684	1	10396300	10396793	494	SmaI[TT]-MseI	4110	10396299	7811	repeat	Alu	SINE	AluSg
6689	1	10416122	10416347	226	MseI-[AA]SmaI	4113	10416347	7830	repeat	Alu	SINE	AluSg7
6693	1	10420445	10420667	223	MseI-[AA]SmaI	4115	10420667	7838	repeat	Alu	SINE	AluSx1
6696	1	10427880	10428137	258	SmaI[TT]-MseI	4116	10427879	7851	repeat	Alu	SINE	AluSc
6701	1	10433386	10433636	251	SmaI[TT]-MseI	4119	10433385	7864	repeat	Alu	SINE	AluSx1
6707	1	10442272	10442639	368	SmaI[TT]-MseI	4122	10442271	7871	repeat	Alu	SINE	AluSg
6708	1	10446034	10446248	215	MseI-[AA]SmaI	4123	10446248	7876	repeat	Alu	SINE	AluSx1
6715	1	10450658	10451114	457	SmaI[TT]-MseI	4126	10450657	7888	repeat	Alu	SINE	AluY
6717	1	10453565	10453769	205	SmaI[TT]-MseI	4127	10453564	7895	repeat	Alu	SINE	AluSc8
6719	1	10456426	10456496	71	SmaI[TT]-MseI	4128	10456425	7903	repeat	Alu	SINE	AluSz
6720	1	10457688	10458200	513	MseI-[AA]SmaI	4129	10458200	7907	repeat	Alu	SINE	AluSg4
6727	1	10461744	10461996	253	MseI-[AA]SmaI	4133	10461996	7910	repeat	Alu	SINE	AluY
6730	1	10462673	10462893	221	SmaI[TT]-MseI	4134	10462672	7913	repeat	Alu	SINE	AluY
6732	1	10474525	10474808	284	SmaI[TT]-MseI	4135	10474524	7934	repeat	Alu	SINE	AluSx
6734	1	10477860	10478097	238	SmaI[TT]-MseI	4136	10477859	7937	repeat	Alu	SINE	AluSq2
6736	1	10481014	10481216	203	SmaI[TT]-MseI	4137	10481013	7940	repeat	Alu	SINE	AluY
6738	1	10488662	10488879	218	SmaI[TT]-MseI	4138	10488661	7954	repeat	Alu	SINE	AluSz
6741	1	10491594	10491835	242	MseI-[AA]SmaI	4140	10491835	7958	repeat	Alu	SINE	AluSx1
6750	1	10503560	10504088	529	SmaI[TT]-MseI	4145	10503559	7976	repeat	Alu	SINE	AluSg
6751	1	10508618	10508900	283	MseI-[AA]SmaI	4146	10508900	7991	repeat	Alu	SINE	AluSc8
6761	1	10515011	10515482	472	SmaI[TT]-MseI	4151	10515010	8000	repeat	Alu	SINE	AluSp
6763	1	10515646	10516168	523	SmaI[TT]-MseI	4152	10515645	8002	repeat	Alu	SINE	AluY
6764	1	10526722	10526934	213	MseI-[AA]SmaI	4153	10526934	8028	repeat	Alu	SINE	AluSz
6767	1	10529967	10530104	138	SmaI[TT]-MseI	4154	10529966	8035	repeat	Alu	SINE	AluSg7
6769	1	10530575	10530795	221	SmaI[TT]-MseI	4155	10530574	8037	repeat	Alu	SINE	AluY
6770	1	10530796	10531044	249	MseI-[AA]SmaI	4156	10531044	8038	repeat	Alu	SINE	AluY
6782	1	10536642	10536766	125	SmaI[TT]-MseI	4163	10536641	8045	repeat	Alu	SINE	AluSx1
6784	1	10542584	10542804	221	SmaI[TT]-MseI	4164	10542583	8062	repeat	Alu	SINE	AluSc
6786	1	10551831	10552148	318	SmaI[TT]-MseI	4165	10551830	8081	repeat	Alu	SINE	AluSz6
6788	1	10559599	10560104	506	SmaI[TT]-MseI	4166	10559598	8085	repeat	Alu	SINE	AluSg
6790	1	10560725	10560959	235	SmaI[TT]-MseI	4167	10560724	8087	repeat	Alu	SINE	AluSz6
6792	1	10565831	10566089	259	SmaI[TT]-MseI	4168	10565830	8096	repeat	Alu	SINE	AluSz6
6794	1	10572110	10572328	219	SmaI[TT]-MseI	4169	10572109	8101	repeat	Alu	SINE	AluY
6797	1	10586557	10587498	942	MseI-[AA]SmaI	4171	10587498	8113	repeat	Alu	SINE	AluSc
6809	1	10606326	10606850	525	MseI-[AA]SmaI	4177	10606850	8126	repeat	Alu	SINE	AluY
6813	1	10611841	10612074	234	MseI-[AA]SmaI	4179	10612074	8129	repeat	Alu	SINE	AluSx1
6816	1	10620208	10620429	222	SmaI[TT]-MseI	4180	10620207	8137	repeat	Alu	SINE	AluSp
6818	1	10623062	10623358	297	SmaI[TT]-MseI	4181	10623061	8141	repeat	Alu	SINE	AluSx3
6819	1	10623359	10623606	248	MseI-[AA]SmaI	4182	10623606	8142	repeat	Alu	SINE	AluSp
6825	1	10660177	10660402	226	MseI-[AA]SmaI	4185	10660402	8178	repeat	Alu	SINE	AluSq
6829	1	10669600	10669866	267	MseI-[AA]SmaI	4187	10669866	8185	repeat	Alu	SINE	AluSx1
6834	1	10681497	10681988	492	SmaI[TT]-MseI	4190	10681496	8195	repeat	Alu	SINE	AluSg
6844	1	10686471	10686707	237	SmaI[TT]-MseI	4195	10686470	NA	NULL	Unique	NULL	NULL
6846	1	10687207	10687390	184	SmaI[TT]-MseI	4196	10687206	NA	NULL	Unique	NULL	NULL
6848	1	10688086	10688302	217	SmaI[TT]-MseI	4197	10688085	8198	repeat	Alu	SINE	AluSx1
6879	1	10705291	10705511	221	MseI-[AA]SmaI	4218	10705511	8200	repeat	Alu	SINE	AluY
6920	1	10745592	10745669	78	MseI-[AA]SmaI	4244	10745669	NA	NULL	Unique	NULL	NULL
6956	1	10770210	10771112	903	MseI-[AA]SmaI	4266	10771112	8212	repeat	Alu	SINE	AluSx
6965	1	10791015	10791087	73	MseI-[AA]SmaI	4271	10791087	8227	repeat	Alu	SINE	AluSg
6971	1	10796060	10796460	401	MseI-[AA]SmaI	4274	10796460	NA	NULL	Unique	NULL	NULL
6997	1	10817550	10817769	220	MseI-[AA]SmaI	4290	10817769	8247	repeat	Alu	SINE	AluSz
6999	1	10818482	10818607	126	SmaI[TT]-MseI	4291	10818481	8248	repeat	Alu	SINE	AluSz6
7013	1	10829667	10829885	219	SmaI[TT]-MseI	4298	10829666	8257	repeat	Alu	SINE	AluSz
7023	1	10843282	10843853	572	MseI-[AA]SmaI	4304	10843853	8263	repeat	Alu	SINE	AluSz
7052	1	10862003	10862213	211	SmaI[TT]-MseI	4323	10862002	8275	repeat	Alu	SINE	AluSx
7058	1	10878181	10878772	592	SmaI[TT]-MseI	4326	10878180	8296	repeat	Alu	SINE	AluSx1
7067	1	10883117	10883252	136	SmaI[TT]-MseI	4331	10883116	NA	NULL	Unique	NULL	NULL
7068	1	10886267	10886490	224	MseI-[AA]SmaI	4332	10886490	8309	repeat	Alu	SINE	AluSz
7070	1	10886696	10886782	87	SmaI[TT]-MseI	4333	10886695	8310	repeat	Alu	SINE	AluSx3
7085	1	10908777	10908991	215	MseI-[AA]SmaI	4341	10908991	8340	repeat	Alu	SINE	AluSz
7107	1	10940902	10941588	687	MseI-[AA]SmaI	4354	10941588	8374	repeat	Alu	SINE	AluSq2
7110	1	10943298	10943923	626	SmaI[TT]-MseI	4355	10943297	8377	repeat	Alu	SINE	AluSx1
7123	1	10951715	10951952	238	MseI-[AA]SmaI	4365	10951952	8390	repeat	Alu	SINE	AluSq2
7148	1	10981402	10982385	984	MseI-[AA]SmaI	4379	10982385	8426	repeat	Alu	SINE	AluSp
7150	1	10989380	10989912	533	MseI-[AA]SmaI	4380	10989912	8438	repeat	Alu	SINE	AluSq
7154	1	10990707	10990793	87	SmaI[TT]-MseI	4382	10990706	8441	repeat	Alu	SINE	AluSc8
7158	1	10992784	10993306	523	SmaI[TT]-MseI	4384	10992783	8446	repeat	Alu	SINE	AluY
7159	1	10996277	10996579	303	MseI-[AA]SmaI	4385	10996579	8451	repeat	Alu	SINE	AluSx
7179	1	11024781	11025486	706	SmaI[TT]-MseI	4396	11024780	8482	repeat	Alu	SINE	AluSz6
7184	1	11034861	11035387	527	MseI-[AA]SmaI	4399	11035387	8497	repeat	Alu	SINE	AluSg
7192	1	11043003	11043027	25	MseI-[AA]SmaI	4403	11043027	8512	repeat	Alu	SINE	AluSq2
7200	1	11058769	11059182	414	MseI-[AA]SmaI	4407	11059182	8552	repeat	Alu	SINE	AluSx1
7206	1	11068660	11068923	264	MseI-[AA]SmaI	4410	11068923	8573	repeat	Alu	SINE	AluYc
7208	1	11069162	11069703	542	SmaI[TT]-[AA]SmaI	4411	11069161	8574	repeat	Alu	SINE	AluSq2
7210	1	11070859	11070948	90	MseI-[AA]SmaI	4413	11070948	8579	repeat	Alu	SINE	AluYk4
7216	1	11075565	11075651	87	MseI-[AA]SmaI	4417	11075651	8588	repeat	Alu	SINE	AluSx
7221	1	11078033	11078559	527	SmaI[TT]-MseI	4419	11078032	8595	repeat	Alu	SINE	AluY
7223	1	11079717	11080296	580	SmaI[TT]-MseI	4420	11079716	8597	repeat	Alu	SINE	AluY
7227	1	11089143	11089370	228	SmaI[TT]-MseI	4422	11089142	8605	repeat	Alu	SINE	AluY
7228	1	11091104	11091510	407	MseI-[AA]SmaI	4423	11091510	8609	repeat	Alu	SINE	AluY
7233	1	11093027	11093914	888	MseI-[AA]SmaI	4426	11093914	8616	repeat	Alu	SINE	AluSz
7235	1	11096259	11096485	227	MseI-[AA]SmaI	4427	11096485	8621	repeat	Alu	SINE	AluYb8
7242	1	11109767	11109988	222	MseI-[AA]SmaI	4431	11109988	8636	repeat	Alu	SINE	AluY
7263	1	11121178	11121440	263	MseI-[AA]SmaI	4445	11121440	8651	repeat	Alu	SINE	AluSc
7265	1	11127058	11127413	356	MseI-[AA]SmaI	4446	11127413	8660	repeat	Alu	SINE	AluY
7270	1	11138408	11138854	447	SmaI[TT]-MseI	4448	11138407	8675	repeat	Alu	SINE	AluYa5
7273	1	11141625	11142063	439	MseI-[AA]SmaI	4450	11142063	8680	repeat	Alu	SINE	AluSp
7276	1	11152365	11153015	651	SmaI[TT]-MseI	4451	11152364	8690	repeat	Alu	SINE	AluSc
7278	1	11154751	11154970	220	SmaI[TT]-MseI	4452	11154750	8695	repeat	Alu	SINE	AluSx
7279	1	11155445	11155695	251	MseI-[AA]SmaI	4453	11155695	8697	repeat	Alu	SINE	AluY
7282	1	11156134	11156204	71	SmaI[TT]-MseI	4454	11156133	8698	repeat	Alu	SINE	AluSz6
7287	1	11161012	11161619	608	SmaI[TT]-MseI	4457	11161011	8710	repeat	Alu	SINE	AluSx3
7289	1	11162570	11162654	85	SmaI[TT]-MseI	4458	11162569	8714	repeat	Alu	SINE	AluSg
7298	1	11177311	11177615	305	SmaI[TT]-MseI	4463	11177310	8731	repeat	Alu	SINE	AluSx1
7299	1	11179459	11179552	94	MseI-[AA]SmaI	4464	11179552	8738	repeat	Alu	SINE	AluY
7303	1	11195593	11195814	222	MseI-[AA]SmaI	4466	11195814	8756	repeat	Alu	SINE	AluSx
7306	1	11199842	11200060	219	SmaI[TT]-MseI	4467	11199841	8761	repeat	Alu	SINE	AluSg7
7310	1	11205527	11205878	352	SmaI[TT]-MseI	4469	11205526	8769	repeat	Alu	SINE	AluSx1
7313	1	11208660	11208879	220	MseI-[AA]SmaI	4471	11208879	8771	repeat	Alu	SINE	AluSg7
7316	1	11216141	11216359	219	SmaI[TT]-MseI	4472	11216140	8779	repeat	Alu	SINE	AluSz
7319	1	11245338	11246064	727	MseI-[AA]SmaI	4474	11246064	8812	repeat	Alu	SINE	AluY
7329	1	11277551	11277814	264	SmaI[TT]-MseI	4479	11277550	8835	repeat	Alu	SINE	AluY
7331	1	11281145	11281470	326	SmaI[TT]-MseI	4480	11281144	8839	repeat	Alu	SINE	AluSz
7333	1	11282347	11282566	220	SmaI[TT]-MseI	4481	11282346	8840	repeat	Alu	SINE	AluY
7337	1	11298913	11299144	232	SmaI[TT]-MseI	4483	11298912	8855	repeat	Alu	SINE	AluY
7338	1	11301082	11301302	221	MseI-[AA]SmaI	4484	11301302	8859	repeat	Alu	SINE	AluY
7340	1	11303874	11304273	400	MseI-[AA]SmaI	4485	11304273	8866	repeat	Alu	SINE	AluSp
7342	1	11304353	11304612	260	MseI-[AA]SmaI	4486	11304612	8867	repeat	Alu	SINE	AluSx
7347	1	11320940	11321453	514	SmaI[TT]-[AA]SmaI	4488	11320939	8890	repeat	Alu	SINE	AluSx
7351	1	11323218	11323467	250	MseI-[AA]SmaI	4491	11323467	8892	repeat	Alu	SINE	AluSx
7354	1	11328103	11328657	555	SmaI[TT]-MseI	4492	11328102	8902	repeat	Alu	SINE	AluSx
7356	1	11330402	11331240	839	SmaI[TT]-MseI	4493	11330401	8910	repeat	Alu	SINE	AluSp
7358	1	11332331	11332544	214	SmaI[TT]-MseI	4494	11332330	8918	repeat	Alu	SINE	AluSx1
7364	1	11339574	11339786	213	SmaI[TT]-MseI	4497	11339573	8928	repeat	Alu	SINE	AluSx1
7367	1	11351283	11351588	306	MseI-[AA]SmaI	4499	11351588	8938	repeat	Alu	SINE	AluSz
7373	1	11363175	11363713	539	SmaI[TT]-MseI	4502	11363174	8954	repeat	Alu	SINE	AluSz
7375	1	11364499	11364894	396	SmaI[TT]-MseI	4503	11364498	8956	repeat	Alu	SINE	AluY
7388	1	11390191	11390987	797	MseI-[AA]SmaI	4510	11390987	8986	repeat	Alu	SINE	AluSx1
7401	1	11413689	11413910	222	SmaI[TT]-MseI	4517	11413688	9013	repeat	Alu	SINE	AluSz
7404	1	11414284	11414873	590	SmaI[TT]-MseI	4519	11414283	9014	repeat	Alu	SINE	AluSx1
7407	1	11418424	11418704	281	MseI-[AA]SmaI	4521	11418704	9019	repeat	Alu	SINE	AluSz
7414	1	11430662	11430916	255	SmaI[TT]-MseI	4524	11430661	9030	repeat	Alu	SINE	AluY
7417	1	11432498	11432589	92	SmaI[TT]-MseI	4526	11432497	9034	repeat	Alu	SINE	AluSc5
7421	1	11436364	11436631	268	SmaI[TT]-MseI	4528	11436363	9039	repeat	Alu	SINE	AluSz
7422	1	11438911	11439119	209	MseI-[AA]SmaI	4529	11439119	9044	repeat	Alu	SINE	AluSx1
7424	1	11441394	11441921	528	MseI-[AA]SmaI	4530	11441921	9049	repeat	Alu	SINE	AluY
7427	1	11446548	11447071	524	SmaI[TT]-MseI	4531	11446547	9053	repeat	Alu	SINE	AluSx
7429	1	11453094	11453309	216	SmaI[TT]-MseI	4532	11453093	9062	repeat	Alu	SINE	AluSx
7435	1	11459098	11459277	180	MseI-[AA]SmaI	4536	11459277	9067	repeat	Alu	SINE	AluSz
7438	1	11459694	11459784	91	SmaI[TT]-MseI	4537	11459693	9069	repeat	Alu	SINE	AluSx
7439	1	11463126	11463320	195	MseI-[AA]SmaI	4538	11463320	9072	repeat	Alu	SINE	AluSz
7443	1	11470386	11470609	224	MseI-[AA]SmaI	4540	11470609	9080	repeat	Alu	SINE	AluSp
7445	1	11477777	11477997	221	MseI-[AA]SmaI	4541	11477997	9084	repeat	Alu	SINE	AluSz6
7447	1	11481562	11482072	511	MseI-[AA]SmaI	4542	11482072	9087	repeat	Alu	SINE	AluSz
7451	1	11483555	11483778	224	MseI-[AA]SmaI	4544	11483778	9088	repeat	Alu	SINE	AluSq
7454	1	11491152	11491370	219	SmaI[TT]-MseI	4545	11491151	9097	repeat	Alu	SINE	AluSx1
7467	1	11520137	11520353	217	MseI-[AA]SmaI	4552	11520353	9125	repeat	Alu	SINE	AluSx1
7483	1	11554887	11555372	486	MseI-[AA]SmaI	4562	11555372	9170	repeat	Alu	SINE	AluSz
7485	1	11569874	11570080	207	MseI-[AA]SmaI	4563	11570080	9181	repeat	Alu	SINE	AluY
7499	1	11592848	11592927	80	SmaI[TT]-MseI	4571	11592847	9197	repeat	Alu	SINE	AluSx
7509	1	11609783	11609999	217	SmaI[TT]-MseI	4576	11609782	9215	repeat	Alu	SINE	AluY
7512	1	11618120	11618341	222	MseI-[AA]SmaI	4578	11618341	NA	NULL	Unique	NULL	NULL
7514	1	11622421	11622636	216	MseI-[AA]SmaI	4579	11622636	9224	repeat	Alu	SINE	AluSx
7518	1	11628666	11628888	223	SmaI[TT]-MseI	4581	11628665	9232	repeat	Alu	SINE	AluSq2
7524	1	11636809	11636914	106	MseI-[AA]SmaI	4585	11636914	9240	repeat	Alu	SINE	AluJb
7530	1	11645979	11646042	64	SmaI[TT]-MseI	4589	11645978	NA	NULL	Unique	NULL	NULL
7534	1	11656198	11656426	229	SmaI[TT]-MseI	4591	11656197	9260	repeat	Alu	SINE	AluSx1
7537	1	11665541	11665659	119	MseI-[AA]SmaI	4593	11665659	9273	repeat	Alu	SINE	AluSc
7539	1	11667374	11667579	206	MseI-[AA]SmaI	4594	11667579	9275	repeat	Alu	SINE	AluSx
7547	1	11678099	11678654	556	MseI-[AA]SmaI	4600	11678654	9288	repeat	Alu	SINE	AluSx
7554	1	11683618	11683862	245	SmaI[TT]-MseI	4603	11683617	9297	repeat	Alu	SINE	AluSq2
7556	1	11687075	11687161	87	SmaI[TT]-MseI	4604	11687074	9301	repeat	Alu	SINE	AluSq2
7559	1	11694879	11695501	623	MseI-[AA]SmaI	4606	11695501	9313	repeat	Alu	SINE	AluYc
7565	1	11702768	11702990	223	MseI-[AA]SmaI	4609	11702990	9325	repeat	Alu	SINE	AluSc
7567	1	11704776	11704868	93	MseI-[AA]SmaI	4610	11704868	9329	repeat	Alu	SINE	AluSx1
7590	1	11725711	11725973	263	SmaI[TT]-MseI	4625	11725710	9362	repeat	Alu	SINE	AluSg
7611	1	11743729	11743952	224	MseI-[AA]SmaI	4639	11743952	9390	repeat	Alu	SINE	AluSp
7627	1	11761602	11761766	165	MseI-[AA]SmaI	4649	11761766	NA	NULL	Unique	NULL	NULL
7637	1	11770678	11770903	226	MseI-[AA]SmaI	4655	11770903	9430	repeat	Alu	SINE	AluSc8
7639	1	11772343	11773179	837	MseI-[AA]SmaI	4656	11773179	9433	repeat	Alu	SINE	AluSp
7643	1	11776891	11777264	374	MseI-[AA]SmaI	4658	11777264	9443	repeat	Alu	SINE	AluSz
7664	1	11816371	11816584	214	MseI-[AA]SmaI	4670	11816584	9498	repeat	Alu	SINE	AluSg4
7666	1	11818091	11818317	227	MseI-[AA]SmaI	4671	11818317	9501	repeat	Alu	SINE	AluY
7669	1	11819680	11820494	815	SmaI[TT]-MseI	4672	11819679	9505	repeat	Alu	SINE	AluSq2
7679	1	11832933	11833689	757	MseI-[AA]SmaI	4678	11833689	9526	repeat	Alu	SINE	AluSz
7687	1	11843398	11844093	696	SmaI[TT]-MseI	4682	11843397	9543	repeat	Alu	SINE	AluSp
7691	1	11845883	11846815	933	SmaI[TT]-MseI	4685	11845882	9545	repeat	Alu	SINE	AluSz
7697	1	11853299	11853820	522	SmaI[TT]-MseI	4688	11853298	9549	repeat	Alu	SINE	AluSg
7715	1	11871533	11872088	556	SmaI[TT]-MseI	4698	11871532	9568	repeat	Alu	SINE	AluSp
7718	1	11880499	11881057	559	MseI-[AA]SmaI	4700	11881057	9579	repeat	Alu	SINE	AluSq2
7725	1	11906470	11906987	518	SmaI[TT]-MseI	4703	11906469	9596	repeat	Alu	SINE	AluY
7726	1	11915303	11915517	215	MseI-[AA]SmaI	4704	11915517	9611	repeat	Alu	SINE	AluSz
7735	1	11925388	11925606	219	SmaI[TT]-MseI	4709	11925387	9625	repeat	Alu	SINE	AluSz6
7737	1	11926008	11926370	363	SmaI[TT]-MseI	4710	11926007	9626	repeat	Alu	SINE	AluSp
7757	1	11955832	11956038	207	MseI-[AA]SmaI	4722	11956038	9662	repeat	Alu	SINE	AluSg
7759	1	11957778	11958010	233	MseI-[AA]SmaI	4723	11958010	9666	repeat	Alu	SINE	AluY
7765	1	11970797	11970886	90	SmaI[TT]-MseI	4726	11970796	NA	NULL	Unique	NULL	NULL
7772	1	11981700	11982075	376	SmaI[TT]-MseI	4730	11981699	9701	repeat	Alu	SINE	AluSx
7776	1	11984025	11984188	164	SmaI[TT]-MseI	4732	11984024	9704	repeat	Alu	SINE	AluSx
7780	1	11986780	11987617	838	MseI-[AA]SmaI	4735	11987617	9710	repeat	Alu	SINE	AluY
7784	1	11993635	11993846	212	MseI-[AA]SmaI	4737	11993846	9726	repeat	Alu	SINE	AluSp
7791	1	11996535	11996585	51	SmaI[TT]-MseI	4741	11996534	5233582	shore	Unique	NULL	NULL
7796	1	12002550	12003013	464	MseI-[AA]SmaI	4744	12003013	NA	NULL	Unique	NULL	NULL
7798	1	12003447	12003668	222	SmaI[TT]-MseI	4745	12003446	9751	repeat	Alu	SINE	AluSq2
7800	1	12009570	12009809	240	SmaI[TT]-MseI	4746	12009569	9762	repeat	Alu	SINE	AluSx
7813	1	12022658	12023022	365	MseI-[AA]SmaI	4754	12023022	9792	repeat	Alu	SINE	AluSx
7822	1	12036825	12037043	219	SmaI[TT]-MseI	4758	12036824	9815	repeat	Alu	SINE	AluSx1
7823	1	12037546	12037633	88	MseI-[AA]SmaI	4759	12037633	9817	repeat	Alu	SINE	AluSz6
7827	1	12041266	12041484	219	MseI-[AA]SmaI	4761	12041484	9821	repeat	Alu	SINE	AluSx
7829	1	12051214	12051905	692	MseI-[AA]SmaI	4762	12051905	9834	repeat	Alu	SINE	AluYa5
7832	1	12058034	12058252	219	SmaI[TT]-MseI	4763	12058033	9844	repeat	Alu	SINE	AluSx1
7835	1	12059726	12060078	353	MseI-[AA]SmaI	4765	12060078	9848	repeat	Alu	SINE	AluY
7840	1	12073956	12074169	214	SmaI[TT]-MseI	4767	12073955	9863	repeat	Alu	SINE	AluSg7
7844	1	12077561	12077961	401	SmaI[TT]-MseI	4769	12077560	9869	repeat	Alu	SINE	AluSp
7848	1	12080834	12081156	323	SmaI[TT]-MseI	4771	12080833	9879	repeat	Alu	SINE	AluSx
7849	1	12081157	12081375	219	MseI-[AA]SmaI	4772	12081375	9881	repeat	Alu	SINE	AluY
7851	1	12083759	12083975	217	MseI-[AA]SmaI	4773	12083975	9886	repeat	Alu	SINE	AluSg
7854	1	12085210	12085433	224	SmaI[TT]-MseI	4774	12085209	9888	repeat	Alu	SINE	AluSz6
7855	1	12085598	12086336	739	MseI-[AA]SmaI	4775	12086336	9890	repeat	Alu	SINE	AluSx1
7861	1	12096159	12096389	231	MseI-[AA]SmaI	4778	12096389	9903	repeat	Alu	SINE	AluY
7869	1	12102456	12102596	141	SmaI[TT]-MseI	4782	12102455	9913	repeat	Alu	SINE	AluSq
7870	1	12103893	12104177	285	MseI-[AA]SmaI	4783	12104177	9914	repeat	Alu	SINE	AluSx
7875	1	12108984	12109201	218	SmaI[TT]-MseI	4785	12108983	9920	repeat	Alu	SINE	AluSg
7876	1	12109220	12109647	428	MseI-[AA]SmaI	4786	12109647	9921	repeat	Alu	SINE	AluSq2
7891	1	12136251	12136798	548	SmaI[TT]-MseI	4794	12136250	9958	repeat	Alu	SINE	AluSp
7899	1	12145261	12145480	220	SmaI[TT]-MseI	4798	12145260	9968	repeat	Alu	SINE	AluSq
7901	1	12152658	12153225	568	SmaI[TT]-MseI	4799	12152657	9974	repeat	Alu	SINE	AluY
7903	1	12155438	12155666	229	SmaI[TT]-MseI	4800	12155437	9980	repeat	Alu	SINE	AluSq2
7904	1	12160637	12160938	302	MseI-[AA]SmaI	4801	12160938	9986	repeat	Alu	SINE	AluSz
7910	1	12176537	12176781	245	MseI-[AA]SmaI	4804	12176781	10008	repeat	Alu	SINE	AluSx1
7913	1	12177233	12177868	636	SmaI[TT]-MseI	4805	12177232	10009	repeat	Alu	SINE	AluSx1
7915	1	12179015	12179487	473	SmaI[TT]-MseI	4806	12179014	10011	repeat	Alu	SINE	AluSg
7919	1	12182979	12183275	297	SmaI[TT]-MseI	4808	12182978	10015	repeat	Alu	SINE	AluSz
7920	1	12184382	12184803	422	MseI-[AA]SmaI	4809	12184803	10018	repeat	Alu	SINE	AluSg
7927	1	12191944	12192155	212	SmaI[TT]-MseI	4812	12191943	10027	repeat	Alu	SINE	AluSg
7936	1	12201778	12201888	111	SmaI[TT]-MseI	4817	12201777	NA	NULL	Unique	NULL	NULL
7949	1	12238639	12238915	277	SmaI[TT]-MseI	4825	12238638	NA	NULL	Unique	NULL	NULL
7951	1	12239289	12240269	981	SmaI[TT]-MseI	4826	12239288	NA	NULL	Unique	NULL	NULL
7963	1	12256063	12256282	220	MseI-[AA]SmaI	4833	12256282	10095	repeat	Alu	SINE	AluSz
7967	1	12258841	12259608	768	SmaI[TT]-MseI	4836	12258840	10101	repeat	Alu	SINE	AluY
7971	1	12267075	12267891	817	MseI-[AA]SmaI	4839	12267891	10115	repeat	Alu	SINE	AluSx1
7974	1	12271946	12272070	125	SmaI[TT]-MseI	4840	12271945	10120	repeat	Alu	SINE	AluSx
7975	1	12277957	12278151	195	MseI-[AA]SmaI	4841	12278151	10130	repeat	Alu	SINE	AluSx1
7976	1	12278152	12278237	86	SmaI[TT]-MseI	4841	12278151	10130	repeat	Alu	SINE	AluSx1
7978	1	12279226	12279716	491	SmaI[TT]-MseI	4842	12279225	10135	repeat	Alu	SINE	AluSc8
7983	1	12288943	12289355	413	SmaI[TT]-MseI	4845	12288942	10150	repeat	Alu	SINE	AluSx4
7989	1	12293156	12293409	254	SmaI[TT]-MseI	4849	12293155	10152	repeat	Alu	SINE	AluSx1
7990	1	12293811	12294029	219	MseI-[AA]SmaI	4850	12294029	10153	repeat	Alu	SINE	AluSq
7994	1	12306845	12307398	554	MseI-[AA]SmaI	4852	12307398	10172	repeat	Alu	SINE	AluSz
7997	1	12308038	12308124	87	SmaI[TT]-MseI	4853	12308037	10174	repeat	Alu	SINE	AluSx1
8000	1	12315096	12315313	218	SmaI[TT]-MseI	4855	12315095	10183	repeat	Alu	SINE	AluSx
8002	1	12328112	12328326	215	SmaI[TT]-MseI	4856	12328111	10191	repeat	Alu	SINE	AluSz6
8005	1	12350484	12350704	221	MseI-[AA]SmaI	4858	12350704	10213	repeat	Alu	SINE	AluY
8010	1	12366134	12366578	445	SmaI[TT]-MseI	4860	12366133	10228	repeat	Alu	SINE	AluY
8012	1	12369361	12369930	570	SmaI[TT]-MseI	4861	12369360	10232	repeat	Alu	SINE	AluSc
8014	1	12375967	12376258	292	SmaI[TT]-MseI	4862	12375966	10239	repeat	Alu	SINE	AluSg
8018	1	12407321	12407534	214	SmaI[TT]-MseI	4864	12407320	10264	repeat	Alu	SINE	AluSc8
8019	1	12413287	12413514	228	MseI-[AA]SmaI	4865	12413514	10269	repeat	Alu	SINE	AluY
8024	1	12431539	12431982	444	SmaI[TT]-MseI	4867	12431538	10284	repeat	Alu	SINE	AluSq
8026	1	12439916	12440181	266	SmaI[TT]-MseI	4868	12439915	10296	repeat	Alu	SINE	AluY
8038	1	12525795	12526114	320	MseI-[AA]SmaI	4875	12526114	10364	repeat	Alu	SINE	AluSc
8041	1	12527320	12527538	219	SmaI[TT]-MseI	4876	12527319	10365	repeat	Alu	SINE	AluSg
8044	1	12543758	12543977	220	MseI-[AA]SmaI	4878	12543977	10372	repeat	Alu	SINE	AluSg
8048	1	12568596	12568688	93	MseI-[AA]SmaI	4880	12568688	10386	repeat	Alu	SINE	AluSc8
8052	1	12572551	12572695	145	MseI-[AA]SmaI	4882	12572695	10388	repeat	Alu	SINE	AluSc8
8057	1	12575912	12576306	395	SmaI[TT]-MseI	4884	12575911	10391	repeat	Alu	SINE	AluY
8061	1	12581892	12582123	232	SmaI[TT]-MseI	4886	12581891	10400	repeat	Alu	SINE	AluSq2
8062	1	12582683	12582917	235	MseI-[AA]SmaI	4887	12582917	10402	repeat	Alu	SINE	AluSx1
8067	1	12590068	12590390	323	SmaI[TT]-MseI	4889	12590067	10410	repeat	Alu	SINE	AluSz
8069	1	12591044	12591303	260	SmaI[TT]-MseI	4890	12591043	10411	repeat	Alu	SINE	AluSz
8071	1	12594251	12594458	208	SmaI[TT]-MseI	4891	12594250	10414	repeat	Alu	SINE	AluSx
8090	1	12636195	12636514	320	MseI-[AA]SmaI	4902	12636514	10464	repeat	Alu	SINE	AluY
8094	1	12639597	12639812	216	SmaI[TT]-MseI	4904	12639596	10470	repeat	Alu	SINE	AluSx1
8110	1	12657183	12657482	300	SmaI[TT]-MseI	4914	12657182	10486	repeat	Alu	SINE	AluSg4
8113	1	12664891	12665006	116	MseI-[AA]SmaI	4916	12665006	10493	repeat	Alu	SINE	AluSc
8116	1	12666588	12666816	229	SmaI[TT]-MseI	4917	12666587	10495	repeat	Alu	SINE	AluSp
8130	1	12685035	12685253	219	SmaI[TT]-MseI	4926	12685034	10509	repeat	Alu	SINE	AluSx1
8132	1	12688925	12689141	217	SmaI[TT]-MseI	4927	12688924	10518	repeat	Alu	SINE	AluSg
8134	1	12694617	12695213	597	SmaI[TT]-MseI	4928	12694616	10522	repeat	Alu	SINE	AluSp
8146	1	12720748	12720955	208	SmaI[TT]-MseI	4934	12720747	10555	repeat	Alu	SINE	AluSx4
8152	1	12750861	12751625	765	SmaI[TT]-MseI	4937	12750860	10580	repeat	Alu	SINE	AluY
8154	1	12753914	12754228	315	SmaI[TT]-MseI	4938	12753913	10583	repeat	Alu	SINE	AluSc8
8155	1	12773884	12774344	461	MseI-[AA]SmaI	4939	12774344	10593	repeat	Alu	SINE	AluSx
8164	1	12785296	12785620	325	SmaI[TT]-MseI	4943	12785295	NA	NULL	Unique	NULL	NULL
8166	1	12800601	12801234	634	SmaI[TT]-MseI	4944	12800600	10611	repeat	Alu	SINE	AluSq
8171	1	12818968	12819343	376	MseI-[AA]SmaI	4947	12819343	NA	NULL	Unique	NULL	NULL
8180	1	12887939	12888810	872	SmaI[TT]-MseI	4951	12887938	10661	repeat	Alu	SINE	AluSx1
8181	1	12890542	12890772	231	MseI-[AA]SmaI	4952	12890772	10666	repeat	Alu	SINE	AluSx1
8183	1	12897899	12898223	325	MseI-[AA]SmaI	4953	12898223	10677	repeat	Alu	SINE	AluYa5
8187	1	12910704	12910986	283	MseI-[AA]SmaI	4955	12910986	10687	repeat	Alu	SINE	AluSp
8190	1	12914285	12914432	148	SmaI[TT]-MseI	4956	12914284	10693	repeat	Alu	SINE	AluY
8192	1	12936548	12936935	388	SmaI[TT]-MseI	4957	12936547	10709	repeat	Alu	SINE	AluSx3
8195	1	12945155	12945530	376	MseI-[AA]SmaI	4959	12945530	10722	repeat	Alu	SINE	AluSx1
8202	1	12995932	12996216	285	SmaI[TT]-MseI	4962	12995931	10759	repeat	Alu	SINE	AluSz
8224	1	13039445	13039596	152	SmaI[TT]-MseI	4973	13039444	10833	repeat	Alu	SINE	AluSz
8226	1	13049908	13050296	389	SmaI[TT]-MseI	4974	13049907	10838	repeat	Alu	SINE	AluSx3
8228	1	13106265	13106549	285	SmaI[TT]-MseI	4975	13106264	10846	repeat	Alu	SINE	AluSz
8240	1	13131663	13131958	296	SmaI[TT]-MseI	4981	13131662	10890	repeat	Alu	SINE	AluSx
8244	1	13138903	13138988	86	SmaI[TT]-MseI	4983	13138902	10906	repeat	Alu	SINE	AluSx
8247	1	13147430	13147822	393	MseI-[AA]SmaI	4985	13147822	10917	repeat	Alu	SINE	AluSx3
8254	1	13187782	13188234	453	MseI-[AA]SmaI	4989	13188234	10948	repeat	Alu	SINE	AluSg
8257	1	13189662	13189809	148	SmaI[TT]-MseI	4990	13189661	10951	repeat	Alu	SINE	AluY
8263	1	13213866	13214256	391	SmaI[TT]-MseI	4994	13213865	10970	repeat	Alu	SINE	AluSx3
8309	1	13481979	13482194	216	MseI-[AA]SmaI	5018	13482194	11146	repeat	Alu	SINE	AluSx4
8312	1	13485781	13486092	312	SmaI[TT]-MseI	5019	13485780	11154	repeat	Alu	SINE	AluSx
8335	1	13523452	13523703	252	SmaI[TT]-MseI	5031	13523451	11217	repeat	Alu	SINE	AluY
8352	1	13552689	13552911	223	SmaI[TT]-MseI	5040	13552688	11267	repeat	Alu	SINE	AluSp
8370	1	13702816	13703031	216	MseI-[AA]SmaI	5050	13703031	11361	repeat	Alu	SINE	AluSx4
8373	1	13706613	13706924	312	SmaI[TT]-MseI	5051	13706612	11369	repeat	Alu	SINE	AluSx
8385	1	13725698	13725976	279	SmaI[TT]-MseI	5057	13725697	11399	repeat	Alu	SINE	AluSp
8396	1	13743538	13743984	447	MseI-[AA]SmaI	5063	13743984	11431	repeat	Alu	SINE	AluSc5
8398	1	13744292	13744563	272	SmaI[TT]-MseI	5064	13744291	11432	repeat	Alu	SINE	AluY
8415	1	13773548	13773770	223	SmaI[TT]-MseI	5073	13773547	11482	repeat	Alu	SINE	AluSp
8417	1	13777237	13777579	343	SmaI[TT]-MseI	5074	13777236	11489	repeat	Alu	SINE	AluSp
8420	1	13784362	13784868	507	MseI-[AA]SmaI	5076	13784868	11505	repeat	Alu	SINE	AluSp
8425	1	13799161	13799452	292	SmaI[TT]-MseI	5078	13799160	11520	repeat	Alu	SINE	AluY
8427	1	13802890	13803697	808	SmaI[TT]-MseI	5079	13802889	11521	repeat	Alu	SINE	AluSx
8430	1	13811434	13811655	222	MseI-[AA]SmaI	5081	13811655	11535	repeat	Alu	SINE	AluSp
8433	1	13812486	13812811	326	SmaI[TT]-MseI	5082	13812485	11537	repeat	Alu	SINE	AluSx1
8438	1	13825898	13826631	734	MseI-[AA]SmaI	5085	13826631	11554	repeat	Alu	SINE	AluSx
8453	1	13851070	13851312	243	MseI-[AA]SmaI	5094	13851312	11586	repeat	Alu	SINE	AluSg
8458	1	13853889	13854112	224	MseI-[AA]SmaI	5097	13854112	11592	repeat	Alu	SINE	AluY
8460	1	13855728	13856104	377	MseI-[AA]SmaI	5098	13856104	11594	repeat	Alu	SINE	AluSp
8462	1	13856889	13856978	90	MseI-[AA]SmaI	5099	13856978	11595	repeat	Alu	SINE	AluY
8464	1	13857153	13857576	424	MseI-[AA]SmaI	5100	13857576	11596	repeat	Alu	SINE	AluY
8472	1	13874324	13874542	219	MseI-[AA]SmaI	5104	13874542	11621	repeat	Alu	SINE	AluSp
8475	1	13878441	13879385	945	MseI-[AA]SmaI	5106	13879385	11627	repeat	Alu	SINE	AluY
8477	1	13880541	13880763	223	MseI-[AA]SmaI	5107	13880763	11629	repeat	Alu	SINE	AluSx3
8480	1	13881130	13881999	870	SmaI[TT]-[AA]SmaI	5109	13881999	11631	repeat	Alu	SINE	AluSp
8484	1	13895006	13895223	218	MseI-[AA]SmaI	5111	13895223	11636	repeat	Alu	SINE	AluY
8487	1	13901190	13901417	228	SmaI[TT]-MseI	5112	13901189	11640	repeat	Alu	SINE	AluY
8494	1	13917530	13917769	240	SmaI[TT]-MseI	5116	13917529	11652	repeat	Alu	SINE	AluSg
8496	1	13919138	13919419	282	SmaI[TT]-MseI	5117	13919137	11654	repeat	Alu	SINE	AluSp
8497	1	13934437	13934524	88	MseI-[AA]SmaI	5118	13934524	11672	repeat	Alu	SINE	AluSq
8500	1	13951860	13952079	220	SmaI[TT]-MseI	5119	13951859	11685	repeat	Alu	SINE	AluSq
8502	1	13952253	13952474	222	SmaI[TT]-MseI	5120	13952252	11686	repeat	Alu	SINE	AluY
8510	1	13963223	13963603	381	SmaI[TT]-MseI	5125	13963222	11699	repeat	Alu	SINE	AluSx
8512	1	13970109	13970313	205	SmaI[TT]-MseI	5126	13970108	11702	repeat	Alu	SINE	AluY
8514	1	13991804	13992013	210	SmaI[TT]-MseI	5127	13991803	11723	repeat	Alu	SINE	AluSx1
8518	1	13994608	13995473	866	SmaI[TT]-MseI	5129	13994607	11726	repeat	Alu	SINE	AluSg
8519	1	13999551	13999941	391	MseI-[AA]SmaI	5130	13999941	11735	repeat	Alu	SINE	AluYb8
8524	1	14021167	14021387	221	SmaI[TT]-MseI	5132	14021166	11757	repeat	Alu	SINE	AluY
8526	1	14025232	14025795	564	SmaI[TT]-MseI	5133	14025231	11761	repeat	Alu	SINE	AluY
8532	1	14037269	14037504	236	MseI-[AA]SmaI	5137	14037504	11766	repeat	Alu	SINE	AluY
8535	1	14040457	14040678	222	SmaI[TT]-MseI	5138	14040456	11769	repeat	Alu	SINE	AluY
8538	1	14051793	14052138	346	SmaI[TT]-MseI	5140	14051792	11773	repeat	Alu	SINE	AluSz
8545	1	14082433	14082682	250	MseI-[AA]SmaI	5144	14082682	11794	repeat	Alu	SINE	AluY
8548	1	14094666	14094890	225	SmaI[TT]-MseI	5145	14094665	11802	repeat	Alu	SINE	AluY
8550	1	14094968	14095320	353	SmaI[TT]-MseI	5146	14094967	11803	repeat	Alu	SINE	AluSq2
8551	1	14097828	14098149	322	MseI-[AA]SmaI	5147	14098149	11806	repeat	Alu	SINE	AluY
8558	1	14112427	14112645	219	SmaI[TT]-MseI	5150	14112426	11810	repeat	Alu	SINE	AluY
8563	1	14125645	14125864	220	MseI-[AA]SmaI	5153	14125864	11818	repeat	Alu	SINE	AluSq2
8568	1	14132868	14132940	73	SmaI[TT]-MseI	5155	14132867	1775340	repeat	LINE	LINE	L2b
8572	1	14141695	14142018	324	SmaI[TT]-MseI	5157	14141694	11832	repeat	Alu	SINE	AluSx1
8580	1	14165272	14165496	225	SmaI[TT]-MseI	5161	14165271	11851	repeat	Alu	SINE	AluSx1
8581	1	14165497	14165722	226	MseI-[AA]SmaI	5162	14165722	11852	repeat	Alu	SINE	AluY
8587	1	14201926	14202307	382	MseI-[AA]SmaI	5165	14202307	11863	repeat	Alu	SINE	AluY
8603	1	14237637	14238233	597	SmaI[TT]-MseI	5174	14237636	11883	repeat	Alu	SINE	AluSx1
8605	1	14248214	14249157	944	SmaI[TT]-MseI	5175	14248213	11892	repeat	Alu	SINE	AluY
8606	1	14249755	14249992	238	MseI-[AA]SmaI	5176	14249992	11893	repeat	Alu	SINE	AluY
8614	1	14259691	14259911	221	MseI-[AA]SmaI	5180	14259911	11901	repeat	Alu	SINE	AluSp
8618	1	14268538	14268959	422	MseI-[AA]SmaI	5182	14268959	11910	repeat	Alu	SINE	AluYb8
8620	1	14284776	14284993	218	MseI-[AA]SmaI	5183	14284993	11920	repeat	Alu	SINE	AluY
8633	1	14327371	14327668	298	SmaI[TT]-MseI	5189	14327370	11944	repeat	Alu	SINE	AluYa5
8635	1	14342069	14342543	475	SmaI[TT]-MseI	5190	14342068	11950	repeat	Alu	SINE	AluSq
8638	1	14378064	14378259	196	MseI-[AA]SmaI	5192	14378259	11976	repeat	Alu	SINE	AluJb
8644	1	14402450	14402700	251	MseI-[AA]SmaI	5195	14402700	11993	repeat	Alu	SINE	AluSc8
8647	1	14418679	14418896	218	SmaI[TT]-MseI	5196	14418678	12001	repeat	Alu	SINE	AluY
8652	1	14453301	14453525	225	MseI-[AA]SmaI	5199	14453525	12018	repeat	Alu	SINE	AluSx1
8655	1	14501692	14501911	220	SmaI[TT]-MseI	5200	14501691	12049	repeat	Alu	SINE	AluY
8661	1	14537809	14538028	220	SmaI[TT]-MseI	5203	14537808	12063	repeat	Alu	SINE	AluY
8663	1	14566049	14566372	324	SmaI[TT]-MseI	5204	14566048	12075	repeat	Alu	SINE	AluSp
8667	1	14584804	14585082	279	SmaI[TT]-MseI	5206	14584803	12085	repeat	Alu	SINE	AluY
8670	1	14598971	14599277	307	MseI-[AA]SmaI	5208	14599277	12094	repeat	Alu	SINE	AluSx3
8672	1	14606562	14606790	229	MseI-[AA]SmaI	5209	14606790	12101	repeat	Alu	SINE	AluSc8
8679	1	14667476	14667660	185	SmaI[TT]-MseI	5212	14667475	12134	repeat	Alu	SINE	AluSx
8680	1	14669337	14669560	224	MseI-[AA]SmaI	5213	14669560	12136	repeat	Alu	SINE	AluSx
8684	1	14677759	14677978	220	MseI-[AA]SmaI	5215	14677978	12142	repeat	Alu	SINE	AluSc
8695	1	14702030	14702308	279	MseI-[AA]SmaI	5221	14702308	12152	repeat	Alu	SINE	AluY
8699	1	14722380	14722588	209	MseI-[AA]SmaI	5223	14722588	12157	repeat	Alu	SINE	AluSg
8701	1	14744188	14744416	229	MseI-[AA]SmaI	5224	14744416	12175	repeat	Alu	SINE	AluY
8709	1	14759824	14760280	457	MseI-[AA]SmaI	5228	14760280	12188	repeat	Alu	SINE	AluSx
8711	1	14762447	14762649	203	MseI-[AA]SmaI	5229	14762649	12191	repeat	Alu	SINE	AluSq2
8714	1	14771615	14771835	221	SmaI[TT]-MseI	5230	14771614	12199	repeat	Alu	SINE	AluSx
8716	1	14779545	14779844	300	SmaI[TT]-MseI	5231	14779544	12207	repeat	Alu	SINE	AluY
8717	1	14783247	14783500	254	MseI-[AA]SmaI	5232	14783500	12209	repeat	Alu	SINE	AluSz6
8723	1	14834296	14834387	92	MseI-[AA]SmaI	5235	14834387	12236	repeat	Alu	SINE	AluYc
8725	1	14840461	14840745	285	MseI-[AA]SmaI	5236	14840745	12240	repeat	Alu	SINE	AluY
8727	1	14863018	14863302	285	MseI-[AA]SmaI	5237	14863302	12257	repeat	Alu	SINE	AluSq2
8734	1	14874172	14874582	411	SmaI[TT]-MseI	5240	14874171	12265	repeat	Alu	SINE	AluY
8736	1	14890459	14890592	134	SmaI[TT]-MseI	5241	14890458	12279	repeat	Alu	SINE	AluSx1
8737	1	14899764	14899866	103	MseI-[AA]SmaI	5242	14899866	12285	repeat	Alu	SINE	AluSx3
8743	1	14921081	14921564	484	MseI-[AA]SmaI	5245	14921564	12307	repeat	Alu	SINE	AluSg7
8753	1	14936797	14937035	239	SmaI[TT]-MseI	5251	14936796	12317	repeat	Alu	SINE	AluY
8755	1	14941273	14941390	118	SmaI[TT]-MseI	5252	14941272	NA	NULL	Unique	NULL	NULL
8756	1	14941565	14942046	482	MseI-[AA]SmaI	5253	14942046	12325	repeat	Alu	SINE	AluSz6
8762	1	14955436	14955648	213	SmaI[TT]-MseI	5256	14955435	12339	repeat	Alu	SINE	AluSx1
8763	1	14968631	14968820	190	MseI-[AA]SmaI	5257	14968820	12349	repeat	Alu	SINE	AluSc8
8794	1	15056673	15056956	284	SmaI[TT]-MseI	5272	15056672	12422	repeat	Alu	SINE	AluSg
8796	1	15060893	15060974	82	SmaI[TT]-MseI	5273	15060892	12429	repeat	Alu	SINE	AluSp
8798	1	15061649	15062335	687	SmaI[TT]-MseI	5274	15061648	12431	repeat	Alu	SINE	AluYk4
8805	1	15088366	15089145	780	MseI-[AA]SmaI	5278	15089145	12459	repeat	Alu	SINE	AluY
8810	1	15095944	15096210	267	SmaI[TT]-MseI	5280	15095943	12464	repeat	Alu	SINE	AluSq2
8811	1	15097887	15098246	360	MseI-[AA]SmaI	5281	15098246	12465	repeat	Alu	SINE	AluSx1
8814	1	15103590	15103817	228	SmaI[TT]-MseI	5282	15103589	12476	repeat	Alu	SINE	AluY
8826	1	15128273	15128824	552	SmaI[TT]-[AA]SmaI	5289	15128272	12504	repeat	Alu	SINE	AluY
8828	1	15130751	15131028	278	MseI-[AA]SmaI	5291	15131028	3259738	repeat	ERV	LTR	MLT1K
8831	1	15134886	15135256	371	SmaI[TT]-MseI	5292	15134885	12512	repeat	Alu	SINE	AluSz
8835	1	15140816	15141402	587	SmaI[TT]-MseI	5294	15140815	12519	repeat	Alu	SINE	AluSg
8838	1	15167481	15167826	346	MseI-[AA]SmaI	5296	15167826	12542	repeat	Alu	SINE	AluYc3
8840	1	15173354	15173409	56	MseI-[AA]SmaI	5297	15173409	12545	repeat	MIR	SINE	MIRb
8848	1	15190693	15190982	290	MseI-[AA]SmaI	5301	15190982	12568	repeat	Alu	SINE	AluSx1
8854	1	15201502	15201751	250	MseI-[AA]SmaI	5304	15201751	12579	repeat	Alu	SINE	AluSp
8856	1	15210336	15210812	477	MseI-[AA]SmaI	5305	15210812	12593	repeat	Alu	SINE	AluSc
8863	1	15217433	15217980	548	SmaI[TT]-MseI	5308	15217432	12599	repeat	Alu	SINE	AluY
8867	1	15222644	15222864	221	SmaI[TT]-MseI	5310	15222643	12603	repeat	Alu	SINE	AluSc
8871	1	15228815	15229039	225	SmaI[TT]-MseI	5312	15228814	12610	repeat	Alu	SINE	AluY
8875	1	15242759	15242981	223	SmaI[TT]-MseI	5314	15242758	12641	repeat	Alu	SINE	AluSx
8876	1	15249034	15249212	179	MseI-[AA]SmaI	5315	15249212	12648	repeat	Alu	SINE	AluSx1
8891	1	15260437	15260664	228	SmaI[TT]-MseI	5325	15260436	12660	repeat	Alu	SINE	AluY
8892	1	15264729	15264962	234	MseI-[AA]SmaI	5326	15264962	12665	repeat	Alu	SINE	AluSq
8898	1	15267505	15267941	437	SmaI[TT]-MseI	5329	15267504	12669	repeat	Alu	SINE	AluSx
8899	1	15270099	15270494	396	MseI-[AA]SmaI	5330	15270494	12671	repeat	Alu	SINE	AluSx
8904	1	15272927	15273063	137	SmaI[TT]-MseI	5332	15272926	12675	repeat	Alu	SINE	AluY
8907	1	15282474	15283026	553	MseI-[AA]SmaI	5334	15283026	12686	repeat	Alu	SINE	AluSq
8915	1	15298271	15298299	29	SmaI[TT]-MseI	5338	15298270	12699	repeat	Alu	SINE	AluYc
8918	1	15302380	15302452	73	MseI-[AA]SmaI	5340	15302452	12703	repeat	Alu	SINE	AluY
8922	1	15305494	15306328	835	SmaI[TT]-MseI	5342	15305493	12707	repeat	Alu	SINE	AluSx1
8923	1	15309874	15310362	489	MseI-[AA]SmaI	5343	15310362	12714	repeat	Alu	SINE	AluSq2
8933	1	15319233	15319447	215	SmaI[TT]-MseI	5348	15319232	12726	repeat	Alu	SINE	AluSx1
8937	1	15323830	15324377	548	SmaI[TT]-MseI	5350	15323829	12731	repeat	Alu	SINE	AluSx
8952	1	15358472	15359369	898	MseI-[AA]SmaI	5358	15359369	12785	repeat	Alu	SINE	AluSx1
8962	1	15367877	15368455	579	SmaI[TT]-MseI	5363	15367876	12797	repeat	Alu	SINE	AluSp
8963	1	15372501	15372718	218	MseI-[AA]SmaI	5364	15372718	12806	repeat	Alu	SINE	AluSx1
8967	1	15381592	15381897	306	MseI-[AA]SmaI	5366	15381897	12817	repeat	Alu	SINE	AluSz
8969	1	15385222	15385442	221	MseI-[AA]SmaI	5367	15385442	12823	repeat	Alu	SINE	AluSg
8974	1	15395241	15395341	101	SmaI[TT]-MseI	5369	15395240	NA	NULL	Unique	NULL	NULL
8975	1	15395999	15396047	49	MseI-[AA]SmaI	5370	15396047	12829	repeat	Alu	SINE	AluYc
9004	1	15458725	15459212	488	SmaI[TT]-MseI	5386	15458724	12896	repeat	Alu	SINE	AluSx
9006	1	15465155	15465550	396	SmaI[TT]-MseI	5387	15465154	12902	repeat	Alu	SINE	AluSx1
9015	1	15488031	15488349	319	MseI-[AA]SmaI	5394	15488349	12925	repeat	Alu	SINE	AluSc
9018	1	15497318	15497420	103	SmaI[TT]-MseI	5395	15497317	12935	repeat	Alu	SINE	AluY
9022	1	15517377	15517903	527	SmaI[TT]-MseI	5397	15517376	12956	repeat	Alu	SINE	AluSc8
9024	1	15519044	15519260	217	SmaI[TT]-MseI	5398	15519043	12958	repeat	Alu	SINE	AluSg7
9028	1	15525006	15525807	802	SmaI[TT]-MseI	5400	15525005	12964	repeat	Alu	SINE	AluSx1
9039	1	15555192	15555415	224	MseI-[AA]SmaI	5406	15555415	12991	repeat	Alu	SINE	AluY
9041	1	15555742	15555979	238	MseI-[AA]SmaI	5407	15555979	12992	repeat	Alu	SINE	AluSz
9044	1	15562203	15562273	71	SmaI[TT]-MseI	5408	15562202	12997	repeat	Alu	SINE	AluSx1
9045	1	15564166	15564667	502	MseI-[AA]SmaI	5409	15564667	12998	repeat	Alu	SINE	AluSg
9049	1	15567984	15568653	670	MseI-[AA]SmaI	5411	15568653	13004	repeat	Alu	SINE	AluSg
9058	1	15585175	15585262	88	SmaI[TT]-MseI	5415	15585174	13018	repeat	Alu	SINE	AluSx
9059	1	15597239	15597559	321	MseI-[AA]SmaI	5416	15597559	13033	repeat	Alu	SINE	AluY
9064	1	15601552	15601799	248	SmaI[TT]-MseI	5418	15601551	13038	repeat	Alu	SINE	AluY
9065	1	15602965	15603222	258	MseI-[AA]SmaI	5419	15603222	13040	repeat	Alu	SINE	AluSz6
9069	1	15619520	15620138	619	MseI-[AA]SmaI	5421	15620138	13060	repeat	Alu	SINE	AluSg
9073	1	15620983	15621121	139	SmaI[TT]-MseI	5423	15620982	13061	repeat	Alu	SINE	AluSx1
9075	1	15627419	15627637	219	SmaI[TT]-MseI	5424	15627418	13069	repeat	Alu	SINE	AluSq2
9081	1	15634320	15634717	398	SmaI[TT]-MseI	5427	15634319	13077	repeat	Alu	SINE	AluY
9086	1	15642075	15642381	307	SmaI[TT]-MseI	5430	15642074	13083	repeat	Alu	SINE	AluY
9087	1	15643380	15643611	232	MseI-[AA]SmaI	5431	15643611	13084	repeat	Alu	SINE	AluSx1
9098	1	15666415	15666621	207	SmaI[TT]-MseI	5436	15666414	13105	repeat	Alu	SINE	AluSx1
9099	1	15666622	15667602	981	MseI-[AA]SmaI	5437	15667602	13106	repeat	Alu	SINE	AluSx1
9106	1	15674039	15674288	250	SmaI[TT]-MseI	5440	15674038	13114	repeat	Alu	SINE	AluSx3
9110	1	15679189	15679463	275	SmaI[TT]-MseI	5442	15679188	NA	NULL	Unique	NULL	NULL
9111	1	15681124	15681629	506	MseI-[AA]SmaI	5443	15681629	13123	repeat	Alu	SINE	AluSx
9113	1	15686201	15686370	170	MseI-[AA]SmaI	5444	15686370	13128	repeat	Alu	SINE	AluY
9115	1	15687938	15688424	487	MseI-[AA]SmaI	5445	15688424	13130	repeat	Alu	SINE	AluSc
9119	1	15693518	15693916	399	MseI-[AA]SmaI	5447	15693916	13138	repeat	Alu	SINE	AluSx
9122	1	15694561	15694664	104	SmaI[TT]-MseI	5448	15694560	13139	repeat	Alu	SINE	AluSz
9123	1	15699708	15699932	225	MseI-[AA]SmaI	5449	15699932	13145	repeat	Alu	SINE	AluSx3
9125	1	15704446	15704705	260	MseI-[AA]SmaI	5450	15704705	13155	repeat	Alu	SINE	AluSz6
9135	1	15721443	15721734	292	MseI-[AA]SmaI	5455	15721734	13174	repeat	Alu	SINE	AluY
9138	1	15724623	15724697	75	MseI-[AA]SmaI	5457	15724697	13179	repeat	Alu	SINE	AluSx
9152	1	15744579	15744649	71	SmaI[TT]-MseI	5466	15744578	13198	repeat	Alu	SINE	AluSz
9157	1	15751560	15751945	386	MseI-[AA]SmaI	5469	15751945	13211	repeat	Alu	SINE	AluSz
9162	1	15755214	15755600	387	MseI-[AA]SmaI	5472	15755600	NA	NULL	Unique	NULL	NULL
9166	1	15761152	15761511	360	SmaI[TT]-MseI	5474	15761151	13223	repeat	Alu	SINE	AluSx1
9186	1	15797169	15797388	220	SmaI[TT]-MseI	5484	15797168	13293	repeat	Alu	SINE	AluSx
9192	1	15816462	15816677	216	SmaI[TT]-MseI	5487	15816461	13324	repeat	Alu	SINE	AluSx
9204	1	15846950	15847576	627	MseI-[AA]SmaI	5494	15847576	13370	repeat	Alu	SINE	AluY
9215	1	15860688	15861144	457	MseI-[AA]SmaI	5500	15861144	13386	repeat	Alu	SINE	AluSx3
9218	1	15863439	15863660	222	SmaI[TT]-MseI	5501	15863438	13390	repeat	Alu	SINE	AluSx1
9219	1	15864597	15864814	218	MseI-[AA]SmaI	5502	15864814	13392	repeat	Alu	SINE	AluSg
9222	1	15877458	15877699	242	SmaI[TT]-MseI	5503	15877457	13410	repeat	Alu	SINE	AluSx1
9226	1	15879823	15880058	236	SmaI[TT]-MseI	5505	15879822	13416	repeat	Alu	SINE	AluSq
9230	1	15882823	15883073	251	SmaI[TT]-MseI	5507	15882822	13422	repeat	Alu	SINE	AluSx
9231	1	15889701	15890269	569	MseI-[AA]SmaI	5508	15890269	13433	repeat	Alu	SINE	AluY
9234	1	15898948	15899417	470	SmaI[TT]-MseI	5509	15898947	13441	repeat	Alu	SINE	AluSz
9238	1	15903338	15903558	221	SmaI[TT]-MseI	5511	15903337	13449	repeat	Alu	SINE	AluYk4
9241	1	15908447	15908685	239	MseI-[AA]SmaI	5513	15908685	13460	repeat	Alu	SINE	AluSq2
9248	1	15912248	15912468	221	MseI-[AA]SmaI	5518	15912468	13467	repeat	Alu	SINE	AluY
9251	1	15916037	15916304	268	MseI-[AA]SmaI	5520	15916304	13474	repeat	Alu	SINE	AluSz6
9256	1	15927797	15928014	218	MseI-[AA]SmaI	5523	15928014	13496	repeat	Alu	SINE	AluSg4
9258	1	15929112	15929420	309	MseI-[AA]SmaI	5524	15929420	13499	repeat	Alu	SINE	AluSg7
9260	1	15933241	15933937	697	MseI-[AA]SmaI	5525	15933937	13507	repeat	Alu	SINE	AluY
9262	1	15939085	15939301	217	MseI-[AA]SmaI	5526	15939301	13520	repeat	Alu	SINE	AluSq2
9268	1	15946050	15946328	279	SmaI[TT]-MseI	5529	15946049	13531	repeat	Alu	SINE	AluY
9272	1	15956320	15956530	211	SmaI[TT]-MseI	5531	15956319	13543	repeat	Alu	SINE	AluSq2
9274	1	15957432	15957650	219	SmaI[TT]-MseI	5532	15957431	13544	repeat	Alu	SINE	AluY
9277	1	15963956	15964177	222	SmaI[TT]-MseI	5534	15963955	13556	repeat	Alu	SINE	AluSx
9278	1	15968937	15969486	550	MseI-[AA]SmaI	5535	15969486	13566	repeat	Alu	SINE	AluY
9281	1	15971478	15972212	735	SmaI[TT]-MseI	5536	15971477	13569	repeat	Alu	SINE	AluSz
9284	1	15974161	15974383	223	MseI-[AA]SmaI	5538	15974383	13573	repeat	Alu	SINE	AluSx3
9292	1	15993406	15993626	221	MseI-[AA]SmaI	5542	15993626	13597	repeat	Alu	SINE	AluSx4
9294	1	15996762	15997123	362	MseI-[AA]SmaI	5543	15997123	13600	repeat	Alu	SINE	AluSc5
9296	1	15998491	15999103	613	MseI-[AA]SmaI	5544	15999103	13604	repeat	Alu	SINE	AluSg
9298	1	15999472	15999768	297	SmaI[TT]-MseI	5545	15999471	13606	repeat	Alu	SINE	AluSq2
9299	1	16001629	16001852	224	MseI-[AA]SmaI	5546	16001852	13612	repeat	Alu	SINE	AluSq2
9312	1	16027988	16028210	223	MseI-[AA]SmaI	5555	16028210	13657	repeat	Alu	SINE	AluY
9318	1	16036129	16036781	653	SmaI[TT]-MseI	5558	16036128	13669	repeat	MIR	SINE	MIRb
9320	1	16040224	16040748	525	SmaI[TT]-MseI	5559	16040223	13679	repeat	Alu	SINE	AluY
9324	1	16048732	16048952	221	SmaI[TT]-MseI	5561	16048731	13687	repeat	Alu	SINE	AluSx
9327	1	16049944	16050902	959	MseI-[AA]SmaI	5563	16050902	13689	repeat	Alu	SINE	AluSc5
9368	1	16078995	16079176	182	MseI-[AA]SmaI	5590	16079176	13715	repeat	Alu	SINE	AluY
9393	1	16097835	16098208	374	SmaI[TT]-MseI	5605	16097834	13750	repeat	Alu	SINE	AluSx1
9394	1	16099614	16099802	189	MseI-[AA]SmaI	5606	16099802	13754	repeat	Alu	SINE	AluSx
9401	1	16108307	16108528	222	SmaI[TT]-MseI	5609	16108306	13771	repeat	Alu	SINE	AluY
9403	1	16109387	16109797	411	SmaI[TT]-MseI	5610	16109386	13774	repeat	Alu	SINE	AluSx1
9406	1	16110164	16110600	437	SmaI[TT]-[AA]SmaI	5612	16110163	13776	repeat	Alu	SINE	AluY
9410	1	16111529	16112054	526	MseI-[AA]SmaI	5615	16112054	13779	repeat	Alu	SINE	AluSz6
9417	1	16123659	16123882	224	SmaI[TT]-MseI	5619	16123658	13804	repeat	Alu	SINE	AluY
9423	1	16138361	16138643	283	SmaI[TT]-MseI	5622	16138360	13836	repeat	Alu	SINE	AluSx
9427	1	16143574	16143652	79	SmaI[TT]-MseI	5624	16143573	13853	repeat	Alu	SINE	AluSq2
9428	1	16144365	16144579	215	MseI-[AA]SmaI	5625	16144579	13854	repeat	Alu	SINE	AluSx3
9430	1	16145727	16145945	219	MseI-[AA]SmaI	5626	16145945	13858	repeat	Alu	SINE	AluY
9433	1	16148300	16148512	213	SmaI[TT]-MseI	5627	16148299	13866	repeat	Alu	SINE	AluY
9437	1	16152775	16153531	757	SmaI[TT]-MseI	5629	16152774	13880	repeat	Alu	SINE	AluSg
9438	1	16153952	16154145	194	MseI-[AA]SmaI	5630	16154145	13883	repeat	Alu	SINE	AluSx3
9449	1	16163068	16163404	337	SmaI[TT]-MseI	5636	16163067	13898	repeat	Alu	SINE	AluSx1
9450	1	16163434	16163775	342	MseI-[AA]SmaI	5637	16163775	5233697	island	CpGi	NULL	NULL
9455	1	16167230	16167467	238	SmaI[TT]-MseI	5639	16167229	13909	repeat	Alu	SINE	AluSx
9457	1	16170046	16170256	211	SmaI[TT]-MseI	5640	16170045	13918	repeat	Alu	SINE	AluSc8
9459	1	16171146	16171368	223	SmaI[TT]-MseI	5641	16171145	13919	repeat	Alu	SINE	AluSx
9460	1	16172055	16172265	211	MseI-[AA]SmaI	5642	16172265	13921	repeat	Alu	SINE	AluSc
9468	1	16183945	16184323	379	SmaI[TT]-MseI	5647	16183944	13936	repeat	Alu	SINE	AluSz
9469	1	16185138	16185295	158	MseI-[AA]SmaI	5648	16185295	13940	repeat	Alu	SINE	AluJb
9472	1	16186500	16186709	210	SmaI[TT]-MseI	5649	16186499	13943	repeat	Alu	SINE	AluY
9474	1	16187720	16187963	244	SmaI[TT]-MseI	5650	16187719	13948	repeat	Alu	SINE	AluSg
9478	1	16192942	16193164	223	SmaI[TT]-MseI	5652	16192941	13960	repeat	Alu	SINE	AluY
9484	1	16206259	16206477	219	SmaI[TT]-MseI	5655	16206258	13977	repeat	Alu	SINE	AluY
9488	1	16213869	16214101	233	SmaI[TT]-MseI	5657	16213868	13986	repeat	Alu	SINE	AluY
9490	1	16216302	16216592	291	SmaI[TT]-MseI	5658	16216301	13992	repeat	Alu	SINE	AluSx1
9492	1	16216820	16217074	255	SmaI[TT]-MseI	5659	16216819	13993	repeat	Alu	SINE	AluSg
9494	1	16221511	16221723	213	SmaI[TT]-MseI	5660	16221510	14002	repeat	Alu	SINE	AluSp
9496	1	16231810	16232062	253	SmaI[TT]-MseI	5661	16231809	14023	repeat	Alu	SINE	AluSq
9498	1	16232161	16232372	212	SmaI[TT]-MseI	5662	16232160	14024	repeat	Alu	SINE	AluSc
9499	1	16238036	16238380	345	MseI-[AA]SmaI	5663	16238380	14034	repeat	Alu	SINE	AluSx
9502	1	16244807	16245026	220	SmaI[TT]-MseI	5664	16244806	14043	repeat	Alu	SINE	AluSq2
9510	1	16264692	16265013	322	SmaI[TT]-MseI	5668	16264691	14056	repeat	Alu	SINE	AluSz
9521	1	16281264	16281573	310	MseI-[AA]SmaI	5677	16281573	14062	repeat	Alu	SINE	AluSz
9526	1	16296980	16297496	517	SmaI[TT]-MseI	5679	16296979	14081	repeat	Alu	SINE	AluSx1
9538	1	16303612	16303894	283	SmaI[TT]-MseI	5687	16303611	14090	repeat	Alu	SINE	AluY
9539	1	16307061	16307304	244	MseI-[AA]SmaI	5688	16307304	14095	repeat	Alu	SINE	AluSz
9550	1	16326144	16326361	218	SmaI[TT]-MseI	5693	16326143	14112	repeat	Alu	SINE	AluSp
9608	1	16413339	16413563	225	MseI-[AA]SmaI	5729	16413563	14225	repeat	Alu	SINE	AluSq
9622	1	16425249	16425471	223	SmaI[TT]-MseI	5737	16425248	14243	repeat	Alu	SINE	AluSx
9629	1	16449677	16450090	414	MseI-[AA]SmaI	5741	16450090	14273	repeat	Alu	SINE	AluSc
9643	1	16474460	16474686	227	SmaI[TT]-MseI	5748	16474459	14303	repeat	Alu	SINE	AluSz6
9648	1	16480532	16480820	289	MseI-[AA]SmaI	5751	16480820	5233728	shore	Unique	NULL	NULL
9661	1	16487368	16487943	576	SmaI[TT]-MseI	5761	16487367	14319	repeat	Alu	SINE	AluSz
9666	1	16489349	16490046	698	MseI-[AA]SmaI	5764	16490046	14324	repeat	Alu	SINE	AluSq2
9673	1	16497410	16497486	77	SmaI[TT]-MseI	5768	16497409	14340	repeat	Alu	SINE	AluJr
9677	1	16501392	16501593	202	MseI-[AA]SmaI	5771	16501593	NA	NULL	Unique	NULL	NULL
9680	1	16504790	16505051	262	SmaI[TT]-MseI	5772	16504789	14352	repeat	Alu	SINE	AluSx1
9685	1	16509306	16509559	254	MseI-[AA]SmaI	5775	16509559	14361	repeat	Alu	SINE	AluSx1
9691	1	16512164	16512660	497	SmaI[TT]-MseI	5778	16512163	14365	repeat	Alu	SINE	AluYc
9706	1	16542034	16542275	242	SmaI[TT]-MseI	5787	16542033	14405	repeat	Alu	SINE	AluSp
9711	1	16549506	16549769	264	SmaI[TT]-MseI	5790	16549505	14414	repeat	Alu	SINE	AluSc
9719	1	16561316	16561532	217	SmaI[TT]-MseI	5794	16561315	14429	repeat	Alu	SINE	AluSp
9726	1	16589964	16590142	179	MseI-[AA]SmaI	5798	16590142	14466	repeat	Alu	SINE	AluSq2
9728	1	16595162	16595404	243	MseI-[AA]SmaI	5799	16595404	14471	repeat	Alu	SINE	AluSp
9734	1	16604554	16604775	222	MseI-[AA]SmaI	5802	16604775	14491	repeat	Alu	SINE	AluSp
9737	1	16608245	16609031	787	SmaI[TT]-MseI	5803	16608244	14500	repeat	Alu	SINE	AluSz
9739	1	16610086	16610301	216	SmaI[TT]-MseI	5804	16610085	14505	repeat	Alu	SINE	AluSg7
9740	1	16611035	16611387	353	MseI-[AA]SmaI	5805	16611387	14507	repeat	Alu	SINE	AluSp
9742	1	16614437	16614849	413	MseI-[AA]SmaI	5806	16614849	14513	repeat	Alu	SINE	AluSc
9744	1	16615160	16615377	218	MseI-[AA]SmaI	5807	16615377	14514	repeat	Alu	SINE	AluSz
9746	1	16622769	16623069	301	MseI-[AA]SmaI	5808	16623069	14525	repeat	Alu	SINE	AluSg
9748	1	16623951	16624286	336	MseI-[AA]SmaI	5809	16624286	14527	repeat	Alu	SINE	AluY
9750	1	16624421	16624645	225	MseI-[AA]SmaI	5810	16624645	14528	repeat	Alu	SINE	AluSz
9757	1	16636239	16636614	376	MseI-[AA]SmaI	5814	16636614	14557	repeat	Alu	SINE	AluY
9763	1	16657356	16657832	477	MseI-[AA]SmaI	5817	16657832	14597	repeat	Alu	SINE	AluY
9767	1	16663163	16663404	242	MseI-[AA]SmaI	5819	16663404	14609	repeat	Alu	SINE	AluSq2
9769	1	16666459	16666595	137	MseI-[AA]SmaI	5820	16666595	14618	repeat	Alu	SINE	AluY
9771	1	16672859	16673107	249	MseI-[AA]SmaI	5821	16673107	14634	repeat	Alu	SINE	AluY
9773	1	16674795	16675120	326	MseI-[AA]SmaI	5822	16675120	14639	repeat	Alu	SINE	AluSx1
9781	1	16681940	16682012	73	MseI-[AA]SmaI	5828	16682012	14648	repeat	Alu	SINE	AluSp
9789	1	16690731	16690961	231	SmaI[TT]-MseI	5832	16690730	14677	repeat	Alu	SINE	AluSg
9796	1	16698050	16698262	213	SmaI[TT]-MseI	5836	16698049	14690	repeat	Alu	SINE	AluY
9798	1	16701466	16701685	220	SmaI[TT]-MseI	5837	16701465	14695	repeat	Alu	SINE	AluSg
9800	1	16707057	16707421	365	SmaI[TT]-MseI	5838	16707056	14709	repeat	Alu	SINE	AluSp
9802	1	16708776	16709008	233	SmaI[TT]-MseI	5839	16708775	14715	repeat	Alu	SINE	AluSx
9804	1	16709454	16709810	357	SmaI[TT]-MseI	5840	16709453	14717	repeat	Alu	SINE	AluSx1
9808	1	16715853	16716399	547	SmaI[TT]-MseI	5842	16715852	14725	repeat	Alu	SINE	AluY
9812	1	16726615	16726863	249	SmaI[TT]-MseI	5844	16726614	14734	repeat	Alu	SINE	AluSq2
9818	1	16732708	16732792	85	SmaI[TT]-MseI	5847	16732707	14748	repeat	Alu	SINE	AluSx
9822	1	16740654	16740889	236	SmaI[TT]-MseI	5849	16740653	14765	repeat	Alu	SINE	AluSz6
9824	1	16742148	16742740	593	SmaI[TT]-MseI	5850	16742147	14768	repeat	Alu	SINE	AluY
9825	1	16743010	16743097	88	MseI-[AA]SmaI	5851	16743097	14769	repeat	Alu	SINE	AluSz
9827	1	16746287	16746936	650	MseI-[AA]SmaI	5852	16746936	14776	repeat	Alu	SINE	AluSc8
9831	1	16765698	16766003	306	MseI-[AA]SmaI	5854	16766003	14812	repeat	Alu	SINE	AluSx1
9837	1	16782957	16783876	920	MseI-[AA]SmaI	5857	16783876	14837	repeat	Alu	SINE	AluSq
9846	1	16836475	16836695	221	MseI-[AA]SmaI	5862	16836695	14929	repeat	Alu	SINE	AluSg
9849	1	16839280	16839610	331	SmaI[TT]-MseI	5863	16839279	14933	repeat	Alu	SINE	AluSx
9850	1	16845073	16845295	223	MseI-[AA]SmaI	5864	16845295	14936	repeat	Alu	SINE	AluSx
9854	1	16861672	16861796	125	MseI-[AA]SmaI	5866	16861796	5233766	island	CpGi	NULL	NULL
9869	1	16906329	16906507	179	SmaI[TT]-MseI	5875	16906328	14962	repeat	Alu	SINE	AluSx1
9871	1	16912625	16912803	179	SmaI[TT]-MseI	5876	16912624	14968	repeat	Alu	SINE	AluSx1
9885	1	16961094	16961181	88	MseI-[AA]SmaI	5884	16961181	15017	repeat	Alu	SINE	AluSx
9902	1	17000910	17001132	223	MseI-[AA]SmaI	5893	17001132	15049	repeat	Alu	SINE	AluYb8
9929	1	17034908	17035122	215	SmaI[TT]-MseI	5912	17034907	15075	repeat	Alu	SINE	AluSx3
9931	1	17035606	17035629	24	SmaI[TT]-MseI	5913	17035605	3260910	repeat	Rest	DNA	MER53
9937	1	17050923	17051016	94	SmaI[TT]-MseI	5916	17050922	15092	repeat	Alu	SINE	AluSx
9954	1	17075582	17076023	442	SmaI[TT]-MseI	5926	17075581	5233808	island	CpGi	NULL	NULL
9962	1	17092862	17093136	275	SmaI[TT]-MseI	5930	17092861	NA	NULL	Unique	NULL	NULL
9980	1	17199127	17199249	123	SmaI[TT]-MseI	5940	17199126	5233820	island	CpGi	NULL	NULL
9981	1	17207350	17207576	227	MseI-[AA]SmaI	5941	17207576	15148	repeat	Alu	SINE	AluY
9989	1	17218041	17218261	221	SmaI[TT]-MseI	5945	17218040	15153	repeat	Alu	SINE	AluSx
9991	1	17226552	17226771	220	SmaI[TT]-MseI	5946	17226551	15159	repeat	Alu	SINE	AluSg
9992	1	17226811	17227014	204	MseI-[AA]SmaI	5947	17227014	15160	repeat	Alu	SINE	AluSx1
9995	1	17230607	17231084	478	SmaI[TT]-MseI	5948	17230606	15165	repeat	Alu	SINE	AluYc3
9997	1	17237306	17237577	272	SmaI[TT]-MseI	5949	17237305	15171	repeat	Alu	SINE	AluSg7
10005	1	17255002	17255222	221	MseI-[AA]SmaI	5954	17255222	15198	repeat	Alu	SINE	AluSx3
10009	1	17267772	17268151	380	MseI-[AA]SmaI	5956	17268151	15225	repeat	Alu	SINE	AluY
10011	1	17269304	17269957	654	MseI-[AA]SmaI	5957	17269957	15231	repeat	Alu	SINE	AluY
10021	1	17284031	17284253	223	SmaI[TT]-MseI	5962	17284030	15255	repeat	Alu	SINE	AluSq
10043	1	17317538	17318100	563	SmaI[TT]-MseI	5976	17317537	15300	repeat	Alu	SINE	AluSx1
10052	1	17321251	17321468	218	SmaI[TT]-MseI	5981	17321250	15308	repeat	Alu	SINE	AluSx3
10062	1	17343165	17343810	646	MseI-[AA]SmaI	5987	17343810	15352	repeat	Alu	SINE	AluY
10067	1	17352953	17353171	219	SmaI[TT]-MseI	5989	17352952	15364	repeat	Alu	SINE	AluSz
10071	1	17357270	17357466	197	SmaI[TT]-MseI	5991	17357269	15371	repeat	Alu	SINE	AluSg
10073	1	17358787	17359232	446	SmaI[TT]-MseI	5992	17358786	15374	repeat	Alu	SINE	AluSx1
10074	1	17367876	17368081	206	MseI-[AA]SmaI	5993	17368081	15390	repeat	Alu	SINE	AluSx
10085	1	17381423	17381644	222	SmaI[TT]-MseI	6000	17381422	15414	repeat	Alu	SINE	AluSg7
10089	1	17384338	17384646	309	SmaI[TT]-MseI	6002	17384337	15420	repeat	Alu	SINE	AluY
10093	1	17402803	17403013	211	SmaI[TT]-MseI	6004	17402802	15444	repeat	Alu	SINE	AluSg
10110	1	17433031	17433482	452	SmaI[TT]-MseI	6013	17433030	15486	repeat	Alu	SINE	AluSx
10122	1	17453264	17453486	223	MseI-[AA]SmaI	6020	17453486	15506	repeat	Alu	SINE	AluY
10128	1	17472679	17472923	245	SmaI[TT]-MseI	6023	17472678	15527	repeat	Alu	SINE	AluSc
10136	1	17490697	17491203	507	SmaI[TT]-MseI	6028	17490696	NA	NULL	Unique	NULL	NULL
10137	1	17510915	17511237	323	MseI-[AA]SmaI	6029	17511237	15560	repeat	Alu	SINE	AluSx1
10144	1	17523600	17523712	113	SmaI[TT]-MseI	6032	17523599	1776916	repeat	Rest	LINE	L4
10178	1	17574523	17574611	89	MseI-[AA]SmaI	6050	17574611	15631	repeat	Alu	SINE	AluY
10184	1	17582809	17583451	643	MseI-[AA]SmaI	6053	17583451	15646	repeat	Alu	SINE	AluSx1
10201	1	17627832	17627960	129	MseI-[AA]SmaI	6062	17627960	15702	repeat	Alu	SINE	AluSq2
10206	1	17636880	17637044	165	MseI-[AA]SmaI	6065	17637044	15717	repeat	Alu	SINE	AluSz6
10209	1	17638113	17638421	309	SmaI[TT]-MseI	6066	17638112	15723	repeat	Alu	SINE	AluY
10214	1	17645274	17645363	90	SmaI[TT]-MseI	6069	17645273	15738	repeat	Alu	SINE	AluY
10217	1	17658250	17658337	88	MseI-[AA]SmaI	6071	17658337	15751	repeat	Alu	SINE	AluSx1
10233	1	17683756	17683961	206	SmaI[TT]-MseI	6079	17683755	15778	repeat	Alu	SINE	AluSx3
10234	1	17684129	17684350	222	MseI-[AA]SmaI	6080	17684350	15779	repeat	Alu	SINE	AluSg4
10240	1	17700080	17700565	486	SmaI[TT]-MseI	6083	17700079	15802	repeat	Alu	SINE	AluSq
10241	1	17711058	17711158	101	MseI-[AA]SmaI	6084	17711158	15823	repeat	Alu	SINE	AluSz
10251	1	17744855	17745077	223	MseI-[AA]SmaI	6089	17745077	15858	repeat	Alu	SINE	AluSc
10255	1	17748225	17748445	221	MseI-[AA]SmaI	6091	17748445	15862	repeat	Alu	SINE	AluSp
10261	1	17756534	17757208	675	MseI-[AA]SmaI	6094	17757208	15866	repeat	Alu	SINE	AluSx3
10264	1	17759167	17759378	212	MseI-[AA]SmaI	6096	17759378	15871	repeat	Alu	SINE	AluY
10270	1	17762154	17762338	185	MseI-[AA]SmaI	6099	17762338	15873	repeat	Alu	SINE	AluSq2
10284	1	17770672	17770718	47	MseI-[AA]SmaI	6108	17770718	15881	repeat	Alu	SINE	AluSq10
10286	1	17771681	17771898	218	MseI-[AA]SmaI	6109	17771898	15885	repeat	Alu	SINE	AluY
10293	1	17782256	17782886	631	MseI-[AA]SmaI	6113	17782886	15915	repeat	Alu	SINE	AluY
10296	1	17783407	17783620	214	SmaI[TT]-MseI	6114	17783406	15917	repeat	Alu	SINE	AluSz
10297	1	17784441	17784678	238	MseI-[AA]SmaI	6115	17784678	15921	repeat	Alu	SINE	AluSq2
10299	1	17784848	17785096	249	SmaI[TT]-MseI	6116	17784847	15922	repeat	Alu	SINE	AluSq2
10302	1	17788634	17788959	326	MseI-[AA]SmaI	6118	17788959	15932	repeat	Alu	SINE	AluY
10304	1	17793621	17793835	215	MseI-[AA]SmaI	6119	17793835	15946	repeat	Alu	SINE	AluSx
10307	1	17795583	17795879	297	SmaI[TT]-MseI	6120	17795582	15951	repeat	Alu	SINE	AluSx
10312	1	17801373	17801597	225	SmaI[TT]-MseI	6123	17801372	15965	repeat	Alu	SINE	AluSx4
10316	1	17805739	17806056	318	SmaI[TT]-MseI	6125	17805738	15976	repeat	Alu	SINE	AluSx
10321	1	17809107	17809878	772	SmaI[TT]-MseI	6128	17809106	15984	repeat	Alu	SINE	AluSg
10325	1	17811550	17811915	366	SmaI[TT]-MseI	6131	17811549	15992	repeat	Alu	SINE	AluY
10327	1	17816470	17817452	983	SmaI[TT]-MseI	6132	17816469	16002	repeat	Alu	SINE	AluSg
10328	1	17818571	17818831	261	MseI-[AA]SmaI	6133	17818831	16008	repeat	Alu	SINE	AluSx
10336	1	17839073	17839449	377	MseI-[AA]SmaI	6137	17839449	16058	repeat	Alu	SINE	AluSz6
10353	1	17867966	17868386	421	MseI-[AA]SmaI	6146	17868386	16117	repeat	Alu	SINE	AluSq2
10357	1	17878987	17879519	533	SmaI[TT]-MseI	6148	17878986	16134	repeat	Alu	SINE	AluSz
10385	1	17924690	17924847	158	SmaI[TT]-MseI	6163	17924689	16202	repeat	Alu	SINE	AluSz
10386	1	17927172	17927469	298	MseI-[AA]SmaI	6164	17927469	16206	repeat	Alu	SINE	AluSz
10394	1	17932882	17933109	228	SmaI[TT]-MseI	6168	17932881	16215	repeat	Alu	SINE	AluSx
10405	1	17951331	17951422	92	SmaI[TT]-MseI	6174	17951330	5233876	shore	Unique	NULL	NULL
10419	1	17976287	17977152	866	MseI-[AA]SmaI	6182	17977152	16256	repeat	Alu	SINE	AluSz
10424	1	17989900	17989972	73	MseI-[AA]SmaI	6185	17989972	16271	repeat	Alu	SINE	AluSz6
10439	1	18007372	18007657	286	SmaI[TT]-MseI	6193	18007371	16286	repeat	Alu	SINE	AluSx1
10458	1	18028881	18028989	109	MseI-[AA]SmaI	6205	18028989	NA	NULL	Unique	NULL	NULL
10468	1	18043399	18043636	238	SmaI[TT]-MseI	6210	18043398	16324	repeat	Alu	SINE	AluSz6
10487	1	18092831	18092900	70	MseI-[AA]SmaI	6220	18092900	16391	repeat	MIR	SINE	MIRc
10496	1	18127183	18127403	221	SmaI[TT]-MseI	6224	18127182	16426	repeat	Alu	SINE	AluSg
10506	1	18152829	18153067	239	SmaI[TT]-MseI	6229	18152828	5233880	island	CpGi	NULL	NULL
10510	1	18181469	18181692	224	SmaI[TT]-MseI	6231	18181468	16481	repeat	Alu	SINE	AluSx1
10512	1	18184074	18184423	350	SmaI[TT]-MseI	6232	18184073	16487	repeat	Alu	SINE	AluY
10515	1	18207282	18207369	88	MseI-[AA]SmaI	6234	18207369	16510	repeat	Alu	SINE	AluSg
10523	1	18221039	18221368	330	MseI-[AA]SmaI	6238	18221368	16528	repeat	Alu	SINE	AluSx
10528	1	18238092	18238162	71	SmaI[TT]-MseI	6240	18238091	16547	repeat	Alu	SINE	AluSc
10532	1	18249150	18249599	450	SmaI[TT]-MseI	6242	18249149	16559	repeat	Alu	SINE	AluY
10540	1	18264171	18264573	403	SmaI[TT]-MseI	6246	18264170	16581	repeat	Alu	SINE	AluY
10542	1	18265675	18265811	137	SmaI[TT]-MseI	6247	18265674	16584	repeat	Alu	SINE	AluSz
10545	1	18274602	18274690	89	MseI-[AA]SmaI	6249	18274690	16592	repeat	Alu	SINE	AluY
10560	1	18338770	18339533	764	SmaI[TT]-MseI	6256	18338769	16667	repeat	Alu	SINE	AluSp
10563	1	18343907	18343943	37	MseI-[AA]SmaI	6258	18343943	1777328	repeat	LINE	LINE	L2c
10570	1	18366473	18366689	217	SmaI[TT]-MseI	6261	18366472	16696	repeat	Alu	SINE	AluSz
10572	1	18368979	18369279	301	SmaI[TT]-MseI	6262	18368978	16698	repeat	Alu	SINE	AluY
10586	1	18389145	18389755	611	SmaI[TT]-MseI	6269	18389144	16719	repeat	Alu	SINE	AluY
10589	1	18398154	18398379	226	MseI-[AA]SmaI	6271	18398379	16727	repeat	Alu	SINE	AluYb8
10601	1	18435532	18435657	126	SmaI[TT]-MseI	6278	18435531	5233887	shore	Unique	NULL	NULL
10602	1	18436018	18436508	491	MseI-[AA]SmaI	6279	18436508	5233890	shore	Unique	NULL	NULL
10606	1	18454081	18454327	247	MseI-[AA]SmaI	6281	18454327	16774	repeat	Alu	SINE	AluJb
10620	1	18499485	18499706	222	MseI-[AA]SmaI	6288	18499706	16831	repeat	Alu	SINE	AluY
10627	1	18534969	18535209	241	SmaI[TT]-MseI	6291	18534968	16867	repeat	Alu	SINE	AluY
10637	1	18541330	18541546	217	SmaI[TT]-MseI	6296	18541329	16875	repeat	Alu	SINE	AluSc
10650	1	18613064	18613599	536	MseI-[AA]SmaI	6303	18613599	16932	repeat	Alu	SINE	AluYa5
10689	1	18764555	18764775	221	SmaI[TT]-MseI	6323	18764554	17090	repeat	Alu	SINE	AluSg4
10702	1	18798467	18798813	347	SmaI[TT]-MseI	6330	18798466	17131	repeat	Alu	SINE	AluSz
10703	1	18800484	18800745	262	MseI-[AA]SmaI	6331	18800745	17134	repeat	Alu	SINE	AluSx
10713	1	18820584	18820795	212	MseI-[AA]SmaI	6337	18820795	17149	repeat	Alu	SINE	AluSz
10718	1	18837127	18837351	225	SmaI[TT]-MseI	6339	18837126	17162	repeat	Alu	SINE	AluY
10745	1	18911486	18911874	389	MseI-[AA]SmaI	6354	18911874	17240	repeat	Alu	SINE	AluSz
10751	1	18922130	18922221	92	MseI-[AA]SmaI	6357	18922221	17253	repeat	Alu	SINE	AluSz
10753	1	18922620	18923414	795	MseI-[AA]SmaI	6358	18923414	17256	repeat	Alu	SINE	AluSx
10756	1	18925691	18926612	922	SmaI[TT]-MseI	6359	18925690	NA	NULL	Unique	NULL	NULL
10757	1	18927009	18927228	220	MseI-[AA]SmaI	6360	18927228	17261	repeat	Alu	SINE	AluSq
10763	1	18946911	18947439	529	MseI-[AA]SmaI	6363	18947439	17294	repeat	Alu	SINE	AluSx1
10792	1	18967140	18967748	609	SmaI[TT]-MseI	6381	18967139	5233911	shore	Unique	NULL	NULL
10793	1	18970295	18970377	83	MseI-[AA]SmaI	6382	18970377	5233913	island	CpGi	NULL	NULL
10811	1	19014929	19015332	404	MseI-[AA]SmaI	6392	19015332	17364	repeat	Alu	SINE	AluSz6
10817	1	19026148	19026364	217	SmaI[TT]-MseI	6395	19026147	17377	repeat	Alu	SINE	AluY
10818	1	19028066	19028757	692	MseI-[AA]SmaI	6396	19028757	17380	repeat	Alu	SINE	AluSz
10825	1	19041309	19041447	139	SmaI[TT]-MseI	6399	19041308	NA	NULL	Unique	NULL	NULL
10839	1	19062658	19062883	226	MseI-[AA]SmaI	6408	19062883	17414	repeat	Alu	SINE	AluSz6
10848	1	19098250	19098472	223	SmaI[TT]-MseI	6412	19098249	17451	repeat	Alu	SINE	AluY
10851	1	19103731	19104456	726	MseI-[AA]SmaI	6414	19104456	17459	repeat	MIR	SINE	MIR3
10854	1	19108585	19108725	141	MseI-[AA]SmaI	6416	19108725	17467	repeat	Alu	SINE	AluSz
10858	1	19117069	19117365	297	MseI-[AA]SmaI	6418	19117365	17475	repeat	Alu	SINE	AluJb
10894	1	19194136	19194206	71	SmaI[TT]-MseI	6436	19194135	17567	repeat	Alu	SINE	AluSz
10915	1	19218085	19218446	362	MseI-[AA]SmaI	6447	19218446	17594	repeat	Alu	SINE	AluSz
10928	1	19242311	19242543	233	MseI-[AA]SmaI	6456	19242543	17629	repeat	Alu	SINE	AluSz
10964	1	19297907	19298146	240	SmaI[TT]-MseI	6476	19297906	17709	repeat	Alu	SINE	AluSx
10965	1	19298193	19298525	333	MseI-[AA]SmaI	6477	19298525	17710	repeat	Alu	SINE	AluSc
10974	1	19327483	19327697	215	SmaI[TT]-MseI	6481	19327482	17743	repeat	Alu	SINE	AluY
10978	1	19335276	19335521	246	SmaI[TT]-MseI	6483	19335275	17751	repeat	Alu	SINE	AluSg
10981	1	19342860	19343081	222	MseI-[AA]SmaI	6485	19343081	17763	repeat	Alu	SINE	AluSc8
10983	1	19348658	19349171	514	MseI-[AA]SmaI	6486	19349171	17772	repeat	Alu	SINE	AluSx
10985	1	19354172	19354267	96	MseI-[AA]SmaI	6487	19354267	17777	repeat	Alu	SINE	AluSx1
10996	1	19377992	19378217	226	SmaI[TT]-MseI	6492	19377991	17803	repeat	Alu	SINE	AluSc
10997	1	19383271	19383647	377	MseI-[AA]SmaI	6493	19383647	17810	repeat	Alu	SINE	AluSx
11005	1	19404049	19404151	103	MseI-[AA]SmaI	6497	19404151	17829	repeat	Alu	SINE	AluSq2
11012	1	19417037	19417514	478	MseI-[AA]SmaI	6501	19417514	17838	repeat	Alu	SINE	AluSq2
11018	1	19457940	19458291	352	MseI-[AA]SmaI	6504	19458291	17864	repeat	Alu	SINE	AluSp
11020	1	19495164	19495396	233	MseI-[AA]SmaI	6505	19495396	17878	repeat	Alu	SINE	AluY
11026	1	19541238	19541718	481	MseI-[AA]SmaI	6509	19541718	17920	repeat	Alu	SINE	AluSx
11034	1	19561192	19562119	928	MseI-[AA]SmaI	6513	19562119	17949	repeat	Alu	SINE	AluY
11040	1	19571422	19571859	438	MseI-[AA]SmaI	6517	19571859	17959	repeat	Alu	SINE	AluSp
11042	1	19574193	19574442	250	MseI-[AA]SmaI	6518	19574442	17965	repeat	Alu	SINE	AluSx
11046	1	19585552	19585683	132	MseI-[AA]SmaI	6520	19585683	17981	repeat	Alu	SINE	AluSc8
11048	1	19590571	19590839	269	MseI-[AA]SmaI	6521	19590839	17990	repeat	Alu	SINE	AluSg7
11068	1	19618331	19618437	107	MseI-[AA]SmaI	6532	19618437	18031	repeat	Alu	SINE	AluSx
11071	1	19623798	19624224	427	SmaI[TT]-MseI	6533	19623797	18038	repeat	Alu	SINE	AluSg
11084	1	19647300	19647550	251	SmaI[TT]-MseI	6541	19647299	18070	repeat	Alu	SINE	AluSx1
11104	1	19677570	19677791	222	SmaI[TT]-MseI	6552	19677569	18110	repeat	Alu	SINE	AluSg
11107	1	19681687	19681913	227	MseI-[AA]SmaI	6554	19681913	18114	repeat	Alu	SINE	AluSz
11112	1	19688824	19689025	202	SmaI[TT]-MseI	6556	19688823	18119	repeat	Alu	SINE	AluSx1
11113	1	19692162	19692252	91	MseI-[AA]SmaI	6557	19692252	18124	repeat	Alu	SINE	AluSp
11115	1	19692774	19693106	333	MseI-[AA]SmaI	6558	19693106	18126	repeat	Alu	SINE	AluSq
11120	1	19698742	19698916	175	MseI-[AA]SmaI	6561	19698916	NA	NULL	Unique	NULL	NULL
11126	1	19719022	19719209	188	MseI-[AA]SmaI	6564	19719209	18155	repeat	Alu	SINE	AluJb
11132	1	19737044	19737237	194	SmaI[TT]-MseI	6567	19737043	NA	NULL	Unique	NULL	NULL
11135	1	19748968	19749155	188	MseI-[AA]SmaI	6569	19749155	18181	repeat	Alu	SINE	AluY
11143	1	19767253	19767478	226	MseI-[AA]SmaI	6573	19767478	18199	repeat	Alu	SINE	AluY
11150	1	19784942	19785069	128	SmaI[TT]-MseI	6576	19784941	18216	repeat	Alu	SINE	AluSq
11152	1	19786864	19787293	430	SmaI[TT]-MseI	6577	19786863	18217	repeat	Alu	SINE	AluY
11154	1	19790879	19791221	343	SmaI[TT]-MseI	6578	19790878	18225	repeat	Alu	SINE	AluY
11158	1	19808081	19808349	269	SmaI[TT]-MseI	6580	19808080	NA	NULL	Unique	NULL	NULL
11167	1	19812779	19812988	210	MseI-[AA]SmaI	6587	19812988	18256	repeat	Alu	SINE	AluSc
11169	1	19813297	19813991	695	MseI-[AA]SmaI	6588	19813991	18258	repeat	Alu	SINE	AluY
11172	1	19815974	19816198	225	SmaI[TT]-MseI	6589	19815973	18261	repeat	Alu	SINE	AluY
11173	1	19817876	19818507	632	MseI-[AA]SmaI	6590	19818507	18266	repeat	Alu	SINE	AluSx1
11178	1	19828681	19828897	217	SmaI[TT]-MseI	6592	19828680	18285	repeat	Alu	SINE	AluSz6
11180	1	19834507	19834735	229	SmaI[TT]-MseI	6593	19834506	18293	repeat	Alu	SINE	AluY
11181	1	19834925	19835159	235	MseI-[AA]SmaI	6594	19835159	18295	repeat	Alu	SINE	AluYb8
11193	1	19879946	19880639	694	SmaI[TT]-MseI	6600	19879945	18365	repeat	Alu	SINE	AluSc
11195	1	19882491	19882715	225	SmaI[TT]-MseI	6601	19882490	18370	repeat	Alu	SINE	AluY
11198	1	19886588	19886862	275	MseI-[AA]SmaI	6603	19886862	18378	repeat	Alu	SINE	AluSp
11203	1	19888819	19889070	252	SmaI[TT]-MseI	6605	19888818	18382	repeat	Alu	SINE	AluSp
11207	1	19895807	19896110	304	SmaI[TT]-MseI	6607	19895806	18398	repeat	Alu	SINE	AluY
11210	1	19899722	19899941	220	SmaI[TT]-MseI	6609	19899721	18404	repeat	Alu	SINE	AluSq2
11212	1	19901168	19901382	215	SmaI[TT]-MseI	6610	19901167	18406	repeat	Alu	SINE	AluSg
11213	1	19903217	19903449	233	MseI-[AA]SmaI	6611	19903449	18411	repeat	Alu	SINE	AluSx3
11224	1	19929343	19929748	406	MseI-[AA]SmaI	6618	19929748	18459	repeat	Alu	SINE	AluSq2
11226	1	19930711	19930927	217	MseI-[AA]SmaI	6619	19930927	18461	repeat	Alu	SINE	AluSx3
11229	1	19937539	19937753	215	SmaI[TT]-MseI	6620	19937538	18470	repeat	Alu	SINE	AluSx1
11231	1	19940663	19940695	33	SmaI[TT]-MseI	6621	19940662	18476	repeat	Alu	SINE	AluSc8
11233	1	19950874	19951095	222	SmaI[TT]-MseI	6622	19950873	18488	repeat	Alu	SINE	AluSx
11234	1	19954881	19955100	220	MseI-[AA]SmaI	6623	19955100	18492	repeat	Alu	SINE	AluSc
11240	1	19963085	19963318	234	MseI-[AA]SmaI	6626	19963318	18504	repeat	Alu	SINE	AluSx1
11242	1	19963834	19964068	235	MseI-[AA]SmaI	6627	19964068	18506	repeat	Alu	SINE	AluY
11244	1	19970179	19970488	310	MseI-[AA]SmaI	6628	19970488	5233967	island	CpGi	NULL	NULL
11257	1	19975946	19976326	381	SmaI[TT]-MseI	6637	19975945	18524	repeat	Alu	SINE	AluSz
11259	1	19976562	19977230	669	SmaI[TT]-MseI	6638	19976561	18526	repeat	Alu	SINE	AluYc
11263	1	19978725	19979405	681	MseI-[AA]SmaI	6641	19979405	18530	repeat	Alu	SINE	AluSz
11270	1	19987784	19988003	220	SmaI[TT]-MseI	6644	19987783	18540	repeat	Alu	SINE	AluY
11278	1	19999912	20000115	204	MseI-[AA]SmaI	6651	20000115	18560	repeat	Alu	SINE	AluSp
11307	1	20093950	20094509	560	MseI-[AA]SmaI	6667	20094509	18718	repeat	Alu	SINE	AluSz
11313	1	20104860	20105070	211	SmaI[TT]-MseI	6670	20104859	18735	repeat	Alu	SINE	AluSx
11314	1	20115274	20115492	219	MseI-[AA]SmaI	6671	20115492	18752	repeat	Alu	SINE	AluY
11321	1	20130978	20131199	222	MseI-[AA]SmaI	6675	20131199	18772	repeat	MIR	SINE	MIRb
11324	1	20136470	20136750	281	SmaI[TT]-MseI	6676	20136469	18781	repeat	Alu	SINE	AluSx
11339	1	20170642	20170891	250	MseI-[AA]SmaI	6685	20170891	18824	repeat	Alu	SINE	AluSg7
11341	1	20175277	20175497	221	MseI-[AA]SmaI	6686	20175497	18829	repeat	Alu	SINE	AluSp
11345	1	20180233	20180678	446	MseI-[AA]SmaI	6688	20180678	18835	repeat	Alu	SINE	AluSg
11348	1	20180997	20181051	55	SmaI[TT]-MseI	6689	20180996	3262943	repeat	ERV	LTR	MLT1J
11352	1	20182037	20182249	213	SmaI[TT]-MseI	6691	20182036	18837	repeat	Alu	SINE	AluSx3
11353	1	20189983	20190267	285	MseI-[AA]SmaI	6692	20190267	18849	repeat	Alu	SINE	AluSp
11356	1	20190778	20191001	224	SmaI[TT]-MseI	6693	20190777	18850	repeat	Alu	SINE	AluSg
11362	1	20206726	20207031	306	SmaI[TT]-MseI	6696	20206725	18875	repeat	Alu	SINE	AluSq2
11364	1	20208051	20208271	221	SmaI[TT]-MseI	6697	20208050	18877	repeat	Alu	SINE	AluY
11368	1	20224535	20224863	329	SmaI[TT]-MseI	6699	20224534	18886	repeat	Alu	SINE	AluSp
11372	1	20227496	20227648	153	SmaI[TT]-MseI	6701	20227495	18890	repeat	Alu	SINE	AluSq
11374	1	20228792	20229004	213	SmaI[TT]-MseI	6702	20228791	18891	repeat	Alu	SINE	AluY
11376	1	20237976	20238197	222	SmaI[TT]-MseI	6703	20237975	18894	repeat	Alu	SINE	AluSg
11379	1	20243869	20244111	243	MseI-[AA]SmaI	6705	20244111	18900	repeat	Alu	SINE	AluY
11381	1	20246067	20246172	106	MseI-[AA]SmaI	6706	20246172	18902	repeat	Alu	SINE	AluY
11384	1	20247068	20247758	691	SmaI[TT]-MseI	6707	20247067	NA	NULL	Unique	NULL	NULL
11397	1	20261317	20262000	684	SmaI[TT]-MseI	6714	20261316	18909	repeat	Alu	SINE	AluSz
11399	1	20274753	20274985	233	SmaI[TT]-MseI	6715	20274752	18918	repeat	Alu	SINE	AluY
11400	1	20287539	20287760	222	MseI-[AA]SmaI	6716	20287760	18925	repeat	Alu	SINE	AluY
11405	1	20312554	20312852	299	SmaI[TT]-MseI	6718	20312553	18940	repeat	Alu	SINE	AluY
11406	1	20348443	20348623	181	MseI-[AA]SmaI	6719	20348623	18949	repeat	Alu	SINE	AluYk4
11409	1	20355998	20356164	167	SmaI[TT]-MseI	6720	20355997	3263091	repeat	ERV	LTR	LTR1
11429	1	20451422	20451609	188	SmaI[TT]-MseI	6730	20451421	NA	NULL	Unique	NULL	NULL
11435	1	20462073	20462339	267	SmaI[TT]-MseI	6733	20462072	19056	repeat	Alu	SINE	AluSx
11447	1	20498348	20498899	552	SmaI[TT]-MseI	6740	20498347	19088	repeat	Alu	SINE	AluY
11449	1	20502496	20502582	87	SmaI[TT]-MseI	6741	20502495	19093	repeat	Alu	SINE	AluSq2
11465	1	20564842	20565126	285	MseI-[AA]SmaI	6752	20565126	19150	repeat	Alu	SINE	AluY
11486	1	20643397	20643573	177	MseI-[AA]SmaI	6763	20643573	19226	repeat	Alu	SINE	AluY
11495	1	20653052	20653254	203	SmaI[TT]-MseI	6768	20653051	19237	repeat	Alu	SINE	AluSg
11509	1	20685518	20686211	694	SmaI[TT]-MseI	6775	20685517	NA	NULL	Unique	NULL	NULL
11514	1	20694306	20694557	252	MseI-[AA]SmaI	6778	20694557	19282	repeat	Alu	SINE	AluSx
11519	1	20708121	20708411	291	SmaI[TT]-MseI	6780	20708120	19296	repeat	Alu	SINE	AluSx
11534	1	20759822	20760048	227	MseI-[AA]SmaI	6788	20760048	19353	repeat	Alu	SINE	AluSp
11537	1	20760897	20761117	221	SmaI[TT]-MseI	6789	20760896	19355	repeat	Alu	SINE	AluY
11538	1	20764937	20765244	308	MseI-[AA]SmaI	6790	20765244	3263372	repeat	ERV	LTR	MLT1F2
11543	1	20783410	20784265	856	SmaI[TT]-MseI	6792	20783409	19383	repeat	Alu	SINE	AluSq2
11545	1	20797914	20798134	221	SmaI[TT]-MseI	6793	20797913	19397	repeat	Alu	SINE	AluSq2
11566	1	20829120	20829346	227	SmaI[TT]-MseI	6805	20829119	19436	repeat	Alu	SINE	AluSz
11569	1	20833407	20833633	227	MseI-[AA]SmaI	6807	20833633	19446	repeat	Alu	SINE	AluSx
11574	1	20839437	20839565	129	MseI-[AA]SmaI	6810	20839565	19454	repeat	Alu	SINE	AluSz
11576	1	20839990	20840309	320	MseI-[AA]SmaI	6811	20840309	19456	repeat	Alu	SINE	AluSc
11578	1	20844270	20844622	353	MseI-[AA]SmaI	6812	20844622	19463	repeat	Alu	SINE	AluSz
11581	1	20851146	20851798	653	SmaI[TT]-MseI	6813	20851145	19473	repeat	Alu	SINE	AluY
11583	1	20855475	20855696	222	SmaI[TT]-MseI	6814	20855474	19477	repeat	Alu	SINE	AluSp
11588	1	20874416	20874691	276	MseI-[AA]SmaI	6817	20874691	19500	repeat	Alu	SINE	AluSz
11591	1	20876773	20876993	221	SmaI[TT]-MseI	6818	20876772	19504	repeat	Alu	SINE	AluSp
11603	1	20891010	20891262	253	SmaI[TT]-MseI	6826	20891009	19523	repeat	Alu	SINE	AluSq2
11605	1	20893740	20894381	642	SmaI[TT]-MseI	6827	20893739	19529	repeat	Alu	SINE	AluSz6
11622	1	20932665	20932752	88	MseI-[AA]SmaI	6836	20932752	19586	repeat	Alu	SINE	AluYa5
11625	1	20937967	20938756	790	SmaI[TT]-MseI	6837	20937966	19596	repeat	Alu	SINE	AluSc
11626	1	20939031	20939360	330	MseI-[AA]SmaI	6838	20939360	19599	repeat	Alu	SINE	AluSg
11635	1	20947161	20947522	362	SmaI[TT]-MseI	6842	20947160	19615	repeat	Alu	SINE	AluSg4
11642	1	20962048	20962266	219	MseI-[AA]SmaI	6847	20962266	19639	repeat	Alu	SINE	AluY
11646	1	20972719	20973061	343	MseI-[AA]SmaI	6849	20973061	19649	repeat	Alu	SINE	AluSc
11660	1	20998932	20999641	710	MseI-[AA]SmaI	6858	20999641	19676	repeat	Alu	SINE	AluSx
11667	1	21013142	21013369	228	SmaI[TT]-MseI	6862	21013141	19700	repeat	Alu	SINE	AluSx
11680	1	21027549	21027634	86	SmaI[TT]-MseI	6871	21027548	3263568	repeat	ERV	LTR	MER74B
11681	1	21027635	21027848	214	MseI-[AA]SmaI	6872	21027848	19723	repeat	Alu	SINE	AluSc8
11683	1	21030295	21030348	54	MseI-[AA]SmaI	6873	21030348	19725	repeat	Alu	SINE	AluYc
11688	1	21035117	21035251	135	SmaI[TT]-MseI	6876	21035116	19734	repeat	MIR	SINE	MIRb
11692	1	21040346	21040907	562	MseI-[AA]SmaI	6879	21040907	19745	repeat	Alu	SINE	AluSx
11694	1	21042764	21043746	983	MseI-[AA]SmaI	6880	21043746	19750	repeat	Alu	SINE	AluSx1
11714	1	21061295	21061519	225	MseI-[AA]SmaI	6894	21061519	19767	repeat	Alu	SINE	AluY
11720	1	21066322	21066540	219	MseI-[AA]SmaI	6897	21066540	19774	repeat	Alu	SINE	AluSx
11722	1	21078379	21078679	301	MseI-[AA]SmaI	6898	21078679	19789	repeat	Alu	SINE	AluSx
11724	1	21084491	21084563	73	MseI-[AA]SmaI	6899	21084563	19796	repeat	Alu	SINE	AluSx3
11728	1	21091132	21091292	161	MseI-[AA]SmaI	6901	21091292	19808	repeat	Alu	SINE	AluSq2
11732	1	21092260	21092382	123	MseI-[AA]SmaI	6904	21092382	19810	repeat	Alu	SINE	AluSz6
11738	1	21110033	21110187	155	MseI-[AA]SmaI	6907	21110187	19834	repeat	Alu	SINE	AluSx3
11740	1	21112643	21113183	541	MseI-[AA]SmaI	6908	21113183	5234021	island	CpGi	NULL	NULL
11745	1	21118077	21118387	311	SmaI[TT]-MseI	6911	21118076	19846	repeat	Alu	SINE	AluSx1
11747	1	21121885	21122105	221	SmaI[TT]-MseI	6912	21121884	19853	repeat	Alu	SINE	AluSc
11753	1	21145994	21146233	240	SmaI[TT]-MseI	6915	21145993	19886	repeat	Alu	SINE	AluJb
11759	1	21166081	21166293	213	SmaI[TT]-MseI	6918	21166080	19905	repeat	Alu	SINE	AluSz6
11760	1	21169657	21169934	278	MseI-[AA]SmaI	6919	21169934	19908	repeat	Alu	SINE	AluSz
11762	1	21171013	21171249	237	MseI-[AA]SmaI	6920	21171249	19909	repeat	Alu	SINE	AluSq
11767	1	21190031	21190248	218	SmaI[TT]-MseI	6922	21190030	19929	repeat	Alu	SINE	AluSp
11768	1	21195970	21196192	223	MseI-[AA]SmaI	6923	21196192	19934	repeat	Alu	SINE	AluY
11773	1	21216559	21216785	227	SmaI[TT]-MseI	6925	21216558	19958	repeat	Alu	SINE	AluSz6
11777	1	21240393	21240712	320	SmaI[TT]-MseI	6927	21240392	19977	repeat	Alu	SINE	AluY
11782	1	21246493	21246737	245	SmaI[TT]-MseI	6930	21246492	19983	repeat	Alu	SINE	AluSp
11784	1	21248884	21249106	223	SmaI[TT]-MseI	6931	21248883	19984	repeat	Alu	SINE	AluSp
11785	1	21258084	21258342	259	MseI-[AA]SmaI	6932	21258342	19996	repeat	Alu	SINE	AluSc
11790	1	21293058	21293332	275	SmaI[TT]-MseI	6934	21293057	20023	repeat	Alu	SINE	AluSx1
11792	1	21306337	21306543	207	SmaI[TT]-MseI	6935	21306336	20034	repeat	Alu	SINE	AluY
11793	1	21312839	21313166	328	MseI-[AA]SmaI	6936	21313166	20040	repeat	Alu	SINE	AluY
11795	1	21316878	21317086	209	MseI-[AA]SmaI	6937	21317086	20044	repeat	Alu	SINE	AluSg
11800	1	21336241	21336459	219	SmaI[TT]-MseI	6939	21336240	20061	repeat	Alu	SINE	AluSx4
11802	1	21353779	21354309	531	SmaI[TT]-MseI	6940	21353778	20077	repeat	Alu	SINE	AluSc8
11808	1	21389176	21389398	223	SmaI[TT]-MseI	6943	21389175	20102	repeat	Alu	SINE	AluSx
11810	1	21390296	21390566	271	SmaI[TT]-MseI	6944	21390295	20104	repeat	Alu	SINE	AluSz
11811	1	21401720	21401986	267	MseI-[AA]SmaI	6945	21401986	20120	repeat	Alu	SINE	AluSx1
11816	1	21408228	21408451	224	SmaI[TT]-MseI	6947	21408227	20132	repeat	Alu	SINE	AluSz6
11817	1	21435102	21435320	219	MseI-[AA]SmaI	6948	21435320	20168	repeat	Alu	SINE	AluSx
11820	1	21440733	21441102	370	SmaI[TT]-MseI	6949	21440732	20177	repeat	Alu	SINE	AluSc
11832	1	21473324	21473679	356	MseI-[AA]SmaI	6956	21473679	20233	repeat	Alu	SINE	AluSx3
11834	1	21473927	21474323	397	SmaI[TT]-MseI	6957	21473926	20234	repeat	Alu	SINE	AluSg
11839	1	21487041	21487588	548	MseI-[AA]SmaI	6960	21487588	20256	repeat	Alu	SINE	AluSz
11842	1	21493738	21494175	438	MseI-[AA]SmaI	6962	21494175	20268	repeat	Alu	SINE	AluSx1
11848	1	21495653	21495865	213	MseI-[AA]SmaI	6965	21495865	20272	repeat	Alu	SINE	AluSx
11854	1	21512255	21512339	85	SmaI[TT]-MseI	6968	21512254	20303	repeat	Alu	SINE	AluSx
11860	1	21527670	21528080	411	SmaI[TT]-MseI	6971	21527669	20338	repeat	Alu	SINE	AluSp
11861	1	21531793	21531880	88	MseI-[AA]SmaI	6972	21531880	20348	repeat	Alu	SINE	AluSq2
11864	1	21540560	21540867	308	SmaI[TT]-MseI	6973	21540559	20366	repeat	Alu	SINE	AluY
11871	1	21547045	21547213	169	MseI-[AA]SmaI	6977	21547213	20374	repeat	Alu	SINE	AluSz
11883	1	21557928	21558277	350	SmaI[TT]-MseI	6984	21557927	20396	repeat	Alu	SINE	AluSx1
11885	1	21559258	21559334	77	SmaI[TT]-MseI	6985	21559257	20399	repeat	Alu	SINE	AluSz6
11888	1	21562994	21563066	73	MseI-[AA]SmaI	6987	21563066	20404	repeat	Alu	SINE	AluSp
11891	1	21576360	21576450	91	SmaI[TT]-MseI	6988	21576359	20432	repeat	Alu	SINE	AluSx3
11892	1	21577206	21577424	219	MseI-[AA]SmaI	6989	21577424	20435	repeat	Alu	SINE	AluY
11895	1	21587166	21587975	810	SmaI[TT]-MseI	6990	21587165	NA	NULL	Unique	NULL	NULL
11898	1	21600226	21600272	47	MseI-[AA]SmaI	6992	21600272	20466	repeat	Alu	SINE	AluYc
11900	1	21601764	21602012	249	MseI-[AA]SmaI	6993	21602012	20469	repeat	Alu	SINE	AluSq2
11906	1	21607439	21607607	169	MseI-[AA]SmaI	6996	21607607	20475	repeat	Alu	SINE	AluSx1
11909	1	21608283	21608482	200	SmaI[TT]-MseI	6997	21608282	20476	repeat	Alu	SINE	AluSg
11911	1	21609528	21609765	238	SmaI[TT]-MseI	6998	21609527	20479	repeat	Alu	SINE	AluSc8
11912	1	21614906	21614950	45	MseI-[AA]SmaI	6999	21614950	20488	repeat	MIR	SINE	MIRb
11931	1	21630513	21630733	221	MseI-[AA]SmaI	7011	21630733	20521	repeat	Alu	SINE	AluY
11936	1	21636378	21636967	590	SmaI[TT]-MseI	7013	21636377	20529	repeat	Alu	SINE	AluY
11949	1	21650404	21650625	222	SmaI[TT]-MseI	7020	21650403	20558	repeat	Alu	SINE	AluSz6
11955	1	21656822	21657202	381	SmaI[TT]-MseI	7023	21656821	20567	repeat	Alu	SINE	AluSz6
11972	1	21680907	21681141	235	SmaI[TT]-MseI	7033	21680906	20606	repeat	Alu	SINE	AluSz
11978	1	21692427	21692780	354	SmaI[TT]-MseI	7036	21692426	20628	repeat	Alu	SINE	AluY
11981	1	21695881	21696104	224	MseI-[AA]SmaI	7038	21696104	20636	repeat	Alu	SINE	AluSz
11983	1	21696847	21697073	227	MseI-[AA]SmaI	7039	21697073	20639	repeat	Alu	SINE	AluSx1
11987	1	21700314	21700583	270	MseI-[AA]SmaI	7041	21700583	20645	repeat	Alu	SINE	AluY
11990	1	21709592	21709844	253	SmaI[TT]-MseI	7042	21709591	20659	repeat	Alu	SINE	AluSg
11995	1	21722380	21722643	264	MseI-[AA]SmaI	7045	21722643	20672	repeat	Alu	SINE	AluSx
11999	1	21727939	21728246	308	MseI-[AA]SmaI	7047	21728246	20675	repeat	Alu	SINE	AluSg
12001	1	21730273	21730676	404	MseI-[AA]SmaI	7048	21730676	20678	repeat	Alu	SINE	AluY
12004	1	21735899	21736124	226	SmaI[TT]-MseI	7049	21735898	20688	repeat	Alu	SINE	AluY
12012	1	21758825	21759044	220	MseI-[AA]SmaI	7054	21759044	20694	repeat	Alu	SINE	AluSx
12018	1	21764241	21764415	175	SmaI[TT]-MseI	7057	21764240	20702	repeat	Alu	SINE	AluYc
12021	1	21814529	21814751	223	MseI-[AA]SmaI	7059	21814751	20734	repeat	Alu	SINE	AluY
12025	1	21830439	21830467	29	MseI-[AA]SmaI	7061	21830467	NA	NULL	Unique	NULL	NULL
12028	1	21830768	21830872	105	SmaI[TT]-MseI	7063	21830767	NA	NULL	Unique	NULL	NULL
12038	1	21847771	21847964	194	SmaI[TT]-MseI	7069	21847770	20785	repeat	Alu	SINE	AluSx1
12039	1	21849408	21849716	309	MseI-[AA]SmaI	7070	21849716	20789	repeat	Alu	SINE	AluSx1
12045	1	21853619	21853935	317	SmaI[TT]-MseI	7073	21853618	20797	repeat	Alu	SINE	AluSp
12049	1	21871877	21872280	404	SmaI[TT]-MseI	7075	21871876	20837	repeat	Alu	SINE	AluSx1
12057	1	21878312	21878530	219	SmaI[TT]-MseI	7079	21878311	20845	repeat	Alu	SINE	AluYf4
12058	1	21878679	21878896	218	MseI-[AA]SmaI	7080	21878896	20846	repeat	Alu	SINE	AluSp
12061	1	21882357	21882812	456	SmaI[TT]-MseI	7081	21882356	20850	repeat	Alu	SINE	AluY
12063	1	21886106	21886322	217	SmaI[TT]-MseI	7082	21886105	20857	repeat	Alu	SINE	AluSx
12069	1	21892870	21892954	85	SmaI[TT]-MseI	7085	21892869	20866	repeat	Alu	SINE	AluSx
12072	1	21897189	21898089	901	MseI-[AA]SmaI	7087	21898089	20873	repeat	Alu	SINE	AluY
12074	1	21899765	21899854	90	MseI-[AA]SmaI	7088	21899854	20878	repeat	Alu	SINE	AluSx
12085	1	21907786	21908018	233	SmaI[TT]-MseI	7094	21907785	20890	repeat	Alu	SINE	AluYk4
12096	1	21918163	21918686	524	SmaI[TT]-MseI	7100	21918162	NA	NULL	Unique	NULL	NULL
12107	1	21927045	21927302	258	MseI-[AA]SmaI	7106	21927302	20909	repeat	Alu	SINE	AluY
12166	1	21997066	21997636	571	MseI-[AA]SmaI	7145	21997636	5234068	shore	Unique	NULL	NULL
12168	1	22023804	22024080	277	MseI-[AA]SmaI	7146	22024080	21040	repeat	Alu	SINE	AluY
12170	1	22035083	22035302	220	MseI-[AA]SmaI	7147	22035302	21051	repeat	Alu	SINE	AluSx3
12172	1	22043221	22043445	225	MseI-[AA]SmaI	7148	22043445	21062	repeat	Alu	SINE	AluY
12174	1	22051940	22052170	231	MseI-[AA]SmaI	7149	22052170	21076	repeat	Alu	SINE	AluSp
12176	1	22065718	22065936	219	MseI-[AA]SmaI	7150	22065936	21096	repeat	Alu	SINE	AluSx1
12178	1	22075107	22075328	222	MseI-[AA]SmaI	7151	22075328	21105	repeat	Alu	SINE	AluSz6
12180	1	22090008	22090856	849	MseI-[AA]SmaI	7152	22090856	21126	repeat	Alu	SINE	AluSz6
12183	1	22091671	22092034	364	MseI-[AA]SmaI	7154	22092034	21128	repeat	Alu	SINE	AluSx4
12185	1	22092217	22092788	572	MseI-[AA]SmaI	7155	22092788	21130	repeat	Alu	SINE	AluSz6
12187	1	22097646	22097791	146	MseI-[AA]SmaI	7156	22097791	21143	repeat	Alu	SINE	AluSx
12189	1	22098601	22099040	440	MseI-[AA]SmaI	7157	22099040	21145	repeat	Alu	SINE	AluY
12191	1	22100887	22101104	218	MseI-[AA]SmaI	7158	22101104	21150	repeat	Alu	SINE	AluSc
12195	1	22105368	22105586	219	SmaI[TT]-MseI	7160	22105367	21162	repeat	Alu	SINE	AluY
12197	1	22107329	22107547	219	SmaI[TT]-MseI	7161	22107328	21165	repeat	Alu	SINE	AluSg
12201	1	22110475	22110793	319	MseI-[AA]SmaI	7164	22110793	21168	repeat	Alu	SINE	AluSp
12204	1	22114902	22115534	633	SmaI[TT]-MseI	7165	22114901	21175	repeat	Alu	SINE	AluSp
12210	1	22131634	22131677	44	SmaI[TT]-MseI	7168	22131633	21218	repeat	Alu	SINE	AluSg7
12212	1	22134961	22135326	366	SmaI[TT]-MseI	7169	22134960	21226	repeat	Alu	SINE	AluSx1
12213	1	22136054	22136371	318	MseI-[AA]SmaI	7170	22136371	21231	repeat	Alu	SINE	AluSx
12217	1	22137128	22137324	197	SmaI[TT]-MseI	7172	22137127	21234	repeat	Alu	SINE	AluSx
12222	1	22145544	22145790	247	MseI-[AA]SmaI	7175	22145790	21250	repeat	Alu	SINE	AluSp
12232	1	22163867	22164095	229	SmaI[TT]-MseI	7180	22163866	21274	repeat	Alu	SINE	AluSx
12253	1	22194317	22194845	529	SmaI[TT]-MseI	7193	22194316	21311	repeat	Alu	SINE	AluSq
12258	1	22196967	22197037	71	MseI-[AA]SmaI	7196	22197037	NA	NULL	Unique	NULL	NULL
12289	1	22235200	22235525	326	MseI-[AA]SmaI	7215	22235525	21361	repeat	Alu	SINE	AluSz
12293	1	22239256	22239397	142	MseI-[AA]SmaI	7217	22239397	21368	repeat	Alu	SINE	AluSz
12299	1	22246493	22247075	583	SmaI[TT]-MseI	7220	22246492	21385	repeat	Alu	SINE	AluSz
12307	1	22252416	22252760	345	SmaI[TT]-MseI	7224	22252415	21394	repeat	Alu	SINE	AluSz
12309	1	22255336	22255566	231	SmaI[TT]-MseI	7225	22255335	21399	repeat	Alu	SINE	AluSp
12329	1	22269423	22269697	275	SmaI[TT]-MseI	7239	22269422	21414	repeat	Alu	SINE	AluY
12330	1	22272155	22272882	728	MseI-[AA]SmaI	7240	22272882	21420	repeat	Alu	SINE	AluSq2
12339	1	22287057	22287279	223	MseI-[AA]SmaI	7245	22287279	21444	repeat	Alu	SINE	AluSx
12343	1	22291746	22292303	558	SmaI[TT]-MseI	7247	22291745	21452	repeat	Alu	SINE	AluSc
12354	1	22305659	22305879	221	SmaI[TT]-MseI	7253	22305658	21481	repeat	Alu	SINE	AluSq2
12355	1	22306506	22306896	391	MseI-[AA]SmaI	7254	22306896	21483	repeat	Alu	SINE	AluSq2
12360	1	22308312	22308531	220	SmaI[TT]-MseI	7257	22308311	21486	repeat	Alu	SINE	AluY
12366	1	22317922	22318640	719	SmaI[TT]-MseI	7260	22317921	21508	repeat	Alu	SINE	AluSz
12369	1	22323773	22324106	334	MseI-[AA]SmaI	7262	22324106	21518	repeat	Alu	SINE	AluSq10
12380	1	22330292	22330511	220	SmaI[TT]-MseI	7267	22330291	21531	repeat	Alu	SINE	AluSq2
12381	1	22330521	22331516	996	MseI-[AA]SmaI	7268	22331516	21533	repeat	Alu	SINE	AluSq2
12384	1	22334193	22334338	146	SmaI[TT]-MseI	7269	22334192	21538	repeat	MIR	SINE	MIR3
12386	1	22341110	22341825	716	SmaI[TT]-MseI	7270	22341109	21558	repeat	Alu	SINE	AluSz
12388	1	22344608	22344875	268	SmaI[TT]-MseI	7271	22344607	21565	repeat	Alu	SINE	AluSx
12390	1	22349251	22349469	219	SmaI[TT]-MseI	7272	22349250	21576	repeat	Alu	SINE	AluY
12394	1	22351193	22351413	221	SmaI[TT]-MseI	7274	22351192	21580	repeat	Alu	SINE	AluSx1
12397	1	22362644	22362868	225	MseI-[AA]SmaI	7276	22362868	21600	repeat	Alu	SINE	AluY
12399	1	22367338	22367402	65	MseI-[AA]SmaI	7277	22367402	21608	repeat	Alu	SINE	AluSx
12402	1	22370858	22371068	211	SmaI[TT]-MseI	7278	22370857	21615	repeat	Alu	SINE	AluSz
12403	1	22377116	22377337	222	MseI-[AA]SmaI	7279	22377337	21625	repeat	Alu	SINE	AluSg4
12406	1	22377628	22377848	221	SmaI[TT]-MseI	7280	22377627	21626	repeat	Alu	SINE	AluY
12417	1	22385069	22385306	238	SmaI[TT]-MseI	7287	22385068	21637	repeat	Alu	SINE	AluSp
12418	1	22387335	22387825	491	MseI-[AA]SmaI	7288	22387825	21642	repeat	Alu	SINE	AluSq
12421	1	22388130	22388368	239	SmaI[TT]-MseI	7289	22388129	21643	repeat	Alu	SINE	AluSx1
12423	1	22390307	22390584	278	SmaI[TT]-MseI	7290	22390306	21646	repeat	Alu	SINE	AluSz6
12425	1	22392345	22392593	249	SmaI[TT]-MseI	7291	22392344	21651	repeat	Alu	SINE	AluSz
12428	1	22402790	22402875	86	MseI-[AA]SmaI	7293	22402875	21667	repeat	Alu	SINE	AluSz
12431	1	22405725	22405945	221	SmaI[TT]-MseI	7294	22405724	21670	repeat	Alu	SINE	AluSx1
12433	1	22420884	22421107	224	SmaI[TT]-MseI	7295	22420883	21677	repeat	Alu	SINE	AluY
12435	1	22421856	22422075	220	SmaI[TT]-MseI	7296	22421855	21678	repeat	Alu	SINE	AluY
12439	1	22434186	22434517	332	SmaI[TT]-MseI	7298	22434185	21694	repeat	Alu	SINE	AluSg
12464	1	22472506	22472721	216	SmaI[TT]-MseI	7315	22472505	21737	repeat	Alu	SINE	AluSc
12465	1	22481773	22481957	185	MseI-[AA]SmaI	7316	22481957	21754	repeat	Alu	SINE	AluSg
12482	1	22513124	22513911	788	SmaI[TT]-MseI	7324	22513123	21798	repeat	Alu	SINE	AluSz
12484	1	22518872	22519268	397	SmaI[TT]-MseI	7325	22518871	21806	repeat	Alu	SINE	AluSz6
12486	1	22520092	22520436	345	SmaI[TT]-MseI	7326	22520091	21808	repeat	Alu	SINE	AluSx1
12496	1	22538328	22538913	586	SmaI[TT]-MseI	7332	22538327	21830	repeat	Alu	SINE	AluSx
12515	1	22583838	22584015	178	SmaI[TT]-MseI	7343	22583837	21891	repeat	MIR	SINE	MIRb
12525	1	22603995	22604435	441	MseI-[AA]SmaI	7349	22604435	21915	repeat	MIR	SINE	MIRb
12538	1	22632243	22632524	282	SmaI[TT]-MseI	7355	22632242	21943	repeat	Alu	SINE	AluY
12541	1	22638910	22639382	473	SmaI[TT]-MseI	7357	22638909	21949	repeat	Alu	SINE	AluSz
12543	1	22640582	22640816	235	SmaI[TT]-MseI	7358	22640581	21952	repeat	Alu	SINE	AluSx1
12546	1	22650997	22651393	397	SmaI[TT]-MseI	7360	22650996	21969	repeat	Alu	SINE	AluSx1
12549	1	22657681	22657902	222	MseI-[AA]SmaI	7362	22657902	21976	repeat	Alu	SINE	AluSz6
12565	1	22681459	22681686	228	SmaI[TT]-MseI	7371	22681458	21996	repeat	Alu	SINE	AluSz
12567	1	22684535	22684800	266	SmaI[TT]-MseI	7372	22684534	NA	NULL	Unique	NULL	NULL
12581	1	22716383	22717163	781	SmaI[TT]-MseI	7379	22716382	22034	repeat	Alu	SINE	AluY
12589	1	22731966	22732235	270	SmaI[TT]-MseI	7383	22731965	22057	repeat	Alu	SINE	AluSx1
12595	1	22762664	22762929	266	MseI-[AA]SmaI	7387	22762929	22108	repeat	Alu	SINE	AluSc8
12602	1	22780536	22780988	453	SmaI[TT]-MseI	7390	22780535	22124	repeat	Alu	SINE	AluSz
12605	1	22803886	22804066	181	MseI-[AA]SmaI	7392	22804066	22149	repeat	Alu	SINE	AluSc
12607	1	22809280	22809496	217	MseI-[AA]SmaI	7393	22809496	22156	repeat	Alu	SINE	AluY
12611	1	22846842	22847163	322	SmaI[TT]-MseI	7395	22846841	NA	NULL	Unique	NULL	NULL
12615	1	22858737	22858958	222	SmaI[TT]-MseI	7397	22858736	NA	NULL	Unique	NULL	NULL
12616	1	22868468	22868690	223	MseI-[AA]SmaI	7398	22868690	22197	repeat	Alu	SINE	AluSz
12639	1	22900565	22900834	270	SmaI[TT]-MseI	7411	22900564	22236	repeat	Alu	SINE	AluY
12674	1	22966290	22966603	314	SmaI[TT]-MseI	7429	22966289	22311	repeat	Alu	SINE	AluSq2
12704	1	23012973	23013049	77	SmaI[TT]-MseI	7447	23012972	22380	repeat	Alu	SINE	AluSx
12705	1	23015402	23015609	208	MseI-[AA]SmaI	7448	23015609	22386	repeat	Alu	SINE	AluY
12710	1	23023800	23024243	444	SmaI[TT]-MseI	7450	23023799	22403	repeat	Alu	SINE	AluSz
12728	1	23042918	23043487	570	SmaI[TT]-MseI	7465	23042917	22428	repeat	Alu	SINE	AluSz
12730	1	23044972	23045599	628	SmaI[TT]-MseI	7466	23044971	22431	repeat	Alu	SINE	AluSq
12732	1	23046451	23046668	218	SmaI[TT]-MseI	7467	23046450	3264745	repeat	ERV	LTR	MLT1H1
12736	1	23059999	23060296	298	MseI-[AA]SmaI	7470	23060296	NA	NULL	Unique	NULL	NULL
12755	1	23109283	23110141	859	MseI-[AA]SmaI	7480	23110141	5234136	shore	Unique	NULL	NULL
12774	1	23164968	23165348	381	MseI-[AA]SmaI	7490	23165348	22616	repeat	Alu	SINE	AluY
12776	1	23172603	23172833	231	MseI-[AA]SmaI	7491	23172833	22628	repeat	Alu	SINE	AluSz
12783	1	23185991	23186210	220	MseI-[AA]SmaI	7495	23186210	22646	repeat	Alu	SINE	AluSz
12789	1	23190632	23190842	211	SmaI[TT]-MseI	7498	23190631	22653	repeat	Alu	SINE	AluSx1
12790	1	23193264	23193351	88	MseI-[AA]SmaI	7499	23193351	22655	repeat	Alu	SINE	AluSq2
12799	1	23214628	23214881	254	SmaI[TT]-MseI	7503	23214627	22688	repeat	Alu	SINE	AluSq
12800	1	23220682	23221014	333	MseI-[AA]SmaI	7504	23221014	22696	repeat	Alu	SINE	AluSq2
12804	1	23225405	23225610	206	MseI-[AA]SmaI	7506	23225610	22702	repeat	Alu	SINE	AluSp
12815	1	23254467	23254553	87	MseI-[AA]SmaI	7512	23254553	22736	repeat	Alu	SINE	AluSz6
12831	1	23287950	23288165	216	SmaI[TT]-MseI	7521	23287949	22781	repeat	Alu	SINE	AluSx
12833	1	23290523	23290842	320	SmaI[TT]-MseI	7522	23290522	22785	repeat	Alu	SINE	AluSx1
12836	1	23305377	23305603	227	MseI-[AA]SmaI	7524	23305603	22812	repeat	Alu	SINE	AluY
12838	1	23310955	23311054	100	MseI-[AA]SmaI	7525	23311054	22820	repeat	Alu	SINE	AluSq2
12843	1	23313436	23314261	826	SmaI[TT]-MseI	7527	23313435	22823	repeat	Alu	SINE	AluSx
12845	1	23321054	23321283	230	SmaI[TT]-MseI	7528	23321053	22832	repeat	Alu	SINE	AluSx3
12852	1	23337979	23338096	118	SmaI[TT]-MseI	7532	23337978	22848	repeat	Alu	SINE	AluSq2
12855	1	23347857	23348082	226	MseI-[AA]SmaI	7534	23348082	22864	repeat	Alu	SINE	AluSq
12858	1	23351917	23352133	217	SmaI[TT]-MseI	7535	23351916	22869	repeat	Alu	SINE	AluSq10
12861	1	23359699	23359939	241	MseI-[AA]SmaI	7537	23359939	22876	repeat	Alu	SINE	AluSx
12864	1	23361789	23362010	222	SmaI[TT]-MseI	7538	23361788	22877	repeat	Alu	SINE	AluSp
12866	1	23369039	23369600	562	SmaI[TT]-MseI	7539	23369038	22883	repeat	Alu	SINE	AluYa5
12877	1	23441121	23441285	165	MseI-[AA]SmaI	7545	23441285	22942	repeat	MIR	SINE	MIR3
12880	1	23442127	23442708	582	SmaI[TT]-MseI	7546	23442126	22943	repeat	Alu	SINE	AluSz
12881	1	23444288	23444507	220	MseI-[AA]SmaI	7547	23444507	22948	repeat	Alu	SINE	AluSg
12887	1	23454110	23454327	218	SmaI[TT]-MseI	7550	23454109	22962	repeat	Alu	SINE	AluY
12888	1	23457410	23457636	227	MseI-[AA]SmaI	7551	23457636	22967	repeat	Alu	SINE	AluSx1
12891	1	23463000	23463335	336	MseI-[AA]SmaI	7553	23463335	22976	repeat	Alu	SINE	AluY
12893	1	23465102	23465415	314	MseI-[AA]SmaI	7554	23465415	22980	repeat	Alu	SINE	AluSx
12896	1	23468431	23468655	225	SmaI[TT]-MseI	7555	23468430	22983	repeat	Alu	SINE	AluSp
12900	1	23476164	23476379	216	MseI-[AA]SmaI	7558	23476379	23001	repeat	Alu	SINE	AluSc
12904	1	23485203	23485384	182	MseI-[AA]SmaI	7560	23485384	23017	repeat	Alu	SINE	AluSx1
12909	1	23489440	23489657	218	MseI-[AA]SmaI	7563	23489657	23025	repeat	Alu	SINE	AluSg
12911	1	23490611	23490909	299	MseI-[AA]SmaI	7564	23490909	23028	repeat	Alu	SINE	AluY
12924	1	23505367	23505572	206	SmaI[TT]-MseI	7571	23505366	23055	repeat	Alu	SINE	AluSq2
12925	1	23512706	23512925	220	MseI-[AA]SmaI	7572	23512925	23076	repeat	Alu	SINE	AluSq2
12927	1	23519170	23519254	85	MseI-[AA]SmaI	7573	23519254	23092	repeat	Alu	SINE	AluSc
12930	1	23532130	23532865	736	SmaI[TT]-MseI	7574	23532129	23120	repeat	Alu	SINE	AluSq2
12932	1	23539413	23539703	291	SmaI[TT]-MseI	7575	23539412	23134	repeat	Alu	SINE	AluSz
12942	1	23545113	23545198	86	SmaI[TT]-MseI	7583	23545112	23142	repeat	Alu	SINE	AluSc8
12951	1	23566863	23567128	266	MseI-[AA]SmaI	7588	23567128	23194	repeat	Alu	SINE	AluY
12955	1	23575154	23575219	66	MseI-[AA]SmaI	7591	23575219	23211	repeat	Alu	SINE	AluYc
12959	1	23577033	23577444	412	MseI-[AA]SmaI	7593	23577444	23216	repeat	Alu	SINE	AluSq2
12968	1	23592600	23593031	432	SmaI[TT]-MseI	7597	23592599	23251	repeat	Alu	SINE	AluY
12969	1	23597444	23597749	306	MseI-[AA]SmaI	7598	23597749	23261	repeat	Alu	SINE	AluSq2
12972	1	23602520	23602738	219	SmaI[TT]-MseI	7599	23602519	23269	repeat	Alu	SINE	AluY
12973	1	23611414	23611554	141	MseI-[AA]SmaI	7600	23611554	23276	repeat	Alu	SINE	AluSx3
12979	1	23626651	23627177	527	MseI-[AA]SmaI	7603	23627177	23296	repeat	Alu	SINE	AluSg
12983	1	23641429	23641697	269	MseI-[AA]SmaI	7605	23641697	23300	repeat	Alu	SINE	AluSx1
12989	1	23651335	23651557	223	MseI-[AA]SmaI	7608	23651557	23308	repeat	Alu	SINE	AluY
12991	1	23657898	23658104	207	MseI-[AA]SmaI	7609	23658104	23318	repeat	Alu	SINE	AluSp
12996	1	23661504	23661717	214	SmaI[TT]-MseI	7611	23661503	23326	repeat	Alu	SINE	AluY
12997	1	23662314	23662534	221	MseI-[AA]SmaI	7612	23662534	23328	repeat	Alu	SINE	AluYa5
13002	1	23671909	23672124	216	MseI-[AA]SmaI	7615	23672124	23334	repeat	Alu	SINE	AluSq
13004	1	23672261	23672534	274	MseI-[AA]SmaI	7616	23672534	23335	repeat	Alu	SINE	AluSq2
13009	1	23674679	23675087	409	MseI-[AA]SmaI	7619	23675087	23341	repeat	Alu	SINE	AluSp
13011	1	23679398	23679614	217	MseI-[AA]SmaI	7620	23679614	23353	repeat	Alu	SINE	AluY
13017	1	23704405	23704477	73	MseI-[AA]SmaI	7623	23704477	23387	repeat	Alu	SINE	AluSx1
13019	1	23704693	23704780	88	MseI-[AA]SmaI	7624	23704780	23388	repeat	Alu	SINE	AluSx
13022	1	23713307	23713660	354	SmaI[TT]-MseI	7625	23713306	23409	repeat	Alu	SINE	AluY
13023	1	23727896	23728757	862	MseI-[AA]SmaI	7626	23728757	23434	repeat	Alu	SINE	AluSz6
13026	1	23733233	23733954	722	SmaI[TT]-MseI	7627	23733232	23439	repeat	Alu	SINE	AluSz6
13030	1	23741609	23741679	71	SmaI[TT]-MseI	7629	23741608	23450	repeat	Alu	SINE	AluSx
13040	1	23752317	23752535	219	SmaI[TT]-MseI	7635	23752316	23460	repeat	Alu	SINE	AluY
13051	1	23780773	23781084	312	SmaI[TT]-MseI	7641	23780772	23501	repeat	Alu	SINE	AluSx1
13056	1	23788610	23789430	821	SmaI[TT]-MseI	7644	23788609	23515	repeat	Alu	SINE	AluY
13057	1	23794024	23794369	346	MseI-[AA]SmaI	7645	23794369	23530	repeat	Alu	SINE	AluSg7
13060	1	23800554	23800760	207	SmaI[TT]-MseI	7646	23800553	23542	repeat	Alu	SINE	AluSx1
13062	1	23801170	23801385	216	SmaI[TT]-MseI	7647	23801169	23543	repeat	Alu	SINE	AluSx3
13063	1	23802676	23802763	88	MseI-[AA]SmaI	7648	23802763	23545	repeat	Alu	SINE	AluSx1
13067	1	23808696	23808939	244	MseI-[AA]SmaI	7650	23808939	23554	repeat	Alu	SINE	AluSx
13072	1	23813435	23814210	776	SmaI[TT]-MseI	7652	23813434	23563	repeat	Alu	SINE	AluSp
13076	1	23815562	23815775	214	SmaI[TT]-MseI	7654	23815561	23568	repeat	Alu	SINE	AluY
13079	1	23820106	23820596	491	MseI-[AA]SmaI	7656	23820596	23577	repeat	Alu	SINE	AluY
13092	1	23844210	23844587	378	MseI-[AA]SmaI	7663	23844587	23616	repeat	Alu	SINE	AluSz6
13107	1	23866887	23867094	208	SmaI[TT]-MseI	7671	23866886	23667	repeat	Alu	SINE	AluY
13108	1	23867784	23868027	244	MseI-[AA]SmaI	7672	23868027	23669	repeat	Alu	SINE	AluY
13110	1	23868253	23868725	473	SmaI[TT]-MseI	7673	23868252	23670	repeat	Alu	SINE	AluY
13111	1	23872101	23872896	796	MseI-[AA]SmaI	7674	23872896	23684	repeat	Alu	SINE	AluY
13132	1	23908981	23909243	263	SmaI[TT]-MseI	7685	23908980	23756	repeat	Alu	SINE	AluY
13136	1	23911610	23911830	221	SmaI[TT]-MseI	7687	23911609	23765	repeat	Alu	SINE	AluSc
13138	1	23912785	23913110	326	SmaI[TT]-MseI	7688	23912784	23768	repeat	Alu	SINE	AluSg
13140	1	23917483	23917904	422	SmaI[TT]-MseI	7689	23917482	23775	repeat	Alu	SINE	AluSq
13146	1	23921891	23922532	642	SmaI[TT]-MseI	7692	23921890	23784	repeat	Alu	SINE	AluY
13147	1	23926247	23926483	237	MseI-[AA]SmaI	7693	23926483	23788	repeat	Alu	SINE	AluSx
13150	1	23943376	23943597	222	SmaI[TT]-MseI	7694	23943375	23825	repeat	Alu	SINE	AluSz
13153	1	23949645	23950629	985	SmaI[TT]-MseI	7696	23949644	23836	repeat	Alu	SINE	AluY
13155	1	23954619	23954990	372	SmaI[TT]-MseI	7697	23954618	23847	repeat	Alu	SINE	AluYf5
13157	1	23955291	23955510	220	SmaI[TT]-MseI	7698	23955290	23849	repeat	Alu	SINE	AluSx1
13160	1	23962451	23962913	463	SmaI[TT]-MseI	7700	23962450	23861	repeat	Alu	SINE	AluSz
13162	1	23963773	23963977	205	SmaI[TT]-MseI	7701	23963772	23864	repeat	Alu	SINE	AluSg7
13166	1	23968468	23969445	978	SmaI[TT]-MseI	7703	23968467	23870	repeat	Alu	SINE	AluY
13168	1	23975377	23976004	628	SmaI[TT]-MseI	7704	23975376	23882	repeat	Alu	SINE	AluSx
13170	1	23976422	23976649	228	SmaI[TT]-MseI	7705	23976421	23887	repeat	Alu	SINE	AluSx1
13172	1	23978560	23978777	218	SmaI[TT]-MseI	7706	23978559	23891	repeat	Alu	SINE	AluSx
13175	1	23989416	23990011	596	MseI-[AA]SmaI	7708	23990011	23912	repeat	Alu	SINE	AluY
13178	1	24006224	24006462	239	SmaI[TT]-MseI	7709	24006223	23947	repeat	Alu	SINE	AluSx1
13179	1	24007788	24008304	517	MseI-[AA]SmaI	7710	24008304	23953	repeat	Alu	SINE	AluSz6
13181	1	24011794	24012102	309	MseI-[AA]SmaI	7711	24012102	23961	repeat	Alu	SINE	AluSx1
13187	1	24017585	24017832	248	MseI-[AA]SmaI	7714	24017832	23971	repeat	Alu	SINE	AluSz
13192	1	24026837	24027039	203	SmaI[TT]-MseI	7716	24026836	23981	repeat	Alu	SINE	AluSg
13193	1	24029509	24029985	477	MseI-[AA]SmaI	7717	24029985	23989	repeat	Alu	SINE	AluSq2
13195	1	24032104	24032435	332	MseI-[AA]SmaI	7718	24032435	23993	repeat	Alu	SINE	AluSx1
13197	1	24032525	24032736	212	MseI-[AA]SmaI	7719	24032736	23994	repeat	Alu	SINE	AluSc8
13199	1	24032986	24033350	365	MseI-[AA]SmaI	7720	24033350	23997	repeat	Alu	SINE	AluSp
13203	1	24035245	24035607	363	MseI-[AA]SmaI	7722	24035607	24002	repeat	Alu	SINE	AluY
13205	1	24038664	24039027	364	MseI-[AA]SmaI	7723	24039027	24006	repeat	Alu	SINE	AluY
13207	1	24039336	24039801	466	MseI-[AA]SmaI	7724	24039801	24007	repeat	Alu	SINE	AluY
13209	1	24040359	24040582	224	MseI-[AA]SmaI	7725	24040582	24008	repeat	Alu	SINE	AluSx1
13211	1	24040714	24040947	234	MseI-[AA]SmaI	7726	24040947	24009	repeat	Alu	SINE	AluSq2
13215	1	24051349	24051880	532	MseI-[AA]SmaI	7728	24051880	24029	repeat	Alu	SINE	AluY
13222	1	24065945	24066326	382	SmaI[TT]-MseI	7731	24065944	24059	repeat	Alu	SINE	AluSq2
13233	1	24071037	24071184	148	SmaI[TT]-MseI	7738	24071036	24068	repeat	Alu	SINE	AluSg7
13234	1	24072409	24072702	294	MseI-[AA]SmaI	7739	24072702	24069	repeat	Alu	SINE	AluSq2
13239	1	24091822	24092353	532	SmaI[TT]-MseI	7741	24091821	24100	repeat	Alu	SINE	AluSx
13242	1	24096317	24096699	383	MseI-[AA]SmaI	7743	24096699	24113	repeat	Alu	SINE	AluY
13244	1	24097289	24097510	222	MseI-[AA]SmaI	7744	24097510	24117	repeat	Alu	SINE	AluY
13246	1	24101575	24101798	224	MseI-[AA]SmaI	7745	24101798	24123	repeat	Alu	SINE	AluSx1
13249	1	24104049	24104265	217	SmaI[TT]-MseI	7746	24104048	24130	repeat	Alu	SINE	AluSc
13250	1	24108568	24108833	266	MseI-[AA]SmaI	7747	24108833	24138	repeat	Alu	SINE	AluSx1
13252	1	24114849	24115054	206	MseI-[AA]SmaI	7748	24115054	24148	repeat	Alu	SINE	AluYc
13255	1	24116486	24117016	531	SmaI[TT]-MseI	7749	24116485	24150	repeat	Alu	SINE	AluY
13270	1	24129618	24130138	521	SmaI[TT]-MseI	7758	24129617	24159	repeat	Alu	SINE	AluSx
13274	1	24135822	24136042	221	SmaI[TT]-MseI	7760	24135821	24168	repeat	Alu	SINE	AluY
13275	1	24145925	24146143	219	MseI-[AA]SmaI	7761	24146143	24185	repeat	Alu	SINE	AluSx1
13282	1	24154980	24155360	381	SmaI[TT]-MseI	7764	24154979	24204	repeat	Alu	SINE	AluSx1
13284	1	24161869	24162092	224	SmaI[TT]-MseI	7765	24161868	24218	repeat	Alu	SINE	AluY
13288	1	24165994	24166202	209	SmaI[TT]-MseI	7767	24165993	24221	repeat	Alu	SINE	AluSc8
13289	1	24176495	24176730	236	MseI-[AA]SmaI	7768	24176730	24238	repeat	Alu	SINE	AluSq2
13291	1	24177616	24177778	163	MseI-[AA]SmaI	7769	24177778	24241	repeat	Alu	SINE	AluSx
13296	1	24184251	24184472	222	SmaI[TT]-MseI	7771	24184250	24249	repeat	Alu	SINE	AluY
13297	1	24187515	24187737	223	MseI-[AA]SmaI	7772	24187737	24256	repeat	Alu	SINE	AluY
13300	1	24190670	24190891	222	SmaI[TT]-MseI	7773	24190669	24262	repeat	Alu	SINE	AluY
13306	1	24203791	24204049	259	MseI-[AA]SmaI	7777	24204049	24280	repeat	Alu	SINE	AluY
13310	1	24210019	24210239	221	MseI-[AA]SmaI	7779	24210239	24293	repeat	Alu	SINE	AluSx3
13315	1	24213489	24213559	71	SmaI[TT]-MseI	7781	24213488	24304	repeat	Alu	SINE	AluSz6
13321	1	24222090	24222297	208	SmaI[TT]-MseI	7784	24222089	24325	repeat	Alu	SINE	AluSc
13329	1	24230756	24231173	418	SmaI[TT]-MseI	7788	24230755	24341	repeat	Alu	SINE	AluSx1
13331	1	24231764	24232005	242	SmaI[TT]-MseI	7789	24231763	24342	repeat	Alu	SINE	AluSx1
13334	1	24234074	24234160	87	SmaI[TT]-MseI	7791	24234073	24349	repeat	Alu	SINE	AluSz
13336	1	24246133	24246349	217	SmaI[TT]-MseI	7792	24246132	24375	repeat	Alu	SINE	AluY
13338	1	24251093	24251748	656	SmaI[TT]-MseI	7793	24251092	24383	repeat	Alu	SINE	AluSp
13341	1	24252944	24253030	87	SmaI[TT]-MseI	7795	24252943	24387	repeat	Alu	SINE	AluY
13343	1	24254587	24254958	372	SmaI[TT]-MseI	7796	24254586	24390	repeat	Alu	SINE	AluY
13348	1	24266426	24266646	221	SmaI[TT]-MseI	7799	24266425	24408	repeat	Alu	SINE	AluSx
13349	1	24274741	24275072	332	MseI-[AA]SmaI	7800	24275072	24421	repeat	Alu	SINE	AluY
13358	1	24301014	24301243	230	MseI-[AA]SmaI	7805	24301243	24452	repeat	Alu	SINE	AluSx
13361	1	24309567	24309706	140	SmaI[TT]-MseI	7806	24309566	24455	repeat	Alu	SINE	AluSz
13363	1	24310193	24310726	534	SmaI[TT]-MseI	7807	24310192	24456	repeat	Alu	SINE	AluSg4
13365	1	24317983	24318615	633	SmaI[TT]-MseI	7808	24317982	24467	repeat	Alu	SINE	AluYc
13367	1	24318696	24319214	519	SmaI[TT]-MseI	7809	24318695	24468	repeat	Alu	SINE	AluSp
13373	1	24347405	24347475	71	SmaI[TT]-MseI	7812	24347404	24511	repeat	Alu	SINE	AluSx
13376	1	24351490	24351716	227	MseI-[AA]SmaI	7814	24351716	24517	repeat	Alu	SINE	AluSx1
13379	1	24352547	24352751	205	SmaI[TT]-MseI	7815	24352546	24519	repeat	Alu	SINE	AluSx
13381	1	24360398	24360614	217	SmaI[TT]-MseI	7816	24360397	24535	repeat	Alu	SINE	AluSq
13382	1	24361481	24361815	335	MseI-[AA]SmaI	7817	24361815	24537	repeat	Alu	SINE	AluSc
13384	1	24377289	24377506	218	MseI-[AA]SmaI	7818	24377506	NA	NULL	Unique	NULL	NULL
[truncated: 142,109 more rows]
