# Supplementary material for: The epigenetic landscape of Alu repeats delineates the structural and functional genomic architecture of colon cancer cells
Source: HighWire-hosted journal article supplement (doi:10.1101/gr.207522.116), 2016-12-20
Supplement: Supplemental_Data_S2.xlsx [file Supplemental_Data_S2.xlsx]

## Sheet: Description
Supplemental Data S2. Differential representation of NSUMA canonical amplicons in sample comparisons.
Mireia Jordà et al.
Each sheet displays a comparison indicated as the sheet's name
Fields	Description
ampID	NSUMA canonical amplicon ID
position	amplicon location in hg19
369_blood	no of NSUMA normalized reads in sample
544_blood	no of NSUMA normalized reads in sample
557_blood	no of NSUMA normalized reads in sample
369_normalcolon	no of NSUMA normalized reads in sample
544_normalcolon	no of NSUMA normalized reads in sample
557_normalcolon	no of NSUMA normalized reads in sample
369_Tumor	no of NSUMA normalized reads in sample
544_Tumor	no of NSUMA normalized reads in sample
557_Tumor	no of NSUMA normalized reads in sample
HCT116_r1	no of NSUMA normalized reads in sample
HCT116_r2	no of NSUMA normalized reads in sample
HCT116_r3	no of NSUMA normalized reads in sample
DKO_r1	no of NSUMA normalized reads in sample
DKO_r2	no of NSUMA normalized reads in sample
DKO_r3	no of NSUMA normalized reads in sample
baseMean	Mean normalized reads in compared samples
baseMeanA	Mean normalized reads in compared samples set A
baseMeanB	Mean normalized reads in compared samples set B
log2FoldChange2	Log2 ((baseMeanA+1)/(baseMeanB+1))
pval_pooled	Limma p value
padj_pooled	Adjusted p value

## Sheet: Blood_Colon
ampID	position	369_blood	544_blood	557_blood	369_normalcolon	544_normalcolon	557_normalcolon	baseMean	baseMeanA	baseMeanB	log2FoldChange2	pval_pooled	padj_pooled
90	chr1:532834-533049	2	1	2	8	2	1	2.66667	1.66667	3.66667	0.807355	0.456822	1
105	chr1:553796-554017	0	0	0	0	1	0	0.166667	0	0.333333	0.415037	1	1
135	chr1:713050-713269	0	0	0	1	0	0	0.166667	0	0.333333	0.415037	1	1
141	chr1:714699-714925	0	1	0	2	0	0	0.5	0.333333	0.666667	0.321928	1	1
165	chr1:818435-818753	0	1	0	2	0	1	0.666667	0.333333	1	0.584963	0.625	1
173	chr1:830684-830922	0	0	0	1	0	1	0.333333	0	0.666667	0.736966	0.5	1
178	chr1:837868-838078	1	1	1	10	5	2	3.33333	1	5.66667	1.73697	0.0488324	1
294	chr1:893542-894175	1	1	1	1	0	0	0.666667	1	0.333333	-0.584963	0.625	1
388	chr1:920356-920565	3	5	3	11	5	4	5.16667	3.66667	6.66667	0.716207	0.242251	1
392	chr1:921563-921903	1	1	0	2	0	0	0.666667	0.666667	0.666667	0	1	1
394	chr1:923133-923351	1	1	1	3	1	1	1.33333	1	1.66667	0.415037	0.726563	1
398	chr1:927633-927860	0	1	1	0	1	0	0.5	0.666667	0.333333	-0.321928	1	1
417	chr1:937878-938004	1	1	0	1	1	1	0.833333	0.666667	1	0.263034	1	1
422	chr1:942541-942893	0	0	0	2	0	0	0.333333	0	0.666667	0.736966	0.666667	1
426	chr1:944301-944579	1	1	1	3	0	0	1	1	1	0	1	1
428	chr1:945258-945855	0	0	0	3	1	1	0.833333	0	1.66667	1.41504	0.0625	1
489	chr1:992844-993392	1	0	0	3	1	0	0.833333	0.333333	1.33333	0.807355	0.491203	1
498	chr1:996448-996661	0	1	0	3	1	1	1	0.333333	1.66667	1	0.21875	1
573	chr1:1055922-1056208	1	0	0	4	0	0	0.833333	0.333333	1.33333	0.807355	0.660778	1
636	chr1:1094409-1094631	0	0	0	21	8	5	5.66667	0	11.3333	3.62449	0.00179631	0.209843
687	chr1:1125901-1126051	0	1	0	2	1	1	0.833333	0.333333	1.33333	0.807355	0.375	1
689	chr1:1126299-1126510	0	0	0	1	0	0	0.166667	0	0.333333	0.415037	1	1
709	chr1:1144912-1145410	0	0	0	1	0	0	0.166667	0	0.333333	0.415037	1	1
773	chr1:1197331-1197609	0	0	0	2	0	0	0.333333	0	0.666667	0.736966	0.666667	1
777	chr1:1201101-1201327	0	0	0	2	0	1	0.5	0	1	1	0.25	1
795	chr1:1214876-1215093	0	0	0	1	1	1	0.5	0	1	1	0.25	1
796	chr1:1215413-1215768	0	0	0	0	1	0	0.166667	0	0.333333	0.415037	1	1
837	chr1:1253737-1253962	0	1	0	12	8	6	4.5	0.333333	8.66667	2.85798	9.01221e-07	0.000664354
896	chr1:1292894-1293114	3	2	2	27	8	7	8.16667	2.33333	14	2.16993	0.0550361	1
900	chr1:1297862-1298085	0	0	0	3	1	1	0.833333	0	1.66667	1.41504	0.0625	1
902	chr1:1299374-1299716	1	0	1	2	1	1	1	0.666667	1.33333	0.485427	0.6875	1
904	chr1:1304630-1304846	1	0	1	2	0	0	0.666667	0.666667	0.666667	0	1	1
915	chr1:1313660-1313998	0	0	0	0	1	0	0.166667	0	0.333333	0.415037	1	1
935	chr1:1338067-1338433	0	0	0	3	0	0	0.5	0	1	1	0.55	1
939	chr1:1341436-1341655	7	3	2	16	8	3	6.5	4	9	1	0.249757	1
947	chr1:1344388-1344454	0	1	0	1	1	2	0.833333	0.333333	1.33333	0.807355	0.375	1
949	chr1:1344532-1344732	0	1	0	3	0	0	0.666667	0.333333	1	0.584963	0.775401	1
953	chr1:1352137-1352356	0	0	0	1	0	0	0.166667	0	0.333333	0.415037	1	1
990	chr1:1383199-1383423	1	1	0	1	2	0	0.833333	0.666667	1	0.263034	1	1
993	chr1:1386514-1386728	2	1	0	15	5	2	4.16667	1	7.33333	2.05889	0.098405	1
1000	chr1:1388676-1389335	0	0	0	1	1	1	0.5	0	1	1	0.25	1
1056	chr1:1428027-1428243	0	0	0	1	0	0	0.166667	0	0.333333	0.415037	1	1
1069	chr1:1435371-1435636	0	0	0	2	1	0	0.5	0	1	1	0.25	1
1073	chr1:1436728-1437195	0	0	0	1	1	1	0.5	0	1	1	0.25	1
1076	chr1:1437985-1438267	0	0	1	1	0	1	0.5	0.333333	0.666667	0.321928	1	1
1160	chr1:1492495-1493102	0	0	0	1	0	0	0.166667	0	0.333333	0.415037	1	1
1165	chr1:1500431-1500677	0	0	0	1	0	0	0.166667	0	0.333333	0.415037	1	1
1172	chr1:1507268-1507488	0	1	0	1	0	0	0.333333	0.333333	0.333333	0	1	1
1175	chr1:1511056-1511299	3	1	1	6	6	3	3.33333	1.66667	5	1.16993	0.0413895	1
1181	chr1:1520022-1520239	1	1	0	6	1	2	1.83333	0.666667	3	1.26303	0.192287	1
1183	chr1:1520778-1521155	0	1	0	2	0	0	0.5	0.333333	0.666667	0.321928	1	1
1185	chr1:1521945-1522158	1	1	1	3	1	1	1.33333	1	1.66667	0.415037	0.726563	1
1188	chr1:1522864-1523220	0	1	0	1	0	0	0.333333	0.333333	0.333333	0	1	1
1189	chr1:1523221-1523446	1	1	1	1	2	0	1	1	1	0	1	1
1194	chr1:1526731-1527054	1	0	0	1	1	1	0.666667	0.333333	1	0.584963	0.625	1
1260	chr1:1587008-1587261	0	1	0	5	2	1	1.5	0.333333	2.66667	1.45943	0.0955177	1
1269	chr1:1591102-1591454	1	1	0	3	1	0	1	0.666667	1.33333	0.485427	0.730304	1
1281	chr1:1604524-1605033	0	0	0	1	0	0	0.166667	0	0.333333	0.415037	1	1
1293	chr1:1610974-1611490	0	1	0	1	2	0	0.666667	0.333333	1	0.584963	0.625	1
1344	chr1:1643249-1643493	0	0	0	1	0	0	0.166667	0	0.333333	0.415037	1	1
1354	chr1:1656391-1656743	0	0	0	2	1	0	0.5	0	1	1	0.25	1
1400	chr1:1698447-1698750	0	0	0	2	0	0	0.333333	0	0.666667	0.736966	0.666667	1
1401	chr1:1707592-1708136	0	0	1	3	0	0	0.666667	0.333333	1	0.584963	0.775401	1
1412	chr1:1716096-1716185	2	2	0	11	9	4	4.66667	1.33333	8	1.94753	0.00211301	0.224934
1420	chr1:1736281-1736525	0	0	0	2	1	0	0.5	0	1	1	0.25	1
1435	chr1:1756105-1756453	0	0	0	3	1	0	0.666667	0	1.33333	1.22239	0.250526	1
1452	chr1:1791606-1792471	1	1	0	0	1	0	0.5	0.666667	0.333333	-0.321928	1	1
1458	chr1:1796317-1796625	0	1	1	4	0	1	1.16667	0.666667	1.66667	0.678072	0.605225	1
1464	chr1:1799708-1799923	0	0	0	0	1	0	0.166667	0	0.333333	0.415037	1	1
1465	chr1:1811743-1811949	0	0	0	6	5	2	2.16667	0	4.33333	2.41504	0.000244141	0.0512232
1468	chr1:1816215-1816450	0	0	0	2	1	1	0.666667	0	1.33333	1.22239	0.125	1
1474	chr1:1818238-1818460	1	1	0	4	5	0	1.83333	0.666667	3	1.26303	0.192287	1
1476	chr1:1819148-1819223	1	1	1	0	1	0	0.666667	1	0.333333	-0.584963	0.625	1
1477	chr1:1819780-1820201	0	1	0	0	0	0	0.166667	0.333333	0	-0.415037	1	1
1493	chr1:1828425-1828824	0	0	0	4	0	1	0.833333	0	1.66667	1.41504	0.251121	1
1541	chr1:1872250-1872476	1	1	0	1	1	0	0.666667	0.666667	0.666667	0	1	1
1549	chr1:1876448-1876670	4	1	0	7	1	0	2.16667	1.66667	2.66667	0.459432	0.801519	1
1559	chr1:1880691-1880952	1	1	0	3	1	1	1.16667	0.666667	1.66667	0.678072	0.453125	1
1561	chr1:1884828-1885481	1	0	0	0	0	0	0.166667	0.333333	0	-0.415037	1	1
1587	chr1:1903775-1904209	0	1	1	0	0	0	0.333333	0.666667	0	-0.736966	0.5	1
1612	chr1:1922873-1922966	0	1	0	3	1	1	1	0.333333	1.66667	1	0.21875	1
1616	chr1:1926721-1926855	0	1	0	1	0	0	0.333333	0.333333	0.333333	0	1	1
1618	chr1:1927052-1927271	0	1	1	0	0	0	0.333333	0.666667	0	-0.736966	0.5	1
1624	chr1:1936092-1936316	4	4	3	9	1	2	3.83333	3.66667	4	0.0995357	1	1
1626	chr1:1939160-1939372	1	2	0	7	2	2	2.33333	1	3.66667	1.22239	0.178286	1
1628	chr1:1939968-1940188	1	2	0	5	1	1	1.66667	1	2.33333	0.736966	0.498131	1
1630	chr1:1944170-1944438	0	0	0	1	1	1	0.5	0	1	1	0.25	1
1649	chr1:1957973-1958198	6	6	5	3	2	1	3.83333	5.66667	2	-1.152	0.0346897	1
1661	chr1:1966260-1966498	1	1	0	3	3	1	1.5	0.666667	2.33333	1	0.179688	1
1666	chr1:1971819-1972039	1	1	1	2	1	1	1.16667	1	1.33333	0.222392	1	1
1706	chr1:1996928-1997042	0	0	0	0	1	0	0.166667	0	0.333333	0.415037	1	1
1729	chr1:2018615-2019004	0	0	0	1	0	0	0.166667	0	0.333333	0.415037	1	1
1775	chr1:2070740-2070952	0	0	0	2	1	0	0.5	0	1	1	0.25	1
1813	chr1:2120148-2120368	0	1	0	1	1	0	0.5	0.333333	0.666667	0.321928	1	1
1819	chr1:2122889-2123104	0	0	0	2	0	0	0.333333	0	0.666667	0.736966	0.666667	1
1920	chr1:2207045-2207260	1	0	0	2	2	1	1	0.333333	1.66667	1	0.21875	1
1933	chr1:2219521-2219872	0	0	0	1	0	0	0.166667	0	0.333333	0.415037	1	1
2020	chr1:2293364-2293595	0	1	0	2	1	0	0.666667	0.333333	1	0.584963	0.625	1
2069	chr1:2342768-2342990	0	0	0	1	1	0	0.333333	0	0.666667	0.736966	0.5	1
2081	chr1:2352477-2352847	1	0	1	1	0	0	0.5	0.666667	0.333333	-0.321928	1	1
2276	chr1:2510809-2511131	0	0	0	3	0	1	0.666667	0	1.33333	1.22239	0.250526	1
2373	chr1:2695960-2696299	1	1	0	6	1	1	1.66667	0.666667	2.66667	1.1375	0.327034	1
2760	chr1:3117000-3117217	0	1	1	2	2	0	1	0.666667	1.33333	0.485427	0.6875	1
2900	chr1:3260291-3260602	1	1	1	4	0	1	1.33333	1	1.66667	0.415037	0.7871	1
2951	chr1:3307493-3307714	0	1	0	1	1	1	0.666667	0.333333	1	0.584963	0.625	1
3021	chr1:3360139-3360429	2	2	0	4	1	1	1.66667	1.33333	2	0.36257	0.784535	1
3238	chr1:3576339-3576552	1	1	0	2	1	2	1.16667	0.666667	1.66667	0.678072	0.453125	1
3331	chr1:3674846-3675152	1	0	0	1	1	0	0.5	0.333333	0.666667	0.321928	1	1
3360	chr1:3709118-3709325	1	0	1	0	1	0	0.5	0.666667	0.333333	-0.321928	1	1
3363	chr1:3710021-3710683	1	0	0	0	0	0	0.166667	0.333333	0	-0.415037	1	1
3365	chr1:3711320-3711542	0	0	0	2	1	0	0.5	0	1	1	0.25	1
3374	chr1:3727172-3727395	1	0	0	2	1	0	0.666667	0.333333	1	0.584963	0.625	1
3376	chr1:3729045-3729328	0	0	0	1	1	0	0.333333	0	0.666667	0.736966	0.5	1
3383	chr1:3732346-3732738	10	3	5	3	0	0	3.5	6	1	-1.80735	0.0312438	1
3391	chr1:3740744-3741067	0	0	0	1	0	0	0.166667	0	0.333333	0.415037	1	1
3397	chr1:3749642-3749859	1	0	0	0	0	0	0.166667	0.333333	0	-0.415037	1	1
3399	chr1:3756894-3757436	0	0	0	1	1	0	0.333333	0	0.666667	0.736966	0.5	1
3407	chr1:3764492-3764632	0	0	0	0	0	1	0.166667	0	0.333333	0.415037	1	1
3412	chr1:3772684-3772870	7	7	4	15	11	7	8.5	6	11	0.777608	0.062355	1
3462	chr1:3814543-3814996	0	0	0	0	1	0	0.166667	0	0.333333	0.415037	1	1
3468	chr1:3818543-3818763	0	1	0	0	1	0	0.333333	0.333333	0.333333	0	1	1
3479	chr1:3830509-3831410	0	0	0	1	0	0	0.166667	0	0.333333	0.415037	1	1
3498	chr1:4022612-4023426	0	0	1	1	0	0	0.333333	0.333333	0.333333	0	1	1
3511	chr1:4048944-4049029	0	1	1	0	1	1	0.666667	0.666667	0.666667	0	1	1
3533	chr1:4114513-4114583	1	6	6	5	3	8	4.83333	4.33333	5.33333	0.247928	0.764394	1
3570	chr1:4221061-4221283	0	0	0	1	0	0	0.166667	0	0.333333	0.415037	1	1
3584	chr1:4255876-4256085	2	3	0	8	1	2	2.66667	1.66667	3.66667	0.807355	0.487226	1
3586	chr1:4271126-4271373	0	1	0	1	1	0	0.5	0.333333	0.666667	0.321928	1	1
3591	chr1:4279462-4279679	0	0	0	1	0	0	0.166667	0	0.333333	0.415037	1	1
3594	chr1:4287191-4287439	0	1	0	3	1	0	0.833333	0.333333	1.33333	0.807355	0.491203	1
3596	chr1:4290328-4290639	0	0	0	1	0	0	0.166667	0	0.333333	0.415037	1	1
3606	chr1:4334390-4334673	1	1	0	4	0	0	1	0.666667	1.33333	0.485427	0.823119	1
3642	chr1:4467470-4467706	0	0	0	1	0	0	0.166667	0	0.333333	0.415037	1	1
3655	chr1:4557814-4558322	1	0	0	1	0	0	0.333333	0.333333	0.333333	0	1	1
3681	chr1:4623160-4623445	0	1	0	1	0	0	0.333333	0.333333	0.333333	0	1	1
3697	chr1:4678847-4679095	0	0	0	1	1	0	0.333333	0	0.666667	0.736966	0.5	1
3733	chr1:4748509-4748756	1	0	0	1	1	0	0.5	0.333333	0.666667	0.321928	1	1
3832	chr1:5056501-5056909	1	0	0	2	1	1	0.833333	0.333333	1.33333	0.807355	0.375	1
3833	chr1:5078409-5078748	0	0	0	2	1	0	0.5	0	1	1	0.25	1
3848	chr1:5194769-5195065	0	0	0	1	0	0	0.166667	0	0.333333	0.415037	1	1
3853	chr1:5219425-5219912	0	0	0	1	0	0	0.166667	0	0.333333	0.415037	1	1
3868	chr1:5284460-5284665	4	5	1	11	6	2	4.83333	3.33333	6.33333	0.758992	0.353299	1
3875	chr1:5322716-5322942	1	1	0	6	1	1	1.66667	0.666667	2.66667	1.1375	0.327034	1
3891	chr1:5355548-5355847	1	0	0	2	0	0	0.5	0.333333	0.666667	0.321928	1	1
3900	chr1:5405202-5405422	1	1	0	2	0	1	0.833333	0.666667	1	0.263034	1	1
3902	chr1:5408615-5408834	0	1	0	3	1	1	1	0.333333	1.66667	1	0.21875	1
3903	chr1:5411783-5412017	0	1	0	0	0	0	0.166667	0.333333	0	-0.415037	1	1
3909	chr1:5443838-5444063	4	3	1	11	5	2	4.33333	2.66667	6	0.932886	0.280504	1
3931	chr1:5525019-5525196	1	0	1	0	1	0	0.5	0.666667	0.333333	-0.321928	1	1
3961	chr1:5583321-5583552	1	0	0	3	1	0	0.833333	0.333333	1.33333	0.807355	0.491203	1
3972	chr1:5652631-5652848	0	1	0	1	1	1	0.666667	0.333333	1	0.584963	0.625	1
3977	chr1:5656209-5656432	2	2	1	2	2	0	1.5	1.66667	1.33333	-0.192645	1	1
4002	chr1:5726649-5726921	4	2	2	4	2	1	2.5	2.66667	2.33333	-0.137504	1	1
4013	chr1:5757926-5758033	3	4	2	13	12	3	6.16667	3	9.33333	1.36923	0.0555643	1
4018	chr1:5763971-5764220	0	0	0	2	1	0	0.5	0	1	1	0.25	1
4059	chr1:5830191-5830573	0	0	0	1	0	0	0.166667	0	0.333333	0.415037	1	1
4066	chr1:5844296-5844486	1	1	0	2	0	0	0.666667	0.666667	0.666667	0	1	1
4073	chr1:5871522-5872263	0	1	0	1	0	0	0.333333	0.333333	0.333333	0	1	1
4197	chr1:6068385-6068605	3	3	1	1	0	0	1.33333	2.33333	0.333333	-1.32193	0.0703125	1
4216	chr1:6098028-6098250	1	2	1	3	3	0	1.66667	1.33333	2	0.36257	0.753906	1
4286	chr1:6174631-6174998	0	0	0	1	0	0	0.166667	0	0.333333	0.415037	1	1
4321	chr1:6218133-6218991	0	0	0	0	1	0	0.166667	0	0.333333	0.415037	1	1
4352	chr1:6242220-6242440	2	1	1	4	1	0	1.5	1.33333	1.66667	0.192645	1	1
4353	chr1:6246937-6247598	1	0	0	0	1	0	0.333333	0.333333	0.333333	0	1	1
4377	chr1:6288788-6289017	0	0	0	1	0	0	0.166667	0	0.333333	0.415037	1	1
4388	chr1:6296935-6297149	0	2	5	5	1	2	2.5	2.33333	2.66667	0.137504	1	1
4408	chr1:6315352-6316025	0	0	0	1	0	0	0.166667	0	0.333333	0.415037	1	1
4433	chr1:6335629-6335701	1	2	1	2	0	1	1.16667	1.33333	1	-0.222392	1	1
4442	chr1:6344474-6344560	0	1	1	2	1	1	1	0.666667	1.33333	0.485427	0.6875	1
4449	chr1:6358288-6358984	0	0	0	1	1	0	0.333333	0	0.666667	0.736966	0.5	1
4457	chr1:6381668-6381873	1	0	0	1	0	0	0.333333	0.333333	0.333333	0	1	1
4460	chr1:6385164-6385382	1	0	0	0	0	0	0.166667	0.333333	0	-0.415037	1	1
4463	chr1:6387927-6388147	0	1	0	0	0	0	0.166667	0.333333	0	-0.415037	1	1
4496	chr1:6425531-6425752	0	0	0	1	0	0	0.166667	0	0.333333	0.415037	1	1
4507	chr1:6439049-6439473	0	0	0	1	1	0	0.333333	0	0.666667	0.736966	0.5	1
4508	chr1:6441897-6442122	0	0	0	1	0	0	0.166667	0	0.333333	0.415037	1	1
4513	chr1:6443858-6444081	0	0	0	2	1	0	0.5	0	1	1	0.25	1
4517	chr1:6448262-6448485	0	0	0	0	1	0	0.166667	0	0.333333	0.415037	1	1
4529	chr1:6458623-6458842	1	1	0	1	1	0	0.666667	0.666667	0.666667	0	1	1
4530	chr1:6464447-6464692	2	1	1	5	2	2	2.16667	1.33333	3	0.777608	0.266846	1
4558	chr1:6499777-6499993	2	1	2	5	1	2	2.16667	1.66667	2.66667	0.459432	0.59522	1
4605	chr1:6538797-6539009	0	1	0	0	1	0	0.333333	0.333333	0.333333	0	1	1
4635	chr1:6563561-6563779	0	1	0	1	2	1	0.833333	0.333333	1.33333	0.807355	0.375	1
4637	chr1:6564723-6565631	0	0	0	2	0	0	0.333333	0	0.666667	0.736966	0.666667	1
4645	chr1:6576421-6576641	0	1	1	3	1	1	1.16667	0.666667	1.66667	0.678072	0.453125	1
4651	chr1:6583342-6583563	0	1	0	1	0	0	0.333333	0.333333	0.333333	0	1	1
4659	chr1:6598388-6598956	0	0	0	2	0	1	0.5	0	1	1	0.25	1
4662	chr1:6600139-6600494	0	0	0	0	1	0	0.166667	0	0.333333	0.415037	1	1
4668	chr1:6610185-6610461	0	0	0	0	1	0	0.166667	0	0.333333	0.415037	1	1
4669	chr1:6611698-6612019	0	0	0	1	0	0	0.166667	0	0.333333	0.415037	1	1
4672	chr1:6612965-6613186	0	0	0	2	1	1	0.666667	0	1.33333	1.22239	0.125	1
4673	chr1:6613603-6613826	10	5	3	15	5	4	7	6	8	0.36257	0.687064	1
4677	chr1:6616773-6617043	0	0	0	2	0	0	0.333333	0	0.666667	0.736966	0.666667	1
4685	chr1:6628164-6628439	1	0	0	0	1	0	0.333333	0.333333	0.333333	0	1	1
4688	chr1:6633816-6634031	0	0	0	1	0	0	0.166667	0	0.333333	0.415037	1	1
4708	chr1:6655962-6656383	1	1	1	3	1	1	1.33333	1	1.66667	0.415037	0.726563	1
4720	chr1:6665439-6665620	0	1	0	4	3	2	1.66667	0.333333	3	1.58496	0.0214844	0.866721
4726	chr1:6670307-6670674	0	0	0	1	0	0	0.166667	0	0.333333	0.415037	1	1
4728	chr1:6671388-6671694	0	0	0	4	0	0	0.666667	0	1.33333	1.22239	0.483516	1
4731	chr1:6672306-6672533	0	0	0	4	2	1	1.16667	0	2.33333	1.73697	0.015625	0.723151
4745	chr1:6677240-6677801	1	0	0	5	1	0	1.16667	0.333333	2	1.16993	0.402927	1
4757	chr1:6691390-6692031	0	0	0	1	0	0	0.166667	0	0.333333	0.415037	1	1
4768	chr1:6708309-6708680	1	0	0	1	1	0	0.5	0.333333	0.666667	0.321928	1	1
4777	chr1:6732755-6733321	0	0	0	0	0	1	0.166667	0	0.333333	0.415037	1	1
4782	chr1:6747510-6747965	0	0	0	0	1	0	0.166667	0	0.333333	0.415037	1	1
4788	chr1:6753537-6754218	0	0	0	1	0	0	0.166667	0	0.333333	0.415037	1	1
4796	chr1:6762290-6762360	3	3	4	2	3	3	3	3.33333	2.66667	-0.241008	0.814529	1
4804	chr1:6772889-6773255	0	0	0	1	0	0	0.166667	0	0.333333	0.415037	1	1
4812	chr1:6780667-6780900	1	0	0	1	0	0	0.333333	0.333333	0.333333	0	1	1
4820	chr1:6788414-6788630	0	2	0	2	2	1	1.16667	0.666667	1.66667	0.678072	0.453125	1
4822	chr1:6792585-6793087	0	0	0	1	0	0	0.166667	0	0.333333	0.415037	1	1
4823	chr1:6795384-6795626	5	2	3	4	6	1	3.5	3.33333	3.66667	0.106915	1	1
4827	chr1:6797269-6797903	1	0	1	0	0	0	0.333333	0.666667	0	-0.736966	0.5	1
4833	chr1:6805055-6805265	5	4	1	1	1	0	2	3.33333	0.666667	-1.37851	0.0548716	1
4838	chr1:6812039-6812553	3	1	1	1	0	0	1	1.66667	0.333333	-1	0.21875	1
4842	chr1:6822860-6823163	0	0	0	1	1	0	0.333333	0	0.666667	0.736966	0.5	1
4851	chr1:6841339-6841552	0	0	0	1	0	0	0.166667	0	0.333333	0.415037	1	1
4870	chr1:6888445-6888720	0	0	0	1	0	0	0.166667	0	0.333333	0.415037	1	1
4875	chr1:6897107-6897327	2	2	2	1	0	0	1.16667	2	0.333333	-1.16993	0.125	1
4882	chr1:6920674-6920896	0	0	0	1	0	0	0.166667	0	0.333333	0.415037	1	1
4884	chr1:6921118-6921421	1	0	0	7	0	1	1.5	0.333333	2.66667	1.45943	0.36644	1
4886	chr1:6922116-6922428	0	0	0	2	0	1	0.5	0	1	1	0.25	1
4890	chr1:6965347-6965715	5	3	2	1	0	0	1.83333	3.33333	0.333333	-1.70044	0.0117188	0.640547
4933	chr1:7057814-7057991	0	1	0	7	2	1	1.83333	0.333333	3.33333	1.70044	0.131543	1
4949	chr1:7093747-7094014	0	0	0	2	0	0	0.333333	0	0.666667	0.736966	0.666667	1
4952	chr1:7097610-7097822	0	1	0	0	0	0	0.166667	0.333333	0	-0.415037	1	1
4978	chr1:7171559-7171869	7	3	3	7	2	1	3.83333	4.33333	3.33333	-0.29956	0.773237	1
4983	chr1:7186924-7187566	1	0	0	0	0	0	0.166667	0.333333	0	-0.415037	1	1
4990	chr1:7217105-7217329	0	0	0	1	0	0	0.166667	0	0.333333	0.415037	1	1
4995	chr1:7263985-7264228	1	0	0	1	1	0	0.5	0.333333	0.666667	0.321928	1	1
4997	chr1:7274520-7274734	1	1	1	2	0	0	0.833333	1	0.666667	-0.263034	1	1
5011	chr1:7298645-7298867	2	1	0	4	0	1	1.33333	1	1.66667	0.415037	0.809635	1
5026	chr1:7344357-7344624	1	1	0	1	0	0	0.5	0.666667	0.333333	-0.321928	1	1
5031	chr1:7360422-7360661	1	1	0	6	1	1	1.66667	0.666667	2.66667	1.1375	0.327034	1
5037	chr1:7387177-7387391	1	0	0	0	0	0	0.166667	0.333333	0	-0.415037	1	1
5120	chr1:7590968-7591186	0	1	0	4	2	2	1.5	0.333333	2.66667	1.45943	0.0390625	1
5199	chr1:7743042-7743159	0	1	0	0	1	1	0.5	0.333333	0.666667	0.321928	1	1
5223	chr1:7817539-7817720	2	1	1	3	0	1	1.33333	1.33333	1.33333	0	1	1
5227	chr1:7825793-7826011	1	0	0	0	0	0	0.166667	0.333333	0	-0.415037	1	1
5233	chr1:7838942-7839179	1	0	0	1	0	0	0.333333	0.333333	0.333333	0	1	1
5245	chr1:7848611-7848888	0	0	0	1	0	0	0.166667	0	0.333333	0.415037	1	1
5276	chr1:7955133-7955353	2	1	0	3	1	1	1.33333	1	1.66667	0.415037	0.726563	1
5281	chr1:7963540-7963762	11	11	8	21	10	5	11	10	12	0.241008	0.732055	1
5282	chr1:7964667-7964888	0	0	0	4	1	1	1	0	2	1.58496	0.0746606	1
5287	chr1:7977083-7977636	0	1	0	2	1	1	0.833333	0.333333	1.33333	0.807355	0.375	1
5291	chr1:7990123-7990361	2	1	0	6	3	1	2.16667	1	3.33333	1.11548	0.195709	1
5293	chr1:7993509-7993679	3	0	1	4	2	2	2	1.33333	2.66667	0.652077	0.387695	1
5302	chr1:8015181-8015419	0	1	0	2	1	0	0.666667	0.333333	1	0.584963	0.625	1
5306	chr1:8023537-8023750	0	0	0	2	1	1	0.666667	0	1.33333	1.22239	0.125	1
5311	chr1:8032671-8033034	2	0	0	1	0	0	0.5	0.666667	0.333333	-0.321928	1	1
5325	chr1:8052699-8052927	0	0	0	1	0	0	0.166667	0	0.333333	0.415037	1	1
5328	chr1:8055948-8056262	0	0	0	1	0	0	0.166667	0	0.333333	0.415037	1	1
5330	chr1:8068481-8068701	0	0	0	0	1	0	0.166667	0	0.333333	0.415037	1	1
5340	chr1:8089943-8090660	0	1	0	1	1	0	0.5	0.333333	0.666667	0.321928	1	1
5343	chr1:8105788-8106034	0	1	0	2	1	0	0.666667	0.333333	1	0.584963	0.625	1
5348	chr1:8118211-8118429	1	0	0	1	0	0	0.333333	0.333333	0.333333	0	1	1
5352	chr1:8125991-8126210	1	0	0	0	1	0	0.333333	0.333333	0.333333	0	1	1
5357	chr1:8134048-8134442	3	0	1	1	0	1	1	1.33333	0.666667	-0.485427	0.730304	1
5360	chr1:8135420-8136210	1	0	0	0	0	0	0.166667	0.333333	0	-0.415037	1	1
5361	chr1:8139743-8139972	0	0	0	1	1	0	0.333333	0	0.666667	0.736966	0.5	1
5364	chr1:8148676-8148975	0	1	0	1	1	1	0.666667	0.333333	1	0.584963	0.625	1
5367	chr1:8165986-8166208	1	1	0	3	2	1	1.33333	0.666667	2	0.847997	0.289063	1
5369	chr1:8172135-8172358	0	0	0	1	0	0	0.166667	0	0.333333	0.415037	1	1
5373	chr1:8184823-8185323	0	0	0	1	0	0	0.166667	0	0.333333	0.415037	1	1
5375	chr1:8188683-8188905	0	1	0	2	1	0	0.666667	0.333333	1	0.584963	0.625	1
5391	chr1:8211131-8211345	1	1	0	0	1	1	0.666667	0.666667	0.666667	0	1	1
5400	chr1:8220559-8220777	1	0	0	1	0	0	0.333333	0.333333	0.333333	0	1	1
5407	chr1:8247519-8247738	1	0	0	0	0	0	0.166667	0.333333	0	-0.415037	1	1
5408	chr1:8247739-8247977	1	1	1	3	1	1	1.33333	1	1.66667	0.415037	0.726563	1
5410	chr1:8250438-8250657	0	1	0	0	1	0	0.333333	0.333333	0.333333	0	1	1
5418	chr1:8270813-8271042	0	1	1	1	1	0	0.666667	0.666667	0.666667	0	1	1
5427	chr1:8285622-8285955	0	1	0	1	1	0	0.5	0.333333	0.666667	0.321928	1	1
5436	chr1:8305351-8305891	1	0	0	0	0	0	0.166667	0.333333	0	-0.415037	1	1
5440	chr1:8309218-8309604	1	0	0	1	1	0	0.5	0.333333	0.666667	0.321928	1	1
5443	chr1:8313276-8313500	1	1	0	4	1	1	1.33333	0.666667	2	0.847997	0.344547	1
5445	chr1:8315157-8316077	0	0	0	1	0	0	0.166667	0	0.333333	0.415037	1	1
5447	chr1:8316957-8317228	0	1	0	0	1	0	0.333333	0.333333	0.333333	0	1	1
5451	chr1:8321872-8322037	0	0	0	1	0	0	0.166667	0	0.333333	0.415037	1	1
5463	chr1:8351557-8351775	0	2	0	3	1	1	1.16667	0.666667	1.66667	0.678072	0.484103	1
5465	chr1:8352822-8353294	0	1	0	1	0	0	0.333333	0.333333	0.333333	0	1	1
5475	chr1:8387794-8388015	0	0	0	1	1	0	0.333333	0	0.666667	0.736966	0.5	1
5482	chr1:8392665-8392885	0	1	0	2	0	1	0.666667	0.333333	1	0.584963	0.625	1
5490	chr1:8401696-8402191	0	0	0	1	1	0	0.333333	0	0.666667	0.736966	0.5	1
5506	chr1:8427587-8428458	0	0	0	1	1	0	0.333333	0	0.666667	0.736966	0.5	1
5509	chr1:8429943-8430161	0	0	0	0	1	0	0.166667	0	0.333333	0.415037	1	1
5519	chr1:8448473-8448693	5	3	5	0	0	0	2.16667	4.33333	0	-2.41504	0.000244141	0.0512232
5520	chr1:8455080-8455459	4	1	1	3	0	0	1.5	2	1	-0.584963	0.646515	1
5522	chr1:8461354-8461426	0	0	0	0	1	0	0.166667	0	0.333333	0.415037	1	1
5527	chr1:8463052-8463272	0	1	0	0	0	0	0.166667	0.333333	0	-0.415037	1	1
5535	chr1:8486070-8486438	4	2	2	0	0	0	1.33333	2.66667	0	-1.87447	0.0078125	0.500208
5539	chr1:8496082-8496303	0	0	0	3	0	1	0.666667	0	1.33333	1.22239	0.250526	1
5541	chr1:8499833-8500058	1	0	0	3	1	0	0.833333	0.333333	1.33333	0.807355	0.491203	1
5543	chr1:8508717-8508813	1	1	0	13	11	7	5.5	0.666667	10.3333	2.76553	1.30851e-07	0.00014276
5545	chr1:8513516-8513790	0	0	0	2	0	0	0.333333	0	0.666667	0.736966	0.666667	1
5552	chr1:8540293-8540807	0	0	0	1	0	0	0.166667	0	0.333333	0.415037	1	1
5559	chr1:8558453-8558680	8	2	2	1	0	0	2.16667	4	0.333333	-1.90689	0.0722105	1
5564	chr1:8572186-8572403	0	1	0	0	0	0	0.166667	0.333333	0	-0.415037	1	1
5578	chr1:8605836-8606424	0	0	0	1	0	0	0.166667	0	0.333333	0.415037	1	1
5608	chr1:8746359-8746733	0	0	0	1	1	0	0.333333	0	0.666667	0.736966	0.5	1
5620	chr1:8773501-8773717	0	0	0	1	0	0	0.166667	0	0.333333	0.415037	1	1
5627	chr1:8787646-8787779	0	0	0	0	1	1	0.333333	0	0.666667	0.736966	0.5	1
5637	chr1:8807927-8808154	0	0	0	1	0	0	0.166667	0	0.333333	0.415037	1	1
5643	chr1:8820178-8820402	1	1	1	0	1	0	0.666667	1	0.333333	-0.584963	0.625	1
5655	chr1:8845774-8845998	0	0	0	1	0	0	0.166667	0	0.333333	0.415037	1	1
5661	chr1:8858844-8859083	0	1	0	0	0	0	0.166667	0.333333	0	-0.415037	1	1
5668	chr1:8868895-8869121	0	1	0	3	2	1	1.16667	0.333333	2	1.16993	0.125	1
5671	chr1:8870158-8870370	0	0	0	2	0	0	0.333333	0	0.666667	0.736966	0.666667	1
5681	chr1:8883588-8883879	0	1	1	2	1	1	1	0.666667	1.33333	0.485427	0.6875	1
5685	chr1:8885443-8885772	0	1	0	1	1	0	0.5	0.333333	0.666667	0.321928	1	1
5687	chr1:8889955-8890473	0	1	0	0	0	0	0.166667	0.333333	0	-0.415037	1	1
5689	chr1:8890616-8891000	15	3	4	7	1	1	5.16667	7.33333	3	-1.05889	0.357629	1
5703	chr1:8909834-8910053	0	1	0	1	1	1	0.666667	0.333333	1	0.584963	0.625	1
5704	chr1:8913340-8913582	1	0	0	0	0	0	0.166667	0.333333	0	-0.415037	1	1
5712	chr1:8936656-8936781	27	15	11	8	8	5	12.3333	17.6667	7	-1.22239	0.0308596	1
5721	chr1:8941146-8941368	0	0	0	0	1	0	0.166667	0	0.333333	0.415037	1	1
5726	chr1:8943248-8943465	0	0	0	1	1	0	0.333333	0	0.666667	0.736966	0.5	1
5735	chr1:8955543-8955747	4	4	3	1	0	0	2	3.66667	0.333333	-1.80735	0.00634766	0.464999
5739	chr1:8961405-8961794	1	0	0	0	0	0	0.166667	0.333333	0	-0.415037	1	1
5740	chr1:8963289-8963507	0	0	0	0	0	1	0.166667	0	0.333333	0.415037	1	1
5763	chr1:9000821-9001142	0	0	0	1	0	1	0.333333	0	0.666667	0.736966	0.5	1
5774	chr1:9024400-9024630	1	1	1	6	1	2	2	1	3	1	0.273577	1
5777	chr1:9025652-9025870	1	1	1	3	2	1	1.5	1	2	0.584963	0.507813	1
5779	chr1:9029852-9030189	1	1	0	3	2	0	1.16667	0.666667	1.66667	0.678072	0.484103	1
5783	chr1:9032442-9032666	3	3	1	3	1	1	2	2.33333	1.66667	-0.321928	0.774414	1
5787	chr1:9042532-9043093	0	0	0	1	0	0	0.166667	0	0.333333	0.415037	1	1
5791	chr1:9047375-9047599	8	10	2	24	7	4	9.16667	6.66667	11.6667	0.724366	0.49069	1
5802	chr1:9067891-9068834	0	0	0	1	0	0	0.166667	0	0.333333	0.415037	1	1
5809	chr1:9076929-9077303	1	0	0	1	0	0	0.333333	0.333333	0.333333	0	1	1
5816	chr1:9084008-9084281	2	1	1	3	1	0	1.33333	1.33333	1.33333	0	1	1
5818	chr1:9087047-9087406	0	0	0	2	0	0	0.333333	0	0.666667	0.736966	0.666667	1
5821	chr1:9096492-9096824	0	0	0	0	1	1	0.333333	0	0.666667	0.736966	0.5	1
5828	chr1:9105544-9105853	2	0	0	3	1	1	1.16667	0.666667	1.66667	0.678072	0.484103	1
5830	chr1:9113645-9113857	5	4	4	1	1	1	2.66667	4.33333	1	-1.41504	0.0212708	0.866721
5832	chr1:9115277-9115500	1	0	0	3	1	1	1	0.333333	1.66667	1	0.21875	1
5837	chr1:9123848-9124261	0	0	0	1	0	0	0.166667	0	0.333333	0.415037	1	1
5838	chr1:9124648-9125036	9	5	2	1	1	0	3	5.33333	0.666667	-1.926	0.0228596	0.894126
5850	chr1:9136942-9137160	1	1	2	0	1	1	1	1.33333	0.666667	-0.485427	0.6875	1
5854	chr1:9147357-9147577	2	1	2	1	0	0	1	1.66667	0.333333	-1	0.21875	1
5858	chr1:9159577-9159606	0	0	0	1	0	0	0.166667	0	0.333333	0.415037	1	1
5861	chr1:9167543-9167911	0	0	0	1	0	0	0.166667	0	0.333333	0.415037	1	1
5876	chr1:9191387-9192262	0	0	0	2	0	0	0.333333	0	0.666667	0.736966	0.666667	1
5884	chr1:9218691-9218970	1	0	0	2	0	0	0.5	0.333333	0.666667	0.321928	1	1
5913	chr1:9266945-9267160	1	1	0	1	0	0	0.5	0.666667	0.333333	-0.321928	1	1
5923	chr1:9278536-9278977	0	0	0	1	1	1	0.5	0	1	1	0.25	1
5948	chr1:9326973-9327946	0	0	0	1	0	0	0.166667	0	0.333333	0.415037	1	1
5957	chr1:9351338-9351649	1	1	0	1	0	0	0.5	0.666667	0.333333	-0.321928	1	1
6028	chr1:9437905-9438120	1	1	1	4	1	1	1.5	1	2	0.584963	0.507813	1
6029	chr1:9439984-9440181	28	6	6	3	1	1	7.5	13.3333	1.66667	-2.42626	0.0822751	1
6038	chr1:9456014-9456235	0	0	0	1	0	0	0.166667	0	0.333333	0.415037	1	1
6044	chr1:9468766-9469089	2	1	2	1	1	0	1.16667	1.66667	0.666667	-0.678072	0.453125	1
6055	chr1:9480191-9480425	1	0	0	13	1	2	2.83333	0.333333	5.33333	2.24793	0.174617	1
6056	chr1:9480426-9480899	1	0	0	2	0	0	0.5	0.333333	0.666667	0.321928	1	1
6066	chr1:9487787-9487927	3	2	2	3	3	3	2.66667	2.33333	3	0.263034	0.803619	1
6069	chr1:9488207-9488871	0	0	0	1	0	0	0.166667	0	0.333333	0.415037	1	1
6072	chr1:9503581-9503802	2	1	1	0	0	0	0.666667	1.33333	0	-1.22239	0.125	1
6084	chr1:9525365-9525571	1	0	0	0	0	0	0.166667	0.333333	0	-0.415037	1	1
6095	chr1:9548234-9548450	2	2	0	4	1	2	1.83333	1.33333	2.33333	0.514573	0.548828	1
6098	chr1:9552547-9552631	12	8	9	14	14	12	11.5	9.66667	13.3333	0.426265	0.2284	1
6100	chr1:9552808-9553026	1	1	0	1	0	0	0.5	0.666667	0.333333	-0.321928	1	1
6111	chr1:9562131-9562244	0	0	0	1	1	0	0.333333	0	0.666667	0.736966	0.5	1
6118	chr1:9566367-9566960	1	0	0	2	1	0	0.666667	0.333333	1	0.584963	0.625	1
6124	chr1:9573554-9574069	1	0	0	1	0	0	0.333333	0.333333	0.333333	0	1	1
6128	chr1:9576926-9577246	0	0	0	0	1	0	0.166667	0	0.333333	0.415037	1	1
6134	chr1:9583726-9583987	1	0	0	0	1	1	0.5	0.333333	0.666667	0.321928	1	1
6151	chr1:9602964-9603339	4	3	1	1	2	0	1.83333	2.66667	1	-0.874469	0.226563	1
6153	chr1:9604420-9604693	0	1	0	0	0	0	0.166667	0.333333	0	-0.415037	1	1
6164	chr1:9628586-9628833	1	0	0	3	1	1	1	0.333333	1.66667	1	0.21875	1
6174	chr1:9637110-9637413	0	0	1	1	0	0	0.333333	0.333333	0.333333	0	1	1
6215	chr1:9682967-9683189	0	0	0	2	0	0	0.333333	0	0.666667	0.736966	0.666667	1
6216	chr1:9683268-9683542	0	1	0	6	2	2	1.83333	0.333333	3.33333	1.70044	0.0396952	1
6230	chr1:9699881-9700241	0	1	0	1	0	1	0.5	0.333333	0.666667	0.321928	1	1
6234	chr1:9702264-9702485	0	0	0	2	1	0	0.5	0	1	1	0.25	1
6237	chr1:9709012-9709084	2	3	3	2	8	4	3.66667	2.66667	4.66667	0.628031	0.353718	1
6249	chr1:9721086-9721615	1	0	0	0	1	0	0.333333	0.333333	0.333333	0	1	1
6251	chr1:9724200-9724450	0	0	0	2	1	0	0.5	0	1	1	0.25	1
6253	chr1:9726856-9727233	0	0	0	1	0	0	0.166667	0	0.333333	0.415037	1	1
6255	chr1:9727528-9727771	0	0	0	2	0	0	0.333333	0	0.666667	0.736966	0.666667	1
6267	chr1:9739976-9740109	0	0	1	0	1	0	0.333333	0.333333	0.333333	0	1	1
6284	chr1:9753376-9753606	1	0	0	1	0	0	0.333333	0.333333	0.333333	0	1	1
6288	chr1:9770937-9771411	1	1	0	0	0	0	0.333333	0.666667	0	-0.736966	0.5	1
6301	chr1:9801114-9801894	1	0	0	0	0	0	0.166667	0.333333	0	-0.415037	1	1
6303	chr1:9802696-9802890	0	0	0	1	0	0	0.166667	0	0.333333	0.415037	1	1
6306	chr1:9804905-9804965	0	0	0	0	0	1	0.166667	0	0.333333	0.415037	1	1
6307	chr1:9805182-9805211	0	0	0	0	1	0	0.166667	0	0.333333	0.415037	1	1
6311	chr1:9810814-9811047	0	0	1	1	1	0	0.5	0.333333	0.666667	0.321928	1	1
6314	chr1:9818145-9818802	0	0	0	1	0	0	0.166667	0	0.333333	0.415037	1	1
6318	chr1:9820740-9821255	0	0	0	2	0	1	0.5	0	1	1	0.25	1
6324	chr1:9829802-9830012	0	0	0	5	3	2	1.66667	0	3.33333	2.11548	0.00195313	0.214519
6335	chr1:9841595-9841813	0	0	1	1	0	0	0.333333	0.333333	0.333333	0	1	1
6343	chr1:9847853-9848850	0	1	0	1	0	0	0.333333	0.333333	0.333333	0	1	1
6350	chr1:9864128-9864345	0	0	0	1	1	0	0.333333	0	0.666667	0.736966	0.5	1
6358	chr1:9880288-9880501	0	0	0	1	1	0	0.333333	0	0.666667	0.736966	0.5	1
6375	chr1:9889954-9890361	1	0	0	2	1	0	0.666667	0.333333	1	0.584963	0.625	1
6376	chr1:9892973-9893060	1	0	0	0	0	0	0.166667	0.333333	0	-0.415037	1	1
6380	chr1:9898107-9898316	0	0	0	1	0	0	0.166667	0	0.333333	0.415037	1	1
6385	chr1:9911522-9911743	1	0	1	1	0	0	0.5	0.666667	0.333333	-0.321928	1	1
6411	chr1:9947976-9948184	0	0	0	1	0	0	0.166667	0	0.333333	0.415037	1	1
6417	chr1:9956770-9956949	0	1	0	0	1	1	0.5	0.333333	0.666667	0.321928	1	1
6419	chr1:9959216-9959741	1	0	0	0	0	0	0.166667	0.333333	0	-0.415037	1	1
6422	chr1:9965574-9965876	1	1	0	1	1	1	0.833333	0.666667	1	0.263034	1	1
6424	chr1:9968525-9968832	0	0	0	1	0	0	0.166667	0	0.333333	0.415037	1	1
6430	chr1:9971581-9971800	1	1	0	10	3	2	2.83333	0.666667	5	1.848	0.0897119	1
6431	chr1:9971801-9972019	2	2	3	1	0	1	1.5	2.33333	0.666667	-1	0.179688	1
6440	chr1:9986045-9986250	0	1	0	0	0	0	0.166667	0.333333	0	-0.415037	1	1
6448	chr1:10010242-10010732	5	3	2	9	1	2	3.66667	3.33333	4	0.206451	0.902782	1
6454	chr1:10017472-10017664	1	1	1	0	0	0	0.5	1	0	-1	0.25	1
6469	chr1:10037058-10037282	1	0	0	0	0	0	0.166667	0.333333	0	-0.415037	1	1
6470	chr1:10037631-10038338	0	0	0	0	1	0	0.166667	0	0.333333	0.415037	1	1
6475	chr1:10044199-10044610	0	0	0	1	0	0	0.166667	0	0.333333	0.415037	1	1
6479	chr1:10051337-10052040	0	1	0	1	0	0	0.333333	0.333333	0.333333	0	1	1
6493	chr1:10061980-10062050	0	1	1	2	4	10	3	0.666667	5.33333	1.926	0.0525224	1
6495	chr1:10063907-10064401	0	0	0	1	0	0	0.166667	0	0.333333	0.415037	1	1
6496	chr1:10066413-10066676	2	2	1	16	5	4	5	1.66667	8.33333	1.80735	0.080101	1
6498	chr1:10067749-10068032	2	1	0	2	0	0	0.833333	1	0.666667	-0.263034	1	1
6501	chr1:10070736-10071194	1	0	0	0	0	0	0.166667	0.333333	0	-0.415037	1	1
6508	chr1:10080535-10080785	1	1	0	3	1	1	1.16667	0.666667	1.66667	0.678072	0.453125	1
6515	chr1:10083235-10083454	2	1	0	3	0	1	1.16667	1	1.33333	0.222392	1	1
6517	chr1:10084073-10084293	1	3	1	3	1	2	1.83333	1.66667	2	0.169925	1	1
6527	chr1:10092039-10092390	0	0	0	2	0	0	0.333333	0	0.666667	0.736966	0.666667	1
6533	chr1:10095150-10095371	1	0	0	10	1	0	2	0.333333	3.66667	1.80735	0.334025	1
6538	chr1:10097179-10097396	0	0	0	0	1	0	0.166667	0	0.333333	0.415037	1	1
6539	chr1:10097926-10098262	0	0	0	1	0	0	0.166667	0	0.333333	0.415037	1	1
6550	chr1:10124915-10125093	1	0	1	1	0	0	0.5	0.666667	0.333333	-0.321928	1	1
6551	chr1:10126615-10126888	9	4	6	5	2	1	4.5	6.33333	2.66667	-1	0.0743213	1
6554	chr1:10128501-10128857	0	0	0	2	1	0	0.5	0	1	1	0.25	1
6564	chr1:10148527-10148955	1	1	0	0	0	0	0.333333	0.666667	0	-0.736966	0.5	1
6585	chr1:10199116-10199373	0	0	0	1	0	0	0.166667	0	0.333333	0.415037	1	1
6603	chr1:10223431-10223650	0	0	0	1	1	0	0.333333	0	0.666667	0.736966	0.5	1
6605	chr1:10226548-10226907	0	0	0	1	0	0	0.166667	0	0.333333	0.415037	1	1
6612	chr1:10244165-10244552	1	1	0	0	0	0	0.333333	0.666667	0	-0.736966	0.5	1
6616	chr1:10251791-10252178	0	0	0	1	0	0	0.166667	0	0.333333	0.415037	1	1
6619	chr1:10252980-10253334	1	1	0	1	0	0	0.5	0.666667	0.333333	-0.321928	1	1
6620	chr1:10253335-10253924	1	0	0	1	1	0	0.5	0.333333	0.666667	0.321928	1	1
6628	chr1:10265208-10265448	2	1	1	2	1	0	1.16667	1.33333	1	-0.222392	1	1
6633	chr1:10268508-10268882	0	0	0	1	0	0	0.166667	0	0.333333	0.415037	1	1
6639	chr1:10274441-10274971	0	0	0	1	0	0	0.166667	0	0.333333	0.415037	1	1
6641	chr1:10278572-10278795	0	1	1	2	3	1	1.33333	0.666667	2	0.847997	0.289063	1
6657	chr1:10315100-10315338	0	0	0	2	0	0	0.333333	0	0.666667	0.736966	0.666667	1
6670	chr1:10378130-10378701	1	1	0	1	0	0	0.5	0.666667	0.333333	-0.321928	1	1
6678	chr1:10392963-10393185	0	1	1	2	0	0	0.666667	0.666667	0.666667	0	1	1
6679	chr1:10393186-10393352	0	1	0	0	0	0	0.166667	0.333333	0	-0.415037	1	1
6684	chr1:10396300-10396793	0	0	0	1	0	0	0.166667	0	0.333333	0.415037	1	1
6717	chr1:10453565-10453769	0	0	0	0	1	0	0.166667	0	0.333333	0.415037	1	1
6719	chr1:10456426-10456496	1	7	4	5	3	8	4.66667	4	5.33333	0.341037	0.660263	1
6720	chr1:10457688-10458200	1	0	0	1	1	0	0.5	0.333333	0.666667	0.321928	1	1
6732	chr1:10474525-10474808	3	1	1	1	0	0	1	1.66667	0.333333	-1	0.21875	1
6734	chr1:10477860-10478097	0	0	0	1	1	0	0.333333	0	0.666667	0.736966	0.5	1
6738	chr1:10488662-10488879	1	0	0	0	0	0	0.166667	0.333333	0	-0.415037	1	1
6741	chr1:10491594-10491835	0	0	0	3	0	0	0.5	0	1	1	0.55	1
6764	chr1:10526722-10526934	0	0	0	0	1	0	0.166667	0	0.333333	0.415037	1	1
6784	chr1:10542584-10542804	2	1	1	1	0	0	0.833333	1.33333	0.333333	-0.807355	0.375	1
6786	chr1:10551831-10552148	0	0	0	2	0	0	0.333333	0	0.666667	0.736966	0.666667	1
6788	chr1:10559599-10560104	1	0	0	1	0	0	0.333333	0.333333	0.333333	0	1	1
6790	chr1:10560725-10560959	26	10	8	3	2	0	8.16667	14.6667	1.66667	-2.55459	0.0111979	0.640547
6813	chr1:10611841-10612074	0	0	0	1	0	0	0.166667	0	0.333333	0.415037	1	1
6825	chr1:10660177-10660402	0	0	0	1	0	0	0.166667	0	0.333333	0.415037	1	1
6834	chr1:10681497-10681988	0	0	0	2	0	0	0.333333	0	0.666667	0.736966	0.666667	1
6879	chr1:10705291-10705511	0	0	0	1	0	0	0.166667	0	0.333333	0.415037	1	1
6997	chr1:10817550-10817769	0	0	0	2	1	1	0.666667	0	1.33333	1.22239	0.125	1
7023	chr1:10843282-10843853	1	0	0	0	0	0	0.166667	0.333333	0	-0.415037	1	1
7052	chr1:10862003-10862213	1	1	1	1	1	0	0.833333	1	0.666667	-0.263034	1	1
7058	chr1:10878181-10878772	0	0	0	1	1	0	0.333333	0	0.666667	0.736966	0.5	1
7068	chr1:10886267-10886490	0	1	0	2	1	0	0.666667	0.333333	1	0.584963	0.625	1
7070	chr1:10886696-10886782	1	1	1	2	1	1	1.16667	1	1.33333	0.222392	1	1
7085	chr1:10908777-10908991	3	3	1	6	2	1	2.66667	2.33333	3	0.263034	0.843392	1
7107	chr1:10940902-10941588	0	0	0	1	0	0	0.166667	0	0.333333	0.415037	1	1
7110	chr1:10943298-10943923	0	0	0	1	1	0	0.333333	0	0.666667	0.736966	0.5	1
7123	chr1:10951715-10951952	0	1	0	3	2	1	1.16667	0.333333	2	1.16993	0.125	1
7148	chr1:10981402-10982385	1	0	0	0	0	0	0.166667	0.333333	0	-0.415037	1	1
7150	chr1:10989380-10989912	0	0	0	1	1	0	0.333333	0	0.666667	0.736966	0.5	1
7158	chr1:10992784-10993306	0	0	0	1	0	0	0.166667	0	0.333333	0.415037	1	1
7159	chr1:10996277-10996579	0	1	0	6	3	3	2.16667	0.333333	4	1.90689	0.00341797	0.314246
7184	chr1:11034861-11035387	0	0	0	1	0	0	0.166667	0	0.333333	0.415037	1	1
7200	chr1:11058769-11059182	0	0	0	1	0	0	0.166667	0	0.333333	0.415037	1	1
7216	chr1:11075565-11075651	18	17	17	14	7	8	13.5	17.3333	9.66667	-0.78136	0.0139995	0.710181
7221	chr1:11078033-11078559	0	0	0	0	1	0	0.166667	0	0.333333	0.415037	1	1
7223	chr1:11079717-11080296	0	0	0	1	0	0	0.166667	0	0.333333	0.415037	1	1
7227	chr1:11089143-11089370	1	0	0	0	0	0	0.166667	0.333333	0	-0.415037	1	1
7228	chr1:11091104-11091510	0	0	0	1	0	0	0.166667	0	0.333333	0.415037	1	1
7233	chr1:11093027-11093914	0	0	0	1	0	0	0.166667	0	0.333333	0.415037	1	1
7235	chr1:11096259-11096485	0	1	0	2	1	1	0.833333	0.333333	1.33333	0.807355	0.375	1
7242	chr1:11109767-11109988	0	0	0	1	0	0	0.166667	0	0.333333	0.415037	1	1
7263	chr1:11121178-11121440	18	10	9	28	8	5	13	12.3333	13.6667	0.137504	0.89938	1
7273	chr1:11141625-11142063	0	0	0	1	0	0	0.166667	0	0.333333	0.415037	1	1
7278	chr1:11154751-11154970	1	0	0	0	0	0	0.166667	0.333333	0	-0.415037	1	1
7279	chr1:11155445-11155695	0	0	0	1	0	0	0.166667	0	0.333333	0.415037	1	1
7282	chr1:11156134-11156204	0	1	1	2	1	1	1	0.666667	1.33333	0.485427	0.6875	1
7287	chr1:11161012-11161619	1	0	0	0	0	0	0.166667	0.333333	0	-0.415037	1	1
7303	chr1:11195593-11195814	0	0	0	3	0	0	0.5	0	1	1	0.55	1
7310	chr1:11205527-11205878	0	0	0	0	1	0	0.166667	0	0.333333	0.415037	1	1
7319	chr1:11245338-11246064	0	1	0	0	0	0	0.166667	0.333333	0	-0.415037	1	1
7329	chr1:11277551-11277814	0	0	0	1	0	0	0.166667	0	0.333333	0.415037	1	1
7338	chr1:11301082-11301302	0	0	0	1	0	0	0.166667	0	0.333333	0.415037	1	1
7351	chr1:11323218-11323467	1	1	1	6	4	3	2.66667	1	4.33333	1.41504	0.0212708	0.866721
7354	chr1:11328103-11328657	0	0	0	1	0	0	0.166667	0	0.333333	0.415037	1	1
7356	chr1:11330402-11331240	0	0	0	1	0	0	0.166667	0	0.333333	0.415037	1	1
7358	chr1:11332331-11332544	0	0	0	3	2	1	1	0	2	1.58496	0.03125	1
7367	chr1:11351283-11351588	3	1	0	2	1	0	1.16667	1.33333	1	-0.222392	1	1
7373	chr1:11363175-11363713	0	0	0	1	0	0	0.166667	0	0.333333	0.415037	1	1
7375	chr1:11364499-11364894	0	0	0	2	0	1	0.5	0	1	1	0.25	1
7388	chr1:11390191-11390987	0	0	0	1	0	0	0.166667	0	0.333333	0.415037	1	1
7401	chr1:11413689-11413910	7	5	4	9	5	3	5.5	5.33333	5.66667	0.0740006	1	1
7404	chr1:11414284-11414873	1	0	0	0	0	0	0.166667	0.333333	0	-0.415037	1	1
7407	chr1:11418424-11418704	0	0	1	1	0	0	0.333333	0.333333	0.333333	0	1	1
7417	chr1:11432498-11432589	3	2	0	10	11	6	5.33333	1.66667	9	1.90689	0.000113074	0.0312582
7421	chr1:11436364-11436631	1	1	1	6	2	2	2.16667	1	3.33333	1.11548	0.128853	1
7422	chr1:11438911-11439119	0	1	1	6	2	2	2	0.666667	3.33333	1.37851	0.0807153	1
7424	chr1:11441394-11441921	0	0	0	0	1	0	0.166667	0	0.333333	0.415037	1	1
7427	chr1:11446548-11447071	2	0	0	3	1	0	1	0.666667	1.33333	0.485427	0.772797	1
7429	chr1:11453094-11453309	0	0	0	1	1	1	0.5	0	1	1	0.25	1
7435	chr1:11459098-11459277	1	2	1	3	2	2	1.83333	1.33333	2.33333	0.514573	0.548828	1
7439	chr1:11463126-11463320	0	1	0	1	1	1	0.666667	0.333333	1	0.584963	0.625	1
7445	chr1:11477777-11477997	3	3	1	15	5	2	4.83333	2.33333	7.33333	1.32193	0.233571	1
7447	chr1:11481562-11482072	0	0	0	0	1	0	0.166667	0	0.333333	0.415037	1	1
7451	chr1:11483555-11483778	0	0	0	1	0	0	0.166667	0	0.333333	0.415037	1	1
7454	chr1:11491152-11491370	0	0	0	6	1	1	1.33333	0	2.66667	1.87447	0.116508	1
7467	chr1:11520137-11520353	2	2	1	11	4	2	3.66667	1.66667	5.66667	1.32193	0.172194	1
7485	chr1:11569874-11570080	0	0	0	0	1	1	0.333333	0	0.666667	0.736966	0.5	1
7499	chr1:11592848-11592927	0	1	0	0	0	0	0.166667	0.333333	0	-0.415037	1	1
7509	chr1:11609783-11609999	0	1	0	1	0	0	0.333333	0.333333	0.333333	0	1	1
7514	chr1:11622421-11622636	0	1	0	26	8	6	6.83333	0.333333	13.3333	3.42626	0.00838076	0.530366
7518	chr1:11628666-11628888	1	1	0	9	3	2	2.66667	0.666667	4.66667	1.76553	0.0765969	1
7524	chr1:11636809-11636914	4	4	2	11	14	3	6.33333	3.33333	9.33333	1.25376	0.0831512	1
7534	chr1:11656198-11656426	1	1	2	3	3	0	1.66667	1.33333	2	0.36257	0.753906	1
7537	chr1:11665541-11665659	9	6	4	26	20	7	12	6.33333	17.6667	1.34792	0.0496964	1
7547	chr1:11678099-11678654	1	0	0	0	1	0	0.333333	0.333333	0.333333	0	1	1
7554	chr1:11683618-11683862	1	2	2	0	1	1	1.16667	1.66667	0.666667	-0.678072	0.453125	1
7556	chr1:11687075-11687161	0	1	0	2	0	1	0.666667	0.333333	1	0.584963	0.625	1
7565	chr1:11702768-11702990	0	4	0	0	4	0	1.33333	1.33333	1.33333	0	1	1
7567	chr1:11704776-11704868	3	3	1	17	9	6	6.5	2.33333	10.6667	1.80735	0.0111587	0.639852
7590	chr1:11725711-11725973	0	1	0	0	0	0	0.166667	0.333333	0	-0.415037	1	1
7611	chr1:11743729-11743952	1	1	1	4	2	1	1.66667	1	2.33333	0.736966	0.34375	1
7637	chr1:11770678-11770903	0	0	0	1	0	0	0.166667	0	0.333333	0.415037	1	1
7643	chr1:11776891-11777264	0	0	0	1	1	0	0.333333	0	0.666667	0.736966	0.5	1
7664	chr1:11816371-11816584	1	1	1	1	1	0	0.833333	1	0.666667	-0.263034	1	1
7666	chr1:11818091-11818317	0	0	0	0	1	0	0.166667	0	0.333333	0.415037	1	1
7669	chr1:11819680-11820494	1	0	0	0	0	0	0.166667	0.333333	0	-0.415037	1	1
7691	chr1:11845883-11846815	1	1	0	0	1	0	0.5	0.666667	0.333333	-0.321928	1	1
7726	chr1:11915303-11915517	0	2	1	6	4	3	2.66667	1	4.33333	1.41504	0.0212708	0.866721
7735	chr1:11925388-11925606	7	10	10	47	17	15	17.6667	9	26.3333	1.45066	0.089467	1
7737	chr1:11926008-11926370	2	1	1	1	1	0	1	1.33333	0.666667	-0.485427	0.6875	1
7757	chr1:11955832-11956038	0	0	0	0	1	0	0.166667	0	0.333333	0.415037	1	1
7776	chr1:11984025-11984188	0	0	1	9	8	9	4.5	0.333333	8.66667	2.85798	4.17233e-07	0.000341786
7784	chr1:11993635-11993846	1	0	0	2	1	0	0.666667	0.333333	1	0.584963	0.625	1
7798	chr1:12003447-12003668	0	0	0	0	1	0	0.166667	0	0.333333	0.415037	1	1
7800	chr1:12009570-12009809	1	0	0	0	0	0	0.166667	0.333333	0	-0.415037	1	1
7822	chr1:12036825-12037043	0	0	0	0	1	0	0.166667	0	0.333333	0.415037	1	1
7827	chr1:12041266-12041484	2	2	1	12	2	1	3.33333	1.66667	5	1.16993	0.400897	1
7829	chr1:12051214-12051905	0	0	1	2	0	0	0.5	0.333333	0.666667	0.321928	1	1
7832	chr1:12058034-12058252	0	0	0	1	0	0	0.166667	0	0.333333	0.415037	1	1
7835	chr1:12059726-12060078	1	0	0	1	0	0	0.333333	0.333333	0.333333	0	1	1
7840	chr1:12073956-12074169	1	0	0	1	2	1	0.833333	0.333333	1.33333	0.807355	0.375	1
7844	chr1:12077561-12077961	0	1	0	1	0	0	0.333333	0.333333	0.333333	0	1	1
7848	chr1:12080834-12081156	1	0	0	3	1	0	0.833333	0.333333	1.33333	0.807355	0.491203	1
7851	chr1:12083759-12083975	1	1	1	1	0	0	0.666667	1	0.333333	-0.584963	0.625	1
7870	chr1:12103893-12104177	0	0	0	1	1	0	0.333333	0	0.666667	0.736966	0.5	1
7875	chr1:12108984-12109201	0	0	0	0	1	1	0.333333	0	0.666667	0.736966	0.5	1
7876	chr1:12109220-12109647	3	2	1	1	0	0	1.16667	2	0.333333	-1.16993	0.125	1
7891	chr1:12136251-12136798	0	0	0	2	0	0	0.333333	0	0.666667	0.736966	0.666667	1
7899	chr1:12145261-12145480	0	0	0	1	1	0	0.333333	0	0.666667	0.736966	0.5	1
7903	chr1:12155438-12155666	0	0	0	1	1	0	0.333333	0	0.666667	0.736966	0.5	1
7904	chr1:12160637-12160938	0	0	0	1	0	0	0.166667	0	0.333333	0.415037	1	1
7910	chr1:12176537-12176781	1	0	0	1	0	0	0.333333	0.333333	0.333333	0	1	1
7913	chr1:12177233-12177868	1	0	0	0	0	0	0.166667	0.333333	0	-0.415037	1	1
7915	chr1:12179015-12179487	1	1	1	4	1	0	1.33333	1	1.66667	0.415037	0.7871	1
7919	chr1:12182979-12183275	0	0	0	6	1	1	1.33333	0	2.66667	1.87447	0.116508	1
7927	chr1:12191944-12192155	1	2	0	2	0	0	0.833333	1	0.666667	-0.263034	1	1
7963	chr1:12256063-12256282	1	0	0	4	1	0	1	0.333333	1.66667	1	0.43436	1
7967	chr1:12258841-12259608	1	0	0	0	0	0	0.166667	0.333333	0	-0.415037	1	1
7976	chr1:12278152-12278237	0	0	0	1	1	0	0.333333	0	0.666667	0.736966	0.5	1
7978	chr1:12279226-12279716	1	0	0	1	0	0	0.333333	0.333333	0.333333	0	1	1
7983	chr1:12288943-12289355	0	0	0	1	0	0	0.166667	0	0.333333	0.415037	1	1
7990	chr1:12293811-12294029	0	0	1	1	1	0	0.5	0.333333	0.666667	0.321928	1	1
7994	chr1:12306845-12307398	1	0	0	1	0	0	0.333333	0.333333	0.333333	0	1	1
8000	chr1:12315096-12315313	0	1	0	0	0	0	0.166667	0.333333	0	-0.415037	1	1
8002	chr1:12328112-12328326	0	0	0	1	0	0	0.166667	0	0.333333	0.415037	1	1
8005	chr1:12350484-12350704	0	1	0	1	1	0	0.5	0.333333	0.666667	0.321928	1	1
8010	chr1:12366134-12366578	1	0	0	0	0	0	0.166667	0.333333	0	-0.415037	1	1
8018	chr1:12407321-12407534	1	0	0	6	1	2	1.66667	0.333333	3	1.58496	0.11576	1
8026	chr1:12439916-12440181	0	0	0	3	1	1	0.833333	0	1.66667	1.41504	0.0625	1
8038	chr1:12525795-12526114	0	1	0	0	0	0	0.166667	0.333333	0	-0.415037	1	1
8061	chr1:12581892-12582123	1	2	1	4	1	1	1.66667	1.33333	2	0.36257	0.753906	1
8062	chr1:12582683-12582917	0	0	0	1	0	0	0.166667	0	0.333333	0.415037	1	1
8069	chr1:12591044-12591303	0	0	0	1	0	1	0.333333	0	0.666667	0.736966	0.5	1
8110	chr1:12657183-12657482	0	0	0	3	0	0	0.5	0	1	1	0.55	1
8113	chr1:12664891-12665006	0	0	0	0	1	0	0.166667	0	0.333333	0.415037	1	1
8116	chr1:12666588-12666816	0	0	0	1	0	0	0.166667	0	0.333333	0.415037	1	1
8130	chr1:12685035-12685253	0	0	0	1	0	0	0.166667	0	0.333333	0.415037	1	1
8132	chr1:12688925-12689141	7	5	3	3	1	1	3.33333	5	1.66667	-1.16993	0.0413895	1
8134	chr1:12694617-12695213	1	0	0	3	0	0	0.666667	0.333333	1	0.584963	0.775401	1
8146	chr1:12720748-12720955	1	0	0	2	1	1	0.833333	0.333333	1.33333	0.807355	0.375	1
8155	chr1:12773884-12774344	1	0	0	0	0	0	0.166667	0.333333	0	-0.415037	1	1
8166	chr1:12800601-12801234	0	0	0	1	0	0	0.166667	0	0.333333	0.415037	1	1
8181	chr1:12890542-12890772	0	1	0	1	1	0	0.5	0.333333	0.666667	0.321928	1	1
8183	chr1:12897899-12898223	0	0	0	1	0	0	0.166667	0	0.333333	0.415037	1	1
8187	chr1:12910704-12910986	1	0	0	1	1	0	0.5	0.333333	0.666667	0.321928	1	1
8190	chr1:12914285-12914432	1	0	0	0	0	0	0.166667	0.333333	0	-0.415037	1	1
8192	chr1:12936548-12936935	0	0	0	1	0	0	0.166667	0	0.333333	0.415037	1	1
8195	chr1:12945155-12945530	0	0	0	1	0	1	0.333333	0	0.666667	0.736966	0.5	1
8226	chr1:13049908-13050296	0	0	0	1	0	0	0.166667	0	0.333333	0.415037	1	1
8244	chr1:13138903-13138988	0	0	0	0	0	1	0.166667	0	0.333333	0.415037	1	1
8254	chr1:13187782-13188234	1	0	0	1	0	0	0.333333	0.333333	0.333333	0	1	1
8257	chr1:13189662-13189809	0	1	0	0	0	1	0.333333	0.333333	0.333333	0	1	1
8370	chr1:13702816-13703031	0	0	0	1	0	0	0.166667	0	0.333333	0.415037	1	1
8373	chr1:13706613-13706924	0	1	0	3	1	1	1	0.333333	1.66667	1	0.21875	1
8396	chr1:13743538-13743984	1	0	0	0	0	0	0.166667	0.333333	0	-0.415037	1	1
8415	chr1:13773548-13773770	1	0	0	2	0	0	0.5	0.333333	0.666667	0.321928	1	1
8417	chr1:13777237-13777579	0	0	0	3	0	0	0.5	0	1	1	0.55	1
8420	chr1:13784362-13784868	0	0	0	2	0	0	0.333333	0	0.666667	0.736966	0.666667	1
8425	chr1:13799161-13799452	0	0	0	3	1	1	0.833333	0	1.66667	1.41504	0.0625	1
8430	chr1:13811434-13811655	1	1	0	2	2	1	1.16667	0.666667	1.66667	0.678072	0.453125	1
8433	chr1:13812486-13812811	0	1	1	3	1	1	1.16667	0.666667	1.66667	0.678072	0.453125	1
8438	chr1:13825898-13826631	2	1	0	2	1	0	1	1	1	0	1	1
8458	chr1:13853889-13854112	0	0	0	1	0	0	0.166667	0	0.333333	0.415037	1	1
8460	chr1:13855728-13856104	1	0	0	1	0	0	0.333333	0.333333	0.333333	0	1	1
8464	chr1:13857153-13857576	0	0	0	0	0	1	0.166667	0	0.333333	0.415037	1	1
8472	chr1:13874324-13874542	0	0	0	3	1	0	0.666667	0	1.33333	1.22239	0.250526	1
8477	chr1:13880541-13880763	3	1	0	10	2	3	3.16667	1.33333	5	1.36257	0.200818	1
8484	chr1:13895006-13895223	1	0	0	0	0	0	0.166667	0.333333	0	-0.415037	1	1
8494	chr1:13917530-13917769	0	0	0	3	1	0	0.666667	0	1.33333	1.22239	0.250526	1
8500	chr1:13951860-13952079	0	1	0	1	0	0	0.333333	0.333333	0.333333	0	1	1
8502	chr1:13952253-13952474	0	1	0	1	0	0	0.333333	0.333333	0.333333	0	1	1
8510	chr1:13963223-13963603	0	1	0	1	0	0	0.333333	0.333333	0.333333	0	1	1
8514	chr1:13991804-13992013	1	3	1	25	10	11	8.5	1.66667	15.3333	2.61471	0.00166261	0.198027
8524	chr1:14021167-14021387	0	0	0	1	0	0	0.166667	0	0.333333	0.415037	1	1
8526	chr1:14025232-14025795	0	0	0	1	0	0	0.166667	0	0.333333	0.415037	1	1
8532	chr1:14037269-14037504	0	0	0	1	0	0	0.166667	0	0.333333	0.415037	1	1
8538	chr1:14051793-14052138	3	1	1	0	0	0	0.833333	1.66667	0	-1.41504	0.0625	1
8545	chr1:14082433-14082682	1	0	1	0	0	0	0.333333	0.666667	0	-0.736966	0.5	1
8580	chr1:14165272-14165496	1	0	0	2	1	0	0.666667	0.333333	1	0.584963	0.625	1
8587	chr1:14201926-14202307	0	0	0	1	0	0	0.166667	0	0.333333	0.415037	1	1
8614	chr1:14259691-14259911	1	0	0	1	1	1	0.666667	0.333333	1	0.584963	0.625	1
8620	chr1:14284776-14284993	0	0	0	0	1	0	0.166667	0	0.333333	0.415037	1	1
8633	chr1:14327371-14327668	0	0	0	0	1	0	0.166667	0	0.333333	0.415037	1	1
8638	chr1:14378064-14378259	0	0	0	3	1	0	0.666667	0	1.33333	1.22239	0.250526	1
8644	chr1:14402450-14402700	1	0	0	0	0	0	0.166667	0.333333	0	-0.415037	1	1
8652	chr1:14453301-14453525	0	0	0	2	0	0	0.333333	0	0.666667	0.736966	0.666667	1
8663	chr1:14566049-14566372	0	0	1	0	1	0	0.333333	0.333333	0.333333	0	1	1
8667	chr1:14584804-14585082	0	0	0	2	0	0	0.333333	0	0.666667	0.736966	0.666667	1
8670	chr1:14598971-14599277	0	1	0	3	0	0	0.666667	0.333333	1	0.584963	0.775401	1
8672	chr1:14606562-14606790	1	3	0	3	2	1	1.66667	1.33333	2	0.36257	0.753906	1
8679	chr1:14667476-14667660	0	0	0	0	1	0	0.166667	0	0.333333	0.415037	1	1
8680	chr1:14669337-14669560	0	0	0	1	0	0	0.166667	0	0.333333	0.415037	1	1
8684	chr1:14677759-14677978	1	1	1	4	1	0	1.33333	1	1.66667	0.415037	0.7871	1
8695	chr1:14702030-14702308	1	0	1	0	0	0	0.333333	0.666667	0	-0.736966	0.5	1
8699	chr1:14722380-14722588	0	0	0	0	1	0	0.166667	0	0.333333	0.415037	1	1
8701	chr1:14744188-14744416	3	1	1	6	1	1	2.16667	1.66667	2.66667	0.459432	0.71693	1
8709	chr1:14759824-14760280	1	0	0	2	0	0	0.5	0.333333	0.666667	0.321928	1	1
8711	chr1:14762447-14762649	0	0	0	0	1	0	0.166667	0	0.333333	0.415037	1	1
8714	chr1:14771615-14771835	0	1	0	1	0	0	0.333333	0.333333	0.333333	0	1	1
8716	chr1:14779545-14779844	1	0	0	1	0	0	0.333333	0.333333	0.333333	0	1	1
8717	chr1:14783247-14783500	0	0	1	1	1	1	0.666667	0.333333	1	0.584963	0.625	1
8736	chr1:14890459-14890592	0	1	0	0	0	0	0.166667	0.333333	0	-0.415037	1	1
8737	chr1:14899764-14899866	6	6	1	7	8	4	5.33333	4.33333	6.33333	0.459432	0.417947	1
8743	chr1:14921081-14921564	0	0	0	1	1	0	0.333333	0	0.666667	0.736966	0.5	1
8753	chr1:14936797-14937035	0	1	0	1	1	1	0.666667	0.333333	1	0.584963	0.625	1
8756	chr1:14941565-14942046	1	1	1	2	1	0	1	1	1	0	1	1
8762	chr1:14955436-14955648	1	1	1	1	1	1	1	1	1	0	1	1
8763	chr1:14968631-14968820	1	0	0	1	1	0	0.5	0.333333	0.666667	0.321928	1	1
8798	chr1:15061649-15062335	0	0	0	0	1	0	0.166667	0	0.333333	0.415037	1	1
8810	chr1:15095944-15096210	0	1	0	0	1	1	0.5	0.333333	0.666667	0.321928	1	1
8811	chr1:15097887-15098246	0	1	0	1	0	0	0.333333	0.333333	0.333333	0	1	1
8814	chr1:15103590-15103817	9	6	5	2	0	0	3.66667	6.66667	0.666667	-2.20163	0.000121117	0.0316388
8835	chr1:15140816-15141402	1	0	0	0	1	1	0.5	0.333333	0.666667	0.321928	1	1
8838	chr1:15167481-15167826	2	1	0	6	1	0	1.66667	1	2.33333	0.736966	0.62361	1
8848	chr1:15190693-15190982	1	1	0	2	1	1	1	0.666667	1.33333	0.485427	0.6875	1
8854	chr1:15201502-15201751	4	2	0	3	1	1	1.83333	2	1.66667	-0.169925	1	1
8856	chr1:15210336-15210812	0	0	0	1	0	0	0.166667	0	0.333333	0.415037	1	1
8867	chr1:15222644-15222864	1	2	2	6	3	2	2.66667	1.66667	3.66667	0.807355	0.210114	1
8871	chr1:15228815-15229039	0	1	0	1	1	0	0.5	0.333333	0.666667	0.321928	1	1
8875	chr1:15242759-15242981	0	1	0	1	0	0	0.333333	0.333333	0.333333	0	1	1
8876	chr1:15249034-15249212	1	0	0	0	0	0	0.166667	0.333333	0	-0.415037	1	1
8891	chr1:15260437-15260664	0	0	0	1	0	0	0.166667	0	0.333333	0.415037	1	1
8892	chr1:15264729-15264962	0	1	0	0	2	0	0.5	0.333333	0.666667	0.321928	1	1
8898	chr1:15267505-15267941	1	0	0	0	1	1	0.5	0.333333	0.666667	0.321928	1	1
8899	chr1:15270099-15270494	0	0	0	2	1	1	0.666667	0	1.33333	1.22239	0.125	1
8904	chr1:15272927-15273063	1	1	0	1	1	0	0.666667	0.666667	0.666667	0	1	1
8915	chr1:15298271-15298299	3	3	2	5	4	8	4.16667	2.66667	5.66667	0.862496	0.107752	1
8923	chr1:15309874-15310362	0	0	0	1	1	0	0.333333	0	0.666667	0.736966	0.5	1
8962	chr1:15367877-15368455	0	1	1	3	2	1	1.33333	0.666667	2	0.847997	0.289063	1
8963	chr1:15372501-15372718	1	2	1	6	1	1	2	1.33333	2.66667	0.652077	0.563849	1
8969	chr1:15385222-15385442	2	2	1	6	4	1	2.66667	1.66667	3.66667	0.807355	0.26277	1
8975	chr1:15395999-15396047	0	1	0	1	1	2	0.833333	0.333333	1.33333	0.807355	0.375	1
9004	chr1:15458725-15459212	0	1	0	1	1	0	0.5	0.333333	0.666667	0.321928	1	1
9006	chr1:15465155-15465550	0	0	0	1	1	0	0.333333	0	0.666667	0.736966	0.5	1
9022	chr1:15517377-15517903	0	0	0	3	1	0	0.666667	0	1.33333	1.22239	0.250526	1
9024	chr1:15519044-15519260	0	0	0	3	1	0	0.666667	0	1.33333	1.22239	0.250526	1
9028	chr1:15525006-15525807	1	1	0	0	0	0	0.333333	0.666667	0	-0.736966	0.5	1
9039	chr1:15555192-15555415	1	1	0	0	1	0	0.5	0.666667	0.333333	-0.321928	1	1
9041	chr1:15555742-15555979	0	1	0	9	3	1	2.33333	0.333333	4.33333	2	0.0947312	1
9049	chr1:15567984-15568653	0	0	0	0	1	0	0.166667	0	0.333333	0.415037	1	1
9058	chr1:15585175-15585262	0	0	0	0	1	0	0.166667	0	0.333333	0.415037	1	1
9059	chr1:15597239-15597559	0	0	0	1	1	1	0.5	0	1	1	0.25	1
9064	chr1:15601552-15601799	1	0	0	0	1	0	0.333333	0.333333	0.333333	0	1	1
9065	chr1:15602965-15603222	0	0	0	1	0	0	0.166667	0	0.333333	0.415037	1	1
9073	chr1:15620983-15621121	0	0	0	0	1	0	0.166667	0	0.333333	0.415037	1	1
9075	chr1:15627419-15627637	0	0	0	0	0	1	0.166667	0	0.333333	0.415037	1	1
9081	chr1:15634320-15634717	0	0	0	2	0	0	0.333333	0	0.666667	0.736966	0.666667	1
9086	chr1:15642075-15642381	0	0	0	2	1	0	0.5	0	1	1	0.25	1
9087	chr1:15643380-15643611	1	0	0	3	1	0	0.833333	0.333333	1.33333	0.807355	0.491203	1
9098	chr1:15666415-15666621	0	0	0	1	2	1	0.666667	0	1.33333	1.22239	0.125	1
9106	chr1:15674039-15674288	9	7	3	4	1	1	4.16667	6.33333	2	-1.28951	0.043719	1
9113	chr1:15686201-15686370	0	1	0	0	0	0	0.166667	0.333333	0	-0.415037	1	1
9119	chr1:15693518-15693916	2	0	0	3	1	0	1	0.666667	1.33333	0.485427	0.772797	1
9122	chr1:15694561-15694664	0	0	0	0	0	1	0.166667	0	0.333333	0.415037	1	1
9123	chr1:15699708-15699932	0	0	0	0	1	0	0.166667	0	0.333333	0.415037	1	1
9125	chr1:15704446-15704705	0	1	1	4	1	1	1.33333	0.666667	2	0.847997	0.344547	1
9157	chr1:15751560-15751945	0	0	0	4	1	1	1	0	2	1.58496	0.0746606	1
9166	chr1:15761152-15761511	1	1	1	2	0	0	0.833333	1	0.666667	-0.263034	1	1
9186	chr1:15797169-15797388	1	0	0	0	0	0	0.166667	0.333333	0	-0.415037	1	1
9192	chr1:15816462-15816677	0	0	0	0	1	0	0.166667	0	0.333333	0.415037	1	1
9218	chr1:15863439-15863660	1	1	0	0	0	0	0.333333	0.666667	0	-0.736966	0.5	1
9230	chr1:15882823-15883073	0	0	0	1	0	0	0.166667	0	0.333333	0.415037	1	1
9234	chr1:15898948-15899417	1	0	0	0	0	0	0.166667	0.333333	0	-0.415037	1	1
9238	chr1:15903338-15903558	0	1	0	1	1	1	0.666667	0.333333	1	0.584963	0.625	1
9256	chr1:15927797-15928014	1	1	1	5	4	5	2.83333	1	4.66667	1.5025	0.0127258	0.665902
9258	chr1:15929112-15929420	4	4	2	12	4	4	5	3.33333	6.66667	0.823122	0.273936	1
9262	chr1:15939085-15939301	0	0	0	1	0	0	0.166667	0	0.333333	0.415037	1	1
9268	chr1:15946050-15946328	0	0	0	1	0	0	0.166667	0	0.333333	0.415037	1	1
9272	chr1:15956320-15956530	0	0	0	0	1	0	0.166667	0	0.333333	0.415037	1	1
9274	chr1:15957432-15957650	3	4	3	7	2	1	3.33333	3.33333	3.33333	0	1	1
9277	chr1:15963956-15964177	0	1	0	1	0	0	0.333333	0.333333	0.333333	0	1	1
9278	chr1:15968937-15969486	0	0	0	1	0	0	0.166667	0	0.333333	0.415037	1	1
9284	chr1:15974161-15974383	0	0	0	1	0	0	0.166667	0	0.333333	0.415037	1	1
9294	chr1:15996762-15997123	0	0	0	0	1	0	0.166667	0	0.333333	0.415037	1	1
9299	chr1:16001629-16001852	0	0	0	2	1	1	0.666667	0	1.33333	1.22239	0.125	1
9324	chr1:16048732-16048952	0	0	0	0	0	1	0.166667	0	0.333333	0.415037	1	1
9393	chr1:16097835-16098208	1	0	0	1	0	0	0.333333	0.333333	0.333333	0	1	1
9394	chr1:16099614-16099802	1	0	1	2	0	0	0.666667	0.666667	0.666667	0	1	1
9401	chr1:16108307-16108528	0	0	0	1	0	0	0.166667	0	0.333333	0.415037	1	1
9403	chr1:16109387-16109797	0	0	0	1	0	0	0.166667	0	0.333333	0.415037	1	1
9410	chr1:16111529-16112054	0	0	0	1	1	0	0.333333	0	0.666667	0.736966	0.5	1
9417	chr1:16123659-16123882	2	0	0	3	1	1	1.16667	0.666667	1.66667	0.678072	0.484103	1
9423	chr1:16138361-16138643	0	1	0	1	0	0	0.333333	0.333333	0.333333	0	1	1
9428	chr1:16144365-16144579	0	0	0	3	0	0	0.5	0	1	1	0.55	1
9437	chr1:16152775-16153531	0	0	0	1	0	0	0.166667	0	0.333333	0.415037	1	1
9438	chr1:16153952-16154145	0	0	0	1	0	1	0.333333	0	0.666667	0.736966	0.5	1
9449	chr1:16163068-16163404	3	2	2	9	2	2	3.33333	2.33333	4.33333	0.678072	0.484121	1
9457	chr1:16170046-16170256	0	0	0	0	0	1	0.166667	0	0.333333	0.415037	1	1
9459	chr1:16171146-16171368	0	0	0	3	1	1	0.833333	0	1.66667	1.41504	0.0625	1
9460	chr1:16172055-16172265	0	0	0	0	1	0	0.166667	0	0.333333	0.415037	1	1
9468	chr1:16183945-16184323	1	0	0	2	1	0	0.666667	0.333333	1	0.584963	0.625	1
9469	chr1:16185138-16185295	0	1	0	4	3	3	1.83333	0.333333	3.33333	1.70044	0.0117188	0.640547
9474	chr1:16187720-16187963	0	0	0	2	1	0	0.5	0	1	1	0.25	1
9488	chr1:16213869-16214101	0	0	0	1	1	1	0.5	0	1	1	0.25	1
9490	chr1:16216302-16216592	1	0	0	0	1	0	0.333333	0.333333	0.333333	0	1	1
9494	chr1:16221511-16221723	0	0	0	1	1	0	0.333333	0	0.666667	0.736966	0.5	1
9498	chr1:16232161-16232372	1	0	0	0	1	1	0.5	0.333333	0.666667	0.321928	1	1
9510	chr1:16264692-16265013	0	0	0	3	1	1	0.833333	0	1.66667	1.41504	0.0625	1
9539	chr1:16307061-16307304	6	0	0	3	1	1	1.83333	2	1.66667	-0.169925	1	1
9550	chr1:16326144-16326361	0	0	0	1	1	0	0.333333	0	0.666667	0.736966	0.5	1
9608	chr1:16413339-16413563	0	0	0	1	0	0	0.166667	0	0.333333	0.415037	1	1
9622	chr1:16425249-16425471	0	1	0	3	2	1	1.16667	0.333333	2	1.16993	0.125	1
9643	chr1:16474460-16474686	0	1	0	4	1	1	1.16667	0.333333	2	1.16993	0.199803	1
9661	chr1:16487368-16487943	3	1	1	0	0	0	0.833333	1.66667	0	-1.41504	0.0625	1
9673	chr1:16497410-16497486	1	1	0	0	1	0	0.5	0.666667	0.333333	-0.321928	1	1
9680	chr1:16504790-16505051	0	1	0	6	2	2	1.83333	0.333333	3.33333	1.70044	0.0396952	1
9685	chr1:16509306-16509559	0	0	0	6	1	0	1.16667	0	2.33333	1.73697	0.24568	1
9706	chr1:16542034-16542275	0	0	0	3	0	0	0.5	0	1	1	0.55	1
9719	chr1:16561316-16561532	0	1	0	1	1	0	0.5	0.333333	0.666667	0.321928	1	1
9734	chr1:16604554-16604775	0	0	0	2	1	0	0.5	0	1	1	0.25	1
9739	chr1:16610086-16610301	0	0	0	1	0	0	0.166667	0	0.333333	0.415037	1	1
9740	chr1:16611035-16611387	1	0	0	0	0	0	0.166667	0.333333	0	-0.415037	1	1
9744	chr1:16615160-16615377	1	1	1	0	0	0	0.5	1	0	-1	0.25	1
9746	chr1:16622769-16623069	2	1	1	0	1	0	0.833333	1.33333	0.333333	-0.807355	0.375	1
9748	chr1:16623951-16624286	0	0	0	1	0	0	0.166667	0	0.333333	0.415037	1	1
9750	chr1:16624421-16624645	2	2	3	1	0	0	1.33333	2.33333	0.333333	-1.32193	0.0703125	1
9767	chr1:16663163-16663404	0	0	0	1	0	0	0.166667	0	0.333333	0.415037	1	1
9771	chr1:16672859-16673107	2	2	1	0	1	0	1	1.66667	0.333333	-1	0.21875	1
9773	chr1:16674795-16675120	3	2	2	4	1	0	2	2.33333	1.66667	-0.321928	0.791252	1
9789	chr1:16690731-16690961	1	0	0	3	2	0	1	0.333333	1.66667	1	0.288983	1
9796	chr1:16698050-16698262	0	0	0	0	1	0	0.166667	0	0.333333	0.415037	1	1
9798	chr1:16701466-16701685	4	3	2	2	1	1	2.16667	3	1.33333	-0.777608	0.266846	1
9812	chr1:16726615-16726863	0	0	0	1	1	0	0.333333	0	0.666667	0.736966	0.5	1
9818	chr1:16732708-16732792	1	2	1	1	3	1	1.5	1.33333	1.66667	0.192645	1	1
9822	chr1:16740654-16740889	0	1	0	0	0	0	0.166667	0.333333	0	-0.415037	1	1
9827	chr1:16746287-16746936	0	0	0	2	0	0	0.333333	0	0.666667	0.736966	0.666667	1
9831	chr1:16765698-16766003	0	1	1	0	0	0	0.333333	0.666667	0	-0.736966	0.5	1
9846	chr1:16836475-16836695	0	1	0	0	1	1	0.5	0.333333	0.666667	0.321928	1	1
9849	chr1:16839280-16839610	0	0	0	1	0	0	0.166667	0	0.333333	0.415037	1	1
9850	chr1:16845073-16845295	0	0	0	3	1	0	0.666667	0	1.33333	1.22239	0.250526	1
9871	chr1:16912625-16912803	8	10	6	2	3	1	5	8	2	-1.58496	0.00143091	0.180409
9902	chr1:17000910-17001132	0	0	0	1	0	0	0.166667	0	0.333333	0.415037	1	1
9929	chr1:17034908-17035122	8	5	8	26	14	20	13.5	7	20	1.39232	0.000313801	0.062627
9937	chr1:17050923-17051016	0	0	1	0	1	0	0.333333	0.333333	0.333333	0	1	1
9981	chr1:17207350-17207576	0	0	0	0	1	0	0.166667	0	0.333333	0.415037	1	1
9989	chr1:17218041-17218261	2	4	5	0	1	1	2.16667	3.66667	0.666667	-1.48543	0.0224609	0.884451
9991	chr1:17226552-17226771	0	0	0	2	0	0	0.333333	0	0.666667	0.736966	0.666667	1
9992	chr1:17226811-17227014	0	0	0	5	1	1	1.16667	0	2.33333	1.73697	0.099575	1
9995	chr1:17230607-17231084	3	1	1	4	1	2	2	1.66667	2.33333	0.321928	0.774414	1
9997	chr1:17237306-17237577	0	0	0	3	0	1	0.666667	0	1.33333	1.22239	0.250526	1
10005	chr1:17255002-17255222	0	0	0	0	0	1	0.166667	0	0.333333	0.415037	1	1
10062	chr1:17343165-17343810	0	0	0	0	1	0	0.166667	0	0.333333	0.415037	1	1
10073	chr1:17358787-17359232	0	0	0	1	0	0	0.166667	0	0.333333	0.415037	1	1
10085	chr1:17381423-17381644	1	1	0	3	1	1	1.16667	0.666667	1.66667	0.678072	0.453125	1
10089	chr1:17384338-17384646	1	0	0	3	1	0	0.833333	0.333333	1.33333	0.807355	0.491203	1
10093	chr1:17402803-17403013	2	0	0	2	0	0	0.666667	0.666667	0.666667	0	1	1
10110	chr1:17433031-17433482	8	2	2	4	1	1	3	4	2	-0.736966	0.460749	1
10122	chr1:17453264-17453486	0	0	0	1	1	1	0.5	0	1	1	0.25	1
10128	chr1:17472679-17472923	0	1	0	2	1	0	0.666667	0.333333	1	0.584963	0.625	1
10137	chr1:17510915-17511237	0	0	0	0	1	0	0.166667	0	0.333333	0.415037	1	1
10184	chr1:17582809-17583451	1	1	0	0	1	0	0.5	0.666667	0.333333	-0.321928	1	1
10201	chr1:17627832-17627960	0	1	0	3	2	0	1	0.333333	1.66667	1	0.288983	1
10206	chr1:17636880-17637044	9	12	9	45	37	25	22.8333	10	35.6667	1.73697	6.18763e-06	0.00308725
10234	chr1:17684129-17684350	0	0	0	3	0	0	0.5	0	1	1	0.55	1
10240	chr1:17700080-17700565	0	0	0	0	1	0	0.166667	0	0.333333	0.415037	1	1
10241	chr1:17711058-17711158	1	2	1	12	9	3	4.66667	1.33333	8	1.94753	0.0107016	0.631448
10255	chr1:17748225-17748445	2	1	2	2	0	0	1.16667	1.66667	0.666667	-0.678072	0.453125	1
10261	chr1:17756534-17757208	1	1	0	0	0	0	0.333333	0.666667	0	-0.736966	0.5	1
10264	chr1:17759167-17759378	2	2	2	5	2	0	2.16667	2	2.33333	0.152003	1	1
10270	chr1:17762154-17762338	0	1	1	1	1	1	0.833333	0.666667	1	0.263034	1	1
10286	chr1:17771681-17771898	0	1	0	1	1	0	0.5	0.333333	0.666667	0.321928	1	1
10296	chr1:17783407-17783620	0	1	0	1	0	0	0.333333	0.333333	0.333333	0	1	1
10299	chr1:17784848-17785096	1	0	0	1	0	0	0.333333	0.333333	0.333333	0	1	1
10302	chr1:17788634-17788959	1	0	0	1	0	0	0.333333	0.333333	0.333333	0	1	1
10304	chr1:17793621-17793835	0	0	0	1	0	0	0.166667	0	0.333333	0.415037	1	1
10307	chr1:17795583-17795879	1	0	0	6	0	1	1.33333	0.333333	2.33333	1.32193	0.382044	1
10312	chr1:17801373-17801597	0	1	0	3	1	0	0.833333	0.333333	1.33333	0.807355	0.491203	1
10316	chr1:17805739-17806056	0	0	0	1	1	1	0.5	0	1	1	0.25	1
10325	chr1:17811550-17811915	1	0	0	3	0	0	0.666667	0.333333	1	0.584963	0.775401	1
10327	chr1:17816470-17817452	1	0	0	0	0	0	0.166667	0.333333	0	-0.415037	1	1
10328	chr1:17818571-17818831	2	2	1	3	1	2	1.83333	1.66667	2	0.169925	1	1
10336	chr1:17839073-17839449	0	0	0	0	0	1	0.166667	0	0.333333	0.415037	1	1
10353	chr1:17867966-17868386	0	0	0	3	0	0	0.5	0	1	1	0.55	1
10357	chr1:17878987-17879519	0	0	0	2	1	1	0.666667	0	1.33333	1.22239	0.125	1
10385	chr1:17924690-17924847	0	0	0	0	0	1	0.166667	0	0.333333	0.415037	1	1
10386	chr1:17927172-17927469	0	1	0	6	2	1	1.66667	0.333333	3	1.58496	0.11576	1
10394	chr1:17932882-17933109	0	0	0	1	0	1	0.333333	0	0.666667	0.736966	0.5	1
10419	chr1:17976287-17977152	0	0	0	1	0	0	0.166667	0	0.333333	0.415037	1	1
10424	chr1:17989900-17989972	0	1	0	0	1	0	0.333333	0.333333	0.333333	0	1	1
10439	chr1:18007372-18007657	0	0	0	2	0	0	0.333333	0	0.666667	0.736966	0.666667	1
10468	chr1:18043399-18043636	0	1	0	3	1	1	1	0.333333	1.66667	1	0.21875	1
10496	chr1:18127183-18127403	1	4	1	19	7	4	6	2	10	1.87447	0.0798077	1
10510	chr1:18181469-18181692	0	1	0	3	1	0	0.833333	0.333333	1.33333	0.807355	0.491203	1
10512	chr1:18184074-18184423	0	0	0	4	1	0	0.833333	0	1.66667	1.41504	0.251121	1
10523	chr1:18221039-18221368	1	1	1	4	1	1	1.5	1	2	0.584963	0.507813	1
10528	chr1:18238092-18238162	1	6	5	5	16	30	10.5	4	17	1.848	0.0670094	1
10532	chr1:18249150-18249599	0	0	0	3	0	0	0.5	0	1	1	0.55	1
10540	chr1:18264171-18264573	0	1	0	2	0	0	0.5	0.333333	0.666667	0.321928	1	1
10542	chr1:18265675-18265811	1	1	0	0	1	1	0.666667	0.666667	0.666667	0	1	1
10560	chr1:18338770-18339533	1	0	0	1	0	0	0.333333	0.333333	0.333333	0	1	1
10570	chr1:18366473-18366689	0	0	0	2	0	0	0.333333	0	0.666667	0.736966	0.666667	1
10572	chr1:18368979-18369279	0	0	0	1	1	0	0.333333	0	0.666667	0.736966	0.5	1
10586	chr1:18389145-18389755	0	0	0	1	0	0	0.166667	0	0.333333	0.415037	1	1
10589	chr1:18398154-18398379	2	1	0	1	2	1	1.16667	1	1.33333	0.222392	1	1
10606	chr1:18454081-18454327	2	1	0	4	1	2	1.66667	1	2.33333	0.736966	0.34375	1
10620	chr1:18499485-18499706	0	0	0	1	1	0	0.333333	0	0.666667	0.736966	0.5	1
10627	chr1:18534969-18535209	0	0	0	1	0	0	0.166667	0	0.333333	0.415037	1	1
10637	chr1:18541330-18541546	1	0	0	1	2	1	0.833333	0.333333	1.33333	0.807355	0.375	1
10650	chr1:18613064-18613599	1	0	0	0	0	0	0.166667	0.333333	0	-0.415037	1	1
10689	chr1:18764555-18764775	0	0	0	0	1	0	0.166667	0	0.333333	0.415037	1	1
10702	chr1:18798467-18798813	1	0	1	3	0	1	1	0.666667	1.33333	0.485427	0.730304	1
10703	chr1:18800484-18800745	1	2	1	1	2	1	1.33333	1.33333	1.33333	0	1	1
10713	chr1:18820584-18820795	1	2	0	3	2	2	1.66667	1	2.33333	0.736966	0.34375	1
10718	chr1:18837127-18837351	0	1	0	0	0	0	0.166667	0.333333	0	-0.415037	1	1
10745	chr1:18911486-18911874	1	1	0	1	1	0	0.666667	0.666667	0.666667	0	1	1
10751	chr1:18922130-18922221	2	1	1	6	4	1	2.5	1.33333	3.66667	1	0.176344	1
10753	chr1:18922620-18923414	0	1	0	3	0	0	0.666667	0.333333	1	0.584963	0.775401	1
10757	chr1:18927009-18927228	0	1	0	3	1	0	0.833333	0.333333	1.33333	0.807355	0.491203	1
10811	chr1:19014929-19015332	0	1	0	3	1	0	0.833333	0.333333	1.33333	0.807355	0.491203	1
10817	chr1:19026148-19026364	1	0	0	3	1	1	1	0.333333	1.66667	1	0.21875	1
10818	chr1:19028066-19028757	0	0	0	1	0	0	0.166667	0	0.333333	0.415037	1	1
10839	chr1:19062658-19062883	0	1	1	4	1	2	1.5	0.666667	2.33333	1	0.179688	1
10848	chr1:19098250-19098472	1	1	1	2	1	1	1.16667	1	1.33333	0.222392	1	1
10854	chr1:19108585-19108725	0	0	0	1	1	1	0.5	0	1	1	0.25	1
10858	chr1:19117069-19117365	2	1	1	3	1	1	1.5	1.33333	1.66667	0.192645	1	1
10915	chr1:19218085-19218446	3	2	0	3	1	0	1.5	1.66667	1.33333	-0.192645	1	1
10928	chr1:19242311-19242543	1	1	0	6	3	2	2.16667	0.666667	3.66667	1.48543	0.0275995	1
10964	chr1:19297907-19298146	1	0	0	4	2	2	1.5	0.333333	2.66667	1.45943	0.0390625	1
10974	chr1:19327483-19327697	0	0	0	1	0	0	0.166667	0	0.333333	0.415037	1	1
10978	chr1:19335276-19335521	0	1	0	4	3	0	1.33333	0.333333	2.33333	1.32193	0.170281	1
10981	chr1:19342860-19343081	0	1	0	0	0	1	0.333333	0.333333	0.333333	0	1	1
10983	chr1:19348658-19349171	1	0	0	0	0	0	0.166667	0.333333	0	-0.415037	1	1
10996	chr1:19377992-19378217	1	0	0	1	0	0	0.333333	0.333333	0.333333	0	1	1
11012	chr1:19417037-19417514	0	0	0	1	0	0	0.166667	0	0.333333	0.415037	1	1
11020	chr1:19495164-19495396	0	0	0	0	1	0	0.166667	0	0.333333	0.415037	1	1
11040	chr1:19571422-19571859	0	0	0	1	0	0	0.166667	0	0.333333	0.415037	1	1
11042	chr1:19574193-19574442	0	0	0	1	0	1	0.333333	0	0.666667	0.736966	0.5	1
11048	chr1:19590571-19590839	1	1	1	2	1	0	1	1	1	0	1	1
11068	chr1:19618331-19618437	1	0	0	10	7	3	3.5	0.333333	6.66667	2.52356	0.000952558	0.135277
11084	chr1:19647300-19647550	0	0	0	1	0	0	0.166667	0	0.333333	0.415037	1	1
11112	chr1:19688824-19689025	0	0	0	4	3	3	1.66667	0	3.33333	2.11548	0.00195313	0.214519
11113	chr1:19692162-19692252	0	0	0	4	3	3	1.66667	0	3.33333	2.11548	0.00195313	0.214519
11115	chr1:19692774-19693106	0	0	0	2	0	0	0.333333	0	0.666667	0.736966	0.666667	1
11126	chr1:19719022-19719209	1	0	0	1	1	0	0.5	0.333333	0.666667	0.321928	1	1
11135	chr1:19748968-19749155	0	0	0	3	1	1	0.833333	0	1.66667	1.41504	0.0625	1
11167	chr1:19812779-19812988	5	4	2	11	6	8	6	3.66667	8.33333	1	0.0288167	1
11169	chr1:19813297-19813991	2	1	0	4	1	0	1.33333	1	1.66667	0.415037	0.809635	1
11172	chr1:19815974-19816198	0	1	0	1	0	0	0.333333	0.333333	0.333333	0	1	1
11173	chr1:19817876-19818507	0	1	0	1	0	0	0.333333	0.333333	0.333333	0	1	1
11178	chr1:19828681-19828897	0	1	0	1	0	0	0.333333	0.333333	0.333333	0	1	1
11181	chr1:19834925-19835159	0	0	0	1	0	0	0.166667	0	0.333333	0.415037	1	1
11203	chr1:19888819-19889070	0	0	0	1	0	0	0.166667	0	0.333333	0.415037	1	1
11210	chr1:19899722-19899941	0	0	0	1	2	0	0.5	0	1	1	0.25	1
11213	chr1:19903217-19903449	0	1	0	5	1	1	1.33333	0.333333	2.33333	1.32193	0.214843	1
11224	chr1:19929343-19929748	4	0	2	0	0	0	1	2	0	-1.58496	0.121212	1
11226	chr1:19930711-19930927	0	0	0	3	0	1	0.666667	0	1.33333	1.22239	0.250526	1
11229	chr1:19937539-19937753	0	0	0	6	5	2	2.16667	0	4.33333	2.41504	0.000244141	0.0512232
11240	chr1:19963085-19963318	1	0	0	0	1	1	0.5	0.333333	0.666667	0.321928	1	1
11257	chr1:19975946-19976326	1	0	0	3	1	0	0.833333	0.333333	1.33333	0.807355	0.491203	1
11259	chr1:19976562-19977230	0	0	0	2	0	0	0.333333	0	0.666667	0.736966	0.666667	1
11270	chr1:19987784-19988003	1	1	1	9	1	1	2.33333	1	3.66667	1.22239	0.38656	1
11278	chr1:19999912-20000115	1	1	0	2	0	1	0.833333	0.666667	1	0.263034	1	1
11313	chr1:20104860-20105070	0	0	0	0	1	0	0.166667	0	0.333333	0.415037	1	1
11324	chr1:20136470-20136750	0	0	0	2	1	0	0.5	0	1	1	0.25	1
11339	chr1:20170642-20170891	0	0	0	1	1	0	0.333333	0	0.666667	0.736966	0.5	1
11341	chr1:20175277-20175497	0	1	0	0	1	0	0.333333	0.333333	0.333333	0	1	1
11345	chr1:20180233-20180678	0	0	0	0	1	0	0.166667	0	0.333333	0.415037	1	1
11352	chr1:20182037-20182249	1	0	0	3	0	1	0.833333	0.333333	1.33333	0.807355	0.491203	1
11353	chr1:20189983-20190267	1	0	0	0	1	0	0.333333	0.333333	0.333333	0	1	1
11356	chr1:20190778-20191001	1	2	1	8	5	4	3.5	1.33333	5.66667	1.51457	0.00719738	0.500208
11362	chr1:20206726-20207031	1	0	0	1	0	0	0.333333	0.333333	0.333333	0	1	1
11364	chr1:20208051-20208271	1	0	0	0	0	0	0.166667	0.333333	0	-0.415037	1	1
11397	chr1:20261317-20262000	0	0	0	0	1	0	0.166667	0	0.333333	0.415037	1	1
11399	chr1:20274753-20274985	0	1	0	2	1	0	0.666667	0.333333	1	0.584963	0.625	1
11405	chr1:20312554-20312852	1	0	0	0	0	0	0.166667	0.333333	0	-0.415037	1	1
11435	chr1:20462073-20462339	0	1	0	1	1	0	0.5	0.333333	0.666667	0.321928	1	1
11465	chr1:20564842-20565126	0	0	0	1	0	0	0.166667	0	0.333333	0.415037	1	1
11486	chr1:20643397-20643573	5	6	3	17	7	5	7.16667	4.66667	9.66667	0.912537	0.218126	1
11495	chr1:20653052-20653254	5	4	0	9	4	4	4.33333	3	5.66667	0.736966	0.301781	1
11514	chr1:20694306-20694557	9	5	5	43	14	8	14	6.33333	21.6667	1.62803	0.151166	1
11519	chr1:20708121-20708411	1	1	0	3	1	2	1.33333	0.666667	2	0.847997	0.289063	1
11534	chr1:20759822-20760048	0	0	0	1	1	0	0.333333	0	0.666667	0.736966	0.5	1
11537	chr1:20760897-20761117	0	1	0	9	3	2	2.5	0.333333	4.66667	2.08746	0.0434649	1
11545	chr1:20797914-20798134	0	1	0	5	1	1	1.33333	0.333333	2.33333	1.32193	0.214843	1
11569	chr1:20833407-20833633	0	0	0	3	1	1	0.833333	0	1.66667	1.41504	0.0625	1
11578	chr1:20844270-20844622	1	0	0	3	0	0	0.666667	0.333333	1	0.584963	0.775401	1
11581	chr1:20851146-20851798	0	0	0	0	1	0	0.166667	0	0.333333	0.415037	1	1
11583	chr1:20855475-20855696	5	4	4	9	2	1	4.16667	4.33333	4	-0.0931094	1	1
11588	chr1:20874416-20874691	0	0	0	2	1	0	0.5	0	1	1	0.25	1
11603	chr1:20891010-20891262	0	1	0	0	0	0	0.166667	0.333333	0	-0.415037	1	1
11622	chr1:20932665-20932752	1	4	0	6	13	0	4	1.66667	6.33333	1.45943	0.262848	1
11626	chr1:20939031-20939360	0	0	0	2	0	1	0.5	0	1	1	0.25	1
11635	chr1:20947161-20947522	1	0	0	2	1	0	0.666667	0.333333	1	0.584963	0.625	1
11660	chr1:20998932-20999641	0	0	0	2	0	0	0.333333	0	0.666667	0.736966	0.666667	1
11667	chr1:21013142-21013369	0	0	0	2	2	0	0.666667	0	1.33333	1.22239	0.125	1
11681	chr1:21027635-21027848	0	0	0	2	1	0	0.5	0	1	1	0.25	1
11683	chr1:21030295-21030348	1	1	2	1	1	3	1.5	1.33333	1.66667	0.192645	1	1
11720	chr1:21066322-21066540	1	1	0	3	2	1	1.33333	0.666667	2	0.847997	0.289063	1
11722	chr1:21078379-21078679	1	0	0	0	0	0	0.166667	0.333333	0	-0.415037	1	1
11724	chr1:21084491-21084563	0	1	0	0	0	1	0.333333	0.333333	0.333333	0	1	1
11728	chr1:21091132-21091292	0	0	0	1	0	0	0.166667	0	0.333333	0.415037	1	1
11738	chr1:21110033-21110187	2	1	0	3	1	2	1.5	1	2	0.584963	0.507813	1
11745	chr1:21118077-21118387	1	0	0	2	1	0	0.666667	0.333333	1	0.584963	0.625	1
11747	chr1:21121885-21122105	0	0	0	0	0	1	0.166667	0	0.333333	0.415037	1	1
11753	chr1:21145994-21146233	1	1	0	6	1	1	1.66667	0.666667	2.66667	1.1375	0.327034	1
11759	chr1:21166081-21166293	1	1	0	3	0	0	0.833333	0.666667	1	0.263034	1	1
11760	chr1:21169657-21169934	1	0	0	0	0	0	0.166667	0.333333	0	-0.415037	1	1
11762	chr1:21171013-21171249	1	0	0	0	0	0	0.166667	0.333333	0	-0.415037	1	1
11767	chr1:21190031-21190248	1	0	0	0	0	0	0.166667	0.333333	0	-0.415037	1	1
11785	chr1:21258084-21258342	5	2	1	4	1	0	2.16667	2.66667	1.66667	-0.459432	0.700665	1
11790	chr1:21293058-21293332	0	0	0	1	0	0	0.166667	0	0.333333	0.415037	1	1
11792	chr1:21306337-21306543	0	0	0	0	1	0	0.166667	0	0.333333	0.415037	1	1
11793	chr1:21312839-21313166	0	0	1	0	0	0	0.166667	0.333333	0	-0.415037	1	1
11800	chr1:21336241-21336459	0	0	0	2	0	0	0.333333	0	0.666667	0.736966	0.666667	1
11802	chr1:21353779-21354309	0	0	0	1	0	0	0.166667	0	0.333333	0.415037	1	1
11810	chr1:21390296-21390566	2	0	0	6	1	1	1.66667	0.666667	2.66667	1.1375	0.355752	1
11811	chr1:21401720-21401986	5	2	2	1	0	0	1.66667	3	0.333333	-1.58496	0.0214844	0.866721
11817	chr1:21435102-21435320	1	0	0	0	1	0	0.333333	0.333333	0.333333	0	1	1
11820	chr1:21440733-21441102	1	0	0	0	0	0	0.166667	0.333333	0	-0.415037	1	1
11842	chr1:21493738-21494175	0	0	0	1	0	0	0.166667	0	0.333333	0.415037	1	1
11848	chr1:21495653-21495865	1	0	0	0	0	0	0.166667	0.333333	0	-0.415037	1	1
11854	chr1:21512255-21512339	0	0	1	0	0	1	0.333333	0.333333	0.333333	0	1	1
11861	chr1:21531793-21531880	0	1	0	0	0	1	0.333333	0.333333	0.333333	0	1	1
11864	chr1:21540560-21540867	0	0	0	1	0	1	0.333333	0	0.666667	0.736966	0.5	1
11871	chr1:21547045-21547213	1	2	1	2	1	2	1.5	1.33333	1.66667	0.192645	1	1
11883	chr1:21557928-21558277	1	0	0	0	0	0	0.166667	0.333333	0	-0.415037	1	1
11885	chr1:21559258-21559334	0	1	1	0	0	0	0.333333	0.666667	0	-0.736966	0.5	1
11888	chr1:21562994-21563066	0	1	0	1	1	2	0.833333	0.333333	1.33333	0.807355	0.375	1
11892	chr1:21577206-21577424	1	1	0	1	0	0	0.5	0.666667	0.333333	-0.321928	1	1
11906	chr1:21607439-21607607	0	1	1	2	2	1	1.16667	0.666667	1.66667	0.678072	0.453125	1
11909	chr1:21608283-21608482	0	0	0	6	3	2	1.83333	0	3.66667	2.22239	0.00212492	0.224934
11949	chr1:21650404-21650625	12	10	12	7	3	1	7.5	11.3333	3.66667	-1.4021	0.000824083	0.124412
11955	chr1:21656822-21657202	1	0	0	6	1	0	1.33333	0.333333	2.33333	1.32193	0.382044	1
11972	chr1:21680907-21681141	1	0	0	1	1	0	0.5	0.333333	0.666667	0.321928	1	1
11981	chr1:21695881-21696104	0	0	0	2	1	0	0.5	0	1	1	0.25	1
11983	chr1:21696847-21697073	3	4	3	2	6	3	3.5	3.33333	3.66667	0.106915	1	1
11990	chr1:21709592-21709844	0	0	0	3	1	0	0.666667	0	1.33333	1.22239	0.250526	1
11995	chr1:21722380-21722643	1	0	1	3	0	0	0.833333	0.666667	1	0.263034	1	1
11999	chr1:21727939-21728246	0	1	0	1	0	0	0.333333	0.333333	0.333333	0	1	1
12001	chr1:21730273-21730676	0	0	0	1	0	0	0.166667	0	0.333333	0.415037	1	1
12012	chr1:21758825-21759044	1	0	0	3	1	0	0.833333	0.333333	1.33333	0.807355	0.491203	1
12021	chr1:21814529-21814751	0	0	1	0	1	0	0.333333	0.333333	0.333333	0	1	1
12038	chr1:21847771-21847964	1	0	0	3	1	1	1	0.333333	1.66667	1	0.21875	1
12045	chr1:21853619-21853935	0	0	0	1	1	0	0.333333	0	0.666667	0.736966	0.5	1
12049	chr1:21871877-21872280	0	1	0	0	0	0	0.166667	0.333333	0	-0.415037	1	1
12057	chr1:21878312-21878530	1	0	0	2	1	0	0.666667	0.333333	1	0.584963	0.625	1
12058	chr1:21878679-21878896	5	2	2	0	0	0	1.5	3	0	-2	0.00390625	0.334344
12061	chr1:21882357-21882812	1	1	0	0	0	0	0.333333	0.666667	0	-0.736966	0.5	1
12063	chr1:21886106-21886322	2	1	0	34	17	10	10.6667	1	20.3333	3.41504	0.00068288	0.109135
12072	chr1:21897189-21898089	0	1	0	0	0	0	0.166667	0.333333	0	-0.415037	1	1
12085	chr1:21907786-21908018	0	0	0	1	1	1	0.5	0	1	1	0.25	1
12107	chr1:21927045-21927302	0	1	0	1	0	0	0.333333	0.333333	0.333333	0	1	1
12176	chr1:22065718-22065936	1	1	0	1	0	0	0.5	0.666667	0.333333	-0.321928	1	1
12178	chr1:22075107-22075328	0	0	0	1	0	0	0.166667	0	0.333333	0.415037	1	1
12180	chr1:22090008-22090856	0	0	0	2	1	0	0.5	0	1	1	0.25	1
12183	chr1:22091671-22092034	0	1	0	2	1	1	0.833333	0.333333	1.33333	0.807355	0.375	1
12185	chr1:22092217-22092788	0	0	0	2	0	0	0.333333	0	0.666667	0.736966	0.666667	1
12191	chr1:22100887-22101104	2	1	1	2	2	0	1.33333	1.33333	1.33333	0	1	1
12195	chr1:22105368-22105586	0	0	0	1	0	0	0.166667	0	0.333333	0.415037	1	1
12197	chr1:22107329-22107547	1	2	1	3	1	1	1.5	1.33333	1.66667	0.192645	1	1
12201	chr1:22110475-22110793	2	1	0	3	1	1	1.33333	1	1.66667	0.415037	0.726563	1
12204	chr1:22114902-22115534	2	1	0	1	1	0	0.833333	1	0.666667	-0.263034	1	1
12212	chr1:22134961-22135326	0	0	0	1	0	0	0.166667	0	0.333333	0.415037	1	1
12213	chr1:22136054-22136371	1	1	0	3	1	0	1	0.666667	1.33333	0.485427	0.730304	1
12217	chr1:22137128-22137324	2	2	1	18	14	9	7.66667	1.66667	13.6667	2.45943	1.61317e-06	0.00109838
12222	chr1:22145544-22145790	0	0	0	1	0	0	0.166667	0	0.333333	0.415037	1	1
12232	chr1:22163867-22164095	0	0	0	1	0	0	0.166667	0	0.333333	0.415037	1	1
12253	chr1:22194317-22194845	0	0	0	4	0	1	0.833333	0	1.66667	1.41504	0.251121	1
12289	chr1:22235200-22235525	0	0	0	1	0	0	0.166667	0	0.333333	0.415037	1	1
12293	chr1:22239256-22239397	0	1	0	3	0	1	0.833333	0.333333	1.33333	0.807355	0.491203	1
12307	chr1:22252416-22252760	0	0	0	4	0	0	0.666667	0	1.33333	1.22239	0.483516	1
12309	chr1:22255336-22255566	0	0	0	4	1	1	1	0	2	1.58496	0.0746606	1
12329	chr1:22269423-22269697	0	0	1	8	2	1	2	0.333333	3.66667	1.80735	0.143785	1
12330	chr1:22272155-22272882	0	0	0	1	0	0	0.166667	0	0.333333	0.415037	1	1
12339	chr1:22287057-22287279	1	1	0	2	1	1	1	0.666667	1.33333	0.485427	0.6875	1
12354	chr1:22305659-22305879	0	0	0	2	0	0	0.333333	0	0.666667	0.736966	0.666667	1
12369	chr1:22323773-22324106	3	1	1	10	1	1	2.83333	1.66667	4	0.906891	0.52907	1
12380	chr1:22330292-22330511	0	0	0	1	1	0	0.333333	0	0.666667	0.736966	0.5	1
12388	chr1:22344608-22344875	0	0	0	1	0	0	0.166667	0	0.333333	0.415037	1	1
12390	chr1:22349251-22349469	3	1	2	18	8	5	6.16667	2	10.3333	1.91754	0.0299485	1
12394	chr1:22351193-22351413	34	17	16	52	16	15	25	22.3333	27.6667	0.296982	0.715009	1
12399	chr1:22367338-22367402	0	2	1	0	1	0	0.666667	1	0.333333	-0.584963	0.625	1
12402	chr1:22370858-22371068	0	0	0	3	1	0	0.666667	0	1.33333	1.22239	0.250526	1
12417	chr1:22385069-22385306	5	1	1	3	2	0	2	2.33333	1.66667	-0.321928	0.838535	1
12418	chr1:22387335-22387825	1	0	0	0	0	0	0.166667	0.333333	0	-0.415037	1	1
12421	chr1:22388130-22388368	7	5	3	23	13	5	9.33333	5	13.6667	1.28951	0.108585	1
12423	chr1:22390307-22390584	0	1	0	1	1	0	0.5	0.333333	0.666667	0.321928	1	1
12425	chr1:22392345-22392593	0	0	0	2	1	0	0.5	0	1	1	0.25	1
12428	chr1:22402790-22402875	24	25	16	41	30	45	30.1667	21.6667	38.6667	0.807355	0.00156398	0.189031
12431	chr1:22405725-22405945	0	0	0	1	0	0	0.166667	0	0.333333	0.415037	1	1
12435	chr1:22421856-22422075	0	1	0	0	0	0	0.166667	0.333333	0	-0.415037	1	1
12439	chr1:22434186-22434517	0	0	0	1	0	0	0.166667	0	0.333333	0.415037	1	1
12465	chr1:22481773-22481957	0	1	0	2	2	1	1	0.333333	1.66667	1	0.21875	1
12482	chr1:22513124-22513911	1	0	0	1	0	0	0.333333	0.333333	0.333333	0	1	1
12484	chr1:22518872-22519268	2	1	1	2	1	0	1.16667	1.33333	1	-0.222392	1	1
12486	chr1:22520092-22520436	1	0	0	1	0	0	0.333333	0.333333	0.333333	0	1	1
12538	chr1:22632243-22632524	0	0	0	1	1	0	0.333333	0	0.666667	0.736966	0.5	1
12541	chr1:22638910-22639382	0	0	0	2	1	0	0.5	0	1	1	0.25	1
12543	chr1:22640582-22640816	0	1	0	1	1	1	0.666667	0.333333	1	0.584963	0.625	1
12546	chr1:22650997-22651393	1	0	0	0	0	0	0.166667	0.333333	0	-0.415037	1	1
12549	chr1:22657681-22657902	0	0	0	5	1	1	1.16667	0	2.33333	1.73697	0.099575	1
12565	chr1:22681459-22681686	1	1	0	6	1	0	1.5	0.666667	2.33333	1	0.495317	1
12589	chr1:22731966-22732235	2	1	0	7	1	1	2	1	3	1	0.431225	1
12605	chr1:22803886-22804066	0	0	0	1	0	1	0.333333	0	0.666667	0.736966	0.5	1
12616	chr1:22868468-22868690	0	0	0	0	1	1	0.333333	0	0.666667	0.736966	0.5	1
12639	chr1:22900565-22900834	0	0	0	1	1	0	0.333333	0	0.666667	0.736966	0.5	1
12674	chr1:22966290-22966603	3	2	1	11	2	2	3.5	2	5	1	0.386322	1
12704	chr1:23012973-23013049	14	26	38	16	11	14	19.8333	26	13.6667	-0.880418	0.0862632	1
12705	chr1:23015402-23015609	1	1	1	1	1	0	0.833333	1	0.666667	-0.263034	1	1
12710	chr1:23023800-23024243	0	0	0	1	1	1	0.5	0	1	1	0.25	1
12728	chr1:23042918-23043487	0	0	0	2	1	0	0.5	0	1	1	0.25	1
12730	chr1:23044972-23045599	0	0	0	2	0	0	0.333333	0	0.666667	0.736966	0.666667	1
12774	chr1:23164968-23165348	0	0	0	1	0	1	0.333333	0	0.666667	0.736966	0.5	1
12776	chr1:23172603-23172833	9	5	4	6	2	2	4.66667	6	3.33333	-0.691878	0.249078	1
12783	chr1:23185991-23186210	0	1	0	4	1	2	1.33333	0.333333	2.33333	1.32193	0.0703125	1
12789	chr1:23190632-23190842	2	2	0	3	1	1	1.5	1.33333	1.66667	0.192645	1	1
12799	chr1:23214628-23214881	0	1	0	0	0	0	0.166667	0.333333	0	-0.415037	1	1
12800	chr1:23220682-23221014	2	2	0	6	2	1	2.16667	1.33333	3	0.777608	0.427615	1
12804	chr1:23225405-23225610	0	0	0	1	1	0	0.333333	0	0.666667	0.736966	0.5	1
12815	chr1:23254467-23254553	12	9	4	18	8	14	10.8333	8.33333	13.3333	0.61891	0.209386	1
12831	chr1:23287950-23288165	0	0	0	2	1	0	0.5	0	1	1	0.25	1
12833	chr1:23290523-23290842	1	1	0	4	1	0	1.16667	0.666667	1.66667	0.678072	0.605225	1
12838	chr1:23310955-23311054	0	0	0	0	0	1	0.166667	0	0.333333	0.415037	1	1
12845	chr1:23321054-23321283	0	1	0	2	0	0	0.5	0.333333	0.666667	0.321928	1	1
12852	chr1:23337979-23338096	2	1	0	3	3	1	1.66667	1	2.33333	0.736966	0.34375	1
12855	chr1:23347857-23348082	0	1	0	14	1	3	3.16667	0.333333	6	2.39232	0.129812	1
12858	chr1:23351917-23352133	0	0	1	2	1	0	0.666667	0.333333	1	0.584963	0.625	1
12861	chr1:23359699-23359939	0	0	0	1	1	0	0.333333	0	0.666667	0.736966	0.5	1
12881	chr1:23444288-23444507	0	0	1	1	0	0	0.333333	0.333333	0.333333	0	1	1
12888	chr1:23457410-23457636	1	0	0	1	0	0	0.333333	0.333333	0.333333	0	1	1
12896	chr1:23468431-23468655	0	0	0	0	1	0	0.166667	0	0.333333	0.415037	1	1
12900	chr1:23476164-23476379	1	1	0	6	1	1	1.66667	0.666667	2.66667	1.1375	0.327034	1
12904	chr1:23485203-23485384	1	0	0	0	1	0	0.333333	0.333333	0.333333	0	1	1
12909	chr1:23489440-23489657	2	2	1	1	1	0	1.16667	1.66667	0.666667	-0.678072	0.453125	1
12924	chr1:23505367-23505572	1	0	0	1	1	0	0.5	0.333333	0.666667	0.321928	1	1
12925	chr1:23512706-23512925	3	3	3	6	2	1	3	3	3	0	1	1
12930	chr1:23532130-23532865	0	0	0	1	1	0	0.333333	0	0.666667	0.736966	0.5	1
12932	chr1:23539413-23539703	0	0	0	3	1	0	0.666667	0	1.33333	1.22239	0.250526	1
12955	chr1:23575154-23575219	4	10	6	34	34	52	23.3333	6.66667	40	2.41895	6.32509e-09	1.29389e-05
12959	chr1:23577033-23577444	1	1	1	2	1	1	1.16667	1	1.33333	0.222392	1	1
12968	chr1:23592600-23593031	0	0	0	1	0	0	0.166667	0	0.333333	0.415037	1	1
12969	chr1:23597444-23597749	0	0	0	1	1	0	0.333333	0	0.666667	0.736966	0.5	1
12972	chr1:23602520-23602738	3	2	1	4	2	1	2.16667	2	2.33333	0.152003	1	1
12973	chr1:23611414-23611554	0	0	0	1	1	1	0.5	0	1	1	0.25	1
12979	chr1:23626651-23627177	0	1	0	0	0	0	0.166667	0.333333	0	-0.415037	1	1
12983	chr1:23641429-23641697	0	0	0	2	0	0	0.333333	0	0.666667	0.736966	0.666667	1
12991	chr1:23657898-23658104	0	0	0	1	0	0	0.166667	0	0.333333	0.415037	1	1
12996	chr1:23661504-23661717	1	0	0	0	0	0	0.166667	0.333333	0	-0.415037	1	1
13002	chr1:23671909-23672124	0	0	0	3	1	1	0.833333	0	1.66667	1.41504	0.0625	1
13004	chr1:23672261-23672534	1	0	0	0	0	0	0.166667	0.333333	0	-0.415037	1	1
13009	chr1:23674679-23675087	0	0	0	2	0	0	0.333333	0	0.666667	0.736966	0.666667	1
13011	chr1:23679398-23679614	1	0	0	1	1	0	0.5	0.333333	0.666667	0.321928	1	1
13017	chr1:23704405-23704477	0	0	0	0	1	1	0.333333	0	0.666667	0.736966	0.5	1
13019	chr1:23704693-23704780	3	4	3	3	1	2	2.66667	3.33333	2	-0.530515	0.454498	1
13022	chr1:23713307-23713660	1	0	0	1	1	0	0.5	0.333333	0.666667	0.321928	1	1
13026	chr1:23733233-23733954	0	0	0	1	0	0	0.166667	0	0.333333	0.415037	1	1
13030	chr1:23741609-23741679	2	4	3	7	8	18	7	3	11	1.58496	0.0241982	0.932225
13040	chr1:23752317-23752535	1	0	0	0	0	0	0.166667	0.333333	0	-0.415037	1	1
13051	chr1:23780773-23781084	1	1	0	4	1	1	1.33333	0.666667	2	0.847997	0.344547	1
13060	chr1:23800554-23800760	0	1	0	0	0	0	0.166667	0.333333	0	-0.415037	1	1
13062	chr1:23801170-23801385	0	2	1	4	2	1	1.66667	1	2.33333	0.736966	0.34375	1
13067	chr1:23808696-23808939	0	0	1	5	3	1	1.66667	0.333333	3	1.58496	0.0422102	1
13072	chr1:23813435-23814210	0	0	0	0	1	0	0.166667	0	0.333333	0.415037	1	1
13076	chr1:23815562-23815775	0	0	0	1	1	0	0.333333	0	0.666667	0.736966	0.5	1
13092	chr1:23844210-23844587	0	0	0	1	0	0	0.166667	0	0.333333	0.415037	1	1
13107	chr1:23866887-23867094	2	2	0	7	5	2	3	1.33333	4.66667	1.28011	0.0554693	1
13108	chr1:23867784-23868027	0	0	0	3	2	1	1	0	2	1.58496	0.03125	1
13111	chr1:23872101-23872896	0	0	0	1	1	0	0.333333	0	0.666667	0.736966	0.5	1
13138	chr1:23912785-23913110	0	0	0	1	1	0	0.333333	0	0.666667	0.736966	0.5	1
13140	chr1:23917483-23917904	0	0	0	1	1	0	0.333333	0	0.666667	0.736966	0.5	1
13147	chr1:23926247-23926483	1	0	0	2	0	0	0.5	0.333333	0.666667	0.321928	1	1
13150	chr1:23943376-23943597	0	0	0	1	0	0	0.166667	0	0.333333	0.415037	1	1
13155	chr1:23954619-23954990	0	0	0	0	1	0	0.166667	0	0.333333	0.415037	1	1
13157	chr1:23955291-23955510	0	1	0	1	0	1	0.5	0.333333	0.666667	0.321928	1	1
13160	chr1:23962451-23962913	1	0	0	2	1	1	0.833333	0.333333	1.33333	0.807355	0.375	1
13162	chr1:23963773-23963977	8	6	4	17	10	5	8.33333	6	10.6667	0.736966	0.23576	1
13168	chr1:23975377-23976004	0	0	0	3	0	0	0.5	0	1	1	0.55	1
13172	chr1:23978560-23978777	2	1	0	1	1	1	1	1	1	0	1	1
13178	chr1:24006224-24006462	2	1	1	8	2	0	2.33333	1.33333	3.33333	0.893085	0.503742	1
13179	chr1:24007788-24008304	1	0	0	3	1	0	0.833333	0.333333	1.33333	0.807355	0.491203	1
13181	chr1:24011794-24012102	0	0	0	1	0	0	0.166667	0	0.333333	0.415037	1	1
13187	chr1:24017585-24017832	3	2	0	11	3	0	3.16667	1.66667	4.66667	1.08746	0.441982	1
13192	chr1:24026837-24027039	1	0	0	3	1	0	0.833333	0.333333	1.33333	0.807355	0.491203	1
13197	chr1:24032525-24032736	1	1	1	0	0	0	0.5	1	0	-1	0.25	1
13199	chr1:24032986-24033350	0	0	1	0	0	0	0.166667	0.333333	0	-0.415037	1	1
13207	chr1:24039336-24039801	1	1	1	0	0	0	0.5	1	0	-1	0.25	1
13209	chr1:24040359-24040582	0	0	0	0	1	0	0.166667	0	0.333333	0.415037	1	1
13211	chr1:24040714-24040947	2	2	1	0	0	0	0.833333	1.66667	0	-1.41504	0.0625	1
13233	chr1:24071037-24071184	20	24	6	22	20	8	16.6667	16.6667	16.6667	0	1	1
13234	chr1:24072409-24072702	0	0	0	3	1	1	0.833333	0	1.66667	1.41504	0.0625	1
13246	chr1:24101575-24101798	1	0	0	2	0	0	0.5	0.333333	0.666667	0.321928	1	1
13249	chr1:24104049-24104265	1	1	1	7	3	3	2.66667	1	4.33333	1.41504	0.0212708	0.866721
13252	chr1:24114849-24115054	0	0	0	3	0	0	0.5	0	1	1	0.55	1
13275	chr1:24145925-24146143	0	0	1	0	0	0	0.166667	0.333333	0	-0.415037	1	1
13282	chr1:24154980-24155360	0	0	0	1	0	0	0.166667	0	0.333333	0.415037	1	1
13284	chr1:24161869-24162092	0	1	0	6	3	3	2.16667	0.333333	4	1.90689	0.00341797	0.314246
13288	chr1:24165994-24166202	1	1	1	1	1	0	0.833333	1	0.666667	-0.263034	1	1
13291	chr1:24177616-24177778	0	0	0	1	1	0	0.333333	0	0.666667	0.736966	0.5	1
13297	chr1:24187515-24187737	0	0	0	0	1	0	0.166667	0	0.333333	0.415037	1	1
13300	chr1:24190670-24190891	0	0	1	0	0	0	0.166667	0.333333	0	-0.415037	1	1
13306	chr1:24203791-24204049	1	0	0	3	1	1	1	0.333333	1.66667	1	0.21875	1
13310	chr1:24210019-24210239	1	0	0	4	1	0	1	0.333333	1.66667	1	0.43436	1
13321	chr1:24222090-24222297	0	2	0	5	1	1	1.5	0.666667	2.33333	1	0.375183	1
13334	chr1:24234074-24234160	1	1	1	0	1	1	0.833333	1	0.666667	-0.263034	1	1
13336	chr1:24246133-24246349	0	0	0	3	0	1	0.666667	0	1.33333	1.22239	0.250526	1
13338	chr1:24251093-24251748	0	0	0	1	1	0	0.333333	0	0.666667	0.736966	0.5	1
13341	chr1:24252944-24253030	0	1	1	2	0	0	0.666667	0.666667	0.666667	0	1	1
13343	chr1:24254587-24254958	0	0	0	1	0	0	0.166667	0	0.333333	0.415037	1	1
13348	chr1:24266426-24266646	2	1	1	5	2	1	2	1.33333	2.66667	0.652077	0.424669	1
13358	chr1:24301014-24301243	1	1	0	4	2	1	1.5	0.666667	2.33333	1	0.179688	1
13361	chr1:24309567-24309706	0	1	0	2	1	1	0.833333	0.333333	1.33333	0.807355	0.375	1
13363	chr1:24310193-24310726	1	1	0	3	1	0	1	0.666667	1.33333	0.485427	0.730304	1
13365	chr1:24317983-24318615	3	0	1	3	2	0	1.5	1.33333	1.66667	0.192645	1	1
13367	chr1:24318696-24319214	0	1	0	2	0	0	0.5	0.333333	0.666667	0.321928	1	1
13373	chr1:24347405-24347475	3	10	7	16	9	19	10.6667	6.66667	14.6667	1.03103	0.0302564	1
13376	chr1:24351490-24351716	0	1	0	2	0	0	0.5	0.333333	0.666667	0.321928	1	1
13379	chr1:24352547-24352751	0	1	0	0	0	1	0.333333	0.333333	0.333333	0	1	1
13381	chr1:24360398-24360614	0	1	0	1	0	0	0.333333	0.333333	0.333333	0	1	1
13382	chr1:24361481-24361815	0	0	0	1	1	0	0.333333	0	0.666667	0.736966	0.5	1
13400	chr1:24403097-24403626	0	0	0	0	1	0	0.166667	0	0.333333	0.415037	1	1
13424	chr1:24441513-24441918	2	0	0	3	1	1	1.16667	0.666667	1.66667	0.678072	0.484103	1
13429	chr1:24444670-24444873	0	0	0	10	3	3	2.66667	0	5.33333	2.66297	0.00847725	0.534406
13438	chr1:24475328-24475529	2	1	0	13	5	2	3.83333	1	6.66667	1.9386	0.0831896	1
13440	chr1:24476712-24477342	1	0	0	0	0	0	0.166667	0.333333	0	-0.415037	1	1
13442	chr1:24478346-24478808	0	0	0	4	1	0	0.833333	0	1.66667	1.41504	0.251121	1
13445	chr1:24480151-24480370	0	0	0	1	1	0	0.333333	0	0.666667	0.736966	0.5	1
13446	chr1:24481092-24481319	0	0	0	3	3	0	1	0	2	1.58496	0.0746606	1
13465	chr1:24535285-24535719	0	1	1	0	0	0	0.333333	0.666667	0	-0.736966	0.5	1
13469	chr1:24544570-24545399	1	0	0	0	0	0	0.166667	0.333333	0	-0.415037	1	1
13471	chr1:24561968-24562243	1	1	0	8	2	1	2.16667	0.666667	3.66667	1.48543	0.21346	1
13477	chr1:24586704-24586928	0	1	0	1	0	1	0.5	0.333333	0.666667	0.321928	1	1
13493	chr1:24619124-24619370	1	2	1	0	0	0	0.666667	1.33333	0	-1.22239	0.125	1
13495	chr1:24624893-24625112	0	1	0	3	0	0	0.666667	0.333333	1	0.584963	0.775401	1
13533	chr1:24698370-24698592	0	0	0	1	1	0	0.333333	0	0.666667	0.736966	0.5	1
13538	chr1:24700842-24700954	0	0	0	1	1	0	0.333333	0	0.666667	0.736966	0.5	1
13542	chr1:24722016-24722231	0	0	0	1	0	0	0.166667	0	0.333333	0.415037	1	1
13549	chr1:24749774-24750044	0	0	0	1	0	1	0.333333	0	0.666667	0.736966	0.5	1
13553	chr1:24763445-24763666	0	0	0	0	0	1	0.166667	0	0.333333	0.415037	1	1
13564	chr1:24802645-24802955	0	0	0	1	1	0	0.333333	0	0.666667	0.736966	0.5	1
13570	chr1:24807384-24807715	1	0	0	4	0	0	0.833333	0.333333	1.33333	0.807355	0.660778	1
13572	chr1:24812626-24812820	0	1	0	1	0	0	0.333333	0.333333	0.333333	0	1	1
13590	chr1:24839429-24839651	0	0	0	1	0	0	0.166667	0	0.333333	0.415037	1	1
13595	chr1:24845357-24845722	1	0	0	0	0	0	0.166667	0.333333	0	-0.415037	1	1
13597	chr1:24849647-24849829	1	2	1	2	1	0	1.16667	1.33333	1	-0.222392	1	1
13598	chr1:24859040-24859363	1	0	0	1	0	0	0.333333	0.333333	0.333333	0	1	1
13600	chr1:24860572-24861021	0	0	0	1	0	0	0.166667	0	0.333333	0.415037	1	1
13605	chr1:24868918-24869137	3	2	1	4	2	0	2	2	2	0	1	1
13621	chr1:24890568-24890928	0	0	1	2	2	0	0.833333	0.333333	1.33333	0.807355	0.375	1
13628	chr1:24901380-24901597	0	1	0	3	1	1	1	0.333333	1.66667	1	0.21875	1
13633	chr1:24909601-24910131	0	0	0	0	1	0	0.166667	0	0.333333	0.415037	1	1
13640	chr1:24916407-24916880	0	0	0	2	1	0	0.5	0	1	1	0.25	1
13651	chr1:24929247-24929455	0	0	0	2	1	0	0.5	0	1	1	0.25	1
13653	chr1:24937342-24937509	2	2	1	9	4	3	3.5	1.66667	5.33333	1.24793	0.0712401	1
13656	chr1:24939159-24939368	1	1	1	2	1	0	1	1	1	0	1	1
13665	chr1:24955714-24955942	1	1	0	8	4	1	2.5	0.666667	4.33333	1.67807	0.0859964	1
13669	chr1:24958259-24958629	0	0	0	1	0	0	0.166667	0	0.333333	0.415037	1	1
13671	chr1:24961063-24961204	0	1	1	3	1	1	1.16667	0.666667	1.66667	0.678072	0.453125	1
13674	chr1:24967502-24967736	0	0	0	1	1	0	0.333333	0	0.666667	0.736966	0.5	1
13680	chr1:24985393-24985609	0	1	0	2	1	0	0.666667	0.333333	1	0.584963	0.625	1
13693	chr1:25012980-25013198	1	0	0	5	0	1	1.16667	0.333333	2	1.16993	0.402927	1
13700	chr1:25018557-25018692	0	0	0	1	0	0	0.166667	0	0.333333	0.415037	1	1
13703	chr1:25026713-25027097	1	0	0	2	0	0	0.5	0.333333	0.666667	0.321928	1	1
13713	chr1:25043301-25043520	3	2	1	3	1	1	1.83333	2	1.66667	-0.169925	1	1
13725	chr1:25063531-25063740	1	1	2	3	2	1	1.66667	1.33333	2	0.36257	0.753906	1
13726	chr1:25070569-25071105	2	0	0	0	1	0	0.5	0.666667	0.333333	-0.321928	1	1
13739	chr1:25078110-25078279	0	0	0	3	4	2	1.5	0	3	2	0.00390625	0.334344
13744	chr1:25079307-25079528	0	0	0	1	1	0	0.333333	0	0.666667	0.736966	0.5	1
13763	chr1:25123538-25123758	0	0	0	1	0	0	0.166667	0	0.333333	0.415037	1	1
13773	chr1:25158223-25158445	0	0	0	3	1	0	0.666667	0	1.33333	1.22239	0.250526	1
13886	chr1:25396123-25396380	1	0	0	0	0	0	0.166667	0.333333	0	-0.415037	1	1
13900	chr1:25447880-25448099	0	0	0	2	1	1	0.666667	0	1.33333	1.22239	0.125	1
13909	chr1:25470152-25470489	3	1	1	6	2	2	2.5	1.66667	3.33333	0.70044	0.372307	1
13914	chr1:25481974-25482195	0	1	0	1	0	0	0.333333	0.333333	0.333333	0	1	1
13916	chr1:25492916-25493068	0	0	0	1	0	0	0.166667	0	0.333333	0.415037	1	1
13923	chr1:25505978-25506185	1	1	1	10	5	1	3.16667	1	5.33333	1.66297	0.105392	1
13926	chr1:25507252-25507484	1	1	0	3	2	2	1.5	0.666667	2.33333	1	0.179688	1
13939	chr1:25535752-25535977	0	0	0	1	0	0	0.166667	0	0.333333	0.415037	1	1
13942	chr1:25536494-25537079	1	0	0	0	0	0	0.166667	0.333333	0	-0.415037	1	1
13945	chr1:25539617-25539829	1	2	2	1	1	0	1.16667	1.66667	0.666667	-0.678072	0.453125	1
13949	chr1:25546771-25547068	0	0	0	5	2	1	1.33333	0	2.66667	1.87447	0.0320445	1
13953	chr1:25552050-25552273	0	0	0	1	0	0	0.166667	0	0.333333	0.415037	1	1
13957	chr1:25562424-25562684	1	0	0	0	0	0	0.166667	0.333333	0	-0.415037	1	1
13975	chr1:25609039-25609310	0	0	0	1	0	0	0.166667	0	0.333333	0.415037	1	1
14020	chr1:25674881-25675100	0	1	0	0	0	0	0.166667	0.333333	0	-0.415037	1	1
14025	chr1:25676973-25677192	1	0	0	0	0	0	0.166667	0.333333	0	-0.415037	1	1
14029	chr1:25684222-25684746	1	1	0	1	0	0	0.5	0.666667	0.333333	-0.321928	1	1
14045	chr1:25707486-25707852	0	0	0	2	1	0	0.5	0	1	1	0.25	1
14046	chr1:25712831-25713237	0	0	0	1	0	0	0.166667	0	0.333333	0.415037	1	1
14056	chr1:25737014-25737283	1	0	0	1	0	1	0.5	0.333333	0.666667	0.321928	1	1
14091	chr1:25841001-25841221	2	2	0	4	2	1	1.83333	1.33333	2.33333	0.514573	0.548828	1
14127	chr1:25909267-25909487	1	1	0	4	1	1	1.33333	0.666667	2	0.847997	0.344547	1
14130	chr1:25917882-25918095	5	4	5	10	4	2	5	4.66667	5.33333	0.160465	0.891612	1
14132	chr1:25918952-25919173	0	0	0	1	0	1	0.333333	0	0.666667	0.736966	0.5	1
14133	chr1:25923073-25923298	7	3	3	6	1	1	3.5	4.33333	2.66667	-0.540568	0.535668	1
14136	chr1:25928195-25928454	1	2	0	4	2	1	1.66667	1	2.33333	0.736966	0.34375	1
14161	chr1:25971110-25971437	1	0	0	0	1	0	0.333333	0.333333	0.333333	0	1	1
14173	chr1:26006647-26006863	3	3	1	1	1	0	1.5	2.33333	0.666667	-1	0.179688	1
14179	chr1:26044160-26044441	0	0	0	1	1	0	0.333333	0	0.666667	0.736966	0.5	1
14191	chr1:26089643-26089683	0	0	0	1	1	2	0.666667	0	1.33333	1.22239	0.125	1
14194	chr1:26091221-26091463	0	0	0	2	0	0	0.333333	0	0.666667	0.736966	0.666667	1
14211	chr1:26115353-26115572	0	0	0	1	0	1	0.333333	0	0.666667	0.736966	0.5	1
14221	chr1:26133406-26133643	1	0	0	0	0	0	0.166667	0.333333	0	-0.415037	1	1
14242	chr1:26166248-26166465	0	1	0	0	1	0	0.333333	0.333333	0.333333	0	1	1
14244	chr1:26170691-26170997	1	1	1	0	1	0	0.666667	1	0.333333	-0.584963	0.625	1
14260	chr1:26194902-26195542	0	0	0	2	0	0	0.333333	0	0.666667	0.736966	0.666667	1
14273	chr1:26221687-26222210	0	0	0	1	0	0	0.166667	0	0.333333	0.415037	1	1
14276	chr1:26228189-26228425	0	1	0	1	0	0	0.333333	0.333333	0.333333	0	1	1
14284	chr1:26241726-26241965	1	1	1	0	0	0	0.5	1	0	-1	0.25	1
14296	chr1:26251675-26251943	0	0	0	5	2	2	1.5	0	3	2	0.00390625	0.334344
14298	chr1:26261298-26261731	1	0	0	1	0	0	0.333333	0.333333	0.333333	0	1	1
14336	chr1:26345904-26346250	0	0	0	2	0	1	0.5	0	1	1	0.25	1
14356	chr1:26374505-26374722	0	0	0	2	1	0	0.5	0	1	1	0.25	1
14363	chr1:26398366-26399141	0	0	0	2	0	0	0.333333	0	0.666667	0.736966	0.666667	1
14365	chr1:26399901-26400589	1	0	0	0	1	0	0.333333	0.333333	0.333333	0	1	1
14373	chr1:26418805-26419406	1	0	0	0	0	0	0.166667	0.333333	0	-0.415037	1	1
14383	chr1:26443300-26443894	0	0	0	1	0	0	0.166667	0	0.333333	0.415037	1	1
14384	chr1:26443895-26444158	0	0	0	1	1	0	0.333333	0	0.666667	0.736966	0.5	1
14395	chr1:26467420-26467725	0	0	0	1	1	0	0.333333	0	0.666667	0.736966	0.5	1
14397	chr1:26468016-26468237	1	1	1	9	3	2	2.83333	1	4.66667	1.5025	0.112915	1
14401	chr1:26469073-26469298	1	0	0	1	0	0	0.333333	0.333333	0.333333	0	1	1
14406	chr1:26479433-26479811	3	1	1	1	1	0	1.16667	1.66667	0.666667	-0.678072	0.453125	1
14414	chr1:26489929-26490294	1	0	0	1	0	0	0.333333	0.333333	0.333333	0	1	1
14423	chr1:26521281-26521499	3	1	2	14	3	2	4.16667	2	6.33333	1.28951	0.299894	1
14426	chr1:26522086-26522308	0	1	0	3	1	1	1	0.333333	1.66667	1	0.21875	1
14427	chr1:26532190-26532895	0	0	0	1	0	0	0.166667	0	0.333333	0.415037	1	1
14431	chr1:26534647-26534998	3	2	2	8	4	2	3.5	2.33333	4.66667	0.765535	0.264443	1
14436	chr1:26540499-26540706	0	0	1	0	1	2	0.666667	0.333333	1	0.584963	0.625	1
14437	chr1:26543883-26544121	0	1	0	1	1	1	0.666667	0.333333	1	0.584963	0.625	1
14440	chr1:26546181-26546397	0	0	1	4	2	1	1.33333	0.333333	2.33333	1.32193	0.0703125	1
14443	chr1:26552483-26552762	8	6	9	14	9	10	9.33333	7.66667	11	0.469485	0.228806	1
14446	chr1:26553360-26553567	1	1	1	12	4	2	3.5	1	6	1.80735	0.102865	1
14447	chr1:26555976-26556201	0	1	0	1	0	0	0.333333	0.333333	0.333333	0	1	1
14455	chr1:26572929-26573144	0	0	0	1	0	0	0.166667	0	0.333333	0.415037	1	1
14464	chr1:26585994-26586906	0	0	0	1	0	0	0.166667	0	0.333333	0.415037	1	1
14469	chr1:26591568-26591846	0	0	0	1	0	0	0.166667	0	0.333333	0.415037	1	1
14476	chr1:26614487-26614561	5	10	8	4	2	4	5.5	7.66667	3.33333	-1	0.035082	1
14486	chr1:26638027-26638318	0	1	0	1	1	0	0.5	0.333333	0.666667	0.321928	1	1
14490	chr1:26646296-26646535	12	9	7	10	3	2	7.16667	9.33333	5	-0.784271	0.166499	1
14500	chr1:26659759-26659981	10	7	5	2	2	1	4.5	7.33333	1.66667	-1.64386	0.00151372	0.184868
14509	chr1:26667197-26667457	1	1	0	3	0	0	0.833333	0.666667	1	0.263034	1	1
14526	chr1:26692387-26692595	0	0	0	0	1	0	0.166667	0	0.333333	0.415037	1	1
14528	chr1:26695869-26696083	1	1	1	4	1	1	1.5	1	2	0.584963	0.507813	1
14530	chr1:26699548-26699803	5	4	1	7	5	2	4	3.33333	4.66667	0.387023	0.597583	1
14535	chr1:26706543-26706760	0	0	0	1	1	0	0.333333	0	0.666667	0.736966	0.5	1
14536	chr1:26707299-26707632	1	0	0	0	0	0	0.166667	0.333333	0	-0.415037	1	1
14539	chr1:26713861-26714564	0	0	0	1	1	0	0.333333	0	0.666667	0.736966	0.5	1
14545	chr1:26722663-26723014	3	1	0	3	1	0	1.33333	1.33333	1.33333	0	1	1
14548	chr1:26728802-26729053	2	1	0	1	1	0	0.833333	1	0.666667	-0.263034	1	1
14550	chr1:26731407-26731729	0	0	0	0	1	0	0.166667	0	0.333333	0.415037	1	1
14564	chr1:26744705-26744961	1	0	0	5	3	1	1.66667	0.333333	3	1.58496	0.0422102	1
14567	chr1:26749631-26749857	0	2	1	9	3	1	2.66667	1	4.33333	1.41504	0.213299	1
14569	chr1:26749994-26750218	2	2	3	2	1	1	1.83333	2.33333	1.33333	-0.514573	0.548828	1
14573	chr1:26757966-26758275	5	2	2	8	3	1	3.5	3	4	0.321928	0.776357	1
14589	chr1:26780538-26780822	0	0	0	1	0	0	0.166667	0	0.333333	0.415037	1	1
14599	chr1:26806846-26807067	0	0	0	2	1	0	0.5	0	1	1	0.25	1
14607	chr1:26815292-26815721	0	0	0	1	0	0	0.166667	0	0.333333	0.415037	1	1
14624	chr1:26854730-26854931	0	0	0	1	0	0	0.166667	0	0.333333	0.415037	1	1
14648	chr1:26889421-26890032	0	0	0	1	0	0	0.166667	0	0.333333	0.415037	1	1
14654	chr1:26915159-26915485	1	0	0	1	0	0	0.333333	0.333333	0.333333	0	1	1
14655	chr1:26917719-26918313	1	0	0	1	0	0	0.333333	0.333333	0.333333	0	1	1
14659	chr1:26927595-26927815	1	1	0	3	1	0	1	0.666667	1.33333	0.485427	0.730304	1
14661	chr1:26939046-26939265	3	3	3	1	1	1	2	3	1	-1	0.145996	1
14669	chr1:26948615-26948838	2	2	0	4	1	1	1.66667	1.33333	2	0.36257	0.784535	1
14675	chr1:26959176-26959519	0	0	0	0	1	1	0.333333	0	0.666667	0.736966	0.5	1
14677	chr1:26960565-26960788	2	0	0	1	2	0	0.833333	0.666667	1	0.263034	1	1
14702	chr1:26998138-26998328	1	1	1	2	1	1	1.16667	1	1.33333	0.222392	1	1
14705	chr1:27008542-27008785	0	0	0	0	1	0	0.166667	0	0.333333	0.415037	1	1
14708	chr1:27012651-27012868	2	2	1	3	2	1	1.83333	1.66667	2	0.169925	1	1
14722	chr1:27042331-27042621	1	0	0	0	1	0	0.333333	0.333333	0.333333	0	1	1
14726	chr1:27046133-27046356	1	1	1	3	0	0	1	1	1	0	1	1
14734	chr1:27065472-27065829	0	1	0	3	0	0	0.666667	0.333333	1	0.584963	0.775401	1
14735	chr1:27070028-27070247	4	3	2	6	2	2	3.16667	3	3.33333	0.115477	1	1
14739	chr1:27075137-27075580	0	0	0	1	0	0	0.166667	0	0.333333	0.415037	1	1
14752	chr1:27091347-27091903	1	0	0	0	1	0	0.333333	0.333333	0.333333	0	1	1
14758	chr1:27118912-27119148	1	0	0	0	0	0	0.166667	0.333333	0	-0.415037	1	1
14764	chr1:27134302-27134532	0	0	0	1	0	0	0.166667	0	0.333333	0.415037	1	1
14779	chr1:27157367-27157942	0	0	0	2	0	0	0.333333	0	0.666667	0.736966	0.666667	1
14801	chr1:27192753-27192864	0	2	1	10	3	4	3.33333	1	5.66667	1.73697	0.0421798	1
14803	chr1:27193254-27194057	0	0	0	0	1	0	0.166667	0	0.333333	0.415037	1	1
14805	chr1:27200353-27200570	0	0	0	0	0	1	0.166667	0	0.333333	0.415037	1	1
14808	chr1:27209596-27210455	1	0	0	0	0	0	0.166667	0.333333	0	-0.415037	1	1
14813	chr1:27220105-27220431	0	0	0	3	1	0	0.666667	0	1.33333	1.22239	0.250526	1
14824	chr1:27234111-27234594	1	0	0	0	1	0	0.333333	0.333333	0.333333	0	1	1
14848	chr1:27273048-27273267	0	0	0	1	1	0	0.333333	0	0.666667	0.736966	0.5	1
14863	chr1:27289827-27290200	1	0	0	0	0	0	0.166667	0.333333	0	-0.415037	1	1
14864	chr1:27294819-27295154	0	0	0	0	1	0	0.166667	0	0.333333	0.415037	1	1
14869	chr1:27301292-27301660	0	0	0	2	0	0	0.333333	0	0.666667	0.736966	0.666667	1
14874	chr1:27308500-27308709	0	0	0	1	0	0	0.166667	0	0.333333	0.415037	1	1
14877	chr1:27311748-27311828	0	0	0	2	2	1	0.833333	0	1.66667	1.41504	0.0625	1
14881	chr1:27316731-27317184	0	0	0	2	0	0	0.333333	0	0.666667	0.736966	0.666667	1
14897	chr1:27339601-27340067	1	0	1	2	1	0	0.833333	0.666667	1	0.263034	1	1
14900	chr1:27340301-27340797	0	0	0	0	1	0	0.166667	0	0.333333	0.415037	1	1
14904	chr1:27346917-27347427	0	0	0	1	1	0	0.333333	0	0.666667	0.736966	0.5	1
14911	chr1:27354670-27354903	1	0	0	1	1	1	0.666667	0.333333	1	0.584963	0.625	1
14914	chr1:27356579-27356683	1	1	1	4	2	1	1.66667	1	2.33333	0.736966	0.34375	1
14924	chr1:27367253-27367492	1	2	1	5	2	2	2.16667	1.33333	3	0.777608	0.266846	1
14925	chr1:27378551-27378899	0	1	0	3	1	0	0.833333	0.333333	1.33333	0.807355	0.491203	1
14930	chr1:27383139-27383361	0	0	0	1	1	0	0.333333	0	0.666667	0.736966	0.5	1
14933	chr1:27389348-27389837	0	0	0	1	0	0	0.166667	0	0.333333	0.415037	1	1
14937	chr1:27394758-27394998	0	0	0	1	0	0	0.166667	0	0.333333	0.415037	1	1
14949	chr1:27419109-27419326	1	1	1	0	0	1	0.666667	1	0.333333	-0.584963	0.625	1
14950	chr1:27421709-27421927	29	14	15	7	3	1	11.5	19.3333	3.66667	-2.12338	0.00115129	0.152931
14971	chr1:27450411-27450897	1	0	0	5	1	1	1.33333	0.333333	2.33333	1.32193	0.214843	1
14981	chr1:27473322-27473715	1	0	0	0	0	0	0.166667	0.333333	0	-0.415037	1	1
14992	chr1:27496323-27496563	0	0	1	0	1	0	0.333333	0.333333	0.333333	0	1	1
14993	chr1:27498044-27498264	1	0	0	0	0	0	0.166667	0.333333	0	-0.415037	1	1
15007	chr1:27532120-27532192	0	5	6	2	3	10	4.33333	3.66667	5	0.36257	0.75434	1
15017	chr1:27558361-27558574	1	1	1	6	3	2	2.33333	1	3.66667	1.22239	0.057373	1
15037	chr1:27572154-27572454	4	5	2	1	1	0	2.16667	3.66667	0.666667	-1.48543	0.0224609	0.884451
15039	chr1:27574303-27574593	0	1	0	3	2	0	1	0.333333	1.66667	1	0.288983	1
15040	chr1:27578315-27578463	1	1	0	1	1	0	0.666667	0.666667	0.666667	0	1	1
15051	chr1:27595299-27595518	1	0	0	0	1	0	0.333333	0.333333	0.333333	0	1	1
15052	chr1:27613356-27613578	2	2	2	0	0	0	1	2	0	-1.58496	0.03125	1
15055	chr1:27619346-27619591	0	0	0	1	0	0	0.166667	0	0.333333	0.415037	1	1
15059	chr1:27635547-27635959	1	0	0	0	0	0	0.166667	0.333333	0	-0.415037	1	1
15063	chr1:27639668-27639882	0	1	0	1	1	1	0.666667	0.333333	1	0.584963	0.625	1
15066	chr1:27649973-27650188	2	0	0	1	1	0	0.666667	0.666667	0.666667	0	1	1
15103	chr1:27701634-27702097	1	0	0	0	1	0	0.333333	0.333333	0.333333	0	1	1
15108	chr1:27714319-27714540	0	1	0	3	2	1	1.16667	0.333333	2	1.16993	0.125	1
15121	chr1:27728608-27728834	0	1	1	5	2	2	1.83333	0.666667	3	1.26303	0.0654297	1
15128	chr1:27738061-27738281	0	0	1	2	0	0	0.5	0.333333	0.666667	0.321928	1	1
15142	chr1:27787493-27787581	0	1	0	1	1	0	0.5	0.333333	0.666667	0.321928	1	1
15179	chr1:27838790-27839105	3	1	1	2	1	1	1.5	1.66667	1.33333	-0.192645	1	1
15190	chr1:27857725-27857943	0	0	0	0	1	1	0.333333	0	0.666667	0.736966	0.5	1
15215	chr1:27907439-27907808	1	0	1	1	1	0	0.666667	0.666667	0.666667	0	1	1
15216	chr1:27911002-27911738	0	1	0	2	1	0	0.666667	0.333333	1	0.584963	0.625	1
15249	chr1:27958741-27958953	10	7	4	4	2	1	4.66667	7	2.33333	-1.26303	0.0231297	0.902962
15252	chr1:27962611-27962833	1	1	0	1	1	1	0.833333	0.666667	1	0.263034	1	1
15254	chr1:27968073-27968299	0	1	0	0	0	0	0.166667	0.333333	0	-0.415037	1	1
15266	chr1:27988375-27988611	1	1	1	0	1	0	0.666667	1	0.333333	-0.584963	0.625	1
15287	chr1:28041663-28042019	0	0	0	1	0	0	0.166667	0	0.333333	0.415037	1	1
15290	chr1:28048844-28049066	11	7	8	10	3	2	6.83333	8.66667	5	-0.688056	0.230889	1
15303	chr1:28058426-28058642	0	1	0	0	0	0	0.166667	0.333333	0	-0.415037	1	1
15306	chr1:28060772-28060982	1	0	0	2	1	0	0.666667	0.333333	1	0.584963	0.625	1
15329	chr1:28109938-28110157	0	0	0	1	0	0	0.166667	0	0.333333	0.415037	1	1
15342	chr1:28163601-28163866	0	0	0	1	0	0	0.166667	0	0.333333	0.415037	1	1
15349	chr1:28172394-28172688	0	0	0	1	0	0	0.166667	0	0.333333	0.415037	1	1
15350	chr1:28174616-28174840	0	0	0	1	1	0	0.333333	0	0.666667	0.736966	0.5	1
15368	chr1:28197508-28197872	3	1	1	1	0	0	1	1.66667	0.333333	-1	0.21875	1
15372	chr1:28202305-28202527	1	0	1	3	2	0	1.16667	0.666667	1.66667	0.678072	0.484103	1
15377	chr1:28214002-28214635	3	1	0	1	0	0	0.833333	1.33333	0.333333	-0.807355	0.491203	1
15380	chr1:28217319-28217768	4	2	1	3	2	0	2	2.33333	1.66667	-0.321928	0.791252	1
15384	chr1:28226716-28226935	0	1	0	0	0	0	0.166667	0.333333	0	-0.415037	1	1
15393	chr1:28242379-28242658	1	0	0	0	0	0	0.166667	0.333333	0	-0.415037	1	1
15396	chr1:28243674-28243751	3	2	3	3	2	1	2.33333	2.66667	2	-0.289507	0.790527	1
15407	chr1:28257979-28258201	2	1	0	1	1	0	0.833333	1	0.666667	-0.263034	1	1
15412	chr1:28263234-28263456	3	3	1	9	4	3	3.83333	2.33333	5.33333	0.925999	0.173355	1
15425	chr1:28285769-28285997	2	1	1	7	2	3	2.66667	1.33333	4	1.09954	0.130819	1
15434	chr1:28295678-28295901	0	1	0	0	1	0	0.333333	0.333333	0.333333	0	1	1
15446	chr1:28335958-28336085	0	0	0	0	1	0	0.166667	0	0.333333	0.415037	1	1
15448	chr1:28341727-28341964	1	0	0	1	1	0	0.5	0.333333	0.666667	0.321928	1	1
15451	chr1:28346306-28346526	0	0	0	13	6	3	3.66667	0	7.33333	3.05889	0.00245937	0.249988
15453	chr1:28356200-28356415	0	0	0	0	1	0	0.166667	0	0.333333	0.415037	1	1
15454	chr1:28364549-28364871	1	0	0	1	1	0	0.5	0.333333	0.666667	0.321928	1	1
15465	chr1:28386325-28386721	4	2	1	1	0	0	1.33333	2.33333	0.333333	-1.32193	0.0703125	1
15473	chr1:28415616-28416143	2	1	1	5	1	0	1.66667	1.33333	2	0.36257	0.836766	1
15475	chr1:28427162-28427401	0	0	0	3	0	0	0.5	0	1	1	0.55	1
15480	chr1:28432735-28433021	0	0	0	1	0	0	0.166667	0	0.333333	0.415037	1	1
15487	chr1:28448076-28448290	0	1	0	0	1	0	0.333333	0.333333	0.333333	0	1	1
15489	chr1:28450602-28450846	1	0	0	0	0	0	0.166667	0.333333	0	-0.415037	1	1
15494	chr1:28466024-28466418	9	2	3	0	0	1	2.5	4.66667	0.333333	-2.08746	0.0434649	1
15504	chr1:28478815-28479178	0	0	0	1	0	0	0.166667	0	0.333333	0.415037	1	1
15513	chr1:28497540-28497758	8	3	5	8	3	2	4.83333	5.33333	4.33333	-0.247928	0.778916	1
15518	chr1:28510276-28510322	0	0	0	0	1	0	0.166667	0	0.333333	0.415037	1	1
15523	chr1:28514383-28515187	0	0	0	1	0	0	0.166667	0	0.333333	0.415037	1	1
15531	chr1:28528884-28529482	1	0	0	0	0	0	0.166667	0.333333	0	-0.415037	1	1
15532	chr1:28545716-28545944	1	0	0	0	0	0	0.166667	0.333333	0	-0.415037	1	1
15534	chr1:28547486-28547774	0	0	0	1	0	0	0.166667	0	0.333333	0.415037	1	1
15536	chr1:28552730-28552938	1	1	2	1	0	0	0.833333	1.33333	0.333333	-0.807355	0.375	1
15539	chr1:28558372-28558601	0	0	0	1	0	0	0.166667	0	0.333333	0.415037	1	1
15543	chr1:28561253-28561688	1	0	0	2	1	0	0.666667	0.333333	1	0.584963	0.625	1
15551	chr1:28572104-28572318	1	1	0	4	1	1	1.33333	0.666667	2	0.847997	0.344547	1
15556	chr1:28578625-28578997	1	0	1	6	1	0	1.5	0.666667	2.33333	1	0.495317	1
15558	chr1:28579522-28579737	0	1	0	0	0	0	0.166667	0.333333	0	-0.415037	1	1
15562	chr1:28583337-28583557	5	4	1	9	3	3	4.16667	3.33333	5	0.469485	0.57076	1
15570	chr1:28596388-28596786	1	0	0	1	0	0	0.333333	0.333333	0.333333	0	1	1
15580	chr1:28626821-28627159	0	0	1	0	1	0	0.333333	0.333333	0.333333	0	1	1
15583	chr1:28630095-28630300	0	0	0	1	0	0	0.166667	0	0.333333	0.415037	1	1
15587	chr1:28639070-28640055	0	0	0	1	0	0	0.166667	0	0.333333	0.415037	1	1
15588	chr1:28645431-28645654	0	0	0	1	1	1	0.5	0	1	1	0.25	1
15597	chr1:28657933-28658151	1	1	0	3	1	1	1.16667	0.666667	1.66667	0.678072	0.453125	1
15604	chr1:28664754-28664973	4	2	3	1	2	1	2.16667	3	1.33333	-0.777608	0.266846	1
15606	chr1:28667436-28667506	0	0	1	1	1	1	0.666667	0.333333	1	0.584963	0.625	1
15608	chr1:28668772-28669327	0	0	0	1	0	0	0.166667	0	0.333333	0.415037	1	1
15611	chr1:28675154-28675319	0	0	0	0	1	0	0.166667	0	0.333333	0.415037	1	1
15619	chr1:28678047-28678478	0	0	0	4	1	0	0.833333	0	1.66667	1.41504	0.251121	1
15627	chr1:28684961-28685179	0	0	0	1	0	0	0.166667	0	0.333333	0.415037	1	1
15629	chr1:28691047-28691335	0	1	0	1	1	0	0.5	0.333333	0.666667	0.321928	1	1
15631	chr1:28693795-28694013	0	0	0	0	1	0	0.166667	0	0.333333	0.415037	1	1
15633	chr1:28694437-28694790	0	0	0	2	0	0	0.333333	0	0.666667	0.736966	0.666667	1
15659	chr1:28741475-28741696	0	0	0	0	1	0	0.166667	0	0.333333	0.415037	1	1
15662	chr1:28749391-28749616	2	1	0	3	0	1	1.16667	1	1.33333	0.222392	1	1
15670	chr1:28767000-28767112	1	0	0	0	0	0	0.166667	0.333333	0	-0.415037	1	1
15676	chr1:28777415-28777698	0	0	0	1	0	0	0.166667	0	0.333333	0.415037	1	1
15679	chr1:28791602-28791895	4	2	2	4	4	4	3.33333	2.66667	4	0.447459	0.503445	1
15681	chr1:28796269-28796494	4	3	3	1	0	0	1.83333	3.33333	0.333333	-1.70044	0.0117188	0.640547
15683	chr1:28798078-28798648	1	0	0	0	0	0	0.166667	0.333333	0	-0.415037	1	1
15690	chr1:28803691-28803990	1	0	0	0	0	0	0.166667	0.333333	0	-0.415037	1	1
15692	chr1:28808503-28808723	1	1	0	0	1	0	0.5	0.666667	0.333333	-0.321928	1	1
15693	chr1:28809125-28809260	0	0	0	3	0	0	0.5	0	1	1	0.55	1
15697	chr1:28814709-28814933	0	0	0	1	1	0	0.333333	0	0.666667	0.736966	0.5	1
15701	chr1:28819556-28819974	0	0	0	1	1	0	0.333333	0	0.666667	0.736966	0.5	1
15705	chr1:28828989-28829213	0	0	0	1	0	0	0.166667	0	0.333333	0.415037	1	1
15708	chr1:28831053-28831570	2	1	0	2	1	0	1	1	1	0	1	1
15713	chr1:28834199-28834429	16	13	9	22	13	11	14	12.6667	15.3333	0.257158	0.554787	1
15714	chr1:28836861-28837040	13	11	10	30	15	11	15	11.3333	18.6667	0.67319	0.22998	1
15717	chr1:28838266-28838762	1	1	0	3	1	0	1	0.666667	1.33333	0.485427	0.730304	1
15731	chr1:28854230-28855064	1	0	0	0	0	0	0.166667	0.333333	0	-0.415037	1	1
15745	chr1:28867542-28867866	1	0	0	3	0	0	0.666667	0.333333	1	0.584963	0.775401	1
15755	chr1:28878539-28878776	0	0	0	1	1	1	0.5	0	1	1	0.25	1
15758	chr1:28880415-28880634	1	1	0	5	4	2	2.16667	0.666667	3.66667	1.48543	0.0224609	0.884451
15774	chr1:28899940-28900209	0	0	0	0	1	0	0.166667	0	0.333333	0.415037	1	1
15785	chr1:28910015-28910234	0	0	1	14	2	1	3	0.333333	5.66667	2.32193	0.17738	1
15796	chr1:28941898-28942115	0	0	0	0	1	0	0.166667	0	0.333333	0.415037	1	1
15805	chr1:28955942-28956332	0	0	0	1	0	0	0.166667	0	0.333333	0.415037	1	1
15808	chr1:28957224-28957481	1	0	0	1	0	0	0.333333	0.333333	0.333333	0	1	1
15810	chr1:28958454-28958952	0	1	1	0	1	0	0.5	0.666667	0.333333	-0.321928	1	1
15820	chr1:28965397-28965595	0	0	0	1	1	0	0.333333	0	0.666667	0.736966	0.5	1
15826	chr1:28971869-28972084	0	0	0	1	1	0	0.333333	0	0.666667	0.736966	0.5	1
15835	chr1:28994062-28994279	0	0	0	1	0	1	0.333333	0	0.666667	0.736966	0.5	1
15843	chr1:29005516-29006001	0	0	0	1	0	0	0.166667	0	0.333333	0.415037	1	1
15860	chr1:29020122-29020265	2	3	5	3	1	1	2.5	3.33333	1.66667	-0.70044	0.301758	1
15867	chr1:29026035-29026300	2	2	1	1	1	0	1.16667	1.66667	0.666667	-0.678072	0.453125	1
15878	chr1:29037414-29037722	0	0	1	0	0	0	0.166667	0.333333	0	-0.415037	1	1
15885	chr1:29047746-29047972	1	0	0	0	0	0	0.166667	0.333333	0	-0.415037	1	1
15886	chr1:29049272-29049543	0	1	0	1	1	0	0.5	0.333333	0.666667	0.321928	1	1
15888	chr1:29055032-29055298	1	0	1	8	3	1	2.33333	0.666667	4	1.58496	0.136043	1
15904	chr1:29075797-29076043	7	6	4	2	1	0	3.33333	5.66667	1	-1.73697	0.00257683	0.254652
15906	chr1:29078908-29079158	1	0	0	1	0	0	0.333333	0.333333	0.333333	0	1	1
15909	chr1:29086161-29086392	0	1	0	0	0	0	0.166667	0.333333	0	-0.415037	1	1
15913	chr1:29087957-29088173	2	1	2	0	0	0	0.833333	1.66667	0	-1.41504	0.0625	1
15915	chr1:29088606-29088828	0	0	0	0	1	0	0.166667	0	0.333333	0.415037	1	1
15918	chr1:29089428-29089665	0	0	0	4	1	0	0.833333	0	1.66667	1.41504	0.251121	1
15939	chr1:29129957-29130430	0	0	0	1	1	0	0.333333	0	0.666667	0.736966	0.5	1
15944	chr1:29133798-29134256	1	0	0	0	0	0	0.166667	0.333333	0	-0.415037	1	1
15953	chr1:29147708-29148135	0	1	0	0	0	0	0.166667	0.333333	0	-0.415037	1	1
15963	chr1:29173657-29173742	1	2	0	2	2	0	1.16667	1	1.33333	0.222392	1	1
15984	chr1:29196857-29197068	1	2	0	3	1	0	1.16667	1	1.33333	0.222392	1	1
15987	chr1:29197916-29198135	5	2	3	2	1	0	2.16667	3.33333	1	-1.11548	0.0922852	1
15991	chr1:29204511-29204734	5	3	3	23	10	7	8.5	3.66667	13.3333	1.61891	0.0477062	1
16016	chr1:29246069-29246317	0	0	0	1	0	0	0.166667	0	0.333333	0.415037	1	1
16020	chr1:29249233-29249585	0	0	0	1	0	0	0.166667	0	0.333333	0.415037	1	1
16049	chr1:29337293-29337554	1	1	1	0	1	0	0.666667	1	0.333333	-0.584963	0.625	1
16061	chr1:29383554-29383812	1	0	0	0	0	0	0.166667	0.333333	0	-0.415037	1	1
16114	chr1:29464370-29464589	0	1	0	2	0	0	0.5	0.333333	0.666667	0.321928	1	1
16126	chr1:29498897-29499175	2	2	1	2	1	0	1.33333	1.66667	1	-0.415037	0.726563	1
16129	chr1:29500055-29500310	0	1	0	1	0	0	0.333333	0.333333	0.333333	0	1	1
16130	chr1:29500374-29500625	0	0	0	1	0	0	0.166667	0	0.333333	0.415037	1	1
16138	chr1:29509149-29509682	1	0	1	2	1	0	0.833333	0.666667	1	0.263034	1	1
16143	chr1:29530602-29530655	0	0	1	0	1	2	0.666667	0.333333	1	0.584963	0.625	1
16146	chr1:29531790-29531996	1	1	2	0	0	0	0.666667	1.33333	0	-1.22239	0.125	1
16182	chr1:29590344-29590610	0	0	0	1	1	0	0.333333	0	0.666667	0.736966	0.5	1
16197	chr1:29623660-29623882	1	1	1	3	2	0	1.33333	1	1.66667	0.415037	0.726563	1
16207	chr1:29641183-29641403	0	0	0	1	0	0	0.166667	0	0.333333	0.415037	1	1
16236	chr1:29761475-29761697	1	0	0	1	0	1	0.5	0.333333	0.666667	0.321928	1	1
16282	chr1:30055867-30056138	2	1	2	7	1	1	2.33333	1.66667	3	0.584963	0.630459	1
16300	chr1:30099957-30100360	0	1	0	3	2	0	1	0.333333	1.66667	1	0.288983	1
16305	chr1:30110568-30111009	1	1	0	3	1	1	1.16667	0.666667	1.66667	0.678072	0.453125	1
16312	chr1:30149625-30149841	0	0	0	2	0	0	0.333333	0	0.666667	0.736966	0.666667	1
16328	chr1:30179577-30179827	6	1	1	5	2	2	2.83333	2.66667	3	0.125531	1	1
16334	chr1:30184196-30184495	0	0	0	1	0	0	0.166667	0	0.333333	0.415037	1	1
16406	chr1:30489049-30489303	0	0	0	1	1	0	0.333333	0	0.666667	0.736966	0.5	1
16408	chr1:30493156-30493406	0	0	0	1	1	0	0.333333	0	0.666667	0.736966	0.5	1
16451	chr1:30651489-30651709	0	0	0	4	1	0	0.833333	0	1.66667	1.41504	0.251121	1
16463	chr1:30682531-30682788	1	1	0	4	1	0	1.16667	0.666667	1.66667	0.678072	0.605225	1
16538	chr1:30973238-30973463	0	1	0	2	0	0	0.5	0.333333	0.666667	0.321928	1	1
16545	chr1:30993783-30993963	1	2	0	3	1	1	1.33333	1	1.66667	0.415037	0.726563	1
16566	chr1:31144341-31144552	0	0	1	4	1	0	1	0.333333	1.66667	1	0.43436	1
16597	chr1:31190595-31190812	6	4	3	6	3	3	4.16667	4.33333	4	-0.0931094	1	1
16633	chr1:31263305-31263485	1	0	0	1	0	1	0.5	0.333333	0.666667	0.321928	1	1
16653	chr1:31302270-31302491	0	1	0	0	0	0	0.166667	0.333333	0	-0.415037	1	1
16675	chr1:31330392-31330647	0	1	1	0	1	0	0.5	0.666667	0.333333	-0.321928	1	1
16677	chr1:31335611-31335835	1	0	0	1	1	0	0.5	0.333333	0.666667	0.321928	1	1
16679	chr1:31335988-31336337	0	0	0	1	0	0	0.166667	0	0.333333	0.415037	1	1
16694	chr1:31364427-31364624	30	19	12	10	6	4	13.5	20.3333	6.66667	-1.47644	0.0119558	0.648307
16700	chr1:31372315-31373100	0	0	0	2	0	0	0.333333	0	0.666667	0.736966	0.666667	1
16715	chr1:31394699-31394955	0	0	0	2	0	0	0.333333	0	0.666667	0.736966	0.666667	1
16717	chr1:31398322-31398527	0	1	0	2	1	0	0.666667	0.333333	1	0.584963	0.625	1
16721	chr1:31400949-31401214	0	0	0	9	2	1	2	0	4	2.32193	0.0805127	1
16728	chr1:31425677-31425747	1	1	1	0	0	0	0.5	1	0	-1	0.25	1
16738	chr1:31496481-31496700	1	0	0	4	1	0	1	0.333333	1.66667	1	0.43436	1
16740	chr1:31502554-31502980	0	0	0	1	0	1	0.333333	0	0.666667	0.736966	0.5	1
16745	chr1:31506333-31506663	2	1	1	0	0	0	0.666667	1.33333	0	-1.22239	0.125	1
16749	chr1:31512163-31512388	0	0	0	0	0	1	0.166667	0	0.333333	0.415037	1	1
16752	chr1:31518616-31519157	0	0	0	1	0	0	0.166667	0	0.333333	0.415037	1	1
16754	chr1:31519682-31519960	30	12	12	6	2	2	10.6667	18	3.33333	-2.13245	0.010271	0.622081
16757	chr1:31524953-31525235	0	0	0	1	0	0	0.166667	0	0.333333	0.415037	1	1
16759	chr1:31525644-31526156	3	1	0	4	1	0	1.5	1.33333	1.66667	0.192645	1	1
16765	chr1:31543814-31544144	3	1	0	1	0	0	0.833333	1.33333	0.333333	-0.807355	0.491203	1
16769	chr1:31547643-31548291	0	1	0	0	0	0	0.166667	0.333333	0	-0.415037	1	1
16770	chr1:31548409-31548655	1	1	0	1	1	0	0.666667	0.666667	0.666667	0	1	1
16772	chr1:31549482-31549705	0	0	0	0	1	0	0.166667	0	0.333333	0.415037	1	1
16781	chr1:31561822-31562142	0	0	0	1	0	0	0.166667	0	0.333333	0.415037	1	1
16783	chr1:31569331-31569552	1	1	0	4	3	1	1.66667	0.666667	2.66667	1.1375	0.109375	1
16799	chr1:31582265-31582513	5	2	1	1	1	1	1.83333	2.66667	1	-0.874469	0.26651	1
16803	chr1:31585101-31585324	3	3	1	37	11	6	10.1667	2.33333	18	2.51096	0.070463	1
16817	chr1:31612816-31613039	1	0	0	1	0	0	0.333333	0.333333	0.333333	0	1	1
16824	chr1:31619250-31619513	0	0	1	0	1	1	0.5	0.333333	0.666667	0.321928	1	1
16825	chr1:31619518-31620137	0	1	0	1	0	0	0.333333	0.333333	0.333333	0	1	1
16830	chr1:31622282-31622503	1	0	0	1	1	0	0.5	0.333333	0.666667	0.321928	1	1
16840	chr1:31631901-31632126	1	1	1	2	2	0	1.16667	1	1.33333	0.222392	1	1
16841	chr1:31633969-31634190	2	2	3	3	1	0	1.83333	2.33333	1.33333	-0.514573	0.548828	1
16851	chr1:31646475-31646693	0	1	0	0	0	0	0.166667	0.333333	0	-0.415037	1	1
16854	chr1:31666228-31666467	0	0	0	3	1	1	0.833333	0	1.66667	1.41504	0.0625	1
16865	chr1:31678783-31679006	0	1	0	0	1	0	0.333333	0.333333	0.333333	0	1	1
16867	chr1:31681888-31682146	2	8	7	2	1	1	3.5	5.66667	1.33333	-1.51457	0.0280651	1
16877	chr1:31694376-31694690	1	0	0	1	0	0	0.333333	0.333333	0.333333	0	1	1
16879	chr1:31694819-31695037	1	2	1	4	3	1	2	1.33333	2.66667	0.652077	0.387695	1
16896	chr1:31713883-31714144	2	2	2	6	2	1	2.5	2	3	0.415037	0.665456	1
16904	chr1:31745821-31746411	1	0	0	0	0	0	0.166667	0.333333	0	-0.415037	1	1
16909	chr1:31748330-31748552	1	0	1	0	0	1	0.5	0.666667	0.333333	-0.321928	1	1
16913	chr1:31758184-31758564	0	0	0	2	0	0	0.333333	0	0.666667	0.736966	0.666667	1
16914	chr1:31760480-31760934	1	0	0	3	0	0	0.666667	0.333333	1	0.584963	0.775401	1
16919	chr1:31762763-31762870	16	4	2	15	21	5	10.5	7.33333	13.6667	0.815575	0.348929	1
16920	chr1:31767487-31767713	1	1	1	1	1	0	0.833333	1	0.666667	-0.263034	1	1
16936	chr1:31860912-31861120	0	1	0	1	0	0	0.333333	0.333333	0.333333	0	1	1
16941	chr1:31864926-31865176	0	0	0	1	0	1	0.333333	0	0.666667	0.736966	0.5	1
16947	chr1:31880450-31880678	0	0	0	2	0	1	0.5	0	1	1	0.25	1
16953	chr1:31890797-31891016	2	1	4	0	1	0	1.33333	2.33333	0.333333	-1.32193	0.0703125	1
16955	chr1:31891316-31891534	2	2	1	3	1	1	1.66667	1.66667	1.66667	0	1	1
16965	chr1:31919267-31919588	0	0	0	0	1	0	0.166667	0	0.333333	0.415037	1	1
16970	chr1:31932012-31932233	2	2	1	6	2	2	2.5	1.66667	3.33333	0.70044	0.332437	1
16972	chr1:31941157-31941376	0	0	0	1	0	0	0.166667	0	0.333333	0.415037	1	1
16989	chr1:32023660-32023915	0	0	0	2	0	0	0.333333	0	0.666667	0.736966	0.666667	1
16991	chr1:32026575-32026781	0	1	1	0	0	0	0.333333	0.666667	0	-0.736966	0.5	1
16992	chr1:32033330-32033417	0	1	0	1	0	0	0.333333	0.333333	0.333333	0	1	1
17007	chr1:32060465-32060736	0	1	0	2	1	0	0.666667	0.333333	1	0.584963	0.625	1
17009	chr1:32065230-32065742	0	0	0	2	0	0	0.333333	0	0.666667	0.736966	0.666667	1
17018	chr1:32099176-32099480	0	0	0	1	1	0	0.333333	0	0.666667	0.736966	0.5	1
17022	chr1:32107488-32107758	1	0	0	0	0	0	0.166667	0.333333	0	-0.415037	1	1
17135	chr1:32291052-32291404	1	1	0	0	0	0	0.333333	0.666667	0	-0.736966	0.5	1
17138	chr1:32294292-32294509	1	1	1	3	1	1	1.33333	1	1.66667	0.415037	0.726563	1
17147	chr1:32309597-32309994	4	2	2	0	0	0	1.33333	2.66667	0	-1.87447	0.0078125	0.500208
17151	chr1:32317589-32317812	1	0	0	0	0	0	0.166667	0.333333	0	-0.415037	1	1
17157	chr1:32342638-32343591	0	0	0	1	0	0	0.166667	0	0.333333	0.415037	1	1
17158	chr1:32347599-32347822	0	0	0	0	1	0	0.166667	0	0.333333	0.415037	1	1
17161	chr1:32353781-32354232	0	0	0	1	0	0	0.166667	0	0.333333	0.415037	1	1
17162	chr1:32364406-32364634	0	1	0	1	1	0	0.5	0.333333	0.666667	0.321928	1	1
17175	chr1:32389029-32389296	0	0	0	1	0	0	0.166667	0	0.333333	0.415037	1	1
17176	chr1:32390998-32391285	2	2	0	3	1	2	1.66667	1.33333	2	0.36257	0.753906	1
17182	chr1:32401783-32401964	2	7	2	18	8	9	7.66667	3.66667	11.6667	1.44057	0.0269193	1
17186	chr1:32404619-32404910	1	1	0	2	0	1	0.833333	0.666667	1	0.263034	1	1
17191	chr1:32411596-32411835	0	0	0	1	0	0	0.166667	0	0.333333	0.415037	1	1
17196	chr1:32416568-32416787	0	0	0	1	1	0	0.333333	0	0.666667	0.736966	0.5	1
17201	chr1:32430343-32430710	0	0	0	2	1	0	0.5	0	1	1	0.25	1
17207	chr1:32437282-32437677	0	0	0	3	1	1	0.833333	0	1.66667	1.41504	0.0625	1
17213	chr1:32453535-32453823	0	1	0	0	0	0	0.166667	0.333333	0	-0.415037	1	1
17217	chr1:32457966-32458188	0	0	0	1	0	0	0.166667	0	0.333333	0.415037	1	1
17219	chr1:32470109-32470535	0	0	0	1	1	0	0.333333	0	0.666667	0.736966	0.5	1
17230	chr1:32484948-32485075	0	0	0	0	1	1	0.333333	0	0.666667	0.736966	0.5	1
17235	chr1:32487311-32487575	3	2	2	14	3	2	4.33333	2.33333	6.33333	1.1375	0.342588	1
17237	chr1:32487662-32487762	0	1	0	7	1	1	1.66667	0.333333	3	1.58496	0.23078	1
17238	chr1:32488010-32488415	2	0	1	3	1	1	1.33333	1	1.66667	0.415037	0.726563	1
17245	chr1:32492489-32492845	0	0	0	1	0	0	0.166667	0	0.333333	0.415037	1	1
17268	chr1:32530326-32530572	1	0	0	1	0	0	0.333333	0.333333	0.333333	0	1	1
17269	chr1:32533155-32533392	0	0	0	3	1	0	0.666667	0	1.33333	1.22239	0.250526	1
17280	chr1:32545464-32545802	0	0	0	1	0	0	0.166667	0	0.333333	0.415037	1	1
17281	chr1:32551056-32551276	1	1	1	1	0	0	0.666667	1	0.333333	-0.584963	0.625	1
17296	chr1:32574864-32575097	6	5	3	15	4	4	6.16667	4.66667	7.66667	0.612977	0.483289	1
17300	chr1:32576069-32576422	0	0	0	1	1	0	0.333333	0	0.666667	0.736966	0.5	1
17306	chr1:32581862-32581920	0	2	0	7	5	14	4.66667	0.666667	8.66667	2.53605	0.001851	0.210947
17308	chr1:32585439-32585644	0	0	0	2	1	0	0.5	0	1	1	0.25	1
17313	chr1:32599917-32600163	0	0	0	0	1	0	0.166667	0	0.333333	0.415037	1	1
17315	chr1:32603432-32603660	2	0	1	1	1	0	0.833333	1	0.666667	-0.263034	1	1
17320	chr1:32614252-32614605	1	0	0	2	0	0	0.5	0.333333	0.666667	0.321928	1	1
17322	chr1:32615827-32616709	0	0	0	1	0	0	0.166667	0	0.333333	0.415037	1	1
17327	chr1:32627824-32628629	0	0	0	1	0	0	0.166667	0	0.333333	0.415037	1	1
17331	chr1:32647970-32648187	1	1	0	1	0	0	0.5	0.666667	0.333333	-0.321928	1	1
17349	chr1:32690365-32691051	0	0	0	1	0	0	0.166667	0	0.333333	0.415037	1	1
17371	chr1:32712052-32712178	2	1	0	1	0	1	0.833333	1	0.666667	-0.263034	1	1
17376	chr1:32718804-32718887	0	1	0	2	1	1	0.833333	0.333333	1.33333	0.807355	0.375	1
17378	chr1:32718980-32719023	1	1	1	2	1	2	1.33333	1	1.66667	0.415037	0.726563	1
17385	chr1:32736089-32736402	0	0	0	1	0	0	0.166667	0	0.333333	0.415037	1	1
17395	chr1:32758352-32758846	0	0	0	6	3	2	1.83333	0	3.66667	2.22239	0.00212492	0.224934
17403	chr1:32789092-32789372	0	0	0	3	1	0	0.666667	0	1.33333	1.22239	0.250526	1
17416	chr1:32809909-32810702	0	0	0	1	0	0	0.166667	0	0.333333	0.415037	1	1
17422	chr1:32820302-32821076	0	1	1	0	0	0	0.333333	0.666667	0	-0.736966	0.5	1
17433	chr1:32835957-32836329	0	0	0	0	1	0	0.166667	0	0.333333	0.415037	1	1
17437	chr1:32845949-32846171	0	0	0	1	1	0	0.333333	0	0.666667	0.736966	0.5	1
17441	chr1:32851623-32851844	0	0	0	3	0	0	0.5	0	1	1	0.55	1
17446	chr1:32854649-32854991	1	0	0	0	0	0	0.166667	0.333333	0	-0.415037	1	1
17449	chr1:32861306-32861526	1	1	1	7	7	3	3.33333	1	5.66667	1.73697	0.00257683	0.254652
17451	chr1:32863537-32863988	0	0	0	2	0	0	0.333333	0	0.666667	0.736966	0.666667	1
17457	chr1:32868944-32869210	0	0	0	1	0	0	0.166667	0	0.333333	0.415037	1	1
17458	chr1:32870518-32871187	0	0	0	1	0	0	0.166667	0	0.333333	0.415037	1	1
17466	chr1:32885228-32885315	2	3	0	3	2	3	2.16667	1.66667	2.66667	0.459432	0.581055	1
17473	chr1:32906395-32906630	0	0	0	1	0	0	0.166667	0	0.333333	0.415037	1	1
17479	chr1:32912835-32913169	0	0	0	1	1	0	0.333333	0	0.666667	0.736966	0.5	1
17481	chr1:32921077-32921299	1	0	0	1	1	0	0.5	0.333333	0.666667	0.321928	1	1
17490	chr1:32947976-32948196	0	1	0	0	1	0	0.333333	0.333333	0.333333	0	1	1
17492	chr1:32965248-32965573	15	5	3	15	5	3	7.66667	7.66667	7.66667	0	1	1
17498	chr1:32970136-32970356	1	1	0	0	0	0	0.333333	0.666667	0	-0.736966	0.5	1
17509	chr1:32986359-32987103	0	1	0	3	0	0	0.666667	0.333333	1	0.584963	0.775401	1
17511	chr1:32994986-32995204	1	0	1	1	1	1	0.833333	0.666667	1	0.263034	1	1
17524	chr1:33014332-33014713	0	0	0	1	0	0	0.166667	0	0.333333	0.415037	1	1
17532	chr1:33019176-33019411	0	0	0	2	0	0	0.333333	0	0.666667	0.736966	0.666667	1
17534	chr1:33020666-33020914	0	0	0	0	1	0	0.166667	0	0.333333	0.415037	1	1
17539	chr1:33024806-33025002	2	3	1	6	3	2	2.83333	2	3.66667	0.63743	0.332306	1
17540	chr1:33033100-33033317	0	1	0	0	0	0	0.166667	0.333333	0	-0.415037	1	1
17542	chr1:33039375-33039601	1	0	0	0	0	0	0.166667	0.333333	0	-0.415037	1	1
17545	chr1:33043759-33044168	0	0	0	1	0	0	0.166667	0	0.333333	0.415037	1	1
17548	chr1:33047712-33048173	0	0	0	1	0	0	0.166667	0	0.333333	0.415037	1	1
17552	chr1:33051773-33051844	0	0	0	0	1	0	0.166667	0	0.333333	0.415037	1	1
17556	chr1:33059406-33059719	1	0	0	0	0	0	0.166667	0.333333	0	-0.415037	1	1
17559	chr1:33060962-33061573	0	0	0	1	0	0	0.166667	0	0.333333	0.415037	1	1
17565	chr1:33068824-33069042	0	0	0	1	0	0	0.166667	0	0.333333	0.415037	1	1
17568	chr1:33074271-33074551	0	0	0	1	1	1	0.5	0	1	1	0.25	1
17572	chr1:33077012-33077437	1	1	1	3	1	0	1.16667	1	1.33333	0.222392	1	1
17575	chr1:33078080-33078450	4	2	1	5	1	1	2.33333	2.33333	2.33333	0	1	1
17584	chr1:33107206-33107446	1	0	0	0	1	0	0.333333	0.333333	0.333333	0	1	1
17591	chr1:33115359-33115579	4	3	4	10	4	3	4.66667	3.66667	5.66667	0.514573	0.452437	1
17593	chr1:33119353-33120006	0	0	0	1	1	0	0.333333	0	0.666667	0.736966	0.5	1
17595	chr1:33123547-33123617	0	0	0	0	0	1	0.166667	0	0.333333	0.415037	1	1
17608	chr1:33148591-33148807	0	0	0	3	1	1	0.833333	0	1.66667	1.41504	0.0625	1
17610	chr1:33152569-33153197	0	0	0	0	1	0	0.166667	0	0.333333	0.415037	1	1
17613	chr1:33154633-33155205	0	0	0	0	1	0	0.166667	0	0.333333	0.415037	1	1
17614	chr1:33155231-33155466	1	0	0	1	0	0	0.333333	0.333333	0.333333	0	1	1
17621	chr1:33158049-33158528	0	0	0	2	1	0	0.5	0	1	1	0.25	1
17623	chr1:33158777-33159074	0	0	0	6	1	1	1.33333	0	2.66667	1.87447	0.116508	1
17640	chr1:33179341-33179569	0	1	0	0	1	1	0.5	0.333333	0.666667	0.321928	1	1
17645	chr1:33193733-33194048	0	0	0	2	1	1	0.666667	0	1.33333	1.22239	0.125	1
17649	chr1:33198150-33198507	0	0	0	1	0	0	0.166667	0	0.333333	0.415037	1	1
17650	chr1:33200064-33200298	0	1	0	0	1	0	0.333333	0.333333	0.333333	0	1	1
17653	chr1:33202193-33202394	11	4	3	9	5	3	5.83333	6	5.66667	-0.0703893	1	1
17657	chr1:33204870-33205091	0	0	0	0	0	1	0.166667	0	0.333333	0.415037	1	1
17667	chr1:33211540-33211756	0	0	0	2	1	0	0.5	0	1	1	0.25	1
17704	chr1:33267642-33267954	1	0	0	0	0	0	0.166667	0.333333	0	-0.415037	1	1
17711	chr1:33280084-33280331	19	13	10	4	2	1	8.16667	14	2.33333	-2.16993	1.51418e-05	0.00664131
17716	chr1:33287663-33288142	2	1	0	1	0	1	0.833333	1	0.666667	-0.263034	1	1
17721	chr1:33299056-33299126	0	1	0	0	1	1	0.5	0.333333	0.666667	0.321928	1	1
17724	chr1:33303641-33303859	0	0	0	1	0	0	0.166667	0	0.333333	0.415037	1	1
17774	chr1:33367468-33367819	0	0	0	0	1	0	0.166667	0	0.333333	0.415037	1	1
17779	chr1:33374007-33374229	0	0	0	2	0	0	0.333333	0	0.666667	0.736966	0.666667	1
17781	chr1:33377128-33377346	0	1	0	1	0	1	0.5	0.333333	0.666667	0.321928	1	1
17783	chr1:33379222-33379496	1	1	1	5	1	1	1.66667	1	2.33333	0.736966	0.457952	1
17785	chr1:33382835-33383054	0	0	0	1	0	1	0.333333	0	0.666667	0.736966	0.5	1
17786	chr1:33387111-33387665	0	0	0	1	0	0	0.166667	0	0.333333	0.415037	1	1
17794	chr1:33399985-33400206	1	0	0	18	5	3	4.5	0.333333	8.66667	2.85798	0.0360046	1
17797	chr1:33416534-33416780	0	0	0	3	0	0	0.5	0	1	1	0.55	1
17802	chr1:33423909-33424241	0	0	0	2	1	0	0.5	0	1	1	0.25	1
17811	chr1:33441828-33442208	0	0	0	0	1	0	0.166667	0	0.333333	0.415037	1	1
17824	chr1:33467953-33468902	0	0	0	0	1	0	0.166667	0	0.333333	0.415037	1	1
17833	chr1:33504358-33504582	0	1	0	1	1	1	0.666667	0.333333	1	0.584963	0.625	1
17857	chr1:33550291-33550509	0	1	1	3	1	1	1.16667	0.666667	1.66667	0.678072	0.453125	1
17863	chr1:33569577-33569888	0	0	0	1	0	0	0.166667	0	0.333333	0.415037	1	1
17873	chr1:33595554-33595831	1	0	0	0	0	0	0.166667	0.333333	0	-0.415037	1	1
17896	chr1:33667887-33668123	0	1	1	1	2	0	0.833333	0.666667	1	0.263034	1	1
17900	chr1:33691970-33692390	0	0	0	1	0	0	0.166667	0	0.333333	0.415037	1	1
17903	chr1:33695101-33695319	1	3	1	15	4	2	4.33333	1.66667	7	1.58496	0.206723	1
17906	chr1:33701546-33702075	1	0	0	2	0	0	0.5	0.333333	0.666667	0.321928	1	1
17935	chr1:33750721-33750939	1	0	0	3	1	1	1	0.333333	1.66667	1	0.21875	1
17966	chr1:33841729-33841953	0	0	0	1	1	0	0.333333	0	0.666667	0.736966	0.5	1
17974	chr1:33885304-33885583	0	0	0	1	0	0	0.166667	0	0.333333	0.415037	1	1
17992	chr1:33912631-33912843	0	1	0	1	0	0	0.333333	0.333333	0.333333	0	1	1
18021	chr1:34078375-34078606	1	1	1	2	3	1	1.5	1	2	0.584963	0.507813	1
18036	chr1:34113602-34113886	1	1	0	1	0	1	0.666667	0.666667	0.666667	0	1	1
18042	chr1:34130109-34130327	1	2	0	6	1	1	1.83333	1	2.66667	0.874469	0.457469	1
18073	chr1:34366054-34366305	1	1	1	2	2	1	1.33333	1	1.66667	0.415037	0.726563	1
18101	chr1:34458132-34458402	0	1	0	1	1	0	0.5	0.333333	0.666667	0.321928	1	1
18113	chr1:34519958-34520265	0	0	0	1	0	0	0.166667	0	0.333333	0.415037	1	1
18124	chr1:34568993-34569273	0	0	0	3	0	1	0.666667	0	1.33333	1.22239	0.250526	1
18131	chr1:34594954-34595177	0	0	0	3	1	0	0.666667	0	1.33333	1.22239	0.250526	1
18135	chr1:34611967-34612783	0	0	0	2	0	0	0.333333	0	0.666667	0.736966	0.666667	1
18152	chr1:34689162-34689389	1	1	0	4	1	0	1.16667	0.666667	1.66667	0.678072	0.605225	1
18154	chr1:34712749-34712970	2	3	1	12	2	2	3.66667	2	5.33333	1.078	0.378542	1
18156	chr1:34725203-34725398	1	1	0	3	0	1	1	0.666667	1.33333	0.485427	0.730304	1
18173	chr1:34847220-34847656	0	0	0	2	0	0	0.333333	0	0.666667	0.736966	0.666667	1
18178	chr1:34888781-34889283	0	0	0	2	0	1	0.5	0	1	1	0.25	1
18190	chr1:34962106-34962348	1	1	0	1	0	1	0.666667	0.666667	0.666667	0	1	1
18198	chr1:35050717-35050941	1	1	0	5	1	1	1.5	0.666667	2.33333	1	0.333338	1
18202	chr1:35063118-35063231	0	1	0	0	0	0	0.166667	0.333333	0	-0.415037	1	1
18208	chr1:35089627-35089970	2	1	1	3	1	1	1.5	1.33333	1.66667	0.192645	1	1
18216	chr1:35172277-35172511	0	0	0	1	1	1	0.5	0	1	1	0.25	1
18232	chr1:35233610-35234043	0	0	0	1	1	0	0.333333	0	0.666667	0.736966	0.5	1
18242	chr1:35282912-35283128	0	0	0	5	1	3	1.5	0	3	2	0.0108735	0.631448
18245	chr1:35302234-35302459	2	1	1	1	0	0	0.833333	1.33333	0.333333	-0.807355	0.375	1
18264	chr1:35335184-35335393	0	0	0	1	0	0	0.166667	0	0.333333	0.415037	1	1
18271	chr1:35347638-35348003	0	1	0	1	0	0	0.333333	0.333333	0.333333	0	1	1
18278	chr1:35352649-35352898	2	1	1	3	2	1	1.66667	1.33333	2	0.36257	0.753906	1
18281	chr1:35361723-35362114	0	0	0	1	1	0	0.333333	0	0.666667	0.736966	0.5	1
18298	chr1:35396590-35397059	1	0	0	1	1	0	0.5	0.333333	0.666667	0.321928	1	1
18301	chr1:35404993-35405349	0	0	0	1	0	0	0.166667	0	0.333333	0.415037	1	1
18303	chr1:35417525-35417745	0	1	0	5	1	1	1.33333	0.333333	2.33333	1.32193	0.214843	1
18304	chr1:35434602-35434832	0	0	0	2	1	0	0.5	0	1	1	0.25	1
18316	chr1:35445763-35446108	1	0	0	0	0	0	0.166667	0.333333	0	-0.415037	1	1
18337	chr1:35487965-35488259	0	0	0	1	0	0	0.166667	0	0.333333	0.415037	1	1
18338	chr1:35494495-35494717	0	0	1	0	0	0	0.166667	0.333333	0	-0.415037	1	1
18341	chr1:35510608-35510826	1	0	0	3	2	1	1.16667	0.333333	2	1.16993	0.125	1
18343	chr1:35515028-35515768	0	0	0	2	0	1	0.5	0	1	1	0.25	1
18347	chr1:35530381-35530619	0	1	0	0	0	0	0.166667	0.333333	0	-0.415037	1	1
18349	chr1:35532673-35532893	0	0	0	2	0	1	0.5	0	1	1	0.25	1
18350	chr1:35533697-35533944	1	0	0	4	0	2	1.16667	0.333333	2	1.16993	0.263313	1
18352	chr1:35548281-35548506	0	0	0	1	0	0	0.166667	0	0.333333	0.415037	1	1
18359	chr1:35556907-35557125	0	0	0	1	0	0	0.166667	0	0.333333	0.415037	1	1
18364	chr1:35564015-35564432	0	0	0	1	0	0	0.166667	0	0.333333	0.415037	1	1
18378	chr1:35606410-35606634	4	3	4	1	0	1	2.16667	3.66667	0.666667	-1.48543	0.0224609	0.884451
18382	chr1:35614907-35615129	1	0	0	2	1	1	0.833333	0.333333	1.33333	0.807355	0.375	1
18384	chr1:35619563-35620121	0	0	0	1	1	0	0.333333	0	0.666667	0.736966	0.5	1
18393	chr1:35625470-35625556	0	0	0	0	1	0	0.166667	0	0.333333	0.415037	1	1
18397	chr1:35655347-35655476	5	5	2	16	12	9	8.16667	4	12.3333	1.41504	0.000469758	0.0841139
18405	chr1:35659443-35659805	1	0	0	4	0	1	1	0.333333	1.66667	1	0.43436	1
18408	chr1:35664534-35664744	0	1	0	1	1	0	0.5	0.333333	0.666667	0.321928	1	1
18412	chr1:35673197-35673379	0	0	0	2	1	1	0.666667	0	1.33333	1.22239	0.125	1
18417	chr1:35682299-35682549	1	1	0	0	1	0	0.5	0.666667	0.333333	-0.321928	1	1
18423	chr1:35706453-35706679	0	0	0	1	0	0	0.166667	0	0.333333	0.415037	1	1
18425	chr1:35711916-35712136	0	0	0	1	0	1	0.333333	0	0.666667	0.736966	0.5	1
18429	chr1:35714994-35715148	0	2	1	5	2	1	1.83333	1	2.66667	0.874469	0.317778	1
18430	chr1:35719203-35719412	0	2	0	6	2	1	1.83333	0.666667	3	1.26303	0.222329	1
18432	chr1:35722972-35723259	0	0	0	1	0	0	0.166667	0	0.333333	0.415037	1	1
18434	chr1:35726410-35726498	2	2	1	5	3	4	2.83333	1.66667	4	0.906891	0.143463	1
18437	chr1:35728289-35728520	0	0	0	3	1	0	0.666667	0	1.33333	1.22239	0.250526	1
18452	chr1:35759008-35759233	0	0	0	1	1	0	0.333333	0	0.666667	0.736966	0.5	1
18463	chr1:35783753-35783968	3	2	4	0	0	0	1.5	3	0	-2	0.00390625	0.334344
18477	chr1:35812700-35812987	0	1	0	0	0	0	0.166667	0.333333	0	-0.415037	1	1
18480	chr1:35815212-35815355	0	1	1	2	0	0	0.666667	0.666667	0.666667	0	1	1
18488	chr1:35857349-35857566	0	0	0	0	1	0	0.166667	0	0.333333	0.415037	1	1
18495	chr1:35893206-35893464	0	0	0	1	1	0	0.333333	0	0.666667	0.736966	0.5	1
18497	chr1:35895644-35895989	0	0	0	0	1	0	0.166667	0	0.333333	0.415037	1	1
18504	chr1:35922058-35922336	3	2	3	0	0	0	1.33333	2.66667	0	-1.87447	0.0078125	0.500208
18520	chr1:35986644-35987159	0	0	0	1	0	0	0.166667	0	0.333333	0.415037	1	1
18539	chr1:36036423-36036638	5	4	2	4	2	1	3	3.66667	2.33333	-0.485427	0.480682	1
18544	chr1:36043861-36043953	111	87	53	58	63	43	69.1667	83.6667	54.6667	-0.60498	0.106564	1
18546	chr1:36045418-36045735	1	0	1	1	1	1	0.833333	0.666667	1	0.263034	1	1
18548	chr1:36046064-36046300	1	1	0	0	0	0	0.333333	0.666667	0	-0.736966	0.5	1
18551	chr1:36048597-36048720	1	0	1	0	0	0	0.333333	0.666667	0	-0.736966	0.5	1
18562	chr1:36068192-36068447	0	0	0	0	1	0	0.166667	0	0.333333	0.415037	1	1
18564	chr1:36082743-36082962	1	1	0	3	0	0	0.833333	0.666667	1	0.263034	1	1
18565	chr1:36086180-36086253	0	1	1	1	0	1	0.666667	0.666667	0.666667	0	1	1
18567	chr1:36091069-36091287	0	0	0	1	0	0	0.166667	0	0.333333	0.415037	1	1
18573	chr1:36106396-36106715	17	10	6	28	6	5	12	11	13	0.222392	0.842125	1
18575	chr1:36108636-36108925	1	0	0	2	1	0	0.666667	0.333333	1	0.584963	0.625	1
18577	chr1:36112469-36112844	1	0	0	2	0	0	0.5	0.333333	0.666667	0.321928	1	1
18580	chr1:36127834-36128053	3	2	0	4	2	1	2	1.66667	2.33333	0.321928	0.791252	1
18583	chr1:36142920-36143146	2	2	0	3	4	1	2	1.33333	2.66667	0.652077	0.387695	1
18594	chr1:36158597-36158817	1	1	1	3	1	1	1.33333	1	1.66667	0.415037	0.726563	1
18598	chr1:36165483-36165694	25	11	10	39	13	12	18.3333	15.3333	21.3333	0.451379	0.578238	1
18605	chr1:36172355-36172572	0	1	1	3	1	0	1	0.666667	1.33333	0.485427	0.730304	1
18619	chr1:36186144-36186492	1	1	0	1	1	0	0.666667	0.666667	0.666667	0	1	1
18624	chr1:36200910-36201233	1	1	1	0	1	0	0.666667	1	0.333333	-0.584963	0.625	1
18627	chr1:36204495-36204715	0	0	0	1	0	0	0.166667	0	0.333333	0.415037	1	1
18634	chr1:36236230-36236461	0	0	0	2	1	0	0.5	0	1	1	0.25	1
18636	chr1:36236900-36237682	0	0	0	1	0	0	0.166667	0	0.333333	0.415037	1	1
18638	chr1:36239056-36239309	2	1	0	5	2	1	1.83333	1	2.66667	0.874469	0.317778	1
18641	chr1:36252579-36253173	0	0	0	0	0	1	0.166667	0	0.333333	0.415037	1	1
18644	chr1:36257027-36257239	0	0	0	2	1	0	0.5	0	1	1	0.25	1
18646	chr1:36258652-36259036	1	0	0	1	1	0	0.5	0.333333	0.666667	0.321928	1	1
18649	chr1:36265525-36265800	4	3	2	1	1	0	1.83333	3	0.666667	-1.26303	0.0654297	1
18651	chr1:36271153-36271404	1	0	0	1	1	1	0.666667	0.333333	1	0.584963	0.625	1
18665	chr1:36277298-36277505	3	5	4	1	1	0	2.33333	4	0.666667	-1.58496	0.0129395	0.665902
18670	chr1:36280572-36281035	1	1	0	0	0	0	0.333333	0.666667	0	-0.736966	0.5	1
18677	chr1:36295150-36295374	0	0	0	0	1	0	0.166667	0	0.333333	0.415037	1	1
18681	chr1:36296612-36296887	0	0	0	1	0	0	0.166667	0	0.333333	0.415037	1	1
18686	chr1:36310902-36311149	0	0	0	3	2	1	1	0	2	1.58496	0.03125	1
18687	chr1:36318555-36318776	2	1	1	0	0	0	0.666667	1.33333	0	-1.22239	0.125	1
18689	chr1:36326824-36327077	0	0	0	3	1	0	0.666667	0	1.33333	1.22239	0.250526	1
18692	chr1:36334972-36335208	1	0	0	0	1	0	0.333333	0.333333	0.333333	0	1	1
18693	chr1:36337370-36337595	1	0	0	1	1	0	0.5	0.333333	0.666667	0.321928	1	1
18701	chr1:36355717-36355999	0	0	0	1	0	0	0.166667	0	0.333333	0.415037	1	1
18741	chr1:36527857-36527943	0	0	1	1	1	0	0.5	0.333333	0.666667	0.321928	1	1
18746	chr1:36547196-36547410	0	1	1	1	1	0	0.666667	0.666667	0.666667	0	1	1
18772	chr1:36566588-36566930	1	0	0	2	1	0	0.666667	0.333333	1	0.584963	0.625	1
18797	chr1:36607260-36607483	0	0	0	3	2	2	1.16667	0	2.33333	1.73697	0.015625	0.723151
18803	chr1:36611991-36612192	1	1	1	1	0	0	0.666667	1	0.333333	-0.584963	0.625	1
18828	chr1:36660247-36660323	17	47	58	12	17	21	28.6667	40.6667	16.6667	-1.23786	0.0515705	1
18842	chr1:36675671-36675891	1	0	0	0	0	0	0.166667	0.333333	0	-0.415037	1	1
18846	chr1:36680162-36680384	0	0	0	1	0	0	0.166667	0	0.333333	0.415037	1	1
18849	chr1:36681444-36681680	0	0	1	0	0	0	0.166667	0.333333	0	-0.415037	1	1
18856	chr1:36697464-36697741	1	0	0	1	0	1	0.5	0.333333	0.666667	0.321928	1	1
18863	chr1:36717820-36718650	0	0	0	1	0	0	0.166667	0	0.333333	0.415037	1	1
18874	chr1:36747371-36747598	0	0	0	0	1	0	0.166667	0	0.333333	0.415037	1	1
18887	chr1:36776935-36777149	1	0	0	0	1	0	0.333333	0.333333	0.333333	0	1	1
18889	chr1:36777719-36777994	0	0	0	1	0	0	0.166667	0	0.333333	0.415037	1	1
18893	chr1:36779669-36779943	0	0	0	2	0	0	0.333333	0	0.666667	0.736966	0.666667	1
18905	chr1:36804471-36804687	0	0	0	2	1	0	0.5	0	1	1	0.25	1
18936	chr1:36865582-36865798	0	0	0	0	1	0	0.166667	0	0.333333	0.415037	1	1
18941	chr1:36878362-36878709	0	1	0	1	0	0	0.333333	0.333333	0.333333	0	1	1
18943	chr1:36885670-36885943	2	0	0	1	0	0	0.5	0.666667	0.333333	-0.321928	1	1
18954	chr1:36907060-36907276	1	1	0	1	0	1	0.666667	0.666667	0.666667	0	1	1
18957	chr1:36911717-36911938	0	1	0	2	1	1	0.833333	0.333333	1.33333	0.807355	0.375	1
18976	chr1:36953946-36954407	0	1	0	1	1	1	0.666667	0.333333	1	0.584963	0.625	1
18992	chr1:36990858-36991142	0	0	0	6	1	0	1.16667	0	2.33333	1.73697	0.24568	1
19010	chr1:37045552-37045780	0	1	0	2	2	1	1	0.333333	1.66667	1	0.21875	1
19014	chr1:37061508-37061998	1	0	0	1	0	0	0.333333	0.333333	0.333333	0	1	1
19018	chr1:37086392-37086747	1	0	0	0	0	1	0.333333	0.333333	0.333333	0	1	1
19020	chr1:37088072-37088284	1	0	0	1	0	0	0.333333	0.333333	0.333333	0	1	1
19028	chr1:37118764-37118982	2	1	0	4	2	1	1.66667	1	2.33333	0.736966	0.34375	1
19034	chr1:37150171-37150409	1	0	0	1	0	0	0.333333	0.333333	0.333333	0	1	1
19036	chr1:37150628-37150766	2	3	2	4	2	5	3	2.33333	3.66667	0.485427	0.480682	1
19043	chr1:37170396-37170610	2	1	0	4	2	2	1.83333	1	2.66667	0.874469	0.226563	1
19052	chr1:37190679-37190743	2	5	6	6	7	13	6.5	4.33333	8.66667	0.857981	0.106379	1
19077	chr1:37270982-37271461	0	0	0	1	1	0	0.333333	0	0.666667	0.736966	0.5	1
19082	chr1:37288788-37288999	1	1	0	1	0	1	0.666667	0.666667	0.666667	0	1	1
19097	chr1:37357713-37357936	1	2	0	4	2	1	1.66667	1	2.33333	0.736966	0.34375	1
19110	chr1:37428060-37428409	3	1	0	9	1	1	2.5	1.33333	3.66667	1	0.489331	1
19126	chr1:37468373-37468594	2	3	0	8	4	4	3.5	1.66667	5.33333	1.24793	0.0339248	1
19141	chr1:37513433-37514133	1	0	0	0	0	0	0.166667	0.333333	0	-0.415037	1	1
19206	chr1:37867730-37868239	0	0	0	2	0	0	0.333333	0	0.666667	0.736966	0.666667	1
19217	chr1:37925489-37925707	0	0	0	1	0	0	0.166667	0	0.333333	0.415037	1	1
19238	chr1:37962933-37963124	2	1	1	12	2	2	3.33333	1.33333	5.33333	1.44057	0.264937	1
19239	chr1:37970015-37970297	0	0	0	1	0	0	0.166667	0	0.333333	0.415037	1	1
19246	chr1:37982253-37982764	2	1	0	1	0	0	0.666667	1	0.333333	-0.584963	0.625	1
19257	chr1:37995949-37996171	0	0	0	3	1	0	0.666667	0	1.33333	1.22239	0.250526	1
19269	chr1:38021495-38021718	0	0	0	1	0	0	0.166667	0	0.333333	0.415037	1	1
19272	chr1:38029185-38029523	0	0	0	1	0	1	0.333333	0	0.666667	0.736966	0.5	1
19273	chr1:38029524-38029758	1	1	0	1	2	1	1	0.666667	1.33333	0.485427	0.6875	1
19277	chr1:38050277-38050607	0	0	0	1	0	0	0.166667	0	0.333333	0.415037	1	1
19281	chr1:38054999-38055214	0	0	0	1	0	0	0.166667	0	0.333333	0.415037	1	1
19283	chr1:38062883-38063409	1	0	0	0	0	0	0.166667	0.333333	0	-0.415037	1	1
19285	chr1:38067652-38068195	1	0	0	1	1	0	0.5	0.333333	0.666667	0.321928	1	1
19292	chr1:38093070-38093246	0	0	1	0	0	0	0.166667	0.333333	0	-0.415037	1	1
19308	chr1:38111468-38111553	0	1	0	0	0	0	0.166667	0.333333	0	-0.415037	1	1
19331	chr1:38155782-38156129	4	2	1	4	2	1	2.33333	2.33333	2.33333	0	1	1
19332	chr1:38165011-38165516	1	0	0	1	0	1	0.5	0.333333	0.666667	0.321928	1	1
19351	chr1:38201455-38202072	1	0	0	0	0	0	0.166667	0.333333	0	-0.415037	1	1
19370	chr1:38238371-38238582	0	0	0	2	1	0	0.5	0	1	1	0.25	1
19375	chr1:38249266-38249485	1	2	0	3	1	1	1.33333	1	1.66667	0.415037	0.726563	1
19388	chr1:38266920-38267145	0	0	0	1	0	0	0.166667	0	0.333333	0.415037	1	1
19390	chr1:38270343-38270856	0	0	0	1	0	0	0.166667	0	0.333333	0.415037	1	1
19428	chr1:38342645-38342938	0	0	0	1	0	0	0.166667	0	0.333333	0.415037	1	1
19430	chr1:38344645-38344868	0	0	0	1	0	0	0.166667	0	0.333333	0.415037	1	1
19437	chr1:38360327-38360532	1	0	1	0	0	0	0.333333	0.666667	0	-0.736966	0.5	1
19444	chr1:38392667-38392891	14	5	6	4	4	2	5.83333	8.33333	3.33333	-1.10692	0.104975	1
19447	chr1:38393939-38394194	0	0	0	0	1	0	0.166667	0	0.333333	0.415037	1	1
19454	chr1:38401997-38402217	1	0	0	1	1	0	0.5	0.333333	0.666667	0.321928	1	1
19466	chr1:38419026-38419250	1	1	0	4	1	1	1.33333	0.666667	2	0.847997	0.344547	1
19473	chr1:38426416-38426638	0	0	0	1	0	0	0.166667	0	0.333333	0.415037	1	1
19487	chr1:38450573-38450990	0	0	0	0	0	1	0.166667	0	0.333333	0.415037	1	1
19491	chr1:38456135-38456369	10	6	2	18	7	5	8	6	10	0.652077	0.433662	1
19499	chr1:38467864-38468083	4	2	1	4	1	1	2.16667	2.33333	2	-0.152003	1	1
19508	chr1:38483836-38484086	1	0	0	1	1	0	0.5	0.333333	0.666667	0.321928	1	1
19515	chr1:38503694-38504073	2	0	1	8	1	0	2	1	3	1	0.537986	1
19548	chr1:38545684-38545902	0	1	0	3	1	1	1	0.333333	1.66667	1	0.21875	1
19553	chr1:38564686-38564860	1	1	0	2	1	1	1	0.666667	1.33333	0.485427	0.6875	1
19565	chr1:38631422-38631657	0	1	0	7	3	2	2.16667	0.333333	4	1.90689	0.0212632	0.866721
19567	chr1:38633560-38633784	1	1	0	2	0	0	0.666667	0.666667	0.666667	0	1	1
19577	chr1:38696193-38696411	0	2	0	3	1	2	1.33333	0.666667	2	0.847997	0.289063	1
19580	chr1:38717867-38718099	1	1	0	1	1	0	0.666667	0.666667	0.666667	0	1	1
19594	chr1:38784237-38784460	0	1	0	2	0	0	0.5	0.333333	0.666667	0.321928	1	1
19596	chr1:38794403-38794963	1	0	0	1	0	0	0.333333	0.333333	0.333333	0	1	1
19603	chr1:38821572-38821812	1	0	0	0	1	0	0.333333	0.333333	0.333333	0	1	1
19613	chr1:38899402-38900029	0	1	0	0	0	0	0.166667	0.333333	0	-0.415037	1	1
19615	chr1:38901672-38901939	2	1	1	6	2	1	2.16667	1.33333	3	0.777608	0.396363	1
19624	chr1:38950167-38950596	2	0	1	0	1	0	0.666667	1	0.333333	-0.584963	0.625	1
19628	chr1:38979124-38979351	0	0	0	3	2	1	1	0	2	1.58496	0.03125	1
19630	chr1:38986292-38986798	2	0	0	1	0	0	0.5	0.666667	0.333333	-0.321928	1	1
19639	chr1:38998637-38999066	0	0	0	1	0	0	0.166667	0	0.333333	0.415037	1	1
19648	chr1:39036763-39036999	1	1	1	3	1	1	1.33333	1	1.66667	0.415037	0.726563	1
19652	chr1:39063243-39063464	0	1	0	3	1	1	1	0.333333	1.66667	1	0.21875	1
19665	chr1:39083946-39084249	0	0	1	4	0	1	1	0.333333	1.66667	1	0.43436	1
19670	chr1:39093485-39093995	1	0	0	1	0	0	0.333333	0.333333	0.333333	0	1	1
19672	chr1:39109646-39109852	0	1	0	1	0	1	0.5	0.333333	0.666667	0.321928	1	1
19690	chr1:39221714-39222028	1	1	1	5	1	0	1.5	1	2	0.584963	0.673627	1
19694	chr1:39244666-39244883	0	0	0	3	1	0	0.666667	0	1.33333	1.22239	0.250526	1
19705	chr1:39272381-39272603	0	0	0	1	0	0	0.166667	0	0.333333	0.415037	1	1
19722	chr1:39309101-39309316	3	1	2	0	1	1	1.33333	2	0.666667	-0.847997	0.289063	1
19729	chr1:39327449-39327660	0	0	0	2	0	0	0.333333	0	0.666667	0.736966	0.666667	1
19748	chr1:39363090-39363194	3	5	2	6	11	3	5	3.33333	6.66667	0.823122	0.227243	1
19755	chr1:39386372-39386597	0	0	0	1	1	0	0.333333	0	0.666667	0.736966	0.5	1
19761	chr1:39401378-39401931	0	0	0	1	0	0	0.166667	0	0.333333	0.415037	1	1
19763	chr1:39402713-39402933	0	0	0	1	0	0	0.166667	0	0.333333	0.415037	1	1
19770	chr1:39415675-39415967	1	0	0	3	1	1	1	0.333333	1.66667	1	0.21875	1
19772	chr1:39417409-39417926	0	1	0	0	0	0	0.166667	0.333333	0	-0.415037	1	1
19774	chr1:39423333-39423547	1	0	1	1	0	0	0.5	0.666667	0.333333	-0.321928	1	1
19778	chr1:39430635-39430946	0	1	0	1	0	0	0.333333	0.333333	0.333333	0	1	1
19795	chr1:39447571-39447783	1	0	0	0	0	0	0.166667	0.333333	0	-0.415037	1	1
19801	chr1:39454585-39454803	0	0	0	3	1	0	0.666667	0	1.33333	1.22239	0.250526	1
19807	chr1:39474611-39474881	2	0	0	1	1	0	0.666667	0.666667	0.666667	0	1	1
19817	chr1:39484836-39485143	0	0	0	0	1	0	0.166667	0	0.333333	0.415037	1	1
19818	chr1:39495443-39495687	0	0	0	1	0	0	0.166667	0	0.333333	0.415037	1	1
19837	chr1:39530543-39530727	2	1	1	1	1	1	1.16667	1.33333	1	-0.222392	1	1
19846	chr1:39545499-39545711	0	0	0	0	1	0	0.166667	0	0.333333	0.415037	1	1
19850	chr1:39553538-39554297	0	0	0	1	0	0	0.166667	0	0.333333	0.415037	1	1
19852	chr1:39558549-39558847	6	3	2	17	3	2	5.5	3.66667	7.33333	0.836501	0.514018	1
19856	chr1:39567202-39567420	0	0	0	1	0	0	0.166667	0	0.333333	0.415037	1	1
19870	chr1:39584693-39584913	0	0	0	1	1	0	0.333333	0	0.666667	0.736966	0.5	1
19873	chr1:39587214-39587428	0	0	0	1	0	0	0.166667	0	0.333333	0.415037	1	1
19879	chr1:39596607-39596850	0	0	0	1	0	0	0.166667	0	0.333333	0.415037	1	1
19881	chr1:39599806-39600030	0	0	0	0	1	0	0.166667	0	0.333333	0.415037	1	1
19884	chr1:39627077-39627463	1	1	0	1	0	0	0.5	0.666667	0.333333	-0.321928	1	1
19892	chr1:39646671-39647056	0	0	0	1	0	0	0.166667	0	0.333333	0.415037	1	1
19904	chr1:39673046-39673269	0	0	1	1	0	0	0.333333	0.333333	0.333333	0	1	1
19908	chr1:39679097-39679322	4	3	3	3	1	1	2.5	3.33333	1.66667	-0.70044	0.301758	1
19923	chr1:39725388-39725613	0	0	1	1	0	0	0.333333	0.333333	0.333333	0	1	1
19924	chr1:39727720-39727997	1	2	1	2	1	1	1.33333	1.33333	1.33333	0	1	1
19927	chr1:39730439-39730682	0	0	0	1	0	0	0.166667	0	0.333333	0.415037	1	1
19933	chr1:39738902-39739139	0	1	0	4	3	1	1.5	0.333333	2.66667	1.45943	0.0390625	1
19942	chr1:39778202-39778421	1	1	0	3	2	1	1.33333	0.666667	2	0.847997	0.289063	1
19947	chr1:39796567-39797071	0	0	0	3	1	1	0.833333	0	1.66667	1.41504	0.0625	1
19951	chr1:39809494-39809711	2	4	3	2	0	0	1.83333	3	0.666667	-1.26303	0.0654297	1
19959	chr1:39821232-39821448	2	2	1	1	0	0	1	1.66667	0.333333	-1	0.21875	1
19964	chr1:39839603-39839838	2	2	3	2	0	0	1.5	2.33333	0.666667	-1	0.179688	1
19970	chr1:39862936-39863158	0	1	0	9	2	1	2.16667	0.333333	4	1.90689	0.153299	1
19981	chr1:39883312-39883382	0	0	0	2	1	0	0.5	0	1	1	0.25	1
19991	chr1:39916377-39917016	0	0	0	1	0	0	0.166667	0	0.333333	0.415037	1	1
19992	chr1:39919781-39920396	0	0	0	1	0	0	0.166667	0	0.333333	0.415037	1	1
20043	chr1:40008593-40009040	1	0	0	0	0	0	0.166667	0.333333	0	-0.415037	1	1
20054	chr1:40031073-40031424	0	0	0	3	0	0	0.5	0	1	1	0.55	1
20068	chr1:40042781-40042998	5	2	1	0	2	1	1.83333	2.66667	1	-0.874469	0.317778	1
20071	chr1:40045943-40046154	2	0	0	0	0	0	0.333333	0.666667	0	-0.736966	0.666667	1
20074	chr1:40047810-40047922	0	1	0	2	0	1	0.666667	0.333333	1	0.584963	0.625	1
20075	chr1:40051842-40052060	2	1	1	1	0	0	0.833333	1.33333	0.333333	-0.807355	0.375	1
20077	chr1:40052470-40052691	1	0	0	0	0	0	0.166667	0.333333	0	-0.415037	1	1
20078	chr1:40057323-40057594	1	0	0	1	0	0	0.333333	0.333333	0.333333	0	1	1
20080	chr1:40066923-40067144	0	1	0	2	1	0	0.666667	0.333333	1	0.584963	0.625	1
20087	chr1:40072108-40072309	4	3	3	12	3	4	4.83333	3.33333	6.33333	0.758992	0.353299	1
20090	chr1:40072546-40072634	1	1	1	7	4	2	2.66667	1	4.33333	1.41504	0.0340126	1
20094	chr1:40074079-40074301	0	0	0	1	1	0	0.333333	0	0.666667	0.736966	0.5	1
20099	chr1:40078070-40078322	0	0	0	1	0	0	0.166667	0	0.333333	0.415037	1	1
20100	chr1:40078443-40078663	1	1	0	3	1	0	1	0.666667	1.33333	0.485427	0.730304	1
20105	chr1:40087821-40088034	0	0	0	1	2	0	0.5	0	1	1	0.25	1
20113	chr1:40107528-40107750	1	0	0	0	1	0	0.333333	0.333333	0.333333	0	1	1
20125	chr1:40130258-40130698	0	0	0	1	0	0	0.166667	0	0.333333	0.415037	1	1
20133	chr1:40140761-40140835	0	4	4	7	7	8	5	2.66667	7.33333	1.18442	0.0161248	0.741668
20137	chr1:40141810-40142041	0	0	0	1	0	0	0.166667	0	0.333333	0.415037	1	1
20157	chr1:40161286-40161768	1	1	0	2	0	0	0.666667	0.666667	0.666667	0	1	1
20161	chr1:40169443-40169648	0	1	0	0	0	0	0.166667	0.333333	0	-0.415037	1	1
20167	chr1:40191355-40191440	0	0	0	1	1	0	0.333333	0	0.666667	0.736966	0.5	1
20204	chr1:40257998-40258390	1	0	0	0	0	0	0.166667	0.333333	0	-0.415037	1	1
20209	chr1:40267857-40268077	0	0	0	0	1	0	0.166667	0	0.333333	0.415037	1	1
20214	chr1:40277820-40278582	1	0	0	0	0	0	0.166667	0.333333	0	-0.415037	1	1
20224	chr1:40314193-40314419	0	0	0	1	0	0	0.166667	0	0.333333	0.415037	1	1
20234	chr1:40339329-40339611	0	0	0	1	0	0	0.166667	0	0.333333	0.415037	1	1
20246	chr1:40357392-40357609	0	1	0	1	0	0	0.333333	0.333333	0.333333	0	1	1
20273	chr1:40413998-40414196	1	1	0	2	0	1	0.833333	0.666667	1	0.263034	1	1
20286	chr1:40448903-40449172	0	0	0	0	1	0	0.166667	0	0.333333	0.415037	1	1
20287	chr1:40457007-40457226	0	0	0	0	1	0	0.166667	0	0.333333	0.415037	1	1
20292	chr1:40460902-40461241	1	0	0	1	1	1	0.666667	0.333333	1	0.584963	0.625	1
20299	chr1:40488132-40488354	0	1	0	1	1	0	0.5	0.333333	0.666667	0.321928	1	1
20300	chr1:40488497-40488730	1	0	0	0	0	0	0.166667	0.333333	0	-0.415037	1	1
20307	chr1:40504145-40504370	1	1	0	0	0	0	0.333333	0.666667	0	-0.736966	0.5	1
20312	chr1:40509179-40509473	4	4	3	14	3	2	5	3.66667	6.33333	0.652077	0.552831	1
20315	chr1:40510562-40510799	3	2	1	4	2	2	2.33333	2	2.66667	0.289507	0.790527	1
20317	chr1:40511321-40511578	0	0	0	1	0	0	0.166667	0	0.333333	0.415037	1	1
20318	chr1:40511832-40512051	2	2	1	4	1	0	1.66667	1.66667	1.66667	0	1	1
20321	chr1:40513784-40514094	1	0	0	0	1	0	0.333333	0.333333	0.333333	0	1	1
20323	chr1:40517341-40517567	1	0	0	0	0	0	0.166667	0.333333	0	-0.415037	1	1
20330	chr1:40540627-40540852	1	0	1	2	0	0	0.666667	0.666667	0.666667	0	1	1
20340	chr1:40565190-40565600	0	0	0	0	1	1	0.333333	0	0.666667	0.736966	0.5	1
20349	chr1:40585591-40585866	0	1	0	3	1	1	1	0.333333	1.66667	1	0.21875	1
20359	chr1:40607274-40607545	0	1	0	7	3	1	2	0.333333	3.66667	1.80735	0.071062	1
20370	chr1:40634992-40635212	0	0	0	1	1	0	0.333333	0	0.666667	0.736966	0.5	1
20375	chr1:40641026-40641245	0	0	0	2	0	0	0.333333	0	0.666667	0.736966	0.666667	1
20391	chr1:40682853-40683368	1	0	1	0	0	0	0.333333	0.666667	0	-0.736966	0.5	1
20395	chr1:40693379-40694179	0	0	0	1	1	0	0.333333	0	0.666667	0.736966	0.5	1
20398	chr1:40695220-40695488	1	0	1	0	0	0	0.333333	0.666667	0	-0.736966	0.5	1
20409	chr1:40729708-40729930	1	1	0	3	1	1	1.16667	0.666667	1.66667	0.678072	0.453125	1
20414	chr1:40742851-40743066	3	2	2	0	0	0	1.16667	2.33333	0	-1.73697	0.015625	0.723151
20438	chr1:40770833-40771057	0	1	0	1	2	0	0.666667	0.333333	1	0.584963	0.625	1
20461	chr1:40802262-40802525	0	0	0	1	0	0	0.166667	0	0.333333	0.415037	1	1
20462	chr1:40808913-40809136	1	0	0	0	0	0	0.166667	0.333333	0	-0.415037	1	1
20467	chr1:40819134-40819347	1	0	1	2	0	1	0.833333	0.666667	1	0.263034	1	1
20471	chr1:40820549-40820833	0	1	0	1	0	0	0.333333	0.333333	0.333333	0	1	1
20477	chr1:40841716-40841944	2	1	1	1	1	1	1.16667	1.33333	1	-0.222392	1	1
20479	chr1:40845312-40845570	3	3	1	8	3	2	3.33333	2.33333	4.33333	0.678072	0.399768	1
20481	chr1:40846295-40846512	1	1	0	2	1	1	1	0.666667	1.33333	0.485427	0.6875	1
20483	chr1:40849662-40849898	5	5	1	38	12	11	12	3.66667	20.3333	2.19265	0.0434903	1
20484	chr1:40858471-40858698	2	1	0	6	0	2	1.83333	1	2.66667	0.874469	0.482223	1
20512	chr1:40953351-40953643	1	0	0	0	0	0	0.166667	0.333333	0	-0.415037	1	1
[truncated: 79,827 more rows]

## Sheet: Colon_Tumor
ampID	position	369_normalcolon	544_normalcolon	557_normalcolon	369_Tumor	544_Tumor	557_Tumor	baseMean	baseMeanA	baseMeanB	log2FoldChange2	pval_pooled	padj_pooled
90	chr1:532834-533049	8	2	1	7	9	5	5.33333	3.66667	7	0.777608	0.223332	0.888084
102	chr1:548432-548707	0	0	0	0	0	1	0.166667	0	0.333333	0.415037	1	1
105	chr1:553796-554017	0	1	0	0	0	0	0.166667	0.333333	0	-0.415037	1	1
115	chr1:647699-647916	0	0	0	0	1	0	0.166667	0	0.333333	0.415037	1	1
135	chr1:713050-713269	1	0	0	0	0	0	0.166667	0.333333	0	-0.415037	1	1
141	chr1:714699-714925	2	0	0	0	0	1	0.5	0.666667	0.333333	-0.321928	1	1
155	chr1:788436-788687	0	0	0	0	0	1	0.166667	0	0.333333	0.415037	1	1
165	chr1:818435-818753	2	0	1	0	5	3	1.83333	1	2.66667	0.874469	0.397662	1
173	chr1:830684-830922	1	0	1	3	0	1	1	0.666667	1.33333	0.485427	0.730304	1
175	chr1:834500-835047	0	0	0	0	2	0	0.333333	0	0.666667	0.736966	0.666667	1
178	chr1:837868-838078	10	5	2	5	7	9	6.33333	5.66667	7	0.263034	0.702226	1
294	chr1:893542-894175	1	0	0	2	2	1	1	0.333333	1.66667	1	0.21875	0.888084
388	chr1:920356-920565	11	5	4	11	20	10	10.1667	6.66667	13.6667	0.93587	0.0805202	0.576771
392	chr1:921563-921903	2	0	0	2	2	2	1.33333	0.666667	2	0.847997	0.289063	0.956563
394	chr1:923133-923351	3	1	1	2	0	0	1.16667	1.66667	0.666667	-0.678072	0.484103	1
398	chr1:927633-927860	0	1	0	2	0	2	0.833333	0.333333	1.33333	0.807355	0.375	1
417	chr1:937878-938004	1	1	1	2	4	3	2	1	3	1	0.145996	0.752386
422	chr1:942541-942893	2	0	0	5	1	2	1.66667	0.666667	2.66667	1.1375	0.22025	0.888084
424	chr1:943236-943581	0	0	0	1	2	1	0.666667	0	1.33333	1.22239	0.125	0.682582
426	chr1:944301-944579	3	0	0	9	2	4	3	1	5	1.58496	0.0964291	0.646353
428	chr1:945258-945855	3	1	1	2	1	1	1.5	1.66667	1.33333	-0.192645	1	1
489	chr1:992844-993392	3	1	0	2	2	0	1.33333	1.33333	1.33333	0	1	1
496	chr1:995568-996345	0	0	0	1	0	0	0.166667	0	0.333333	0.415037	1	1
498	chr1:996448-996661	3	1	1	1	0	2	1.33333	1.66667	1	-0.415037	0.726563	1
573	chr1:1055922-1056208	4	0	0	4	6	2	2.66667	1.33333	4	1.09954	0.180764	0.859094
636	chr1:1094409-1094631	21	8	5	20	17	12	13.8333	11.3333	16.3333	0.490986	0.391532	1
687	chr1:1125901-1126051	2	1	1	5	6	0	2.5	1.33333	3.66667	1	0.287444	0.956563
689	chr1:1126299-1126510	1	0	0	0	0	3	0.666667	0.333333	1	0.584963	0.775401	1
709	chr1:1144912-1145410	1	0	0	0	0	0	0.166667	0.333333	0	-0.415037	1	1
773	chr1:1197331-1197609	2	0	0	1	0	0	0.5	0.666667	0.333333	-0.321928	1	1
777	chr1:1201101-1201327	2	0	1	1	0	0	0.666667	1	0.333333	-0.584963	0.625	1
795	chr1:1214876-1215093	1	1	1	2	1	2	1.33333	1	1.66667	0.415037	0.726563	1
796	chr1:1215413-1215768	0	1	0	0	1	1	0.5	0.333333	0.666667	0.321928	1	1
833	chr1:1251712-1251890	0	0	0	1	1	0	0.333333	0	0.666667	0.736966	0.5	1
835	chr1:1252016-1252228	0	0	0	1	0	0	0.166667	0	0.333333	0.415037	1	1
837	chr1:1253737-1253962	12	8	6	20	18	9	12.1667	8.66667	15.6667	0.785875	0.0784362	0.565257
896	chr1:1292894-1293114	27	8	7	13	20	11	14.3333	14	14.6667	0.0627358	0.962783	1
900	chr1:1297862-1298085	3	1	1	3	1	5	2.33333	1.66667	3	0.584963	0.455094	1
902	chr1:1299374-1299716	2	1	1	0	3	2	1.5	1.33333	1.66667	0.192645	1	1
904	chr1:1304630-1304846	2	0	0	0	0	3	0.833333	0.666667	1	0.263034	1	1
915	chr1:1313660-1313998	0	1	0	4	1	1	1.16667	0.333333	2	1.16993	0.199803	0.888084
935	chr1:1338067-1338433	3	0	0	3	1	2	1.5	1	2	0.584963	0.56862	1
939	chr1:1341436-1341655	16	8	3	21	11	3	10.3333	9	11.6667	0.341037	0.721798	1
947	chr1:1344388-1344454	1	1	2	2	0	3	1.5	1.33333	1.66667	0.192645	1	1
949	chr1:1344532-1344732	3	0	0	1	1	1	1	1	1	0	1	1
953	chr1:1352137-1352356	1	0	0	0	3	4	1.33333	0.333333	2.33333	1.32193	0.170281	0.843052
964	chr1:1359255-1359349	0	0	0	0	3	0	0.5	0	1	1	0.55	1
990	chr1:1383199-1383423	1	2	0	0	2	0	0.833333	1	0.666667	-0.263034	1	1
993	chr1:1386514-1386728	15	5	2	11	10	5	8	7.33333	8.66667	0.214125	0.82035	1
1000	chr1:1388676-1389335	1	1	1	1	0	1	0.833333	1	0.666667	-0.263034	1	1
1040	chr1:1418299-1418599	0	0	0	0	0	1	0.166667	0	0.333333	0.415037	1	1
1056	chr1:1428027-1428243	1	0	0	0	1	2	0.666667	0.333333	1	0.584963	0.625	1
1069	chr1:1435371-1435636	2	1	0	0	1	1	0.833333	1	0.666667	-0.263034	1	1
1073	chr1:1436728-1437195	1	1	1	1	1	1	1	1	1	0	1	1
1076	chr1:1437985-1438267	1	0	1	0	5	0	1.16667	0.666667	1.66667	0.678072	0.719239	1
1115	chr1:1463433-1463514	0	0	0	1	0	0	0.166667	0	0.333333	0.415037	1	1
1156	chr1:1488772-1489095	0	0	0	0	0	1	0.166667	0	0.333333	0.415037	1	1
1160	chr1:1492495-1493102	1	0	0	0	1	0	0.333333	0.333333	0.333333	0	1	1
1165	chr1:1500431-1500677	1	0	0	0	0	0	0.166667	0.333333	0	-0.415037	1	1
1167	chr1:1503811-1503908	0	0	0	0	2	0	0.333333	0	0.666667	0.736966	0.666667	1
1172	chr1:1507268-1507488	1	0	0	2	0	0	0.5	0.333333	0.666667	0.321928	1	1
1175	chr1:1511056-1511299	6	6	3	9	9	4	6.16667	5	7.33333	0.473931	0.324009	1
1181	chr1:1520022-1520239	6	1	2	9	5	2	4.16667	3	5.33333	0.662965	0.433429	1
1183	chr1:1520778-1521155	2	0	0	6	1	1	1.66667	0.666667	2.66667	1.1375	0.355752	1
1185	chr1:1521945-1522158	3	1	1	2	1	1	1.5	1.66667	1.33333	-0.192645	1	1
1188	chr1:1522864-1523220	1	0	0	0	0	2	0.5	0.333333	0.666667	0.321928	1	1
1189	chr1:1523221-1523446	1	2	0	4	0	9	2.66667	1	4.33333	1.41504	0.250997	0.888084
1191	chr1:1523616-1524469	0	0	0	0	1	0	0.166667	0	0.333333	0.415037	1	1
1194	chr1:1526731-1527054	1	1	1	1	1	2	1.16667	1	1.33333	0.222392	1	1
1260	chr1:1587008-1587261	5	2	1	9	7	8	5.33333	2.66667	8	1.29546	0.00700037	0.145108
1269	chr1:1591102-1591454	3	1	0	1	2	1	1.33333	1.33333	1.33333	0	1	1
1271	chr1:1592169-1592946	0	0	0	0	1	0	0.166667	0	0.333333	0.415037	1	1
1281	chr1:1604524-1605033	1	0	0	1	0	0	0.333333	0.333333	0.333333	0	1	1
1293	chr1:1610974-1611490	1	2	0	1	1	0	0.833333	1	0.666667	-0.263034	1	1
1344	chr1:1643249-1643493	1	0	0	0	0	0	0.166667	0.333333	0	-0.415037	1	1
1354	chr1:1656391-1656743	2	1	0	1	0	0	0.666667	1	0.333333	-0.584963	0.625	1
1397	chr1:1697683-1697769	0	0	0	0	0	1	0.166667	0	0.333333	0.415037	1	1
1400	chr1:1698447-1698750	2	0	0	1	0	0	0.5	0.666667	0.333333	-0.321928	1	1
1401	chr1:1707592-1708136	3	0	0	1	1	0	0.833333	1	0.666667	-0.263034	1	1
1412	chr1:1716096-1716185	11	9	4	24	7	18	12.1667	8	16.3333	0.945552	0.133545	0.710383
1420	chr1:1736281-1736525	2	1	0	6	11	2	3.66667	1	6.33333	1.87447	0.0437069	0.420207
1435	chr1:1756105-1756453	3	1	0	3	0	0	1.16667	1.33333	1	-0.222392	1	1
1452	chr1:1791606-1792471	0	1	0	0	0	0	0.166667	0.333333	0	-0.415037	1	1
1458	chr1:1796317-1796625	4	0	1	1	1	0	1.16667	1.66667	0.666667	-0.678072	0.605225	1
1464	chr1:1799708-1799923	0	1	0	0	0	1	0.333333	0.333333	0.333333	0	1	1
1465	chr1:1811743-1811949	6	5	2	3	2	10	4.66667	4.33333	5	0.169925	0.906238	1
1468	chr1:1816215-1816450	2	1	1	1	1	1	1.16667	1.33333	1	-0.222392	1	1
1474	chr1:1818238-1818460	4	5	0	5	7	0	3.5	3	4	0.321928	0.800674	1
1476	chr1:1819148-1819223	0	1	0	1	0	1	0.5	0.333333	0.666667	0.321928	1	1
1493	chr1:1828425-1828824	4	0	1	7	6	1	3.16667	1.66667	4.66667	1.08746	0.223291	0.888084
1500	chr1:1834230-1834315	0	0	0	0	0	1	0.166667	0	0.333333	0.415037	1	1
1502	chr1:1835049-1835277	0	0	0	0	1	0	0.166667	0	0.333333	0.415037	1	1
1541	chr1:1872250-1872476	1	1	0	1	0	1	0.666667	0.666667	0.666667	0	1	1
1549	chr1:1876448-1876670	7	1	0	3	9	3	3.83333	2.66667	5	0.710493	0.506073	1
1559	chr1:1880691-1880952	3	1	1	2	3	2	2	1.66667	2.33333	0.321928	0.774414	1
1587	chr1:1903775-1904209	0	0	0	1	0	0	0.166667	0	0.333333	0.415037	1	1
1612	chr1:1922873-1922966	3	1	1	3	6	3	2.83333	1.66667	4	0.906891	0.143463	0.747494
1614	chr1:1925102-1925345	0	0	0	0	1	0	0.166667	0	0.333333	0.415037	1	1
1616	chr1:1926721-1926855	1	0	0	1	0	0	0.333333	0.333333	0.333333	0	1	1
1618	chr1:1927052-1927271	0	0	0	3	0	2	0.833333	0	1.66667	1.41504	0.113277	0.682582
1624	chr1:1936092-1936316	9	1	2	10	2	9	5.5	4	7	0.678072	0.457497	1
1626	chr1:1939160-1939372	7	2	2	8	1	0	3.33333	3.66667	3	-0.222392	0.915482	1
1628	chr1:1939968-1940188	5	1	1	5	2	1	2.5	2.33333	2.66667	0.137504	1	1
1630	chr1:1944170-1944438	1	1	1	1	0	0	0.666667	1	0.333333	-0.584963	0.625	1
1649	chr1:1957973-1958198	3	2	1	7	8	4	4.16667	2	6.33333	1.28951	0.0146333	0.226021
1661	chr1:1966260-1966498	3	3	1	10	16	11	7.33333	2.33333	12.3333	2	5.29959e-06	0.000790078
1666	chr1:1971819-1972039	2	1	1	5	14	6	4.83333	1.33333	8.33333	2	0.0118886	0.198118
1706	chr1:1996928-1997042	0	1	0	0	1	0	0.333333	0.333333	0.333333	0	1	1
1729	chr1:2018615-2019004	1	0	0	0	0	0	0.166667	0.333333	0	-0.415037	1	1
1760	chr1:2045888-2046137	0	0	0	1	1	0	0.333333	0	0.666667	0.736966	0.5	1
1775	chr1:2070740-2070952	2	1	0	1	1	2	1.16667	1	1.33333	0.222392	1	1
1794	chr1:2094999-2095262	0	0	0	1	0	0	0.166667	0	0.333333	0.415037	1	1
1813	chr1:2120148-2120368	1	1	0	2	3	3	1.66667	0.666667	2.66667	1.1375	0.109375	0.682582
1819	chr1:2122889-2123104	2	0	0	1	0	0	0.5	0.666667	0.333333	-0.321928	1	1
1892	chr1:2172925-2173181	0	0	0	0	0	1	0.166667	0	0.333333	0.415037	1	1
1894	chr1:2175498-2175717	0	0	0	1	0	0	0.166667	0	0.333333	0.415037	1	1
1920	chr1:2207045-2207260	2	2	1	0	0	1	1	1.66667	0.333333	-1	0.21875	0.888084
1933	chr1:2219521-2219872	1	0	0	2	0	0	0.5	0.333333	0.666667	0.321928	1	1
2020	chr1:2293364-2293595	2	1	0	1	1	1	1	1	1	0	1	1
2069	chr1:2342768-2342990	1	1	0	0	0	1	0.5	0.666667	0.333333	-0.321928	1	1
2081	chr1:2352477-2352847	1	0	0	2	3	0	1	0.333333	1.66667	1	0.288983	0.956563
2276	chr1:2510809-2511131	3	0	1	0	2	0	1	1.33333	0.666667	-0.485427	0.772797	1
2319	chr1:2548475-2548790	0	0	0	0	0	1	0.166667	0	0.333333	0.415037	1	1
2373	chr1:2695960-2696299	6	1	1	10	6	4	4.66667	2.66667	6.66667	1.06413	0.12583	0.685652
2760	chr1:3117000-3117217	2	2	0	5	4	6	3.16667	1.33333	5	1.36257	0.0192108	0.267096
2900	chr1:3260291-3260602	4	0	1	1	3	4	2.16667	1.66667	2.66667	0.459432	0.658769	1
2951	chr1:3307493-3307714	1	1	1	5	0	1	1.5	1	2	0.584963	0.673627	1
3021	chr1:3360139-3360429	4	1	1	6	6	4	3.66667	2	5.33333	1.078	0.0524788	0.47866
3057	chr1:3402203-3402420	0	0	0	0	1	0	0.166667	0	0.333333	0.415037	1	1
3133	chr1:3476086-3476499	0	0	0	0	2	1	0.5	0	1	1	0.25	0.888084
3238	chr1:3576339-3576552	2	1	2	0	1	2	1.33333	1.66667	1	-0.415037	0.726563	1
3331	chr1:3674846-3675152	1	1	0	3	4	1	1.66667	0.666667	2.66667	1.1375	0.109375	0.682582
3360	chr1:3709118-3709325	0	1	0	1	0	0	0.333333	0.333333	0.333333	0	1	1
3363	chr1:3710021-3710683	0	0	0	1	1	1	0.5	0	1	1	0.25	0.888084
3365	chr1:3711320-3711542	2	1	0	0	2	1	1	1	1	0	1	1
3374	chr1:3727172-3727395	2	1	0	0	1	0	0.666667	1	0.333333	-0.584963	0.625	1
3376	chr1:3729045-3729328	1	1	0	0	0	1	0.5	0.666667	0.333333	-0.321928	1	1
3379	chr1:3729908-3730130	0	0	0	1	1	0	0.333333	0	0.666667	0.736966	0.5	1
3383	chr1:3732346-3732738	3	0	0	1	0	0	0.666667	1	0.333333	-0.584963	0.775401	1
3391	chr1:3740744-3741067	1	0	0	1	0	0	0.333333	0.333333	0.333333	0	1	1
3399	chr1:3756894-3757436	1	1	0	0	0	0	0.333333	0.666667	0	-0.736966	0.5	1
3407	chr1:3764492-3764632	0	0	1	3	0	0	0.666667	0.333333	1	0.584963	0.775401	1
3408	chr1:3764802-3765020	0	0	0	0	0	2	0.333333	0	0.666667	0.736966	0.666667	1
3412	chr1:3772684-3772870	15	11	7	13	18	7	11.8333	11	12.6667	0.187627	0.735309	1
3462	chr1:3814543-3814996	0	1	0	0	0	0	0.166667	0.333333	0	-0.415037	1	1
3468	chr1:3818543-3818763	0	1	0	5	9	6	3.5	0.333333	6.66667	2.52356	2.09808e-05	0.00224541
3479	chr1:3830509-3831410	1	0	0	0	0	0	0.166667	0.333333	0	-0.415037	1	1
3498	chr1:4022612-4023426	1	0	0	0	0	0	0.166667	0.333333	0	-0.415037	1	1
3511	chr1:4048944-4049029	0	1	1	0	2	0	0.666667	0.666667	0.666667	0	1	1
3515	chr1:4059251-4060024	0	0	0	0	1	0	0.166667	0	0.333333	0.415037	1	1
3533	chr1:4114513-4114583	5	3	8	13	27	32	14.6667	5.33333	24	1.98089	0.000742752	0.0309616
3551	chr1:4155255-4155546	0	0	0	1	2	0	0.5	0	1	1	0.25	0.888084
3570	chr1:4221061-4221283	1	0	0	2	1	5	1.5	0.333333	2.66667	1.45943	0.0955177	0.644079
3584	chr1:4255876-4256085	8	1	2	13	17	7	8	3.66667	12.3333	1.51457	0.0170784	0.245669
3586	chr1:4271126-4271373	1	1	0	2	2	0	1	0.666667	1.33333	0.485427	0.6875	1
3591	chr1:4279462-4279679	1	0	0	2	7	6	2.66667	0.333333	5	2.16993	0.00255948	0.0715809
3594	chr1:4287191-4287439	3	1	0	4	5	3	2.66667	1.33333	4	1.09954	0.0768127	0.556731
3596	chr1:4290328-4290639	1	0	0	0	0	2	0.5	0.333333	0.666667	0.321928	1	1
3597	chr1:4313525-4313792	0	0	0	2	1	1	0.666667	0	1.33333	1.22239	0.125	0.682582
3606	chr1:4334390-4334673	4	0	0	6	7	4	3.5	1.33333	5.66667	1.51457	0.0100777	0.182071
3624	chr1:4412008-4412509	0	0	0	4	1	2	1.16667	0	2.33333	1.73697	0.015625	0.229633
3642	chr1:4467470-4467706	1	0	0	2	3	0	1	0.333333	1.66667	1	0.288983	0.956563
3655	chr1:4557814-4558322	1	0	0	0	1	0	0.333333	0.333333	0.333333	0	1	1
3678	chr1:4615105-4615649	0	0	0	0	1	0	0.166667	0	0.333333	0.415037	1	1
3681	chr1:4623160-4623445	1	0	0	0	2	1	0.666667	0.333333	1	0.584963	0.625	1
3697	chr1:4678847-4679095	1	1	0	1	1	1	0.833333	0.666667	1	0.263034	1	1
3733	chr1:4748509-4748756	1	1	0	1	1	2	1	0.666667	1.33333	0.485427	0.6875	1
3832	chr1:5056501-5056909	2	1	1	0	5	1	1.66667	1.33333	2	0.36257	0.836766	1
3833	chr1:5078409-5078748	2	1	0	3	1	0	1.16667	1	1.33333	0.222392	1	1
3839	chr1:5148089-5148360	0	0	0	0	5	0	0.833333	0	1.66667	1.41504	0.438317	1
3844	chr1:5162509-5162731	0	0	0	2	0	0	0.333333	0	0.666667	0.736966	0.666667	1
3848	chr1:5194769-5195065	1	0	0	2	1	0	0.666667	0.333333	1	0.584963	0.625	1
3853	chr1:5219425-5219912	1	0	0	1	0	1	0.5	0.333333	0.666667	0.321928	1	1
3868	chr1:5284460-5284665	11	6	2	19	13	19	11.6667	6.33333	17	1.29546	0.00130335	0.0462496
3875	chr1:5322716-5322942	6	1	1	13	11	6	6.33333	2.66667	10	1.58496	0.00638901	0.135985
3887	chr1:5340011-5340646	0	0	0	1	1	0	0.333333	0	0.666667	0.736966	0.5	1
3891	chr1:5355548-5355847	2	0	0	0	0	1	0.5	0.666667	0.333333	-0.321928	1	1
3900	chr1:5405202-5405422	2	0	1	1	9	2	2.5	1	4	1.32193	0.297309	0.980111
3902	chr1:5408615-5408834	3	1	1	1	8	1	2.5	1.66667	3.33333	0.70044	0.594296	1
3903	chr1:5411783-5412017	0	0	0	1	2	0	0.5	0	1	1	0.25	0.888084
3906	chr1:5432746-5433080	0	0	0	0	1	4	0.833333	0	1.66667	1.41504	0.251121	0.888084
3909	chr1:5443838-5444063	11	5	2	13	15	12	9.66667	6	13.3333	1.03395	0.0111155	0.193252
3931	chr1:5525019-5525196	0	1	0	0	1	0	0.333333	0.333333	0.333333	0	1	1
3961	chr1:5583321-5583552	3	1	0	5	4	2	2.5	1.33333	3.66667	1	0.118469	0.682582
3966	chr1:5617912-5618165	0	0	0	1	1	0	0.333333	0	0.666667	0.736966	0.5	1
3967	chr1:5623306-5623343	0	0	0	1	0	0	0.166667	0	0.333333	0.415037	1	1
3972	chr1:5652631-5652848	1	1	1	1	5	1	1.66667	1	2.33333	0.736966	0.457952	1
3977	chr1:5656209-5656432	2	2	0	4	6	4	3	1.33333	4.66667	1.28011	0.0308838	0.347026
4002	chr1:5726649-5726921	4	2	1	12	6	3	4.66667	2.33333	7	1.26303	0.111867	0.682582
4013	chr1:5757926-5758033	13	12	3	13	54	4	16.5	9.33333	23.6667	1.25526	0.376006	1
4018	chr1:5763971-5764220	2	1	0	1	2	1	1.16667	1	1.33333	0.222392	1	1
4059	chr1:5830191-5830573	1	0	0	1	2	2	1	0.333333	1.66667	1	0.21875	0.888084
4066	chr1:5844296-5844486	2	0	0	6	9	6	3.83333	0.666667	7	2.26303	6.6042e-05	0.00546689
4073	chr1:5871522-5872263	1	0	0	0	0	1	0.333333	0.333333	0.333333	0	1	1
4197	chr1:6068385-6068605	1	0	0	1	0	2	0.666667	0.333333	1	0.584963	0.625	1
4216	chr1:6098028-6098250	3	3	0	1	2	2	1.83333	2	1.66667	-0.169925	1	1
4227	chr1:6121904-6122298	0	0	0	1	0	0	0.166667	0	0.333333	0.415037	1	1
4286	chr1:6174631-6174998	1	0	0	1	2	0	0.666667	0.333333	1	0.584963	0.625	1
4288	chr1:6180699-6180887	0	0	0	1	3	1	0.833333	0	1.66667	1.41504	0.0625	0.515357
4321	chr1:6218133-6218991	0	1	0	0	0	0	0.166667	0.333333	0	-0.415037	1	1
4352	chr1:6242220-6242440	4	1	0	5	0	1	1.83333	1.66667	2	0.169925	1	1
4353	chr1:6246937-6247598	0	1	0	1	0	0	0.333333	0.333333	0.333333	0	1	1
4356	chr1:6248939-6249436	0	0	0	0	2	1	0.5	0	1	1	0.25	0.888084
4376	chr1:6288496-6288787	0	0	0	1	0	0	0.166667	0	0.333333	0.415037	1	1
4377	chr1:6288788-6289017	1	0	0	1	0	1	0.5	0.333333	0.666667	0.321928	1	1
4380	chr1:6289555-6289643	0	0	0	0	0	1	0.166667	0	0.333333	0.415037	1	1
4388	chr1:6296935-6297149	5	1	2	5	1	5	3.16667	2.66667	3.66667	0.347923	0.712801	1
4408	chr1:6315352-6316025	1	0	0	2	1	1	0.833333	0.333333	1.33333	0.807355	0.375	1
4433	chr1:6335629-6335701	2	0	1	9	1	3	2.66667	1	4.33333	1.41504	0.213299	0.888084
4442	chr1:6344474-6344560	2	1	1	2	0	6	2	1.33333	2.66667	0.652077	0.58638	1
4449	chr1:6358288-6358984	1	1	0	2	0	0	0.666667	0.666667	0.666667	0	1	1
4457	chr1:6381668-6381873	1	0	0	0	0	0	0.166667	0.333333	0	-0.415037	1	1
4460	chr1:6385164-6385382	0	0	0	1	0	0	0.166667	0	0.333333	0.415037	1	1
4463	chr1:6387927-6388147	0	0	0	2	1	1	0.666667	0	1.33333	1.22239	0.125	0.682582
4476	chr1:6401514-6401726	0	0	0	1	0	0	0.166667	0	0.333333	0.415037	1	1
4496	chr1:6425531-6425752	1	0	0	1	0	0	0.333333	0.333333	0.333333	0	1	1
4498	chr1:6426048-6426295	0	0	0	0	0	1	0.166667	0	0.333333	0.415037	1	1
4503	chr1:6435807-6435922	0	0	0	0	0	1	0.166667	0	0.333333	0.415037	1	1
4507	chr1:6439049-6439473	1	1	0	2	0	0	0.666667	0.666667	0.666667	0	1	1
4508	chr1:6441897-6442122	1	0	0	3	2	0	1	0.333333	1.66667	1	0.288983	0.956563
4511	chr1:6443341-6443562	0	0	0	1	2	0	0.5	0	1	1	0.25	0.888084
4513	chr1:6443858-6444081	2	1	0	0	1	0	0.666667	1	0.333333	-0.584963	0.625	1
4517	chr1:6448262-6448485	0	1	0	2	0	1	0.666667	0.333333	1	0.584963	0.625	1
4529	chr1:6458623-6458842	1	1	0	1	2	2	1.16667	0.666667	1.66667	0.678072	0.453125	1
4530	chr1:6464447-6464692	5	2	2	4	5	7	4.16667	3	5.33333	0.662965	0.229523	0.888084
4558	chr1:6499777-6499993	5	1	2	4	7	6	4.16667	2.66667	5.66667	0.862496	0.107752	0.682582
4605	chr1:6538797-6539009	0	1	0	2	9	3	2.5	0.333333	4.66667	2.08746	0.0434649	0.418391
4635	chr1:6563561-6563779	1	2	1	12	11	0	4.5	1.33333	7.66667	1.89308	0.0947547	0.644079
4637	chr1:6564723-6565631	2	0	0	0	1	0	0.5	0.666667	0.333333	-0.321928	1	1
4645	chr1:6576421-6576641	3	1	1	7	2	5	3.16667	1.66667	4.66667	1.08746	0.0914114	0.632892
4651	chr1:6583342-6583563	1	0	0	1	0	1	0.5	0.333333	0.666667	0.321928	1	1
4659	chr1:6598388-6598956	2	0	1	2	5	0	1.66667	1	2.33333	0.736966	0.531396	1
4662	chr1:6600139-6600494	0	1	0	0	0	0	0.166667	0.333333	0	-0.415037	1	1
4668	chr1:6610185-6610461	0	1	0	0	0	0	0.166667	0.333333	0	-0.415037	1	1
4669	chr1:6611698-6612019	1	0	0	0	0	0	0.166667	0.333333	0	-0.415037	1	1
4672	chr1:6612965-6613186	2	1	1	2	1	2	1.5	1.33333	1.66667	0.192645	1	1
4673	chr1:6613603-6613826	15	5	4	7	9	4	7.33333	8	6.66667	-0.231326	0.794689	1
4677	chr1:6616773-6617043	2	0	0	0	1	1	0.666667	0.666667	0.666667	0	1	1
4681	chr1:6627323-6627544	0	0	0	1	4	1	1	0	2	1.58496	0.0746606	0.548271
4685	chr1:6628164-6628439	0	1	0	0	0	1	0.333333	0.333333	0.333333	0	1	1
4688	chr1:6633816-6634031	1	0	0	1	2	3	1.16667	0.333333	2	1.16993	0.125	0.682582
4708	chr1:6655962-6656383	3	1	1	3	1	1	1.66667	1.66667	1.66667	0	1	1
4720	chr1:6665439-6665620	4	3	2	15	2	1	4.5	3	6	0.807355	0.571148	1
4724	chr1:6669202-6669319	0	0	0	1	0	0	0.166667	0	0.333333	0.415037	1	1
4726	chr1:6670307-6670674	1	0	0	0	0	0	0.166667	0.333333	0	-0.415037	1	1
4728	chr1:6671388-6671694	4	0	0	2	2	1	1.5	1.33333	1.66667	0.192645	1	1
4731	chr1:6672306-6672533	4	2	1	4	1	3	2.5	2.33333	2.66667	0.137504	1	1
4745	chr1:6677240-6677801	5	1	0	2	2	2	2	2	2	0	1	1
4747	chr1:6679493-6679872	0	0	0	1	0	1	0.333333	0	0.666667	0.736966	0.5	1
4757	chr1:6691390-6692031	1	0	0	2	0	1	0.666667	0.333333	1	0.584963	0.625	1
4768	chr1:6708309-6708680	1	1	0	1	0	0	0.5	0.666667	0.333333	-0.321928	1	1
4770	chr1:6709146-6709931	0	0	0	1	0	0	0.166667	0	0.333333	0.415037	1	1
4776	chr1:6731396-6731895	0	0	0	0	0	1	0.166667	0	0.333333	0.415037	1	1
4777	chr1:6732755-6733321	0	0	1	1	0	0	0.333333	0.333333	0.333333	0	1	1
4782	chr1:6747510-6747965	0	1	0	1	0	0	0.333333	0.333333	0.333333	0	1	1
4788	chr1:6753537-6754218	1	0	0	0	0	0	0.166667	0.333333	0	-0.415037	1	1
4796	chr1:6762290-6762360	2	3	3	2	2	3	2.5	2.66667	2.33333	-0.137504	1	1
4804	chr1:6772889-6773255	1	0	0	0	0	1	0.333333	0.333333	0.333333	0	1	1
4807	chr1:6774313-6774543	0	0	0	1	0	0	0.166667	0	0.333333	0.415037	1	1
4812	chr1:6780667-6780900	1	0	0	1	0	1	0.5	0.333333	0.666667	0.321928	1	1
4820	chr1:6788414-6788630	2	2	1	15	15	4	6.5	1.66667	11.3333	2.20945	0.00515048	0.117121
4822	chr1:6792585-6793087	1	0	0	0	0	0	0.166667	0.333333	0	-0.415037	1	1
4823	chr1:6795384-6795626	4	6	1	3	2	1	2.83333	3.66667	2	-0.63743	0.395038	1
4827	chr1:6797269-6797903	0	0	0	1	0	1	0.333333	0	0.666667	0.736966	0.5	1
4833	chr1:6805055-6805265	1	1	0	1	2	4	1.5	0.666667	2.33333	1	0.179688	0.856021
4838	chr1:6812039-6812553	1	0	0	0	1	1	0.5	0.333333	0.666667	0.321928	1	1
4842	chr1:6822860-6823163	1	1	0	0	0	0	0.333333	0.666667	0	-0.736966	0.5	1
4851	chr1:6841339-6841552	1	0	0	1	0	2	0.666667	0.333333	1	0.584963	0.625	1
4870	chr1:6888445-6888720	1	0	0	0	0	0	0.166667	0.333333	0	-0.415037	1	1
4875	chr1:6897107-6897327	1	0	0	1	0	0	0.333333	0.333333	0.333333	0	1	1
4882	chr1:6920674-6920896	1	0	0	0	0	0	0.166667	0.333333	0	-0.415037	1	1
4884	chr1:6921118-6921421	7	0	1	4	0	3	2.5	2.66667	2.33333	-0.137504	1	1
4886	chr1:6922116-6922428	2	0	1	1	0	0	0.666667	1	0.333333	-0.584963	0.625	1
4888	chr1:6943050-6943532	0	0	0	0	0	1	0.166667	0	0.333333	0.415037	1	1
4890	chr1:6965347-6965715	1	0	0	1	2	0	0.666667	0.333333	1	0.584963	0.625	1
4894	chr1:6974258-6974506	0	0	0	0	3	0	0.5	0	1	1	0.55	1
4933	chr1:7057814-7057991	7	2	1	11	9	7	6.16667	3.33333	9	1.20645	0.0131656	0.208798
4949	chr1:7093747-7094014	2	0	0	0	2	0	0.666667	0.666667	0.666667	0	1	1
4952	chr1:7097610-7097822	0	0	0	0	1	1	0.333333	0	0.666667	0.736966	0.5	1
4978	chr1:7171559-7171869	7	2	1	19	11	4	7.33333	3.33333	11.3333	1.50901	0.0905283	0.628391
4983	chr1:7186924-7187566	0	0	0	0	0	1	0.166667	0	0.333333	0.415037	1	1
4985	chr1:7191107-7191355	0	0	0	1	1	0	0.333333	0	0.666667	0.736966	0.5	1
4988	chr1:7206470-7207408	0	0	0	1	0	0	0.166667	0	0.333333	0.415037	1	1
4990	chr1:7217105-7217329	1	0	0	0	5	0	1	0.333333	1.66667	1	0.590705	1
4995	chr1:7263985-7264228	1	1	0	0	0	0	0.333333	0.666667	0	-0.736966	0.5	1
4997	chr1:7274520-7274734	2	0	0	6	0	0	1.33333	0.666667	2	0.847997	0.666667	1
5011	chr1:7298645-7298867	4	0	1	1	14	4	4	1.66667	6.33333	1.45943	0.284395	0.956563
5026	chr1:7344357-7344624	1	0	0	3	5	1	1.66667	0.333333	3	1.58496	0.0422102	0.409314
5031	chr1:7360422-7360661	6	1	1	7	7	4	4.33333	2.66667	6	0.932886	0.119861	0.682582
5037	chr1:7387177-7387391	0	0	0	3	2	0	0.833333	0	1.66667	1.41504	0.113277	0.682582
5055	chr1:7437722-7437906	0	0	0	0	1	0	0.166667	0	0.333333	0.415037	1	1
5120	chr1:7590968-7591186	4	2	2	8	7	6	4.83333	2.66667	7	1.12553	0.0241195	0.30003
5131	chr1:7606109-7606445	0	0	0	1	0	0	0.166667	0	0.333333	0.415037	1	1
5167	chr1:7694800-7695593	0	0	0	0	1	0	0.166667	0	0.333333	0.415037	1	1
5199	chr1:7743042-7743159	0	1	1	0	4	3	1.5	0.666667	2.33333	1	0.284119	0.956563
5212	chr1:7767040-7767377	0	0	0	1	3	0	0.666667	0	1.33333	1.22239	0.250526	0.888084
5223	chr1:7817539-7817720	3	0	1	4	11	1	3.33333	1.33333	5.33333	1.44057	0.224179	0.888084
5227	chr1:7825793-7826011	0	0	0	0	1	0	0.166667	0	0.333333	0.415037	1	1
5233	chr1:7838942-7839179	1	0	0	0	0	0	0.166667	0.333333	0	-0.415037	1	1
5243	chr1:7845934-7846239	0	0	0	1	1	0	0.333333	0	0.666667	0.736966	0.5	1
5245	chr1:7848611-7848888	1	0	0	0	0	0	0.166667	0.333333	0	-0.415037	1	1
5276	chr1:7955133-7955353	3	1	1	1	0	1	1.16667	1.66667	0.666667	-0.678072	0.453125	1
5281	chr1:7963540-7963762	21	10	5	13	16	9	12.3333	12	12.6667	0.0721498	0.94872	1
5282	chr1:7964667-7964888	4	1	1	8	3	0	2.83333	2	3.66667	0.63743	0.609267	1
5287	chr1:7977083-7977636	2	1	1	0	0	0	0.666667	1.33333	0	-1.22239	0.125	0.682582
5288	chr1:7984402-7984611	0	0	0	0	2	1	0.5	0	1	1	0.25	0.888084
5291	chr1:7990123-7990361	6	3	1	3	1	2	2.66667	3.33333	2	-0.530515	0.525046	1
5293	chr1:7993509-7993679	4	2	2	12	14	16	8.33333	2.66667	14	2.03242	1.16356e-06	0.00023367
5295	chr1:8004275-8004534	0	0	0	0	1	0	0.166667	0	0.333333	0.415037	1	1
5302	chr1:8015181-8015419	2	1	0	2	0	2	1.16667	1	1.33333	0.222392	1	1
5306	chr1:8023537-8023750	2	1	1	1	2	3	1.66667	1.33333	2	0.36257	0.753906	1
5309	chr1:8031697-8031917	0	0	0	1	0	0	0.166667	0	0.333333	0.415037	1	1
5311	chr1:8032671-8033034	1	0	0	1	0	0	0.333333	0.333333	0.333333	0	1	1
5323	chr1:8048527-8048640	0	0	0	0	1	1	0.333333	0	0.666667	0.736966	0.5	1
5325	chr1:8052699-8052927	1	0	0	0	0	0	0.166667	0.333333	0	-0.415037	1	1
5328	chr1:8055948-8056262	1	0	0	0	0	0	0.166667	0.333333	0	-0.415037	1	1
5330	chr1:8068481-8068701	0	1	0	0	0	0	0.166667	0.333333	0	-0.415037	1	1
5331	chr1:8069332-8069589	0	0	0	0	0	4	0.666667	0	1.33333	1.22239	0.483516	1
5340	chr1:8089943-8090660	1	1	0	0	0	0	0.333333	0.666667	0	-0.736966	0.5	1
5341	chr1:8092693-8093092	0	0	0	0	2	0	0.333333	0	0.666667	0.736966	0.666667	1
5343	chr1:8105788-8106034	2	1	0	3	3	1	1.66667	1	2.33333	0.736966	0.34375	1
5346	chr1:8116620-8117261	0	0	0	1	0	0	0.166667	0	0.333333	0.415037	1	1
5348	chr1:8118211-8118429	1	0	0	0	0	1	0.333333	0.333333	0.333333	0	1	1
5352	chr1:8125991-8126210	0	1	0	1	1	0	0.5	0.333333	0.666667	0.321928	1	1
5357	chr1:8134048-8134442	1	0	1	1	1	2	1	0.666667	1.33333	0.485427	0.6875	1
5360	chr1:8135420-8136210	0	0	0	0	1	0	0.166667	0	0.333333	0.415037	1	1
5361	chr1:8139743-8139972	1	1	0	0	0	0	0.333333	0.666667	0	-0.736966	0.5	1
5364	chr1:8148676-8148975	1	1	1	3	2	2	1.66667	1	2.33333	0.736966	0.34375	1
5367	chr1:8165986-8166208	3	2	1	2	4	1	2.16667	2	2.33333	0.152003	1	1
5369	chr1:8172135-8172358	1	0	0	0	2	0	0.5	0.333333	0.666667	0.321928	1	1
5373	chr1:8184823-8185323	1	0	0	0	0	0	0.166667	0.333333	0	-0.415037	1	1
5375	chr1:8188683-8188905	2	1	0	4	0	2	1.5	1	2	0.584963	0.612661	1
5391	chr1:8211131-8211345	0	1	1	0	2	1	0.833333	0.666667	1	0.263034	1	1
5395	chr1:8216401-8216690	0	0	0	1	0	0	0.166667	0	0.333333	0.415037	1	1
5400	chr1:8220559-8220777	1	0	0	0	0	0	0.166667	0.333333	0	-0.415037	1	1
5407	chr1:8247519-8247738	0	0	0	1	1	1	0.5	0	1	1	0.25	0.888084
5408	chr1:8247739-8247977	3	1	1	5	7	5	3.66667	1.66667	5.66667	1.32193	0.0169005	0.243762
5410	chr1:8250438-8250657	0	1	0	0	0	0	0.166667	0.333333	0	-0.415037	1	1
5418	chr1:8270813-8271042	1	1	0	0	1	1	0.666667	0.666667	0.666667	0	1	1
5427	chr1:8285622-8285955	1	1	0	1	0	0	0.5	0.666667	0.333333	-0.321928	1	1
5429	chr1:8289623-8290052	0	0	0	0	2	0	0.333333	0	0.666667	0.736966	0.666667	1
5436	chr1:8305351-8305891	0	0	0	1	0	0	0.166667	0	0.333333	0.415037	1	1
5440	chr1:8309218-8309604	1	1	0	0	0	0	0.333333	0.666667	0	-0.736966	0.5	1
5443	chr1:8313276-8313500	4	1	1	4	5	2	2.83333	2	3.66667	0.63743	0.332306	1
5445	chr1:8315157-8316077	1	0	0	0	0	0	0.166667	0.333333	0	-0.415037	1	1
5447	chr1:8316957-8317228	0	1	0	0	0	1	0.333333	0.333333	0.333333	0	1	1
5451	chr1:8321872-8322037	1	0	0	1	0	0	0.333333	0.333333	0.333333	0	1	1
5463	chr1:8351557-8351775	3	1	1	4	0	1	1.66667	1.66667	1.66667	0	1	1
5465	chr1:8352822-8353294	1	0	0	0	0	1	0.333333	0.333333	0.333333	0	1	1
5467	chr1:8359870-8360089	0	0	0	0	0	2	0.333333	0	0.666667	0.736966	0.666667	1
5475	chr1:8387794-8388015	1	1	0	0	2	0	0.666667	0.666667	0.666667	0	1	1
5480	chr1:8391946-8392162	0	0	0	0	0	1	0.166667	0	0.333333	0.415037	1	1
5482	chr1:8392665-8392885	2	0	1	5	4	2	2.33333	1	3.66667	1.22239	0.057373	0.506085
5489	chr1:8400316-8400529	0	0	0	0	0	1	0.166667	0	0.333333	0.415037	1	1
5490	chr1:8401696-8402191	1	1	0	0	0	0	0.333333	0.666667	0	-0.736966	0.5	1
5506	chr1:8427587-8428458	1	1	0	1	0	0	0.5	0.666667	0.333333	-0.321928	1	1
5509	chr1:8429943-8430161	0	1	0	0	0	0	0.166667	0.333333	0	-0.415037	1	1
5516	chr1:8445570-8445953	0	0	0	1	1	0	0.333333	0	0.666667	0.736966	0.5	1
5519	chr1:8448473-8448693	0	0	0	3	0	1	0.666667	0	1.33333	1.22239	0.250526	0.888084
5520	chr1:8455080-8455459	3	0	0	2	1	0	1	1	1	0	1	1
5522	chr1:8461354-8461426	0	1	0	0	7	1	1.5	0.333333	2.66667	1.45943	0.36644	1
5527	chr1:8463052-8463272	0	0	0	0	0	2	0.333333	0	0.666667	0.736966	0.666667	1
5528	chr1:8473709-8474039	0	0	0	0	0	1	0.166667	0	0.333333	0.415037	1	1
5539	chr1:8496082-8496303	3	0	1	1	0	0	0.833333	1.33333	0.333333	-0.807355	0.491203	1
5541	chr1:8499833-8500058	3	1	0	2	0	3	1.5	1.33333	1.66667	0.192645	1	1
5543	chr1:8508717-8508813	13	11	7	9	6	3	8.16667	10.3333	6	-0.695145	0.10443	0.682582
5545	chr1:8513516-8513790	2	0	0	0	7	0	1.5	0.666667	2.33333	1	0.615457	1
5552	chr1:8540293-8540807	1	0	0	0	0	0	0.166667	0.333333	0	-0.415037	1	1
5559	chr1:8558453-8558680	1	0	0	0	0	0	0.166667	0.333333	0	-0.415037	1	1
5573	chr1:8595682-8596089	0	0	0	1	0	0	0.166667	0	0.333333	0.415037	1	1
5578	chr1:8605836-8606424	1	0	0	0	0	0	0.166667	0.333333	0	-0.415037	1	1
5583	chr1:8636726-8637152	0	0	0	1	0	0	0.166667	0	0.333333	0.415037	1	1
5608	chr1:8746359-8746733	1	1	0	1	0	1	0.666667	0.666667	0.666667	0	1	1
5612	chr1:8760067-8760288	0	0	0	1	0	1	0.333333	0	0.666667	0.736966	0.5	1
5620	chr1:8773501-8773717	1	0	0	0	1	0	0.333333	0.333333	0.333333	0	1	1
5622	chr1:8784608-8784812	0	0	0	1	0	0	0.166667	0	0.333333	0.415037	1	1
5627	chr1:8787646-8787779	0	1	1	0	5	3	1.66667	0.666667	2.66667	1.1375	0.259824	0.908665
5637	chr1:8807927-8808154	1	0	0	0	0	1	0.333333	0.333333	0.333333	0	1	1
5643	chr1:8820178-8820402	0	1	0	0	3	0	0.666667	0.333333	1	0.584963	0.775401	1
5655	chr1:8845774-8845998	1	0	0	0	0	0	0.166667	0.333333	0	-0.415037	1	1
5668	chr1:8868895-8869121	3	2	1	3	2	3	2.33333	2	2.66667	0.289507	0.790527	1
5671	chr1:8870158-8870370	2	0	0	0	1	0	0.5	0.666667	0.333333	-0.321928	1	1
5681	chr1:8883588-8883879	2	1	1	3	2	3	2	1.33333	2.66667	0.652077	0.387695	1
5685	chr1:8885443-8885772	1	1	0	1	0	0	0.5	0.666667	0.333333	-0.321928	1	1
5687	chr1:8889955-8890473	0	0	0	0	0	1	0.166667	0	0.333333	0.415037	1	1
5689	chr1:8890616-8891000	7	1	1	16	13	4	7	3	11	1.58496	0.051394	0.472172
5699	chr1:8906827-8907641	0	0	0	0	0	1	0.166667	0	0.333333	0.415037	1	1
5703	chr1:8909834-8910053	1	1	1	3	6	2	2.33333	1	3.66667	1.22239	0.057373	0.506085
5712	chr1:8936656-8936781	8	8	5	18	24	15	13	7	19	1.32193	5.57112e-05	0.00489781
5721	chr1:8941146-8941368	0	1	0	8	9	1	3.16667	0.333333	6	2.39232	0.0154576	0.229633
5723	chr1:8942167-8942326	0	0	0	0	0	2	0.333333	0	0.666667	0.736966	0.666667	1
5726	chr1:8943248-8943465	1	1	0	3	2	0	1.16667	0.666667	1.66667	0.678072	0.484103	1
5735	chr1:8955543-8955747	1	0	0	1	2	4	1.33333	0.333333	2.33333	1.32193	0.0703125	0.533003
5739	chr1:8961405-8961794	0	0	0	0	1	0	0.166667	0	0.333333	0.415037	1	1
5740	chr1:8963289-8963507	0	0	1	0	0	1	0.333333	0.333333	0.333333	0	1	1
5756	chr1:8988102-8988369	0	0	0	0	1	0	0.166667	0	0.333333	0.415037	1	1
5763	chr1:9000821-9001142	1	0	1	0	0	0	0.333333	0.666667	0	-0.736966	0.5	1
5766	chr1:9006190-9006520	0	0	0	1	0	0	0.166667	0	0.333333	0.415037	1	1
5768	chr1:9012809-9013235	0	0	0	0	0	1	0.166667	0	0.333333	0.415037	1	1
5774	chr1:9024400-9024630	6	1	2	4	6	1	3.33333	3	3.66667	0.222392	0.876186	1
5777	chr1:9025652-9025870	3	2	1	2	2	0	1.66667	2	1.33333	-0.36257	0.753906	1
5779	chr1:9029852-9030189	3	2	0	6	1	0	2	1.66667	2.33333	0.321928	0.877059	1
5783	chr1:9032442-9032666	3	1	1	1	6	10	3.66667	1.66667	5.66667	1.32193	0.162347	0.819498
5787	chr1:9042532-9043093	1	0	0	1	1	1	0.666667	0.333333	1	0.584963	0.625	1
5791	chr1:9047375-9047599	24	7	4	27	19	7	14.6667	11.6667	17.6667	0.559427	0.510168	1
5802	chr1:9067891-9068834	1	0	0	0	0	0	0.166667	0.333333	0	-0.415037	1	1
5809	chr1:9076929-9077303	1	0	0	2	0	1	0.666667	0.333333	1	0.584963	0.625	1
5816	chr1:9084008-9084281	3	1	0	10	5	2	3.5	1.33333	5.66667	1.51457	0.0952437	0.644079
5818	chr1:9087047-9087406	2	0	0	1	2	1	1	0.666667	1.33333	0.485427	0.6875	1
5821	chr1:9096492-9096824	0	1	1	0	0	1	0.5	0.666667	0.333333	-0.321928	1	1
5828	chr1:9105544-9105853	3	1	1	1	7	1	2.33333	1.66667	3	0.584963	0.644714	1
5830	chr1:9113645-9113857	1	1	1	4	3	4	2.33333	1	3.66667	1.22239	0.057373	0.506085
5832	chr1:9115277-9115500	3	1	1	5	8	7	4.16667	1.66667	6.66667	1.52356	0.00407732	0.099004
5837	chr1:9123848-9124261	1	0	0	0	0	0	0.166667	0.333333	0	-0.415037	1	1
5838	chr1:9124648-9125036	1	1	0	1	3	0	1	0.666667	1.33333	0.485427	0.730304	1
5850	chr1:9136942-9137160	0	1	1	2	1	0	0.833333	0.666667	1	0.263034	1	1
5854	chr1:9147357-9147577	1	0	0	0	0	0	0.166667	0.333333	0	-0.415037	1	1
5858	chr1:9159577-9159606	1	0	0	0	0	1	0.333333	0.333333	0.333333	0	1	1
5861	chr1:9167543-9167911	1	0	0	0	0	1	0.333333	0.333333	0.333333	0	1	1
5865	chr1:9177226-9177745	0	0	0	0	1	1	0.333333	0	0.666667	0.736966	0.5	1
5876	chr1:9191387-9192262	2	0	0	0	1	0	0.5	0.666667	0.333333	-0.321928	1	1
5884	chr1:9218691-9218970	2	0	0	2	0	1	0.833333	0.666667	1	0.263034	1	1
5913	chr1:9266945-9267160	1	0	0	0	1	3	0.833333	0.333333	1.33333	0.807355	0.491203	1
5920	chr1:9275972-9276200	0	0	0	1	0	0	0.166667	0	0.333333	0.415037	1	1
5923	chr1:9278536-9278977	1	1	1	0	0	1	0.666667	1	0.333333	-0.584963	0.625	1
5948	chr1:9326973-9327946	1	0	0	0	0	0	0.166667	0.333333	0	-0.415037	1	1
5957	chr1:9351338-9351649	1	0	0	2	1	1	0.833333	0.333333	1.33333	0.807355	0.375	1
6028	chr1:9437905-9438120	4	1	1	3	5	6	3.33333	2	4.66667	0.917538	0.115318	0.682582
6029	chr1:9439984-9440181	3	1	1	5	0	4	2.33333	1.66667	3	0.584963	0.553288	1
6038	chr1:9456014-9456235	1	0	0	2	5	2	1.66667	0.333333	3	1.58496	0.0214844	0.277552
6042	chr1:9467417-9468276	0	0	0	0	1	0	0.166667	0	0.333333	0.415037	1	1
6044	chr1:9468766-9469089	1	1	0	2	1	1	1	0.666667	1.33333	0.485427	0.6875	1
6055	chr1:9480191-9480425	13	1	2	0	2	0	3	5.33333	0.666667	-1.926	0.239605	0.888084
6056	chr1:9480426-9480899	2	0	0	0	0	0	0.333333	0.666667	0	-0.736966	0.666667	1
6066	chr1:9487787-9487927	3	3	3	2	2	1	2.33333	3	1.66667	-0.584963	0.42395	1
6069	chr1:9488207-9488871	1	0	0	0	1	0	0.333333	0.333333	0.333333	0	1	1
6072	chr1:9503581-9503802	0	0	0	1	4	1	1	0	2	1.58496	0.0746606	0.548271
6084	chr1:9525365-9525571	0	0	0	1	0	0	0.166667	0	0.333333	0.415037	1	1
6095	chr1:9548234-9548450	4	1	2	4	11	2	4	2.33333	5.66667	1	0.293991	0.971497
6098	chr1:9552547-9552631	14	14	12	52	47	22	26.8333	13.3333	40.3333	1.52793	0.00261677	0.0720263
6100	chr1:9552808-9553026	1	0	0	5	8	1	2.5	0.333333	4.66667	2.08746	0.0303551	0.347026
6107	chr1:9559094-9559599	0	0	0	1	1	0	0.333333	0	0.666667	0.736966	0.5	1
6111	chr1:9562131-9562244	1	1	0	1	0	0	0.5	0.666667	0.333333	-0.321928	1	1
6118	chr1:9566367-9566960	2	1	0	1	1	0	0.833333	1	0.666667	-0.263034	1	1
6123	chr1:9572051-9572392	0	0	0	0	0	1	0.166667	0	0.333333	0.415037	1	1
6124	chr1:9573554-9574069	1	0	0	1	1	0	0.5	0.333333	0.666667	0.321928	1	1
6128	chr1:9576926-9577246	0	1	0	3	6	0	1.66667	0.333333	3	1.58496	0.164397	0.824197
6129	chr1:9581784-9582518	0	0	0	0	0	1	0.166667	0	0.333333	0.415037	1	1
6134	chr1:9583726-9583987	0	1	1	3	4	3	2	0.666667	3.33333	1.37851	0.0385742	0.389454
6139	chr1:9593953-9594329	0	0	0	0	0	1	0.166667	0	0.333333	0.415037	1	1
6140	chr1:9597421-9597635	0	0	0	0	0	1	0.166667	0	0.333333	0.415037	1	1
6149	chr1:9601306-9601688	0	0	0	2	2	0	0.666667	0	1.33333	1.22239	0.125	0.682582
6151	chr1:9602964-9603339	1	2	0	3	1	2	1.5	1	2	0.584963	0.507813	1
6153	chr1:9604420-9604693	0	0	0	2	0	1	0.5	0	1	1	0.25	0.888084
6164	chr1:9628586-9628833	3	1	1	0	1	0	1	1.66667	0.333333	-1	0.21875	0.888084
6169	chr1:9632375-9632600	0	0	0	0	0	1	0.166667	0	0.333333	0.415037	1	1
6174	chr1:9637110-9637413	1	0	0	0	0	0	0.166667	0.333333	0	-0.415037	1	1
6180	chr1:9640582-9640838	0	0	0	1	0	0	0.166667	0	0.333333	0.415037	1	1
6213	chr1:9680779-9681389	0	0	0	0	1	0	0.166667	0	0.333333	0.415037	1	1
6215	chr1:9682967-9683189	2	0	0	2	0	1	0.833333	0.666667	1	0.263034	1	1
6216	chr1:9683268-9683542	6	2	2	3	4	3	3.33333	3.33333	3.33333	0	1	1
6227	chr1:9697573-9698089	0	0	0	1	1	1	0.5	0	1	1	0.25	0.888084
6230	chr1:9699881-9700241	1	0	1	1	6	1	1.66667	0.666667	2.66667	1.1375	0.327034	1
6234	chr1:9702264-9702485	2	1	0	9	0	4	2.66667	1	4.33333	1.41504	0.250997	0.888084
6237	chr1:9709012-9709084	2	8	4	24	39	5	13.6667	4.66667	22.6667	2.06228	0.0540599	0.490027
6249	chr1:9721086-9721615	0	1	0	1	1	2	0.833333	0.333333	1.33333	0.807355	0.375	1
6251	chr1:9724200-9724450	2	1	0	0	4	1	1.33333	1	1.66667	0.415037	0.809635	1
6253	chr1:9726856-9727233	1	0	0	0	0	0	0.166667	0.333333	0	-0.415037	1	1
6255	chr1:9727528-9727771	2	0	0	0	1	0	0.5	0.666667	0.333333	-0.321928	1	1
6263	chr1:9736083-9736834	0	0	0	0	1	0	0.166667	0	0.333333	0.415037	1	1
6267	chr1:9739976-9740109	0	1	0	0	1	0	0.333333	0.333333	0.333333	0	1	1
6284	chr1:9753376-9753606	1	0	0	1	2	8	2	0.333333	3.66667	1.80735	0.143785	0.748561
6288	chr1:9770937-9771411	0	0	0	1	0	0	0.166667	0	0.333333	0.415037	1	1
6303	chr1:9802696-9802890	1	0	0	0	0	0	0.166667	0.333333	0	-0.415037	1	1
6306	chr1:9804905-9804965	0	0	1	2	0	1	0.666667	0.333333	1	0.584963	0.625	1
6307	chr1:9805182-9805211	0	1	0	0	0	0	0.166667	0.333333	0	-0.415037	1	1
6311	chr1:9810814-9811047	1	1	0	1	0	2	0.833333	0.666667	1	0.263034	1	1
6314	chr1:9818145-9818802	1	0	0	0	0	0	0.166667	0.333333	0	-0.415037	1	1
6318	chr1:9820740-9821255	2	0	1	1	3	1	1.33333	1	1.66667	0.415037	0.726563	1
6324	chr1:9829802-9830012	5	3	2	3	2	1	2.66667	3.33333	2	-0.530515	0.454498	1
6332	chr1:9839335-9839539	0	0	0	0	0	2	0.333333	0	0.666667	0.736966	0.666667	1
6335	chr1:9841595-9841813	1	0	0	1	0	0	0.333333	0.333333	0.333333	0	1	1
6343	chr1:9847853-9848850	1	0	0	0	1	1	0.5	0.333333	0.666667	0.321928	1	1
6350	chr1:9864128-9864345	1	1	0	2	0	1	0.833333	0.666667	1	0.263034	1	1
6358	chr1:9880288-9880501	1	1	0	0	0	1	0.5	0.666667	0.333333	-0.321928	1	1
6375	chr1:9889954-9890361	2	1	0	1	0	1	0.833333	1	0.666667	-0.263034	1	1
6376	chr1:9892973-9893060	0	0	0	1	0	0	0.166667	0	0.333333	0.415037	1	1
6380	chr1:9898107-9898316	1	0	0	0	0	1	0.333333	0.333333	0.333333	0	1	1
6385	chr1:9911522-9911743	1	0	0	0	1	2	0.666667	0.333333	1	0.584963	0.625	1
6386	chr1:9916885-9917104	0	0	0	0	0	1	0.166667	0	0.333333	0.415037	1	1
6393	chr1:9924480-9924986	0	0	0	1	0	0	0.166667	0	0.333333	0.415037	1	1
6411	chr1:9947976-9948184	1	0	0	0	6	2	1.5	0.333333	2.66667	1.45943	0.252317	0.890345
6417	chr1:9956770-9956949	0	1	1	1	1	1	0.833333	0.666667	1	0.263034	1	1
6419	chr1:9959216-9959741	0	0	0	0	1	1	0.333333	0	0.666667	0.736966	0.5	1
6422	chr1:9965574-9965876	1	1	1	2	0	0	0.833333	1	0.666667	-0.263034	1	1
6424	chr1:9968525-9968832	1	0	0	1	4	1	1.16667	0.333333	2	1.16993	0.199803	0.888084
6430	chr1:9971581-9971800	10	3	2	1	2	0	3	5	1	-1.58496	0.137812	0.727319
6431	chr1:9971801-9972019	1	0	1	1	2	3	1.33333	0.666667	2	0.847997	0.289063	0.956563
6441	chr1:9992989-9993237	0	0	0	0	1	0	0.166667	0	0.333333	0.415037	1	1
6448	chr1:10010242-10010732	9	1	2	8	2	1	3.83333	4	3.66667	-0.0995357	1	1
6470	chr1:10037631-10038338	0	1	0	0	0	0	0.166667	0.333333	0	-0.415037	1	1
6472	chr1:10042865-10043337	0	0	0	0	1	1	0.333333	0	0.666667	0.736966	0.5	1
6475	chr1:10044199-10044610	1	0	0	0	0	0	0.166667	0.333333	0	-0.415037	1	1
6479	chr1:10051337-10052040	1	0	0	0	0	0	0.166667	0.333333	0	-0.415037	1	1
6493	chr1:10061980-10062050	2	4	10	9	22	1	8	5.33333	10.6667	0.881356	0.45355	1
6495	chr1:10063907-10064401	1	0	0	0	0	0	0.166667	0.333333	0	-0.415037	1	1
6496	chr1:10066413-10066676	16	5	4	13	9	5	8.66667	8.33333	9	0.0995357	0.941477	1
6498	chr1:10067749-10068032	2	0	0	0	3	0	0.833333	0.666667	1	0.263034	1	1
6502	chr1:10072109-10072363	0	0	0	0	0	1	0.166667	0	0.333333	0.415037	1	1
6507	chr1:10077346-10077654	0	0	0	1	0	1	0.333333	0	0.666667	0.736966	0.5	1
6508	chr1:10080535-10080785	3	1	1	7	6	4	3.66667	1.66667	5.66667	1.32193	0.0169005	0.243762
6515	chr1:10083235-10083454	3	0	1	1	0	0	0.833333	1.33333	0.333333	-0.807355	0.491203	1
6517	chr1:10084073-10084293	3	1	2	0	2	1	1.5	2	1	-0.584963	0.507813	1
6523	chr1:10091242-10091355	0	0	0	1	0	1	0.333333	0	0.666667	0.736966	0.5	1
6527	chr1:10092039-10092390	2	0	0	3	0	2	1.16667	0.666667	1.66667	0.678072	0.554941	1
6533	chr1:10095150-10095371	10	1	0	3	3	2	3.16667	3.66667	2.66667	-0.347923	0.842713	1
6538	chr1:10097179-10097396	0	1	0	0	0	0	0.166667	0.333333	0	-0.415037	1	1
6539	chr1:10097926-10098262	1	0	0	1	0	0	0.333333	0.333333	0.333333	0	1	1
6550	chr1:10124915-10125093	1	0	0	0	2	2	0.833333	0.333333	1.33333	0.807355	0.375	1
6551	chr1:10126615-10126888	5	2	1	4	0	1	2.16667	2.66667	1.66667	-0.459432	0.700665	1
6554	chr1:10128501-10128857	2	1	0	0	0	0	0.5	1	0	-1	0.25	0.888084
6566	chr1:10154585-10154795	0	0	0	1	0	0	0.166667	0	0.333333	0.415037	1	1
6583	chr1:10194224-10194494	0	0	0	0	1	0	0.166667	0	0.333333	0.415037	1	1
6585	chr1:10199116-10199373	1	0	0	0	0	1	0.333333	0.333333	0.333333	0	1	1
6587	chr1:10202403-10203384	0	0	0	1	0	0	0.166667	0	0.333333	0.415037	1	1
6593	chr1:10213409-10214225	0	0	0	0	1	0	0.166667	0	0.333333	0.415037	1	1
6603	chr1:10223431-10223650	1	1	0	0	0	0	0.333333	0.666667	0	-0.736966	0.5	1
6605	chr1:10226548-10226907	1	0	0	0	0	0	0.166667	0.333333	0	-0.415037	1	1
6612	chr1:10244165-10244552	0	0	0	1	0	0	0.166667	0	0.333333	0.415037	1	1
6616	chr1:10251791-10252178	1	0	0	0	2	1	0.666667	0.333333	1	0.584963	0.625	1
6619	chr1:10252980-10253334	1	0	0	1	4	0	1	0.333333	1.66667	1	0.43436	1
6620	chr1:10253335-10253924	1	1	0	2	2	1	1.16667	0.666667	1.66667	0.678072	0.453125	1
6624	chr1:10259958-10260166	0	0	0	2	1	0	0.5	0	1	1	0.25	0.888084
6626	chr1:10260367-10261137	0	0	0	1	0	0	0.166667	0	0.333333	0.415037	1	1
6628	chr1:10265208-10265448	2	1	0	2	9	10	4	1	7	2	0.0172778	0.248046
6631	chr1:10265817-10266529	0	0	0	1	0	0	0.166667	0	0.333333	0.415037	1	1
6633	chr1:10268508-10268882	1	0	0	0	2	0	0.5	0.333333	0.666667	0.321928	1	1
6639	chr1:10274441-10274971	1	0	0	0	0	0	0.166667	0.333333	0	-0.415037	1	1
6641	chr1:10278572-10278795	2	3	1	3	0	1	1.66667	2	1.33333	-0.36257	0.753906	1
6642	chr1:10279963-10280184	0	0	0	0	1	2	0.5	0	1	1	0.25	0.888084
6657	chr1:10315100-10315338	2	0	0	1	4	1	1.33333	0.666667	2	0.847997	0.410222	1
6658	chr1:10315339-10315572	0	0	0	1	0	0	0.166667	0	0.333333	0.415037	1	1
6665	chr1:10353547-10353791	0	0	0	0	1	0	0.166667	0	0.333333	0.415037	1	1
6667	chr1:10375329-10375573	0	0	0	0	0	1	0.166667	0	0.333333	0.415037	1	1
6670	chr1:10378130-10378701	1	0	0	0	0	0	0.166667	0.333333	0	-0.415037	1	1
6673	chr1:10379253-10379640	0	0	0	1	0	0	0.166667	0	0.333333	0.415037	1	1
6674	chr1:10389125-10389715	0	0	0	0	1	0	0.166667	0	0.333333	0.415037	1	1
6678	chr1:10392963-10393185	2	0	0	1	0	1	0.666667	0.666667	0.666667	0	1	1
6684	chr1:10396300-10396793	1	0	0	0	0	0	0.166667	0.333333	0	-0.415037	1	1
6693	chr1:10420445-10420667	0	0	0	0	1	0	0.166667	0	0.333333	0.415037	1	1
6701	chr1:10433386-10433636	0	0	0	0	1	0	0.166667	0	0.333333	0.415037	1	1
6717	chr1:10453565-10453769	0	1	0	0	2	0	0.5	0.333333	0.666667	0.321928	1	1
6719	chr1:10456426-10456496	5	3	8	10	34	101	26.8333	5.33333	48.3333	2.96153	0.0652767	0.522112
6720	chr1:10457688-10458200	1	1	0	1	0	1	0.666667	0.666667	0.666667	0	1	1
6732	chr1:10474525-10474808	1	0	0	1	0	0	0.333333	0.333333	0.333333	0	1	1
6734	chr1:10477860-10478097	1	1	0	0	0	1	0.5	0.666667	0.333333	-0.321928	1	1
6738	chr1:10488662-10488879	0	0	0	0	1	0	0.166667	0	0.333333	0.415037	1	1
6741	chr1:10491594-10491835	3	0	0	3	2	0	1.33333	1	1.66667	0.415037	0.809635	1
6750	chr1:10503560-10504088	0	0	0	0	1	1	0.333333	0	0.666667	0.736966	0.5	1
6764	chr1:10526722-10526934	0	1	0	1	0	0	0.333333	0.333333	0.333333	0	1	1
6767	chr1:10529967-10530104	0	0	0	0	1	0	0.166667	0	0.333333	0.415037	1	1
6769	chr1:10530575-10530795	0	0	0	1	0	0	0.166667	0	0.333333	0.415037	1	1
6784	chr1:10542584-10542804	1	0	0	0	0	0	0.166667	0.333333	0	-0.415037	1	1
6786	chr1:10551831-10552148	2	0	0	0	0	0	0.333333	0.666667	0	-0.736966	0.666667	1
6788	chr1:10559599-10560104	1	0	0	0	0	0	0.166667	0.333333	0	-0.415037	1	1
6790	chr1:10560725-10560959	3	2	0	8	0	1	2.33333	1.66667	3	0.584963	0.723003	1
6813	chr1:10611841-10612074	1	0	0	0	0	0	0.166667	0.333333	0	-0.415037	1	1
6818	chr1:10623062-10623358	0	0	0	1	0	0	0.166667	0	0.333333	0.415037	1	1
6825	chr1:10660177-10660402	1	0	0	1	1	0	0.5	0.333333	0.666667	0.321928	1	1
6834	chr1:10681497-10681988	2	0	0	0	0	0	0.333333	0.666667	0	-0.736966	0.666667	1
6879	chr1:10705291-10705511	1	0	0	0	0	0	0.166667	0.333333	0	-0.415037	1	1
6965	chr1:10791015-10791087	0	0	0	0	1	0	0.166667	0	0.333333	0.415037	1	1
6997	chr1:10817550-10817769	2	1	1	1	2	1	1.33333	1.33333	1.33333	0	1	1
6999	chr1:10818482-10818607	0	0	0	0	0	1	0.166667	0	0.333333	0.415037	1	1
7013	chr1:10829667-10829885	0	0	0	0	1	0	0.166667	0	0.333333	0.415037	1	1
7052	chr1:10862003-10862213	1	1	0	0	0	1	0.5	0.666667	0.333333	-0.321928	1	1
7058	chr1:10878181-10878772	1	1	0	0	1	0	0.5	0.666667	0.333333	-0.321928	1	1
7068	chr1:10886267-10886490	2	1	0	0	0	1	0.666667	1	0.333333	-0.584963	0.625	1
7070	chr1:10886696-10886782	2	1	1	0	2	1	1.16667	1.33333	1	-0.222392	1	1
7085	chr1:10908777-10908991	6	2	1	4	2	1	2.66667	3	2.33333	-0.263034	0.852293	1
7107	chr1:10940902-10941588	1	0	0	0	1	0	0.333333	0.333333	0.333333	0	1	1
7110	chr1:10943298-10943923	1	1	0	0	1	0	0.5	0.666667	0.333333	-0.321928	1	1
7123	chr1:10951715-10951952	3	2	1	2	2	3	2.16667	2	2.33333	0.152003	1	1
7150	chr1:10989380-10989912	1	1	0	0	2	0	0.666667	0.666667	0.666667	0	1	1
7158	chr1:10992784-10993306	1	0	0	1	0	0	0.333333	0.333333	0.333333	0	1	1
7159	chr1:10996277-10996579	6	3	3	6	3	3	4	4	4	0	1	1
7184	chr1:11034861-11035387	1	0	0	1	0	0	0.333333	0.333333	0.333333	0	1	1
7200	chr1:11058769-11059182	1	0	0	0	0	1	0.333333	0.333333	0.333333	0	1	1
7216	chr1:11075565-11075651	14	7	8	21	1	29	13.3333	9.66667	17	0.754888	0.419548	1
7221	chr1:11078033-11078559	0	1	0	0	0	1	0.333333	0.333333	0.333333	0	1	1
7223	chr1:11079717-11080296	1	0	0	1	0	0	0.333333	0.333333	0.333333	0	1	1
7227	chr1:11089143-11089370	0	0	0	2	0	0	0.333333	0	0.666667	0.736966	0.666667	1
7228	chr1:11091104-11091510	1	0	0	4	0	1	1	0.333333	1.66667	1	0.43436	1
7233	chr1:11093027-11093914	1	0	0	1	0	0	0.333333	0.333333	0.333333	0	1	1
7235	chr1:11096259-11096485	2	1	1	1	1	1	1.16667	1.33333	1	-0.222392	1	1
7242	chr1:11109767-11109988	1	0	0	0	0	1	0.333333	0.333333	0.333333	0	1	1
7263	chr1:11121178-11121440	28	8	5	16	16	9	13.6667	13.6667	13.6667	0	1	1
7273	chr1:11141625-11142063	1	0	0	2	1	0	0.666667	0.333333	1	0.584963	0.625	1
7279	chr1:11155445-11155695	1	0	0	1	1	0	0.5	0.333333	0.666667	0.321928	1	1
7282	chr1:11156134-11156204	2	1	1	1	2	0	1.16667	1.33333	1	-0.222392	1	1
7303	chr1:11195593-11195814	3	0	0	0	0	1	0.666667	1	0.333333	-0.584963	0.775401	1
7306	chr1:11199842-11200060	0	0	0	0	3	1	0.666667	0	1.33333	1.22239	0.250526	0.888084
7310	chr1:11205527-11205878	0	1	0	0	1	0	0.333333	0.333333	0.333333	0	1	1
7329	chr1:11277551-11277814	1	0	0	0	1	2	0.666667	0.333333	1	0.584963	0.625	1
7331	chr1:11281145-11281470	0	0	0	2	0	1	0.5	0	1	1	0.25	0.888084
7338	chr1:11301082-11301302	1	0	0	0	0	0	0.166667	0.333333	0	-0.415037	1	1
7347	chr1:11320940-11321453	0	0	0	1	1	0	0.333333	0	0.666667	0.736966	0.5	1
7351	chr1:11323218-11323467	6	4	3	11	10	5	6.5	4.33333	8.66667	0.857981	0.0532519	0.48459
7354	chr1:11328103-11328657	1	0	0	0	0	0	0.166667	0.333333	0	-0.415037	1	1
7356	chr1:11330402-11331240	1	0	0	1	0	0	0.333333	0.333333	0.333333	0	1	1
7358	chr1:11332331-11332544	3	2	1	2	7	7	3.66667	2	5.33333	1.078	0.0851826	0.602961
7367	chr1:11351283-11351588	2	1	0	4	1	1	1.5	1	2	0.584963	0.56862	1
7373	chr1:11363175-11363713	1	0	0	1	0	0	0.333333	0.333333	0.333333	0	1	1
7375	chr1:11364499-11364894	2	0	1	3	0	1	1.16667	1	1.33333	0.222392	1	1
7388	chr1:11390191-11390987	1	0	0	0	0	0	0.166667	0.333333	0	-0.415037	1	1
7401	chr1:11413689-11413910	9	5	3	20	12	7	9.33333	5.66667	13	1.07039	0.0883683	0.619189
7404	chr1:11414284-11414873	0	0	0	2	2	3	1.16667	0	2.33333	1.73697	0.015625	0.229633
7407	chr1:11418424-11418704	1	0	0	0	2	0	0.5	0.333333	0.666667	0.321928	1	1
7417	chr1:11432498-11432589	10	11	6	4	60	86	29.5	9	50	2.3505	0.0617764	0.515357
7421	chr1:11436364-11436631	6	2	2	6	20	7	7.16667	3.33333	11	1.46949	0.105789	0.682582
7422	chr1:11438911-11439119	6	2	2	5	6	6	4.5	3.33333	5.66667	0.621488	0.247789	0.888084
7424	chr1:11441394-11441921	0	1	0	2	2	0	0.833333	0.333333	1.33333	0.807355	0.375	1
7427	chr1:11446548-11447071	3	1	0	3	4	3	2.33333	1.33333	3.33333	0.893085	0.179565	0.856021
7429	chr1:11453094-11453309	1	1	1	0	2	0	0.833333	1	0.666667	-0.263034	1	1
7435	chr1:11459098-11459277	3	2	2	9	10	6	5.33333	2.33333	8.33333	1.48543	0.0021024	0.0631646
7438	chr1:11459694-11459784	0	0	0	0	1	1	0.333333	0	0.666667	0.736966	0.5	1
7439	chr1:11463126-11463320	1	1	1	5	1	0	1.5	1	2	0.584963	0.673627	1
7443	chr1:11470386-11470609	0	0	0	0	5	0	0.833333	0	1.66667	1.41504	0.438317	1
7445	chr1:11477777-11477997	15	5	2	12	11	7	8.66667	7.33333	10	0.400538	0.582768	1
7447	chr1:11481562-11482072	0	1	0	0	0	0	0.166667	0.333333	0	-0.415037	1	1
7451	chr1:11483555-11483778	1	0	0	0	1	1	0.5	0.333333	0.666667	0.321928	1	1
7454	chr1:11491152-11491370	6	1	1	0	6	3	2.83333	2.66667	3	0.125531	1	1
7467	chr1:11520137-11520353	11	4	2	13	11	11	8.66667	5.66667	11.6667	0.925999	0.0417107	0.40779
7485	chr1:11569874-11570080	0	1	1	8	4	3	2.83333	0.666667	5	1.848	0.00691464	0.143738
7499	chr1:11592848-11592927	0	0	0	1	1	2	0.666667	0	1.33333	1.22239	0.125	0.682582
7509	chr1:11609783-11609999	1	0	0	1	1	1	0.666667	0.333333	1	0.584963	0.625	1
7514	chr1:11622421-11622636	26	8	6	30	27	14	18.5	13.3333	23.6667	0.783189	0.210654	0.888084
7518	chr1:11628666-11628888	9	3	2	4	1	1	3.33333	4.66667	2	-0.917538	0.332156	1
7524	chr1:11636809-11636914	11	14	3	24	49	14	19.1667	9.33333	29	1.53766	0.0637301	0.521136
7534	chr1:11656198-11656426	3	3	0	8	13	6	5.5	2	9	1.73697	0.002573	0.0715809
7537	chr1:11665541-11665659	26	20	7	38	46	23	26.6667	17.6667	35.6667	0.974005	0.0404056	0.398991
7547	chr1:11678099-11678654	0	1	0	0	3	0	0.666667	0.333333	1	0.584963	0.775401	1
7554	chr1:11683618-11683862	0	1	1	6	3	0	1.83333	0.666667	3	1.26303	0.250214	0.888084
7556	chr1:11687075-11687161	2	0	1	1	1	2	1.16667	1	1.33333	0.222392	1	1
7559	chr1:11694879-11695501	0	0	0	1	1	1	0.5	0	1	1	0.25	0.888084
7565	chr1:11702768-11702990	0	4	0	1	6	0	1.83333	1.33333	2.33333	0.514573	0.785754	1
7567	chr1:11704776-11704868	17	9	6	21	24	12	14.8333	10.6667	19	0.777608	0.0983139	0.657051
7611	chr1:11743729-11743952	4	2	1	4	3	2	2.66667	2.33333	3	0.263034	0.803619	1
7637	chr1:11770678-11770903	1	0	0	2	0	1	0.666667	0.333333	1	0.584963	0.625	1
7643	chr1:11776891-11777264	1	1	0	0	0	1	0.5	0.666667	0.333333	-0.321928	1	1
7664	chr1:11816371-11816584	1	1	0	8	12	8	5	0.666667	9.33333	2.63227	8.67993e-07	0.000187552
7666	chr1:11818091-11818317	0	1	0	0	0	1	0.333333	0.333333	0.333333	0	1	1
7669	chr1:11819680-11820494	0	0	0	0	1	0	0.166667	0	0.333333	0.415037	1	1
7687	chr1:11843398-11844093	0	0	0	0	1	0	0.166667	0	0.333333	0.415037	1	1
7691	chr1:11845883-11846815	0	1	0	1	1	0	0.5	0.333333	0.666667	0.321928	1	1
7715	chr1:11871533-11872088	0	0	0	1	0	0	0.166667	0	0.333333	0.415037	1	1
7718	chr1:11880499-11881057	0	0	0	1	0	0	0.166667	0	0.333333	0.415037	1	1
7726	chr1:11915303-11915517	6	4	3	7	13	5	6.33333	4.33333	8.33333	0.807355	0.149906	0.768205
7735	chr1:11925388-11925606	47	17	15	31	41	23	29	26.3333	31.6667	0.257158	0.66824	1
7737	chr1:11926008-11926370	1	1	0	3	3	1	1.5	0.666667	2.33333	1	0.179688	0.856021
7757	chr1:11955832-11956038	0	1	0	0	0	0	0.166667	0.333333	0	-0.415037	1	1
7776	chr1:11984025-11984188	9	8	9	4	19	8	9.5	8.66667	10.3333	0.229482	0.768936	1
7784	chr1:11993635-11993846	2	1	0	4	2	1	1.66667	1	2.33333	0.736966	0.34375	1
7798	chr1:12003447-12003668	0	1	0	1	0	0	0.333333	0.333333	0.333333	0	1	1
7800	chr1:12009570-12009809	0	0	0	1	0	0	0.166667	0	0.333333	0.415037	1	1
7822	chr1:12036825-12037043	0	1	0	1	0	0	0.333333	0.333333	0.333333	0	1	1
7827	chr1:12041266-12041484	12	2	1	8	2	2	4.5	5	4	-0.263034	0.874167	1
7829	chr1:12051214-12051905	2	0	0	1	1	0	0.666667	0.666667	0.666667	0	1	1
7832	chr1:12058034-12058252	1	0	0	0	0	1	0.333333	0.333333	0.333333	0	1	1
7835	chr1:12059726-12060078	1	0	0	0	0	0	0.166667	0.333333	0	-0.415037	1	1
7840	chr1:12073956-12074169	1	2	1	1	0	0	0.833333	1.33333	0.333333	-0.807355	0.375	1
7844	chr1:12077561-12077961	1	0	0	1	0	0	0.333333	0.333333	0.333333	0	1	1
7848	chr1:12080834-12081156	3	1	0	1	0	1	1	1.33333	0.666667	-0.485427	0.730304	1
7851	chr1:12083759-12083975	1	0	0	0	0	2	0.5	0.333333	0.666667	0.321928	1	1
7854	chr1:12085210-12085433	0	0	0	0	1	0	0.166667	0	0.333333	0.415037	1	1
7855	chr1:12085598-12086336	0	0	0	1	1	0	0.333333	0	0.666667	0.736966	0.5	1
7861	chr1:12096159-12096389	0	0	0	0	2	1	0.5	0	1	1	0.25	0.888084
7869	chr1:12102456-12102596	0	0	0	0	0	1	0.166667	0	0.333333	0.415037	1	1
7870	chr1:12103893-12104177	1	1	0	2	2	1	1.16667	0.666667	1.66667	0.678072	0.453125	1
7875	chr1:12108984-12109201	0	1	1	0	4	0	1	0.666667	1.33333	0.485427	0.823119	1
7876	chr1:12109220-12109647	1	0	0	2	2	1	1	0.333333	1.66667	1	0.21875	0.888084
7891	chr1:12136251-12136798	2	0	0	0	0	1	0.5	0.666667	0.333333	-0.321928	1	1
7899	chr1:12145261-12145480	1	1	0	0	1	2	0.833333	0.666667	1	0.263034	1	1
7901	chr1:12152658-12153225	0	0	0	1	1	1	0.5	0	1	1	0.25	0.888084
7903	chr1:12155438-12155666	1	1	0	4	4	4	2.33333	0.666667	4	1.58496	0.0129395	0.205632
7904	chr1:12160637-12160938	1	0	0	0	5	1	1.16667	0.333333	2	1.16993	0.402927	1
7910	chr1:12176537-12176781	1	0	0	0	1	0	0.333333	0.333333	0.333333	0	1	1
7913	chr1:12177233-12177868	0	0	0	0	1	0	0.166667	0	0.333333	0.415037	1	1
7915	chr1:12179015-12179487	4	1	0	2	2	2	1.83333	1.66667	2	0.169925	1	1
7919	chr1:12182979-12183275	6	1	1	7	10	4	4.83333	2.66667	7	1.12553	0.0908749	0.630584
7920	chr1:12184382-12184803	0	0	0	1	0	0	0.166667	0	0.333333	0.415037	1	1
7927	chr1:12191944-12192155	2	0	0	1	1	3	1.16667	0.666667	1.66667	0.678072	0.484103	1
7963	chr1:12256063-12256282	4	1	0	0	2	1	1.33333	1.66667	1	-0.415037	0.809635	1
7974	chr1:12271946-12272070	0	0	0	0	1	0	0.166667	0	0.333333	0.415037	1	1
7975	chr1:12277957-12278151	0	0	0	1	0	1	0.333333	0	0.666667	0.736966	0.5	1
7976	chr1:12278152-12278237	1	1	0	2	1	1	1	0.666667	1.33333	0.485427	0.6875	1
7978	chr1:12279226-12279716	1	0	0	2	1	1	0.833333	0.333333	1.33333	0.807355	0.375	1
7983	chr1:12288943-12289355	1	0	0	0	2	0	0.5	0.333333	0.666667	0.321928	1	1
7989	chr1:12293156-12293409	0	0	0	1	1	1	0.5	0	1	1	0.25	0.888084
7990	chr1:12293811-12294029	1	1	0	1	1	0	0.666667	0.666667	0.666667	0	1	1
7994	chr1:12306845-12307398	1	0	0	0	0	0	0.166667	0.333333	0	-0.415037	1	1
8000	chr1:12315096-12315313	0	0	0	1	0	2	0.5	0	1	1	0.25	0.888084
8002	chr1:12328112-12328326	1	0	0	0	0	0	0.166667	0.333333	0	-0.415037	1	1
8005	chr1:12350484-12350704	1	1	0	1	1	1	0.833333	0.666667	1	0.263034	1	1
8018	chr1:12407321-12407534	6	1	2	6	9	7	5.16667	3	7.33333	1.05889	0.0294494	0.34673
8026	chr1:12439916-12440181	3	1	1	1	1	1	1.33333	1.66667	1	-0.415037	0.726563	1
8038	chr1:12525795-12526114	0	0	0	1	0	3	0.666667	0	1.33333	1.22239	0.250526	0.888084
8061	chr1:12581892-12582123	4	1	1	1	4	0	1.83333	2	1.66667	-0.169925	1	1
8062	chr1:12582683-12582917	1	0	0	0	0	1	0.333333	0.333333	0.333333	0	1	1
8067	chr1:12590068-12590390	0	0	0	1	0	0	0.166667	0	0.333333	0.415037	1	1
8069	chr1:12591044-12591303	1	0	1	0	2	1	0.833333	0.666667	1	0.263034	1	1
8094	chr1:12639597-12639812	0	0	0	1	0	0	0.166667	0	0.333333	0.415037	1	1
8110	chr1:12657183-12657482	3	0	0	1	0	1	0.833333	1	0.666667	-0.263034	1	1
8113	chr1:12664891-12665006	0	1	0	2	0	1	0.666667	0.333333	1	0.584963	0.625	1
8116	chr1:12666588-12666816	1	0	0	0	0	0	0.166667	0.333333	0	-0.415037	1	1
8130	chr1:12685035-12685253	1	0	0	0	1	0	0.333333	0.333333	0.333333	0	1	1
8132	chr1:12688925-12689141	3	1	1	5	2	2	2.33333	1.66667	3	0.584963	0.42395	1
8134	chr1:12694617-12695213	3	0	0	0	1	0	0.666667	1	0.333333	-0.584963	0.775401	1
8146	chr1:12720748-12720955	2	1	1	2	5	1	2	1.33333	2.66667	0.652077	0.424669	1
8154	chr1:12753914-12754228	0	0	0	0	3	1	0.666667	0	1.33333	1.22239	0.250526	0.888084
8155	chr1:12773884-12774344	0	0	0	0	0	1	0.166667	0	0.333333	0.415037	1	1
8166	chr1:12800601-12801234	1	0	0	1	1	1	0.666667	0.333333	1	0.584963	0.625	1
8181	chr1:12890542-12890772	1	1	0	3	0	2	1.16667	0.666667	1.66667	0.678072	0.484103	1
8183	chr1:12897899-12898223	1	0	0	1	2	1	0.833333	0.333333	1.33333	0.807355	0.375	1
8187	chr1:12910704-12910986	1	1	0	0	6	2	1.66667	0.666667	2.66667	1.1375	0.355752	1
8190	chr1:12914285-12914432	0	0	0	0	2	0	0.333333	0	0.666667	0.736966	0.666667	1
8192	chr1:12936548-12936935	1	0	0	3	2	1	1.16667	0.333333	2	1.16993	0.125	0.682582
8195	chr1:12945155-12945530	1	0	1	1	3	3	1.5	0.666667	2.33333	1	0.179688	0.856021
8224	chr1:13039445-13039596	0	0	0	0	3	4	1.16667	0	2.33333	1.73697	0.0686656	0.533003
8226	chr1:13049908-13050296	1	0	0	2	1	0	0.666667	0.333333	1	0.584963	0.625	1
8240	chr1:13131663-13131958	0	0	0	1	0	0	0.166667	0	0.333333	0.415037	1	1
8244	chr1:13138903-13138988	0	0	1	0	1	2	0.666667	0.333333	1	0.584963	0.625	1
8254	chr1:13187782-13188234	1	0	0	4	2	1	1.33333	0.333333	2.33333	1.32193	0.0703125	0.533003
8257	chr1:13189662-13189809	0	0	1	3	3	3	1.66667	0.333333	3	1.58496	0.0214844	0.277552
8309	chr1:13481979-13482194	0	0	0	0	4	2	1	0	2	1.58496	0.121212	0.682582
8335	chr1:13523452-13523703	0	0	0	0	2	0	0.333333	0	0.666667	0.736966	0.666667	1
8370	chr1:13702816-13703031	1	0	0	2	2	0	0.833333	0.333333	1.33333	0.807355	0.375	1
8373	chr1:13706613-13706924	3	1	1	0	3	2	1.66667	1.66667	1.66667	0	1	1
8415	chr1:13773548-13773770	2	0	0	0	1	0	0.5	0.666667	0.333333	-0.321928	1	1
8417	chr1:13777237-13777579	3	0	0	1	2	3	1.5	1	2	0.584963	0.56862	1
8420	chr1:13784362-13784868	2	0	0	0	0	2	0.666667	0.666667	0.666667	0	1	1
8425	chr1:13799161-13799452	3	1	1	3	6	3	2.83333	1.66667	4	0.906891	0.143463	0.747494
8430	chr1:13811434-13811655	2	2	1	1	7	6	3.16667	1.66667	4.66667	1.08746	0.152239	0.777015
8433	chr1:13812486-13812811	3	1	1	9	8	3	4.16667	1.66667	6.66667	1.52356	0.0144759	0.22481
8438	chr1:13825898-13826631	2	1	0	1	2	0	1	1	1	0	1	1
8453	chr1:13851070-13851312	0	0	0	3	0	3	1	0	2	1.58496	0.0746606	0.548271
8458	chr1:13853889-13854112	1	0	0	0	2	0	0.5	0.333333	0.666667	0.321928	1	1
8460	chr1:13855728-13856104	1	0	0	0	3	1	0.833333	0.333333	1.33333	0.807355	0.491203	1
8464	chr1:13857153-13857576	0	0	1	1	2	1	0.833333	0.333333	1.33333	0.807355	0.375	1
8472	chr1:13874324-13874542	3	1	0	4	5	1	2.33333	1.33333	3.33333	0.893085	0.262341	0.91082
8475	chr1:13878441-13879385	0	0	0	0	2	0	0.333333	0	0.666667	0.736966	0.666667	1
8477	chr1:13880541-13880763	10	2	3	7	7	6	5.83333	5	6.66667	0.353637	0.601096	1
8487	chr1:13901190-13901417	0	0	0	0	0	1	0.166667	0	0.333333	0.415037	1	1
8494	chr1:13917530-13917769	3	1	0	0	1	2	1.16667	1.33333	1	-0.222392	1	1
8496	chr1:13919138-13919419	0	0	0	2	5	1	1.33333	0	2.66667	1.87447	0.0320445	0.35179
8497	chr1:13934437-13934524	0	0	0	0	2	1	0.5	0	1	1	0.25	0.888084
8500	chr1:13951860-13952079	1	0	0	0	3	0	0.666667	0.333333	1	0.584963	0.775401	1
8502	chr1:13952253-13952474	1	0	0	0	0	0	0.166667	0.333333	0	-0.415037	1	1
8510	chr1:13963223-13963603	1	0	0	2	1	2	1	0.333333	1.66667	1	0.21875	0.888084
8514	chr1:13991804-13992013	25	10	11	18	25	18	17.8333	15.3333	20.3333	0.38529	0.385691	1
8518	chr1:13994608-13995473	0	0	0	1	0	0	0.166667	0	0.333333	0.415037	1	1
8519	chr1:13999551-13999941	0	0	0	1	0	0	0.166667	0	0.333333	0.415037	1	1
8524	chr1:14021167-14021387	1	0	0	0	1	0	0.333333	0.333333	0.333333	0	1	1
8526	chr1:14025232-14025795	1	0	0	0	0	1	0.333333	0.333333	0.333333	0	1	1
8532	chr1:14037269-14037504	1	0	0	1	3	0	0.833333	0.333333	1.33333	0.807355	0.491203	1
8545	chr1:14082433-14082682	0	0	0	0	0	2	0.333333	0	0.666667	0.736966	0.666667	1
8551	chr1:14097828-14098149	0	0	0	1	0	0	0.166667	0	0.333333	0.415037	1	1
8563	chr1:14125645-14125864	0	0	0	2	2	2	1	0	2	1.58496	0.03125	0.347026
8572	chr1:14141695-14142018	0	0	0	2	0	1	0.5	0	1	1	0.25	0.888084
8580	chr1:14165272-14165496	2	1	0	1	0	1	0.833333	1	0.666667	-0.263034	1	1
8587	chr1:14201926-14202307	1	0	0	0	0	1	0.333333	0.333333	0.333333	0	1	1
8603	chr1:14237637-14238233	0	0	0	0	2	0	0.333333	0	0.666667	0.736966	0.666667	1
8605	chr1:14248214-14249157	0	0	0	1	0	0	0.166667	0	0.333333	0.415037	1	1
8614	chr1:14259691-14259911	1	1	1	1	3	0	1.16667	1	1.33333	0.222392	1	1
8620	chr1:14284776-14284993	0	1	0	1	0	0	0.333333	0.333333	0.333333	0	1	1
8633	chr1:14327371-14327668	0	1	0	0	2	0	0.5	0.333333	0.666667	0.321928	1	1
8638	chr1:14378064-14378259	3	1	0	0	4	0	1.33333	1.33333	1.33333	0	1	1
8644	chr1:14402450-14402700	0	0	0	0	1	1	0.333333	0	0.666667	0.736966	0.5	1
8647	chr1:14418679-14418896	0	0	0	0	0	1	0.166667	0	0.333333	0.415037	1	1
8652	chr1:14453301-14453525	2	0	0	0	3	0	0.833333	0.666667	1	0.263034	1	1
8655	chr1:14501692-14501911	0	0	0	0	2	2	0.666667	0	1.33333	1.22239	0.125	0.682582
8661	chr1:14537809-14538028	0	0	0	0	8	0	1.33333	0	2.66667	1.87447	0.356719	1
8663	chr1:14566049-14566372	0	1	0	1	5	0	1.16667	0.333333	2	1.16993	0.402927	1
8667	chr1:14584804-14585082	2	0	0	0	1	0	0.5	0.666667	0.333333	-0.321928	1	1
8670	chr1:14598971-14599277	3	0	0	0	4	0	1.16667	1	1.33333	0.222392	1	1
8672	chr1:14606562-14606790	3	2	1	2	20	1	4.83333	2	7.66667	1.53051	0.394673	1
8679	chr1:14667476-14667660	0	1	0	0	1	2	0.666667	0.333333	1	0.584963	0.625	1
8680	chr1:14669337-14669560	1	0	0	0	5	0	1	0.333333	1.66667	1	0.590705	1
8684	chr1:14677759-14677978	4	1	0	4	7	1	2.83333	1.66667	4	0.906891	0.343833	1
8695	chr1:14702030-14702308	0	0	0	0	2	1	0.5	0	1	1	0.25	0.888084
8699	chr1:14722380-14722588	0	1	0	0	2	0	0.5	0.333333	0.666667	0.321928	1	1
8701	chr1:14744188-14744416	6	1	1	4	11	5	4.66667	2.66667	6.66667	1.06413	0.177052	0.856021
8709	chr1:14759824-14760280	2	0	0	3	2	0	1.16667	0.666667	1.66667	0.678072	0.554941	1
8711	chr1:14762447-14762649	0	1	0	3	3	0	1.16667	0.333333	2	1.16993	0.199803	0.888084
8714	chr1:14771615-14771835	1	0	0	0	5	0	1	0.333333	1.66667	1	0.590705	1
8716	chr1:14779545-14779844	1	0	0	2	5	0	1.33333	0.333333	2.33333	1.32193	0.255192	0.895957
8717	chr1:14783247-14783500	1	1	1	1	4	2	1.66667	1	2.33333	0.736966	0.34375	1
8723	chr1:14834296-14834387	0	0	0	0	2	0	0.333333	0	0.666667	0.736966	0.666667	1
8725	chr1:14840461-14840745	0	0	0	0	2	0	0.333333	0	0.666667	0.736966	0.666667	1
8727	chr1:14863018-14863302	0	0	0	0	5	0	0.833333	0	1.66667	1.41504	0.438317	1
8734	chr1:14874172-14874582	0	0	0	0	1	0	0.166667	0	0.333333	0.415037	1	1
8736	chr1:14890459-14890592	0	0	0	0	2	0	0.333333	0	0.666667	0.736966	0.666667	1
8737	chr1:14899764-14899866	7	8	4	32	55	4	18.3333	6.33333	30.3333	2.09516	0.0821065	0.58565
8743	chr1:14921081-14921564	1	1	0	2	3	1	1.33333	0.666667	2	0.847997	0.289063	0.956563
8753	chr1:14936797-14937035	1	1	1	1	7	1	2	1	3	1	0.410795	1
8756	chr1:14941565-14942046	2	1	0	5	2	1	1.83333	1	2.66667	0.874469	0.317778	1
8762	chr1:14955436-14955648	1	1	1	4	12	3	3.66667	1	6.33333	1.87447	0.0587649	0.515357
8763	chr1:14968631-14968820	1	1	0	1	3	2	1.33333	0.666667	2	0.847997	0.289063	0.956563
8796	chr1:15060893-15060974	0	0	0	0	1	0	0.166667	0	0.333333	0.415037	1	1
8798	chr1:15061649-15062335	0	1	0	0	0	0	0.166667	0.333333	0	-0.415037	1	1
8805	chr1:15088366-15089145	0	0	0	1	0	0	0.166667	0	0.333333	0.415037	1	1
8810	chr1:15095944-15096210	0	1	1	0	0	0	0.333333	0.666667	0	-0.736966	0.5	1
8811	chr1:15097887-15098246	1	0	0	0	1	1	0.5	0.333333	0.666667	0.321928	1	1
8814	chr1:15103590-15103817	2	0	0	1	9	1	2.16667	0.666667	3.66667	1.48543	0.327621	1
8835	chr1:15140816-15141402	0	1	1	0	1	2	0.833333	0.666667	1	0.263034	1	1
8838	chr1:15167481-15167826	6	1	0	5	8	1	3.5	2.33333	4.66667	0.765535	0.4727	1
8848	chr1:15190693-15190982	2	1	1	3	4	1	2	1.33333	2.66667	0.652077	0.387695	1
8854	chr1:15201502-15201751	3	1	1	10	5	1	3.5	1.66667	5.33333	1.24793	0.207093	0.888084
8856	chr1:15210336-15210812	1	0	0	0	0	0	0.166667	0.333333	0	-0.415037	1	1
8863	chr1:15217433-15217980	0	0	0	0	0	1	0.166667	0	0.333333	0.415037	1	1
8867	chr1:15222644-15222864	6	3	2	5	10	4	5	3.66667	6.33333	0.652077	0.291025	0.962409
8871	chr1:15228815-15229039	1	1	0	1	1	2	1	0.666667	1.33333	0.485427	0.6875	1
8875	chr1:15242759-15242981	1	0	0	3	1	0	0.833333	0.333333	1.33333	0.807355	0.491203	1
8876	chr1:15249034-15249212	0	0	0	1	1	0	0.333333	0	0.666667	0.736966	0.5	1
8891	chr1:15260437-15260664	1	0	0	0	0	2	0.5	0.333333	0.666667	0.321928	1	1
8892	chr1:15264729-15264962	0	2	0	0	1	2	0.833333	0.666667	1	0.263034	1	1
8898	chr1:15267505-15267941	0	1	1	2	0	1	0.833333	0.666667	1	0.263034	1	1
8899	chr1:15270099-15270494	2	1	1	0	2	2	1.33333	1.33333	1.33333	0	1	1
8904	chr1:15272927-15273063	1	1	0	2	5	1	1.66667	0.666667	2.66667	1.1375	0.175965	0.856021
8915	chr1:15298271-15298299	5	4	8	2	1	2	3.66667	5.66667	1.66667	-1.32193	0.0169005	0.243762
8923	chr1:15309874-15310362	1	1	0	0	0	0	0.333333	0.666667	0	-0.736966	0.5	1
8933	chr1:15319233-15319447	0	0	0	1	0	0	0.166667	0	0.333333	0.415037	1	1
8937	chr1:15323830-15324377	0	0	0	1	0	0	0.166667	0	0.333333	0.415037	1	1
8962	chr1:15367877-15368455	3	2	1	17	13	6	7	2	12	2.11548	0.00134179	0.0469961
8963	chr1:15372501-15372718	6	1	1	3	17	5	5.5	2.66667	8.33333	1.34792	0.24644	0.888084
8969	chr1:15385222-15385442	6	4	1	4	4	5	4	3.66667	4.33333	0.192645	0.83882	1
8975	chr1:15395999-15396047	1	1	2	1	0	1	1	1.33333	0.666667	-0.485427	0.6875	1
9004	chr1:15458725-15459212	1	1	0	0	0	0	0.333333	0.666667	0	-0.736966	0.5	1
9006	chr1:15465155-15465550	1	1	0	1	0	0	0.5	0.666667	0.333333	-0.321928	1	1
9022	chr1:15517377-15517903	3	1	0	1	1	1	1.16667	1.33333	1	-0.222392	1	1
9024	chr1:15519044-15519260	3	1	0	1	5	3	2.16667	1.33333	3	0.777608	0.360176	1
9028	chr1:15525006-15525807	0	0	0	0	1	1	0.333333	0	0.666667	0.736966	0.5	1
9039	chr1:15555192-15555415	0	1	0	2	4	2	1.5	0.333333	2.66667	1.45943	0.0390625	0.389454
9041	chr1:15555742-15555979	9	3	1	10	8	7	6.33333	4.33333	8.33333	0.807355	0.149906	0.768205
9044	chr1:15562203-15562273	0	0	0	0	0	1	0.166667	0	0.333333	0.415037	1	1
9049	chr1:15567984-15568653	0	1	0	0	0	0	0.166667	0.333333	0	-0.415037	1	1
9058	chr1:15585175-15585262	0	1	0	1	2	1	0.833333	0.333333	1.33333	0.807355	0.375	1
9059	chr1:15597239-15597559	1	1	1	1	1	1	1	1	1	0	1	1
9064	chr1:15601552-15601799	0	1	0	0	0	0	0.166667	0.333333	0	-0.415037	1	1
9065	chr1:15602965-15603222	1	0	0	1	2	0	0.666667	0.333333	1	0.584963	0.625	1
9073	chr1:15620983-15621121	0	1	0	0	0	1	0.333333	0.333333	0.333333	0	1	1
9075	chr1:15627419-15627637	0	0	1	0	0	0	0.166667	0.333333	0	-0.415037	1	1
9081	chr1:15634320-15634717	2	0	0	0	0	2	0.666667	0.666667	0.666667	0	1	1
9086	chr1:15642075-15642381	2	1	0	4	1	1	1.5	1	2	0.584963	0.56862	1
9087	chr1:15643380-15643611	3	1	0	3	1	0	1.33333	1.33333	1.33333	0	1	1
9098	chr1:15666415-15666621	1	2	1	2	2	4	2	1.33333	2.66667	0.652077	0.387695	1
9106	chr1:15674039-15674288	4	1	1	2	3	1	2	2	2	0	1	1
9113	chr1:15686201-15686370	0	0	0	0	4	0	0.666667	0	1.33333	1.22239	0.483516	1
9119	chr1:15693518-15693916	3	1	0	1	1	2	1.33333	1.33333	1.33333	0	1	1
9122	chr1:15694561-15694664	0	0	1	0	5	0	1	0.333333	1.66667	1	0.590705	1
9123	chr1:15699708-15699932	0	1	0	0	0	0	0.166667	0.333333	0	-0.415037	1	1
9125	chr1:15704446-15704705	4	1	1	1	0	0	1.16667	2	0.333333	-1.16993	0.199803	0.888084
9152	chr1:15744579-15744649	0	0	0	0	1	0	0.166667	0	0.333333	0.415037	1	1
9157	chr1:15751560-15751945	4	1	1	1	5	1	2.16667	2	2.33333	0.152003	1	1
9166	chr1:15761152-15761511	2	0	0	1	1	2	1	0.666667	1.33333	0.485427	0.6875	1
9192	chr1:15816462-15816677	0	1	0	1	2	0	0.666667	0.333333	1	0.584963	0.625	1
9204	chr1:15846950-15847576	0	0	0	1	1	0	0.333333	0	0.666667	0.736966	0.5	1
9219	chr1:15864597-15864814	0	0	0	0	1	0	0.166667	0	0.333333	0.415037	1	1
9226	chr1:15879823-15880058	0	0	0	0	0	1	0.166667	0	0.333333	0.415037	1	1
9230	chr1:15882823-15883073	1	0	0	0	0	0	0.166667	0.333333	0	-0.415037	1	1
9234	chr1:15898948-15899417	0	0	0	0	1	0	0.166667	0	0.333333	0.415037	1	1
9238	chr1:15903338-15903558	1	1	1	0	0	1	0.666667	1	0.333333	-0.584963	0.625	1
9256	chr1:15927797-15928014	5	4	5	1	7	10	5.33333	4.66667	6	0.304855	0.70989	1
9258	chr1:15929112-15929420	12	4	4	3	8	4	5.83333	6.66667	5	-0.353637	0.667291	1
9260	chr1:15933241-15933937	0	0	0	0	1	0	0.166667	0	0.333333	0.415037	1	1
9262	chr1:15939085-15939301	1	0	0	0	0	0	0.166667	0.333333	0	-0.415037	1	1
9268	chr1:15946050-15946328	1	0	0	1	1	2	0.833333	0.333333	1.33333	0.807355	0.375	1
9272	chr1:15956320-15956530	0	1	0	1	0	0	0.333333	0.333333	0.333333	0	1	1
9274	chr1:15957432-15957650	7	2	1	5	7	4	4.33333	3.33333	5.33333	0.547488	0.418459	1
9277	chr1:15963956-15964177	1	0	0	1	0	1	0.5	0.333333	0.666667	0.321928	1	1
9278	chr1:15968937-15969486	1	0	0	1	0	0	0.333333	0.333333	0.333333	0	1	1
9284	chr1:15974161-15974383	1	0	0	5	7	0	2.16667	0.333333	4	1.90689	0.0837185	0.594262
9294	chr1:15996762-15997123	0	1	0	1	0	1	0.5	0.333333	0.666667	0.321928	1	1
9296	chr1:15998491-15999103	0	0	0	0	0	1	0.166667	0	0.333333	0.415037	1	1
9298	chr1:15999472-15999768	0	0	0	0	1	2	0.5	0	1	1	0.25	0.888084
9299	chr1:16001629-16001852	2	1	1	3	0	4	1.83333	1.33333	2.33333	0.514573	0.596623	1
9324	chr1:16048732-16048952	0	0	1	0	1	1	0.5	0.333333	0.666667	0.321928	1	1
9368	chr1:16078995-16079176	0	0	0	1	1	0	0.333333	0	0.666667	0.736966	0.5	1
9393	chr1:16097835-16098208	1	0	0	0	0	0	0.166667	0.333333	0	-0.415037	1	1
9394	chr1:16099614-16099802	2	0	0	0	0	0	0.333333	0.666667	0	-0.736966	0.666667	1
9401	chr1:16108307-16108528	1	0	0	0	0	0	0.166667	0.333333	0	-0.415037	1	1
9403	chr1:16109387-16109797	1	0	0	0	0	0	0.166667	0.333333	0	-0.415037	1	1
9410	chr1:16111529-16112054	1	1	0	0	0	0	0.333333	0.666667	0	-0.736966	0.5	1
9417	chr1:16123659-16123882	3	1	1	3	6	3	2.83333	1.66667	4	0.906891	0.143463	0.747494
9423	chr1:16138361-16138643	1	0	0	0	0	2	0.5	0.333333	0.666667	0.321928	1	1
9428	chr1:16144365-16144579	3	0	0	0	0	0	0.5	1	0	-1	0.55	1
9430	chr1:16145727-16145945	0	0	0	0	1	0	0.166667	0	0.333333	0.415037	1	1
9437	chr1:16152775-16153531	1	0	0	0	0	0	0.166667	0.333333	0	-0.415037	1	1
9438	chr1:16153952-16154145	1	0	1	3	0	1	1	0.666667	1.33333	0.485427	0.730304	1
9449	chr1:16163068-16163404	9	2	2	8	5	2	4.66667	4.33333	5	0.169925	0.910162	1
9457	chr1:16170046-16170256	0	0	1	0	1	0	0.333333	0.333333	0.333333	0	1	1
9459	chr1:16171146-16171368	3	1	1	3	1	1	1.66667	1.66667	1.66667	0	1	1
9460	chr1:16172055-16172265	0	1	0	3	1	2	1.16667	0.333333	2	1.16993	0.125	0.682582
9468	chr1:16183945-16184323	2	1	0	2	1	1	1.16667	1	1.33333	0.222392	1	1
9469	chr1:16185138-16185295	4	3	3	5	5	3	3.83333	3.33333	4.33333	0.29956	0.677639	1
9474	chr1:16187720-16187963	2	1	0	0	0	3	1	1	1	0	1	1
9478	chr1:16192942-16193164	0	0	0	0	1	0	0.166667	0	0.333333	0.415037	1	1
9488	chr1:16213869-16214101	1	1	1	0	2	0	0.833333	1	0.666667	-0.263034	1	1
9490	chr1:16216302-16216592	0	1	0	3	0	0	0.666667	0.333333	1	0.584963	0.775401	1
9494	chr1:16221511-16221723	1	1	0	0	2	0	0.666667	0.666667	0.666667	0	1	1
9498	chr1:16232161-16232372	0	1	1	2	0	0	0.666667	0.666667	0.666667	0	1	1
9502	chr1:16244807-16245026	0	0	0	0	1	0	0.166667	0	0.333333	0.415037	1	1
9510	chr1:16264692-16265013	3	1	1	4	2	1	2	1.66667	2.33333	0.321928	0.774414	1
9539	chr1:16307061-16307304	3	1	1	2	5	5	2.83333	1.66667	4	0.906891	0.143463	0.747494
9550	chr1:16326144-16326361	1	1	0	4	7	2	2.5	0.666667	4.33333	1.67807	0.0192631	0.267096
9608	chr1:16413339-16413563	1	0	0	0	1	1	0.5	0.333333	0.666667	0.321928	1	1
9622	chr1:16425249-16425471	3	2	1	3	1	0	1.66667	2	1.33333	-0.36257	0.753906	1
9629	chr1:16449677-16450090	0	0	0	1	0	0	0.166667	0	0.333333	0.415037	1	1
9643	chr1:16474460-16474686	4	1	1	6	33	10	9.16667	2	16.3333	2.53051	0.0588505	0.515357
9661	chr1:16487368-16487943	0	0	0	2	3	1	1	0	2	1.58496	0.03125	0.347026
9666	chr1:16489349-16490046	0	0	0	1	0	0	0.166667	0	0.333333	0.415037	1	1
9673	chr1:16497410-16497486	0	1	0	4	3	6	2.33333	0.333333	4.33333	2	0.00183105	0.0574747
9680	chr1:16504790-16505051	6	2	2	4	7	5	4.33333	3.33333	5.33333	0.547488	0.32694	1
9685	chr1:16509306-16509559	6	1	0	3	11	6	4.5	2.33333	6.66667	1.20163	0.172142	0.850085
9706	chr1:16542034-16542275	3	0	0	3	0	2	1.33333	1	1.66667	0.415037	0.809635	1
9719	chr1:16561316-16561532	1	1	0	1	3	0	1	0.666667	1.33333	0.485427	0.730304	1
9728	chr1:16595162-16595404	0	0	0	0	14	0	2.33333	0	4.66667	2.5025	0.278115	0.950531
9734	chr1:16604554-16604775	2	1	0	1	0	1	0.833333	1	0.666667	-0.263034	1	1
9739	chr1:16610086-16610301	1	0	0	1	0	0	0.333333	0.333333	0.333333	0	1	1
9744	chr1:16615160-16615377	0	0	0	3	0	3	1	0	2	1.58496	0.0746606	0.548271
9746	chr1:16622769-16623069	0	1	0	0	0	1	0.333333	0.333333	0.333333	0	1	1
9748	chr1:16623951-16624286	1	0	0	1	0	1	0.5	0.333333	0.666667	0.321928	1	1
9750	chr1:16624421-16624645	1	0	0	2	0	1	0.666667	0.333333	1	0.584963	0.625	1
9767	chr1:16663163-16663404	1	0	0	2	1	4	1.33333	0.333333	2.33333	1.32193	0.0703125	0.533003
9771	chr1:16672859-16673107	0	1	0	2	0	1	0.666667	0.333333	1	0.584963	0.625	1
9773	chr1:16674795-16675120	4	1	0	1	0	1	1.16667	1.66667	0.666667	-0.678072	0.605225	1
9789	chr1:16690731-16690961	3	2	0	3	4	3	2.5	1.66667	3.33333	0.70044	0.301758	0.989649
9796	chr1:16698050-16698262	0	1	0	0	0	0	0.166667	0.333333	0	-0.415037	1	1
9798	chr1:16701466-16701685	2	1	1	0	2	0	1	1.33333	0.666667	-0.485427	0.6875	1
9800	chr1:16707057-16707421	0	0	0	0	1	0	0.166667	0	0.333333	0.415037	1	1
9812	chr1:16726615-16726863	1	1	0	1	0	0	0.5	0.666667	0.333333	-0.321928	1	1
9818	chr1:16732708-16732792	1	3	1	8	9	3	4.16667	1.66667	6.66667	1.52356	0.0144759	0.22481
9822	chr1:16740654-16740889	0	0	0	3	1	1	0.833333	0	1.66667	1.41504	0.0625	0.515357
9824	chr1:16742148-16742740	0	0	0	0	0	1	0.166667	0	0.333333	0.415037	1	1
9825	chr1:16743010-16743097	0	0	0	0	2	0	0.333333	0	0.666667	0.736966	0.666667	1
9827	chr1:16746287-16746936	2	0	0	1	0	1	0.666667	0.666667	0.666667	0	1	1
9831	chr1:16765698-16766003	0	0	0	0	1	1	0.333333	0	0.666667	0.736966	0.5	1
9846	chr1:16836475-16836695	0	1	1	0	2	1	0.833333	0.666667	1	0.263034	1	1
9849	chr1:16839280-16839610	1	0	0	1	0	1	0.5	0.333333	0.666667	0.321928	1	1
9850	chr1:16845073-16845295	3	1	0	2	0	1	1.16667	1.33333	1	-0.222392	1	1
9871	chr1:16912625-16912803	2	3	1	3	4	4	2.83333	2	3.66667	0.63743	0.332306	1
9885	chr1:16961094-16961181	0	0	0	0	1	0	0.166667	0	0.333333	0.415037	1	1
9902	chr1:17000910-17001132	1	0	0	0	0	1	0.333333	0.333333	0.333333	0	1	1
9929	chr1:17034908-17035122	26	14	20	16	21	28	20.8333	20	21.6667	0.110183	0.786339	1
9937	chr1:17050923-17051016	0	1	0	0	0	1	0.333333	0.333333	0.333333	0	1	1
9981	chr1:17207350-17207576	0	1	0	1	1	2	0.833333	0.333333	1.33333	0.807355	0.375	1
9989	chr1:17218041-17218261	0	1	1	2	7	7	3	0.666667	5.33333	1.926	0.00662058	0.139253
9991	chr1:17226552-17226771	2	0	0	1	2	1	1	0.666667	1.33333	0.485427	0.6875	1
9992	chr1:17226811-17227014	5	1	1	0	0	1	1.33333	2.33333	0.333333	-1.32193	0.214843	0.888084
9995	chr1:17230607-17231084	4	1	2	3	1	2	2.16667	2.33333	2	-0.152003	1	1
9997	chr1:17237306-17237577	3	0	1	2	3	6	2.5	1.33333	3.66667	1	0.176344	0.856021
10005	chr1:17255002-17255222	0	0	1	0	0	0	0.166667	0.333333	0	-0.415037	1	1
10009	chr1:17267772-17268151	0	0	0	1	1	0	0.333333	0	0.666667	0.736966	0.5	1
10043	chr1:17317538-17318100	0	0	0	1	0	0	0.166667	0	0.333333	0.415037	1	1
10052	chr1:17321251-17321468	0	0	0	0	1	0	0.166667	0	0.333333	0.415037	1	1
10062	chr1:17343165-17343810	0	1	0	0	0	0	0.166667	0.333333	0	-0.415037	1	1
10067	chr1:17352953-17353171	0	0	0	0	5	2	1.16667	0	2.33333	1.73697	0.130755	0.699292
10073	chr1:17358787-17359232	1	0	0	0	1	1	0.5	0.333333	0.666667	0.321928	1	1
10085	chr1:17381423-17381644	3	1	1	0	0	2	1.16667	1.66667	0.666667	-0.678072	0.484103	1
10089	chr1:17384338-17384646	3	1	0	2	3	2	1.83333	1.33333	2.33333	0.514573	0.548828	1
10093	chr1:17402803-17403013	2	0	0	3	4	3	2	0.666667	3.33333	1.37851	0.0385742	0.389454
10110	chr1:17433031-17433482	4	1	1	5	6	1	3	2	4	0.736966	0.362455	1
10122	chr1:17453264-17453486	1	1	1	1	1	1	1	1	1	0	1	1
10128	chr1:17472679-17472923	2	1	0	0	1	0	0.666667	1	0.333333	-0.584963	0.625	1
10137	chr1:17510915-17511237	0	1	0	2	0	0	0.5	0.333333	0.666667	0.321928	1	1
10178	chr1:17574523-17574611	0	0	0	0	0	1	0.166667	0	0.333333	0.415037	1	1
10184	chr1:17582809-17583451	0	1	0	0	1	1	0.5	0.333333	0.666667	0.321928	1	1
10201	chr1:17627832-17627960	3	2	0	4	1	2	2	1.66667	2.33333	0.321928	0.791252	1
10206	chr1:17636880-17637044	45	37	25	31	62	40	40	35.6667	44.3333	0.306103	0.444755	1
10233	chr1:17683756-17683961	0	0	0	0	3	1	0.666667	0	1.33333	1.22239	0.250526	0.888084
10234	chr1:17684129-17684350	3	0	0	1	5	0	1.5	1	2	0.584963	0.731116	1
10240	chr1:17700080-17700565	0	1	0	0	2	1	0.666667	0.333333	1	0.584963	0.625	1
10241	chr1:17711058-17711158	12	9	3	19	47	2	15.3333	8	22.6667	1.39486	0.27802	0.9503
10255	chr1:17748225-17748445	2	0	0	1	0	0	0.5	0.666667	0.333333	-0.321928	1	1
10261	chr1:17756534-17757208	0	0	0	1	0	0	0.166667	0	0.333333	0.415037	1	1
10264	chr1:17759167-17759378	5	2	0	5	2	1	2.5	2.33333	2.66667	0.137504	1	1
10270	chr1:17762154-17762338	1	1	1	1	1	0	0.833333	1	0.666667	-0.263034	1	1
10286	chr1:17771681-17771898	1	1	0	1	0	1	0.666667	0.666667	0.666667	0	1	1
10293	chr1:17782256-17782886	0	0	0	1	0	0	0.166667	0	0.333333	0.415037	1	1
10296	chr1:17783407-17783620	1	0	0	0	0	2	0.5	0.333333	0.666667	0.321928	1	1
10299	chr1:17784848-17785096	1	0	0	2	5	0	1.33333	0.333333	2.33333	1.32193	0.255192	0.895957
10302	chr1:17788634-17788959	1	0	0	0	0	0	0.166667	0.333333	0	-0.415037	1	1
10304	chr1:17793621-17793835	1	0	0	0	1	3	0.833333	0.333333	1.33333	0.807355	0.491203	1
10307	chr1:17795583-17795879	6	0	1	6	0	2	2.5	2.33333	2.66667	0.137504	1	1
10312	chr1:17801373-17801597	3	1	0	1	0	0	0.833333	1.33333	0.333333	-0.807355	0.491203	1
10316	chr1:17805739-17806056	1	1	1	0	0	1	0.666667	1	0.333333	-0.584963	0.625	1
10325	chr1:17811550-17811915	3	0	0	3	1	1	1.33333	1	1.66667	0.415037	0.7871	1
10328	chr1:17818571-17818831	3	1	2	3	4	4	2.83333	2	3.66667	0.63743	0.332306	1
10336	chr1:17839073-17839449	0	0	1	0	1	0	0.333333	0.333333	0.333333	0	1	1
10353	chr1:17867966-17868386	3	0	0	3	1	2	1.5	1	2	0.584963	0.56862	1
10357	chr1:17878987-17879519	2	1	1	1	1	0	1	1.33333	0.666667	-0.485427	0.6875	1
10385	chr1:17924690-17924847	0	0	1	0	0	0	0.166667	0.333333	0	-0.415037	1	1
10386	chr1:17927172-17927469	6	2	1	6	3	1	3.16667	3	3.33333	0.115477	1	1
10394	chr1:17932882-17933109	1	0	1	2	0	1	0.833333	0.666667	1	0.263034	1	1
10419	chr1:17976287-17977152	1	0	0	0	0	0	0.166667	0.333333	0	-0.415037	1	1
10424	chr1:17989900-17989972	0	1	0	0	0	0	0.166667	0.333333	0	-0.415037	1	1
10439	chr1:18007372-18007657	2	0	0	2	0	2	1	0.666667	1.33333	0.485427	0.730304	1
10468	chr1:18043399-18043636	3	1	1	14	10	9	6.33333	1.66667	11	2.16993	4.25596e-06	0.000659449
10496	chr1:18127183-18127403	19	7	4	11	17	12	11.6667	10	13.3333	0.381871	0.546049	1
10510	chr1:18181469-18181692	3	1	0	6	8	2	3.33333	1.33333	5.33333	1.44057	0.0547911	0.495106
10512	chr1:18184074-18184423	4	1	0	9	2	2	3	1.66667	4.33333	1	0.377088	1
10523	chr1:18221039-18221368	4	1	1	2	5	3	2.66667	2	3.33333	0.530515	0.454498	1
10528	chr1:18238092-18238162	5	16	30	3	21	31	17.6667	17	18.3333	0.103093	0.928639	1
10532	chr1:18249150-18249599	3	0	0	0	2	0	0.833333	1	0.666667	-0.263034	1	1
10540	chr1:18264171-18264573	2	0	0	0	2	1	0.833333	0.666667	1	0.263034	1	1
10542	chr1:18265675-18265811	0	1	1	3	9	2	2.66667	0.666667	4.66667	1.76553	0.0765969	0.556731
10560	chr1:18338770-18339533	1	0	0	1	1	0	0.5	0.333333	0.666667	0.321928	1	1
10570	chr1:18366473-18366689	2	0	0	4	1	4	1.83333	0.666667	3	1.26303	0.0896237	0.623252
10572	chr1:18368979-18369279	1	1	0	1	2	2	1.16667	0.666667	1.66667	0.678072	0.453125	1
10586	chr1:18389145-18389755	1	0	0	0	0	0	0.166667	0.333333	0	-0.415037	1	1
10589	chr1:18398154-18398379	1	2	1	1	2	2	1.5	1.33333	1.66667	0.192645	1	1
10606	chr1:18454081-18454327	4	1	2	8	9	4	4.66667	2.33333	7	1.26303	0.012541	0.205632
10620	chr1:18499485-18499706	1	1	0	2	2	2	1.33333	0.666667	2	0.847997	0.289063	0.956563
10627	chr1:18534969-18535209	1	0	0	0	1	2	0.666667	0.333333	1	0.584963	0.625	1
10637	chr1:18541330-18541546	1	2	1	3	3	1	1.83333	1.33333	2.33333	0.514573	0.548828	1
10650	chr1:18613064-18613599	0	0	0	0	1	0	0.166667	0	0.333333	0.415037	1	1
10689	chr1:18764555-18764775	0	1	0	0	0	1	0.333333	0.333333	0.333333	0	1	1
10702	chr1:18798467-18798813	3	0	1	4	0	3	1.83333	1.33333	2.33333	0.514573	0.661035	1
10703	chr1:18800484-18800745	1	2	1	6	11	3	4	1.33333	6.66667	1.71621	0.0252713	0.310496
10713	chr1:18820584-18820795	3	2	2	12	17	12	8	2.33333	13.6667	2.1375	6.24041e-07	0.000148293
10718	chr1:18837127-18837351	0	0	0	4	3	5	2	0	4	2.32193	0.000488281	0.0228878
10745	chr1:18911486-18911874	1	1	0	2	2	4	1.66667	0.666667	2.66667	1.1375	0.109375	0.682582
10751	chr1:18922130-18922221	6	4	1	15	9	10	7.5	3.66667	11.3333	1.4021	0.00147817	0.0502864
10753	chr1:18922620-18923414	3	0	0	0	1	0	0.666667	1	0.333333	-0.584963	0.775401	1
10757	chr1:18927009-18927228	3	1	0	6	9	7	4.33333	1.33333	7.33333	1.8365	0.000533521	0.0240485
10811	chr1:19014929-19015332	3	1	0	1	2	4	1.83333	1.33333	2.33333	0.514573	0.596623	1
10817	chr1:19026148-19026364	3	1	1	1	2	1	1.5	1.66667	1.33333	-0.192645	1	1
10818	chr1:19028066-19028757	1	0	0	0	0	0	0.166667	0.333333	0	-0.415037	1	1
10839	chr1:19062658-19062883	4	1	2	4	10	7	4.66667	2.33333	7	1.26303	0.0231297	0.290169
10848	chr1:19098250-19098472	2	1	1	3	7	1	2.5	1.33333	3.66667	1	0.263012	0.91082
10854	chr1:19108585-19108725	1	1	1	1	1	4	1.5	1	2	0.584963	0.507813	1
10858	chr1:19117069-19117365	3	1	1	5	5	2	2.83333	1.66667	4	0.906891	0.143463	0.747494
10894	chr1:19194136-19194206	0	0	0	0	1	1	0.333333	0	0.666667	0.736966	0.5	1
10915	chr1:19218085-19218446	3	1	0	1	2	1	1.33333	1.33333	1.33333	0	1	1
10928	chr1:19242311-19242543	6	3	2	4	5	5	4.16667	3.66667	4.66667	0.280108	0.690038	1
10964	chr1:19297907-19298146	4	2	2	1	0	1	1.66667	2.66667	0.666667	-1.1375	0.109375	0.682582
10965	chr1:19298193-19298525	0	0	0	0	2	2	0.666667	0	1.33333	1.22239	0.125	0.682582
10974	chr1:19327483-19327697	1	0	0	0	1	1	0.5	0.333333	0.666667	0.321928	1	1
10978	chr1:19335276-19335521	4	3	0	4	8	3	3.66667	2.33333	5	0.847997	0.228189	0.888084
10981	chr1:19342860-19343081	0	0	1	1	0	0	0.333333	0.333333	0.333333	0	1	1
10996	chr1:19377992-19378217	1	0	0	0	0	2	0.5	0.333333	0.666667	0.321928	1	1
11012	chr1:19417037-19417514	1	0	0	1	1	0	0.5	0.333333	0.666667	0.321928	1	1
11018	chr1:19457940-19458291	0	0	0	0	0	1	0.166667	0	0.333333	0.415037	1	1
11020	chr1:19495164-19495396	0	1	0	0	0	0	0.166667	0.333333	0	-0.415037	1	1
11026	chr1:19541238-19541718	0	0	0	0	1	0	0.166667	0	0.333333	0.415037	1	1
11040	chr1:19571422-19571859	1	0	0	0	0	0	0.166667	0.333333	0	-0.415037	1	1
11042	chr1:19574193-19574442	1	0	1	0	0	0	0.333333	0.666667	0	-0.736966	0.5	1
11046	chr1:19585552-19585683	0	0	0	1	5	1	1.16667	0	2.33333	1.73697	0.099575	0.661423
11048	chr1:19590571-19590839	2	1	0	0	2	1	1	1	1	0	1	1
11068	chr1:19618331-19618437	10	7	3	1	2	1	4	6.66667	1.33333	-1.71621	0.0107574	0.190092
11084	chr1:19647300-19647550	1	0	0	0	0	0	0.166667	0.333333	0	-0.415037	1	1
11112	chr1:19688824-19689025	4	3	3	3	12	3	4.66667	3.33333	6	0.691878	0.442882	1
11113	chr1:19692162-19692252	4	3	3	4	4	1	3.16667	3.33333	3	-0.115477	1	1
11115	chr1:19692774-19693106	2	0	0	3	1	0	1	0.666667	1.33333	0.485427	0.772797	1
11126	chr1:19719022-19719209	1	1	0	0	0	0	0.333333	0.666667	0	-0.736966	0.5	1
11135	chr1:19748968-19749155	3	1	1	0	4	2	1.83333	1.66667	2	0.169925	1	1
11143	chr1:19767253-19767478	0	0	0	0	4	2	1	0	2	1.58496	0.121212	0.682582
11152	chr1:19786864-19787293	0	0	0	1	0	1	0.333333	0	0.666667	0.736966	0.5	1
11167	chr1:19812779-19812988	11	6	8	8	14	8	9.16667	8.33333	10	0.237039	0.590053	1
11169	chr1:19813297-19813991	4	1	0	0	5	2	2	1.66667	2.33333	0.321928	0.864809	1
11172	chr1:19815974-19816198	1	0	0	0	0	0	0.166667	0.333333	0	-0.415037	1	1
11173	chr1:19817876-19818507	1	0	0	0	1	0	0.333333	0.333333	0.333333	0	1	1
11178	chr1:19828681-19828897	1	0	0	5	2	1	1.5	0.333333	2.66667	1.45943	0.0955177	0.644079
11180	chr1:19834507-19834735	0	0	0	1	2	1	0.666667	0	1.33333	1.22239	0.125	0.682582
11181	chr1:19834925-19835159	1	0	0	0	0	0	0.166667	0.333333	0	-0.415037	1	1
11193	chr1:19879946-19880639	0	0	0	0	1	0	0.166667	0	0.333333	0.415037	1	1
11198	chr1:19886588-19886862	0	0	0	0	0	1	0.166667	0	0.333333	0.415037	1	1
11203	chr1:19888819-19889070	1	0	0	0	2	0	0.5	0.333333	0.666667	0.321928	1	1
11210	chr1:19899722-19899941	1	2	0	1	7	0	1.83333	1	2.66667	0.874469	0.57406	1
11213	chr1:19903217-19903449	5	1	1	8	0	3	3	2.33333	3.66667	0.485427	0.718805	1
11226	chr1:19930711-19930927	3	0	1	3	4	5	2.66667	1.33333	4	1.09954	0.0768127	0.556731
11229	chr1:19937539-19937753	6	5	2	5	3	5	4.33333	4.33333	4.33333	0	1	1
11233	chr1:19950874-19951095	0	0	0	0	0	2	0.333333	0	0.666667	0.736966	0.666667	1
11240	chr1:19963085-19963318	0	1	1	0	0	1	0.5	0.666667	0.333333	-0.321928	1	1
11257	chr1:19975946-19976326	3	1	0	0	1	0	0.833333	1.33333	0.333333	-0.807355	0.491203	1
11259	chr1:19976562-19977230	2	0	0	0	0	0	0.333333	0.666667	0	-0.736966	0.666667	1
11270	chr1:19987784-19988003	9	1	1	7	5	2	4.16667	3.66667	4.66667	0.280108	0.830193	1
11278	chr1:19999912-20000115	2	0	1	2	7	9	3.5	1	6	1.80735	0.0216538	0.278795
11307	chr1:20093950-20094509	0	0	0	0	0	1	0.166667	0	0.333333	0.415037	1	1
11313	chr1:20104860-20105070	0	1	0	0	0	0	0.166667	0.333333	0	-0.415037	1	1
11314	chr1:20115274-20115492	0	0	0	0	0	1	0.166667	0	0.333333	0.415037	1	1
11324	chr1:20136470-20136750	2	1	0	5	7	6	3.5	1	6	1.80735	0.00148964	0.0502864
11339	chr1:20170642-20170891	1	1	0	1	0	1	0.666667	0.666667	0.666667	0	1	1
11341	chr1:20175277-20175497	0	1	0	1	0	1	0.5	0.333333	0.666667	0.321928	1	1
11345	chr1:20180233-20180678	0	1	0	2	0	0	0.5	0.333333	0.666667	0.321928	1	1
11352	chr1:20182037-20182249	3	0	1	6	5	4	3.16667	1.33333	5	1.36257	0.0192108	0.267096
11353	chr1:20189983-20190267	0	1	0	3	8	6	3	0.333333	5.66667	2.32193	0.000284471	0.0155364
11356	chr1:20190778-20191001	8	5	4	19	20	14	11.6667	5.66667	17.6667	1.48543	1.91997e-05	0.00212168
11362	chr1:20206726-20207031	1	0	0	0	0	0	0.166667	0.333333	0	-0.415037	1	1
11364	chr1:20208051-20208271	0	0	0	2	1	1	0.666667	0	1.33333	1.22239	0.125	0.682582
11397	chr1:20261317-20262000	0	1	0	1	1	1	0.666667	0.333333	1	0.584963	0.625	1
11399	chr1:20274753-20274985	2	1	0	0	0	0	0.5	1	0	-1	0.25	0.888084
11405	chr1:20312554-20312852	0	0	0	1	0	0	0.166667	0	0.333333	0.415037	1	1
11406	chr1:20348443-20348623	0	0	0	2	0	0	0.333333	0	0.666667	0.736966	0.666667	1
11435	chr1:20462073-20462339	1	1	0	0	0	1	0.5	0.666667	0.333333	-0.321928	1	1
11447	chr1:20498348-20498899	0	0	0	1	1	0	0.333333	0	0.666667	0.736966	0.5	1
11465	chr1:20564842-20565126	1	0	0	0	0	0	0.166667	0.333333	0	-0.415037	1	1
11486	chr1:20643397-20643573	17	7	5	16	34	24	17.1667	9.66667	24.6667	1.26679	0.0181205	0.257549
11495	chr1:20653052-20653254	9	4	4	14	5	3	6.5	5.66667	7.33333	0.321928	0.727232	1
11514	chr1:20694306-20694557	43	14	8	26	8	19	19.6667	21.6667	17.6667	-0.280108	0.764558	1
11519	chr1:20708121-20708411	3	1	2	3	0	2	1.83333	2	1.66667	-0.169925	1	1
11534	chr1:20759822-20760048	1	1	0	4	0	0	1	0.666667	1.33333	0.485427	0.823119	1
11537	chr1:20760897-20761117	9	3	2	5	9	3	5.16667	4.66667	5.66667	0.234465	0.814421	1
11545	chr1:20797914-20798134	5	1	1	2	0	1	1.66667	2.33333	1	-0.736966	0.498131	1
11566	chr1:20829120-20829346	0	0	0	1	0	0	0.166667	0	0.333333	0.415037	1	1
11569	chr1:20833407-20833633	3	1	1	1	2	1	1.5	1.66667	1.33333	-0.192645	1	1
11576	chr1:20839990-20840309	0	0	0	1	0	1	0.333333	0	0.666667	0.736966	0.5	1
11578	chr1:20844270-20844622	3	0	0	2	0	0	0.833333	1	0.666667	-0.263034	1	1
11581	chr1:20851146-20851798	0	1	0	0	0	1	0.333333	0.333333	0.333333	0	1	1
11583	chr1:20855475-20855696	9	2	1	2	7	5	4.33333	4	4.66667	0.180572	0.910447	1
11588	chr1:20874416-20874691	2	1	0	6	2	1	2	1	3	1	0.30704	1
11591	chr1:20876773-20876993	0	0	0	1	0	0	0.166667	0	0.333333	0.415037	1	1
11603	chr1:20891010-20891262	0	0	0	0	0	1	0.166667	0	0.333333	0.415037	1	1
11622	chr1:20932665-20932752	6	13	0	2	54	0	12.5	6.33333	18.6667	1.42321	0.530781	1
11625	chr1:20937967-20938756	0	0	0	1	0	0	0.166667	0	0.333333	0.415037	1	1
11626	chr1:20939031-20939360	2	0	1	1	1	1	1	1	1	0	1	1
11635	chr1:20947161-20947522	2	1	0	2	0	3	1.33333	1	1.66667	0.415037	0.755812	1
11660	chr1:20998932-20999641	2	0	0	1	1	2	1	0.666667	1.33333	0.485427	0.6875	1
11667	chr1:21013142-21013369	2	2	0	5	0	0	1.5	1.33333	1.66667	0.192645	1	1
11681	chr1:21027635-21027848	2	1	0	2	5	8	3	1	5	1.58496	0.0362169	0.381854
11683	chr1:21030295-21030348	1	1	3	1	0	1	1.16667	1.66667	0.666667	-0.678072	0.453125	1
11694	chr1:21042764-21043746	0	0	0	1	0	0	0.166667	0	0.333333	0.415037	1	1
11720	chr1:21066322-21066540	3	2	1	8	2	1	2.83333	2	3.66667	0.63743	0.562468	1
11722	chr1:21078379-21078679	0	0	0	0	1	0	0.166667	0	0.333333	0.415037	1	1
11724	chr1:21084491-21084563	0	0	1	0	1	12	2.33333	0.333333	4.33333	2	0.318343	1
11728	chr1:21091132-21091292	1	0	0	0	0	0	0.166667	0.333333	0	-0.415037	1	1
11738	chr1:21110033-21110187	3	1	2	3	2	2	2.16667	2	2.33333	0.152003	1	1
11745	chr1:21118077-21118387	2	1	0	0	0	0	0.5	1	0	-1	0.25	0.888084
11747	chr1:21121885-21122105	0	0	1	0	0	0	0.166667	0.333333	0	-0.415037	1	1
11753	chr1:21145994-21146233	6	1	1	5	11	9	5.5	2.66667	8.33333	1.34792	0.0241407	0.30003
11759	chr1:21166081-21166293	3	0	0	6	1	0	1.66667	1	2.33333	0.736966	0.655264	1
11762	chr1:21171013-21171249	0	0	0	0	1	0	0.166667	0	0.333333	0.415037	1	1
11785	chr1:21258084-21258342	4	1	0	2	1	0	1.33333	1.66667	1	-0.415037	0.809635	1
11790	chr1:21293058-21293332	1	0	0	0	0	0	0.166667	0.333333	0	-0.415037	1	1
11792	chr1:21306337-21306543	0	1	0	0	0	0	0.166667	0.333333	0	-0.415037	1	1
11793	chr1:21312839-21313166	0	0	0	0	0	1	0.166667	0	0.333333	0.415037	1	1
11795	chr1:21316878-21317086	0	0	0	0	0	2	0.333333	0	0.666667	0.736966	0.666667	1
11800	chr1:21336241-21336459	2	0	0	0	0	0	0.333333	0.666667	0	-0.736966	0.666667	1
11802	chr1:21353779-21354309	1	0	0	0	0	0	0.166667	0.333333	0	-0.415037	1	1
11810	chr1:21390296-21390566	6	1	1	0	1	0	1.5	2.66667	0.333333	-1.45943	0.224573	0.888084
11811	chr1:21401720-21401986	1	0	0	0	0	1	0.333333	0.333333	0.333333	0	1	1
11816	chr1:21408228-21408451	0	0	0	1	0	0	0.166667	0	0.333333	0.415037	1	1
11817	chr1:21435102-21435320	0	1	0	0	0	2	0.5	0.333333	0.666667	0.321928	1	1
11842	chr1:21493738-21494175	1	0	0	0	0	1	0.333333	0.333333	0.333333	0	1	1
11854	chr1:21512255-21512339	0	0	1	0	3	0	0.666667	0.333333	1	0.584963	0.775401	1
11861	chr1:21531793-21531880	0	0	1	1	2	1	0.833333	0.333333	1.33333	0.807355	0.375	1
11864	chr1:21540560-21540867	1	0	1	4	0	3	1.5	0.666667	2.33333	1	0.284119	0.956563
11871	chr1:21547045-21547213	2	1	2	5	8	1	3.16667	1.66667	4.66667	1.08746	0.189335	0.888084
11888	chr1:21562994-21563066	1	1	2	1	2	1	1.33333	1.33333	1.33333	0	1	1
11892	chr1:21577206-21577424	1	0	0	0	0	3	0.666667	0.333333	1	0.584963	0.775401	1
11900	chr1:21601764-21602012	0	0	0	1	0	0	0.166667	0	0.333333	0.415037	1	1
11906	chr1:21607439-21607607	2	2	1	0	1	1	1.16667	1.66667	0.666667	-0.678072	0.453125	1
11909	chr1:21608283-21608482	6	3	2	2	2	1	2.66667	3.66667	1.66667	-0.807355	0.210114	0.888084
11936	chr1:21636378-21636967	0	0	0	0	1	0	0.166667	0	0.333333	0.415037	1	1
11949	chr1:21650404-21650625	7	3	1	4	11	1	4.5	3.66667	5.33333	0.440573	0.70585	1
11955	chr1:21656822-21657202	6	1	0	11	9	2	4.83333	2.33333	7.33333	1.32193	0.147099	0.757422
11972	chr1:21680907-21681141	1	1	0	3	2	2	1.5	0.666667	2.33333	1	0.179688	0.856021
11981	chr1:21695881-21696104	2	1	0	5	1	0	1.5	1	2	0.584963	0.695999	1
11983	chr1:21696847-21697073	2	6	3	2	8	9	5	3.66667	6.33333	0.652077	0.350149	1
11990	chr1:21709592-21709844	3	1	0	1	1	1	1.16667	1.33333	1	-0.222392	1	1
11995	chr1:21722380-21722643	3	0	0	2	0	2	1.16667	1	1.33333	0.222392	1	1
11999	chr1:21727939-21728246	1	0	0	2	0	0	0.5	0.333333	0.666667	0.321928	1	1
12001	chr1:21730273-21730676	1	0	0	0	1	0	0.333333	0.333333	0.333333	0	1	1
12012	chr1:21758825-21759044	3	1	0	4	2	1	1.83333	1.33333	2.33333	0.514573	0.596623	1
12021	chr1:21814529-21814751	0	1	0	0	1	0	0.333333	0.333333	0.333333	0	1	1
12038	chr1:21847771-21847964	3	1	1	0	1	0	1	1.66667	0.333333	-1	0.21875	0.888084
12039	chr1:21849408-21849716	0	0	0	1	0	0	0.166667	0	0.333333	0.415037	1	1
12045	chr1:21853619-21853935	1	1	0	2	0	1	0.833333	0.666667	1	0.263034	1	1
12049	chr1:21871877-21872280	0	0	0	1	2	1	0.666667	0	1.33333	1.22239	0.125	0.682582
12057	chr1:21878312-21878530	2	1	0	1	4	0	1.33333	1	1.66667	0.415037	0.809635	1
12058	chr1:21878679-21878896	0	0	0	3	2	2	1.16667	0	2.33333	1.73697	0.015625	0.229633
12061	chr1:21882357-21882812	0	0	0	0	0	1	0.166667	0	0.333333	0.415037	1	1
12063	chr1:21886106-21886322	34	17	10	25	14	15	19.1667	20.3333	18	-0.16711	0.802816	1
12069	chr1:21892870-21892954	0	0	0	0	1	0	0.166667	0	0.333333	0.415037	1	1
12072	chr1:21897189-21898089	0	0	0	0	1	0	0.166667	0	0.333333	0.415037	1	1
12085	chr1:21907786-21908018	1	1	1	1	0	0	0.666667	1	0.333333	-0.584963	0.625	1
12107	chr1:21927045-21927302	1	0	0	4	0	0	0.833333	0.333333	1.33333	0.807355	0.660778	1
12170	chr1:22035083-22035302	0	0	0	0	2	0	0.333333	0	0.666667	0.736966	0.666667	1
12172	chr1:22043221-22043445	0	0	0	0	0	1	0.166667	0	0.333333	0.415037	1	1
12176	chr1:22065718-22065936	1	0	0	1	0	0	0.333333	0.333333	0.333333	0	1	1
12178	chr1:22075107-22075328	1	0	0	0	0	0	0.166667	0.333333	0	-0.415037	1	1
12180	chr1:22090008-22090856	2	1	0	2	2	1	1.33333	1	1.66667	0.415037	0.726563	1
12183	chr1:22091671-22092034	2	1	1	1	2	1	1.33333	1.33333	1.33333	0	1	1
12185	chr1:22092217-22092788	2	0	0	1	0	0	0.5	0.666667	0.333333	-0.321928	1	1
12191	chr1:22100887-22101104	2	2	0	2	0	5	1.83333	1.33333	2.33333	0.514573	0.684223	1
12195	chr1:22105368-22105586	1	0	0	0	1	1	0.5	0.333333	0.666667	0.321928	1	1
12197	chr1:22107329-22107547	3	1	1	1	0	0	1	1.66667	0.333333	-1	0.21875	0.888084
12201	chr1:22110475-22110793	3	1	1	0	2	0	1.16667	1.66667	0.666667	-0.678072	0.484103	1
12204	chr1:22114902-22115534	1	1	0	1	2	1	1	0.666667	1.33333	0.485427	0.6875	1
12212	chr1:22134961-22135326	1	0	0	0	0	0	0.166667	0.333333	0	-0.415037	1	1
12213	chr1:22136054-22136371	3	1	0	0	2	2	1.33333	1.33333	1.33333	0	1	1
12217	chr1:22137128-22137324	18	14	9	19	34	19	18.8333	13.6667	24	0.769387	0.0737045	0.548271
12222	chr1:22145544-22145790	1	0	0	0	0	0	0.166667	0.333333	0	-0.415037	1	1
12232	chr1:22163867-22164095	1	0	0	1	0	0	0.333333	0.333333	0.333333	0	1	1
12253	chr1:22194317-22194845	4	0	1	0	0	1	1	1.66667	0.333333	-1	0.43436	1
12289	chr1:22235200-22235525	1	0	0	0	0	0	0.166667	0.333333	0	-0.415037	1	1
12293	chr1:22239256-22239397	3	0	1	1	1	1	1.16667	1.33333	1	-0.222392	1	1
12307	chr1:22252416-22252760	4	0	0	2	4	0	1.66667	1.33333	2	0.36257	0.857092	1
12309	chr1:22255336-22255566	4	1	1	2	2	0	1.66667	2	1.33333	-0.36257	0.784535	1
12329	chr1:22269423-22269697	8	2	1	1	1	1	2.33333	3.66667	1	-1.22239	0.28172	0.956563
12330	chr1:22272155-22272882	1	0	0	0	0	0	0.166667	0.333333	0	-0.415037	1	1
12339	chr1:22287057-22287279	2	1	1	4	0	5	2.16667	1.33333	3	0.777608	0.396363	1
12343	chr1:22291746-22292303	0	0	0	1	0	1	0.333333	0	0.666667	0.736966	0.5	1
12354	chr1:22305659-22305879	2	0	0	0	0	1	0.5	0.666667	0.333333	-0.321928	1	1
12360	chr1:22308312-22308531	0	0	0	1	0	0	0.166667	0	0.333333	0.415037	1	1
12369	chr1:22323773-22324106	10	1	1	6	4	2	4	4	4	0	1	1
12380	chr1:22330292-22330511	1	1	0	0	1	1	0.666667	0.666667	0.666667	0	1	1
12388	chr1:22344608-22344875	1	0	0	0	0	0	0.166667	0.333333	0	-0.415037	1	1
12390	chr1:22349251-22349469	18	8	5	14	14	7	11	10.3333	11.6667	0.160465	0.828021	1
12394	chr1:22351193-22351413	52	16	15	24	20	13	23.3333	27.6667	19	-0.519374	0.51181	1
12397	chr1:22362644-22362868	0	0	0	1	0	0	0.166667	0	0.333333	0.415037	1	1
12399	chr1:22367338-22367402	0	1	0	0	0	1	0.333333	0.333333	0.333333	0	1	1
12402	chr1:22370858-22371068	3	1	0	1	1	3	1.5	1.33333	1.66667	0.192645	1	1
12406	chr1:22377628-22377848	0	0	0	0	0	1	0.166667	0	0.333333	0.415037	1	1
12417	chr1:22385069-22385306	3	2	0	4	2	1	2	1.66667	2.33333	0.321928	0.791252	1
12418	chr1:22387335-22387825	0	0	0	0	0	1	0.166667	0	0.333333	0.415037	1	1
12421	chr1:22388130-22388368	23	13	5	12	11	3	11.1667	13.6667	8.66667	-0.601451	0.434119	1
12423	chr1:22390307-22390584	1	1	0	1	1	1	0.833333	0.666667	1	0.263034	1	1
12425	chr1:22392345-22392593	2	1	0	0	0	1	0.666667	1	0.333333	-0.584963	0.625	1
12428	chr1:22402790-22402875	41	30	45	16	41	24	32.8333	38.6667	27	-0.5025	0.187964	0.887276
12431	chr1:22405725-22405945	1	0	0	1	0	0	0.333333	0.333333	0.333333	0	1	1
12439	chr1:22434186-22434517	1	0	0	0	0	0	0.166667	0.333333	0	-0.415037	1	1
12464	chr1:22472506-22472721	0	0	0	0	1	0	0.166667	0	0.333333	0.415037	1	1
12465	chr1:22481773-22481957	2	2	1	2	0	0	1.16667	1.66667	0.666667	-0.678072	0.453125	1
12482	chr1:22513124-22513911	1	0	0	0	1	1	0.5	0.333333	0.666667	0.321928	1	1
12484	chr1:22518872-22519268	2	1	0	4	2	1	1.66667	1	2.33333	0.736966	0.34375	1
12486	chr1:22520092-22520436	1	0	0	0	0	1	0.333333	0.333333	0.333333	0	1	1
12538	chr1:22632243-22632524	1	1	0	0	4	1	1.16667	0.666667	1.66667	0.678072	0.605225	1
12541	chr1:22638910-22639382	2	1	0	2	1	1	1.16667	1	1.33333	0.222392	1	1
12543	chr1:22640582-22640816	1	1	1	1	2	0	1	1	1	0	1	1
12549	chr1:22657681-22657902	5	1	1	2	15	4	4.66667	2.33333	7	1.26303	0.305692	1
12565	chr1:22681459-22681686	6	1	0	10	7	3	4.5	2.33333	6.66667	1.20163	0.138059	0.728077
12581	chr1:22716383-22717163	0	0	0	0	0	1	0.166667	0	0.333333	0.415037	1	1
12589	chr1:22731966-22732235	7	1	1	1	8	5	3.83333	3	4.66667	0.5025	0.646208	1
12605	chr1:22803886-22804066	1	0	1	0	0	2	0.666667	0.666667	0.666667	0	1	1
12616	chr1:22868468-22868690	0	1	1	3	1	1	1.16667	0.666667	1.66667	0.678072	0.453125	1
12639	chr1:22900565-22900834	1	1	0	1	2	3	1.33333	0.666667	2	0.847997	0.289063	0.956563
12674	chr1:22966290-22966603	11	2	2	7	3	8	5.5	5	6	0.222392	0.845514	1
12704	chr1:23012973-23013049	16	11	14	23	25	26	19.1667	13.6667	24.6667	0.807355	0.0026857	0.073686
12705	chr1:23015402-23015609	1	1	0	6	8	7	3.83333	0.666667	7	2.26303	6.6042e-05	0.00546689
12710	chr1:23023800-23024243	1	1	1	0	1	1	0.833333	1	0.666667	-0.263034	1	1
12728	chr1:23042918-23043487	2	1	0	1	1	0	0.833333	1	0.666667	-0.263034	1	1
12730	chr1:23044972-23045599	2	0	0	2	0	1	0.833333	0.666667	1	0.263034	1	1
12774	chr1:23164968-23165348	1	0	1	1	0	0	0.5	0.666667	0.333333	-0.321928	1	1
12776	chr1:23172603-23172833	6	2	2	3	3	0	2.66667	3.33333	2	-0.530515	0.551858	1
12783	chr1:23185991-23186210	4	1	2	4	1	2	2.33333	2.33333	2.33333	0	1	1
12789	chr1:23190632-23190842	3	1	1	2	0	3	1.66667	1.66667	1.66667	0	1	1
12799	chr1:23214628-23214881	0	0	0	3	0	0	0.5	0	1	1	0.55	1
12800	chr1:23220682-23221014	6	2	1	2	1	1	2.16667	3	1.33333	-0.777608	0.396363	1
12804	chr1:23225405-23225610	1	1	0	0	2	0	0.666667	0.666667	0.666667	0	1	1
12815	chr1:23254467-23254553	18	8	14	35	51	32	26.3333	13.3333	39.3333	1.4926	4.9069e-05	0.00438955
12831	chr1:23287950-23288165	2	1	0	2	6	1	2	1	3	1	0.30704	1
12833	chr1:23290523-23290842	4	1	0	5	2	3	2.5	1.66667	3.33333	0.70044	0.372307	1
12836	chr1:23305377-23305603	0	0	0	0	0	1	0.166667	0	0.333333	0.415037	1	1
12838	chr1:23310955-23311054	0	0	1	0	0	0	0.166667	0.333333	0	-0.415037	1	1
12845	chr1:23321054-23321283	2	0	0	0	0	2	0.666667	0.666667	0.666667	0	1	1
12852	chr1:23337979-23338096	3	3	1	10	17	1	5.83333	2.33333	9.33333	1.63227	0.136244	0.720284
12855	chr1:23347857-23348082	14	1	3	0	11	5	5.66667	6	5.33333	-0.14439	0.950554	1
12858	chr1:23351917-23352133	2	1	0	4	0	0	1.16667	1	1.33333	0.222392	1	1
12861	chr1:23359699-23359939	1	1	0	0	0	0	0.333333	0.666667	0	-0.736966	0.5	1
12864	chr1:23361789-23362010	0	0	0	0	2	1	0.5	0	1	1	0.25	0.888084
12881	chr1:23444288-23444507	1	0	0	2	0	0	0.5	0.333333	0.666667	0.321928	1	1
12888	chr1:23457410-23457636	1	0	0	0	1	3	0.833333	0.333333	1.33333	0.807355	0.491203	1
12896	chr1:23468431-23468655	0	1	0	0	0	0	0.166667	0.333333	0	-0.415037	1	1
12900	chr1:23476164-23476379	6	1	1	4	0	5	2.83333	2.66667	3	0.125531	1	1
12904	chr1:23485203-23485384	0	1	0	1	0	2	0.666667	0.333333	1	0.584963	0.625	1
12909	chr1:23489440-23489657	1	1	0	1	2	3	1.33333	0.666667	2	0.847997	0.289063	0.956563
12924	chr1:23505367-23505572	1	1	0	1	2	0	0.833333	0.666667	1	0.263034	1	1
12925	chr1:23512706-23512925	6	2	1	10	13	8	6.66667	3	10.3333	1.5025	0.000679549	0.0291821
12930	chr1:23532130-23532865	1	1	0	0	0	0	0.333333	0.666667	0	-0.736966	0.5	1
12932	chr1:23539413-23539703	3	1	0	2	0	0	1	1.33333	0.666667	-0.485427	0.772797	1
12955	chr1:23575154-23575219	34	34	52	44	73	70	51.1667	40	62.3333	0.627341	0.0438973	0.421619
12959	chr1:23577033-23577444	2	1	1	6	2	2	2.33333	1.33333	3.33333	0.893085	0.223533	0.888084
12968	chr1:23592600-23593031	1	0	0	0	0	0	0.166667	0.333333	0	-0.415037	1	1
12969	chr1:23597444-23597749	1	1	0	2	0	1	0.833333	0.666667	1	0.263034	1	1
12972	chr1:23602520-23602738	4	2	1	4	6	5	3.66667	2.33333	5	0.847997	0.133801	0.711149
12973	chr1:23611414-23611554	1	1	1	9	0	5	2.83333	1	4.66667	1.5025	0.185443	0.877237
12979	chr1:23626651-23627177	0	0	0	0	0	1	0.166667	0	0.333333	0.415037	1	1
12983	chr1:23641429-23641697	2	0	0	1	0	2	0.833333	0.666667	1	0.263034	1	1
12991	chr1:23657898-23658104	1	0	0	1	1	1	0.666667	0.333333	1	0.584963	0.625	1
12996	chr1:23661504-23661717	0	0	0	0	1	0	0.166667	0	0.333333	0.415037	1	1
13002	chr1:23671909-23672124	3	1	1	0	5	1	1.83333	1.66667	2	0.169925	1	1
13004	chr1:23672261-23672534	0	0	0	1	1	2	0.666667	0	1.33333	1.22239	0.125	0.682582
13009	chr1:23674679-23675087	2	0	0	0	0	0	0.333333	0.666667	0	-0.736966	0.666667	1
13011	chr1:23679398-23679614	1	1	0	0	0	0	0.333333	0.666667	0	-0.736966	0.5	1
13017	chr1:23704405-23704477	0	1	1	2	5	1	1.66667	0.666667	2.66667	1.1375	0.175965	0.856021
13019	chr1:23704693-23704780	3	1	2	3	5	2	2.66667	2	3.33333	0.530515	0.454498	1
13022	chr1:23713307-23713660	1	1	0	0	0	0	0.333333	0.666667	0	-0.736966	0.5	1
13026	chr1:23733233-23733954	1	0	0	1	0	0	0.333333	0.333333	0.333333	0	1	1
13030	chr1:23741609-23741679	7	8	18	8	5	18	10.6667	11	10.3333	-0.0824622	0.950157	1
13040	chr1:23752317-23752535	0	0	0	1	5	1	1.16667	0	2.33333	1.73697	0.099575	0.661423
13051	chr1:23780773-23781084	4	1	1	1	4	0	1.83333	2	1.66667	-0.169925	1	1
13057	chr1:23794024-23794369	0	0	0	1	1	0	0.333333	0	0.666667	0.736966	0.5	1
13060	chr1:23800554-23800760	0	0	0	0	1	0	0.166667	0	0.333333	0.415037	1	1
13062	chr1:23801170-23801385	4	2	1	2	9	4	3.66667	2.33333	5	0.847997	0.301568	0.989649
13063	chr1:23802676-23802763	0	0	0	0	0	1	0.166667	0	0.333333	0.415037	1	1
13067	chr1:23808696-23808939	5	3	1	10	13	6	6.33333	3	9.66667	1.41504	0.0053861	0.121241
13072	chr1:23813435-23814210	0	1	0	0	0	0	0.166667	0.333333	0	-0.415037	1	1
13076	chr1:23815562-23815775	1	1	0	3	2	1	1.33333	0.666667	2	0.847997	0.289063	0.956563
13092	chr1:23844210-23844587	1	0	0	0	0	1	0.333333	0.333333	0.333333	0	1	1
13107	chr1:23866887-23867094	7	5	2	6	5	3	4.66667	4.66667	4.66667	0	1	1
13108	chr1:23867784-23868027	3	2	1	6	5	6	3.83333	2	5.66667	1.152	0.0346897	0.3733
13111	chr1:23872101-23872896	1	1	0	1	0	0	0.5	0.666667	0.333333	-0.321928	1	1
13132	chr1:23908981-23909243	0	0	0	1	0	1	0.333333	0	0.666667	0.736966	0.5	1
13136	chr1:23911610-23911830	0	0	0	2	1	1	0.666667	0	1.33333	1.22239	0.125	0.682582
13138	chr1:23912785-23913110	1	1	0	3	0	0	0.833333	0.666667	1	0.263034	1	1
13140	chr1:23917483-23917904	1	1	0	2	1	1	1	0.666667	1.33333	0.485427	0.6875	1
13147	chr1:23926247-23926483	2	0	0	0	0	0	0.333333	0.666667	0	-0.736966	0.666667	1
13150	chr1:23943376-23943597	1	0	0	0	1	0	0.333333	0.333333	0.333333	0	1	1
13155	chr1:23954619-23954990	0	1	0	1	1	1	0.666667	0.333333	1	0.584963	0.625	1
13157	chr1:23955291-23955510	1	0	1	2	1	1	1	0.666667	1.33333	0.485427	0.6875	1
13160	chr1:23962451-23962913	2	1	1	0	0	0	0.666667	1.33333	0	-1.22239	0.125	0.682582
13162	chr1:23963773-23963977	17	10	5	12	16	8	11.3333	10.6667	12	0.156119	0.811716	1
13168	chr1:23975377-23976004	3	0	0	1	1	0	0.833333	1	0.666667	-0.263034	1	1
13172	chr1:23978560-23978777	1	1	1	2	2	5	2	1	3	1	0.145996	0.752386
13175	chr1:23989416-23990011	0	0	0	1	0	0	0.166667	0	0.333333	0.415037	1	1
13178	chr1:24006224-24006462	8	2	0	5	1	2	3	3.33333	2.66667	-0.241008	0.904913	1
13179	chr1:24007788-24008304	3	1	0	6	3	2	2.5	1.33333	3.66667	1	0.176344	0.856021
13181	chr1:24011794-24012102	1	0	0	0	2	0	0.5	0.333333	0.666667	0.321928	1	1
13187	chr1:24017585-24017832	11	3	0	4	5	1	4	4.66667	3.33333	-0.387023	0.782447	1
13192	chr1:24026837-24027039	3	1	0	8	6	0	3	1.33333	4.66667	1.28011	0.233834	0.888084
13195	chr1:24032104-24032435	0	0	0	1	1	0	0.333333	0	0.666667	0.736966	0.5	1
13197	chr1:24032525-24032736	0	0	0	0	2	0	0.333333	0	0.666667	0.736966	0.666667	1
13203	chr1:24035245-24035607	0	0	0	0	0	1	0.166667	0	0.333333	0.415037	1	1
13207	chr1:24039336-24039801	0	0	0	1	0	0	0.166667	0	0.333333	0.415037	1	1
13209	chr1:24040359-24040582	0	1	0	0	1	0	0.333333	0.333333	0.333333	0	1	1
13222	chr1:24065945-24066326	0	0	0	0	0	1	0.166667	0	0.333333	0.415037	1	1
13233	chr1:24071037-24071184	22	20	8	7	26	8	15.1667	16.6667	13.6667	-0.268489	0.727437	1
13234	chr1:24072409-24072702	3	1	1	0	0	5	1.66667	1.66667	1.66667	0	1	1
13242	chr1:24096317-24096699	0	0	0	0	1	0	0.166667	0	0.333333	0.415037	1	1
13246	chr1:24101575-24101798	2	0	0	3	0	0	0.833333	0.666667	1	0.263034	1	1
13249	chr1:24104049-24104265	7	3	3	1	3	7	4	4.33333	3.66667	-0.192645	0.881429	1
13250	chr1:24108568-24108833	0	0	0	0	0	1	0.166667	0	0.333333	0.415037	1	1
13252	chr1:24114849-24115054	3	0	0	0	1	4	1.33333	1	1.66667	0.415037	0.840688	1
13255	chr1:24116486-24117016	0	0	0	1	2	1	0.666667	0	1.33333	1.22239	0.125	0.682582
13282	chr1:24154980-24155360	1	0	0	0	0	0	0.166667	0.333333	0	-0.415037	1	1
13284	chr1:24161869-24162092	6	3	3	7	3	6	4.66667	4	5.33333	0.341037	0.571588	1
13288	chr1:24165994-24166202	1	1	0	0	1	1	0.666667	0.666667	0.666667	0	1	1
13291	chr1:24177616-24177778	1	1	0	0	0	0	0.333333	0.666667	0	-0.736966	0.5	1
13297	chr1:24187515-24187737	0	1	0	0	3	0	0.666667	0.333333	1	0.584963	0.775401	1
13300	chr1:24190670-24190891	0	0	0	0	0	1	0.166667	0	0.333333	0.415037	1	1
13306	chr1:24203791-24204049	3	1	1	3	2	0	1.66667	1.66667	1.66667	0	1	1
13310	chr1:24210019-24210239	4	1	0	7	2	1	2.5	1.66667	3.33333	0.70044	0.555399	1
13315	chr1:24213489-24213559	0	0	0	0	0	1	0.166667	0	0.333333	0.415037	1	1
13321	chr1:24222090-24222297	5	1	1	8	6	3	4	2.33333	5.66667	1	0.124493	0.682582
13329	chr1:24230756-24231173	0	0	0	0	0	1	0.166667	0	0.333333	0.415037	1	1
13334	chr1:24234074-24234160	0	1	1	1	0	2	0.833333	0.666667	1	0.263034	1	1
13336	chr1:24246133-24246349	3	0	1	1	2	2	1.5	1.33333	1.66667	0.192645	1	1
13338	chr1:24251093-24251748	1	1	0	0	2	0	0.666667	0.666667	0.666667	0	1	1
13341	chr1:24252944-24253030	2	0	0	0	0	1	0.5	0.666667	0.333333	-0.321928	1	1
13343	chr1:24254587-24254958	1	0	0	0	0	0	0.166667	0.333333	0	-0.415037	1	1
13348	chr1:24266426-24266646	5	2	1	13	5	9	5.83333	2.66667	9	1.44746	0.0173673	0.248714
13349	chr1:24274741-24275072	0	0	0	1	1	1	0.5	0	1	1	0.25	0.888084
13358	chr1:24301014-24301243	4	2	1	3	4	1	2.5	2.33333	2.66667	0.137504	1	1
13361	chr1:24309567-24309706	2	1	1	5	6	3	3	1.33333	4.66667	1.28011	0.0308838	0.347026
13363	chr1:24310193-24310726	3	1	0	2	2	2	1.66667	1.33333	2	0.36257	0.753906	1
13365	chr1:24317983-24318615	3	2	0	3	5	2	2.5	1.66667	3.33333	0.70044	0.301758	0.989649
13367	chr1:24318696-24319214	2	0	0	1	1	0	0.666667	0.666667	0.666667	0	1	1
13373	chr1:24347405-24347475	16	9	19	70	59	150	53.8333	14.6667	93	2.58496	0.00169885	0.0554202
13376	chr1:24351490-24351716	2	0	0	0	2	2	1	0.666667	1.33333	0.485427	0.730304	1
13379	chr1:24352547-24352751	0	0	1	0	2	0	0.5	0.333333	0.666667	0.321928	1	1
13381	chr1:24360398-24360614	1	0	0	0	2	1	0.666667	0.333333	1	0.584963	0.625	1
13382	chr1:24361481-24361815	1	1	0	1	1	1	0.833333	0.666667	1	0.263034	1	1
13400	chr1:24403097-24403626	0	1	0	0	0	0	0.166667	0.333333	0	-0.415037	1	1
13421	chr1:24431059-24431209	0	0	0	0	0	1	0.166667	0	0.333333	0.415037	1	1
13424	chr1:24441513-24441918	3	1	1	1	5	3	2.33333	1.66667	3	0.584963	0.455094	1
13429	chr1:24444670-24444873	10	3	3	8	9	3	6	5.33333	6.66667	0.275634	0.739486	1
13438	chr1:24475328-24475529	13	5	2	9	5	3	6.16667	6.66667	5.66667	-0.201634	0.860308	1
13440	chr1:24476712-24477342	0	0	0	0	0	1	0.166667	0	0.333333	0.415037	1	1
13442	chr1:24478346-24478808	4	1	0	2	1	1	1.5	1.66667	1.33333	-0.192645	1	1
13445	chr1:24480151-24480370	1	1	0	0	1	1	0.666667	0.666667	0.666667	0	1	1
13446	chr1:24481092-24481319	3	3	0	2	1	1	1.66667	2	1.33333	-0.36257	0.753906	1
13452	chr1:24502125-24502348	0	0	0	3	4	1	1.33333	0	2.66667	1.87447	0.0078125	0.148452
13465	chr1:24535285-24535719	0	0	0	0	0	1	0.166667	0	0.333333	0.415037	1	1
13469	chr1:24544570-24545399	0	0	0	1	0	0	0.166667	0	0.333333	0.415037	1	1
13471	chr1:24561968-24562243	8	2	1	9	5	6	5.16667	3.66667	6.66667	0.716207	0.284515	0.956563
13477	chr1:24586704-24586928	1	0	1	1	2	0	0.833333	0.666667	1	0.263034	1	1
13484	chr1:24602399-24602898	0	0	0	0	0	1	0.166667	0	0.333333	0.415037	1	1
13493	chr1:24619124-24619370	0	0	0	1	4	0	0.833333	0	1.66667	1.41504	0.251121	0.888084
13495	chr1:24624893-24625112	3	0	0	2	2	2	1.5	1	2	0.584963	0.507813	1
13533	chr1:24698370-24698592	1	1	0	1	0	2	0.833333	0.666667	1	0.263034	1	1
13538	chr1:24700842-24700954	1	1	0	1	2	2	1.16667	0.666667	1.66667	0.678072	0.453125	1
13542	chr1:24722016-24722231	1	0	0	0	2	0	0.5	0.333333	0.666667	0.321928	1	1
13549	chr1:24749774-24750044	1	0	1	1	1	0	0.666667	0.666667	0.666667	0	1	1
13553	chr1:24763445-24763666	0	0	1	1	0	0	0.333333	0.333333	0.333333	0	1	1
13564	chr1:24802645-24802955	1	1	0	1	2	3	1.33333	0.666667	2	0.847997	0.289063	0.956563
13570	chr1:24807384-24807715	4	0	0	0	1	0	0.833333	1.33333	0.333333	-0.807355	0.660778	1
13572	chr1:24812626-24812820	1	0	0	0	0	0	0.166667	0.333333	0	-0.415037	1	1
13590	chr1:24839429-24839651	1	0	0	0	1	2	0.666667	0.333333	1	0.584963	0.625	1
13595	chr1:24845357-24845722	0	0	0	1	0	1	0.333333	0	0.666667	0.736966	0.5	1
13597	chr1:24849647-24849829	2	1	0	2	5	7	2.83333	1	4.66667	1.5025	0.0276614	0.330967
13598	chr1:24859040-24859363	1	0	0	0	1	0	0.333333	0.333333	0.333333	0	1	1
13600	chr1:24860572-24861021	1	0	0	0	0	0	0.166667	0.333333	0	-0.415037	1	1
13603	chr1:24864988-24865175	0	0	0	1	0	0	0.166667	0	0.333333	0.415037	1	1
13605	chr1:24868918-24869137	4	2	0	4	6	2	3	2	4	0.736966	0.307439	1
13621	chr1:24890568-24890928	2	2	0	3	2	1	1.66667	1.33333	2	0.36257	0.753906	1
13626	chr1:24898170-24898454	0	0	0	1	0	0	0.166667	0	0.333333	0.415037	1	1
13628	chr1:24901380-24901597	3	1	1	3	5	1	2.33333	1.66667	3	0.584963	0.455094	1
13633	chr1:24909601-24910131	0	1	0	0	1	0	0.333333	0.333333	0.333333	0	1	1
13640	chr1:24916407-24916880	2	1	0	1	0	0	0.666667	1	0.333333	-0.584963	0.625	1
13647	chr1:24925608-24925695	0	0	0	0	0	1	0.166667	0	0.333333	0.415037	1	1
13651	chr1:24929247-24929455	2	1	0	1	1	2	1.16667	1	1.33333	0.222392	1	1
13653	chr1:24937342-24937509	9	4	3	5	16	2	6.5	5.33333	7.66667	0.452512	0.673204	1
13656	chr1:24939159-24939368	2	1	0	5	9	1	3	1	5	1.58496	0.106882	0.682582
13657	chr1:24939663-24940055	0	0	0	2	1	1	0.666667	0	1.33333	1.22239	0.125	0.682582
13665	chr1:24955714-24955942	8	4	1	10	14	6	7.16667	4.33333	10	1.04439	0.0783783	0.56488
13668	chr1:24956372-24956586	0	0	0	1	0	0	0.166667	0	0.333333	0.415037	1	1
13669	chr1:24958259-24958629	1	0	0	1	0	0	0.333333	0.333333	0.333333	0	1	1
13671	chr1:24961063-24961204	3	1	1	2	6	8	3.5	1.66667	5.33333	1.24793	0.0712401	0.537726
13674	chr1:24967502-24967736	1	1	0	1	0	0	0.5	0.666667	0.333333	-0.321928	1	1
13680	chr1:24985393-24985609	2	1	0	0	0	5	1.33333	1	1.66667	0.415037	0.861619	1
13688	chr1:25010826-25011374	0	0	0	1	0	0	0.166667	0	0.333333	0.415037	1	1
13693	chr1:25012980-25013198	5	0	1	7	1	1	2.5	2	3	0.415037	0.800185	1
13695	chr1:25014173-25014533	0	0	0	1	0	1	0.333333	0	0.666667	0.736966	0.5	1
13700	chr1:25018557-25018692	1	0	0	0	0	1	0.333333	0.333333	0.333333	0	1	1
13703	chr1:25026713-25027097	2	0	0	1	2	0	0.833333	0.666667	1	0.263034	1	1
13708	chr1:25034155-25034615	0	0	0	0	1	0	0.166667	0	0.333333	0.415037	1	1
13713	chr1:25043301-25043520	3	1	1	3	2	1	1.83333	1.66667	2	0.169925	1	1
13720	chr1:25058025-25058396	0	0	0	0	0	1	0.166667	0	0.333333	0.415037	1	1
13725	chr1:25063531-25063740	3	2	1	3	2	1	2	2	2	0	1	1
13726	chr1:25070569-25071105	0	1	0	4	0	0	0.833333	0.333333	1.33333	0.807355	0.660778	1
13739	chr1:25078110-25078279	3	4	2	2	4	1	2.66667	3	2.33333	-0.263034	0.803619	1
13744	chr1:25079307-25079528	1	1	0	3	5	0	1.66667	0.666667	2.66667	1.1375	0.259824	0.908665
13745	chr1:25081482-25081854	0	0	0	0	1	0	0.166667	0	0.333333	0.415037	1	1
13763	chr1:25123538-25123758	1	0	0	0	0	0	0.166667	0.333333	0	-0.415037	1	1
13773	chr1:25158223-25158445	3	1	0	1	0	1	1	1.33333	0.666667	-0.485427	0.730304	1
13886	chr1:25396123-25396380	0	0	0	0	0	2	0.333333	0	0.666667	0.736966	0.666667	1
13894	chr1:25432158-25432305	0	0	0	0	1	0	0.166667	0	0.333333	0.415037	1	1
13900	chr1:25447880-25448099	2	1	1	3	7	0	2.33333	1.33333	3.33333	0.893085	0.422617	1
13909	chr1:25470152-25470489	6	2	2	4	3	2	3.16667	3.33333	3	-0.115477	1	1
13912	chr1:25479084-25479452	0	0	0	1	1	0	0.333333	0	0.666667	0.736966	0.5	1
13914	chr1:25481974-25482195	1	0	0	1	1	1	0.666667	0.333333	1	0.584963	0.625	1
13916	chr1:25492916-25493068	1	0	0	0	4	3	1.33333	0.333333	2.33333	1.32193	0.170281	0.843052
13923	chr1:25505978-25506185	10	5	1	5	5	0	4.33333	5.33333	3.33333	-0.547488	0.595932	1
13926	chr1:25507252-25507484	3	2	2	2	7	5	3.5	2.33333	4.66667	0.765535	0.189247	0.888084
13939	chr1:25535752-25535977	1	0	0	0	0	1	0.333333	0.333333	0.333333	0	1	1
13942	chr1:25536494-25537079	0	0	0	0	1	0	0.166667	0	0.333333	0.415037	1	1
13945	chr1:25539617-25539829	1	1	0	3	0	0	0.833333	0.666667	1	0.263034	1	1
13949	chr1:25546771-25547068	5	2	1	1	15	3	4.5	2.66667	6.33333	1	0.472452	1
13953	chr1:25552050-25552273	1	0	0	1	0	0	0.333333	0.333333	0.333333	0	1	1
13961	chr1:25567459-25567969	0	0	0	1	0	0	0.166667	0	0.333333	0.415037	1	1
13974	chr1:25608819-25609038	0	0	0	0	0	1	0.166667	0	0.333333	0.415037	1	1
13975	chr1:25609039-25609310	1	0	0	0	0	0	0.166667	0.333333	0	-0.415037	1	1
14029	chr1:25684222-25684746	1	0	0	0	1	1	0.5	0.333333	0.666667	0.321928	1	1
14045	chr1:25707486-25707852	2	1	0	0	0	1	0.666667	1	0.333333	-0.584963	0.625	1
14046	chr1:25712831-25713237	1	0	0	0	0	0	0.166667	0.333333	0	-0.415037	1	1
14056	chr1:25737014-25737283	1	0	1	1	2	1	1	0.666667	1.33333	0.485427	0.6875	1
14068	chr1:25770445-25770674	0	0	0	1	0	0	0.166667	0	0.333333	0.415037	1	1
14086	chr1:25823573-25823795	0	0	0	0	0	1	0.166667	0	0.333333	0.415037	1	1
14091	chr1:25841001-25841221	4	2	1	5	2	0	2.33333	2.33333	2.33333	0	1	1
14127	chr1:25909267-25909487	4	1	1	12	11	3	5.33333	2	8.66667	1.68806	0.0270219	0.32654
14130	chr1:25917882-25918095	10	4	2	13	8	5	7	5.33333	8.66667	0.610053	0.371379	1
14132	chr1:25918952-25919173	1	0	1	1	2	2	1.16667	0.666667	1.66667	0.678072	0.453125	1
14133	chr1:25923073-25923298	6	1	1	6	7	3	4	2.66667	5.33333	0.788496	0.255043	0.895957
14136	chr1:25928195-25928454	4	2	1	8	0	3	3	2.33333	3.66667	0.485427	0.696225	1
14161	chr1:25971110-25971437	0	1	0	0	0	0	0.166667	0.333333	0	-0.415037	1	1
14173	chr1:26006647-26006863	1	1	0	6	1	2	1.83333	0.666667	3	1.26303	0.192287	0.888084
14175	chr1:26036330-26036733	0	0	0	0	0	1	0.166667	0	0.333333	0.415037	1	1
14179	chr1:26044160-26044441	1	1	0	0	0	0	0.333333	0.666667	0	-0.736966	0.5	1
14191	chr1:26089643-26089683	1	1	2	0	0	1	0.833333	1.33333	0.333333	-0.807355	0.375	1
14194	chr1:26091221-26091463	2	0	0	0	2	1	0.833333	0.666667	1	0.263034	1	1
14211	chr1:26115353-26115572	1	0	1	10	3	4	3.16667	0.666667	5.66667	2	0.0216006	0.278771
14242	chr1:26166248-26166465	0	1	0	0	0	1	0.333333	0.333333	0.333333	0	1	1
14244	chr1:26170691-26170997	0	1	0	1	0	1	0.5	0.333333	0.666667	0.321928	1	1
14260	chr1:26194902-26195542	2	0	0	0	0	0	0.333333	0.666667	0	-0.736966	0.666667	1
14273	chr1:26221687-26222210	1	0	0	0	1	0	0.333333	0.333333	0.333333	0	1	1
14276	chr1:26228189-26228425	1	0	0	0	0	2	0.5	0.333333	0.666667	0.321928	1	1
14284	chr1:26241726-26241965	0	0	0	0	3	3	1	0	2	1.58496	0.0746606	0.548271
14296	chr1:26251675-26251943	5	2	2	4	0	2	2.5	3	2	-0.415037	0.665456	1
14298	chr1:26261298-26261731	1	0	0	0	0	0	0.166667	0.333333	0	-0.415037	1	1
14336	chr1:26345904-26346250	2	0	1	3	2	1	1.5	1	2	0.584963	0.507813	1
14356	chr1:26374505-26374722	2	1	0	0	1	0	0.666667	1	0.333333	-0.584963	0.625	1
14363	chr1:26398366-26399141	2	0	0	0	0	0	0.333333	0.666667	0	-0.736966	0.666667	1
14365	chr1:26399901-26400589	0	1	0	2	0	1	0.666667	0.333333	1	0.584963	0.625	1
14373	chr1:26418805-26419406	0	0	0	1	1	0	0.333333	0	0.666667	0.736966	0.5	1
14383	chr1:26443300-26443894	1	0	0	0	0	0	0.166667	0.333333	0	-0.415037	1	1
14384	chr1:26443895-26444158	1	1	0	0	0	0	0.333333	0.666667	0	-0.736966	0.5	1
14395	chr1:26467420-26467725	1	1	0	2	0	0	0.666667	0.666667	0.666667	0	1	1
14397	chr1:26468016-26468237	9	3	2	7	4	8	5.5	4.66667	6.33333	0.371969	0.594823	1
14401	chr1:26469073-26469298	1	0	0	12	0	0	2.16667	0.333333	4	1.90689	0.402865	1
14406	chr1:26479433-26479811	1	1	0	2	0	2	1	0.666667	1.33333	0.485427	0.6875	1
14414	chr1:26489929-26490294	1	0	0	2	0	0	0.5	0.333333	0.666667	0.321928	1	1
14423	chr1:26521281-26521499	14	3	2	18	2	7	7.66667	6.33333	9	0.447459	0.709888	1
14426	chr1:26522086-26522308	3	1	1	0	2	0	1.16667	1.66667	0.666667	-0.678072	0.484103	1
14427	chr1:26532190-26532895	1	0	0	1	1	1	0.666667	0.333333	1	0.584963	0.625	1
14431	chr1:26534647-26534998	8	4	2	12	10	3	6.5	4.66667	8.33333	0.719892	0.304606	0.996902
14436	chr1:26540499-26540706	0	1	2	1	3	0	1.16667	1	1.33333	0.222392	1	1
14437	chr1:26543883-26544121	1	1	1	2	6	0	1.83333	1	2.66667	0.874469	0.457469	1
14440	chr1:26546181-26546397	4	2	1	5	8	1	3.5	2.33333	4.66667	0.765535	0.367099	1
14443	chr1:26552483-26552762	14	9	10	13	7	9	10.3333	11	9.66667	-0.169925	0.703537	1
14446	chr1:26553360-26553567	12	4	2	7	2	6	5.5	6	5	-0.222392	0.847809	1
14447	chr1:26555976-26556201	1	0	0	2	2	2	1.16667	0.333333	2	1.16993	0.125	0.682582
14452	chr1:26565936-26566207	0	0	0	1	1	1	0.5	0	1	1	0.25	0.888084
14455	chr1:26572929-26573144	1	0	0	1	0	1	0.5	0.333333	0.666667	0.321928	1	1
14464	chr1:26585994-26586906	1	0	0	0	1	0	0.333333	0.333333	0.333333	0	1	1
14469	chr1:26591568-26591846	1	0	0	0	1	1	0.5	0.333333	0.666667	0.321928	1	1
14476	chr1:26614487-26614561	4	2	4	3	2	5	3.33333	3.33333	3.33333	0	1	1
14486	chr1:26638027-26638318	1	1	0	5	1	1	1.5	0.666667	2.33333	1	0.333338	1
14490	chr1:26646296-26646535	10	3	2	3	2	5	4.16667	5	3.33333	-0.469485	0.621624	1
14499	chr1:26655761-26656328	0	0	0	0	1	0	0.166667	0	0.333333	0.415037	1	1
14500	chr1:26659759-26659981	2	2	1	0	1	3	1.5	1.66667	1.33333	-0.192645	1	1
14509	chr1:26667197-26667457	3	0	0	0	3	2	1.33333	1	1.66667	0.415037	0.809635	1
14526	chr1:26692387-26692595	0	1	0	0	0	2	0.5	0.333333	0.666667	0.321928	1	1
14528	chr1:26695869-26696083	4	1	1	5	6	3	3.33333	2	4.66667	0.917538	0.115318	0.682582
14530	chr1:26699548-26699803	7	5	2	10	10	9	7.16667	4.66667	9.66667	0.912537	0.0315395	0.349976
14535	chr1:26706543-26706760	1	1	0	8	3	2	2.5	0.666667	4.33333	1.67807	0.0616416	0.515357
14536	chr1:26707299-26707632	0	0	0	1	0	0	0.166667	0	0.333333	0.415037	1	1
14539	chr1:26713861-26714564	1	1	0	0	2	1	0.833333	0.666667	1	0.263034	1	1
14540	chr1:26716845-26717288	0	0	0	3	2	2	1.16667	0	2.33333	1.73697	0.015625	0.229633
14545	chr1:26722663-26723014	3	1	0	4	1	2	1.83333	1.33333	2.33333	0.514573	0.596623	1
14548	chr1:26728802-26729053	1	1	0	2	8	4	2.66667	0.666667	4.66667	1.76553	0.0301276	0.347026
14550	chr1:26731407-26731729	0	1	0	0	0	0	0.166667	0.333333	0	-0.415037	1	1
14564	chr1:26744705-26744961	5	3	1	4	2	4	3.16667	3	3.33333	0.115477	1	1
14567	chr1:26749631-26749857	9	3	1	15	9	12	8.16667	4.33333	12	1.2854	0.0113184	0.19614
14569	chr1:26749994-26750218	2	1	1	2	8	1	2.5	1.33333	3.66667	1	0.368407	1
14570	chr1:26757212-26757535	0	0	0	0	1	0	0.166667	0	0.333333	0.415037	1	1
14573	chr1:26757966-26758275	8	3	1	3	1	2	3	4	2	-0.736966	0.444356	1
14589	chr1:26780538-26780822	1	0	0	0	0	0	0.166667	0.333333	0	-0.415037	1	1
14599	chr1:26806846-26807067	2	1	0	2	0	0	0.833333	1	0.666667	-0.263034	1	1
14607	chr1:26815292-26815721	1	0	0	0	0	0	0.166667	0.333333	0	-0.415037	1	1
14613	chr1:26829461-26830145	0	0	0	0	1	0	0.166667	0	0.333333	0.415037	1	1
14617	chr1:26838127-26838347	0	0	0	0	0	1	0.166667	0	0.333333	0.415037	1	1
14624	chr1:26854730-26854931	1	0	0	1	0	1	0.5	0.333333	0.666667	0.321928	1	1
14644	chr1:26887641-26888619	0	0	0	1	0	0	0.166667	0	0.333333	0.415037	1	1
14648	chr1:26889421-26890032	1	0	0	0	0	0	0.166667	0.333333	0	-0.415037	1	1
14649	chr1:26897314-26897537	0	0	0	0	1	1	0.333333	0	0.666667	0.736966	0.5	1
14654	chr1:26915159-26915485	1	0	0	1	0	1	0.5	0.333333	0.666667	0.321928	1	1
14655	chr1:26917719-26918313	1	0	0	1	2	0	0.666667	0.333333	1	0.584963	0.625	1
14659	chr1:26927595-26927815	3	1	0	3	2	1	1.66667	1.33333	2	0.36257	0.753906	1
14661	chr1:26939046-26939265	1	1	1	3	0	1	1.16667	1	1.33333	0.222392	1	1
14664	chr1:26940120-26940338	0	0	0	0	0	1	0.166667	0	0.333333	0.415037	1	1
14669	chr1:26948615-26948838	4	1	1	2	5	6	3.16667	2	4.33333	0.830075	0.199224	0.888084
14672	chr1:26949566-26949893	0	0	0	0	1	0	0.166667	0	0.333333	0.415037	1	1
14675	chr1:26959176-26959519	0	1	1	1	0	0	0.5	0.666667	0.333333	-0.321928	1	1
14677	chr1:26960565-26960788	1	2	0	5	1	0	1.5	1	2	0.584963	0.695999	1
14682	chr1:26968555-26968899	0	0	0	0	1	0	0.166667	0	0.333333	0.415037	1	1
14696	chr1:26992123-26992716	0	0	0	0	1	1	0.333333	0	0.666667	0.736966	0.5	1
14702	chr1:26998138-26998328	2	1	1	1	6	1	2	1.33333	2.66667	0.652077	0.563849	1
14703	chr1:27005180-27005650	0	0	0	1	1	1	0.5	0	1	1	0.25	0.888084
14705	chr1:27008542-27008785	0	1	0	0	2	0	0.5	0.333333	0.666667	0.321928	1	1
14708	chr1:27012651-27012868	3	2	1	3	3	2	2.33333	2	2.66667	0.289507	0.790527	1
14710	chr1:27015961-27016052	0	0	0	0	1	9	1.66667	0	3.33333	2.11548	0.232293	0.888084
14722	chr1:27042331-27042621	0	1	0	0	0	1	0.333333	0.333333	0.333333	0	1	1
14726	chr1:27046133-27046356	3	0	0	0	0	1	0.666667	1	0.333333	-0.584963	0.775401	1
14734	chr1:27065472-27065829	3	0	0	1	0	0	0.666667	1	0.333333	-0.584963	0.775401	1
14735	chr1:27070028-27070247	6	2	2	7	2	1	3.33333	3.33333	3.33333	0	1	1
14737	chr1:27073180-27073457	0	0	0	0	0	1	0.166667	0	0.333333	0.415037	1	1
14739	chr1:27075137-27075580	1	0	0	1	0	1	0.5	0.333333	0.666667	0.321928	1	1
14746	chr1:27082328-27082748	0	0	0	0	1	0	0.166667	0	0.333333	0.415037	1	1
14752	chr1:27091347-27091903	0	1	0	0	1	1	0.5	0.333333	0.666667	0.321928	1	1
14758	chr1:27118912-27119148	0	0	0	0	0	1	0.166667	0	0.333333	0.415037	1	1
14764	chr1:27134302-27134532	1	0	0	1	3	0	0.833333	0.333333	1.33333	0.807355	0.491203	1
14779	chr1:27157367-27157942	2	0	0	0	0	0	0.333333	0.666667	0	-0.736966	0.666667	1
14801	chr1:27192753-27192864	10	3	4	1	8	5	5.16667	5.66667	4.66667	-0.234465	0.825367	1
14803	chr1:27193254-27194057	0	1	0	1	0	0	0.333333	0.333333	0.333333	0	1	1
14805	chr1:27200353-27200570	0	0	1	0	1	0	0.333333	0.333333	0.333333	0	1	1
14808	chr1:27209596-27210455	0	0	0	1	1	0	0.333333	0	0.666667	0.736966	0.5	1
14813	chr1:27220105-27220431	3	1	0	0	0	1	0.833333	1.33333	0.333333	-0.807355	0.491203	1
14817	chr1:27224902-27225470	0	0	0	1	0	0	0.166667	0	0.333333	0.415037	1	1
14819	chr1:27227989-27228211	0	0	0	0	1	0	0.166667	0	0.333333	0.415037	1	1
14820	chr1:27230060-27230426	0	0	0	1	0	0	0.166667	0	0.333333	0.415037	1	1
14824	chr1:27234111-27234594	0	1	0	6	0	0	1.16667	0.333333	2	1.16993	0.542333	1
14831	chr1:27250055-27250557	0	0	0	0	3	0	0.5	0	1	1	0.55	1
14840	chr1:27268487-27268706	0	0	0	1	0	0	0.166667	0	0.333333	0.415037	1	1
14848	chr1:27273048-27273267	1	1	0	0	0	1	0.5	0.666667	0.333333	-0.321928	1	1
14863	chr1:27289827-27290200	0	0	0	2	0	1	0.5	0	1	1	0.25	0.888084
14864	chr1:27294819-27295154	0	1	0	0	0	0	0.166667	0.333333	0	-0.415037	1	1
14869	chr1:27301292-27301660	2	0	0	0	0	0	0.333333	0.666667	0	-0.736966	0.666667	1
14872	chr1:27302796-27303043	0	0	0	1	0	1	0.333333	0	0.666667	0.736966	0.5	1
14874	chr1:27308500-27308709	1	0	0	0	0	0	0.166667	0.333333	0	-0.415037	1	1
14877	chr1:27311748-27311828	2	2	1	2	0	0	1.16667	1.66667	0.666667	-0.678072	0.453125	1
14881	chr1:27316731-27317184	2	0	0	1	1	1	0.833333	0.666667	1	0.263034	1	1
14897	chr1:27339601-27340067	2	1	0	0	2	0	0.833333	1	0.666667	-0.263034	1	1
14900	chr1:27340301-27340797	0	1	0	1	2	0	0.666667	0.333333	1	0.584963	0.625	1
14902	chr1:27344663-27345152	0	0	0	0	0	1	0.166667	0	0.333333	0.415037	1	1
14904	chr1:27346917-27347427	1	1	0	0	1	0	0.5	0.666667	0.333333	-0.321928	1	1
14911	chr1:27354670-27354903	1	1	1	0	1	2	1	1	1	0	1	1
14914	chr1:27356579-27356683	4	2	1	3	3	3	2.66667	2.33333	3	0.263034	0.803619	1
14924	chr1:27367253-27367492	5	2	2	7	4	6	4.33333	3	5.66667	0.736966	0.168638	0.839785
14925	chr1:27378551-27378899	3	1	0	3	2	0	1.5	1.33333	1.66667	0.192645	1	1
14930	chr1:27383139-27383361	1	1	0	1	2	0	0.833333	0.666667	1	0.263034	1	1
14933	chr1:27389348-27389837	1	0	0	2	0	0	0.5	0.333333	0.666667	0.321928	1	1
14937	chr1:27394758-27394998	1	0	0	1	0	0	0.333333	0.333333	0.333333	0	1	1
14945	chr1:27408534-27409057	0	0	0	0	1	0	0.166667	0	0.333333	0.415037	1	1
14949	chr1:27419109-27419326	0	0	1	4	6	1	2	0.333333	3.66667	1.80735	0.0310702	0.347026
14950	chr1:27421709-27421927	7	3	1	6	6	6	4.83333	3.66667	6	0.584963	0.264931	0.915892
14957	chr1:27434651-27434870	0	0	0	1	0	0	0.166667	0	0.333333	0.415037	1	1
14971	chr1:27450411-27450897	5	1	1	5	1	2	2.5	2.33333	2.66667	0.137504	1	1
14992	chr1:27496323-27496563	0	1	0	1	0	1	0.5	0.333333	0.666667	0.321928	1	1
14993	chr1:27498044-27498264	0	0	0	1	3	1	0.833333	0	1.66667	1.41504	0.0625	0.515357
14998	chr1:27501728-27501945	0	0	0	0	1	0	0.166667	0	0.333333	0.415037	1	1
15002	chr1:27517796-27517883	0	0	0	0	0	1	0.166667	0	0.333333	0.415037	1	1
15007	chr1:27532120-27532192	2	3	10	4	19	3	6.83333	5	8.66667	0.688056	0.572148	1
15017	chr1:27558361-27558574	6	3	2	3	5	14	5.5	3.66667	7.33333	0.836501	0.354287	1
15037	chr1:27572154-27572454	1	1	0	1	1	1	0.833333	0.666667	1	0.263034	1	1
15039	chr1:27574303-27574593	3	2	0	1	1	0	1.16667	1.66667	0.666667	-0.678072	0.484103	1
15040	chr1:27578315-27578463	1	1	0	0	0	0	0.333333	0.666667	0	-0.736966	0.5	1
15051	chr1:27595299-27595518	0	1	0	0	0	1	0.333333	0.333333	0.333333	0	1	1
15055	chr1:27619346-27619591	1	0	0	0	0	1	0.333333	0.333333	0.333333	0	1	1
15063	chr1:27639668-27639882	1	1	1	1	2	1	1.16667	1	1.33333	0.222392	1	1
15066	chr1:27649973-27650188	1	1	0	2	4	0	1.33333	0.666667	2	0.847997	0.410222	1
15068	chr1:27650427-27650739	0	0	0	0	0	1	0.166667	0	0.333333	0.415037	1	1
15103	chr1:27701634-27702097	0	1	0	5	3	3	2	0.333333	3.66667	1.80735	0.00634766	0.135302
15108	chr1:27714319-27714540	3	2	1	3	6	6	3.5	2	5	1	0.0783539	0.564743
15121	chr1:27728608-27728834	5	2	2	0	5	5	3.16667	3	3.33333	0.115477	1	1
15128	chr1:27738061-27738281	2	0	0	0	0	0	0.333333	0.666667	0	-0.736966	0.666667	1
15142	chr1:27787493-27787581	1	1	0	1	0	1	0.666667	0.666667	0.666667	0	1	1
15149	chr1:27793905-27794128	0	0	0	2	0	1	0.5	0	1	1	0.25	0.888084
15150	chr1:27797356-27797780	0	0	0	0	1	0	0.166667	0	0.333333	0.415037	1	1
15155	chr1:27805500-27805721	0	0	0	0	0	1	0.166667	0	0.333333	0.415037	1	1
15168	chr1:27822815-27822912	0	0	0	0	1	0	0.166667	0	0.333333	0.415037	1	1
15175	chr1:27830031-27830879	0	0	0	0	1	0	0.166667	0	0.333333	0.415037	1	1
15179	chr1:27838790-27839105	2	1	1	0	0	1	0.833333	1.33333	0.333333	-0.807355	0.375	1
15190	chr1:27857725-27857943	0	1	1	1	1	0	0.666667	0.666667	0.666667	0	1	1
15215	chr1:27907439-27907808	1	1	0	0	1	0	0.5	0.666667	0.333333	-0.321928	1	1
15216	chr1:27911002-27911738	2	1	0	5	2	0	1.66667	1	2.33333	0.736966	0.531396	1
15249	chr1:27958741-27958953	4	2	1	1	3	3	2.33333	2.33333	2.33333	0	1	1
15252	chr1:27962611-27962833	1	1	1	0	4	0	1.16667	1	1.33333	0.222392	1	1
15254	chr1:27968073-27968299	0	0	0	7	8	0	2.5	0	5	2.58496	0.0221256	0.283759
15260	chr1:27984184-27984410	0	0	0	0	1	0	0.166667	0	0.333333	0.415037	1	1
15266	chr1:27988375-27988611	0	1	0	0	7	0	1.33333	0.333333	2.33333	1.32193	0.506178	1
15269	chr1:28001457-28002100	0	0	0	1	0	0	0.166667	0	0.333333	0.415037	1	1
15281	chr1:28028901-28029085	0	0	0	2	3	0	0.833333	0	1.66667	1.41504	0.113277	0.682582
15287	chr1:28041663-28042019	1	0	0	0	0	0	0.166667	0.333333	0	-0.415037	1	1
15290	chr1:28048844-28049066	10	3	2	2	12	3	5.33333	5	5.66667	0.152003	0.936349	1
15291	chr1:28049738-28049986	0	0	0	0	1	1	0.333333	0	0.666667	0.736966	0.5	1
15306	chr1:28060772-28060982	2	1	0	0	0	2	0.833333	1	0.666667	-0.263034	1	1
15313	chr1:28074730-28074946	0	0	0	0	0	1	0.166667	0	0.333333	0.415037	1	1
15329	chr1:28109938-28110157	1	0	0	1	0	0	0.333333	0.333333	0.333333	0	1	1
15330	chr1:28118029-28118419	0	0	0	2	0	0	0.333333	0	0.666667	0.736966	0.666667	1
15336	chr1:28137526-28137754	0	0	0	0	1	0	0.166667	0	0.333333	0.415037	1	1
15342	chr1:28163601-28163866	1	0	0	0	0	0	0.166667	0.333333	0	-0.415037	1	1
15349	chr1:28172394-28172688	1	0	0	0	0	0	0.166667	0.333333	0	-0.415037	1	1
15350	chr1:28174616-28174840	1	1	0	0	0	0	0.333333	0.666667	0	-0.736966	0.5	1
15352	chr1:28175585-28175806	0	0	0	0	0	2	0.333333	0	0.666667	0.736966	0.666667	1
15368	chr1:28197508-28197872	1	0	0	3	1	1	1	0.333333	1.66667	1	0.21875	0.888084
15372	chr1:28202305-28202527	3	2	0	8	5	2	3.33333	1.66667	5	1.16993	0.116568	0.682582
15377	chr1:28214002-28214635	1	0	0	0	0	1	0.333333	0.333333	0.333333	0	1	1
15380	chr1:28217319-28217768	3	2	0	2	1	1	1.5	1.66667	1.33333	-0.192645	1	1
15384	chr1:28226716-28226935	0	0	0	0	0	3	0.5	0	1	1	0.55	1
15396	chr1:28243674-28243751	3	2	1	3	0	3	2	2	2	0	1	1
15407	chr1:28257979-28258201	1	1	0	0	0	0	0.333333	0.666667	0	-0.736966	0.5	1
15412	chr1:28263234-28263456	9	4	3	5	6	2	4.83333	5.33333	4.33333	-0.247928	0.764394	1
15425	chr1:28285769-28285997	7	2	3	3	7	6	4.66667	4	5.33333	0.341037	0.608123	1
15434	chr1:28295678-28295901	0	1	0	1	0	0	0.333333	0.333333	0.333333	0	1	1
15446	chr1:28335958-28336085	0	1	0	0	0	0	0.166667	0.333333	0	-0.415037	1	1
15448	chr1:28341727-28341964	1	1	0	0	0	1	0.5	0.666667	0.333333	-0.321928	1	1
15451	chr1:28346306-28346526	13	6	3	5	0	1	4.66667	7.33333	2	-1.47393	0.120111	0.682582
15453	chr1:28356200-28356415	0	1	0	1	1	1	0.666667	0.333333	1	0.584963	0.625	1
15454	chr1:28364549-28364871	1	1	0	1	4	4	1.83333	0.666667	3	1.26303	0.0654297	0.522112
15465	chr1:28386325-28386721	1	0	0	0	1	1	0.5	0.333333	0.666667	0.321928	1	1
15473	chr1:28415616-28416143	5	1	0	2	2	1	1.83333	2	1.66667	-0.169925	1	1
15475	chr1:28427162-28427401	3	0	0	0	0	2	0.833333	1	0.666667	-0.263034	1	1
15476	chr1:28427833-28428541	0	0	0	1	1	1	0.5	0	1	1	0.25	0.888084
15480	chr1:28432735-28433021	1	0	0	0	1	0	0.333333	0.333333	0.333333	0	1	1
15484	chr1:28440118-28440336	0	0	0	1	0	0	0.166667	0	0.333333	0.415037	1	1
15487	chr1:28448076-28448290	0	1	0	1	9	3	2.33333	0.333333	4.33333	2	0.0947312	0.644079
15489	chr1:28450602-28450846	0	0	0	0	0	1	0.166667	0	0.333333	0.415037	1	1
15490	chr1:28454836-28455354	0	0	0	0	1	0	0.166667	0	0.333333	0.415037	1	1
15494	chr1:28466024-28466418	0	0	1	3	0	1	0.833333	0.333333	1.33333	0.807355	0.491203	1
15496	chr1:28468457-28468794	0	0	0	1	2	2	0.833333	0	1.66667	1.41504	0.0625	0.515357
15499	chr1:28473202-28473666	0	0	0	1	0	0	0.166667	0	0.333333	0.415037	1	1
15503	chr1:28477784-28478001	0	0	0	1	1	0	0.333333	0	0.666667	0.736966	0.5	1
15504	chr1:28478815-28479178	1	0	0	4	4	1	1.66667	0.333333	3	1.58496	0.0214844	0.277552
15513	chr1:28497540-28497758	8	3	2	13	3	9	6.33333	4.33333	8.33333	0.807355	0.28667	0.956563
15518	chr1:28510276-28510322	0	1	0	1	0	1	0.5	0.333333	0.666667	0.321928	1	1
15523	chr1:28514383-28515187	1	0	0	1	1	0	0.5	0.333333	0.666667	0.321928	1	1
15532	chr1:28545716-28545944	0	0	0	1	0	0	0.166667	0	0.333333	0.415037	1	1
15534	chr1:28547486-28547774	1	0	0	0	2	0	0.5	0.333333	0.666667	0.321928	1	1
15536	chr1:28552730-28552938	1	0	0	0	0	0	0.166667	0.333333	0	-0.415037	1	1
15539	chr1:28558372-28558601	1	0	0	0	0	1	0.333333	0.333333	0.333333	0	1	1
15543	chr1:28561253-28561688	2	1	0	0	0	1	0.666667	1	0.333333	-0.584963	0.625	1
15551	chr1:28572104-28572318	4	1	1	2	1	1	1.66667	2	1.33333	-0.36257	0.753906	1
15556	chr1:28578625-28578997	6	1	0	0	2	0	1.5	2.33333	0.666667	-1	0.517553	1
15562	chr1:28583337-28583557	9	3	3	7	0	4	4.33333	5	3.66667	-0.36257	0.729824	1
15570	chr1:28596388-28596786	1	0	0	1	0	1	0.5	0.333333	0.666667	0.321928	1	1
15578	chr1:28621037-28621631	0	0	0	0	0	1	0.166667	0	0.333333	0.415037	1	1
15580	chr1:28626821-28627159	0	1	0	4	0	1	1	0.333333	1.66667	1	0.43436	1
15583	chr1:28630095-28630300	1	0	0	1	0	2	0.666667	0.333333	1	0.584963	0.625	1
15587	chr1:28639070-28640055	1	0	0	0	0	0	0.166667	0.333333	0	-0.415037	1	1
15588	chr1:28645431-28645654	1	1	1	0	0	1	0.666667	1	0.333333	-0.584963	0.625	1
15597	chr1:28657933-28658151	3	1	1	0	0	4	1.5	1.66667	1.33333	-0.192645	1	1
15604	chr1:28664754-28664973	1	2	1	6	5	2	2.83333	1.33333	4.33333	1.19265	0.0490418	0.454557
15606	chr1:28667436-28667506	1	1	1	3	11	10	4.5	1	8	2.16993	0.00378438	0.0954906
15608	chr1:28668772-28669327	1	0	0	0	0	0	0.166667	0.333333	0	-0.415037	1	1
15611	chr1:28675154-28675319	0	1	0	4	1	0	1	0.333333	1.66667	1	0.43436	1
15619	chr1:28678047-28678478	4	1	0	8	4	1	3	1.66667	4.33333	1	0.32214	1
15623	chr1:28683316-28683401	0	0	0	0	0	1	0.166667	0	0.333333	0.415037	1	1
15624	chr1:28683582-28684213	0	0	0	0	0	1	0.166667	0	0.333333	0.415037	1	1
15627	chr1:28684961-28685179	1	0	0	0	0	0	0.166667	0.333333	0	-0.415037	1	1
15629	chr1:28691047-28691335	1	1	0	0	1	0	0.5	0.666667	0.333333	-0.321928	1	1
15631	chr1:28693795-28694013	0	1	0	0	0	3	0.666667	0.333333	1	0.584963	0.775401	1
15633	chr1:28694437-28694790	2	0	0	0	4	0	1	0.666667	1.33333	0.485427	0.839768	1
15659	chr1:28741475-28741696	0	1	0	1	2	4	1.33333	0.333333	2.33333	1.32193	0.0703125	0.533003
15662	chr1:28749391-28749616	3	0	1	0	2	2	1.33333	1.33333	1.33333	0	1	1
15670	chr1:28767000-28767112	0	0	0	0	0	1	0.166667	0	0.333333	0.415037	1	1
15676	chr1:28777415-28777698	1	0	0	0	1	0	0.333333	0.333333	0.333333	0	1	1
15679	chr1:28791602-28791895	4	4	4	4	7	4	4.5	4	5	0.263034	0.701108	1
15681	chr1:28796269-28796494	1	0	0	0	0	1	0.333333	0.333333	0.333333	0	1	1
15692	chr1:28808503-28808723	0	1	0	2	2	3	1.33333	0.333333	2.33333	1.32193	0.0703125	0.533003
15693	chr1:28809125-28809260	3	0	0	1	1	0	0.833333	1	0.666667	-0.263034	1	1
15695	chr1:28811809-28812023	0	0	0	1	0	3	0.666667	0	1.33333	1.22239	0.250526	0.888084
15697	chr1:28814709-28814933	1	1	0	0	1	1	0.666667	0.666667	0.666667	0	1	1
15701	chr1:28819556-28819974	1	1	0	0	1	0	0.5	0.666667	0.333333	-0.321928	1	1
15705	chr1:28828989-28829213	1	0	0	1	4	4	1.66667	0.333333	3	1.58496	0.0214844	0.277552
15708	chr1:28831053-28831570	2	1	0	3	3	1	1.66667	1	2.33333	0.736966	0.34375	1
15713	chr1:28834199-28834429	22	13	11	10	16	9	13.5	15.3333	11.6667	-0.366782	0.408353	1
15714	chr1:28836861-28837040	30	15	11	22	25	20	20.5	18.6667	22.3333	0.24664	0.577076	1
15717	chr1:28838266-28838762	3	1	0	2	3	1	1.66667	1.33333	2	0.36257	0.753906	1
15731	chr1:28854230-28855064	0	0	0	0	2	1	0.5	0	1	1	0.25	0.888084
15745	chr1:28867542-28867866	3	0	0	10	3	5	3.5	1	6	1.80735	0.0312438	0.347026
15752	chr1:28873433-28873940	0	0	0	1	0	1	0.333333	0	0.666667	0.736966	0.5	1
15755	chr1:28878539-28878776	1	1	1	2	1	3	1.5	1	2	0.584963	0.507813	1
15758	chr1:28880415-28880634	5	4	2	2	6	1	3.33333	3.66667	3	-0.222392	0.851299	1
15770	chr1:28899119-28899371	0	0	0	2	1	0	0.5	0	1	1	0.25	0.888084
15774	chr1:28899940-28900209	0	1	0	0	0	1	0.333333	0.333333	0.333333	0	1	1
15785	chr1:28910015-28910234	14	2	1	10	6	3	6	5.66667	6.33333	0.137504	0.944502	1
15796	chr1:28941898-28942115	0	1	0	0	0	0	0.166667	0.333333	0	-0.415037	1	1
15805	chr1:28955942-28956332	1	0	0	0	0	0	0.166667	0.333333	0	-0.415037	1	1
15808	chr1:28957224-28957481	1	0	0	0	0	0	0.166667	0.333333	0	-0.415037	1	1
15810	chr1:28958454-28958952	0	1	0	0	0	0	0.166667	0.333333	0	-0.415037	1	1
15820	chr1:28965397-28965595	1	1	0	1	0	0	0.5	0.666667	0.333333	-0.321928	1	1
15826	chr1:28971869-28972084	1	1	0	4	0	1	1.16667	0.666667	1.66667	0.678072	0.605225	1
15833	chr1:28989261-28990135	0	0	0	0	1	0	0.166667	0	0.333333	0.415037	1	1
15835	chr1:28994062-28994279	1	0	1	1	0	0	0.5	0.666667	0.333333	-0.321928	1	1
15841	chr1:29001324-29001838	0	0	0	0	1	0	0.166667	0	0.333333	0.415037	1	1
15843	chr1:29005516-29006001	1	0	0	0	0	0	0.166667	0.333333	0	-0.415037	1	1
15854	chr1:29017199-29017416	0	0	0	0	1	0	0.166667	0	0.333333	0.415037	1	1
15860	chr1:29020122-29020265	3	1	1	2	3	2	2	1.66667	2.33333	0.321928	0.774414	1
15867	chr1:29026035-29026300	1	1	0	1	1	2	1	0.666667	1.33333	0.485427	0.6875	1
15885	chr1:29047746-29047972	0	0	0	13	0	4	2.83333	0	5.66667	2.73697	0.0775679	0.561208
15886	chr1:29049272-29049543	1	1	0	2	1	1	1	0.666667	1.33333	0.485427	0.6875	1
15888	chr1:29055032-29055298	8	3	1	11	8	3	5.66667	4	7.33333	0.736966	0.337803	1
15895	chr1:29061774-29061992	0	0	0	1	0	0	0.166667	0	0.333333	0.415037	1	1
15904	chr1:29075797-29076043	2	1	0	2	1	0	1	1	1	0	1	1
15906	chr1:29078908-29079158	1	0	0	1	0	1	0.5	0.333333	0.666667	0.321928	1	1
15915	chr1:29088606-29088828	0	1	0	1	0	1	0.5	0.333333	0.666667	0.321928	1	1
15918	chr1:29089428-29089665	4	1	0	2	1	2	1.66667	1.66667	1.66667	0	1	1
15939	chr1:29129957-29130430	1	1	0	3	2	1	1.33333	0.666667	2	0.847997	0.289063	0.956563
15944	chr1:29133798-29134256	0	0	0	1	1	0	0.333333	0	0.666667	0.736966	0.5	1
15953	chr1:29147708-29148135	0	0	0	0	1	0	0.166667	0	0.333333	0.415037	1	1
15963	chr1:29173657-29173742	2	2	0	0	0	4	1.33333	1.33333	1.33333	0	1	1
15974	chr1:29184719-29184936	0	0	0	0	0	1	0.166667	0	0.333333	0.415037	1	1
15984	chr1:29196857-29197068	3	1	0	0	0	0	0.666667	1.33333	0	-1.22239	0.250526	0.888084
15987	chr1:29197916-29198135	2	1	0	6	3	4	2.66667	1	4.33333	1.41504	0.0212708	0.277552
15991	chr1:29204511-29204734	23	10	7	11	16	11	13	13.3333	12.6667	-0.0687128	0.949107	1
16008	chr1:29231041-29231635	0	0	0	1	0	0	0.166667	0	0.333333	0.415037	1	1
16016	chr1:29246069-29246317	1	0	0	0	0	0	0.166667	0.333333	0	-0.415037	1	1
16020	chr1:29249233-29249585	1	0	0	0	0	2	0.5	0.333333	0.666667	0.321928	1	1
16023	chr1:29256137-29256378	0	0	0	0	0	1	0.166667	0	0.333333	0.415037	1	1
16026	chr1:29266786-29267088	0	0	0	0	0	1	0.166667	0	0.333333	0.415037	1	1
16049	chr1:29337293-29337554	0	1	0	5	0	0	1	0.333333	1.66667	1	0.590705	1
16059	chr1:29382128-29382670	0	0	0	0	1	0	0.166667	0	0.333333	0.415037	1	1
16061	chr1:29383554-29383812	0	0	0	3	1	0	0.666667	0	1.33333	1.22239	0.250526	0.888084
16074	chr1:29406724-29407293	0	0	0	0	0	1	0.166667	0	0.333333	0.415037	1	1
16082	chr1:29442757-29443170	0	0	0	1	0	0	0.166667	0	0.333333	0.415037	1	1
16114	chr1:29464370-29464589	2	0	0	11	1	10	4	0.666667	7.33333	2.32193	0.0268455	0.325155
16120	chr1:29478725-29479355	0	0	0	1	0	0	0.166667	0	0.333333	0.415037	1	1
16126	chr1:29498897-29499175	2	1	0	1	0	1	0.833333	1	0.666667	-0.263034	1	1
16129	chr1:29500055-29500310	1	0	0	1	0	1	0.5	0.333333	0.666667	0.321928	1	1
16130	chr1:29500374-29500625	1	0	0	1	1	0	0.5	0.333333	0.666667	0.321928	1	1
16138	chr1:29509149-29509682	2	1	0	2	1	1	1.16667	1	1.33333	0.222392	1	1
16143	chr1:29530602-29530655	0	1	2	0	0	0	0.5	1	0	-1	0.25	0.888084
16182	chr1:29590344-29590610	1	1	0	1	0	1	0.666667	0.666667	0.666667	0	1	1
16197	chr1:29623660-29623882	3	2	0	8	1	8	3.66667	1.66667	5.66667	1.32193	0.131681	0.702144
16207	chr1:29641183-29641403	1	0	0	0	0	4	0.833333	0.333333	1.33333	0.807355	0.660778	1
16236	chr1:29761475-29761697	1	0	1	6	8	2	3	0.666667	5.33333	1.926	0.00981992	0.178455
16282	chr1:30055867-30056138	7	1	1	9	9	4	5.16667	3	7.33333	1.05889	0.11948	0.682582
16297	chr1:30092685-30093079	0	0	0	0	1	0	0.166667	0	0.333333	0.415037	1	1
16300	chr1:30099957-30100360	3	2	0	3	5	6	3.16667	1.66667	4.66667	1.08746	0.0635681	0.519895
16305	chr1:30110568-30111009	3	1	1	3	5	3	2.66667	1.66667	3.66667	0.807355	0.210114	0.888084
16312	chr1:30149625-30149841	2	0	0	2	0	3	1.16667	0.666667	1.66667	0.678072	0.554941	1
16328	chr1:30179577-30179827	5	2	2	1	2	3	2.5	3	2	-0.415037	0.607239	1
16334	chr1:30184196-30184495	1	0	0	1	0	0	0.333333	0.333333	0.333333	0	1	1
16378	chr1:30344445-30345036	0	0	0	1	2	1	0.666667	0	1.33333	1.22239	0.125	0.682582
16406	chr1:30489049-30489303	1	1	0	3	2	0	1.16667	0.666667	1.66667	0.678072	0.484103	1
16408	chr1:30493156-30493406	1	1	0	0	4	0	1	0.666667	1.33333	0.485427	0.823119	1
16451	chr1:30651489-30651709	4	1	0	1	3	2	1.83333	1.66667	2	0.169925	1	1
16463	chr1:30682531-30682788	4	1	0	3	3	2	2.16667	1.66667	2.66667	0.459432	0.59522	1
16464	chr1:30688102-30688368	0	0	0	2	3	2	1.16667	0	2.33333	1.73697	0.015625	0.229633
16526	chr1:30881502-30882268	0	0	0	0	1	0	0.166667	0	0.333333	0.415037	1	1
16538	chr1:30973238-30973463	2	0	0	1	2	1	1	0.666667	1.33333	0.485427	0.6875	1
16545	chr1:30993783-30993963	3	1	1	6	6	5	3.66667	1.66667	5.66667	1.32193	0.0169005	0.243762
16566	chr1:31144341-31144552	4	1	0	8	2	3	3	1.66667	4.33333	1	0.28984	0.958832
16597	chr1:31190595-31190812	6	3	3	4	0	3	3.16667	4	2.33333	-0.584963	0.394695	1
16633	chr1:31263305-31263485	1	0	1	2	0	2	1	0.666667	1.33333	0.485427	0.6875	1
16649	chr1:31295533-31295750	0	0	0	0	1	2	0.5	0	1	1	0.25	0.888084
16653	chr1:31302270-31302491	0	0	0	0	2	2	0.666667	0	1.33333	1.22239	0.125	0.682582
16656	chr1:31304155-31304572	0	0	0	0	1	0	0.166667	0	0.333333	0.415037	1	1
16675	chr1:31330392-31330647	0	1	0	0	0	4	0.833333	0.333333	1.33333	0.807355	0.660778	1
16677	chr1:31335611-31335835	1	1	0	0	0	2	0.666667	0.666667	0.666667	0	1	1
16679	chr1:31335988-31336337	1	0	0	0	0	0	0.166667	0.333333	0	-0.415037	1	1
16694	chr1:31364427-31364624	10	6	4	9	10	4	7.16667	6.66667	7.66667	0.176878	0.795258	1
16700	chr1:31372315-31373100	2	0	0	0	0	0	0.333333	0.666667	0	-0.736966	0.666667	1
16715	chr1:31394699-31394955	2	0	0	0	0	1	0.5	0.666667	0.333333	-0.321928	1	1
16717	chr1:31398322-31398527	2	1	0	1	2	0	1	1	1	0	1	1
16721	chr1:31400949-31401214	9	2	1	2	4	2	3.33333	4	2.66667	-0.447459	0.707524	1
16738	chr1:31496481-31496700	4	1	0	2	0	0	1.16667	1.66667	0.666667	-0.678072	0.643377	1
16740	chr1:31502554-31502980	1	0	1	0	1	0	0.5	0.666667	0.333333	-0.321928	1	1
16745	chr1:31506333-31506663	0	0	0	1	0	1	0.333333	0	0.666667	0.736966	0.5	1
16749	chr1:31512163-31512388	0	0	1	1	1	1	0.666667	0.333333	1	0.584963	0.625	1
16752	chr1:31518616-31519157	1	0	0	0	0	0	0.166667	0.333333	0	-0.415037	1	1
16754	chr1:31519682-31519960	6	2	2	8	1	1	3.33333	3.33333	3.33333	0	1	1
16757	chr1:31524953-31525235	1	0	0	1	0	0	0.333333	0.333333	0.333333	0	1	1
16759	chr1:31525644-31526156	4	1	0	4	1	1	1.83333	1.66667	2	0.169925	1	1
16765	chr1:31543814-31544144	1	0	0	3	1	2	1.16667	0.333333	2	1.16993	0.125	0.682582
16769	chr1:31547643-31548291	0	0	0	1	0	0	0.166667	0	0.333333	0.415037	1	1
16770	chr1:31548409-31548655	1	1	0	2	1	2	1.16667	0.666667	1.66667	0.678072	0.453125	1
16772	chr1:31549482-31549705	0	1	0	0	1	0	0.333333	0.333333	0.333333	0	1	1
16776	chr1:31559559-31560178	0	0	0	1	0	0	0.166667	0	0.333333	0.415037	1	1
16781	chr1:31561822-31562142	1	0	0	0	0	0	0.166667	0.333333	0	-0.415037	1	1
16783	chr1:31569331-31569552	4	3	1	5	6	2	3.5	2.66667	4.33333	0.540568	0.38331	1
16792	chr1:31576704-31576928	0	0	0	1	0	0	0.166667	0	0.333333	0.415037	1	1
16799	chr1:31582265-31582513	1	1	1	2	0	0	0.833333	1	0.666667	-0.263034	1	1
16803	chr1:31585101-31585324	37	11	6	24	25	14	19.5	18	21	0.211504	0.797181	1
16817	chr1:31612816-31613039	1	0	0	0	1	2	0.666667	0.333333	1	0.584963	0.625	1
16820	chr1:31614797-31615211	0	0	0	0	1	1	0.333333	0	0.666667	0.736966	0.5	1
16824	chr1:31619250-31619513	0	1	1	5	5	3	2.5	0.666667	4.33333	1.67807	0.00738525	0.147821
16825	chr1:31619518-31620137	1	0	0	0	1	0	0.333333	0.333333	0.333333	0	1	1
16828	chr1:31621754-31622064	0	0	0	1	0	0	0.166667	0	0.333333	0.415037	1	1
16830	chr1:31622282-31622503	1	1	0	1	1	3	1.16667	0.666667	1.66667	0.678072	0.453125	1
16836	chr1:31629081-31629169	0	0	0	0	1	0	0.166667	0	0.333333	0.415037	1	1
16840	chr1:31631901-31632126	2	2	0	0	1	1	1	1.33333	0.666667	-0.485427	0.6875	1
16841	chr1:31633969-31634190	3	1	0	10	1	3	3	1.33333	4.66667	1.28011	0.291278	0.963092
16851	chr1:31646475-31646693	0	0	0	2	0	2	0.666667	0	1.33333	1.22239	0.125	0.682582
16854	chr1:31666228-31666467	3	1	1	5	4	0	2.33333	1.66667	3	0.584963	0.553288	1
16864	chr1:31678071-31678742	0	0	0	4	1	1	1	0	2	1.58496	0.0746606	0.548271
16865	chr1:31678783-31679006	0	1	0	4	7	0	2	0.333333	3.66667	1.80735	0.114809	0.682582
16867	chr1:31681888-31682146	2	1	1	0	0	1	0.833333	1.33333	0.333333	-0.807355	0.375	1
16877	chr1:31694376-31694690	1	0	0	1	0	0	0.333333	0.333333	0.333333	0	1	1
16879	chr1:31694819-31695037	4	3	1	1	4	2	2.5	2.66667	2.33333	-0.137504	1	1
16896	chr1:31713883-31714144	6	2	1	8	1	5	3.83333	3	4.66667	0.5025	0.604285	1
16907	chr1:31747177-31747400	0	0	0	0	0	1	0.166667	0	0.333333	0.415037	1	1
16909	chr1:31748330-31748552	0	0	1	0	0	0	0.166667	0.333333	0	-0.415037	1	1
16913	chr1:31758184-31758564	2	0	0	0	1	0	0.5	0.666667	0.333333	-0.321928	1	1
16914	chr1:31760480-31760934	3	0	0	2	1	0	1	1	1	0	1	1
16919	chr1:31762763-31762870	15	21	5	8	7	2	9.66667	13.6667	5.66667	-1.1375	0.119768	0.682582
16920	chr1:31767487-31767713	1	1	0	1	0	0	0.5	0.666667	0.333333	-0.321928	1	1
16936	chr1:31860912-31861120	1	0	0	0	0	0	0.166667	0.333333	0	-0.415037	1	1
16941	chr1:31864926-31865176	1	0	1	2	0	1	0.833333	0.666667	1	0.263034	1	1
16947	chr1:31880450-31880678	2	0	1	0	2	1	1	1	1	0	1	1
16953	chr1:31890797-31891016	0	1	0	0	0	0	0.166667	0.333333	0	-0.415037	1	1
16955	chr1:31891316-31891534	3	1	1	1	0	0	1	1.66667	0.333333	-1	0.21875	0.888084
16965	chr1:31919267-31919588	0	1	0	0	1	0	0.333333	0.333333	0.333333	0	1	1
16970	chr1:31932012-31932233	6	2	2	8	6	10	5.66667	3.33333	8	1.05445	0.0243065	0.300443
16972	chr1:31941157-31941376	1	0	0	0	0	0	0.166667	0.333333	0	-0.415037	1	1
16983	chr1:32005329-32005556	0	0	0	1	0	0	0.166667	0	0.333333	0.415037	1	1
16989	chr1:32023660-32023915	2	0	0	0	0	0	0.333333	0.666667	0	-0.736966	0.666667	1
16991	chr1:32026575-32026781	0	0	0	2	0	8	1.66667	0	3.33333	2.11548	0.148856	0.763783
16992	chr1:32033330-32033417	1	0	0	0	0	0	0.166667	0.333333	0	-0.415037	1	1
17006	chr1:32055901-32056695	0	0	0	0	0	1	0.166667	0	0.333333	0.415037	1	1
17007	chr1:32060465-32060736	2	1	0	2	1	0	1	1	1	0	1	1
17009	chr1:32065230-32065742	2	0	0	2	1	0	0.833333	0.666667	1	0.263034	1	1
17018	chr1:32099176-32099480	1	1	0	0	0	1	0.5	0.666667	0.333333	-0.321928	1	1
17122	chr1:32270676-32271176	0	0	0	0	0	1	0.166667	0	0.333333	0.415037	1	1
17135	chr1:32291052-32291404	0	0	0	1	1	0	0.333333	0	0.666667	0.736966	0.5	1
17138	chr1:32294292-32294509	3	1	1	11	3	0	3.16667	1.66667	4.66667	1.08746	0.434486	1
17154	chr1:32337027-32337099	0	0	0	1	3	0	0.666667	0	1.33333	1.22239	0.250526	0.888084
17157	chr1:32342638-32343591	1	0	0	0	0	0	0.166667	0.333333	0	-0.415037	1	1
17158	chr1:32347599-32347822	0	1	0	0	0	0	0.166667	0.333333	0	-0.415037	1	1
17161	chr1:32353781-32354232	1	0	0	1	0	0	0.333333	0.333333	0.333333	0	1	1
17162	chr1:32364406-32364634	1	1	0	0	1	1	0.666667	0.666667	0.666667	0	1	1
17164	chr1:32365656-32366129	0	0	0	1	0	1	0.333333	0	0.666667	0.736966	0.5	1
17172	chr1:32385429-32385651	0	0	0	1	1	0	0.333333	0	0.666667	0.736966	0.5	1
17175	chr1:32389029-32389296	1	0	0	0	0	0	0.166667	0.333333	0	-0.415037	1	1
17176	chr1:32390998-32391285	3	1	2	1	0	1	1.33333	2	0.666667	-0.847997	0.289063	0.956563
17182	chr1:32401783-32401964	18	8	9	8	21	12	12.6667	11.6667	13.6667	0.211504	0.739845	1
17186	chr1:32404619-32404910	2	0	1	1	4	2	1.66667	1	2.33333	0.736966	0.34375	1
17191	chr1:32411596-32411835	1	0	0	0	0	0	0.166667	0.333333	0	-0.415037	1	1
17196	chr1:32416568-32416787	1	1	0	1	0	3	1	0.666667	1.33333	0.485427	0.730304	1
17201	chr1:32430343-32430710	2	1	0	2	1	2	1.33333	1	1.66667	0.415037	0.726563	1
17204	chr1:32432087-32432301	0	0	0	4	0	0	0.666667	0	1.33333	1.22239	0.483516	1
17205	chr1:32434365-32434915	0	0	0	1	0	1	0.333333	0	0.666667	0.736966	0.5	1
17207	chr1:32437282-32437677	3	1	1	5	8	2	3.33333	1.66667	5	1.16993	0.10033	0.665572
17213	chr1:32453535-32453823	0	0	0	0	1	1	0.333333	0	0.666667	0.736966	0.5	1
17217	chr1:32457966-32458188	1	0	0	3	2	1	1.16667	0.333333	2	1.16993	0.125	0.682582
17219	chr1:32470109-32470535	1	1	0	1	0	1	0.666667	0.666667	0.666667	0	1	1
17230	chr1:32484948-32485075	0	1	1	0	0	1	0.5	0.666667	0.333333	-0.321928	1	1
17235	chr1:32487311-32487575	14	3	2	3	2	1	4.16667	6.33333	2	-1.28951	0.299894	0.987593
17237	chr1:32487662-32487762	7	1	1	1	0	1	1.83333	3	0.666667	-1.26303	0.322501	1
17238	chr1:32488010-32488415	3	1	1	2	1	2	1.66667	1.66667	1.66667	0	1	1
17245	chr1:32492489-32492845	1	0	0	2	1	1	0.833333	0.333333	1.33333	0.807355	0.375	1
17246	chr1:32493421-32493642	0	0	0	0	0	1	0.166667	0	0.333333	0.415037	1	1
17251	chr1:32501866-32502083	0	0	0	1	0	0	0.166667	0	0.333333	0.415037	1	1
17257	chr1:32516207-32516421	0	0	0	0	1	0	0.166667	0	0.333333	0.415037	1	1
17268	chr1:32530326-32530572	1	0	0	0	6	0	1.16667	0.333333	2	1.16993	0.542333	1
17269	chr1:32533155-32533392	3	1	0	1	2	3	1.66667	1.33333	2	0.36257	0.753906	1
17271	chr1:32536361-32537163	0	0	0	0	1	1	0.333333	0	0.666667	0.736966	0.5	1
17278	chr1:32544879-32545311	0	0	0	1	0	1	0.333333	0	0.666667	0.736966	0.5	1
17280	chr1:32545464-32545802	1	0	0	0	0	1	0.333333	0.333333	0.333333	0	1	1
17281	chr1:32551056-32551276	1	0	0	1	2	0	0.666667	0.333333	1	0.584963	0.625	1
17296	chr1:32574864-32575097	15	4	4	7	8	5	7.16667	7.66667	6.66667	-0.176878	0.861325	1
17300	chr1:32576069-32576422	1	1	0	1	0	1	0.666667	0.666667	0.666667	0	1	1
17306	chr1:32581862-32581920	7	5	14	2	9	5	7	8.66667	5.33333	-0.610053	0.378511	1
17308	chr1:32585439-32585644	2	1	0	1	0	0	0.666667	1	0.333333	-0.584963	0.625	1
17309	chr1:32587426-32587498	0	0	0	0	0	1	0.166667	0	0.333333	0.415037	1	1
17313	chr1:32599917-32600163	0	1	0	0	2	0	0.5	0.333333	0.666667	0.321928	1	1
17315	chr1:32603432-32603660	1	1	0	1	0	1	0.666667	0.666667	0.666667	0	1	1
17320	chr1:32614252-32614605	2	0	0	0	1	0	0.5	0.666667	0.333333	-0.321928	1	1
17322	chr1:32615827-32616709	1	0	0	1	0	0	0.333333	0.333333	0.333333	0	1	1
17325	chr1:32625368-32625825	0	0	0	0	0	1	0.166667	0	0.333333	0.415037	1	1
17327	chr1:32627824-32628629	1	0	0	0	0	0	0.166667	0.333333	0	-0.415037	1	1
17331	chr1:32647970-32648187	1	0	0	1	0	0	0.333333	0.333333	0.333333	0	1	1
17349	chr1:32690365-32691051	1	0	0	0	1	0	0.333333	0.333333	0.333333	0	1	1
17371	chr1:32712052-32712178	1	0	1	0	0	2	0.666667	0.666667	0.666667	0	1	1
17376	chr1:32718804-32718887	2	1	1	0	4	0	1.33333	1.33333	1.33333	0	1	1
17378	chr1:32718980-32719023	2	1	2	2	18	9	5.66667	1.66667	9.66667	2	0.0730326	0.546255
17385	chr1:32736089-32736402	1	0	0	1	0	0	0.333333	0.333333	0.333333	0	1	1
17395	chr1:32758352-32758846	6	3	2	1	2	2	2.66667	3.66667	1.66667	-0.807355	0.210114	0.888084
17403	chr1:32789092-32789372	3	1	0	4	0	4	2	1.33333	2.66667	0.652077	0.537763	1
17416	chr1:32809909-32810702	1	0	0	0	0	0	0.166667	0.333333	0	-0.415037	1	1
17433	chr1:32835957-32836329	0	1	0	2	0	0	0.5	0.333333	0.666667	0.321928	1	1
17437	chr1:32845949-32846171	1	1	0	0	0	0	0.333333	0.666667	0	-0.736966	0.5	1
17441	chr1:32851623-32851844	3	0	0	3	0	0	1	1	1	0	1	1
17444	chr1:32853036-32853349	0	0	0	1	0	0	0.166667	0	0.333333	0.415037	1	1
17446	chr1:32854649-32854991	0	0	0	1	0	0	0.166667	0	0.333333	0.415037	1	1
17449	chr1:32861306-32861526	7	7	3	7	12	7	7.16667	5.66667	8.66667	0.536053	0.222053	0.888084
17451	chr1:32863537-32863988	2	0	0	1	0	2	0.833333	0.666667	1	0.263034	1	1
17457	chr1:32868944-32869210	1	0	0	0	1	1	0.5	0.333333	0.666667	0.321928	1	1
17458	chr1:32870518-32871187	1	0	0	0	2	0	0.5	0.333333	0.666667	0.321928	1	1
17466	chr1:32885228-32885315	3	2	3	11	5	4	4.66667	2.66667	6.66667	1.06413	0.0929951	0.63718
17473	chr1:32906395-32906630	1	0	0	2	4	1	1.33333	0.333333	2.33333	1.32193	0.0703125	0.533003
17479	chr1:32912835-32913169	1	1	0	0	0	1	0.5	0.666667	0.333333	-0.321928	1	1
17481	chr1:32921077-32921299	1	1	0	1	3	1	1.16667	0.666667	1.66667	0.678072	0.453125	1
17490	chr1:32947976-32948196	0	1	0	8	9	5	3.83333	0.333333	7.33333	2.64386	5.72205e-06	0.000823107
17492	chr1:32965248-32965573	15	5	3	11	7	5	7.66667	7.66667	7.66667	0	1	1
17496	chr1:32969283-32969511	0	0	0	0	1	1	0.333333	0	0.666667	0.736966	0.5	1
17498	chr1:32970136-32970356	0	0	0	0	1	2	0.5	0	1	1	0.25	0.888084
17509	chr1:32986359-32987103	3	0	0	0	2	1	1	1	1	0	1	1
17511	chr1:32994986-32995204	1	1	1	6	2	8	3.16667	1	5.33333	1.66297	0.0177844	0.2539
17524	chr1:33014332-33014713	1	0	0	0	0	0	0.166667	0.333333	0	-0.415037	1	1
17526	chr1:33016261-33016482	0	0	0	1	0	0	0.166667	0	0.333333	0.415037	1	1
17532	chr1:33019176-33019411	2	0	0	0	0	0	0.333333	0.666667	0	-0.736966	0.666667	1
17534	chr1:33020666-33020914	0	1	0	0	1	0	0.333333	0.333333	0.333333	0	1	1
17539	chr1:33024806-33025002	6	3	2	1	2	6	3.33333	3.66667	3	-0.222392	0.865349	1
17542	chr1:33039375-33039601	0	0	0	0	0	1	0.166667	0	0.333333	0.415037	1	1
17545	chr1:33043759-33044168	1	0	0	0	1	0	0.333333	0.333333	0.333333	0	1	1
17546	chr1:33044760-33044976	0	0	0	1	0	1	0.333333	0	0.666667	0.736966	0.5	1
17548	chr1:33047712-33048173	1	0	0	0	0	0	0.166667	0.333333	0	-0.415037	1	1
17552	chr1:33051773-33051844	0	1	0	1	0	0	0.333333	0.333333	0.333333	0	1	1
17559	chr1:33060962-33061573	1	0	0	0	1	0	0.333333	0.333333	0.333333	0	1	1
17565	chr1:33068824-33069042	1	0	0	0	0	0	0.166667	0.333333	0	-0.415037	1	1
17568	chr1:33074271-33074551	1	1	1	1	4	1	1.5	1	2	0.584963	0.507813	1
17572	chr1:33077012-33077437	3	1	0	2	2	1	1.5	1.33333	1.66667	0.192645	1	1
17575	chr1:33078080-33078450	5	1	1	1	2	1	1.83333	2.33333	1.33333	-0.514573	0.632623	1
17579	chr1:33083043-33083257	0	0	0	0	4	1	0.833333	0	1.66667	1.41504	0.251121	0.888084
17584	chr1:33107206-33107446	0	1	0	0	0	0	0.166667	0.333333	0	-0.415037	1	1
17591	chr1:33115359-33115579	10	4	3	3	3	4	4.5	5.66667	3.33333	-0.621488	0.366467	1
17593	chr1:33119353-33120006	1	1	0	2	0	0	0.666667	0.666667	0.666667	0	1	1
17595	chr1:33123547-33123617	0	0	1	0	1	2	0.666667	0.333333	1	0.584963	0.625	1
17602	chr1:33135199-33135416	0	0	0	0	0	1	0.166667	0	0.333333	0.415037	1	1
17608	chr1:33148591-33148807	3	1	1	0	0	0	0.833333	1.66667	0	-1.41504	0.0625	0.515357
17610	chr1:33152569-33153197	0	1	0	1	0	0	0.333333	0.333333	0.333333	0	1	1
17613	chr1:33154633-33155205	0	1	0	2	1	1	0.833333	0.333333	1.33333	0.807355	0.375	1
17614	chr1:33155231-33155466	1	0	0	0	5	0	1	0.333333	1.66667	1	0.590705	1
17621	chr1:33158049-33158528	2	1	0	0	1	0	0.666667	1	0.333333	-0.584963	0.625	1
17623	chr1:33158777-33159074	6	1	1	1	2	3	2.33333	2.66667	2	-0.289507	0.853195	1
17640	chr1:33179341-33179569	0	1	1	1	0	1	0.666667	0.666667	0.666667	0	1	1
17645	chr1:33193733-33194048	2	1	1	3	2	0	1.5	1.33333	1.66667	0.192645	1	1
17649	chr1:33198150-33198507	1	0	0	2	2	1	1	0.333333	1.66667	1	0.21875	0.888084
17650	chr1:33200064-33200298	0	1	0	0	0	0	0.166667	0.333333	0	-0.415037	1	1
17653	chr1:33202193-33202394	9	5	3	17	12	1	7.83333	5.66667	10	0.722466	0.431247	1
17657	chr1:33204870-33205091	0	0	1	0	0	0	0.166667	0.333333	0	-0.415037	1	1
17667	chr1:33211540-33211756	2	1	0	0	0	0	0.5	1	0	-1	0.25	0.888084
17680	chr1:33229266-33229486	0	0	0	0	1	1	0.333333	0	0.666667	0.736966	0.5	1
17691	chr1:33256793-33257327	0	0	0	1	0	0	0.166667	0	0.333333	0.415037	1	1
17693	chr1:33260299-33260529	0	0	0	0	1	0	0.166667	0	0.333333	0.415037	1	1
17704	chr1:33267642-33267954	0	0	0	0	1	0	0.166667	0	0.333333	0.415037	1	1
17711	chr1:33280084-33280331	4	2	1	13	17	5	7	2.33333	11.6667	1.926	0.00786862	0.149408
17716	chr1:33287663-33288142	1	0	1	0	1	0	0.5	0.666667	0.333333	-0.321928	1	1
17721	chr1:33299056-33299126	0	1	1	0	0	1	0.5	0.666667	0.333333	-0.321928	1	1
17724	chr1:33303641-33303859	1	0	0	0	0	0	0.166667	0.333333	0	-0.415037	1	1
17774	chr1:33367468-33367819	0	1	0	0	0	0	0.166667	0.333333	0	-0.415037	1	1
17779	chr1:33374007-33374229	2	0	0	0	0	0	0.333333	0.666667	0	-0.736966	0.666667	1
17781	chr1:33377128-33377346	1	0	1	1	1	1	0.833333	0.666667	1	0.263034	1	1
17783	chr1:33379222-33379496	5	1	1	3	5	1	2.66667	2.33333	3	0.263034	0.852293	1
17785	chr1:33382835-33383054	1	0	1	0	0	2	0.666667	0.666667	0.666667	0	1	1
17786	chr1:33387111-33387665	1	0	0	0	0	0	0.166667	0.333333	0	-0.415037	1	1
17793	chr1:33398949-33399256	0	0	0	1	2	1	0.666667	0	1.33333	1.22239	0.125	0.682582
17794	chr1:33399985-33400206	18	5	3	15	7	6	9	8.66667	9.33333	0.0962153	0.95256	1
17797	chr1:33416534-33416780	3	0	0	1	0	0	0.666667	1	0.333333	-0.584963	0.775401	1
17802	chr1:33423909-33424241	2	1	0	0	0	1	0.666667	1	0.333333	-0.584963	0.625	1
17811	chr1:33441828-33442208	0	1	0	1	1	0	0.5	0.333333	0.666667	0.321928	1	1
17818	chr1:33449497-33449705	0	0	0	0	0	1	0.166667	0	0.333333	0.415037	1	1
17821	chr1:33465256-33465598	0	0	0	0	0	1	0.166667	0	0.333333	0.415037	1	1
17824	chr1:33467953-33468902	0	1	0	0	0	0	0.166667	0.333333	0	-0.415037	1	1
17833	chr1:33504358-33504582	1	1	1	0	0	4	1.16667	1	1.33333	0.222392	1	1
17844	chr1:33524645-33525137	0	0	0	0	4	1	0.833333	0	1.66667	1.41504	0.251121	0.888084
17857	chr1:33550291-33550509	3	1	1	2	3	0	1.66667	1.66667	1.66667	0	1	1
[truncated: 100,421 more rows]

## Sheet: Colon_HCT116
ampID	position	size (bp)	369_normalcolon	544_normalcolon	557_normalcolon	HCT116_r1	HCT116_r2	HCT116_r3	baseMean	baseMeanA	baseMeanB	log2FoldChange2	pval_pooled	padj_pooled
90	chr1:532834-533049	216	8	2	1	7	5	9	5.16667	7	3.33333	-0.884523	0.124662	0.514772
105	chr1:553796-554017	222	0	1	0	0	0	0	0.166667	0	0.333333	0.415037	1	1
115	chr1:647699-647916	218	0	0	0	0	1	1	0.333333	0.666667	0	-0.736966	0.5	1
135	chr1:713050-713269	220	1	0	0	0	0	1	0.166667	0.333333	0	-0.415037	1	1
141	chr1:714699-714925	227	2	0	0	7	1	1	1.5	3	0	-2	0.128143	0.524419
144	chr1:733965-734320	356	0	0	0	0	1	0	0.166667	0.333333	0	-0.415037	1	1
165	chr1:818435-818753	319	2	0	1	0	2	1	0.666667	1	0.333333	-0.584963	0.625	1
173	chr1:830684-830922	239	1	0	1	1	2	1	1.33333	1.33333	1.33333	0	1	1
175	chr1:834500-835047	548	0	0	0	2	3	0	0.833333	1.66667	0	-1.41504	0.113277	0.51305
178	chr1:837868-838078	211	10	5	2	1	3	2	3	2	4	0.736966	0.237885	0.736556
294	chr1:893542-894175	634	1	0	0	1	1	3	1.16667	1.66667	0.666667	-0.678072	0.484103	1
388	chr1:920356-920565	210	11	5	4	4	3	2	4.83333	3	6.66667	0.938599	0.137074	0.553767
392	chr1:921563-921903	341	2	0	0	0	0	0	0.333333	0	0.666667	0.736966	0.666667	1
394	chr1:923133-923351	219	3	1	1	0	0	1	0.833333	0.333333	1.33333	0.807355	0.375	0.986607
398	chr1:927633-927860	228	0	1	0	0	0	0	0.5	0	1	1	0.25	0.736556
417	chr1:937878-938004	127	1	1	1	0	0	0	0.666667	0	1.33333	1.22239	0.125	0.514772
422	chr1:942541-942893	353	2	0	0	0	0	1	1	0.333333	1.66667	1	0.590705	1
424	chr1:943236-943581	346	0	0	0	0	0	0	0.166667	0	0.333333	0.415037	1	1
426	chr1:944301-944579	279	3	0	0	0	0	1	1.66667	0.333333	3	1.58496	0.454297	1
428	chr1:945258-945855	598	3	1	1	1	0	1	1	0.666667	1.33333	0.485427	0.6875	1
489	chr1:992844-993392	549	3	1	0	0	0	0	0.5	0	1	1	0.25	0.736556
496	chr1:995568-996345	778	0	0	0	0	2	0	0.5	0.666667	0.333333	-0.321928	1	1
498	chr1:996448-996661	214	3	1	1	0	0	0	0.5	0	1	1	0.25	0.736556
544	chr1:1032580-1032960	381	0	0	0	0	1	0	0.166667	0.333333	0	-0.415037	1	1
573	chr1:1055922-1056208	287	4	0	0	0	0	0	0.666667	0	1.33333	1.22239	0.483516	1
636	chr1:1094409-1094631	223	21	8	5	0	0	0	5.5	0	11	3.58496	0.00132674	0.0145882
680	chr1:1122320-1122934	615	0	0	0	1	0	0	0.166667	0.333333	0	-0.415037	1	1
687	chr1:1125901-1126051	151	2	1	1	1	1	0	1.5	0.666667	2.33333	1	0.333338	0.924795
689	chr1:1126299-1126510	212	1	0	0	1	0	0	0.166667	0.333333	0	-0.415037	1	1
773	chr1:1197331-1197609	279	2	0	0	1	1	0	0.5	0.666667	0.333333	-0.321928	1	1
777	chr1:1201101-1201327	227	2	0	1	1	0	0	0.5	0.333333	0.666667	0.321928	1	1
795	chr1:1214876-1215093	218	1	1	1	1	0	2	1.16667	1	1.33333	0.222392	1	1
796	chr1:1215413-1215768	356	0	1	0	0	0	1	0.333333	0.333333	0.333333	0	1	1
833	chr1:1251712-1251890	179	0	0	0	1	2	1	0.833333	1.33333	0.333333	-0.807355	0.375	0.986607
835	chr1:1252016-1252228	213	0	0	0	0	1	0	0.333333	0.333333	0.333333	0	1	1
837	chr1:1253737-1253962	226	12	8	6	39	72	39	30.6667	50	11.3333	-2.04793	0.000386704	0.00513451
896	chr1:1292894-1293114	221	27	8	7	0	0	0	4.66667	0	9.33333	3.36923	2.76323e-08	1.30018e-06
900	chr1:1297862-1298085	224	3	1	1	0	0	1	1	0.333333	1.66667	1	0.21875	0.736556
902	chr1:1299374-1299716	343	2	1	1	1	0	0	0.5	0.333333	0.666667	0.321928	1	1
915	chr1:1313660-1313998	339	0	1	0	0	0	1	1	0.333333	1.66667	1	0.43436	1
935	chr1:1338067-1338433	367	3	0	0	0	1	1	0.833333	0.666667	1	0.263034	1	1
939	chr1:1341436-1341655	220	16	8	3	35	33	36	22.6667	34.6667	10.6667	-1.61218	5.7709e-06	0.000134232
947	chr1:1344388-1344454	67	1	1	2	0	0	0	0.833333	0	1.66667	1.41504	0.0625	0.326659
949	chr1:1344532-1344732	201	3	0	0	0	0	0	0.166667	0	0.333333	0.415037	1	1
953	chr1:1352137-1352356	220	1	0	0	2	0	0	0.333333	0.666667	0	-0.736966	0.666667	1
964	chr1:1359255-1359349	95	0	0	0	3	1	1	0.833333	1.66667	0	-1.41504	0.0625	0.326659
990	chr1:1383199-1383423	225	1	2	0	3	0	0	0.833333	1	0.666667	-0.263034	1	1
993	chr1:1386514-1386728	215	15	5	2	9	10	5	7	8	6	-0.36257	0.587244	1
1000	chr1:1388676-1389335	660	1	1	1	1	0	1	0.833333	0.666667	1	0.263034	1	1
1040	chr1:1418299-1418599	301	0	0	0	1	0	0	0.166667	0.333333	0	-0.415037	1	1
1056	chr1:1428027-1428243	217	1	0	0	2	2	1	0.833333	1.66667	0	-1.41504	0.0625	0.326659
1069	chr1:1435371-1435636	266	2	1	0	0	1	1	0.5	0.666667	0.333333	-0.321928	1	1
1070	chr1:1435963-1436261	299	0	0	0	0	0	1	0.166667	0.333333	0	-0.415037	1	1
1073	chr1:1436728-1437195	468	1	1	1	1	2	2	1.33333	1.66667	1	-0.415037	0.726563	1
1076	chr1:1437985-1438267	283	1	0	1	0	0	1	0.333333	0.333333	0.333333	0	1	1
1104	chr1:1456302-1456603	302	0	0	0	1	0	1	0.333333	0.666667	0	-0.736966	0.5	1
1115	chr1:1463433-1463514	82	0	0	0	0	0	0	0.166667	0	0.333333	0.415037	1	1
1160	chr1:1492495-1493102	608	1	0	0	0	1	0	0.166667	0.333333	0	-0.415037	1	1
1165	chr1:1500431-1500677	247	1	0	0	0	3	0	0.5	1	0	-1	0.55	1
1172	chr1:1507268-1507488	221	1	0	0	0	1	0	0.5	0.333333	0.666667	0.321928	1	1
1175	chr1:1511056-1511299	244	6	6	3	9	9	17	8.83333	11.6667	6	-0.85561	0.0908731	0.435235
1181	chr1:1520022-1520239	218	6	1	2	12	3	3	5	6	4	-0.485427	0.678112	1
1183	chr1:1520778-1521155	378	2	0	0	1	2	1	1.66667	1.33333	2	0.36257	0.87812	1
1185	chr1:1521945-1522158	214	3	1	1	1	2	0	1.16667	1	1.33333	0.222392	1	1
1188	chr1:1522864-1523220	357	1	0	0	1	3	1	0.833333	1.66667	0	-1.41504	0.0625	0.326659
1189	chr1:1523221-1523446	226	1	2	0	1	0	1	1.33333	0.666667	2	0.847997	0.410222	1
1194	chr1:1526731-1527054	324	1	1	1	0	3	2	1.33333	1.66667	1	-0.415037	0.726563	1
1260	chr1:1587008-1587261	254	5	2	1	3	0	3	3	2	4	0.736966	0.547919	1
1269	chr1:1591102-1591454	353	3	1	0	6	7	3	3	5.33333	0.666667	-1.926	0.00131226	0.0144425
1271	chr1:1592169-1592946	778	0	0	0	4	1	0	0.833333	1.66667	0	-1.41504	0.251121	0.736556
1281	chr1:1604524-1605033	510	1	0	0	0	0	1	0.333333	0.333333	0.333333	0	1	1
1293	chr1:1610974-1611490	517	1	2	0	1	2	0	1	1	1	0	1	1
1354	chr1:1656391-1656743	353	2	1	0	5	1	2	1.66667	2.66667	0.666667	-1.1375	0.175965	0.680098
1400	chr1:1698447-1698750	304	2	0	0	0	0	2	0.5	0.666667	0.333333	-0.321928	1	1
1401	chr1:1707592-1708136	545	3	0	0	1	1	1	0.666667	1	0.333333	-0.584963	0.625	1
1412	chr1:1716096-1716185	90	11	9	4	0	0	0	6.16667	0	12.3333	3.73697	0.00422756	0.0378659
1420	chr1:1736281-1736525	245	2	1	0	0	0	0	1.16667	0	2.33333	1.73697	0.24568	0.736556
1424	chr1:1745937-1746475	539	0	0	0	0	0	1	0.166667	0.333333	0	-0.415037	1	1
1435	chr1:1756105-1756453	349	3	1	0	0	2	0	1	0.666667	1.33333	0.485427	0.772797	1
1443	chr1:1766201-1766279	79	0	0	0	0	1	0	0.166667	0.333333	0	-0.415037	1	1
1446	chr1:1782324-1782773	450	0	0	0	0	0	2	0.333333	0.666667	0	-0.736966	0.666667	1
1452	chr1:1791606-1792471	866	0	1	0	0	3	0	0.666667	1	0.333333	-0.584963	0.775401	1
1458	chr1:1796317-1796625	309	4	0	1	1	0	2	0.833333	1	0.666667	-0.263034	1	1
1461	chr1:1798074-1798317	244	0	0	0	0	0	1	0.166667	0.333333	0	-0.415037	1	1
1464	chr1:1799708-1799923	216	0	1	0	0	1	0	0.333333	0.333333	0.333333	0	1	1
1465	chr1:1811743-1811949	207	6	5	2	0	0	0	1.66667	0	3.33333	2.11548	0.00195313	0.0199204
1468	chr1:1816215-1816450	236	2	1	1	0	0	1	0.666667	0.333333	1	0.584963	0.625	1
1474	chr1:1818238-1818460	223	4	5	0	0	0	0	1.66667	0	3.33333	2.11548	0.0379267	0.226168
1476	chr1:1819148-1819223	76	0	1	0	0	0	0	0.333333	0	0.666667	0.736966	0.5	1
1477	chr1:1819780-1820201	422	0	0	0	0	0	2	0.333333	0.666667	0	-0.736966	0.666667	1
1493	chr1:1828425-1828824	400	4	0	1	19	27	15	11.5	20.3333	2.66667	-2.54057	3.53808e-06	8.85255e-05
1504	chr1:1839245-1839666	422	0	0	0	0	1	0	0.166667	0.333333	0	-0.415037	1	1
1541	chr1:1872250-1872476	227	1	1	0	0	0	0	0.333333	0	0.666667	0.736966	0.5	1
1549	chr1:1876448-1876670	223	7	1	0	1	0	2	1.16667	1	1.33333	0.222392	1	1
1559	chr1:1880691-1880952	262	3	1	1	8	12	5	4.83333	8.33333	1.33333	-2	0.00060501	0.00746904
1561	chr1:1884828-1885481	654	0	0	0	1	1	1	0.5	1	0	-1	0.25	0.736556
1587	chr1:1903775-1904209	435	0	0	0	0	1	1	0.5	0.666667	0.333333	-0.321928	1	1
1612	chr1:1922873-1922966	94	3	1	1	0	1	0	1	0.333333	1.66667	1	0.21875	0.736556
1614	chr1:1925102-1925345	244	0	0	0	0	1	1	0.333333	0.666667	0	-0.736966	0.5	1
1616	chr1:1926721-1926855	135	1	0	0	0	1	1	0.5	0.666667	0.333333	-0.321928	1	1
1618	chr1:1927052-1927271	220	0	0	0	0	0	0	0.5	0	1	1	0.55	1
1624	chr1:1936092-1936316	225	9	1	2	2	1	4	3.33333	2.33333	4.33333	0.678072	0.586226	1
1626	chr1:1939160-1939372	213	7	2	2	0	1	0	2.16667	0.333333	4	1.90689	0.0722105	0.361473
1628	chr1:1939968-1940188	221	5	1	1	6	5	7	4.16667	6	2.33333	-1.07039	0.0432853	0.248411
1630	chr1:1944170-1944438	269	1	1	1	1	0	0	0.666667	0.333333	1	0.584963	0.625	1
1649	chr1:1957973-1958198	226	3	2	1	2	0	0	2	0.666667	3.33333	1.37851	0.226068	0.736556
1661	chr1:1966260-1966498	239	3	3	1	2	1	2	3.16667	1.66667	4.66667	1.08746	0.332165	0.923496
1666	chr1:1971819-1972039	221	2	1	1	1	0	0	1.33333	0.333333	2.33333	1.32193	0.214843	0.736556
1706	chr1:1996928-1997042	115	0	1	0	0	0	0	0.166667	0	0.333333	0.415037	1	1
1760	chr1:2045888-2046137	250	0	0	0	0	0	0	0.166667	0	0.333333	0.415037	1	1
1775	chr1:2070740-2070952	213	2	1	0	0	1	0	0.5	0.333333	0.666667	0.321928	1	1
1794	chr1:2094999-2095262	264	0	0	0	0	2	1	0.666667	1	0.333333	-0.584963	0.625	1
1813	chr1:2120148-2120368	221	1	1	0	0	0	0	0.5	0	1	1	0.25	0.736556
1819	chr1:2122889-2123104	216	2	0	0	0	0	1	0.333333	0.333333	0.333333	0	1	1
1894	chr1:2175498-2175717	220	0	0	0	0	0	0	0.166667	0	0.333333	0.415037	1	1
1920	chr1:2207045-2207260	216	2	2	1	0	0	0	0.5	0	1	1	0.25	0.736556
1933	chr1:2219521-2219872	352	1	0	0	0	1	0	0.5	0.333333	0.666667	0.321928	1	1
2020	chr1:2293364-2293595	232	2	1	0	0	1	0	0.5	0.333333	0.666667	0.321928	1	1
2069	chr1:2342768-2342990	223	1	1	0	1	1	0	0.5	0.666667	0.333333	-0.321928	1	1
2081	chr1:2352477-2352847	371	1	0	0	1	3	1	1.16667	1.66667	0.666667	-0.678072	0.484103	1
2276	chr1:2510809-2511131	323	3	0	1	1	0	0	0.333333	0.333333	0.333333	0	1	1
2319	chr1:2548475-2548790	316	0	0	0	4	3	4	1.83333	3.66667	0	-2.22239	0.000976563	0.0110988
2373	chr1:2695960-2696299	340	6	1	1	6	14	8	6.66667	9.33333	4	-1.04731	0.1882	0.714623
2760	chr1:3117000-3117217	218	2	2	0	0	0	2	1.5	0.666667	2.33333	1	0.411262	1
2900	chr1:3260291-3260602	312	4	0	1	0	2	6	1.66667	2.66667	0.666667	-1.1375	0.355752	0.970634
2951	chr1:3307493-3307714	222	1	1	1	4	3	4	3	3.66667	2.33333	-0.485427	0.480682	1
2994	chr1:3341735-3342469	735	0	0	0	0	2	0	0.333333	0.666667	0	-0.736966	0.666667	1
3021	chr1:3360139-3360429	291	4	1	1	13	12	8	6.83333	11	2.66667	-1.71049	0.000253831	0.00355164
3238	chr1:3576339-3576552	214	2	1	2	0	1	1	0.833333	0.666667	1	0.263034	1	1
3331	chr1:3674846-3675152	307	1	1	0	8	14	10	6	10.6667	1.33333	-2.32193	1.94158e-06	5.21404e-05
3360	chr1:3709118-3709325	208	0	1	0	0	1	0	0.5	0.333333	0.666667	0.321928	1	1
3363	chr1:3710021-3710683	663	0	0	0	0	0	0	0.166667	0	0.333333	0.415037	1	1
3365	chr1:3711320-3711542	223	2	1	0	0	2	2	0.833333	1.33333	0.333333	-0.807355	0.375	0.986607
3373	chr1:3725747-3726644	898	0	0	0	1	0	0	0.166667	0.333333	0	-0.415037	1	1
3374	chr1:3727172-3727395	224	2	1	0	0	0	0	0.166667	0	0.333333	0.415037	1	1
3376	chr1:3729045-3729328	284	1	1	0	0	1	1	0.5	0.666667	0.333333	-0.321928	1	1
3379	chr1:3729908-3730130	223	0	0	0	0	0	1	0.333333	0.333333	0.333333	0	1	1
3383	chr1:3732346-3732738	393	3	0	0	0	1	1	0.5	0.666667	0.333333	-0.321928	1	1
3391	chr1:3740744-3741067	324	1	0	0	0	2	3	1	1.66667	0.333333	-1	0.288983	0.822298
3397	chr1:3749642-3749859	218	0	0	0	0	1	1	0.333333	0.666667	0	-0.736966	0.5	1
3399	chr1:3756894-3757436	543	1	1	0	2	1	2	1	1.66667	0.333333	-1	0.21875	0.736556
3407	chr1:3764492-3764632	141	0	0	1	0	0	0	0.666667	0	1.33333	1.22239	0.250526	0.736556
3408	chr1:3764802-3765020	219	0	0	0	0	1	0	0.166667	0.333333	0	-0.415037	1	1
3412	chr1:3772684-3772870	187	15	11	7	23	16	17	14.5	18.6667	10.3333	-0.79518	0.00967322	0.0756608
3462	chr1:3814543-3814996	454	0	1	0	1	0	0	0.333333	0.333333	0.333333	0	1	1
3468	chr1:3818543-3818763	221	0	1	0	0	0	0	1	0	2	1.58496	0.249161	0.736556
3479	chr1:3830509-3831410	902	1	0	0	1	0	2	0.5	1	0	-1	0.25	0.736556
3498	chr1:4022612-4023426	815	1	0	0	1	3	1	0.833333	1.66667	0	-1.41504	0.0625	0.326659
3511	chr1:4048944-4049029	86	0	1	1	0	0	0	0.333333	0	0.666667	0.736966	0.5	1
3515	chr1:4059251-4060024	774	0	0	0	3	1	0	0.666667	1.33333	0	-1.22239	0.250526	0.736556
3533	chr1:4114513-4114583	71	5	3	8	6	3	0	5.5	3	8	1.16993	0.158452	0.621189
3551	chr1:4155255-4155546	292	0	0	0	11	3	3	3	5.66667	0.333333	-2.32193	0.0324354	0.197375
3562	chr1:4202535-4203389	855	0	0	0	0	0	2	0.333333	0.666667	0	-0.736966	0.666667	1
3570	chr1:4221061-4221283	223	1	0	0	2	1	2	1.16667	1.66667	0.666667	-0.678072	0.453125	1
3584	chr1:4255876-4256085	210	8	1	2	51	33	31	21.8333	38.3333	5.33333	-2.63472	5.68037e-07	1.80811e-05
3586	chr1:4271126-4271373	248	1	1	0	19	9	3	5.66667	10.3333	1	-2.5025	0.0271006	0.174466
3591	chr1:4279462-4279679	218	1	0	0	17	2	11	5.33333	10	0.666667	-2.72247	0.014943	0.108392
3594	chr1:4287191-4287439	249	3	1	0	23	8	3	6.5	11.3333	1.66667	-2.20945	0.0926895	0.441878
3596	chr1:4290328-4290639	312	1	0	0	12	12	12	6	12	0	-3.70044	2.91039e-11	2.78004e-09
3597	chr1:4313525-4313792	268	0	0	0	13	4	5	4	7.33333	0.666667	-2.32193	0.0143685	0.10447
3606	chr1:4334390-4334673	284	4	0	0	27	21	17	11.8333	21.6667	2	-2.91754	1.10965e-09	7.31759e-08
3624	chr1:4412008-4412509	502	0	0	0	2	1	2	1.5	1.66667	1.33333	-0.192645	1	1
3642	chr1:4467470-4467706	237	1	0	0	6	3	12	3.83333	7	0.666667	-2.26303	0.0136748	0.0998564
3655	chr1:4557814-4558322	509	1	0	0	3	4	5	2	4	0	-2.32193	0.000488281	0.0062079
3678	chr1:4615105-4615649	545	0	0	0	2	0	2	0.666667	1.33333	0	-1.22239	0.125	0.514772
3681	chr1:4623160-4623445	286	1	0	0	15	9	6	5	10	0	-3.45943	5.83534e-06	0.000135671
3697	chr1:4678847-4679095	249	1	1	0	2	2	1	1.16667	1.66667	0.666667	-0.678072	0.453125	1
3733	chr1:4748509-4748756	248	1	1	0	2	1	0	0.833333	1	0.666667	-0.263034	1	1
3766	chr1:4800552-4800770	219	0	0	0	1	1	0	0.333333	0.666667	0	-0.736966	0.5	1
3832	chr1:5056501-5056909	409	2	1	1	13	19	14	8	15.3333	0.666667	-3.29278	8.3631e-12	8.89179e-10
3833	chr1:5078409-5078748	340	2	1	0	7	10	8	4.83333	8.33333	1.33333	-2	0.000103716	0.00165394
3839	chr1:5148089-5148360	272	0	0	0	5	9	11	4.16667	8.33333	0	-3.22239	2.16717e-07	7.85781e-06
3844	chr1:5162509-5162731	223	0	0	0	0	1	0	0.5	0.333333	0.666667	0.321928	1	1
3848	chr1:5194769-5195065	297	1	0	0	25	11	14	8.66667	16.6667	0.666667	-3.40599	7.49066e-06	0.000170636
3853	chr1:5219425-5219912	488	1	0	0	5	5	1	2	3.66667	0.333333	-1.80735	0.0200463	0.136075
3868	chr1:5284460-5284665	206	11	6	2	42	43	42	25.6667	42.3333	9	-2.11548	1.07208e-11	1.10899e-09
3875	chr1:5322716-5322942	227	6	1	1	28	29	24	16	27	5	-2.22239	5.88346e-08	2.48894e-06
3887	chr1:5340011-5340646	636	0	0	0	2	1	0	0.666667	1	0.333333	-0.584963	0.625	1
3891	chr1:5355548-5355847	300	2	0	0	3	2	0	0.833333	1.66667	0	-1.41504	0.113277	0.51305
3900	chr1:5405202-5405422	221	2	0	1	15	15	21	8.83333	17	0.666667	-3.43296	3.17968e-13	4.64064e-11
3902	chr1:5408615-5408834	220	3	1	1	23	24	17	11.1667	21.3333	1	-3.48113	6.80122e-16	1.67296e-13
3903	chr1:5411783-5412017	235	0	0	0	14	5	6	4.33333	8.33333	0.333333	-2.80735	0.00146496	0.0158978
3906	chr1:5432746-5433080	335	0	0	0	6	3	4	2.16667	4.33333	0	-2.41504	0.000244141	0.00342473
3909	chr1:5443838-5444063	226	11	5	2	30	43	44	22.8333	39	6.66667	-2.38333	4.30472e-10	3.15882e-08
3931	chr1:5525019-5525196	178	0	1	0	12	3	2	3	5.66667	0.333333	-2.32193	0.0716076	0.358764
3961	chr1:5583321-5583552	232	3	1	0	20	17	14	9.5	17	2	-2.58496	5.6762e-10	3.99189e-08
3966	chr1:5617912-5618165	254	0	0	0	9	3	12	4.16667	8	0.333333	-2.75489	0.00120749	0.0134376
3967	chr1:5623306-5623343	38	0	0	0	0	0	0	0.166667	0	0.333333	0.415037	1	1
3972	chr1:5652631-5652848	218	1	1	1	21	3	15	7	13	1	-2.80735	0.00841381	0.066661
3977	chr1:5656209-5656432	224	2	2	0	12	11	9	6.33333	10.6667	2	-1.95936	2.43426e-05	0.000473508
4002	chr1:5726649-5726921	273	4	2	1	19	21	13	11.3333	17.6667	5	-1.63743	0.00239095	0.0236917
4013	chr1:5757926-5758033	108	13	12	3	27	11	54	20	30.6667	9.33333	-1.61566	0.0887192	0.426509
4018	chr1:5763971-5764220	250	2	1	0	1	2	1	1	1.33333	0.666667	-0.485427	0.6875	1
4059	chr1:5830191-5830573	383	1	0	0	6	6	3	2.66667	5	0.333333	-2.16993	0.000518799	0.00649348
4066	chr1:5844296-5844486	191	2	0	0	25	13	11	9.16667	16.3333	2	-2.53051	0.000922165	0.0107871
4073	chr1:5871522-5872263	742	1	0	0	9	5	3	2.83333	5.66667	0	-2.73697	0.000398663	0.00527658
4136	chr1:5972302-5972522	221	0	0	0	0	2	0	0.333333	0.666667	0	-0.736966	0.666667	1
4197	chr1:6068385-6068605	221	1	0	0	0	1	0	0.333333	0.333333	0.333333	0	1	1
4216	chr1:6098028-6098250	223	3	3	0	0	0	0	0.666667	0	1.33333	1.22239	0.250526	0.736556
4227	chr1:6121904-6122298	395	0	0	0	0	0	1	0.333333	0.333333	0.333333	0	1	1
4286	chr1:6174631-6174998	368	1	0	0	0	1	1	0.5	0.666667	0.333333	-0.321928	1	1
4288	chr1:6180699-6180887	189	0	0	0	0	2	0	0.5	0.666667	0.333333	-0.321928	1	1
4321	chr1:6218133-6218991	859	0	1	0	0	0	1	0.333333	0.333333	0.333333	0	1	1
4352	chr1:6242220-6242440	221	4	1	0	0	1	1	1.33333	0.666667	2	0.847997	0.537565	1
4353	chr1:6246937-6247598	662	0	1	0	0	0	0	0.333333	0	0.666667	0.736966	0.5	1
4371	chr1:6282184-6282407	224	0	0	0	1	0	0	0.166667	0.333333	0	-0.415037	1	1
4376	chr1:6288496-6288787	292	0	0	0	0	1	0	0.333333	0.333333	0.333333	0	1	1
4377	chr1:6288788-6289017	230	1	0	0	0	1	1	0.5	0.666667	0.333333	-0.321928	1	1
4388	chr1:6296935-6297149	215	5	1	2	5	3	7	3.83333	5	2.66667	-0.710493	0.229339	0.736556
4408	chr1:6315352-6316025	674	1	0	0	3	5	0	1.66667	2.66667	0.666667	-1.1375	0.295229	0.838264
4410	chr1:6316523-6316624	102	0	0	0	0	1	0	0.166667	0.333333	0	-0.415037	1	1
4433	chr1:6335629-6335701	73	2	0	1	0	1	1	2	0.666667	3.33333	1.37851	0.426599	1
4442	chr1:6344474-6344560	87	2	1	1	0	1	0	0.833333	0.333333	1.33333	0.807355	0.375	0.986607
4449	chr1:6358288-6358984	697	1	1	0	0	0	0	0.5	0	1	1	0.25	0.736556
4457	chr1:6381668-6381873	206	1	0	0	0	1	2	0.5	1	0	-1	0.25	0.736556
4460	chr1:6385164-6385382	219	0	0	0	0	0	0	0.166667	0	0.333333	0.415037	1	1
4463	chr1:6387927-6388147	221	0	0	0	0	2	1	0.833333	1	0.666667	-0.263034	1	1
4476	chr1:6401514-6401726	213	0	0	0	0	0	0	0.166667	0	0.333333	0.415037	1	1
4496	chr1:6425531-6425752	222	1	0	0	0	0	0	0.166667	0	0.333333	0.415037	1	1
4507	chr1:6439049-6439473	425	1	1	0	1	1	1	1	1	1	0	1	1
4508	chr1:6441897-6442122	226	1	0	0	0	0	0	0.5	0	1	1	0.55	1
4511	chr1:6443341-6443562	222	0	0	0	0	0	0	0.166667	0	0.333333	0.415037	1	1
4513	chr1:6443858-6444081	224	2	1	0	1	0	1	0.5	0.666667	0.333333	-0.321928	1	1
4517	chr1:6448262-6448485	224	0	1	0	1	0	1	0.833333	0.666667	1	0.263034	1	1
4529	chr1:6458623-6458842	220	1	1	0	1	0	0	0.5	0.333333	0.666667	0.321928	1	1
4530	chr1:6464447-6464692	246	5	2	2	3	2	4	2.83333	3	2.66667	-0.125531	1	1
4558	chr1:6499777-6499993	217	5	1	2	2	1	6	2.66667	3	2.33333	-0.263034	0.852293	1
4605	chr1:6538797-6539009	213	0	1	0	1	0	0	0.666667	0.333333	1	0.584963	0.625	1
4635	chr1:6563561-6563779	219	1	2	1	0	3	1	3.16667	1.33333	5	1.36257	0.358489	0.976246
4645	chr1:6576421-6576641	221	3	1	1	0	0	0	1.5	0	3	2	0.128143	0.524419
4649	chr1:6582862-6583145	284	0	0	0	0	1	2	0.5	1	0	-1	0.25	0.736556
4651	chr1:6583342-6583563	222	1	0	0	1	2	1	0.833333	1.33333	0.333333	-0.807355	0.375	0.986607
4659	chr1:6598388-6598956	569	2	0	1	1	0	2	1	1	1	0	1	1
4662	chr1:6600139-6600494	356	0	1	0	0	0	0	0.166667	0	0.333333	0.415037	1	1
4668	chr1:6610185-6610461	277	0	1	0	0	0	0	0.166667	0	0.333333	0.415037	1	1
4672	chr1:6612965-6613186	222	2	1	1	0	0	1	0.833333	0.333333	1.33333	0.807355	0.375	0.986607
4673	chr1:6613603-6613826	224	15	5	4	29	20	31	16	26.6667	5.33333	-2.12711	3.08563e-10	2.32447e-08
4681	chr1:6627323-6627544	222	0	0	0	5	3	3	2	3.66667	0.333333	-1.80735	0.00634766	0.0537019
4685	chr1:6628164-6628439	276	0	1	0	0	1	0	0.333333	0.333333	0.333333	0	1	1
4688	chr1:6633816-6634031	216	1	0	0	2	3	0	1	1.66667	0.333333	-1	0.288983	0.822298
4708	chr1:6655962-6656383	422	3	1	1	0	1	2	1.33333	1	1.66667	0.415037	0.726563	1
4720	chr1:6665439-6665620	182	4	3	2	1	2	1	4	1.33333	6.66667	1.71621	0.213538	0.736556
4724	chr1:6669202-6669319	118	0	0	0	0	1	1	0.5	0.666667	0.333333	-0.321928	1	1
4726	chr1:6670307-6670674	368	1	0	0	1	2	1	0.666667	1.33333	0	-1.22239	0.125	0.514772
4728	chr1:6671388-6671694	307	4	0	0	1	0	0	0.5	0.333333	0.666667	0.321928	1	1
4731	chr1:6672306-6672533	228	4	2	1	0	0	0	1.16667	0	2.33333	1.73697	0.015625	0.10943
4745	chr1:6677240-6677801	562	5	1	0	0	0	0	0.5	0	1	1	0.25	0.736556
4747	chr1:6679493-6679872	380	0	0	0	0	1	1	0.5	0.666667	0.333333	-0.321928	1	1
4749	chr1:6684426-6684791	366	0	0	0	0	0	1	0.166667	0.333333	0	-0.415037	1	1
4757	chr1:6691390-6692031	642	1	0	0	0	0	0	0.333333	0	0.666667	0.736966	0.666667	1
4768	chr1:6708309-6708680	372	1	1	0	0	1	0	0.5	0.333333	0.666667	0.321928	1	1
4770	chr1:6709146-6709931	786	0	0	0	0	1	2	0.666667	1	0.333333	-0.584963	0.625	1
4777	chr1:6732755-6733321	567	0	0	1	1	0	2	0.833333	1	0.666667	-0.263034	1	1
4782	chr1:6747510-6747965	456	0	1	0	1	0	1	0.666667	0.666667	0.666667	0	1	1
4786	chr1:6752764-6753176	413	0	0	0	0	0	1	0.166667	0.333333	0	-0.415037	1	1
4788	chr1:6753537-6754218	682	1	0	0	1	1	1	0.5	1	0	-1	0.25	0.736556
4796	chr1:6762290-6762360	71	2	3	3	9	2	1	3.33333	4	2.66667	-0.447459	0.699919	1
4804	chr1:6772889-6773255	367	1	0	0	1	0	0	0.166667	0.333333	0	-0.415037	1	1
4807	chr1:6774313-6774543	231	0	0	0	0	0	0	0.166667	0	0.333333	0.415037	1	1
4812	chr1:6780667-6780900	234	1	0	0	0	2	0	0.5	0.666667	0.333333	-0.321928	1	1
4820	chr1:6788414-6788630	217	2	2	1	0	0	1	3.16667	0.333333	6	2.39232	0.179511	0.68611
4823	chr1:6795384-6795626	243	4	6	1	1	0	0	1.83333	0.333333	3.33333	1.70044	0.0569512	0.31484
4827	chr1:6797269-6797903	635	0	0	0	0	1	0	0.333333	0.333333	0.333333	0	1	1
4833	chr1:6805055-6805265	211	1	1	0	0	0	2	0.666667	0.666667	0.666667	0	1	1
4842	chr1:6822860-6823163	304	1	1	0	0	1	0	0.333333	0.333333	0.333333	0	1	1
4851	chr1:6841339-6841552	214	1	0	0	0	1	2	0.666667	1	0.333333	-0.584963	0.625	1
4867	chr1:6863943-6864168	226	0	0	0	0	0	1	0.166667	0.333333	0	-0.415037	1	1
4875	chr1:6897107-6897327	221	1	0	0	0	0	3	0.666667	1	0.333333	-0.584963	0.775401	1
4881	chr1:6907857-6908213	357	0	0	0	0	0	1	0.166667	0.333333	0	-0.415037	1	1
4882	chr1:6920674-6920896	223	1	0	0	16	17	20	8.83333	17.6667	0	-4.22239	2.22045e-16	6.15541e-14
4884	chr1:6921118-6921421	304	7	0	1	6	8	7	4.33333	7	1.66667	-1.58496	0.00249392	0.0245935
4886	chr1:6922116-6922428	313	2	0	1	0	1	1	0.666667	0.666667	0.666667	0	1	1
4888	chr1:6943050-6943532	483	0	0	0	0	0	1	0.166667	0.333333	0	-0.415037	1	1
4890	chr1:6965347-6965715	369	1	0	0	0	0	1	0.333333	0.333333	0.333333	0	1	1
4894	chr1:6974258-6974506	249	0	0	0	0	0	1	0.166667	0.333333	0	-0.415037	1	1
4933	chr1:7057814-7057991	178	7	2	1	9	19	23	10.8333	17	4.66667	-1.66742	0.0155857	0.10943
4949	chr1:7093747-7094014	268	2	0	0	2	1	1	0.666667	1.33333	0	-1.22239	0.125	0.514772
4978	chr1:7171559-7171869	311	7	2	1	10	30	16	13	18.6667	7.33333	-1.23879	0.17738	0.684761
4983	chr1:7186924-7187566	643	0	0	0	0	1	1	0.333333	0.666667	0	-0.736966	0.5	1
4985	chr1:7191107-7191355	249	0	0	0	0	0	0	0.166667	0	0.333333	0.415037	1	1
4988	chr1:7206470-7207408	939	0	0	0	0	0	0	0.166667	0	0.333333	0.415037	1	1
4990	chr1:7217105-7217329	225	1	0	0	12	3	6	3.5	7	0	-3	0.00152725	0.0164544
4995	chr1:7263985-7264228	244	1	1	0	0	0	2	0.5	0.666667	0.333333	-0.321928	1	1
4997	chr1:7274520-7274734	215	2	0	0	1	0	0	1.16667	0.333333	2	1.16993	0.542333	1
5011	chr1:7298645-7298867	223	4	0	1	1	1	1	0.833333	1	0.666667	-0.263034	1	1
5026	chr1:7344357-7344624	268	1	0	0	0	0	1	0.666667	0.333333	1	0.584963	0.775401	1
5031	chr1:7360422-7360661	240	6	1	1	25	14	25	12.1667	21.3333	3	-2.48113	2.02232e-06	5.41146e-05
5037	chr1:7387177-7387391	215	0	0	0	0	0	0	0.5	0	1	1	0.55	1
5120	chr1:7590968-7591186	219	4	2	2	5	8	4	4.83333	5.66667	4	-0.415037	0.569779	1
5131	chr1:7606109-7606445	337	0	0	0	0	0	0	0.166667	0	0.333333	0.415037	1	1
5199	chr1:7743042-7743159	118	0	1	1	3	4	1	1.66667	2.66667	0.666667	-1.1375	0.109375	0.502503
5212	chr1:7767040-7767377	338	0	0	0	0	0	0	0.166667	0	0.333333	0.415037	1	1
5223	chr1:7817539-7817720	182	3	0	1	0	1	1	1.16667	0.666667	1.66667	0.678072	0.605225	1
5233	chr1:7838942-7839179	238	1	0	0	0	0	2	0.333333	0.666667	0	-0.736966	0.666667	1
5243	chr1:7845934-7846239	306	0	0	0	0	0	1	0.333333	0.333333	0.333333	0	1	1
5260	chr1:7923265-7923483	219	0	0	0	3	0	1	0.666667	1.33333	0	-1.22239	0.250526	0.736556
5266	chr1:7927433-7927860	428	0	0	0	1	0	1	0.333333	0.666667	0	-0.736966	0.5	1
5276	chr1:7955133-7955353	221	3	1	1	0	0	0	0.5	0	1	1	0.25	0.736556
5281	chr1:7963540-7963762	223	21	10	5	4	4	4	6.66667	4	9.33333	1.04731	0.0301595	0.191686
5282	chr1:7964667-7964888	222	4	1	1	1	0	1	2	0.666667	3.33333	1.37851	0.318694	0.892723
5287	chr1:7977083-7977636	554	2	1	1	0	2	0	0.666667	0.666667	0.666667	0	1	1
5288	chr1:7984402-7984611	210	0	0	0	0	1	1	0.333333	0.666667	0	-0.736966	0.5	1
5291	chr1:7990123-7990361	239	6	3	1	1	1	0	1.5	0.666667	2.33333	1	0.179688	0.68611
5293	chr1:7993509-7993679	171	4	2	2	1	2	1	3.33333	1.33333	5.33333	1.44057	0.264937	0.771636
5302	chr1:8015181-8015419	239	2	1	0	0	1	1	0.833333	0.666667	1	0.263034	1	1
5306	chr1:8023537-8023750	214	2	1	1	0	0	0	0.5	0	1	1	0.25	0.736556
5309	chr1:8031697-8031917	221	0	0	0	0	0	0	0.166667	0	0.333333	0.415037	1	1
5311	chr1:8032671-8033034	364	1	0	0	1	1	1	0.666667	1	0.333333	-0.584963	0.625	1
5316	chr1:8036874-8037658	785	0	0	0	2	0	2	0.666667	1.33333	0	-1.22239	0.125	0.514772
5330	chr1:8068481-8068701	221	0	1	0	2	1	1	0.833333	1.33333	0.333333	-0.807355	0.375	0.986607
5331	chr1:8069332-8069589	258	0	0	0	2	1	2	0.833333	1.66667	0	-1.41504	0.0625	0.326659
5340	chr1:8089943-8090660	718	1	1	0	0	3	0	0.666667	1	0.333333	-0.584963	0.775401	1
5343	chr1:8105788-8106034	247	2	1	0	19	13	21	9.5	17.6667	1.33333	-3	1.19261e-11	1.224e-09
5346	chr1:8116620-8117261	642	0	0	0	1	1	0	0.5	0.666667	0.333333	-0.321928	1	1
5348	chr1:8118211-8118429	219	1	0	0	0	0	1	0.166667	0.333333	0	-0.415037	1	1
5352	chr1:8125991-8126210	220	0	1	0	0	1	0	0.5	0.333333	0.666667	0.321928	1	1
5357	chr1:8134048-8134442	395	1	0	1	5	3	2	2	3.33333	0.666667	-1.37851	0.0385742	0.2272
5360	chr1:8135420-8136210	791	0	0	0	0	3	1	0.666667	1.33333	0	-1.22239	0.250526	0.736556
5361	chr1:8139743-8139972	230	1	1	0	0	0	0	0.166667	0	0.333333	0.415037	1	1
5364	chr1:8148676-8148975	300	1	1	1	1	2	1	1.5	1.33333	1.66667	0.192645	1	1
5367	chr1:8165986-8166208	223	3	2	1	1	0	0	1	0.333333	1.66667	1	0.21875	0.736556
5369	chr1:8172135-8172358	224	1	0	0	0	0	1	0.166667	0.333333	0	-0.415037	1	1
5375	chr1:8188683-8188905	223	2	1	0	6	6	7	4	6.33333	1.66667	-1.45943	0.00661075	0.0556536
5381	chr1:8196569-8197407	839	0	0	0	0	1	0	0.166667	0.333333	0	-0.415037	1	1
5383	chr1:8199831-8200764	934	0	0	0	1	0	0	0.166667	0.333333	0	-0.415037	1	1
5391	chr1:8211131-8211345	215	0	1	1	0	0	1	0.5	0.333333	0.666667	0.321928	1	1
5395	chr1:8216401-8216690	290	0	0	0	0	1	1	0.5	0.666667	0.333333	-0.321928	1	1
5398	chr1:8220244-8220422	179	0	0	0	1	2	0	0.5	1	0	-1	0.25	0.736556
5404	chr1:8225260-8225998	739	0	0	0	0	1	0	0.166667	0.333333	0	-0.415037	1	1
5407	chr1:8247519-8247738	220	0	0	0	0	1	1	0.5	0.666667	0.333333	-0.321928	1	1
5408	chr1:8247739-8247977	239	3	1	1	0	1	4	2	1.66667	2.33333	0.321928	0.857368	1
5410	chr1:8250438-8250657	220	0	1	0	1	0	0	0.333333	0.333333	0.333333	0	1	1
5418	chr1:8270813-8271042	230	1	1	0	0	1	0	0.333333	0.333333	0.333333	0	1	1
5427	chr1:8285622-8285955	334	1	1	0	1	0	0	0.5	0.333333	0.666667	0.321928	1	1
5429	chr1:8289623-8290052	430	0	0	0	0	2	0	0.333333	0.666667	0	-0.736966	0.666667	1
5436	chr1:8305351-8305891	541	0	0	0	0	0	0	0.166667	0	0.333333	0.415037	1	1
5440	chr1:8309218-8309604	387	1	1	0	0	2	0	0.5	0.666667	0.333333	-0.321928	1	1
5443	chr1:8313276-8313500	225	4	1	1	3	2	0	1.83333	1.66667	2	0.169925	1	1
5447	chr1:8316957-8317228	272	0	1	0	0	1	0	0.333333	0.333333	0.333333	0	1	1
5451	chr1:8321872-8322037	166	1	0	0	0	0	2	0.5	0.666667	0.333333	-0.321928	1	1
5463	chr1:8351557-8351775	219	3	1	1	1	0	2	1.5	1	2	0.584963	0.56862	1
5465	chr1:8352822-8353294	473	1	0	0	1	3	2	1	2	0	-1.58496	0.03125	0.191732
5475	chr1:8387794-8388015	222	1	1	0	0	1	0	0.333333	0.333333	0.333333	0	1	1
5480	chr1:8391946-8392162	217	0	0	0	0	1	0	0.166667	0.333333	0	-0.415037	1	1
5482	chr1:8392665-8392885	221	2	0	1	1	1	0	1.33333	0.666667	2	0.847997	0.537565	1
5490	chr1:8401696-8402191	496	1	1	0	0	0	0	0.166667	0	0.333333	0.415037	1	1
5506	chr1:8427587-8428458	872	1	1	0	0	0	0	0.333333	0	0.666667	0.736966	0.5	1
5509	chr1:8429943-8430161	219	0	1	0	0	1	0	0.333333	0.333333	0.333333	0	1	1
5516	chr1:8445570-8445953	384	0	0	0	0	1	0	0.333333	0.333333	0.333333	0	1	1
5519	chr1:8448473-8448693	221	0	0	0	0	2	0	0.833333	0.666667	1	0.263034	1	1
5520	chr1:8455080-8455459	380	3	0	0	0	0	1	0.5	0.333333	0.666667	0.321928	1	1
5522	chr1:8461354-8461426	73	0	1	0	0	1	0	0.333333	0.333333	0.333333	0	1	1
5527	chr1:8463052-8463272	221	0	0	0	0	0	1	0.166667	0.333333	0	-0.415037	1	1
5528	chr1:8473709-8474039	331	0	0	0	1	1	0	0.333333	0.666667	0	-0.736966	0.5	1
5535	chr1:8486070-8486438	369	0	0	0	0	2	0	0.333333	0.666667	0	-0.736966	0.666667	1
5538	chr1:8493714-8494158	445	0	0	0	0	0	2	0.333333	0.666667	0	-0.736966	0.666667	1
5539	chr1:8496082-8496303	222	3	0	1	0	0	0	0.333333	0	0.666667	0.736966	0.5	1
5541	chr1:8499833-8500058	226	3	1	0	0	0	1	0.666667	0.333333	1	0.584963	0.625	1
5543	chr1:8508717-8508813	97	13	11	7	0	0	0	4.5	0	9	3.32193	1.49012e-08	7.50697e-07
5545	chr1:8513516-8513790	275	2	0	0	1	0	1	0.333333	0.666667	0	-0.736966	0.5	1
5552	chr1:8540293-8540807	515	1	0	0	0	1	0	0.166667	0.333333	0	-0.415037	1	1
5565	chr1:8574492-8574711	220	0	0	0	0	0	1	0.166667	0.333333	0	-0.415037	1	1
5573	chr1:8595682-8596089	408	0	0	0	2	0	2	0.833333	1.33333	0.333333	-0.807355	0.375	0.986607
5578	chr1:8605836-8606424	589	1	0	0	0	1	0	0.166667	0.333333	0	-0.415037	1	1
5583	chr1:8636726-8637152	427	0	0	0	0	0	1	0.333333	0.333333	0.333333	0	1	1
5593	chr1:8670953-8671178	226	0	0	0	0	0	2	0.333333	0.666667	0	-0.736966	0.666667	1
5599	chr1:8713397-8713678	282	0	0	0	0	1	2	0.5	1	0	-1	0.25	0.736556
5608	chr1:8746359-8746733	375	1	1	0	0	0	0	0.333333	0	0.666667	0.736966	0.5	1
5612	chr1:8760067-8760288	222	0	0	0	0	0	1	0.333333	0.333333	0.333333	0	1	1
5622	chr1:8784608-8784812	205	0	0	0	0	1	0	0.333333	0.333333	0.333333	0	1	1
5627	chr1:8787646-8787779	134	0	1	1	0	0	1	0.5	0.333333	0.666667	0.321928	1	1
5631	chr1:8790495-8790936	442	0	0	0	1	1	0	0.333333	0.666667	0	-0.736966	0.5	1
5637	chr1:8807927-8808154	228	1	0	0	0	1	0	0.166667	0.333333	0	-0.415037	1	1
5643	chr1:8820178-8820402	225	0	1	0	0	0	0	0.166667	0	0.333333	0.415037	1	1
5646	chr1:8831120-8831893	774	0	0	0	1	1	0	0.333333	0.666667	0	-0.736966	0.5	1
5652	chr1:8842652-8842889	238	0	0	0	0	1	1	0.333333	0.666667	0	-0.736966	0.5	1
5655	chr1:8845774-8845998	225	1	0	0	0	0	1	0.166667	0.333333	0	-0.415037	1	1
5659	chr1:8855180-8856099	920	0	0	0	0	1	0	0.166667	0.333333	0	-0.415037	1	1
5663	chr1:8859146-8859472	327	0	0	0	0	1	1	0.333333	0.666667	0	-0.736966	0.5	1
5668	chr1:8868895-8869121	227	3	2	1	0	1	0	1.16667	0.333333	2	1.16993	0.125	0.514772
5681	chr1:8883588-8883879	292	2	1	1	1	0	0	1	0.333333	1.66667	1	0.21875	0.736556
5685	chr1:8885443-8885772	330	1	1	0	0	3	0	0.833333	1	0.666667	-0.263034	1	1
5687	chr1:8889955-8890473	519	0	0	0	0	0	1	0.166667	0.333333	0	-0.415037	1	1
5689	chr1:8890616-8891000	385	7	1	1	1	0	1	3.33333	0.666667	6	2.07039	0.293442	0.834004
5699	chr1:8906827-8907641	815	0	0	0	2	1	1	0.666667	1.33333	0	-1.22239	0.125	0.514772
5703	chr1:8909834-8910053	220	1	1	1	0	0	1	1	0.333333	1.66667	1	0.21875	0.736556
5704	chr1:8913340-8913582	243	0	0	0	1	2	0	0.5	1	0	-1	0.25	0.736556
5712	chr1:8936656-8936781	126	8	8	5	96	38	48	35.5	60.6667	10.3333	-2.44392	0.0018435	0.0192578
5721	chr1:8941146-8941368	223	0	1	0	4	0	2	2.5	2	3	0.415037	0.820305	1
5726	chr1:8943248-8943465	218	1	1	0	0	1	0	0.833333	0.333333	1.33333	0.807355	0.491203	1
5735	chr1:8955543-8955747	205	1	0	0	0	0	0	0.166667	0	0.333333	0.415037	1	1
5739	chr1:8961405-8961794	390	0	0	0	1	0	2	0.5	1	0	-1	0.25	0.736556
5740	chr1:8963289-8963507	219	0	0	1	0	1	2	0.666667	1	0.333333	-0.584963	0.625	1
5746	chr1:8969534-8969801	268	0	0	0	0	1	0	0.166667	0.333333	0	-0.415037	1	1
5763	chr1:9000821-9001142	322	1	0	1	0	0	2	0.5	0.666667	0.333333	-0.321928	1	1
5766	chr1:9006190-9006520	331	0	0	0	0	0	0	0.166667	0	0.333333	0.415037	1	1
5774	chr1:9024400-9024630	231	6	1	2	1	0	0	1.33333	0.333333	2.33333	1.32193	0.0703125	0.354019
5777	chr1:9025652-9025870	219	3	2	1	1	0	0	1	0.333333	1.66667	1	0.21875	0.736556
5779	chr1:9029852-9030189	338	3	2	0	1	0	1	1.66667	0.666667	2.66667	1.1375	0.355752	0.970634
5783	chr1:9032442-9032666	225	3	1	1	2	3	2	1.66667	2.33333	1	-0.736966	0.34375	0.94449
5785	chr1:9038400-9038620	221	0	0	0	0	1	0	0.166667	0.333333	0	-0.415037	1	1
5787	chr1:9042532-9043093	562	1	0	0	0	0	0	0.166667	0	0.333333	0.415037	1	1
5791	chr1:9047375-9047599	225	24	7	4	21	33	22	19	25.3333	12.6667	-0.946229	0.126567	0.520368
5802	chr1:9067891-9068834	944	1	0	0	0	0	1	0.166667	0.333333	0	-0.415037	1	1
5809	chr1:9076929-9077303	375	1	0	0	0	2	1	0.833333	1	0.666667	-0.263034	1	1
5814	chr1:9081162-9082094	933	0	0	0	1	1	1	0.5	1	0	-1	0.25	0.736556
5816	chr1:9084008-9084281	274	3	1	0	7	6	3	4.5	5.33333	3.66667	-0.440573	0.701563	1
5818	chr1:9087047-9087406	360	2	0	0	1	0	0	0.333333	0.333333	0.333333	0	1	1
5821	chr1:9096492-9096824	333	0	1	1	1	1	0	0.666667	0.666667	0.666667	0	1	1
5828	chr1:9105544-9105853	310	3	1	1	1	2	1	1.16667	1.33333	1	-0.222392	1	1
5830	chr1:9113645-9113857	213	1	1	1	2	4	2	2.33333	2.66667	2	-0.289507	0.790527	1
5832	chr1:9115277-9115500	224	3	1	1	1	1	2	1.83333	1.33333	2.33333	0.514573	0.632623	1
5837	chr1:9123848-9124261	414	1	0	0	1	0	0	0.166667	0.333333	0	-0.415037	1	1
5838	chr1:9124648-9125036	389	1	1	0	1	2	0	0.833333	1	0.666667	-0.263034	1	1
5850	chr1:9136942-9137160	219	0	1	1	0	0	0	0.666667	0	1.33333	1.22239	0.125	0.514772
5854	chr1:9147357-9147577	221	1	0	0	0	1	0	0.166667	0.333333	0	-0.415037	1	1
5861	chr1:9167543-9167911	369	1	0	0	0	1	1	0.333333	0.666667	0	-0.736966	0.5	1
5865	chr1:9177226-9177745	520	0	0	0	0	1	0	0.166667	0.333333	0	-0.415037	1	1
5876	chr1:9191387-9192262	876	2	0	0	1	0	1	0.333333	0.666667	0	-0.736966	0.5	1
5884	chr1:9218691-9218970	280	2	0	0	0	0	2	0.666667	0.666667	0.666667	0	1	1
5913	chr1:9266945-9267160	216	1	0	0	5	1	5	1.83333	3.66667	0	-2.22239	0.00488414	0.0430441
5920	chr1:9275972-9276200	229	0	0	0	0	0	0	0.166667	0	0.333333	0.415037	1	1
5923	chr1:9278536-9278977	442	1	1	1	1	0	1	0.666667	0.666667	0.666667	0	1	1
5925	chr1:9283959-9284439	481	0	0	0	0	1	0	0.166667	0.333333	0	-0.415037	1	1
5948	chr1:9326973-9327946	974	1	0	0	2	1	0	0.5	1	0	-1	0.25	0.736556
5957	chr1:9351338-9351649	312	1	0	0	0	0	0	0.333333	0	0.666667	0.736966	0.666667	1
6012	chr1:9419598-9419685	88	0	0	0	0	1	0	0.166667	0.333333	0	-0.415037	1	1
6028	chr1:9437905-9438120	216	4	1	1	3	1	5	2.33333	3	1.66667	-0.584963	0.455094	1
6029	chr1:9439984-9440181	198	3	1	1	0	0	0	1.16667	0	2.33333	1.73697	0.099575	0.465292
6038	chr1:9456014-9456235	222	1	0	0	5	2	0	1.5	2.33333	0.666667	-1	0.411262	1
6044	chr1:9468766-9469089	324	1	1	0	0	0	0	0.5	0	1	1	0.25	0.736556
6045	chr1:9469090-9469619	530	0	0	0	1	0	0	0.166667	0.333333	0	-0.415037	1	1
6055	chr1:9480191-9480425	235	13	1	2	0	1	0	0.666667	0.333333	1	0.584963	0.625	1
6056	chr1:9480426-9480899	474	2	0	0	0	1	2	0.5	1	0	-1	0.25	0.736556
6066	chr1:9487787-9487927	141	3	3	3	31	21	16	12.6667	22.6667	2.66667	-2.69032	5.9781e-07	1.89539e-05
6069	chr1:9488207-9488871	665	1	0	0	0	0	2	0.333333	0.666667	0	-0.736966	0.666667	1
6071	chr1:9490917-9491195	279	0	0	0	0	1	0	0.166667	0.333333	0	-0.415037	1	1
6072	chr1:9503581-9503802	222	0	0	0	0	0	0	0.166667	0	0.333333	0.415037	1	1
6084	chr1:9525365-9525571	207	0	0	0	0	0	0	0.166667	0	0.333333	0.415037	1	1
6095	chr1:9548234-9548450	217	4	1	2	7	5	9	4.66667	7	2.33333	-1.26303	0.012541	0.0932734
6098	chr1:9552547-9552631	85	14	14	12	0	0	0	13	0	26	4.75489	0.00145683	0.0158226
6100	chr1:9552808-9553026	219	1	0	0	6	8	9	4.66667	7.66667	1.66667	-1.70044	0.00184566	0.0192689
6107	chr1:9559094-9559599	506	0	0	0	0	0	0	0.166667	0	0.333333	0.415037	1	1
6111	chr1:9562131-9562244	114	1	1	0	0	0	1	0.5	0.333333	0.666667	0.321928	1	1
6118	chr1:9566367-9566960	594	2	1	0	0	0	0	0.333333	0	0.666667	0.736966	0.5	1
6124	chr1:9573554-9574069	516	1	0	0	1	3	0	0.833333	1.33333	0.333333	-0.807355	0.491203	1
6128	chr1:9576926-9577246	321	0	1	0	0	1	1	1	0.666667	1.33333	0.485427	0.730304	1
6129	chr1:9581784-9582518	735	0	0	0	0	1	0	0.166667	0.333333	0	-0.415037	1	1
6134	chr1:9583726-9583987	262	0	1	1	1	0	0	1	0.333333	1.66667	1	0.21875	0.736556
6139	chr1:9593953-9594329	377	0	0	0	0	0	1	0.166667	0.333333	0	-0.415037	1	1
6140	chr1:9597421-9597635	215	0	0	0	2	0	0	0.333333	0.666667	0	-0.736966	0.666667	1
6149	chr1:9601306-9601688	383	0	0	0	7	11	8	4.66667	8.66667	0.666667	-2.53605	3.03239e-06	7.71062e-05
6151	chr1:9602964-9603339	376	1	2	0	0	1	3	1.5	1.33333	1.66667	0.192645	1	1
6153	chr1:9604420-9604693	274	0	0	0	0	0	0	0.333333	0	0.666667	0.736966	0.666667	1
6164	chr1:9628586-9628833	248	3	1	1	0	1	1	0.666667	0.666667	0.666667	0	1	1
6169	chr1:9632375-9632600	226	0	0	0	0	1	0	0.166667	0.333333	0	-0.415037	1	1
6180	chr1:9640582-9640838	257	0	0	0	0	0	1	0.333333	0.333333	0.333333	0	1	1
6197	chr1:9659774-9659968	195	0	0	0	0	0	1	0.166667	0.333333	0	-0.415037	1	1
6213	chr1:9680779-9681389	611	0	0	0	0	1	1	0.333333	0.666667	0	-0.736966	0.5	1
6215	chr1:9682967-9683189	223	2	0	0	1	0	0	0.5	0.333333	0.666667	0.321928	1	1
6216	chr1:9683268-9683542	275	6	2	2	0	2	0	1.5	0.666667	2.33333	1	0.179688	0.68611
6227	chr1:9697573-9698089	517	0	0	0	1	2	1	0.833333	1.33333	0.333333	-0.807355	0.375	0.986607
6230	chr1:9699881-9700241	361	1	0	1	0	0	0	0.333333	0	0.666667	0.736966	0.5	1
6234	chr1:9702264-9702485	222	2	1	0	1	0	1	2	0.666667	3.33333	1.37851	0.426599	1
6237	chr1:9709012-9709084	73	2	8	4	0	0	0	6	0	12	3.70044	0.00626182	0.0535245
6249	chr1:9721086-9721615	530	0	1	0	1	1	1	0.833333	1	0.666667	-0.263034	1	1
6251	chr1:9724200-9724450	251	2	1	0	0	2	2	0.833333	1.33333	0.333333	-0.807355	0.375	0.986607
6253	chr1:9726856-9727233	378	1	0	0	0	1	0	0.166667	0.333333	0	-0.415037	1	1
6255	chr1:9727528-9727771	244	2	0	0	2	1	0	0.5	1	0	-1	0.25	0.736556
6263	chr1:9736083-9736834	752	0	0	0	0	1	0	0.166667	0.333333	0	-0.415037	1	1
6267	chr1:9739976-9740109	134	0	1	0	0	1	0	0.333333	0.333333	0.333333	0	1	1
6272	chr1:9742908-9743420	513	0	0	0	0	1	0	0.166667	0.333333	0	-0.415037	1	1
6284	chr1:9753376-9753606	231	1	0	0	0	0	0	0.166667	0	0.333333	0.415037	1	1
6288	chr1:9770937-9771411	475	0	0	0	0	1	0	0.333333	0.333333	0.333333	0	1	1
6301	chr1:9801114-9801894	781	0	0	0	1	1	1	0.5	1	0	-1	0.25	0.736556
6306	chr1:9804905-9804965	61	0	0	1	0	0	0	0.5	0	1	1	0.25	0.736556
6307	chr1:9805182-9805211	30	0	1	0	0	0	0	0.166667	0	0.333333	0.415037	1	1
6311	chr1:9810814-9811047	234	1	1	0	0	0	0	0.333333	0	0.666667	0.736966	0.5	1
6314	chr1:9818145-9818802	658	1	0	0	1	3	2	1	2	0	-1.58496	0.03125	0.191732
6318	chr1:9820740-9821255	516	2	0	1	1	1	1	0.833333	1	0.666667	-0.263034	1	1
6324	chr1:9829802-9830012	211	5	3	2	0	0	0	1.33333	0	2.66667	1.87447	0.0078125	0.0624827
6335	chr1:9841595-9841813	219	1	0	0	0	0	0	0.166667	0	0.333333	0.415037	1	1
6350	chr1:9864128-9864345	218	1	1	0	0	0	0	0.5	0	1	1	0.25	0.736556
6358	chr1:9880288-9880501	214	1	1	0	0	0	0	0.166667	0	0.333333	0.415037	1	1
6375	chr1:9889954-9890361	408	2	1	0	3	6	5	2.66667	4.66667	0.666667	-1.76553	0.00418091	0.0375058
6376	chr1:9892973-9893060	88	0	0	0	0	0	0	0.166667	0	0.333333	0.415037	1	1
6380	chr1:9898107-9898316	210	1	0	0	0	0	1	0.166667	0.333333	0	-0.415037	1	1
6385	chr1:9911522-9911743	222	1	0	0	1	0	0	0.166667	0.333333	0	-0.415037	1	1
6393	chr1:9924480-9924986	507	0	0	0	0	1	1	0.5	0.666667	0.333333	-0.321928	1	1
6416	chr1:9955647-9955867	221	0	0	0	1	0	0	0.166667	0.333333	0	-0.415037	1	1
6417	chr1:9956770-9956949	180	0	1	1	15	1	1	3.33333	5.66667	1	-1.73697	0.3478	0.952633
6419	chr1:9959216-9959741	526	0	0	0	0	1	0	0.166667	0.333333	0	-0.415037	1	1
6422	chr1:9965574-9965876	303	1	1	1	0	0	1	0.833333	0.333333	1.33333	0.807355	0.375	0.986607
6424	chr1:9968525-9968832	308	1	0	0	1	2	1	0.833333	1.33333	0.333333	-0.807355	0.375	0.986607
6430	chr1:9971581-9971800	220	10	3	2	1	0	1	1.33333	0.666667	2	0.847997	0.289063	0.822298
6431	chr1:9971801-9972019	219	1	0	1	0	0	0	0.333333	0	0.666667	0.736966	0.5	1
6438	chr1:9984506-9984787	282	0	0	0	0	0	2	0.333333	0.666667	0	-0.736966	0.666667	1
6448	chr1:10010242-10010732	491	9	1	2	12	9	11	7.16667	10.6667	3.66667	-1.32193	0.00391883	0.0355966
6450	chr1:10013592-10013812	221	0	0	0	0	1	0	0.166667	0.333333	0	-0.415037	1	1
6455	chr1:10019165-10019354	190	0	0	0	4	11	10	4.16667	8.33333	0	-3.22239	1.1029e-05	0.000234993
6462	chr1:10023561-10023837	277	0	0	0	1	0	1	0.333333	0.666667	0	-0.736966	0.5	1
6469	chr1:10037058-10037282	225	0	0	0	0	0	1	0.166667	0.333333	0	-0.415037	1	1
6470	chr1:10037631-10038338	708	0	1	0	0	2	0	0.5	0.666667	0.333333	-0.321928	1	1
6472	chr1:10042865-10043337	473	0	0	0	0	1	0	0.166667	0.333333	0	-0.415037	1	1
6493	chr1:10061980-10062050	71	2	4	10	0	0	0	3.83333	0	7.66667	3.11548	4.27323e-06	0.000103845
6496	chr1:10066413-10066676	264	16	5	4	1	1	2	4.33333	1.33333	7.33333	1.8365	0.0345501	0.208982
6498	chr1:10067749-10068032	284	2	0	0	1	0	0	0.166667	0.333333	0	-0.415037	1	1
6507	chr1:10077346-10077654	309	0	0	0	0	0	0	0.166667	0	0.333333	0.415037	1	1
6508	chr1:10080535-10080785	251	3	1	1	2	1	1	2.16667	1.33333	3	0.777608	0.520113	1
6515	chr1:10083235-10083454	220	3	0	1	1	3	0	1	1.33333	0.666667	-0.485427	0.730304	1
6517	chr1:10084073-10084293	221	3	1	2	0	1	0	0.666667	0.333333	1	0.584963	0.625	1
6523	chr1:10091242-10091355	114	0	0	0	0	0	0	0.166667	0	0.333333	0.415037	1	1
6527	chr1:10092039-10092390	352	2	0	0	0	0	1	0.666667	0.333333	1	0.584963	0.775401	1
6533	chr1:10095150-10095371	222	10	1	0	0	0	0	0.666667	0	1.33333	1.22239	0.250526	0.736556
6536	chr1:10095895-10096167	273	0	0	0	0	2	0	0.333333	0.666667	0	-0.736966	0.666667	1
6538	chr1:10097179-10097396	218	0	1	0	0	0	0	0.166667	0	0.333333	0.415037	1	1
6539	chr1:10097926-10098262	337	1	0	0	1	0	1	0.5	0.666667	0.333333	-0.321928	1	1
6544	chr1:10099581-10099836	256	0	0	0	0	1	1	0.333333	0.666667	0	-0.736966	0.5	1
6551	chr1:10126615-10126888	274	5	2	1	0	1	0	1.33333	0.333333	2.33333	1.32193	0.0703125	0.354019
6554	chr1:10128501-10128857	357	2	1	0	0	3	2	1	1.66667	0.333333	-1	0.288983	0.822298
6566	chr1:10154585-10154795	211	0	0	0	0	0	0	0.166667	0	0.333333	0.415037	1	1
6580	chr1:10183925-10184218	294	0	0	0	0	1	0	0.166667	0.333333	0	-0.415037	1	1
6583	chr1:10194224-10194494	271	0	0	0	0	1	2	0.5	1	0	-1	0.25	0.736556
6587	chr1:10202403-10203384	982	0	0	0	0	0	0	0.166667	0	0.333333	0.415037	1	1
6589	chr1:10206791-10207475	685	0	0	0	0	2	0	0.333333	0.666667	0	-0.736966	0.666667	1
6593	chr1:10213409-10214225	817	0	0	0	0	1	1	0.333333	0.666667	0	-0.736966	0.5	1
6603	chr1:10223431-10223650	220	1	1	0	0	0	0	0.166667	0	0.333333	0.415037	1	1
6605	chr1:10226548-10226907	360	1	0	0	0	0	1	0.166667	0.333333	0	-0.415037	1	1
6612	chr1:10244165-10244552	388	0	0	0	2	4	1	1.33333	2.33333	0.333333	-1.32193	0.0703125	0.354019
6616	chr1:10251791-10252178	388	1	0	0	1	0	0	0.166667	0.333333	0	-0.415037	1	1
6619	chr1:10252980-10253334	355	1	0	0	1	0	2	0.666667	1	0.333333	-0.584963	0.625	1
6620	chr1:10253335-10253924	590	1	1	0	1	0	1	0.833333	0.666667	1	0.263034	1	1
6624	chr1:10259958-10260166	209	0	0	0	0	0	0	0.333333	0	0.666667	0.736966	0.666667	1
6626	chr1:10260367-10261137	771	0	0	0	1	0	0	0.333333	0.333333	0.333333	0	1	1
6628	chr1:10265208-10265448	241	2	1	0	2	1	2	1.33333	1.66667	1	-0.415037	0.726563	1
6631	chr1:10265817-10266529	713	0	0	0	0	0	0	0.166667	0	0.333333	0.415037	1	1
6633	chr1:10268508-10268882	375	1	0	0	0	1	0	0.166667	0.333333	0	-0.415037	1	1
6639	chr1:10274441-10274971	531	1	0	0	0	1	0	0.166667	0.333333	0	-0.415037	1	1
6641	chr1:10278572-10278795	224	2	3	1	0	0	0	1.16667	0	2.33333	1.73697	0.015625	0.10943
6649	chr1:10287187-10287597	411	0	0	0	1	0	0	0.166667	0.333333	0	-0.415037	1	1
6657	chr1:10315100-10315338	239	2	0	0	0	1	2	0.666667	1	0.333333	-0.584963	0.625	1
6658	chr1:10315339-10315572	234	0	0	0	1	0	0	0.333333	0.333333	0.333333	0	1	1
6663	chr1:10350633-10350779	147	0	0	0	0	1	0	0.166667	0.333333	0	-0.415037	1	1
6673	chr1:10379253-10379640	388	0	0	0	0	0	0	0.166667	0	0.333333	0.415037	1	1
6674	chr1:10389125-10389715	591	0	0	0	0	1	0	0.166667	0.333333	0	-0.415037	1	1
6678	chr1:10392963-10393185	223	2	0	0	0	0	0	0.166667	0	0.333333	0.415037	1	1
6679	chr1:10393186-10393352	167	0	0	0	1	0	0	0.166667	0.333333	0	-0.415037	1	1
6693	chr1:10420445-10420667	223	0	0	0	0	0	1	0.166667	0.333333	0	-0.415037	1	1
6715	chr1:10450658-10451114	457	0	0	0	1	1	0	0.333333	0.666667	0	-0.736966	0.5	1
6717	chr1:10453565-10453769	205	0	1	0	0	1	0	0.333333	0.333333	0.333333	0	1	1
6719	chr1:10456426-10456496	71	5	3	8	0	2	0	3.83333	0.666667	7	2.26303	0.00250879	0.0247145
6720	chr1:10457688-10458200	513	1	1	0	1	0	1	0.666667	0.666667	0.666667	0	1	1
6727	chr1:10461744-10461996	253	0	0	0	0	1	1	0.333333	0.666667	0	-0.736966	0.5	1
6732	chr1:10474525-10474808	284	1	0	0	0	0	0	0.166667	0	0.333333	0.415037	1	1
6734	chr1:10477860-10478097	238	1	1	0	0	0	1	0.333333	0.333333	0.333333	0	1	1
6741	chr1:10491594-10491835	242	3	0	0	0	0	0	0.5	0	1	1	0.55	1
6750	chr1:10503560-10504088	529	0	0	0	0	2	0	0.333333	0.666667	0	-0.736966	0.666667	1
6761	chr1:10515011-10515482	472	0	0	0	0	0	1	0.166667	0.333333	0	-0.415037	1	1
6764	chr1:10526722-10526934	213	0	1	0	0	0	0	0.333333	0	0.666667	0.736966	0.5	1
6769	chr1:10530575-10530795	221	0	0	0	0	0	0	0.166667	0	0.333333	0.415037	1	1
6786	chr1:10551831-10552148	318	2	0	0	0	1	0	0.166667	0.333333	0	-0.415037	1	1
6788	chr1:10559599-10560104	506	1	0	0	1	0	1	0.333333	0.666667	0	-0.736966	0.5	1
6790	chr1:10560725-10560959	235	3	2	0	0	0	1	1.83333	0.333333	3.33333	1.70044	0.24995	0.736556
6794	chr1:10572110-10572328	219	0	0	0	0	0	2	0.333333	0.666667	0	-0.736966	0.666667	1
6797	chr1:10586557-10587498	942	0	0	0	0	1	0	0.166667	0.333333	0	-0.415037	1	1
6809	chr1:10606326-10606850	525	0	0	0	1	1	0	0.333333	0.666667	0	-0.736966	0.5	1
6813	chr1:10611841-10612074	234	1	0	0	0	1	0	0.166667	0.333333	0	-0.415037	1	1
6816	chr1:10620208-10620429	222	0	0	0	1	0	0	0.166667	0.333333	0	-0.415037	1	1
6818	chr1:10623062-10623358	297	0	0	0	0	1	0	0.333333	0.333333	0.333333	0	1	1
6819	chr1:10623359-10623606	248	0	0	0	0	0	1	0.166667	0.333333	0	-0.415037	1	1
6825	chr1:10660177-10660402	226	1	0	0	1	0	0	0.333333	0.333333	0.333333	0	1	1
6829	chr1:10669600-10669866	267	0	0	0	1	0	0	0.166667	0.333333	0	-0.415037	1	1
6834	chr1:10681497-10681988	492	2	0	0	1	0	0	0.166667	0.333333	0	-0.415037	1	1
6848	chr1:10688086-10688302	217	0	0	0	0	1	1	0.333333	0.666667	0	-0.736966	0.5	1
6879	chr1:10705291-10705511	221	1	0	0	1	1	2	0.666667	1.33333	0	-1.22239	0.125	0.514772
6997	chr1:10817550-10817769	220	2	1	1	0	0	0	0.5	0	1	1	0.25	0.736556
7023	chr1:10843282-10843853	572	0	0	0	0	1	1	0.333333	0.666667	0	-0.736966	0.5	1
7052	chr1:10862003-10862213	211	1	1	0	0	0	1	0.333333	0.333333	0.333333	0	1	1
7058	chr1:10878181-10878772	592	1	1	0	0	1	0	0.333333	0.333333	0.333333	0	1	1
7068	chr1:10886267-10886490	224	2	1	0	0	1	0	0.333333	0.333333	0.333333	0	1	1
7070	chr1:10886696-10886782	87	2	1	1	0	0	0	0.333333	0	0.666667	0.736966	0.5	1
7085	chr1:10908777-10908991	215	6	2	1	1	1	1	1.66667	1	2.33333	0.736966	0.34375	0.94449
7107	chr1:10940902-10941588	687	1	0	0	0	0	1	0.166667	0.333333	0	-0.415037	1	1
7110	chr1:10943298-10943923	626	1	1	0	0	0	0	0.166667	0	0.333333	0.415037	1	1
7123	chr1:10951715-10951952	238	3	2	1	1	0	0	1	0.333333	1.66667	1	0.21875	0.736556
7148	chr1:10981402-10982385	984	0	0	0	0	0	1	0.166667	0.333333	0	-0.415037	1	1
7150	chr1:10989380-10989912	533	1	1	0	0	3	0	0.666667	1	0.333333	-0.584963	0.775401	1
7158	chr1:10992784-10993306	523	1	0	0	0	0	0	0.166667	0	0.333333	0.415037	1	1
7159	chr1:10996277-10996579	303	6	3	3	0	0	1	2.16667	0.333333	4	1.90689	0.00341797	0.0322607
7179	chr1:11024781-11025486	706	0	0	0	0	3	0	0.5	1	0	-1	0.55	1
7184	chr1:11034861-11035387	527	1	0	0	0	1	2	0.666667	1	0.333333	-0.584963	0.625	1
7200	chr1:11058769-11059182	414	1	0	0	3	0	0	0.5	1	0	-1	0.55	1
7216	chr1:11075565-11075651	87	14	7	8	0	0	0	6	0	12	3.70044	0.000368235	0.00491983
7221	chr1:11078033-11078559	527	0	1	0	0	0	0	0.166667	0	0.333333	0.415037	1	1
7223	chr1:11079717-11080296	580	1	0	0	0	0	0	0.166667	0	0.333333	0.415037	1	1
7227	chr1:11089143-11089370	228	0	0	0	0	0	0	0.333333	0	0.666667	0.736966	0.666667	1
7228	chr1:11091104-11091510	407	1	0	0	1	0	1	1	0.666667	1.33333	0.485427	0.823119	1
7233	chr1:11093027-11093914	888	1	0	0	1	0	0	0.333333	0.333333	0.333333	0	1	1
7235	chr1:11096259-11096485	227	2	1	1	1	0	0	0.666667	0.333333	1	0.584963	0.625	1
7263	chr1:11121178-11121440	263	28	8	5	0	3	2	5.66667	1.66667	9.66667	2	0.0145053	0.105407
7273	chr1:11141625-11142063	439	1	0	0	0	0	1	0.5	0.333333	0.666667	0.321928	1	1
7276	chr1:11152365-11153015	651	0	0	0	0	1	0	0.166667	0.333333	0	-0.415037	1	1
7278	chr1:11154751-11154970	220	0	0	0	0	0	1	0.166667	0.333333	0	-0.415037	1	1
7279	chr1:11155445-11155695	251	1	0	0	1	0	0	0.333333	0.333333	0.333333	0	1	1
7282	chr1:11156134-11156204	71	2	1	1	0	0	1	0.666667	0.333333	1	0.584963	0.625	1
7298	chr1:11177311-11177615	305	0	0	0	0	0	1	0.166667	0.333333	0	-0.415037	1	1
7310	chr1:11205527-11205878	352	0	1	0	0	0	1	0.333333	0.333333	0.333333	0	1	1
7319	chr1:11245338-11246064	727	0	0	0	0	0	1	0.166667	0.333333	0	-0.415037	1	1
7329	chr1:11277551-11277814	264	1	0	0	0	2	0	0.333333	0.666667	0	-0.736966	0.666667	1
7331	chr1:11281145-11281470	326	0	0	0	1	0	0	0.5	0.333333	0.666667	0.321928	1	1
7338	chr1:11301082-11301302	221	1	0	0	0	1	0	0.166667	0.333333	0	-0.415037	1	1
7340	chr1:11303874-11304273	400	0	0	0	0	0	1	0.166667	0.333333	0	-0.415037	1	1
7347	chr1:11320940-11321453	514	0	0	0	0	0	0	0.166667	0	0.333333	0.415037	1	1
7351	chr1:11323218-11323467	250	6	4	3	8	12	24	10.3333	14.6667	6	-1.16227	0.11705	0.514772
7354	chr1:11328103-11328657	555	1	0	0	0	1	0	0.166667	0.333333	0	-0.415037	1	1
7356	chr1:11330402-11331240	839	1	0	0	0	0	0	0.166667	0	0.333333	0.415037	1	1
7358	chr1:11332331-11332544	214	3	2	1	0	0	0	0.833333	0	1.66667	1.41504	0.0625	0.326659
7364	chr1:11339574-11339786	213	0	0	0	0	0	1	0.166667	0.333333	0	-0.415037	1	1
7367	chr1:11351283-11351588	306	2	1	0	1	3	2	1.83333	2	1.66667	-0.169925	1	1
7373	chr1:11363175-11363713	539	1	0	0	1	2	0	0.666667	1	0.333333	-0.584963	0.625	1
7375	chr1:11364499-11364894	396	2	0	1	1	2	1	1.33333	1.33333	1.33333	0	1	1
7401	chr1:11413689-11413910	222	9	5	3	24	26	16	15.6667	22	9.33333	-1.15433	0.0408372	0.23659
7404	chr1:11414284-11414873	590	0	0	0	6	4	3	2.5	4.33333	0.666667	-1.67807	0.00738525	0.0609593
7407	chr1:11418424-11418704	281	1	0	0	16	11	5	5.33333	10.6667	0	-3.54432	2.80486e-05	0.000534484
7417	chr1:11432498-11432589	92	10	11	6	0	0	1	3.66667	0.333333	7	2.58496	0.000641547	0.00788572
7421	chr1:11436364-11436631	268	6	2	2	0	0	1	1.83333	0.333333	3.33333	1.70044	0.0396952	0.230369
7422	chr1:11438911-11439119	209	6	2	2	5	0	1	2.5	2	3	0.415037	0.719789	1
7424	chr1:11441394-11441921	528	0	1	0	4	2	2	1.83333	2.66667	1	-0.874469	0.226563	0.736556
7427	chr1:11446548-11447071	524	3	1	0	12	11	7	5.66667	10	1.33333	-2.23704	6.16489e-06	0.000142251
7429	chr1:11453094-11453309	216	1	1	1	14	2	9	4.5	8.33333	0.666667	-2.48543	0.0153233	0.10943
7435	chr1:11459098-11459277	180	3	2	2	0	2	4	3.16667	2	4.33333	0.830075	0.448011	1
7438	chr1:11459694-11459784	91	0	0	0	2	0	0	0.333333	0.666667	0	-0.736966	0.666667	1
7439	chr1:11463126-11463320	195	1	1	1	1	0	0	1.33333	0.333333	2.33333	1.32193	0.214843	0.736556
7443	chr1:11470386-11470609	224	0	0	0	1	0	0	0.166667	0.333333	0	-0.415037	1	1
7445	chr1:11477777-11477997	221	15	5	2	12	16	16	10.5	14.6667	6.33333	-1.09516	0.0124016	0.0923546
7447	chr1:11481562-11482072	511	0	1	0	1	0	0	0.333333	0.333333	0.333333	0	1	1
7454	chr1:11491152-11491370	219	6	1	1	2	1	0	0.833333	1	0.666667	-0.263034	1	1
7467	chr1:11520137-11520353	217	11	4	2	8	6	10	7.16667	8	6.33333	-0.295456	0.711668	1
7485	chr1:11569874-11570080	207	0	1	1	6	17	14	7.83333	12.3333	3.33333	-1.62149	0.0238252	0.155443
7499	chr1:11592848-11592927	80	0	0	0	0	1	0	0.333333	0.333333	0.333333	0	1	1
7509	chr1:11609783-11609999	217	1	0	0	7	0	0	1.33333	2.33333	0.333333	-1.32193	0.506178	1
7514	chr1:11622421-11622636	216	26	8	6	5	1	3	8.83333	3	14.6667	1.96963	0.11789	0.514772
7518	chr1:11628666-11628888	223	9	3	2	18	9	13	8.16667	13.3333	3	-1.8413	9.08401e-05	0.00146896
7524	chr1:11636809-11636914	106	11	14	3	4	2	2	8.16667	2.66667	13.6667	2	0.0578909	0.318453
7534	chr1:11656198-11656426	229	3	3	0	0	0	0	1.83333	0	3.66667	2.22239	0.0913631	0.437254
7537	chr1:11665541-11665659	119	26	20	7	10	6	2	13.8333	6	21.6667	1.69515	0.0811774	0.394301
7547	chr1:11678099-11678654	556	0	1	0	0	0	0	0.166667	0	0.333333	0.415037	1	1
7554	chr1:11683618-11683862	245	0	1	1	0	0	0	1.33333	0	2.66667	1.87447	0.116508	0.514772
7556	chr1:11687075-11687161	87	2	0	1	0	0	0	0.333333	0	0.666667	0.736966	0.5	1
7559	chr1:11694879-11695501	623	0	0	0	5	3	1	1.66667	3	0.333333	-1.58496	0.0422102	0.242971
7565	chr1:11702768-11702990	223	0	4	0	8	0	5	3	4.33333	1.66667	-1	0.377088	0.991368
7567	chr1:11704776-11704868	93	17	9	6	0	0	0	6	0	12	3.70044	0.00044064	0.00576518
7590	chr1:11725711-11725973	263	0	0	0	3	2	2	1.16667	2.33333	0	-1.73697	0.015625	0.10943
7611	chr1:11743729-11743952	224	4	2	1	0	0	0	1.16667	0	2.33333	1.73697	0.015625	0.10943
7637	chr1:11770678-11770903	226	1	0	0	0	0	0	0.333333	0	0.666667	0.736966	0.666667	1
7639	chr1:11772343-11773179	837	0	0	0	0	6	0	1	2	0	-1.58496	0.404692	1
7643	chr1:11776891-11777264	374	1	1	0	0	0	0	0.166667	0	0.333333	0.415037	1	1
7664	chr1:11816371-11816584	214	1	1	0	0	0	2	1.83333	0.666667	3	1.26303	0.457611	1
7666	chr1:11818091-11818317	227	0	1	0	0	1	0	0.333333	0.333333	0.333333	0	1	1
7669	chr1:11819680-11820494	815	0	0	0	0	0	2	0.333333	0.666667	0	-0.736966	0.666667	1
7687	chr1:11843398-11844093	696	0	0	0	0	0	1	0.166667	0.333333	0	-0.415037	1	1
7691	chr1:11845883-11846815	933	0	1	0	0	0	0	0.333333	0	0.666667	0.736966	0.5	1
7697	chr1:11853299-11853820	522	0	0	0	0	1	0	0.166667	0.333333	0	-0.415037	1	1
7715	chr1:11871533-11872088	556	0	0	0	0	1	0	0.333333	0.333333	0.333333	0	1	1
7718	chr1:11880499-11881057	559	0	0	0	1	3	1	1	1.66667	0.333333	-1	0.21875	0.736556
7725	chr1:11906470-11906987	518	0	0	0	0	0	1	0.166667	0.333333	0	-0.415037	1	1
7726	chr1:11915303-11915517	215	6	4	3	3	0	0	2.83333	1	4.66667	1.5025	0.0276614	0.177206
7735	chr1:11925388-11925606	219	47	17	15	43	30	35	28.5	36	21	-0.750022	0.0188723	0.129397
7737	chr1:11926008-11926370	363	1	1	0	1	2	2	1.5	1.66667	1.33333	-0.192645	1	1
7757	chr1:11955832-11956038	207	0	1	0	0	0	0	0.166667	0	0.333333	0.415037	1	1
7759	chr1:11957778-11958010	233	0	0	0	1	0	0	0.166667	0.333333	0	-0.415037	1	1
7776	chr1:11984025-11984188	164	9	8	9	0	2	2	4.16667	1.33333	7	1.77761	0.000910521	0.0106793
7784	chr1:11993635-11993846	212	2	1	0	1	1	0	1.16667	0.666667	1.66667	0.678072	0.605225	1
7798	chr1:12003447-12003668	222	0	1	0	0	0	0	0.333333	0	0.666667	0.736966	0.5	1
7800	chr1:12009570-12009809	240	0	0	0	0	2	0	0.5	0.666667	0.333333	-0.321928	1	1
7813	chr1:12022658-12023022	365	0	0	0	0	1	0	0.166667	0.333333	0	-0.415037	1	1
7822	chr1:12036825-12037043	219	0	1	0	1	1	2	1	1.33333	0.666667	-0.485427	0.6875	1
7827	chr1:12041266-12041484	219	12	2	1	1	5	1	3	2.33333	3.66667	0.485427	0.704277	1
7829	chr1:12051214-12051905	692	2	0	0	0	1	0	0.333333	0.333333	0.333333	0	1	1
7840	chr1:12073956-12074169	214	1	2	1	0	0	0	0.666667	0	1.33333	1.22239	0.125	0.514772
7844	chr1:12077561-12077961	401	1	0	0	1	1	0	0.5	0.666667	0.333333	-0.321928	1	1
7848	chr1:12080834-12081156	323	3	1	0	0	0	1	0.5	0.333333	0.666667	0.321928	1	1
7851	chr1:12083759-12083975	217	1	0	0	0	1	0	0.166667	0.333333	0	-0.415037	1	1
7854	chr1:12085210-12085433	224	0	0	0	0	1	1	0.333333	0.666667	0	-0.736966	0.5	1
7855	chr1:12085598-12086336	739	0	0	0	1	0	0	0.333333	0.333333	0.333333	0	1	1
7870	chr1:12103893-12104177	285	1	1	0	2	4	2	1.83333	2.66667	1	-0.874469	0.226563	0.736556
7875	chr1:12108984-12109201	218	0	1	1	0	0	0	0.333333	0	0.666667	0.736966	0.5	1
7876	chr1:12109220-12109647	428	1	0	0	0	1	0	0.5	0.333333	0.666667	0.321928	1	1
7899	chr1:12145261-12145480	220	1	1	0	0	1	0	0.333333	0.333333	0.333333	0	1	1
7901	chr1:12152658-12153225	568	0	0	0	0	1	1	0.5	0.666667	0.333333	-0.321928	1	1
7903	chr1:12155438-12155666	229	1	1	0	0	0	0	0.833333	0	1.66667	1.41504	0.251121	0.736556
7904	chr1:12160637-12160938	302	1	0	0	0	2	1	0.5	1	0	-1	0.25	0.736556
7910	chr1:12176537-12176781	245	1	0	0	0	0	1	0.166667	0.333333	0	-0.415037	1	1
7913	chr1:12177233-12177868	636	0	0	0	0	2	1	0.5	1	0	-1	0.25	0.736556
7915	chr1:12179015-12179487	473	4	1	0	11	16	9	6.5	12	1	-2.70044	9.55515e-08	3.82597e-06
7919	chr1:12182979-12183275	297	6	1	1	0	0	0	1.5	0	3	2	0.128143	0.524419
7920	chr1:12184382-12184803	422	0	0	0	2	0	1	0.666667	1	0.333333	-0.584963	0.625	1
7927	chr1:12191944-12192155	212	2	0	0	2	3	2	1.33333	2.33333	0.333333	-1.32193	0.0703125	0.354019
7963	chr1:12256063-12256282	220	4	1	0	0	0	0	0.166667	0	0.333333	0.415037	1	1
7967	chr1:12258841-12259608	768	0	0	0	0	2	1	0.5	1	0	-1	0.25	0.736556
7975	chr1:12277957-12278151	195	0	0	0	5	14	1	3.5	6.66667	0.333333	-2.52356	0.0660807	0.341204
7976	chr1:12278152-12278237	86	1	1	0	23	4	1	5.16667	9.33333	1	-2.36923	0.202971	0.736556
7978	chr1:12279226-12279716	491	1	0	0	1	1	0	0.666667	0.666667	0.666667	0	1	1
7989	chr1:12293156-12293409	254	0	0	0	1	1	1	0.666667	1	0.333333	-0.584963	0.625	1
7990	chr1:12293811-12294029	219	1	1	0	1	1	0	0.666667	0.666667	0.666667	0	1	1
7994	chr1:12306845-12307398	554	1	0	0	0	0	2	0.333333	0.666667	0	-0.736966	0.666667	1
8000	chr1:12315096-12315313	218	0	0	0	0	0	0	0.166667	0	0.333333	0.415037	1	1
8002	chr1:12328112-12328326	215	1	0	0	0	1	0	0.166667	0.333333	0	-0.415037	1	1
8005	chr1:12350484-12350704	221	1	1	0	0	0	0	0.333333	0	0.666667	0.736966	0.5	1
8010	chr1:12366134-12366578	445	0	0	0	0	0	1	0.166667	0.333333	0	-0.415037	1	1
8012	chr1:12369361-12369930	570	0	0	0	0	1	0	0.166667	0.333333	0	-0.415037	1	1
8018	chr1:12407321-12407534	214	6	1	2	0	0	0	1.5	0	3	2	0.0474383	0.268596
8019	chr1:12413287-12413514	228	0	0	0	0	0	1	0.166667	0.333333	0	-0.415037	1	1
8026	chr1:12439916-12440181	266	3	1	1	0	0	1	0.666667	0.333333	1	0.584963	0.625	1
8038	chr1:12525795-12526114	320	0	0	0	0	0	2	0.5	0.666667	0.333333	-0.321928	1	1
8041	chr1:12527320-12527538	219	0	0	0	0	0	1	0.166667	0.333333	0	-0.415037	1	1
8052	chr1:12572551-12572695	145	0	0	0	0	1	0	0.166667	0.333333	0	-0.415037	1	1
8057	chr1:12575912-12576306	395	0	0	0	0	1	0	0.166667	0.333333	0	-0.415037	1	1
8061	chr1:12581892-12582123	232	4	1	1	2	1	1	1.16667	1.33333	1	-0.222392	1	1
8062	chr1:12582683-12582917	235	1	0	0	0	1	0	0.166667	0.333333	0	-0.415037	1	1
8067	chr1:12590068-12590390	323	0	0	0	0	0	0	0.166667	0	0.333333	0.415037	1	1
8069	chr1:12591044-12591303	260	1	0	1	1	2	1	0.833333	1.33333	0.333333	-0.807355	0.375	0.986607
8090	chr1:12636195-12636514	320	0	0	0	0	2	1	0.5	1	0	-1	0.25	0.736556
8094	chr1:12639597-12639812	216	0	0	0	0	0	0	0.166667	0	0.333333	0.415037	1	1
8110	chr1:12657183-12657482	300	3	0	0	1	3	1	1	1.66667	0.333333	-1	0.21875	0.736556
8113	chr1:12664891-12665006	116	0	1	0	2	0	0	0.833333	0.666667	1	0.263034	1	1
8130	chr1:12685035-12685253	219	1	0	0	0	0	1	0.166667	0.333333	0	-0.415037	1	1
8132	chr1:12688925-12689141	217	3	1	1	4	1	2	2.33333	2.33333	2.33333	0	1	1
8134	chr1:12694617-12695213	597	3	0	0	2	4	2	1.33333	2.66667	0	-1.87447	0.0078125	0.0624827
8146	chr1:12720748-12720955	208	2	1	1	1	0	1	1	0.666667	1.33333	0.485427	0.6875	1
8152	chr1:12750861-12751625	765	0	0	0	1	1	0	0.333333	0.666667	0	-0.736966	0.5	1
8154	chr1:12753914-12754228	315	0	0	0	0	1	2	0.5	1	0	-1	0.25	0.736556
8166	chr1:12800601-12801234	634	1	0	0	2	1	2	1	1.66667	0.333333	-1	0.21875	0.736556
8180	chr1:12887939-12888810	872	0	0	0	0	1	0	0.166667	0.333333	0	-0.415037	1	1
8181	chr1:12890542-12890772	231	1	1	0	3	8	3	3	4.66667	1.33333	-1.28011	0.103683	0.48251
8183	chr1:12897899-12898223	325	1	0	0	0	0	0	0.166667	0	0.333333	0.415037	1	1
8187	chr1:12910704-12910986	283	1	1	0	19	8	11	6.5	12.6667	0.333333	-3.35755	9.04237e-06	0.000199731
8190	chr1:12914285-12914432	148	0	0	0	3	0	0	0.5	1	0	-1	0.55	1
8192	chr1:12936548-12936935	388	1	0	0	6	5	7	3.5	6	1	-1.80735	0.00148964	0.0160956
8195	chr1:12945155-12945530	376	1	0	1	1	9	4	2.66667	4.66667	0.666667	-1.76553	0.0967525	0.456192
8224	chr1:13039445-13039596	152	0	0	0	0	1	0	0.166667	0.333333	0	-0.415037	1	1
8226	chr1:13049908-13050296	389	1	0	0	1	0	0	0.5	0.333333	0.666667	0.321928	1	1
8240	chr1:13131663-13131958	296	0	0	0	9	4	6	3.33333	6.33333	0.333333	-2.45943	4.00543e-05	0.000715445
8244	chr1:13138903-13138988	86	0	0	1	0	0	0	0.166667	0	0.333333	0.415037	1	1
8254	chr1:13187782-13188234	453	1	0	0	17	6	10	6.16667	11	1.33333	-2.36257	0.002701	0.0262795
8257	chr1:13189662-13189809	148	0	0	1	2	3	2	1.83333	2.33333	1.33333	-0.514573	0.548828	1
8263	chr1:13213866-13214256	391	0	0	0	1	0	1	0.333333	0.666667	0	-0.736966	0.5	1
8309	chr1:13481979-13482194	216	0	0	0	3	8	8	3.16667	6.33333	0	-2.87447	3.42256e-05	0.000633751
8312	chr1:13485781-13486092	312	0	0	0	0	1	2	0.5	1	0	-1	0.25	0.736556
8335	chr1:13523452-13523703	252	0	0	0	1	0	2	0.5	1	0	-1	0.25	0.736556
8352	chr1:13552689-13552911	223	0	0	0	0	1	0	0.166667	0.333333	0	-0.415037	1	1
8370	chr1:13702816-13703031	216	1	0	0	2	7	5	2.66667	4.66667	0.666667	-1.76553	0.0155701	0.10943
8373	chr1:13706613-13706924	312	3	1	1	2	5	6	2.5	4.33333	0.666667	-1.67807	0.00738525	0.0609593
8396	chr1:13743538-13743984	447	0	0	0	0	3	2	0.833333	1.66667	0	-1.41504	0.113277	0.51305
8417	chr1:13777237-13777579	343	3	0	0	0	0	0	0.166667	0	0.333333	0.415037	1	1
8420	chr1:13784362-13784868	507	2	0	0	4	8	2	2.33333	4.66667	0	-2.5025	0.00386473	0.0354946
8425	chr1:13799161-13799452	292	3	1	1	24	17	23	11.5	21.3333	1.66667	-3.06609	4.11924e-14	7.29127e-12
8427	chr1:13802890-13803697	808	0	0	0	1	0	0	0.166667	0.333333	0	-0.415037	1	1
8430	chr1:13811434-13811655	222	2	2	1	1	1	3	1.5	1.66667	1.33333	-0.192645	1	1
8433	chr1:13812486-13812811	326	3	1	1	10	31	11	10.5	17.3333	3.66667	-1.974	0.0492721	0.277465
8438	chr1:13825898-13826631	734	2	1	0	0	1	0	0.5	0.333333	0.666667	0.321928	1	1
8453	chr1:13851070-13851312	243	0	0	0	0	0	0	0.5	0	1	1	0.55	1
8464	chr1:13857153-13857576	424	0	0	1	0	1	1	0.666667	0.666667	0.666667	0	1	1
8472	chr1:13874324-13874542	219	3	1	0	6	0	1	2	2.33333	1.66667	-0.321928	0.886809	1
8475	chr1:13878441-13879385	945	0	0	0	3	3	1	1.16667	2.33333	0	-1.73697	0.015625	0.10943
8477	chr1:13880541-13880763	223	10	2	3	17	14	18	10.1667	16.3333	4	-1.79355	1.96988e-06	5.28328e-05
8487	chr1:13901190-13901417	228	0	0	0	6	0	4	1.66667	3.33333	0	-2.11548	0.0489496	0.276287
8494	chr1:13917530-13917769	240	3	1	0	3	1	0	0.833333	1.33333	0.333333	-0.807355	0.491203	1
8496	chr1:13919138-13919419	282	0	0	0	3	2	2	1.5	2.33333	0.666667	-1	0.179688	0.68611
8497	chr1:13934437-13934524	88	0	0	0	12	1	1	2.33333	4.66667	0	-2.5025	0.150214	0.59436
8500	chr1:13951860-13952079	220	1	0	0	1	2	0	0.5	1	0	-1	0.25	0.736556
8502	chr1:13952253-13952474	222	1	0	0	3	3	1	1.16667	2.33333	0	-1.73697	0.015625	0.10943
8510	chr1:13963223-13963603	381	1	0	0	4	3	2	1.83333	3	0.666667	-1.26303	0.0654297	0.338076
8514	chr1:13991804-13992013	210	25	10	11	17	23	32	18.5	24	13	-0.836501	0.0323339	0.196923
8518	chr1:13994608-13995473	866	0	0	0	2	1	2	1	1.66667	0.333333	-1	0.21875	0.736556
8519	chr1:13999551-13999941	391	0	0	0	0	0	0	0.166667	0	0.333333	0.415037	1	1
8526	chr1:14025232-14025795	564	1	0	0	1	0	1	0.333333	0.666667	0	-0.736966	0.5	1
8532	chr1:14037269-14037504	236	1	0	0	12	8	19	6.66667	13	0.333333	-3.39232	3.53461e-06	8.84598e-05
8535	chr1:14040457-14040678	222	0	0	0	0	1	0	0.166667	0.333333	0	-0.415037	1	1
8545	chr1:14082433-14082682	250	0	0	0	1	0	0	0.166667	0.333333	0	-0.415037	1	1
8548	chr1:14094666-14094890	225	0	0	0	0	2	0	0.333333	0.666667	0	-0.736966	0.666667	1
8551	chr1:14097828-14098149	322	0	0	0	0	0	1	0.333333	0.333333	0.333333	0	1	1
8563	chr1:14125645-14125864	220	0	0	0	1	0	0	0.5	0.333333	0.666667	0.321928	1	1
8572	chr1:14141695-14142018	324	0	0	0	0	1	0	0.5	0.333333	0.666667	0.321928	1	1
8580	chr1:14165272-14165496	225	2	1	0	4	1	2	1.5	2.33333	0.666667	-1	0.179688	0.68611
8587	chr1:14201926-14202307	382	1	0	0	5	7	1	2.16667	4.33333	0	-2.41504	0.00769492	0.0624827
8603	chr1:14237637-14238233	597	0	0	0	1	1	0	0.333333	0.666667	0	-0.736966	0.5	1
8605	chr1:14248214-14249157	944	0	0	0	2	0	0	0.5	0.666667	0.333333	-0.321928	1	1
8614	chr1:14259691-14259911	221	1	1	1	2	0	0	0.833333	0.666667	1	0.263034	1	1
8620	chr1:14284776-14284993	218	0	1	0	0	0	0	0.333333	0	0.666667	0.736966	0.5	1
8633	chr1:14327371-14327668	298	0	1	0	1	3	3	1.33333	2.33333	0.333333	-1.32193	0.0703125	0.354019
8635	chr1:14342069-14342543	475	0	0	0	0	1	2	0.5	1	0	-1	0.25	0.736556
8638	chr1:14378064-14378259	196	3	1	0	3	3	2	1.5	2.66667	0.333333	-1.45943	0.0390625	0.2272
8644	chr1:14402450-14402700	251	0	0	0	1	0	0	0.166667	0.333333	0	-0.415037	1	1
8647	chr1:14418679-14418896	218	0	0	0	1	0	1	0.333333	0.666667	0	-0.736966	0.5	1
8652	chr1:14453301-14453525	225	2	0	0	1	0	0	0.166667	0.333333	0	-0.415037	1	1
8655	chr1:14501692-14501911	220	0	0	0	1	0	1	0.333333	0.666667	0	-0.736966	0.5	1
8661	chr1:14537809-14538028	220	0	0	0	6	3	11	3.33333	6.66667	0	-2.9386	0.000838696	0.00995407
8663	chr1:14566049-14566372	324	0	1	0	0	3	2	1.16667	1.66667	0.666667	-0.678072	0.484103	1
8667	chr1:14584804-14585082	279	2	0	0	19	9	18	7.66667	15.3333	0	-4.02975	3.38317e-09	1.98273e-07
8670	chr1:14598971-14599277	307	3	0	0	12	15	12	6.5	13	0	-3.80735	3.63798e-12	4.17997e-10
8672	chr1:14606562-14606790	229	3	2	1	12	8	8	5.5	9.33333	1.66667	-1.9542	6.61877e-05	0.00110976
8679	chr1:14667476-14667660	185	0	1	0	3	2	3	1.5	2.66667	0.333333	-1.45943	0.0390625	0.2272
8680	chr1:14669337-14669560	224	1	0	0	1	1	2	0.666667	1.33333	0	-1.22239	0.125	0.514772
8684	chr1:14677759-14677978	220	4	1	0	13	7	5	5	8.33333	1.66667	-1.80735	0.0124266	0.0925211
8695	chr1:14702030-14702308	279	0	0	0	5	3	2	1.66667	3.33333	0	-2.11548	0.00195313	0.0199204
8699	chr1:14722380-14722588	209	0	1	0	11	20	12	7.33333	14.3333	0.333333	-3.52356	1.84768e-08	9.05582e-07
8701	chr1:14744188-14744416	229	6	1	1	12	8	6	5.33333	8.66667	2	-1.68806	0.00122414	0.0136013
8709	chr1:14759824-14760280	457	2	0	0	7	7	4	3.5	6	1	-1.80735	0.00148964	0.0160956
8711	chr1:14762447-14762649	203	0	1	0	3	3	0	1.66667	2	1.33333	-0.36257	0.806536	1
8714	chr1:14771615-14771835	221	1	0	0	0	0	1	0.166667	0.333333	0	-0.415037	1	1
8716	chr1:14779545-14779844	300	1	0	0	6	4	3	2.5	4.33333	0.666667	-1.67807	0.00738525	0.0609593
8717	chr1:14783247-14783500	254	1	1	1	4	1	2	1.66667	2.33333	1	-0.736966	0.34375	0.94449
8723	chr1:14834296-14834387	92	0	0	0	10	3	2	2.5	5	0	-2.58496	0.0221256	0.146018
8725	chr1:14840461-14840745	285	0	0	0	5	4	8	2.83333	5.66667	0	-2.73697	1.52588e-05	0.000311014
8727	chr1:14863018-14863302	285	0	0	0	10	4	3	2.83333	5.66667	0	-2.73697	0.00295768	0.0285252
8734	chr1:14874172-14874582	411	0	0	0	5	3	4	2	4	0	-2.32193	0.000488281	0.0062079
8736	chr1:14890459-14890592	134	0	0	0	2	3	5	1.66667	3.33333	0	-2.11548	0.00195313	0.0199204
8737	chr1:14899764-14899866	103	7	8	4	78	41	152	52.5	90.3333	14.6667	-2.54344	0.01036	0.0804441
8743	chr1:14921081-14921564	484	1	1	0	9	7	9	4.66667	8.33333	1	-2.22239	2.74405e-05	0.00052404
8753	chr1:14936797-14937035	239	1	1	1	0	3	0	1	1	1	0	1	1
8756	chr1:14941565-14942046	482	2	1	0	4	2	2	2.33333	2.66667	2	-0.289507	0.844209	1
8762	chr1:14955436-14955648	213	1	1	1	9	12	10	6.16667	10.3333	2	-1.91754	4.12576e-05	0.000734374
8763	chr1:14968631-14968820	190	1	1	0	7	5	3	2.83333	5	0.666667	-1.848	0.00234985	0.0233243
8794	chr1:15056673-15056956	284	0	0	0	1	0	1	0.333333	0.666667	0	-0.736966	0.5	1
8798	chr1:15061649-15062335	687	0	1	0	1	1	0	0.5	0.666667	0.333333	-0.321928	1	1
8805	chr1:15088366-15089145	780	0	0	0	0	3	1	0.833333	1.33333	0.333333	-0.807355	0.491203	1
8810	chr1:15095944-15096210	267	0	1	1	1	1	0	0.666667	0.666667	0.666667	0	1	1
8811	chr1:15097887-15098246	360	1	0	0	5	8	7	3.33333	6.66667	0	-2.9386	1.90735e-06	5.14454e-05
8814	chr1:15103590-15103817	228	2	0	0	1	0	0	0.333333	0.333333	0.333333	0	1	1
8826	chr1:15128273-15128824	552	0	0	0	2	2	0	0.666667	1.33333	0	-1.22239	0.125	0.514772
8831	chr1:15134886-15135256	371	0	0	0	0	0	1	0.166667	0.333333	0	-0.415037	1	1
8835	chr1:15140816-15141402	587	0	1	1	9	5	5	3.5	6.33333	0.666667	-2.1375	0.000221252	0.00317464
8838	chr1:15167481-15167826	346	6	1	0	12	14	15	7.83333	13.6667	2	-2.28951	1.7717e-07	6.61151e-06
8848	chr1:15190693-15190982	290	2	1	1	11	12	7	5.83333	10	1.66667	-2.04439	2.23615e-05	0.000436919
8854	chr1:15201502-15201751	250	3	1	1	22	20	18	12	20	4	-2.07039	2.94321e-07	1.01685e-05
8856	chr1:15210336-15210812	477	1	0	0	0	1	2	0.5	1	0	-1	0.25	0.736556
8863	chr1:15217433-15217980	548	0	0	0	1	2	1	0.666667	1.33333	0	-1.22239	0.125	0.514772
8867	chr1:15222644-15222864	221	6	3	2	0	0	0	1.66667	0	3.33333	2.11548	0.00195313	0.0199204
8871	chr1:15228815-15229039	225	1	1	0	6	2	5	2.5	4.33333	0.666667	-1.67807	0.00738525	0.0609593
8875	chr1:15242759-15242981	223	1	0	0	0	0	0	0.5	0	1	1	0.55	1
8876	chr1:15249034-15249212	179	0	0	0	0	2	0	0.5	0.666667	0.333333	-0.321928	1	1
8892	chr1:15264729-15264962	234	0	2	0	0	0	0	0.333333	0	0.666667	0.736966	0.666667	1
8898	chr1:15267505-15267941	437	0	1	1	0	0	1	0.833333	0.333333	1.33333	0.807355	0.375	0.986607
8899	chr1:15270099-15270494	396	2	1	1	0	1	1	0.666667	0.666667	0.666667	0	1	1
8904	chr1:15272927-15273063	137	1	1	0	0	0	1	0.666667	0.333333	1	0.584963	0.625	1
8907	chr1:15282474-15283026	553	0	0	0	0	1	1	0.333333	0.666667	0	-0.736966	0.5	1
8915	chr1:15298271-15298299	29	5	4	8	1	0	0	2.5	0.333333	4.66667	2.08746	0.014098	0.102675
8923	chr1:15309874-15310362	489	1	1	0	0	0	0	0.166667	0	0.333333	0.415037	1	1
8933	chr1:15319233-15319447	215	0	0	0	0	0	0	0.166667	0	0.333333	0.415037	1	1
8937	chr1:15323830-15324377	548	0	0	0	0	0	0	0.166667	0	0.333333	0.415037	1	1
8952	chr1:15358472-15359369	898	0	0	0	0	1	0	0.166667	0.333333	0	-0.415037	1	1
8962	chr1:15367877-15368455	579	3	2	1	6	3	2	5.16667	3.66667	6.66667	0.716207	0.630563	1
8963	chr1:15372501-15372718	218	6	1	1	0	3	0	1.33333	1	1.66667	0.415037	0.7871	1
8967	chr1:15381592-15381897	306	0	0	0	0	2	1	0.5	1	0	-1	0.25	0.736556
8969	chr1:15385222-15385442	221	6	4	1	0	1	0	1.66667	0.333333	3	1.58496	0.0214844	0.142243
8975	chr1:15395999-15396047	49	1	1	2	0	0	0	0.666667	0	1.33333	1.22239	0.125	0.514772
9004	chr1:15458725-15459212	488	1	1	0	0	2	1	0.666667	1	0.333333	-0.584963	0.625	1
9006	chr1:15465155-15465550	396	1	1	0	1	0	0	0.5	0.333333	0.666667	0.321928	1	1
9022	chr1:15517377-15517903	527	3	1	0	0	0	0	0.333333	0	0.666667	0.736966	0.5	1
9024	chr1:15519044-15519260	217	3	1	0	0	0	1	0.5	0.333333	0.666667	0.321928	1	1
9028	chr1:15525006-15525807	802	0	0	0	1	0	1	0.333333	0.666667	0	-0.736966	0.5	1
9039	chr1:15555192-15555415	224	0	1	0	0	0	0	0.5	0	1	1	0.25	0.736556
9041	chr1:15555742-15555979	238	9	3	1	0	0	0	2.33333	0	4.66667	2.5025	0.0506875	0.284709
9049	chr1:15567984-15568653	670	0	1	0	0	1	1	0.5	0.666667	0.333333	-0.321928	1	1
9058	chr1:15585175-15585262	88	0	1	0	0	0	0	0.333333	0	0.666667	0.736966	0.5	1
9059	chr1:15597239-15597559	321	1	1	1	0	0	0	0.5	0	1	1	0.25	0.736556
9064	chr1:15601552-15601799	248	0	1	0	0	0	0	0.166667	0	0.333333	0.415037	1	1
9065	chr1:15602965-15603222	258	1	0	0	1	0	0	0.333333	0.333333	0.333333	0	1	1
9073	chr1:15620983-15621121	139	0	1	0	0	0	0	0.166667	0	0.333333	0.415037	1	1
9075	chr1:15627419-15627637	219	0	0	1	0	0	0	0.166667	0	0.333333	0.415037	1	1
9086	chr1:15642075-15642381	307	2	1	0	0	0	1	1	0.333333	1.66667	1	0.43436	1
9087	chr1:15643380-15643611	232	3	1	0	0	0	1	0.833333	0.333333	1.33333	0.807355	0.491203	1
9098	chr1:15666415-15666621	207	1	2	1	0	0	0	0.833333	0	1.66667	1.41504	0.0625	0.326659
9106	chr1:15674039-15674288	250	4	1	1	0	0	0	0.666667	0	1.33333	1.22239	0.125	0.514772
9111	chr1:15681124-15681629	506	0	0	0	1	2	0	0.5	1	0	-1	0.25	0.736556
9119	chr1:15693518-15693916	399	3	1	0	0	1	1	0.666667	0.666667	0.666667	0	1	1
9122	chr1:15694561-15694664	104	0	0	1	11	3	3	3	5.66667	0.333333	-2.32193	0.0324354	0.197375
9123	chr1:15699708-15699932	225	0	1	0	0	1	0	0.333333	0.333333	0.333333	0	1	1
9125	chr1:15704446-15704705	260	4	1	1	0	0	1	0.666667	0.333333	1	0.584963	0.625	1
9138	chr1:15724623-15724697	75	0	0	0	1	0	0	0.166667	0.333333	0	-0.415037	1	1
9157	chr1:15751560-15751945	386	4	1	1	0	0	0	0.5	0	1	1	0.25	0.736556
9166	chr1:15761152-15761511	360	2	0	0	0	1	1	0.5	0.666667	0.333333	-0.321928	1	1
9186	chr1:15797169-15797388	220	0	0	0	0	0	2	0.333333	0.666667	0	-0.736966	0.666667	1
9192	chr1:15816462-15816677	216	0	1	0	0	0	1	0.5	0.333333	0.666667	0.321928	1	1
9204	chr1:15846950-15847576	627	0	0	0	0	0	1	0.333333	0.333333	0.333333	0	1	1
9238	chr1:15903338-15903558	221	1	1	1	0	0	0	0.333333	0	0.666667	0.736966	0.5	1
9248	chr1:15912248-15912468	221	0	0	0	4	2	11	2.83333	5.66667	0	-2.73697	0.0141484	0.102934
9251	chr1:15916037-15916304	268	0	0	0	0	1	0	0.166667	0.333333	0	-0.415037	1	1
9256	chr1:15927797-15928014	218	5	4	5	0	0	0	1.66667	0	3.33333	2.11548	0.0056329	0.0488581
9258	chr1:15929112-15929420	309	12	4	4	1	0	1	2.16667	0.666667	3.66667	1.48543	0.0224609	0.147405
9268	chr1:15946050-15946328	279	1	0	0	0	0	0	0.166667	0	0.333333	0.415037	1	1
9272	chr1:15956320-15956530	211	0	1	0	0	0	0	0.333333	0	0.666667	0.736966	0.5	1
9274	chr1:15957432-15957650	219	7	2	1	6	2	4	3.33333	4	2.66667	-0.447459	0.550301	1
9277	chr1:15963956-15964177	222	1	0	0	0	2	0	0.5	0.666667	0.333333	-0.321928	1	1
9278	chr1:15968937-15969486	550	1	0	0	0	0	0	0.166667	0	0.333333	0.415037	1	1
9281	chr1:15971478-15972212	735	0	0	0	0	0	1	0.166667	0.333333	0	-0.415037	1	1
9284	chr1:15974161-15974383	223	1	0	0	1	0	0	1	0.333333	1.66667	1	0.590705	1
9294	chr1:15996762-15997123	362	0	1	0	0	1	0	0.5	0.333333	0.666667	0.321928	1	1
9298	chr1:15999472-15999768	297	0	0	0	1	0	0	0.166667	0.333333	0	-0.415037	1	1
9299	chr1:16001629-16001852	224	2	1	1	1	1	0	1.16667	0.666667	1.66667	0.678072	0.453125	1
9312	chr1:16027988-16028210	223	0	0	0	0	0	1	0.166667	0.333333	0	-0.415037	1	1
9320	chr1:16040224-16040748	525	0	0	0	0	0	1	0.166667	0.333333	0	-0.415037	1	1
9324	chr1:16048732-16048952	221	0	0	1	0	0	0	0.166667	0	0.333333	0.415037	1	1
9368	chr1:16078995-16079176	182	0	0	0	0	0	0	0.166667	0	0.333333	0.415037	1	1
9393	chr1:16097835-16098208	374	1	0	0	1	2	0	0.5	1	0	-1	0.25	0.736556
9410	chr1:16111529-16112054	526	1	1	0	1	0	1	0.5	0.666667	0.333333	-0.321928	1	1
9417	chr1:16123659-16123882	224	3	1	1	9	13	16	7.16667	12.6667	1.66667	-2.35755	2.49951e-07	8.75974e-06
9437	chr1:16152775-16153531	757	1	0	0	0	1	1	0.333333	0.666667	0	-0.736966	0.5	1
9438	chr1:16153952-16154145	194	1	0	1	0	0	0	0.666667	0	1.33333	1.22239	0.250526	0.736556
9449	chr1:16163068-16163404	337	9	2	2	6	8	8	5.66667	7.33333	4	-0.736966	0.153303	0.603735
9457	chr1:16170046-16170256	211	0	0	1	0	0	0	0.166667	0	0.333333	0.415037	1	1
9459	chr1:16171146-16171368	223	3	1	1	0	0	1	1	0.333333	1.66667	1	0.21875	0.736556
9460	chr1:16172055-16172265	211	0	1	0	0	1	0	0.833333	0.333333	1.33333	0.807355	0.491203	1
9468	chr1:16183945-16184323	379	2	1	0	0	3	2	1.33333	1.66667	1	-0.415037	0.755812	1
9469	chr1:16185138-16185295	158	4	3	3	1	0	0	2	0.333333	3.66667	1.80735	0.00634766	0.0537019
9474	chr1:16187720-16187963	244	2	1	0	1	0	1	0.5	0.666667	0.333333	-0.321928	1	1
9478	chr1:16192942-16193164	223	0	0	0	0	1	1	0.333333	0.666667	0	-0.736966	0.5	1
9484	chr1:16206259-16206477	219	0	0	0	1	1	1	0.5	1	0	-1	0.25	0.736556
9488	chr1:16213869-16214101	233	1	1	1	0	0	1	0.5	0.333333	0.666667	0.321928	1	1
9490	chr1:16216302-16216592	291	0	1	0	0	0	0	0.666667	0	1.33333	1.22239	0.250526	0.736556
9494	chr1:16221511-16221723	213	1	1	0	0	0	0	0.166667	0	0.333333	0.415037	1	1
9498	chr1:16232161-16232372	212	0	1	1	0	0	0	0.666667	0	1.33333	1.22239	0.125	0.514772
9502	chr1:16244807-16245026	220	0	0	0	0	0	1	0.166667	0.333333	0	-0.415037	1	1
9510	chr1:16264692-16265013	322	3	1	1	1	0	1	1.33333	0.666667	2	0.847997	0.344547	0.94449
9521	chr1:16281264-16281573	310	0	0	0	0	0	1	0.166667	0.333333	0	-0.415037	1	1
9526	chr1:16296980-16297496	517	0	0	0	0	0	1	0.166667	0.333333	0	-0.415037	1	1
9538	chr1:16303612-16303894	283	0	0	0	0	0	1	0.166667	0.333333	0	-0.415037	1	1
9539	chr1:16307061-16307304	244	3	1	1	6	3	13	4.33333	7.33333	1.33333	-1.8365	0.0419271	0.242141
9550	chr1:16326144-16326361	218	1	1	0	0	0	1	1	0.333333	1.66667	1	0.43436	1
9622	chr1:16425249-16425471	223	3	2	1	0	0	0	1	0	2	1.58496	0.03125	0.191732
9629	chr1:16449677-16450090	414	0	0	0	0	0	0	0.166667	0	0.333333	0.415037	1	1
9643	chr1:16474460-16474686	227	4	1	1	2	4	1	2.5	2.33333	2.66667	0.137504	1	1
9661	chr1:16487368-16487943	576	0	0	0	0	0	0	0.333333	0	0.666667	0.736966	0.666667	1
9666	chr1:16489349-16490046	698	0	0	0	1	1	1	0.666667	1	0.333333	-0.584963	0.625	1
9673	chr1:16497410-16497486	77	0	1	0	1	0	0	1	0.333333	1.66667	1	0.43436	1
9680	chr1:16504790-16505051	262	6	2	2	0	1	1	1.66667	0.666667	2.66667	1.1375	0.109375	0.502503
9685	chr1:16509306-16509559	254	6	1	0	9	5	4	3.66667	6	1.33333	-1.58496	0.0109851	0.0838469
9691	chr1:16512164-16512660	497	0	0	0	0	1	0	0.166667	0.333333	0	-0.415037	1	1
9706	chr1:16542034-16542275	242	3	0	0	0	1	0	0.666667	0.333333	1	0.584963	0.775401	1
9719	chr1:16561316-16561532	217	1	1	0	0	0	0	0.333333	0	0.666667	0.736966	0.5	1
9734	chr1:16604554-16604775	222	2	1	0	0	1	0	0.5	0.333333	0.666667	0.321928	1	1
9739	chr1:16610086-16610301	216	1	0	0	1	0	0	0.333333	0.333333	0.333333	0	1	1
9744	chr1:16615160-16615377	218	0	0	0	2	1	1	1.16667	1.33333	1	-0.222392	1	1
9746	chr1:16622769-16623069	301	0	1	0	0	0	0	0.166667	0	0.333333	0.415037	1	1
9748	chr1:16623951-16624286	336	1	0	0	1	1	2	0.833333	1.33333	0.333333	-0.807355	0.375	0.986607
9750	chr1:16624421-16624645	225	1	0	0	0	0	0	0.333333	0	0.666667	0.736966	0.666667	1
9757	chr1:16636239-16636614	376	0	0	0	1	1	1	0.5	1	0	-1	0.25	0.736556
9767	chr1:16663163-16663404	242	1	0	0	4	3	1	1.66667	2.66667	0.666667	-1.1375	0.126757	0.520658
9771	chr1:16672859-16673107	249	0	1	0	0	0	0	0.5	0	1	1	0.25	0.736556
9773	chr1:16674795-16675120	326	4	1	0	0	0	2	0.666667	0.666667	0.666667	0	1	1
9789	chr1:16690731-16690961	231	3	2	0	1	0	0	1	0.333333	1.66667	1	0.288983	0.822298
9796	chr1:16698050-16698262	213	0	1	0	0	0	0	0.166667	0	0.333333	0.415037	1	1
9798	chr1:16701466-16701685	220	2	1	1	0	0	0	0.333333	0	0.666667	0.736966	0.5	1
9808	chr1:16715853-16716399	547	0	0	0	1	1	0	0.333333	0.666667	0	-0.736966	0.5	1
9812	chr1:16726615-16726863	249	1	1	0	2	0	1	0.833333	1	0.666667	-0.263034	1	1
9818	chr1:16732708-16732792	85	1	3	1	0	0	0	2	0	4	2.32193	0.0358167	0.214824
9822	chr1:16740654-16740889	236	0	0	0	1	0	1	0.833333	0.666667	1	0.263034	1	1
9824	chr1:16742148-16742740	593	0	0	0	0	1	0	0.166667	0.333333	0	-0.415037	1	1
9827	chr1:16746287-16746936	650	2	0	0	0	2	1	0.666667	1	0.333333	-0.584963	0.625	1
9831	chr1:16765698-16766003	306	0	0	0	0	0	1	0.166667	0.333333	0	-0.415037	1	1
9846	chr1:16836475-16836695	221	0	1	1	0	0	0	0.333333	0	0.666667	0.736966	0.5	1
9849	chr1:16839280-16839610	331	1	0	0	2	4	1	1.33333	2.33333	0.333333	-1.32193	0.0703125	0.354019
9850	chr1:16845073-16845295	223	3	1	0	1	0	0	0.666667	0.333333	1	0.584963	0.625	1
9871	chr1:16912625-16912803	179	2	3	1	0	1	0	1.33333	0.333333	2.33333	1.32193	0.0703125	0.354019
9885	chr1:16961094-16961181	88	0	0	0	1	0	0	0.166667	0.333333	0	-0.415037	1	1
9929	chr1:17034908-17035122	215	26	14	20	28	10	5	15.5	14.3333	16.6667	0.204358	0.78344	1
9937	chr1:17050923-17051016	94	0	1	0	0	0	0	0.166667	0	0.333333	0.415037	1	1
9981	chr1:17207350-17207576	227	0	1	0	1	1	0	0.666667	0.666667	0.666667	0	1	1
9989	chr1:17218041-17218261	221	0	1	1	0	0	0	0.666667	0	1.33333	1.22239	0.125	0.514772
9991	chr1:17226552-17226771	220	2	0	0	0	1	0	0.333333	0.333333	0.333333	0	1	1
9992	chr1:17226811-17227014	204	5	1	1	2	0	1	0.833333	1	0.666667	-0.263034	1	1
9995	chr1:17230607-17231084	478	4	1	2	3	3	6	3	4	2	-0.736966	0.237885	0.736556
9997	chr1:17237306-17237577	272	3	0	1	0	1	1	0.833333	0.666667	1	0.263034	1	1
10005	chr1:17255002-17255222	221	0	0	1	0	0	0	0.166667	0	0.333333	0.415037	1	1
10009	chr1:17267772-17268151	380	0	0	0	0	0	0	0.166667	0	0.333333	0.415037	1	1
10043	chr1:17317538-17318100	563	0	0	0	0	0	1	0.333333	0.333333	0.333333	0	1	1
10052	chr1:17321251-17321468	218	0	0	0	0	1	0	0.166667	0.333333	0	-0.415037	1	1
10062	chr1:17343165-17343810	646	0	1	0	0	0	2	0.5	0.666667	0.333333	-0.321928	1	1
10067	chr1:17352953-17353171	219	0	0	0	0	1	1	0.333333	0.666667	0	-0.736966	0.5	1
10073	chr1:17358787-17359232	446	1	0	0	0	0	3	0.5	1	0	-1	0.55	1
10074	chr1:17367876-17368081	206	0	0	0	0	1	0	0.166667	0.333333	0	-0.415037	1	1
10085	chr1:17381423-17381644	222	3	1	1	1	0	1	0.666667	0.666667	0.666667	0	1	1
10089	chr1:17384338-17384646	309	3	1	0	0	1	0	0.666667	0.333333	1	0.584963	0.625	1
10093	chr1:17402803-17403013	211	2	0	0	0	0	0	0.5	0	1	1	0.55	1
10110	chr1:17433031-17433482	452	4	1	1	1	2	0	1.66667	1	2.33333	0.736966	0.498131	1
10122	chr1:17453264-17453486	223	1	1	1	0	0	0	0.5	0	1	1	0.25	0.736556
10128	chr1:17472679-17472923	245	2	1	0	0	1	1	0.5	0.666667	0.333333	-0.321928	1	1
10137	chr1:17510915-17511237	323	0	1	0	0	0	0	0.5	0	1	1	0.25	0.736556
10184	chr1:17582809-17583451	643	0	1	0	0	1	1	0.5	0.666667	0.333333	-0.321928	1	1
10201	chr1:17627832-17627960	129	3	2	0	22	8	25	10.1667	18.3333	2	-2.68806	0.000554469	0.00689055
10206	chr1:17636880-17637044	165	45	37	25	37	31	25	31	31	31	0	1	1
10214	chr1:17645274-17645363	90	0	0	0	1	0	0	0.166667	0.333333	0	-0.415037	1	1
10234	chr1:17684129-17684350	222	3	0	0	0	2	1	0.666667	1	0.333333	-0.584963	0.625	1
10240	chr1:17700080-17700565	486	0	1	0	1	0	1	0.5	0.666667	0.333333	-0.321928	1	1
10241	chr1:17711058-17711158	101	12	9	3	1	3	2	6.16667	2	10.3333	1.91754	0.0669139	0.345251
10255	chr1:17748225-17748445	221	2	0	0	0	0	0	0.166667	0	0.333333	0.415037	1	1
10261	chr1:17756534-17757208	675	0	0	0	1	0	0	0.333333	0.333333	0.333333	0	1	1
10264	chr1:17759167-17759378	212	5	2	0	0	2	1	1.66667	1	2.33333	0.736966	0.531396	1
10270	chr1:17762154-17762338	185	1	1	1	0	0	0	0.5	0	1	1	0.25	0.736556
10286	chr1:17771681-17771898	218	1	1	0	0	1	0	0.5	0.333333	0.666667	0.321928	1	1
10293	chr1:17782256-17782886	631	0	0	0	0	0	1	0.333333	0.333333	0.333333	0	1	1
10299	chr1:17784848-17785096	249	1	0	0	0	0	0	0.333333	0	0.666667	0.736966	0.666667	1
10307	chr1:17795583-17795879	297	6	0	1	0	2	1	1.66667	1	2.33333	0.736966	0.62361	1
10312	chr1:17801373-17801597	225	3	1	0	0	0	1	0.5	0.333333	0.666667	0.321928	1	1
10316	chr1:17805739-17806056	318	1	1	1	0	1	1	0.666667	0.666667	0.666667	0	1	1
10325	chr1:17811550-17811915	366	3	0	0	0	1	0	0.666667	0.333333	1	0.584963	0.775401	1
10328	chr1:17818571-17818831	261	3	1	2	7	4	2	3.16667	4.33333	2	-0.830075	0.199224	0.736556
10336	chr1:17839073-17839449	377	0	0	1	0	0	0	0.166667	0	0.333333	0.415037	1	1
10353	chr1:17867966-17868386	421	3	0	0	0	1	0	0.666667	0.333333	1	0.584963	0.775401	1
10357	chr1:17878987-17879519	533	2	1	1	1	1	2	1.16667	1.33333	1	-0.222392	1	1
10385	chr1:17924690-17924847	158	0	0	1	0	0	0	0.166667	0	0.333333	0.415037	1	1
10386	chr1:17927172-17927469	298	6	2	1	3	0	1	2.16667	1.33333	3	0.777608	0.454951	1
10394	chr1:17932882-17933109	228	1	0	1	0	0	0	0.5	0	1	1	0.25	0.736556
10424	chr1:17989900-17989972	73	0	1	0	1	1	1	0.666667	1	0.333333	-0.584963	0.625	1
10439	chr1:18007372-18007657	286	2	0	0	0	1	0	0.5	0.333333	0.666667	0.321928	1	1
10468	chr1:18043399-18043636	238	3	1	1	4	2	2	4	2.66667	5.33333	0.788496	0.611103	1
10496	chr1:18127183-18127403	221	19	7	4	16	17	26	13.5	19.6667	7.33333	-1.31034	0.0011194	0.0125346
10510	chr1:18181469-18181692	224	3	1	0	17	6	2	5.33333	8.33333	2.33333	-1.48543	0.23163	0.736556
10512	chr1:18184074-18184423	350	4	1	0	7	20	7	7.33333	11.3333	3.33333	-1.50901	0.124797	0.514772
10523	chr1:18221039-18221368	330	4	1	1	15	13	16	8	14.6667	1.33333	-2.74723	1.51383e-09	9.6903e-08
10528	chr1:18238092-18238162	71	5	16	30	12	0	0	10.1667	4	16.3333	1.79355	0.149176	0.591168
10532	chr1:18249150-18249599	450	3	0	0	2	1	2	0.833333	1.66667	0	-1.41504	0.0625	0.326659
10540	chr1:18264171-18264573	403	2	0	0	3	2	1	1	2	0	-1.58496	0.03125	0.191732
10542	chr1:18265675-18265811	137	0	1	1	1	3	3	2	2.33333	1.66667	-0.321928	0.774414	1
10560	chr1:18338770-18339533	764	1	0	0	1	1	1	0.666667	1	0.333333	-0.584963	0.625	1
10570	chr1:18366473-18366689	217	2	0	0	0	1	0	0.833333	0.333333	1.33333	0.807355	0.660778	1
10572	chr1:18368979-18369279	301	1	1	0	0	1	2	0.833333	1	0.666667	-0.263034	1	1
10586	chr1:18389145-18389755	611	1	0	0	2	3	1	1	2	0	-1.58496	0.03125	0.191732
10589	chr1:18398154-18398379	226	1	2	1	4	3	4	2.5	3.66667	1.33333	-1	0.118469	0.514772
10606	chr1:18454081-18454327	247	4	1	2	5	5	4	4.16667	4.66667	3.66667	-0.280108	0.765067	1
10620	chr1:18499485-18499706	222	1	1	0	3	6	1	2.16667	3.33333	1	-1.11548	0.195709	0.736556
10627	chr1:18534969-18535209	241	1	0	0	1	0	0	0.166667	0.333333	0	-0.415037	1	1
10637	chr1:18541330-18541546	217	1	2	1	7	1	11	4.16667	6.33333	2	-1.28951	0.167619	0.652462
10650	chr1:18613064-18613599	536	0	0	0	3	2	2	1.16667	2.33333	0	-1.73697	0.015625	0.10943
10689	chr1:18764555-18764775	221	0	1	0	1	0	1	0.5	0.666667	0.333333	-0.321928	1	1
10702	chr1:18798467-18798813	347	3	0	1	0	0	2	1.16667	0.666667	1.66667	0.678072	0.643377	1
10703	chr1:18800484-18800745	262	1	2	1	11	19	16	9.16667	15.3333	3	-2.02975	6.115e-06	0.000141576
10713	chr1:18820584-18820795	212	3	2	2	37	24	11	14.6667	24	5.33333	-1.98089	0.0152786	0.10943
10718	chr1:18837127-18837351	225	0	0	0	5	2	2	2.16667	3	1.33333	-0.777608	0.427615	1
10745	chr1:18911486-18911874	389	1	1	0	0	0	0	0.5	0	1	1	0.25	0.736556
10751	chr1:18922130-18922221	92	6	4	1	9	7	4	6.66667	6.66667	6.66667	0	1	1
10753	chr1:18922620-18923414	795	3	0	0	1	3	0	0.666667	1.33333	0	-1.22239	0.250526	0.736556
10757	chr1:18927009-18927228	220	3	1	0	0	2	1	1.66667	1	2.33333	0.736966	0.62361	1
10811	chr1:19014929-19015332	404	3	1	0	1	0	2	0.833333	1	0.666667	-0.263034	1	1
10817	chr1:19026148-19026364	217	3	1	1	1	0	1	0.833333	0.666667	1	0.263034	1	1
10818	chr1:19028066-19028757	692	1	0	0	0	1	0	0.166667	0.333333	0	-0.415037	1	1
10839	chr1:19062658-19062883	226	4	1	2	4	5	2	3	3.66667	2.33333	-0.485427	0.480682	1
10848	chr1:19098250-19098472	223	2	1	1	3	1	3	2	2.33333	1.66667	-0.321928	0.774414	1
10854	chr1:19108585-19108725	141	1	1	1	0	1	0	0.666667	0.333333	1	0.584963	0.625	1
10858	chr1:19117069-19117365	297	3	1	1	9	5	5	4.33333	6.33333	2.33333	-1.1375	0.0485814	0.274505
10915	chr1:19218085-19218446	362	3	1	0	1	2	1	1	1.33333	0.666667	-0.485427	0.6875	1
10928	chr1:19242311-19242543	233	6	3	2	0	0	0	1.5	0	3	2	0.00390625	0.0354946
10964	chr1:19297907-19298146	240	4	2	2	0	0	0	0.833333	0	1.66667	1.41504	0.0625	0.326659
10965	chr1:19298193-19298525	333	0	0	0	16	10	12	6.33333	12.6667	0	-3.77259	7.27597e-12	7.87631e-10
10974	chr1:19327483-19327697	215	1	0	0	5	0	2	1.16667	2.33333	0	-1.73697	0.130755	0.532547
10978	chr1:19335276-19335521	246	4	3	0	1	0	1	1.5	0.666667	2.33333	1	0.284119	0.820754
10981	chr1:19342860-19343081	222	0	0	1	0	0	0	0.333333	0	0.666667	0.736966	0.5	1
10983	chr1:19348658-19349171	514	0	0	0	0	0	2	0.333333	0.666667	0	-0.736966	0.666667	1
11012	chr1:19417037-19417514	478	1	0	0	2	1	0	0.666667	1	0.333333	-0.584963	0.625	1
11018	chr1:19457940-19458291	352	0	0	0	0	1	2	0.5	1	0	-1	0.25	0.736556
11020	chr1:19495164-19495396	233	0	1	0	0	0	1	0.333333	0.333333	0.333333	0	1	1
11026	chr1:19541238-19541718	481	0	0	0	0	3	1	0.666667	1.33333	0	-1.22239	0.250526	0.736556
11042	chr1:19574193-19574442	250	1	0	1	0	0	0	0.166667	0	0.333333	0.415037	1	1
11046	chr1:19585552-19585683	132	0	0	0	0	0	0	0.166667	0	0.333333	0.415037	1	1
11048	chr1:19590571-19590839	269	2	1	0	5	4	2	2	3.66667	0.333333	-1.80735	0.00634766	0.0537019
11068	chr1:19618331-19618437	107	10	7	3	0	1	0	2	0.333333	3.66667	1.80735	0.071062	0.357055
11071	chr1:19623798-19624224	427	0	0	0	0	0	1	0.166667	0.333333	0	-0.415037	1	1
11084	chr1:19647300-19647550	251	1	0	0	0	0	1	0.166667	0.333333	0	-0.415037	1	1
11112	chr1:19688824-19689025	202	4	3	3	0	0	2	1.83333	0.666667	3	1.26303	0.0654297	0.338076
11113	chr1:19692162-19692252	91	4	3	3	0	0	0	1.66667	0	3.33333	2.11548	0.00195313	0.0199204
11115	chr1:19692774-19693106	333	2	0	0	0	0	0	0.5	0	1	1	0.55	1
11126	chr1:19719022-19719209	188	1	1	0	0	0	1	0.333333	0.333333	0.333333	0	1	1
11135	chr1:19748968-19749155	188	3	1	1	0	0	0	0.333333	0	0.666667	0.736966	0.5	1
11152	chr1:19786864-19787293	430	0	0	0	0	2	0	0.5	0.666667	0.333333	-0.321928	1	1
11167	chr1:19812779-19812988	210	11	6	8	35	26	27	18.3333	29.3333	7.33333	-1.86394	1.55028e-10	1.2554e-08
11169	chr1:19813297-19813991	695	4	1	0	9	10	12	5.33333	10.3333	0.333333	-3.08746	1.53668e-08	7.65325e-07
11172	chr1:19815974-19816198	225	1	0	0	0	0	1	0.166667	0.333333	0	-0.415037	1	1
11173	chr1:19817876-19818507	632	1	0	0	1	0	1	0.333333	0.666667	0	-0.736966	0.5	1
11178	chr1:19828681-19828897	217	1	0	0	1	0	0	1	0.333333	1.66667	1	0.590705	1
11180	chr1:19834507-19834735	229	0	0	0	3	0	1	0.833333	1.33333	0.333333	-0.807355	0.491203	1
11193	chr1:19879946-19880639	694	0	0	0	0	2	1	0.5	1	0	-1	0.25	0.736556
11198	chr1:19886588-19886862	275	0	0	0	1	0	1	0.333333	0.666667	0	-0.736966	0.5	1
11203	chr1:19888819-19889070	252	1	0	0	0	0	1	0.166667	0.333333	0	-0.415037	1	1
11210	chr1:19899722-19899941	220	1	2	0	0	1	0	0.666667	0.333333	1	0.584963	0.625	1
11213	chr1:19903217-19903449	233	5	1	1	3	0	1	2.33333	1.33333	3.33333	0.893085	0.516757	1
11224	chr1:19929343-19929748	406	0	0	0	0	0	1	0.166667	0.333333	0	-0.415037	1	1
11226	chr1:19930711-19930927	217	3	0	1	0	1	0	0.833333	0.333333	1.33333	0.807355	0.491203	1
11229	chr1:19937539-19937753	215	6	5	2	0	0	0	2	0	4	2.32193	0.000488281	0.0062079
11233	chr1:19950874-19951095	222	0	0	0	0	1	0	0.166667	0.333333	0	-0.415037	1	1
11240	chr1:19963085-19963318	234	0	1	1	1	2	2	1.16667	1.66667	0.666667	-0.678072	0.453125	1
11257	chr1:19975946-19976326	381	3	1	0	0	0	1	0.333333	0.333333	0.333333	0	1	1
11270	chr1:19987784-19988003	220	9	1	1	7	5	14	5.83333	8.66667	3	-1.27302	0.106217	0.492985
11278	chr1:19999912-20000115	204	2	0	1	0	4	1	1.33333	1.66667	1	-0.415037	0.809635	1
11307	chr1:20093950-20094509	560	0	0	0	0	2	0	0.333333	0.666667	0	-0.736966	0.666667	1
11313	chr1:20104860-20105070	211	0	1	0	0	0	0	0.166667	0	0.333333	0.415037	1	1
11314	chr1:20115274-20115492	219	0	0	0	1	1	0	0.333333	0.666667	0	-0.736966	0.5	1
11324	chr1:20136470-20136750	281	2	1	0	0	0	0	1	0	2	1.58496	0.249161	0.736556
11339	chr1:20170642-20170891	250	1	1	0	0	0	0	0.333333	0	0.666667	0.736966	0.5	1
11341	chr1:20175277-20175497	221	0	1	0	0	0	1	0.5	0.333333	0.666667	0.321928	1	1
11345	chr1:20180233-20180678	446	0	1	0	0	0	1	0.666667	0.333333	1	0.584963	0.625	1
11352	chr1:20182037-20182249	213	3	0	1	0	0	0	1.16667	0	2.33333	1.73697	0.24568	0.736556
11353	chr1:20189983-20190267	285	0	1	0	1	0	0	0.833333	0.333333	1.33333	0.807355	0.491203	1
11356	chr1:20190778-20191001	224	8	5	4	12	4	10	9	8.66667	9.33333	0.0962153	0.951719	1
11362	chr1:20206726-20207031	306	1	0	0	0	1	0	0.166667	0.333333	0	-0.415037	1	1
11364	chr1:20208051-20208271	221	0	0	0	0	0	0	0.333333	0	0.666667	0.736966	0.666667	1
11374	chr1:20228792-20229004	213	0	0	0	0	1	0	0.166667	0.333333	0	-0.415037	1	1
11397	chr1:20261317-20262000	684	0	1	0	3	3	2	1.66667	2.66667	0.666667	-1.1375	0.109375	0.502503
11399	chr1:20274753-20274985	233	2	1	0	0	0	1	0.333333	0.333333	0.333333	0	1	1
11400	chr1:20287539-20287760	222	0	0	0	2	3	4	1.5	3	0	-2	0.00390625	0.0354946
11405	chr1:20312554-20312852	299	0	0	0	0	3	0	0.666667	1	0.333333	-0.584963	0.775401	1
11406	chr1:20348443-20348623	181	0	0	0	0	0	0	0.333333	0	0.666667	0.736966	0.666667	1
11435	chr1:20462073-20462339	267	1	1	0	2	3	2	1.33333	2.33333	0.333333	-1.32193	0.0703125	0.354019
11447	chr1:20498348-20498899	552	0	0	0	0	0	1	0.333333	0.333333	0.333333	0	1	1
11465	chr1:20564842-20565126	285	1	0	0	0	2	1	0.5	1	0	-1	0.25	0.736556
11486	chr1:20643397-20643573	177	17	7	5	9	16	23	12.6667	16	9.33333	-0.718229	0.227769	0.736556
11495	chr1:20653052-20653254	203	9	4	4	3	2	2	4.83333	2.33333	7.33333	1.32193	0.153401	0.604097
11514	chr1:20694306-20694557	252	43	14	8	3	1	5	9.5	3	16	2.08746	0.0104392	0.081041
11519	chr1:20708121-20708411	291	3	1	2	0	0	0	1	0	2	1.58496	0.03125	0.191732
[truncated: 103,668 more rows]

## Sheet: HCT116_DKO
ampID	position	HCT116_r1	HCT116_r2	HCT116_r3	DKO_r1	DKO_r2	DKO_r3	baseMean	baseMeanA	baseMeanB	log2FoldChange2	pval_pooled	padj_pooled
[truncated: 131,353 more rows]
