# Supplementary material for: The epigenetic landscape of Alu repeats delineates the structural and functional genomic architecture of colon cancer cells
Source: HighWire-hosted journal article supplement (doi:10.1101/gr.207522.116), 2016-12-20
Supplement: Supplemental_Data_S3.xlsx [file Supplemental_Data_S3.xlsx]

## Sheet: Description
Supplemental Data S3. DNA METHYLATION OF Alus analyzed by WGBS.
WGBS data obtained from reference: Hansen et al, Nat Genet 43: 768-775, 2011
Mireia Jordà et al.
Field name	Cell content
Alu_id	Alu_ID
Canc1_CM	Coefficient of methylation (beta value) in Cancer 1
Canc1_CGinf	Informative CpGs used to calculate the Coefficient of Methylation in Cancer 1
Canc2_CM	Coefficient of methylation (beta value) in Cancer 2
Canc2_CGinf	Informative CpGs used to calculate the Coefficient of Methylation in Cancer 2
Canc3_CM	Coefficient of methylation (beta value) in Cancer 3
Canc3_CGinf	Informative CpGs used to calculate the Coefficient of Methylation in Cancer 3
Norm1_CM	Coefficient of methylation (beta value) innormal colon 1
Norm1_CGinf	Informative CpGs used to calculate the Coefficient of Methylation in normal colon 1
Norm2_CM	Coefficient of methylation (beta value) innormal colon 2
Norm2_CGinf	Informative CpGs used to calculate the Coefficient of Methylation in normal colon 2
Norm3_CM	Coefficient of methylation (beta value) innormal colon 3
Norm3_CGinf	Informative CpGs used to calculate the Coefficient of Methylation in normal colon 3
totalCpG	no of CpGs in the Alu
meanNorm	Mean Coeffciient of methylation of all normal samples
meanCan	Mean Coeffciient of methylation of all tumor samples
difNormCan	Difference meanNorm-meanCan
P.Value	Limma p value
adj.P.Val	adjusted Limma p value
chrom	Location of the Alu in hg19 (chromosome)
chromStart	Location of the Alu in hg19 (start position)
chromEnd	Location of the Alu in hg19 (end position)
Alu_family	Alu_family
strand	Alu orientation
Alu_mainfamily	Alu family
Alu_subFamily	Alu subfamily
polyA_length	Alu polyA length
polyA_perA	Percentage of As in the polyA tail
up500_cpgNum	Number of CpGs in the 500 bp upstream of the Alu
up500_OEratio	CpG observed/expected ratio in the 500 bp upstream of the Alu
up500_perGc	Percentage of G+C in the 500 bp upstream of the Alu
down500_cpgNum	Number of CpGs in the 500 bp downstream of the Alu
down500_OEratio	CpG observed/expected ratio in the 500 bp downstream of the Alu
down500_perGc	Percentage of G+C in the 500 bp downstream of the Alu
swScore	Smith
milliDiv
milliDel
milliIns
length
cpgNum
gcNum
perCpg
perGc
OEratio
ampID	NSUMA canonical amplicon ID
369_blood	no of NSUMA normalized reads in sample
544_blood	no of NSUMA normalized reads in sample
557_blood	no of NSUMA normalized reads in sample
369_normalcolon	no of NSUMA normalized reads in sample
544_normalcolon	no of NSUMA normalized reads in sample
557_normalcolon	no of NSUMA normalized reads in sample
369_Tumor	no of NSUMA normalized reads in sample
544_Tumor	no of NSUMA normalized reads in sample
557_Tumor	no of NSUMA normalized reads in sample
HCT116_r1	no of NSUMA normalized reads in sample
HCT116_r2	no of NSUMA normalized reads in sample
HCT116_r3	no of NSUMA normalized reads in sample
DKO_r1	no of NSUMA normalized reads in sample
DKO_r2	no of NSUMA normalized reads in sample
DKO_r3	no of NSUMA normalized reads in sample
amp_chr
amp_start
amp_end
amp_size
amp_type
smaI_ID
smaI_position
baseMean	Mean normalized reads in compared samples
baseMeanA	Mean normalized reads in compared samples set A
baseMeanB	Mean normalized reads in compared samples set B
log2FoldChange2	Log2 ((baseMeanA+1)/(baseMeanB+1))
pval_pooled	Limma p value
padj_pooled	Adjusted p value

## Sheet: ALU WGBS
Alu_id	Canc1_CM	Canc1_CGinf	Canc2_CM	Canc2_CGinf	Canc3_CM	Canc3_CGinf	Norm1_CM	Norm1_CGinf	Norm2_CM	Norm2_CGinf	Norm3_CM	Norm3_CGinf	totalCpG	meanNorm	meanCan	difNormCan	P.Value	adj.P.Val	chrom	chromStart	chromEnd	Alu_type	strand	ALu_Large_family	Alu_subFamily	polyA_length	polyA_perA	up500_cpgNum	up500_OEratio	up500_perGc	down500_cpgNum	down500_OEratio	down500_perGc	swScore	milliDiv	milliDel	milliIns	length	cpgNum	gcNum	perCpg	perGc	OEratio
324	0.71	3	0.89	3	1	3	0.75	3	0.92	3	0.96	3	5	0.876667	0.866667	-0.01	0.80731	0.961777	1	705685	705948	AluSg	-	S	g	0	0	7	0.18	0.55	6	0.15	0.56	1440	167	121	0	264	5	138	3.79	52.27	0.28
343	0.91	7	0.83	6	0.86	7	0.75	8	0.78	9	0.67	3	10	0.733333	0.866667	0.133333	0.0794408	0.500778	1	715231	715436	AluJb	+	J	b	0	0	20	0.64	0.5	8	0.28	0.48	1200	151	5	34	206	10	112	9.71	54.37	0.67
380	0.5	4	0.83	6	1	3	0.8	5	0.76	5	0.5	4	13	0.686667	0.776667	0.09	0.375684	0.734988	1	830670	830888	AluYk4	-	Y	k4	0	0	13	0.44	0.49	6	0.32	0.39	1848	59	5	0	219	13	127	11.87	57.99	0.73
381	0.5	3	1	4	0.74	3	1	4	1	3	1	6	19	1	0.746667	-0.253333	0.0756476	0.500778	1	834402	834706	AluY	-	Y	None	0	0	17	0.5	0.52	16	0.42	0.56	2633	39	0	7	305	19	170	12.46	55.74	0.81
394	1	6	0.83	6	0.92	6	0.83	6	0.93	5	0.88	4	6	0.88	0.916667	0.0366667	0.388478	0.740543	1	889928	890225	AluJo	+	J	o	22	0.82	16	0.36	0.61	15	0.35	0.61	1639	178	44	17	298	6	147	4.03	49.33	0.33
397	1	4	0.93	9	0.94	9	0.67	6	0.9	10	0.8	5	17	0.79	0.956667	0.166667	0.0489648	0.465646	1	907864	908157	AluSz	+	S	z	12	0.83	23	0.4	0.68	22	0.39	0.67	2143	119	7	7	294	17	161	11.56	54.76	0.78
398	1	3	0.25	5	0.25	3	1	3	0.88	4	0.83	3	8	0.903333	0.5	-0.403333	0.341707	0.723747	1	918836	919099	AluSq2	-	S	q2	0	0	34	0.71	0.62	16	0.35	0.61	1755	117	8	11	264	8	141	6.06	53.41	0.43
400	0.88	7	0.48	4	0.37	7	0.82	7	0.65	8	0.7	11	13	0.723333	0.576667	-0.146667	0.522351	0.826875	1	920274	920552	AluSz	-	S	z	0	0	20	0.73	0.47	11	0.42	0.46	2070	90	11	14	279	13	162	9.32	58.06	0.55
408	0.88	4	0.97	5	0.75	4	0.93	3	0.95	5	0.93	5	10	0.936667	0.866667	-0.07	0.485409	0.801526	1	925679	925916	AluSq2	-	S	q2	0	0	12	0.4	0.5	13	0.42	0.5	1901	84	4	0	238	10	126	8.4	52.94	0.61
409	0.94	3	0.75	4	0.8	5	0.7	4	0.9	3	1	5	9	0.866667	0.83	-0.0366667	0.492794	0.806581	1	926099	926374	AluSx1	+	S	x1	10	0.9	18	0.53	0.52	3	0.12	0.45	1993	109	58	0	276	9	153	6.52	55.43	0.42
418	1	4	0.72	8	0.67	6	1	7	0.94	6	0.92	6	12	0.953333	0.796667	-0.156667	0.391599	0.743122	1	930448	930744	AluSx1	+	S	x1	18	0.83	9	0.25	0.54	12	0.31	0.56	2265	94	14	7	297	12	160	8.08	53.87	0.56
426	0.67	6	0.64	6	0.56	3	0.75	4	0.9	5	0.44	8	12	0.696667	0.623333	-0.0733333	0.497702	0.810211	1	944205	944490	AluJb	-	J	b	0	0	14	0.49	0.48	18	0.56	0.51	1904	136	25	0	286	12	155	8.39	54.2	0.58
431	0.8	5	1	5	0.91	4	0.97	7	1	4	0.62	6	10	0.863333	0.903333	0.04	0.950884	1	1	946439	946713	AluSz	-	S	z	0	0	12	0.4	0.49	14	0.52	0.47	1205	211	113	29	275	10	147	7.27	53.45	0.51
433	0.55	11	0.7	5	0.34	5	0.59	11	0.25	7	0.14	6	12	0.326667	0.53	0.203333	0.242402	0.685356	1	948127	948437	AluJb	+	J	b	27	0.81	6	0.33	0.38	23	0.67	0.53	2053	132	0	13	311	12	173	7.72	55.63	0.5
438	0.98	7	1	7	0.83	6	1	5	0.79	4	1	5	9	0.93	0.936667	0.00666667	0.911194	0.995042	1	952058	952351	AluSg	-	S	g	0	0	14	0.41	0.53	27	0.74	0.54	1986	122	48	7	294	9	157	6.12	53.4	0.43
448	0.14	9	0.16	6	0.19	8	0.38	6	0.56	9	0.88	4	14	0.606667	0.163333	-0.443333	0.0245718	0.382898	1	993189	993488	AluSx1	+	S	x1	21	0.81	13	0.43	0.5	15	0.32	0.63	2240	107	10	0	300	14	162	9.33	54	0.64
449	0.25	4	0.09	6	0.17	5	0.15	5	0.21	5	0	5	10	0.12	0.17	0.05	0.409552	0.751852	1	995467	995755	AluSg	-	S	g	0	0	50	0.74	0.74	26	0.54	0.64	2006	125	59	0	289	10	148	6.92	51.21	0.53
452	0.86	6	0.98	7	0.77	9	1	7	0.77	8	0.94	6	9	0.903333	0.87	-0.0333333	0.650818	0.895779	1	1006651	1006943	AluSx1	-	S	x1	0	0	5	0.11	0.59	31	0.51	0.7	2047	130	20	0	293	9	161	6.14	54.95	0.41
453	0.73	5	0.76	5	1	5	1	5	0.73	5	0.83	5	5	0.853333	0.83	-0.0233333	0.923183	0.998471	1	1028187	1028428	AluJr	+	J	r	11	1	16	0.3	0.65	11	0.35	0.52	1229	194	78	0	242	5	133	4.13	54.96	0.29
454	1	5	1	7	0.89	7	0.96	7	1	7	0.92	8	8	0.96	0.963333	0.00333333	0.725075	0.930508	1	1029472	1029719	AluJb	-	J	b	0	0	11	0.35	0.5	11	0.46	0.44	993	157	242	65	248	8	141	6.45	56.85	0.4
460	1	3	0.88	4	0.56	3	0.5	4	0.83	3	1	5	7	0.776667	0.813333	0.0366667	0.898756	0.992084	1	1033457	1033748	AluSx3	-	S	x3	0	0	2	0.12	0.37	13	0.55	0.43	2026	127	10	7	292	7	153	4.79	52.4	0.35
467	1	4	0.96	5	0.93	5	0.96	5	1	5	0.93	5	5	0.963333	0.963333	0	1	1	1	1039103	1039355	AluJr	-	J	r	0	0	11	0.4	0.47	12	0.35	0.53	1145	213	198	0	253	5	132	3.95	52.17	0.3
469	1	7	1	7	0.93	7	0.91	7	0.94	6	0.92	7	7	0.923333	0.973333	0.05	0.0842464	0.500778	1	1040030	1040209	AluJo	+	J	o	16	0.88	9	0.28	0.51	7	0.25	0.47	844	150	11	117	180	7	100	7.78	55.56	0.51
471	1	4	0.75	4	0.95	7	1	4	0.96	4	0.71	7	8	0.89	0.9	0.01	0.994109	1	1	1040618	1040909	AluJr	+	J	r	24	0.83	10	0.37	0.47	14	0.58	0.44	1813	161	51	3	292	8	158	5.48	54.11	0.38
477	0.67	6	0.75	4	1	5	1	5	1	4	1	4	15	1	0.806667	-0.193333	0.073437	0.500778	1	1049294	1049601	AluSg	-	S	g	0	0	21	0.55	0.55	13	0.37	0.53	2342	81	0	23	308	15	172	9.74	55.84	0.65
479	0.56	3	0.71	4	0.9	5	0.73	6	0.47	3	0.88	6	7	0.693333	0.723333	0.03	0.851695	0.977638	1	1053111	1053411	AluJo	-	J	o	0	0	25	0.57	0.59	19	0.38	0.63	1824	149	23	13	301	7	166	4.65	55.15	0.31
480	0.86	8	1	8	0.9	7	0.79	8	0.93	8	0.9	6	8	0.873333	0.92	0.0466667	0.383407	0.736348	1	1054355	1054507	FRAM	-	FRAM	None	0	0	16	0.46	0.53	10	0.42	0.45	900	176	7	7	153	8	100	10.46	65.36	0.49
481	0.84	9	0.82	8	0.79	7	0.95	7	0.93	7	1	9	12	0.96	0.816667	-0.143333	0.0284485	0.398417	1	1055131	1055438	AluSz	+	S	z	34	0.85	13	0.43	0.49	18	0.39	0.61	2116	97	39	26	308	12	157	7.79	50.97	0.6
482	0.62	5	0.87	5	0.64	5	0.45	5	0.63	5	0.62	4	5	0.566667	0.71	0.143333	0.249898	0.694406	1	1055578	1055676	AluJo	-	J	o	0	0	21	0.58	0.54	12	0.29	0.57	397	192	61	30	99	5	60	10.1	60.61	0.56
487	0.7	11	0.88	8	0.84	9	0.77	5	0.82	13	0.72	12	18	0.77	0.806667	0.0366667	0.578041	0.858622	1	1066808	1067095	AluY	-	Y	None	0	0	21	0.65	0.51	22	0.55	0.57	2419	59	3	0	288	18	171	12.5	59.38	0.72
502	0.9	4	0.83	4	0.89	6	1	3	0.78	6	0.93	4	11	0.903333	0.873333	-0.03	0.38586	0.738361	1	1112696	1112989	AluY	-	Y	None	0	0	11	0.37	0.5	12	0.25	0.62	2363	88	0	0	294	11	162	7.48	55.1	0.51
521	0.75	8	0.93	8	0.81	7	0.92	6	1	7	0.75	4	10	0.89	0.83	-0.06	0.364905	0.72739	1	1144935	1145169	AluJo	-	J	o	0	0	21	0.44	0.63	20	0.49	0.57	1488	170	4	4	235	10	134	8.51	57.02	0.55
522	0.63	5	1	4	0.47	3	0.88	5	0.8	3	0.72	5	8	0.8	0.7	-0.1	0.870542	0.984171	1	1145205	1145508	AluSx1	+	S	x1	27	0.89	20	0.49	0.57	32	0.62	0.64	2159	122	16	0	304	8	164	5.26	53.95	0.37
524	1	3	0.93	3	0.89	3	0.94	3	0.93	3	0.93	3	3	0.933333	0.94	0.00666667	0.567937	0.854205	1	1156353	1156462	AluJo	+	J	o	0	0	20	0.49	0.58	13	0.37	0.53	633	200	0	0	110	3	71	5.45	64.55	0.26
525	0.91	9	0.91	9	0.97	10	0.92	10	0.94	10	0.95	10	10	0.936667	0.93	-0.00666667	0.981851	1	1	1156656	1157037	AluJb	+	J	b	20	0.75	19	0.49	0.56	20	0.55	0.54	877	149	21	238	382	10	205	5.24	53.66	0.36
526	1	9	1	9	0.91	8	1	8	0.97	10	0.95	9	11	0.973333	0.963333	-0.01	0.854132	0.978102	1	1157059	1157345	AluJb	+	J	b	18	0.72	12	0.34	0.54	26	0.48	0.66	1551	212	45	0	287	11	155	7.67	54.01	0.53
528	0.98	10	0.8	10	1	10	0.93	10	0.85	8	1	10	10	0.926667	0.926667	0	0.793049	0.957406	1	1160010	1160311	AluJb	+	J	b	23	0.7	15	0.43	0.53	18	0.39	0.61	1760	192	7	10	302	10	164	6.62	54.3	0.45
529	1	14	0.7	9	0.8	14	0.79	11	0.87	9	0.84	13	14	0.833333	0.83	-0.00333333	0.5683	0.854467	1	1164571	1164891	AluJr	-	J	r	0	0	20	0.43	0.61	17	0.44	0.57	1772	143	9	75	321	14	176	8.72	54.83	0.59
537	1	3	1	3	0.96	7	1	3	0.67	6	1	5	10	0.89	0.986667	0.0966667	0.530541	0.831437	1	1187425	1187647	AluJb	+	J	b	3	0.67	15	0.42	0.53	14	0.45	0.5	1743	167	0	32	223	10	124	8.97	55.61	0.58
539	0.8	4	0.91	5	1	5	0.9	5	0.8	5	0.92	4	5	0.873333	0.903333	0.03	0.448121	0.780407	1	1188701	1188967	AluJb	-	J	b	0	0	11	0.37	0.5	20	0.54	0.55	1581	154	67	4	267	5	155	3.75	58.05	0.22
543	1	7	1	3	0.75	4	1	4	1	5	1	3	14	1	0.916667	-0.0833333	0.315609	0.723448	1	1197261	1197536	AluSp	-	S	p	0	0	8	0.28	0.48	12	0.32	0.56	2247	83	4	0	276	14	157	10.14	56.88	0.64
551	1	4	0.83	4	1	5	1	4	0.93	5	0.92	4	6	0.95	0.943333	-0.00666667	0.740043	0.936558	1	1204076	1204345	AluJr	-	J	r	0	0	18	0.4	0.6	8	0.18	0.6	1668	156	78	0	270	6	141	4.44	52.22	0.33
552	0.88	4	0.71	3	1	4	0.89	3	0.95	4	0.7	5	8	0.846667	0.863333	0.0166667	0.654486	0.897764	1	1204838	1205143	AluSq	-	S	q	0	0	9	0.19	0.61	11	0.36	0.5	2303	98	0	13	306	8	156	5.23	50.98	0.4
573	0.93	6	1	6	0.97	6	0.83	6	1	6	1	6	6	0.943333	0.966667	0.0233333	0.971455	1	1	1252330	1252473	AluJr	-	J	r	0	0	18	0.6	0.49	13	0.45	0.48	777	97	104	49	144	6	89	8.33	61.81	0.45
575	0.74	9	0.59	8	1	8	0.71	7	1	7	1	7	18	0.903333	0.776667	-0.126667	0.425698	0.763895	1	1253245	1253549	AluY	-	Y	None	0	0	8	0.33	0.44	6	0.24	0.45	2348	39	3	43	305	18	176	11.8	57.7	0.71
583	0.9	3	0.89	3	0.28	3	0.94	3	0.87	3	1	3	3	0.936667	0.69	-0.246667	0.147381	0.562042	1	1298679	1298800	AluJo	-	J	o	0	0	14	0.42	0.52	17	0.55	0.5	649	139	74	41	122	3	70	4.92	57.38	0.3
600	0.64	7	0.5	6	0.71	8	0.87	6	0.71	7	0.85	7	8	0.81	0.616667	-0.193333	0.0847432	0.500778	1	1304855	1305138	AluJr	-	J	r	0	0	15	0.48	0.5	20	0.67	0.49	1770	162	35	0	284	8	158	5.63	55.63	0.37
602	0.33	3	1	3	0.92	4	0.8	5	0.93	4	0.92	4	11	0.883333	0.75	-0.133333	0.984396	1	1	1305655	1305951	AluSg	+	S	g	18	1	21	0.71	0.49	19	0.38	0.63	2275	111	3	0	297	11	159	7.41	53.54	0.52
608	0.78	5	1	10	0.8	5	0.73	5	0.65	5	1	3	13	0.793333	0.86	0.0666667	0.822806	0.968418	1	1313552	1313863	AluSx	-	S	x	0	0	13	0.43	0.5	17	0.54	0.51	1871	122	26	51	312	13	160	8.33	51.28	0.65
626	1	3	0.89	3	0.8	5	1	3	1	3	1	3	5	1	0.896667	-0.103333	0.0835614	0.500778	1	1320971	1321014	AluYb8	-	Y	b8	0	0	25	0.62	0.57	9	0.29	0.5	414	79	16	16	44	5	33	22.73	75	0.83
627	0.91	9	1	9	1	9	1	6	0.98	9	0.93	7	13	0.97	0.97	0	0.877889	0.98538	1	1323621	1323923	AluSc	+	S	c	26	0.85	19	0.47	0.57	10	0.32	0.5	2193	119	7	0	303	13	163	8.58	53.8	0.59
650	0.86	7	0.83	8	0.93	8	0.74	8	0.88	8	0.82	7	8	0.813333	0.873333	0.06	0.366779	0.72739	1	1339226	1339524	AluSx	-	S	x	0	0	10	0.39	0.47	17	0.54	0.51	1673	167	20	30	299	8	159	5.35	53.18	0.39
656	0.86	16	0.58	13	0.78	17	0.79	16	0.68	15	0.8	16	17	0.756667	0.74	-0.0166667	0.970736	1	1	1341455	1341746	AluSz	+	S	z	12	0.92	6	0.25	0.45	34	0.73	0.65	1997	137	20	0	292	17	160	11.64	54.79	0.78
657	0.04	23	0	23	0	21	0.17	23	0	23	0	19	23	0.06	0.0166667	-0.0433333	0.619492	0.879635	1	1343098	1343333	AluSx3	-	S	x3	0	0	62	0.98	0.72	14	0.52	0.47	854	166	254	0	236	23	151	19.49	63.98	0.95
658	0.48	10	0.51	8	0.6	7	0.8	10	0.47	10	0.7	9	11	0.656667	0.53	-0.126667	0.310594	0.723448	1	1343382	1343668	AluJr	+	J	r	13	0.85	51	0.92	0.67	8	0.55	0.34	1800	139	0	21	287	11	164	7.67	57.14	0.47
659	0.75	10	1	9	0.98	7	1	8	1	8	1	10	13	1	0.91	-0.09	0.206225	0.642504	1	1344143	1344396	AluSz	-	S	z	0	0	8	0.53	0.35	16	0.44	0.54	1841	126	0	0	254	13	127	10.24	50	0.83
661	1	6	0.94	6	0.73	5	1	5	0.96	6	1	6	9	0.986667	0.89	-0.0966667	0.247119	0.691356	1	1344547	1344828	AluSx1	+	S	x1	21	0.81	21	0.71	0.49	5	0.18	0.47	1903	128	75	0	282	9	156	6.38	55.32	0.42
670	0.92	11	0.92	11	0.78	11	0.86	11	0.97	10	0.95	8	11	0.926667	0.873333	-0.0533333	0.31946	0.723448	1	1360193	1360481	AluJb	+	J	b	8	1	16	0.47	0.53	18	0.52	0.53	1758	180	3	3	289	11	164	7.61	56.75	0.48
678	0.6	7	0.68	7	0.62	7	1	3	0.1	4	0.62	4	7	0.573333	0.633333	0.06	0.82003	0.967138	1	1379054	1379378	AluJb	-	J	b	0	0	18	0.46	0.56	8	0.19	0.59	2001	153	33	0	325	7	147	4.31	45.23	0.43
691	0.12	4	0.22	3	0.5	3	0.38	4	0.62	6	0.38	6	8	0.46	0.28	-0.18	0.218758	0.657956	1	1383653	1383972	AluSx1	-	S	x1	0	0	13	0.47	0.47	17	0.59	0.48	2107	112	0	53	320	8	164	5	51.25	0.38
692	0.11	9	0.61	9	0.2	7	0.33	9	0.1	5	0.41	5	11	0.28	0.306667	0.0266667	0.930583	1	1	1384153	1384450	AluSc8	-	S	c8	0	0	13	0.45	0.48	2	0.11	0.43	2016	121	24	17	298	11	157	7.38	52.68	0.53
694	0.67	3	0.7	5	0.75	4	1	4	1	5	1	4	10	1	0.706667	-0.293333	7.80761e-05	0.100154	1	1386425	1386714	AluY	-	Y	None	0	0	25	0.52	0.64	15	0.42	0.54	2243	83	21	7	290	10	160	6.9	55.17	0.45
695	0.92	4	0.81	3	0.33	3	1	3	0.78	3	0.77	3	9	0.85	0.686667	-0.163333	0.358951	0.726678	1	1386724	1387025	AluSx1	-	S	x1	0	0	19	0.46	0.58	22	0.51	0.59	2267	113	3	0	302	9	156	5.96	51.66	0.45
699	0.5	4	0.74	6	1	7	0.9	7	1	5	0.89	6	7	0.93	0.746667	-0.183333	0.479445	0.79784	1	1389024	1389320	AluSp	-	S	p	0	0	12	0.34	0.53	25	0.57	0.6	2155	125	0	3	297	7	155	4.71	52.19	0.35
704	1	4	0.83	3	0.75	4	0.62	4	1	3	0.93	5	13	0.85	0.86	0.01	0.930143	1	1	1393667	1393959	AluSp	-	S	p	0	0	8	0.26	0.5	14	0.4	0.53	2007	123	17	17	293	13	165	8.87	56.31	0.58
712	0.5	6	0.97	5	0.8	5	1	3	0.86	7	0.9	4	13	0.92	0.756667	-0.163333	0.339219	0.723448	1	1400264	1400568	AluSx	-	S	x	0	0	9	0.3	0.49	12	0.48	0.45	2278	95	0	10	305	13	166	8.52	54.43	0.58
714	1	4	0.67	6	0.8	5	0.8	5	0.5	4	1	3	8	0.766667	0.823333	0.0566667	0.887417	0.98889	1	1401389	1401644	AluSp	+	S	p	22	1	5	0.26	0.4	8	0.32	0.46	1915	113	4	0	256	8	128	6.25	50	0.5
722	0.44	16	0.04	9	0.22	9	0.3	9	0.11	14	0.08	12	18	0.163333	0.233333	0.07	0.8085	0.962036	1	1408209	1408500	AluSx3	-	S	x3	0	0	22	0.6	0.55	23	0.68	0.52	1946	113	41	7	292	18	162	12.33	55.48	0.81
725	0.8	5	1	5	0.98	7	1	3	0.97	8	1	6	11	0.99	0.926667	-0.0633333	0.371202	0.730902	1	1408884	1409173	AluSc5	-	S	c5	0	0	25	0.67	0.55	15	0.41	0.54	2047	128	0	0	290	11	155	7.59	53.45	0.55
730	1	3	1	4	1	8	1	6	0.67	6	1	3	9	0.89	1	0.11	0.311311	0.723448	1	1412195	1412402	AluSx	-	S	x	0	0	21	0.61	0.53	18	0.44	0.58	1439	149	0	0	208	9	116	8.65	55.77	0.56
731	0.83	3	1	3	1	3	0.89	3	1	3	1	3	3	0.963333	0.943333	-0.02	0.890642	0.989146	1	1412406	1412603	AluSx3	-	S	x3	0	0	21	0.56	0.55	23	0.61	0.57	1064	177	61	0	198	3	101	3.03	51.01	0.23
733	1	5	1	5	1	6	0.86	7	1	6	0.92	6	8	0.926667	1	0.0733333	0.0893954	0.500778	1	1413386	1413676	AluSx1	-	S	x1	0	0	24	0.67	0.54	22	0.42	0.65	1948	141	17	0	291	8	155	5.5	53.26	0.39
735	1	5	1	4	1	5	1	4	1	3	1	5	5	1	1	0	1	1	1	1418186	1418390	AluJb	+	J	b	10	0.9	20	0.4	0.63	16	0.5	0.51	1276	171	15	0	205	5	108	4.88	52.68	0.35
736	1	7	1	6	0.96	8	0.89	9	0.92	7	0.83	8	11	0.88	0.986667	0.106667	0.0124913	0.306361	1	1418392	1418697	AluSc8	+	S	c8	13	0.85	13	0.33	0.56	10	0.3	0.52	1615	144	36	62	306	11	157	7.19	51.31	0.56
739	0.82	6	0.95	10	0.84	15	1	6	0.97	12	1	4	16	0.99	0.87	-0.12	0.0134394	0.314876	1	1419565	1419860	AluY	-	Y	None	0	0	22	0.54	0.57	17	0.45	0.55	2081	112	10	17	296	16	157	10.81	53.04	0.77
741	1	5	0.95	5	0.95	5	0.95	5	0.93	5	0.97	4	11	0.95	0.966667	0.0166667	0.460773	0.78373	1	1422590	1422884	AluY	+	Y	None	17	0.94	13	0.26	0.63	20	0.4	0.64	2365	75	7	0	295	11	163	7.46	55.25	0.5
743	1	7	0.9	7	0.86	7	1	4	0.94	6	0.95	7	7	0.963333	0.92	-0.0433333	0.582287	0.861128	1	1423642	1423858	AluJb	-	J	b	0	0	17	0.4	0.58	12	0.41	0.48	918	200	106	84	217	7	110	6.45	50.69	0.5
747	0.95	10	1	5	0.92	9	1	7	1	7	1	7	11	1	0.956667	-0.0433333	0.104514	0.506562	1	1426634	1426922	AluSc5	+	S	c5	13	0.85	17	0.36	0.62	11	0.33	0.52	2109	118	10	0	289	11	155	7.61	53.63	0.53
771	0.87	5	0.67	4	0.81	5	0.9	7	0.7	4	0.83	4	9	0.81	0.783333	-0.0266667	0.746902	0.939232	1	1437248	1437550	AluSx1	-	S	x1	0	0	15	0.49	0.49	19	0.57	0.52	2208	125	3	0	303	9	154	5.94	50.83	0.46
775	0.56	3	0.96	5	0.33	3	0.95	7	0.82	6	0.83	6	10	0.866667	0.616667	-0.25	0.367199	0.72739	1	1439362	1439665	AluSx	-	S	x	0	0	18	0.42	0.59	15	0.41	0.54	2028	135	6	3	304	10	154	6.58	50.66	0.51
778	0.82	7	0.92	7	0.76	8	1	8	0.95	7	0.81	8	8	0.92	0.833333	-0.0866667	0.210228	0.647082	1	1441783	1441939	FRAM	-	FRAM	None	0	0	9	0.32	0.48	10	0.45	0.42	718	248	57	0	157	8	88	10.19	56.05	0.65
783	0.83	4	0.94	10	1	7	0.87	9	1	8	0.97	8	13	0.946667	0.923333	-0.0233333	0.75622	0.942936	1	1445870	1446173	AluSx	-	S	x	0	0	10	0.28	0.53	13	0.49	0.48	2123	118	30	3	304	13	165	8.55	54.28	0.58
784	0.39	3	0.47	3	0.78	3	0.75	3	0.81	3	0.56	3	3	0.706667	0.546667	-0.16	0.32252	0.723448	1	1446178	1446263	AluSz6	-	S	z6	0	0	21	0.55	0.55	11	0.46	0.46	526	116	23	35	86	3	40	6.98	46.51	0.65
786	1	7	1	7	1	5	1	5	0.97	5	0.91	8	8	0.96	1	0.04	0.140576	0.553225	1	1450249	1450470	AluSx3	-	S	x3	0	0	23	0.55	0.58	16	0.5	0.51	1317	198	0	0	222	8	115	7.21	51.8	0.54
787	1	4	1	3	1	4	1	4	1	5	1	6	10	1	1	0	1	1	1	1450474	1450756	AluSx1	-	S	x1	0	0	21	0.59	0.53	14	0.48	0.48	1853	141	39	0	283	10	154	7.07	54.42	0.48
789	0.97	8	1	9	1	11	0.8	9	0.97	8	0.97	10	11	0.913333	0.986667	0.0733333	0.110205	0.512288	1	1452092	1452391	AluSx1	-	S	x1	0	0	18	0.49	0.54	25	0.47	0.66	1926	160	20	0	300	11	150	7.33	50	0.6
792	1	6	0.9	5	0.86	7	0.9	7	0.94	7	1	6	15	0.946667	0.92	-0.0266667	0.772673	0.948588	1	1456403	1456708	AluY	+	Y	None	30	1	11	0.27	0.57	20	0.5	0.57	2311	72	7	26	306	15	157	9.8	51.31	0.75
796	0.75	6	0.71	8	0.94	7	0.95	7	0.85	7	0.81	6	8	0.87	0.8	-0.07	0.54908	0.842707	1	1461106	1461387	AluJb	-	J	b	0	0	19	0.51	0.55	14	0.4	0.53	1576	195	21	7	282	8	152	5.67	53.9	0.39
801	1	5	1	3	1	7	1	4	0.94	4	0.8	5	7	0.913333	1	0.0866667	0.104593	0.506562	1	1466253	1466544	AluSx	+	S	x	7	1	23	0.66	0.53	15	0.47	0.51	1745	164	3	24	292	7	153	4.79	52.4	0.35
807	0.93	5	0.97	5	1	5	0.93	5	1	5	0.97	5	5	0.966667	0.966667	0	1	1	1	1476707	1476797	FRAM	-	FRAM	None	0	0	39	0.61	0.72	19	0.46	0.57	523	132	44	0	91	5	65	10.99	71.43	0.46
811	1	4	1	12	0.96	8	0.95	10	1	11	1	11	16	0.983333	0.986667	0.00333333	0.916259	0.995572	1	1481935	1482264	AluSx	+	S	x	41	0.88	13	0.37	0.53	15	0.37	0.57	2148	115	0	55	330	16	176	9.7	53.33	0.68
814	1	3	0.64	6	0.94	8	0.92	6	0.94	6	0.86	7	16	0.906667	0.86	-0.0466667	0.788137	0.955213	1	1484620	1484928	AluY	+	Y	None	30	0.9	12	0.32	0.55	14	0.43	0.51	2442	84	7	0	309	16	170	10.36	55.02	0.69
818	0.93	5	0.94	8	1	3	1	3	1	5	0.88	4	11	0.96	0.956667	-0.00333333	0.68887	0.913049	1	1488119	1488419	AluSz	+	S	z	21	1	11	0.28	0.56	14	0.5	0.48	2251	106	7	0	301	11	153	7.31	50.83	0.57
821	0.96	4	0.87	5	0.94	5	1	4	0.95	5	1	5	5	0.983333	0.923333	-0.06	0.0783583	0.500778	1	1491096	1491383	AluJr	+	J	r	10	0.9	22	0.48	0.61	15	0.42	0.53	1619	194	21	3	288	5	154	3.47	53.47	0.25
828	0.95	3	0.56	3	1	3	0.93	3	0.67	3	1	3	3	0.866667	0.836667	-0.03	0.981386	1	1	1493601	1493768	AluJb	+	J	b	21	0.71	10	0.33	0.5	9	0.3	0.49	704	238	18	24	168	3	95	3.57	56.55	0.22
832	0.93	5	0.83	4	0.8	5	0.78	4	0.9	5	0.93	5	5	0.87	0.853333	-0.0166667	0.785515	0.954083	1	1495578	1495806	AluJo	-	J	o	0	0	12	0.38	0.5	7	0.28	0.44	1064	196	183	0	229	5	130	4.37	56.77	0.28
838	1	5	1	6	0.9	5	1	5	1	6	1	4	17	1	0.966667	-0.0333333	0.339508	0.723448	1	1500438	1500736	AluY	+	Y	None	0	0	17	0.58	0.48	11	0.36	0.5	2010	50	0	114	299	17	179	11.37	59.87	0.65
839	0.92	6	0.81	6	1	6	0.86	7	1	5	1	6	8	0.953333	0.91	-0.0433333	0.504204	0.814112	1	1501357	1501662	AluSz6	+	S	z6	18	0.89	13	0.42	0.5	15	0.58	0.46	1844	157	3	29	306	8	157	5.23	51.31	0.4
840	0.86	7	0.91	9	0.65	10	1	8	1	4	0.83	8	15	0.943333	0.806667	-0.136667	0.101187	0.503913	1	1501951	1502249	AluY	+	Y	None	15	1	9	0.41	0.42	15	0.42	0.54	2330	80	0	10	299	15	165	10.03	55.18	0.67
842	1	4	0.91	8	0.73	5	0.9	5	0.83	6	1	8	10	0.91	0.88	-0.03	0.903363	0.99349	1	1503711	1504002	AluSz6	+	S	z6	6	1	15	0.57	0.46	13	0.38	0.53	1868	96	3	62	292	10	150	6.85	51.37	0.52
845	1	5	0.73	5	0.93	5	0.92	5	0.83	5	0.72	5	5	0.823333	0.886667	0.0633333	0.341358	0.723747	1	1504879	1505182	AluJo	-	J	o	0	0	15	0.59	0.45	7	0.36	0.4	1322	204	20	59	304	5	162	3.29	53.29	0.23
846	0.69	4	0.44	4	0.72	4	0.79	4	0.79	4	0.88	4	4	0.82	0.616667	-0.203333	0.0871631	0.500778	1	1505529	1505682	AluJo	+	J	o	19	0.95	5	0.25	0.41	11	0.4	0.47	722	208	91	19	154	4	75	5.19	48.7	0.44
850	0.33	3	1	7	1	7	1	5	0.67	6	1	3	14	0.89	0.776667	-0.113333	0.813792	0.96419	1	1507175	1507474	AluY	-	Y	None	0	0	12	0.51	0.44	16	0.51	0.5	2305	70	0	27	300	14	170	9.33	56.67	0.59
855	0.62	6	0.06	8	0.48	8	0.75	8	0.49	8	0.9	8	8	0.713333	0.386667	-0.326667	0.138187	0.551932	1	1508908	1508994	AluSx	-	S	x	0	0	19	0.67	0.48	15	0.77	0.4	624	115	0	0	87	8	57	18.39	65.52	0.86
856	0	6	0	6	0.13	8	0.33	3	0.25	10	0.25	8	25	0.276667	0.0433333	-0.233333	0.0208736	0.36411	1	1511094	1511391	AluY	+	Y	None	18	0.94	24	0.82	0.49	2	0.09	0.42	2592	34	0	0	298	25	181	16.78	60.74	0.91
857	0.67	5	0.82	4	0.92	6	0.72	5	1	8	0.94	6	13	0.886667	0.803333	-0.0833333	0.30039	0.723448	1	1511937	1512235	AluSc	+	S	c	21	0.9	1	0.05	0.39	1	0.06	0.36	2243	120	0	0	299	13	158	8.7	52.84	0.63
867	0.74	6	0.56	8	0.3	4	0.77	6	1	7	0.75	6	11	0.84	0.533333	-0.306667	0.113158	0.516537	1	1517406	1517700	AluSc8	+	S	c8	27	0.74	4	0.18	0.42	2	0.09	0.43	1975	115	54	10	295	11	157	7.46	53.22	0.53
876	0.67	7	0.75	4	0.77	5	0.83	6	0.86	7	1	5	16	0.896667	0.73	-0.166667	0.121155	0.524885	1	1522293	1522599	AluSx1	-	S	x1	0	0	21	0.66	0.51	24	0.65	0.54	2160	117	13	3	307	16	161	10.42	52.44	0.76
884	0.89	7	0.58	6	0.9	5	0.07	7	0.92	6	1	4	14	0.663333	0.79	0.126667	0.978919	1	1	1524874	1525149	AluY	-	Y	None	0	0	16	0.57	0.48	20	0.56	0.54	2213	80	0	0	276	14	157	10.14	56.88	0.63
887	0.75	4	1	4	1	4	0.75	4	0.89	3	1	4	14	0.88	0.916667	0.0366667	0.569989	0.855765	1	1526643	1526937	AluSx	-	S	x	0	0	12	0.38	0.5	13	0.38	0.52	2484	64	0	0	295	14	168	9.49	56.95	0.59
889	1	6	0.87	6	0.75	6	0.94	6	1	6	0.89	7	10	0.943333	0.873333	-0.07	0.617751	0.879157	1	1527616	1527940	AluSx	+	S	x	43	0.72	13	0.37	0.53	21	0.59	0.54	2183	107	0	7	325	10	163	6.15	50.15	0.49
899	1	4	1	3	0.6	5	1	5	0.79	4	1	5	7	0.93	0.866667	-0.0633333	0.851023	0.977308	1	1543821	1544136	AluJo	+	J	o	28	0.71	4	0.19	0.41	17	0.58	0.48	1989	155	0	19	316	7	161	4.43	50.95	0.35
909	0	8	0.13	10	0	6	0.25	6	0.15	10	0.17	13	18	0.19	0.0433333	-0.146667	0.044729	0.452378	1	1550115	1550424	AluSg	+	S	g	29	0.86	17	0.48	0.54	53	0.9	0.69	2331	113	0	0	310	18	169	11.61	54.52	0.79
923	1	3	1	3	1	3	1	3	1	3	1	4	4	1	1	0	1	1	1	1584768	1585066	AluSx	-	S	x	0	0	17	0.5	0.53	7	0.27	0.46	2140	141	0	0	299	4	149	2.68	49.83	0.22
929	0.9	5	0.79	7	0.83	6	0.87	5	0.95	7	0.96	8	11	0.926667	0.84	-0.0866667	0.118704	0.522706	1	1587096	1587336	AluSc	+	S	c	4	0.5	7	0.32	0.42	6	0.28	0.41	1590	108	162	0	241	11	136	9.13	56.43	0.57
944	1	3	0.98	3	1	3	1	3	0.94	3	1	3	3	0.98	0.993333	0.0133333	0.585939	0.862642	1	1598048	1598088	AluSc5	+	S	c5	1	1	16	0.42	0.55	22	0.49	0.61	311	133	33	17	41	3	28	14.63	68.29	0.63
948	1	5	0.83	3	0.92	4	1	3	1	4	1	4	15	1	0.916667	-0.0833333	0.0907667	0.500778	1	1598263	1598557	AluSx	+	S	x	10	0.9	13	0.32	0.57	19	0.63	0.49	2238	92	3	3	295	15	168	10.17	56.95	0.63
961	0.7	5	0.43	7	0.67	3	0.75	4	0	3	0.69	4	18	0.48	0.6	0.12	0.456265	0.78068	1	1608907	1609189	AluY	-	Y	None	0	0	20	0.55	0.54	25	0.6	0.59	2180	64	0	32	283	18	147	12.72	51.94	0.95
969	0.95	4	1	4	0.96	4	1	4	1	3	1	3	4	1	0.97	-0.03	0.120423	0.523583	1	1613458	1613597	AluSx	-	S	x	0	0	19	0.57	0.52	21	0.62	0.52	1605	164	0	115	140	4	67	5.71	47.86	0.5
971	1	4	0.94	4	0.97	4	1	4	0.94	4	1	4	4	0.98	0.97	-0.01	0.649548	0.895397	1	1615425	1615491	AluJo	+	J	o	0	0	12	0.31	0.56	22	0.51	0.59	431	164	0	0	67	4	44	11.94	65.67	0.56
974	0.8	5	0.9	5	0.72	5	1	4	0.81	7	0.6	5	7	0.803333	0.806667	0.00333333	0.606789	0.874353	1	1616581	1616881	AluJb	+	J	b	30	0.87	14	0.42	0.52	15	0.48	0.5	1806	169	43	13	301	7	151	4.65	50.17	0.38
980	1	5	0.88	4	1	4	1	4	0.88	4	1	4	6	0.96	0.96	0	1	1	1	1618734	1618896	AluSx	+	S	x	20	0.75	24	0.63	0.55	14	0.43	0.51	1594	153	12	72	163	6	77	7.36	47.24	0.66
983	0.39	7	0.83	3	1	3	1	3	0.83	3	0.89	3	14	0.906667	0.74	-0.166667	0.601288	0.871215	1	1619764	1620051	AluSc8	+	S	c8	13	0.85	13	0.47	0.47	21	0.59	0.54	2113	115	21	0	288	14	167	9.72	57.99	0.58
991	0.64	11	0.68	13	0.82	11	1	13	0.95	11	0.92	12	19	0.956667	0.713333	-0.243333	0.0166151	0.335302	1	1625443	1625755	AluSx	+	S	x	23	0.74	41	0.94	0.59	24	0.59	0.57	1961	114	0	28	313	19	170	12.14	54.31	0.83
1010	0.92	6	0.88	8	0.94	6	0.95	7	1	4	1	6	14	0.983333	0.913333	-0.07	0.0389759	0.43499	1	1651053	1651353	AluY	-	Y	None	0	0	5	0.24	0.41	13	0.48	0.47	2370	80	3	3	301	14	161	9.3	53.49	0.66
1014	0.79	7	0.51	5	0.6	5	0.68	5	0.77	7	0.93	5	10	0.793333	0.633333	-0.16	0.218799	0.657956	1	1652398	1652649	AluY	+	Y	None	13	0.92	8	0.27	0.5	10	0.37	0.47	1336	143	143	20	252	10	135	7.94	53.57	0.57
1024	0.95	7	1	9	1	5	0.96	8	1	4	0.9	5	11	0.953333	0.983333	0.03	0.422491	0.761599	1	1657673	1657970	AluY	-	Y	None	0	0	25	0.69	0.54	12	0.37	0.51	1874	114	20	30	298	11	166	7.38	55.7	0.48
1032	1	5	1	8	1	6	1	9	1	7	1	6	13	1	1	0	1	1	1	1662535	1662842	AluY	+	Y	None	23	0.91	21	0.48	0.59	11	0.37	0.49	2181	120	0	13	308	13	164	8.44	53.25	0.61
1046	1	3	1	3	0.96	12	1	3	0.67	7	0.83	7	18	0.833333	0.986667	0.153333	0.164865	0.587487	1	1671765	1672059	AluY	-	Y	None	0	0	20	0.54	0.54	13	0.4	0.51	2280	85	0	3	295	18	165	12.2	55.93	0.78
1062	0.8	5	0.53	5	0.7	5	1	6	1	7	0.8	10	13	0.933333	0.676667	-0.256667	0.0407638	0.441125	1	1686263	1686557	AluSc	-	S	c	0	0	22	0.43	0.64	11	0.3	0.54	2380	75	3	3	295	13	164	8.81	55.59	0.58
1063	1	4	0.7	4	0.83	3	0.97	4	1	4	1	4	4	0.99	0.843333	-0.146667	0.139685	0.552464	1	1692279	1692434	AluJb	-	J	b	2	1	24	0.47	0.64	14	0.42	0.52	1568	183	14	10	156	4	85	5.13	54.49	0.36
1070	1	8	1	7	0.93	7	1	5	0.97	6	1	4	10	0.99	0.976667	-0.0133333	0.703341	0.919257	1	1697069	1697353	AluSq2	+	S	q2	4	1	14	0.68	0.41	11	0.39	0.48	2050	109	25	18	285	10	153	7.02	53.68	0.49
1079	1	6	0.79	11	0.74	9	1	3	0.94	8	1	3	17	0.98	0.843333	-0.136667	0.207661	0.644011	1	1700704	1701017	AluSx1	+	S	x1	28	0.89	9	0.3	0.49	9	0.33	0.47	2325	99	0	13	314	17	172	10.83	54.78	0.72
1092	0.91	8	1	6	1	5	1	5	0.85	8	1	9	14	0.95	0.97	0.02	0.866919	0.982846	1	1705673	1705992	AluSp	-	S	p	0	0	3	0.14	0.41	23	0.66	0.53	2124	81	6	78	320	14	176	8.75	55	0.58
1093	1	6	0.96	6	1	6	1	6	0.92	6	0.92	6	6	0.946667	0.986667	0.04	0.283864	0.723448	1	1706001	1706052	AluYc	-	Y	c	0	0	14	0.58	0.44	19	0.56	0.52	376	77	19	0	52	6	39	23.08	75	0.82
1094	0.83	5	0.96	5	1	5	1	5	1	5	1	4	5	1	0.93	-0.07	0.126357	0.532593	1	1706060	1706128	FLAM_C	-	FLAM_C	None	0	0	20	0.63	0.51	15	0.56	0.46	283	120	25	4	69	5	43	14.49	62.32	0.75
1098	0.26	7	0.65	7	0.54	7	0.68	7	0.79	7	0.68	7	7	0.716667	0.483333	-0.233333	0.123246	0.527929	1	1710922	1711106	AluJb	-	J	b	0	0	29	0.56	0.64	9	0.25	0.53	1320	186	59	28	185	7	92	7.57	49.73	0.63
1101	0.42	8	0.73	4	0.73	7	0.9	5	0.41	6	0.58	6	11	0.63	0.626667	-0.00333333	0.850956	0.977288	1	1713209	1713489	AluSx	-	S	x	0	0	5	0.12	0.58	35	0.66	0.66	2091	103	11	4	281	11	158	7.83	56.23	0.5
1107	1	6	0.96	6	1	5	0.88	5	1	4	0.84	5	9	0.906667	0.986667	0.08	0.20496	0.640938	1	1719192	1719491	AluSg	+	S	g	24	0.92	15	0.49	0.5	9	0.22	0.58	2172	127	3	0	300	9	157	6	52.33	0.44
1110	1	3	0.9	8	0.74	6	0.89	3	1	4	1	5	9	0.963333	0.88	-0.0833333	0.377886	0.735821	1	1723855	1724160	AluSc	+	S	c	25	0.96	5	0.23	0.42	7	0.28	0.45	2189	121	0	7	306	9	155	5.88	50.65	0.46
1111	1	4	0.88	3	1	4	1	4	0.85	4	1	3	7	0.95	0.96	0.01	0.943378	1	1	1724223	1724516	AluSq2	+	S	q2	13	1	9	0.37	0.44	9	0.27	0.52	2201	116	7	0	294	7	152	4.76	51.7	0.36
1114	1	4	0.95	3	0.89	3	1	3	1	3	1	3	7	1	0.946667	-0.0533333	0.105671	0.506836	1	1726923	1727205	AluSx1	+	S	x1	14	0.93	11	0.3	0.55	4	0.16	0.45	2029	92	64	18	283	7	153	4.95	54.06	0.35
1122	1	4	0.94	4	1	4	0.88	4	1	4	0.94	4	4	0.94	0.98	0.04	0.381401	0.735821	1	1734756	1735019	AluJr	-	J	r	0	0	2	0.11	0.38	11	0.38	0.48	1440	189	64	0	264	4	150	3.03	56.82	0.19
1131	1	9	0.88	10	0.7	5	0.89	9	1	7	0.83	6	15	0.906667	0.86	-0.0466667	0.836252	0.9727	1	1739450	1739744	AluSp	-	S	p	0	0	19	0.57	0.52	5	0.22	0.43	2151	105	14	7	295	15	154	10.17	52.2	0.76
1133	0.89	3	0.93	7	1	6	1	6	0.79	6	0.91	7	7	0.9	0.94	0.04	0.766849	0.948148	1	1740629	1740889	AluSz6	-	S	z6	0	0	4	0.18	0.43	6	0.24	0.45	1644	107	169	4	261	7	131	5.36	50.19	0.43
1150	1	6	1	6	1	5	1	8	0.97	6	0.98	7	12	0.983333	1	0.0166667	0.219442	0.658409	1	1750665	1750959	AluSx	-	S	x	0	0	12	0.55	0.42	8	0.28	0.48	2153	102	7	10	295	12	162	8.14	54.92	0.54
1155	1	8	1	7	1	5	1	4	1	8	1	3	15	1	1	0	1	1	1	1753733	1754053	AluY	-	Y	None	0	0	7	0.26	0.47	13	0.48	0.46	2353	59	3	47	321	15	170	9.35	52.96	0.69
1180	0.83	3	1	5	0.8	5	0.9	5	0.9	5	1	3	8	0.933333	0.876667	-0.0566667	0.701416	0.918914	1	1768993	1769299	AluSc	-	S	c	0	0	12	0.53	0.43	9	0.35	0.45	2058	114	13	23	307	8	161	5.21	52.44	0.38
1185	0.6	5	0.82	6	0.7	5	0.75	7	0.5	8	1	6	11	0.75	0.706667	-0.0433333	0.47324	0.79356	1	1771314	1771686	AluSx1	+	S	x1	19	0.95	5	0.22	0.43	13	0.42	0.5	1668	105	0	196	373	11	166	5.9	44.5	0.6
1191	0.58	6	0.8	5	0.78	6	1	6	0.67	6	0.88	5	6	0.85	0.72	-0.13	0.233968	0.675319	1	1774670	1774964	AluJo	-	J	o	0	0	7	0.32	0.42	14	0.45	0.5	1738	169	0	24	295	6	158	4.07	53.56	0.28
1205	1	3	0.95	5	0.83	3	0.77	4	1	4	0.94	7	12	0.903333	0.926667	0.0233333	0.877086	0.985353	1	1783201	1783498	AluSp	+	S	p	16	0.88	8	0.3	0.46	24	0.74	0.51	2200	97	3	0	298	12	159	8.05	53.36	0.57
1206	0.89	3	0.92	3	1	3	1	3	0.83	3	0.94	3	3	0.923333	0.936667	0.0133333	0.953174	1	1	1783577	1783677	AluJb	+	J	b	3	1	14	0.52	0.46	21	0.62	0.52	1153	176	139	40	101	3	58	5.94	57.43	0.36
1207	1	6	0.69	8	0.9	5	1	5	0.62	8	1	5	20	0.873333	0.863333	-0.01	0.670304	0.905894	1	1783678	1783968	AluY	-	Y	None	0	0	17	0.55	0.5	6	0.2	0.5	2212	72	0	7	291	20	168	13.75	57.73	0.85
1209	0.91	3	0.88	3	0.96	3	0.95	3	1	3	0.85	3	3	0.933333	0.916667	-0.0166667	0.508324	0.817335	1	1786065	1786195	FLAM_C	+	FLAM_C	None	13	0.85	2	0.09	0.42	13	0.37	0.53	587	197	0	43	131	3	61	4.58	46.56	0.44
1213	0.64	9	0.69	9	0.88	8	0.8	5	0.83	6	0.65	10	18	0.76	0.736667	-0.0233333	0.900046	0.992419	1	1786859	1787162	AluYf4	+	Y	f4	20	0.95	8	0.27	0.49	3	0.11	0.47	2497	33	0	13	304	18	177	11.84	58.22	0.7
1219	0.81	5	0.45	6	0.9	5	0.29	5	0.51	7	0.19	5	9	0.33	0.72	0.39	0.0552209	0.483811	1	1791166	1791304	AluY	+	Y	None	17	0.76	11	0.37	0.51	2	0.11	0.4	992	61	0	50	139	9	77	12.95	55.4	0.84
1224	0.8	5	1	6	0.5	4	0.81	8	1	6	0.65	9	12	0.82	0.766667	-0.0533333	0.891882	0.989525	1	1793358	1793671	AluJo	+	J	o	14	0.79	0	0	0.49	10	0.34	0.48	1314	156	45	102	314	12	172	7.64	54.78	0.51
1225	1	6	0.97	6	1	7	0.96	7	0.83	7	0.87	7	7	0.886667	0.99	0.103333	0.0212264	0.365573	1	1793901	1794197	AluJb	-	J	b	0	0	11	0.37	0.49	6	0.19	0.51	1661	165	30	3	297	7	155	4.71	52.19	0.35
1244	1	8	0.86	9	0.96	10	0.83	9	1	4	0.86	9	13	0.896667	0.94	0.0433333	0.656539	0.899091	1	1805762	1806071	AluSx	+	S	x	31	0.9	11	0.32	0.52	12	0.36	0.52	2038	116	7	13	310	13	172	8.39	55.48	0.55
1256	0.82	9	0.87	5	0.95	10	0.86	7	0.89	9	0.97	8	22	0.906667	0.88	-0.0266667	0.628768	0.884521	1	1811758	1812034	AluYc3	+	Y	c3	10	1	2	0.08	0.44	8	0.26	0.5	2211	50	11	0	277	22	167	15.88	60.29	0.88
1268	1	4	0.8	5	1	4	1	4	0.75	4	0.75	4	10	0.833333	0.933333	0.1	0.405037	0.750069	1	1817469	1817765	AluSx1	+	S	x1	9	0.89	17	0.6	0.48	6	0.31	0.41	1933	118	0	20	297	10	158	6.73	53.2	0.48
1270	1	9	0.7	5	1	3	0.42	6	0.62	4	0.93	8	15	0.656667	0.9	0.243333	0.126549	0.532962	1	1819072	1819351	AluSz6	-	S	z6	0	0	2	0.14	0.35	6	0.33	0.38	1880	111	46	0	280	15	155	10.71	55.36	0.74
1271	0.62	4	0.6	6	0.93	11	0.95	5	0.81	9	0.83	5	14	0.863333	0.716667	-0.146667	0.347086	0.723747	1	1819995	1820292	AluSq	+	S	q	14	0.79	10	0.38	0.46	4	0.25	0.38	2150	87	3	7	298	14	162	9.4	54.36	0.64
1277	0	4	0.34	5	0.17	5	0.3	5	0.53	5	0.24	5	5	0.356667	0.17	-0.186667	0.19555	0.629324	1	1828630	1828773	AluSx	-	S	x	0	0	18	0.53	0.52	12	0.39	0.5	1954	130	12	46	144	5	72	6.94	50	0.58
1287	0.94	4	0.78	4	0.89	4	0.92	4	0.79	4	0.94	4	4	0.883333	0.87	-0.0133333	0.833819	0.972003	1	1834437	1834545	FLAM_A	-	FLAM_A	None	0	0	17	0.58	0.48	13	0.45	0.49	467	184	211	18	109	4	60	7.34	55.05	0.49
1302	1	6	1	7	0.9	6	0.93	8	0.9	8	0.86	6	9	0.896667	0.966667	0.07	0.0938352	0.500778	1	1839449	1839749	AluSz	-	S	z	0	0	23	0.47	0.63	26	0.45	0.68	1767	130	10	47	301	9	157	5.98	52.16	0.44
1303	0.17	4	0.19	7	0	4	0.14	7	0.37	11	0.5	6	24	0.336667	0.12	-0.216667	0.149501	0.564668	1	1840848	1841145	AluSx1	+	S	x1	15	1	70	1	0.76	19	0.46	0.58	2583	44	0	0	298	24	181	16.11	60.74	0.88
1306	0.83	6	1	7	0.87	6	0.94	9	0.9	10	0.93	5	12	0.923333	0.9	-0.0233333	0.846447	0.977125	1	1844081	1844380	AluSc8	+	S	c8	21	1	14	0.48	0.49	15	0.44	0.52	2299	97	7	0	300	12	158	8	52.67	0.59
1311	0.58	6	0.62	6	0.65	3	0.67	6	0.67	3	0.88	4	16	0.74	0.616667	-0.123333	0.242986	0.686018	1	1862897	1863217	AluY	+	Y	None	7	1	12	0.51	0.44	21	0.61	0.53	2420	65	0	40	321	16	165	9.97	51.4	0.76
1320	0.71	7	0.85	5	0.32	4	0.7	5	1	8	0.75	4	9	0.816667	0.626667	-0.19	0.267121	0.713924	1	1868062	1868367	AluJr	+	J	r	22	0.91	17	0.55	0.5	19	0.61	0.51	2135	131	0	10	306	9	160	5.88	52.29	0.43
1327	1	3	1	3	0.74	3	1	3	0.9	3	0.82	3	3	0.906667	0.913333	0.00666667	0.649221	0.895291	1	1879880	1879999	AluJb	-	J	b	0	0	15	0.43	0.53	3	0.14	0.49	1055	228	198	8	120	3	60	5	50	0.4
1350	0.83	6	0.81	3	0.67	3	0.5	3	1	5	0.88	4	14	0.793333	0.77	-0.0233333	0.46695	0.788509	1	1918987	1919278	AluSg4	-	S	g4	0	0	16	0.33	0.63	18	0.56	0.51	2374	75	3	0	292	14	169	9.59	57.88	0.59
1351	1	4	1	4	1	4	1	4	0.92	3	1	4	4	0.973333	1	0.0266667	0.349605	0.723747	1	1919401	1919572	AluJb	-	J	b	0	0	25	0.62	0.57	14	0.38	0.54	884	157	151	6	172	4	90	4.65	52.33	0.35
1355	1	3	0.96	3	0.78	3	0.91	3	0.67	3	1	3	3	0.86	0.913333	0.0533333	0.732392	0.932401	1	1923607	1923905	AluJr	-	J	r	0	0	18	0.55	0.52	16	0.54	0.49	1786	184	3	13	299	3	149	2.01	49.83	0.17
1358	0.9	3	0.91	3	0.83	3	0.9	4	0.96	3	1	4	5	0.953333	0.88	-0.0733333	0.124771	0.530807	1	1924726	1925024	AluJo	-	J	o	0	0	10	0.41	0.44	18	0.59	0.49	2124	137	0	3	299	5	158	3.34	52.84	0.24
1364	0.92	3	0.89	5	0.67	5	0.8	3	0.94	4	1	3	8	0.913333	0.826667	-0.0866667	0.283045	0.723448	1	1928078	1928389	AluSx1	+	S	x1	30	0.93	12	0.52	0.43	20	0.69	0.48	2478	99	0	0	312	8	160	5.13	51.28	0.4
1370	0.57	7	0.4	5	0.79	10	0.75	6	0.68	6	0.65	8	16	0.693333	0.586667	-0.106667	0.481566	0.799458	1	1932757	1933064	AluY	-	Y	None	0	0	9	0.22	0.58	13	0.42	0.5	2501	62	10	0	308	16	169	10.39	54.87	0.7
1379	0.59	5	0.8	5	0.92	4	1	5	1	5	1	5	5	1	0.77	-0.23	0.00270553	0.182211	1	1938610	1938764	AluJr	-	J	r	0	0	3	0.15	0.41	7	0.3	0.43	806	200	0	26	155	5	92	6.45	59.35	0.39
1383	0.6	3	0.37	3	0.33	3	0.67	3	0.91	3	0.78	3	3	0.786667	0.433333	-0.353333	0.0333739	0.419091	1	1939908	1939984	AluJb	+	J	b	1	1	7	0.29	0.44	14	0.41	0.53	1249	154	12	54	77	3	31	7.79	40.26	0.96
1410	0.96	8	0.7	10	0.7	9	0.54	9	0.66	10	0.44	10	11	0.546667	0.786667	0.24	0.121289	0.52504	1	1975807	1976118	AluJr	-	J	r	0	0	5	0.17	0.52	57	0.83	0.74	1953	164	0	6	312	11	176	7.05	56.41	0.45
1411	0.7	4	0.69	6	0.73	4	0.44	5	0.73	5	0.61	7	8	0.593333	0.706667	0.113333	0.338532	0.723448	1	1976702	1977008	AluJb	+	J	b	29	0.83	57	0.8	0.75	12	0.33	0.58	1841	160	23	13	307	8	168	5.21	54.72	0.35
1413	0.71	7	0.48	11	0.85	8	0.86	7	0.81	8	0.69	7	15	0.786667	0.68	-0.106667	0.447069	0.77956	1	1984555	1984837	AluSg	-	S	g	0	0	13	0.28	0.61	11	0.25	0.61	1990	120	39	0	283	15	155	10.6	54.77	0.71
1427	1	4	0.9	5	1	5	0.97	6	1	3	0.97	5	6	0.98	0.966667	-0.0133333	0.950984	1	1	1997831	1998080	AluSx	-	S	x	0	0	4	0.23	0.38	3	0.17	0.38	1750	140	4	0	250	6	137	4.8	54.8	0.32
1437	0.77	9	1	8	1	10	0.88	8	1	10	0.75	9	15	0.876667	0.923333	0.0466667	0.534407	0.834077	1	2015389	2015697	AluSx1	+	S	x1	19	0.74	15	0.69	0.42	23	0.46	0.63	2282	94	0	26	309	15	171	9.71	55.34	0.64
1438	1	4	0.86	7	1	6	0.95	7	1	7	1	7	8	0.983333	0.953333	-0.03	0.716473	0.926173	1	2016163	2016467	AluJr	+	J	r	22	0.91	22	0.48	0.61	20	0.49	0.57	2078	125	7	13	305	8	165	5.25	54.1	0.36
1443	0.92	3	0.89	3	0.56	3	0.93	3	1	3	1	3	3	0.976667	0.79	-0.186667	0.0427038	0.447116	1	2021246	2021355	FLAM_A	+	FLAM_A	None	23	0.74	20	0.51	0.56	19	0.42	0.6	607	191	27	0	110	3	54	5.45	49.09	0.46
1445	1	4	0.93	5	0.94	7	0.88	4	0.88	4	1	4	13	0.92	0.956667	0.0366667	0.664912	0.903031	1	2030088	2030419	AluY	-	Y	None	0	0	11	0.36	0.5	20	0.54	0.54	2280	85	0	0	332	13	173	7.83	52.11	0.58
1448	0.93	6	1	6	0.77	7	0.91	5	0.93	6	1	4	7	0.946667	0.9	-0.0466667	0.749707	0.939839	1	2034337	2034575	AluJr	-	J	r	1	1	17	0.54	0.51	18	0.46	0.56	1501	138	67	4	239	7	133	5.86	55.65	0.38
1449	0.89	6	0.91	6	0.92	6	1	6	0.7	6	0.92	6	6	0.873333	0.906667	0.0333333	0.740869	0.936924	1	2035040	2035161	FRAM	+	FRAM	None	12	0.67	17	0.45	0.55	17	0.38	0.61	731	139	123	0	122	6	75	9.84	61.48	0.55
1461	0.86	7	1	4	0.66	5	0.88	4	1	7	0.6	5	8	0.826667	0.84	0.0133333	0.986217	1	1	2061330	2061644	AluJb	-	J	b	0	0	12	0.34	0.54	7	0.17	0.57	2020	162	0	9	315	8	163	5.08	51.75	0.38
1470	0.9	7	0.93	7	0.95	5	1	7	0.71	6	1	4	7	0.903333	0.926667	0.0233333	0.513718	0.821445	1	2077071	2077366	AluJb	+	J	b	8	1	8	0.29	0.47	14	0.34	0.57	2024	132	0	17	296	7	160	4.73	54.05	0.33
1471	1	5	0.84	7	0.95	5	1	7	0.93	7	0.94	8	10	0.956667	0.93	-0.0266667	0.810564	0.962519	1	2081018	2081306	AluJo	+	J	o	7	1	10	0.26	0.56	24	0.64	0.55	1831	142	21	21	289	10	165	6.92	57.09	0.43
1474	1	3	1	3	0.92	4	0.62	3	0.92	3	0.95	3	4	0.83	0.973333	0.143333	0.0950913	0.500778	1	2083266	2083589	AluJb	-	J	b	0	0	8	0.24	0.51	10	0.41	0.44	1649	170	3	80	324	4	176	2.47	54.32	0.17
1478	0.67	4	0.93	3	0.89	3	1	4	1	4	0.94	3	4	0.98	0.83	-0.15	0.0360565	0.426804	1	2088844	2089144	AluSx1	-	S	x1	0	0	13	0.34	0.55	21	0.51	0.58	1975	143	40	7	301	4	154	2.66	51.16	0.21
1485	0.67	4	0.56	5	0.89	3	0.94	4	1	3	0.92	4	6	0.953333	0.706667	-0.246667	0.0371593	0.431169	1	2097582	2097864	AluJr	+	J	r	7	0.86	21	0.48	0.59	18	0.32	0.67	1957	145	0	0	283	6	156	4.24	55.12	0.28
1487	0.7	5	0.49	3	0.85	5	1	4	0.97	7	0.77	6	14	0.913333	0.68	-0.233333	0.0741336	0.500778	1	2102488	2102797	AluY	+	Y	None	17	1	14	0.38	0.55	20	0.54	0.54	2404	58	3	42	310	14	164	9.03	52.9	0.65
1491	1	3	0.69	6	0.95	4	1	3	0.67	5	0.75	4	11	0.806667	0.88	0.0733333	0.674713	0.907874	1	2118732	2119042	AluSx1	-	S	x1	0	0	13	0.53	0.45	16	0.39	0.58	2554	68	3	0	311	11	164	7.07	52.73	0.52
1495	1	3	1	5	0.96	3	0.75	6	0.89	3	1	3	6	0.88	0.986667	0.106667	0.195687	0.629385	1	2124075	2124338	AluJo	-	J	o	0	0	15	0.4	0.55	13	0.4	0.51	1732	136	57	4	264	6	157	4.55	59.47	0.26
1522	1	4	0.84	8	0.97	5	1	4	1	3	1	5	11	1	0.936667	-0.0633333	0.150153	0.565714	1	2153540	2153847	AluSp	-	S	p	0	0	6	0.27	0.43	17	0.51	0.52	2389	81	13	3	308	11	162	7.14	52.6	0.52
1529	0.75	7	0.93	5	0.65	5	1	5	0.96	6	0.7	4	8	0.886667	0.776667	-0.11	0.2501	0.69471	1	2157510	2157826	AluJb	-	J	b	0	0	21	0.53	0.57	18	0.36	0.63	1650	158	6	82	317	8	163	5.05	51.42	0.39
1534	0.95	5	0.82	5	0.93	5	0.98	6	0.87	6	0.97	4	6	0.94	0.9	-0.04	0.347556	0.723747	1	2173956	2174246	AluJo	-	J	o	0	0	15	0.38	0.57	16	0.54	0.49	1662	179	52	10	291	6	148	4.12	50.86	0.32
1542	1	3	0.96	4	1	4	1	4	0.78	4	0.94	4	7	0.906667	0.986667	0.08	0.253019	0.69829	1	2184252	2184550	AluSz6	+	S	z6	16	1	18	0.39	0.61	13	0.32	0.57	2071	141	0	3	299	7	154	4.68	51.51	0.36
1554	1	3	1	4	0.93	5	1	4	0.9	5	0.95	5	7	0.95	0.976667	0.0266667	0.481829	0.799704	1	2200376	2200685	AluJr	-	J	r	0	0	8	0.18	0.6	18	0.4	0.6	1771	177	26	29	310	7	170	4.52	54.84	0.3
1568	0.75	4	0.97	5	0.78	5	0.92	5	0.92	4	0.95	4	5	0.93	0.833333	-0.0966667	0.415315	0.756156	1	2256736	2257062	AluJr	-	J	r	0	0	11	0.28	0.59	11	0.29	0.55	1377	171	6	128	327	5	176	3.06	53.82	0.21
1572	1	4	1	4	0.89	5	1	4	1	3	0.96	4	5	0.986667	0.963333	-0.0233333	0.698985	0.91778	1	2274356	2274470	FLAM_C	-	FLAM_C	None	0	0	16	0.53	0.49	22	0.43	0.64	734	154	15	37	115	5	73	8.7	63.48	0.44
1575	1	3	1	3	0.88	8	0.8	5	0.94	4	0.95	7	9	0.896667	0.96	0.0633333	0.192296	0.625749	1	2285442	2285590	AluSz	+	S	z	0	0	9	0.25	0.54	17	0.4	0.58	1162	101	0	0	149	9	85	12.08	57.05	0.75
1595	0.62	4	0.87	5	0.95	5	1	6	0.9	5	0.96	6	9	0.953333	0.813333	-0.14	0.148227	0.563181	1	2317860	2318167	AluSx	-	S	x	0	0	13	0.34	0.56	13	0.3	0.59	2242	120	7	0	308	9	163	5.84	52.92	0.42
1622	0.8	5	1	5	1	8	0.93	5	1	3	0.67	6	10	0.866667	0.933333	0.0666667	0.540406	0.837778	1	2356453	2356622	AluSx	+	S	x	19	1	14	0.43	0.51	8	0.29	0.47	2128	103	0	23	170	10	93	11.76	54.71	0.79
1649	0	3	0	6	0	3	0.14	4	0	3	0	3	17	0.0466667	0	-0.0466667	0.328264	0.723448	1	2479972	2480279	AluY	+	Y	None	47	0.72	12	0.24	0.65	12	0.26	0.61	2312	84	19	10	308	17	169	11.04	54.87	0.74
1657	0.9	5	0.9	5	1	4	1	4	1	5	0.64	3	5	0.88	0.933333	0.0533333	0.85808	0.9795	1	2502198	2502495	AluJb	+	J	b	16	0.88	19	0.52	0.54	6	0.26	0.43	1820	134	27	27	298	5	170	3.36	57.05	0.21
1658	1	4	1	4	0.74	4	1	4	1	4	0.89	4	4	0.963333	0.913333	-0.05	0.79661	0.958561	1	2503039	2503165	FLAM_A	+	FLAM_A	None	19	0.63	6	0.25	0.43	4	0.14	0.48	608	236	8	0	127	4	71	6.3	55.91	0.4
1696	0.3	5	0.34	5	0.33	3	0.74	7	1	4	0.58	6	9	0.773333	0.323333	-0.45	0.0649462	0.500778	1	2580984	2581251	AluSg	-	S	g	0	0	4	0.11	0.54	0	0	0.56	1841	108	93	0	268	9	142	6.72	52.99	0.48
1734	0.78	3	0.5	3	0.17	3	0.67	3	0.92	3	0.61	3	3	0.733333	0.483333	-0.25	0.223057	0.662564	1	2859851	2860121	AluJo	-	J	o	0	0	23	0.53	0.59	4	0.13	0.5	1636	155	85	7	271	3	144	2.21	53.14	0.16
1759	0.75	4	0.94	4	0.31	4	0.71	4	0.79	3	0.69	4	7	0.73	0.666667	-0.0633333	0.992103	1	1	2973001	2973292	AluSq2	+	S	q2	9	1	3	0.12	0.45	3	0.1	0.49	2169	103	10	10	292	7	150	4.79	51.37	0.36
1776	0.78	6	0.4	4	0.55	5	0.69	7	0.83	6	0.94	6	11	0.82	0.576667	-0.243333	0.114916	0.519735	1	3066838	3067149	AluSz	+	S	z	28	0.75	13	0.31	0.58	14	0.34	0.58	2041	147	3	10	312	11	160	7.05	51.28	0.55
1790	0.47	3	0.43	5	0.58	4	0.83	6	1	5	0.92	5	9	0.916667	0.493333	-0.423333	0.0168328	0.336551	1	3124950	3125257	AluSg4	+	S	g4	29	0.9	23	0.5	0.61	4	0.11	0.53	2316	114	3	0	308	9	154	5.84	50	0.48
1819	0.94	4	0.79	4	0.62	4	0.88	4	1	4	0.85	4	4	0.91	0.783333	-0.126667	0.271629	0.718651	1	3260619	3260886	AluJr4	+	J	r4	14	0.79	9	0.34	0.47	0	0	0.36	1421	213	90	4	268	4	136	2.99	50.75	0.23
1825	0.88	4	0.61	9	0.29	7	0.94	4	0.67	7	0.86	7	13	0.823333	0.593333	-0.23	0.238328	0.680266	1	3283550	3283851	AluSq2	+	S	q2	13	1	15	0.59	0.45	13	0.43	0.49	2129	109	0	20	302	13	165	8.61	54.64	0.58
1841	0.74	4	0.42	4	0.62	4	0.61	3	0.83	4	0.77	4	4	0.736667	0.593333	-0.143333	0.275909	0.723333	1	3367586	3367709	AluJr	-	J	r	0	0	4	0.18	0.42	12	0.34	0.54	663	161	48	16	124	4	68	6.45	54.84	0.44
1872	1	3	0.83	3	0.92	3	1	4	0.88	4	0.67	3	8	0.85	0.916667	0.0666667	0.744487	0.938056	1	3403013	3403319	AluSz6	+	S	z6	23	0.87	12	0.62	0.39	5	0.29	0.37	1957	160	7	13	307	8	153	5.21	49.84	0.43
1875	1	4	0.55	6	0.59	5	0.9	5	1	5	0.8	6	6	0.9	0.713333	-0.186667	0.535586	0.834688	1	3429767	3430139	AluJo	-	J	o	0	0	10	0.29	0.52	8	0.26	0.5	1576	139	0	177	373	6	190	3.22	50.94	0.25
1876	0.67	3	0.42	4	0.44	3	0.7	3	0.94	4	0.78	3	4	0.806667	0.51	-0.296667	0.0595521	0.494221	1	3430142	3430454	AluJo	-	J	o	0	0	7	0.23	0.49	15	0.42	0.53	1960	147	10	19	313	4	152	2.56	48.56	0.22
1885	0.89	12	0.88	13	0.8	10	0.96	14	0.82	13	1	12	14	0.923333	0.856667	-0.0666667	0.191994	0.625667	1	3468985	3469278	AluJr	+	J	r	16	0.88	12	0.25	0.63	7	0.14	0.65	1915	139	10	14	294	14	163	9.52	55.44	0.62
1903	1	6	0.67	6	0.78	5	0.88	6	0.79	6	0.7	6	8	0.79	0.816667	0.0266667	0.507503	0.816529	1	3546014	3546289	AluSz	+	S	z	0	0	10	0.41	0.44	12	0.33	0.54	1751	149	11	14	276	8	158	5.8	57.25	0.36
1907	1	4	0.9	4	1	4	1	4	0.94	4	0.94	4	4	0.96	0.966667	0.00666667	0.661189	0.901197	1	3558671	3558795	FLAM_A	+	FLAM_A	None	9	0.89	12	0.61	0.4	10	0.33	0.5	694	216	0	0	125	4	67	6.4	53.6	0.46
1911	1	5	1	3	0.93	7	0.9	4	0.93	5	1	6	10	0.943333	0.976667	0.0333333	0.422273	0.761578	1	3571669	3571968	AluSx1	+	S	x1	18	0.78	15	0.39	0.56	10	0.53	0.39	2203	123	0	0	300	10	167	6.67	55.67	0.43
1939	0.63	6	0.22	6	0.32	5	0.65	6	0.68	6	0.59	6	6	0.64	0.39	-0.25	0.11699	0.520557	1	3621598	3621746	AluJr	-	J	r	0	0	14	0.27	0.65	14	0.3	0.62	864	174	7	7	149	6	82	8.05	55.03	0.53
1948	0.87	6	0.52	5	0.44	4	0.92	8	0.93	7	0.56	5	9	0.803333	0.61	-0.193333	0.257052	0.702724	1	3645266	3645579	AluJo	+	J	o	29	0.59	11	0.26	0.59	8	0.18	0.6	1719	150	29	70	314	9	177	5.73	56.37	0.38
1955	0.75	4	0.7	5	1	4	0.67	6	1	6	0.93	7	13	0.866667	0.816667	-0.05	0.768718	0.948264	1	3660748	3661021	AluY	+	Y	None	0	0	10	0.33	0.49	15	0.44	0.52	2175	73	18	0	274	13	164	9.49	59.85	0.53
1969	0.83	6	0.88	4	0.75	4	0.79	6	0.8	5	1	4	9	0.863333	0.82	-0.0433333	0.422127	0.761542	1	3674756	3675049	AluSc	-	S	c	0	0	11	0.36	0.49	8	0.26	0.49	2232	102	7	0	294	9	155	6.12	52.72	0.45
1976	0.77	5	0.45	5	0.7	5	0.83	3	0.64	5	0.53	5	5	0.666667	0.64	-0.0266667	0.826704	0.968901	1	3682422	3682729	AluJr	-	J	r	0	0	5	0.27	0.39	6	0.25	0.44	1866	195	13	3	308	5	157	3.25	50.97	0.26
1987	1	4	1	8	1	4	0.88	8	1	6	0.83	8	10	0.903333	1	0.0966667	0.0812864	0.500778	1	3698941	3699157	AluSp	-	S	p	0	0	13	0.4	0.51	5	0.15	0.51	1623	101	5	5	217	10	121	9.22	55.76	0.61
1997	1	3	0.62	4	0.25	4	0.54	4	0.69	4	0.93	3	12	0.72	0.623333	-0.0966667	0.931185	1	1	3710479	3710784	AluY	+	Y	None	26	0.69	8	0.28	0.48	10	0.33	0.49	2331	101	3	0	306	12	165	7.84	53.92	0.54
1998	1	5	1	5	1	3	0.87	3	1	7	0.67	6	9	0.846667	1	0.153333	0.0846292	0.500778	1	3710933	3711203	AluSz	-	S	z	0	0	15	0.47	0.5	17	0.65	0.46	1841	111	85	0	271	9	154	6.64	56.83	0.41
2001	1	4	1	6	1	6	0.97	7	1	6	1	8	12	0.99	1	0.01	0.455388	0.780407	1	3714089	3714398	AluSx	-	S	x	0	0	11	0.47	0.44	11	0.35	0.5	1937	126	16	55	310	12	163	7.74	52.58	0.58
2005	0.78	3	0.52	5	0.5	3	1	5	1	5	0.69	4	7	0.896667	0.6	-0.296667	0.0558333	0.48534	1	3715839	3716144	AluSx1	+	S	x1	30	1	5	0.22	0.42	6	0.17	0.53	2325	101	20	0	306	7	158	4.58	51.63	0.34
2016	1	4	1	5	1	4	0.86	7	0.83	6	0.8	5	15	0.83	1	0.17	0.000242873	0.102528	1	3729122	3729448	AluSx3	+	S	x3	27	0.85	1	0.14	0.24	6	0.42	0.34	2285	73	0	49	327	15	181	9.17	55.35	0.6
2018	1	5	1	6	0.86	7	0.85	5	0.55	7	0.91	4	10	0.77	0.953333	0.183333	0.0736082	0.500778	1	3730135	3730431	AluSx3	+	S	x3	18	0.67	13	0.53	0.45	5	0.18	0.47	2072	121	0	0	297	10	161	6.73	54.21	0.46
2025	0.67	3	0.56	3	0.75	4	1	3	0.8	5	0.33	3	7	0.71	0.66	-0.05	0.468849	0.789982	1	3749256	3749544	AluJb	-	J	b	0	0	14	0.6	0.45	10	0.4	0.45	1837	152	14	0	289	7	158	4.84	54.67	0.33
2038	1	4	0.67	4	0.71	4	0.88	4	0.96	4	1	4	6	0.946667	0.793333	-0.153333	0.40143	0.750069	1	3759352	3759651	AluSz	-	S	z	0	0	14	0.49	0.48	9	0.33	0.47	1984	140	0	0	300	6	159	4	53	0.29
2047	1	4	0.81	4	1	3	1	3	0.33	3	1	3	16	0.776667	0.936667	0.16	0.703772	0.919496	1	3764815	3765111	AluY	+	Y	None	16	1	7	0.35	0.4	5	0.26	0.4	2412	57	0	0	297	16	166	10.77	55.89	0.7
2053	0.93	6	0.9	6	0.81	5	1	6	0.86	5	1	5	6	0.953333	0.88	-0.0733333	0.135883	0.548068	1	3771739	3772031	AluJr4	-	J	r4	0	0	12	0.33	0.54	5	0.2	0.45	1681	147	55	20	293	6	139	4.1	47.44	0.36
2054	0.33	5	0.6	5	0.8	5	0.28	8	0.62	10	0.39	3	16	0.43	0.576667	0.146667	0.394318	0.745361	1	3772697	3772946	AluSz	+	S	z	3	1	5	0.21	0.44	43	0.97	0.6	1871	44	116	0	250	16	144	12.8	57.6	0.78
2057	1	3	0.87	3	0.97	3	1	3	1	5	0.93	5	5	0.976667	0.946667	-0.03	0.55001	0.843327	1	3776798	3777092	AluJb	-	J	b	0	0	5	0.16	0.51	9	0.32	0.48	1651	176	34	7	295	5	144	3.39	48.81	0.29
2059	1	3	1	4	0.75	4	1	5	1	3	1	3	6	1	0.916667	-0.0833333	0.315609	0.723448	1	3777982	3778291	AluJb	-	J	b	0	0	9	0.36	0.45	3	0.2	0.35	2183	142	3	0	310	6	163	3.87	52.58	0.28
2068	0.94	4	0.96	4	1	4	1	4	0.96	4	1	5	9	0.986667	0.966667	-0.02	0.423967	0.762567	1	3787850	3788153	AluSx1	-	S	x1	0	0	11	0.27	0.58	13	0.34	0.55	2351	79	7	10	304	9	164	5.92	53.95	0.41
2069	1	4	0.94	4	0.88	8	0.96	5	1	4	0.95	7	19	0.97	0.94	-0.03	0.61621	0.878244	1	3788696	3788995	AluSc	+	S	c	20	0.85	14	0.37	0.55	8	0.18	0.61	2441	63	0	3	300	19	173	12.67	57.67	0.77
2091	1	3	0.88	7	0.93	5	0.83	6	0.93	7	1	11	20	0.92	0.936667	0.0166667	0.90372	0.993648	1	3818444	3818748	AluY	-	Y	None	0	0	22	0.52	0.58	9	0.3	0.49	2469	66	3	3	305	20	170	13.11	55.74	0.85
2094	1	5	0.97	6	0.8	5	1	5	0.83	3	1	5	11	0.943333	0.923333	-0.02	0.733573	0.93309	1	3830419	3830705	AluSz	-	S	z	0	0	8	0.24	0.51	17	0.41	0.58	2056	112	35	3	287	11	157	7.67	54.7	0.52
2119	0.69	4	0.91	8	0.63	5	0.92	6	0.74	6	0.85	5	10	0.836667	0.743333	-0.0933333	0.470183	0.790812	1	4019336	4019643	AluSx	-	S	x	0	0	8	0.28	0.48	8	0.25	0.5	2096	107	0	45	308	10	174	6.49	56.49	0.42
2147	1	3	0.88	4	0.8	5	1	3	0.9	5	1	5	9	0.966667	0.893333	-0.0733333	0.359871	0.727117	1	4059173	4059456	AluSx	-	S	x	0	0	9	0.36	0.47	23	0.44	0.67	2028	137	11	0	284	9	154	6.34	54.23	0.43
2150	0.94	3	0.3	5	0.33	3	0.53	3	0.67	4	0.33	3	5	0.51	0.523333	0.0133333	0.760945	0.945569	1	4063732	4063994	AluSz6	+	S	z6	15	1	5	0.18	0.48	16	0.39	0.58	1825	137	0	8	263	5	132	3.8	50.19	0.3
2158	0.6	5	0.5	5	0.75	5	1	4	0.75	4	0.58	4	5	0.776667	0.616667	-0.16	0.263996	0.710515	1	4072346	4072634	AluJb	+	J	b	28	0.75	7	0.35	0.4	3	0.19	0.35	1574	138	69	42	289	5	151	3.46	52.25	0.25
2250	0.76	6	1	4	1	5	1	6	0.95	7	1	5	11	0.983333	0.92	-0.0633333	0.621621	0.880738	1	4292445	4292752	AluY	+	Y	None	25	0.92	4	0.21	0.4	8	0.37	0.42	2379	94	0	7	308	11	163	7.14	52.92	0.52
2283	1	3	0.77	4	0.67	3	1	4	1	3	1	3	10	1	0.813333	-0.186667	0.0742909	0.500778	1	4386086	4386380	AluSx	-	S	x	0	0	7	0.27	0.46	3	0.09	0.52	2329	98	0	3	295	10	160	6.78	54.24	0.46
2319	0.71	4	0.69	4	0.33	6	0.86	4	0.93	4	0.7	4	6	0.83	0.576667	-0.253333	0.0956252	0.500778	1	4494802	4495093	AluSz	-	S	z	0	0	12	0.38	0.5	9	0.35	0.46	2075	140	3	0	292	6	153	4.11	52.4	0.3
2328	0.8	5	0.63	3	1	3	1	5	0.75	4	0.88	4	7	0.876667	0.81	-0.0666667	0.794809	0.957911	1	4516794	4517087	AluSc	-	S	c	0	0	8	0.29	0.48	4	0.13	0.49	2163	122	3	0	294	7	153	4.76	52.04	0.36
2348	0.66	4	0.28	5	0.38	6	0.93	5	0.93	5	0.62	6	7	0.826667	0.44	-0.386667	0.0403367	0.439647	1	4559068	4559339	AluSz	-	S	z	0	0	4	0.18	0.42	4	0.16	0.46	1943	110	0	22	272	7	134	5.15	49.26	0.43
2349	0.17	3	1	4	0.69	4	0.93	3	0.89	3	1	3	20	0.94	0.62	-0.32	0.332089	0.723448	1	4560091	4560400	AluYb8	-	Y	b8	0	0	6	0.21	0.48	13	0.34	0.55	2886	13	0	0	310	20	176	12.9	56.77	0.81
2430	1	4	0.72	4	0.58	4	0.92	4	1	4	0.92	4	7	0.946667	0.766667	-0.18	0.406598	0.750069	1	4775464	4775759	AluSp	+	S	p	15	0.93	2	0.06	0.5	4	0.19	0.42	2162	118	10	3	296	7	147	4.73	49.66	0.39
2441	1	5	0.5	4	0.3	5	1	4	0.5	4	0.83	6	6	0.776667	0.6	-0.176667	0.683481	0.910599	1	4797672	4797986	AluJo	+	J	o	25	0.76	13	0.29	0.6	4	0.13	0.49	1902	156	3	29	315	6	154	3.81	48.89	0.32
2457	0.39	3	0.59	4	0.53	4	0.6	5	0.71	4	0.85	5	5	0.72	0.503333	-0.216667	0.105933	0.507254	1	4853899	4854191	AluJr	-	J	r	0	0	4	0.12	0.53	5	0.14	0.53	1811	171	7	3	293	5	151	3.41	51.54	0.26
2498	1	3	0.33	3	0.5	3	0.93	3	0.96	4	1	5	6	0.963333	0.61	-0.353333	0.218545	0.657858	1	4993713	4994037	AluSx1	+	S	x1	0	0	3	0.11	0.46	8	0.29	0.47	2030	96	3	57	325	6	171	3.69	52.62	0.27
2502	1	3	0.83	3	0.75	3	0.67	3	1	4	1	4	4	0.89	0.86	-0.03	0.582007	0.860866	1	4998035	4998144	AluSp	-	S	p	0	0	4	0.17	0.43	7	0.24	0.49	747	82	0	45	110	4	53	7.27	48.18	0.64
2573	0.67	3	0.31	4	0.63	5	0.5	3	0.67	5	0.75	4	6	0.64	0.536667	-0.103333	0.477013	0.796119	1	5191483	5191743	AluSx	+	S	x	15	0.87	14	0.43	0.51	1	0.06	0.38	1547	142	142	4	261	6	133	4.6	50.96	0.35
2602	0.7	5	0.7	8	0.7	7	0.65	6	1	4	0.77	8	13	0.806667	0.7	-0.106667	0.2942	0.723448	1	5287683	5288004	AluSg	-	S	g	0	0	8	0.41	0.4	3	0.24	0.32	1886	124	26	4	322	13	153	8.07	47.52	0.72
2609	0.75	4	1	5	0.71	7	0.67	6	0.75	8	1	3	14	0.806667	0.82	0.0133333	0.968628	1	1	5311737	5312024	AluY	+	Y	None	4	1	6	0.25	0.45	2	0.13	0.35	2284	69	0	10	288	14	168	9.72	58.33	0.58
2623	1	3	0.45	5	0.25	4	0.68	5	0.94	4	0.5	3	9	0.706667	0.566667	-0.14	0.968793	1	1	5339906	5340214	AluSx	-	S	x	0	0	9	0.28	0.51	2	0.07	0.48	2185	129	10	0	309	9	164	5.83	53.07	0.42
2643	0.92	4	1	4	1	5	1	3	0.89	3	1	3	7	0.963333	0.973333	0.01	0.911108	0.994988	1	5376880	5377186	AluSx1	+	S	x1	23	0.87	7	0.33	0.41	3	0.17	0.37	2152	124	3	23	307	7	160	4.56	52.12	0.34
2654	1	3	0.61	5	0.39	6	0.95	5	1	3	0.7	4	8	0.883333	0.666667	-0.216667	0.477929	0.79674	1	5397074	5397363	AluJb	+	J	b	8	1	5	0.2	0.44	5	0.17	0.48	1931	145	14	14	290	8	155	5.52	53.45	0.4
2664	0.57	4	0.53	4	0.76	4	0.79	4	0.96	4	0.91	4	7	0.886667	0.62	-0.266667	0.0357629	0.42551	1	5408546	5408819	AluSg	-	S	g	0	0	6	0.24	0.46	12	0.36	0.53	2147	95	4	4	274	7	151	5.11	55.11	0.34
2692	0.94	8	0.86	6	0.56	8	0.88	8	0.93	6	0.93	7	10	0.913333	0.786667	-0.126667	0.328621	0.723448	1	5486445	5486780	AluSx	-	S	x	0	0	1	0.05	0.39	11	0.41	0.47	1923	125	0	77	336	10	168	5.95	50	0.48
2819	1	4	1	3	0.64	4	0.92	3	1	5	0.89	3	7	0.936667	0.88	-0.0566667	0.882585	0.987292	1	5796740	5797004	AluSx3	-	S	x3	0	0	0	0	0.37	5	0.66	0.42	1517	140	155	30	265	7	135	5.28	50.94	0.41
2849	0.75	4	0.76	5	0.4	5	0.8	5	0.8	5	0.8	5	9	0.8	0.636667	-0.163333	0.21699	0.656059	1	5848363	5848659	AluSq	+	S	q	20	0.9	2	0.07	0.47	1	0.04	0.46	2103	118	0	0	297	9	150	6.06	50.51	0.48
2858	0.5	5	0.25	4	0.06	4	0.58	6	0.67	3	0.68	6	14	0.643333	0.27	-0.373333	0.0553602	0.48431	1	5874929	5875228	AluY	-	Y	None	0	0	14	0.37	0.55	3	0.11	0.47	2395	67	0	0	300	14	162	9.33	54	0.65
2888	0.8	5	1	5	0.6	5	1	5	1	4	0.86	7	10	0.953333	0.8	-0.153333	0.313473	0.723448	1	5980011	5980290	AluSc8	-	S	c8	0	0	5	0.18	0.47	15	0.45	0.52	2043	89	7	4	280	10	155	7.14	55.36	0.47
2892	1	5	0.8	5	0.92	4	1	4	0.45	5	0.97	4	5	0.806667	0.906667	0.1	0.907835	0.994988	1	5982913	5983078	FRAM	+	FRAM	None	21	0.81	9	0.32	0.48	10	0.35	0.48	902	193	12	0	166	5	86	6.02	51.81	0.46
2893	0.92	4	0.59	6	1	5	1	5	1	5	1	3	6	1	0.836667	-0.163333	0.106271	0.507997	1	5984712	5985015	AluJb	-	J	b	0	0	4	0.19	0.41	4	0.26	0.35	1879	161	0	3	304	6	152	3.95	50	0.32
2896	1	3	1	3	1	3	1	3	1	3	1	3	3	1	1	0	1	1	1	5991858	5992145	AluJo	+	J	o	13	1	4	0.2	0.4	6	0.24	0.45	1724	174	7	0	288	3	141	2.08	48.96	0.17
2899	0.6	8	0.76	11	0.8	11	0.93	8	1	10	0.95	9	13	0.96	0.72	-0.24	0.0144987	0.322526	1	6004748	6005041	AluSz	+	S	z	20	0.7	18	0.46	0.57	10	0.32	0.52	2080	126	31	0	294	13	165	8.84	56.12	0.58
2914	0.96	7	0.97	6	1	7	0.96	6	0.82	7	0.88	7	9	0.886667	0.976667	0.09	0.0638534	0.500778	1	6028381	6028675	AluSz6	+	S	z6	14	0.93	13	0.48	0.48	11	0.38	0.48	1938	163	3	0	295	9	159	6.1	53.9	0.42
2932	0.73	5	0.85	7	0.9	7	0.79	7	0.69	8	1	6	13	0.826667	0.826667	0	0.61258	0.877278	1	6068400	6068697	AluSx	+	S	x	15	1	10	0.22	0.6	7	0.16	0.59	2257	87	10	17	298	13	159	8.72	53.36	0.61
2944	1	4	1	4	1	3	1	4	1	4	1	4	4	1	1	0	1	1	1	6078529	6078687	AluJb	-	J	b	0	0	5	0.18	0.48	4	0.15	0.47	1031	126	0	31	159	4	88	5.03	55.35	0.33
2954	1	5	0.63	5	1	5	0.88	4	0.33	6	1	5	7	0.736667	0.876667	0.14	0.502625	0.813365	1	6089094	6089363	AluSc8	+	S	c8	22	0.95	14	0.38	0.55	6	0.15	0.57	2026	104	4	7	270	7	138	5.19	51.11	0.4
2968	0.96	4	0.95	5	0.92	4	0.88	5	0.91	4	0.8	5	6	0.863333	0.943333	0.08	0.0820372	0.500778	1	6113860	6114132	AluJo	+	J	o	30	0.83	11	0.28	0.56	13	0.42	0.51	1599	169	143	0	273	6	140	4.4	51.28	0.33
2975	1	4	1	3	1	4	1	4	1	3	1	3	8	1	1	0	1	1	1	6120680	6120982	AluSc	+	S	c	21	1	9	0.21	0.59	18	0.39	0.61	2395	86	0	10	303	8	158	5.28	52.15	0.39
2977	1	6	0.83	4	0.8	5	0.83	6	0.81	6	1	5	11	0.88	0.876667	-0.00333333	0.987514	1	1	6123091	6123375	AluSx3	-	S	x3	0	0	8	0.27	0.49	5	0.19	0.47	2095	98	32	14	285	11	147	7.72	51.58	0.59
2998	0.55	5	0.27	8	0.33	7	0.5	6	0.76	7	0.53	8	8	0.596667	0.383333	-0.213333	0.151246	0.567707	1	6173203	6173492	AluJb	+	J	b	9	1	9	0.2	0.6	8	0.2	0.57	1865	159	7	3	290	8	157	5.52	54.14	0.38
3019	0.97	5	0.7	5	0.64	5	0.81	6	1	5	0.8	5	7	0.87	0.77	-0.1	0.527737	0.830179	1	6197183	6197466	AluJb	-	J	b	0	0	14	0.31	0.61	4	0.13	0.49	1851	151	3	7	284	7	155	4.93	54.58	0.35
3028	1	8	0.9	5	0.88	5	0.76	4	0.8	5	1	5	11	0.853333	0.926667	0.0733333	0.673981	0.907458	1	6201062	6201349	AluSx	+	S	x	5	1	4	0.15	0.46	10	0.37	0.46	1992	122	7	10	288	11	160	7.64	55.56	0.5
3029	0.83	7	0.92	4	0.5	6	1	5	0.71	7	0.67	6	7	0.793333	0.75	-0.0433333	0.597592	0.868765	1	6201394	6201662	AluSz	+	S	z	0	0	13	0.49	0.46	12	0.36	0.52	1799	138	7	4	269	7	155	5.2	57.62	0.31
3030	0.97	5	0.54	5	0.75	4	0.95	4	0.75	4	0.84	5	5	0.846667	0.753333	-0.0933333	0.764886	0.947272	1	6203117	6203392	AluJo	-	J	o	0	0	10	0.28	0.55	5	0.12	0.59	1829	130	87	0	276	5	150	3.62	54.35	0.25
3043	1	3	1	3	1	3	1	3	0.33	3	1	3	22	0.776667	1	0.223333	0.302649	0.723448	1	6218786	6219090	AluYa5	+	Y	a5	24	0.92	11	0.33	0.52	10	0.32	0.51	2803	16	0	0	305	22	175	14.43	57.38	0.88
3054	1	3	1	3	1	3	1	3	1	3	1	3	16	1	1	0	1	1	1	6233162	6233463	AluY	-	Y	None	0	0	13	0.27	0.62	8	0.18	0.59	2601	50	0	0	302	16	169	10.6	55.96	0.7
3064	0.94	9	0.78	9	0.79	7	1	8	1	8	1	6	14	1	0.836667	-0.163333	0.00257607	0.178857	1	6248853	6249144	AluSp	-	S	p	0	0	6	0.22	0.47	3	0.13	0.43	2349	51	20	7	292	14	161	9.59	55.14	0.64
3084	1	9	0.83	9	1	10	1	10	0.98	9	0.97	9	14	0.983333	0.943333	-0.04	0.697507	0.917258	1	6257090	6257388	AluSx3	-	S	x3	0	0	3	0.14	0.42	3	0.15	0.41	2233	110	0	3	299	14	159	9.36	53.18	0.67
3089	1	5	1	5	0.9	5	0.8	5	0.97	4	0.9	5	5	0.89	0.966667	0.0766667	0.174854	0.602395	1	6262655	6262808	AluSx	-	S	x	0	0	6	0.18	0.52	14	0.46	0.49	1518	112	117	76	154	5	71	6.49	46.1	0.64
3096	0.56	4	0.2	5	0.48	4	0.53	4	0.46	4	0.26	5	8	0.416667	0.413333	-0.00333333	0.94323	1	1	6264617	6264885	AluSx	+	S	x	19	0.79	12	0.41	0.49	21	0.55	0.55	1672	141	123	4	269	8	139	5.95	51.67	0.46
3114	0.83	6	0.75	4	1	8	0.8	5	1	5	0.9	5	13	0.9	0.86	-0.04	0.825313	0.968528	1	6283159	6283466	AluSx3	-	S	x3	0	0	13	0.35	0.54	13	0.5	0.46	2333	107	0	0	308	13	165	8.44	53.57	0.59
3116	0.95	4	1	4	1	4	0.95	4	0.95	4	0.9	4	4	0.933333	0.983333	0.05	0.0762418	0.500778	1	6285923	6286144	AluJb	-	J	b	0	0	9	0.24	0.58	7	0.22	0.51	1498	158	22	0	222	4	113	3.6	50.9	0.28
3126	1	4	0.95	4	1	4	0.75	4	1	4	1	4	9	0.916667	0.983333	0.0666667	0.615418	0.877904	1	6288805	6289118	AluSx	+	S	x	26	0.88	12	0.38	0.5	13	0.42	0.5	2249	112	0	19	314	9	161	5.73	51.27	0.44
3139	1	4	1	7	1	5	1	4	0.97	5	0.93	5	16	0.966667	1	0.0333333	0.138751	0.551932	1	6292920	6293213	AluSg	-	S	g	0	0	10	0.32	0.5	7	0.31	0.43	2403	65	7	3	294	16	166	10.88	56.46	0.69
3143	0.13	9	0.14	7	0.18	12	0.33	6	0	8	0.14	7	16	0.156667	0.15	-0.00666667	0.574088	0.8565	1	6296329	6296621	AluSz	+	S	z	11	1	67	0.99	0.73	40	0.89	0.6	2301	82	0	3	293	16	161	10.92	54.95	0.73
3174	0.97	5	0.87	5	1	6	1	5	0.93	5	0.76	5	6	0.896667	0.946667	0.05	0.650175	0.8957	1	6343231	6343523	AluSz6	-	S	z6	0	0	12	0.32	0.55	8	0.32	0.45	1866	160	7	14	293	6	148	4.1	50.51	0.32
3181	1	4	1	4	0.88	4	1	4	0.97	4	1	4	4	0.99	0.96	-0.03	0.595286	0.867462	1	6349462	6349733	AluJb	-	J	b	0	0	20	0.53	0.55	8	0.24	0.52	1619	136	107	18	272	4	139	2.94	51.1	0.23
3185	1	3	1	4	1	3	1	4	0.94	4	0.88	4	4	0.94	1	0.06	0.0981212	0.501285	1	6353573	6353773	AluJb	+	J	b	11	0.91	15	0.49	0.5	11	0.26	0.58	1072	214	0	35	201	4	97	3.98	48.26	0.37
3194	1	3	1	3	1	3	1	3	0.94	3	1	3	5	0.98	1	0.02	0.367384	0.72739	1	6372518	6372827	AluSx1	-	S	x1	0	0	10	0.33	0.5	6	0.21	0.47	2197	132	0	13	310	5	164	3.23	52.9	0.24
3206	1	4	1	4	1	5	0.67	3	0.75	4	0.86	7	13	0.76	1	0.24	0.000385419	0.110547	1	6387824	6388131	AluSc	-	S	c	0	0	14	0.45	0.5	7	0.24	0.48	2372	97	3	0	308	13	168	8.44	54.55	0.57
3208	1	3	0.75	4	0.92	4	0.67	3	1	3	1	3	13	0.89	0.89	0	0.701375	0.91889	1	6392595	6392930	AluY	+	Y	None	50	0.84	14	0.4	0.53	13	0.32	0.57	2501	70	0	19	336	13	168	7.74	50	0.63
3212	1	3	1	3	0.94	4	1	4	1	4	0.79	3	5	0.93	0.98	0.05	0.688641	0.913049	1	6395413	6395568	AluJb	+	J	b	16	0.88	14	0.41	0.52	6	0.18	0.52	1809	132	30	43	156	5	82	6.41	52.56	0.47
3213	0.97	6	0.96	6	0.94	4	1	6	0.92	6	1	8	13	0.973333	0.956667	-0.0166667	0.348786	0.723747	1	6396125	6396418	AluSc8	+	S	c8	25	1	7	0.22	0.5	12	0.31	0.55	2199	88	44	3	294	13	151	8.84	51.36	0.67
3218	1	3	0.92	6	0.92	6	1	3	0.7	5	1	6	17	0.9	0.946667	0.0466667	0.889804	0.989146	1	6400009	6400325	AluY	-	Y	None	0	0	24	0.56	0.59	11	0.48	0.43	2434	52	0	3	317	17	174	10.73	54.89	0.72
3219	0.86	7	1	5	1	7	1	10	1	4	0.92	6	12	0.973333	0.953333	-0.02	0.850836	0.977197	1	6400814	6401117	AluSz	+	S	z	22	0.77	11	0.48	0.43	14	0.47	0.49	2225	122	0	0	304	12	163	7.89	53.62	0.55
3238	0.25	4	0.25	5	0.75	4	0.71	6	0.85	4	0.6	5	8	0.72	0.416667	-0.303333	0.135398	0.547052	1	6421577	6421882	AluSx	+	S	x	21	0.81	10	0.43	0.44	8	0.24	0.51	1816	154	20	29	306	8	166	5.23	54.25	0.36
3263	1	3	0.75	12	0.97	6	0.97	7	1	6	1	7	17	0.99	0.906667	-0.0833333	0.291788	0.723448	1	6435056	6435343	AluY	+	Y	None	22	0.91	9	0.25	0.54	15	0.51	0.49	2395	38	52	0	288	17	164	11.81	56.94	0.74
3271	1	3	0.96	3	1	3	0.92	3	1	3	1	3	5	0.973333	0.986667	0.0133333	0.773312	0.948588	1	6436810	6436940	AluY	+	Y	None	19	0.89	11	0.36	0.5	7	0.31	0.43	815	84	252	0	131	5	70	7.63	53.44	0.59
3280	0.93	5	0.94	5	0.67	4	0.8	5	0.75	6	0.93	3	6	0.826667	0.846667	0.02	0.686465	0.912161	1	6442591	6442885	AluJb	+	J	b	21	0.76	26	0.74	0.54	12	0.38	0.51	1637	166	37	24	295	6	154	4.07	52.2	0.3
3287	0.8	5	0.75	4	0.44	5	0.98	5	0.95	5	0.92	5	6	0.95	0.663333	-0.286667	0.0138867	0.318145	1	6446638	6446952	AluJb	+	J	b	29	0.76	11	0.28	0.56	11	0.51	0.41	1764	191	0	25	315	6	158	3.81	50.16	0.3
3309	0.84	4	0.75	4	1	3	0.77	4	0.86	4	0.71	4	4	0.78	0.863333	0.0833333	0.307151	0.723448	1	6460366	6460588	AluJb	-	J	b	0	0	19	0.56	0.52	20	0.58	0.52	1282	188	31	5	223	4	126	3.59	56.5	0.23
3311	0.89	6	0.76	5	1	5	0.79	6	0.71	7	0.72	6	9	0.74	0.883333	0.143333	0.157368	0.57786	1	6460972	6461229	AluSg	+	S	g	30	0.87	15	0.42	0.53	10	0.46	0.42	1136	171	202	0	258	9	131	6.98	50.78	0.54
3319	0.75	4	0.57	3	0.93	3	0.76	4	0.5	3	1	4	22	0.753333	0.75	-0.00333333	0.679298	0.909407	1	6464486	6464818	AluY	+	Y	None	51	0.76	9	0.33	0.47	23	0.66	0.53	2480	21	0	3	333	22	175	13.21	52.55	0.97
3342	0.57	5	0.61	3	0	3	0.78	3	0.75	4	0.62	4	11	0.716667	0.393333	-0.323333	0.183875	0.615628	1	6475837	6476137	AluSx1	-	S	x1	0	0	13	0.43	0.49	8	0.19	0.58	2294	106	3	0	301	11	166	7.31	55.15	0.48
3392	1	4	1	3	1	5	0.93	3	1	7	0.42	6	10	0.783333	1	0.216667	0.123974	0.529407	1	6526576	6526872	AluSz	+	S	z	18	0.89	47	0.76	0.71	7	0.16	0.6	2137	135	0	0	297	10	155	6.73	52.19	0.5
3396	0.92	4	0	5	0.62	3	0.28	5	1	4	0.27	4	5	0.516667	0.513333	-0.00333333	0.576533	0.857856	1	6536809	6536997	AluJb	-	J	b	1	1	3	0.09	0.53	7	0.18	0.55	1273	153	5	0	189	5	95	5.29	50.26	0.42
3398	0.4	5	0.8	6	0.72	6	0.83	6	0.93	5	1	6	7	0.92	0.64	-0.28	0.0575424	0.489604	1	6538250	6538528	AluJb	-	J	b	0	0	18	0.51	0.55	14	0.55	0.46	1831	136	93	0	279	7	148	5.02	53.05	0.36
3409	0.19	4	0.32	5	0.58	6	0.96	4	0.33	3	0.8	5	8	0.696667	0.363333	-0.333333	0.141349	0.554313	1	6542752	6543066	AluSx	-	S	x	0	0	9	0.29	0.5	9	0.23	0.56	2057	133	0	0	315	8	159	5.08	50.48	0.4
3457	0.9	5	1	3	0.75	4	1	3	1	6	1	3	10	1	0.883333	-0.116667	0.0881972	0.500778	1	6582124	6582297	AluSx3	+	S	x3	0	0	5	0.19	0.46	15	0.49	0.49	1311	92	6	11	174	10	94	11.49	54.02	0.79
3458	1	5	0.75	4	1	3	1	4	1	3	1	4	8	1	0.916667	-0.0833333	0.315609	0.723448	1	6582330	6582635	AluSx1	+	S	x1	30	0.83	12	0.46	0.46	18	0.54	0.52	2180	128	13	0	306	8	157	5.23	51.31	0.4
3465	0.77	5	1	4	1	5	1	4	1	4	0.79	4	8	0.93	0.923333	-0.00666667	0.978647	1	1	6587427	6587660	AluSx	+	S	x	0	0	15	0.5	0.49	9	0.34	0.46	1624	128	8	0	234	8	129	6.84	55.13	0.45
3488	0.89	3	0.96	5	1	5	0.96	5	0.92	5	0.87	5	9	0.916667	0.95	0.0333333	0.35637	0.724797	1	6598451	6598750	AluSx1	+	S	x1	30	0.77	4	0.29	0.33	8	0.31	0.46	2187	110	40	0	300	9	155	6	51.67	0.45
3505	1	4	1	4	1	4	1	3	1	4	1	4	4	1	1	0	1	1	1	6604194	6604355	AluJb	+	J	b	13	1	10	0.33	0.49	7	0.23	0.5	1424	200	0	58	162	4	88	4.94	54.32	0.34
3508	0.83	6	0.9	5	0.85	5	0.9	5	0.92	5	1	5	6	0.94	0.86	-0.08	0.15543	0.574789	1	6607639	6607926	AluJb	+	J	b	16	0.88	3	0.12	0.46	13	0.46	0.48	1679	174	38	3	288	6	150	4.17	52.08	0.31
3509	0.83	6	0.88	6	0.88	8	0.86	7	0.75	5	0.75	4	8	0.786667	0.863333	0.0766667	0.257572	0.703228	1	6608196	6608506	AluSz	-	S	z	0	0	13	0.43	0.49	7	0.37	0.39	2240	103	6	10	311	8	159	5.14	51.13	0.4
3517	0.92	3	1	5	1	4	0.9	4	0.86	3	0.95	4	5	0.903333	0.973333	0.07	0.0899944	0.500778	1	6611358	6611656	AluSx	+	S	x	2	1	9	0.29	0.5	15	0.57	0.46	1471	144	42	104	299	5	167	3.34	55.85	0.21
3521	0.95	4	0.4	4	1	5	0.67	3	0.67	4	0.33	3	6	0.556667	0.783333	0.226667	0.173253	0.600234	1	6612648	6612828	AluSx	-	S	x	0	0	8	0.32	0.45	12	0.38	0.51	958	182	166	0	181	6	107	6.63	59.12	0.39
3522	0.84	5	0.5	4	0.71	7	0.56	7	0.86	7	0.67	3	10	0.696667	0.683333	-0.0133333	0.919564	0.997204	1	6612830	6613171	AluSx	-	S	x	0	0	11	0.38	0.49	8	0.31	0.46	2317	116	0	0	342	10	183	5.85	53.51	0.42
3533	0.8	5	0.6	5	0.46	5	1	4	0.8	5	0.75	4	7	0.85	0.62	-0.23	0.151667	0.568329	1	6618498	6618786	AluSx1	+	S	x1	9	1	3	0.13	0.43	22	0.62	0.54	1976	118	21	17	289	7	156	4.84	53.98	0.34
3538	0.75	8	0.67	7	0.75	4	0.63	9	0.83	8	0.75	10	10	0.736667	0.723333	-0.0133333	0.822421	0.968301	1	6619746	6620077	AluSq2	+	S	q2	19	1	10	0.32	0.5	10	0.28	0.54	1980	108	3	93	332	10	174	6.02	52.41	0.44
3541	0.94	6	0.89	9	0.97	8	1	8	0.96	8	1	9	10	0.986667	0.933333	-0.0533333	0.0800483	0.500778	1	6621490	6621789	AluY	+	Y	None	15	1	10	0.36	0.48	5	0.18	0.49	2196	107	0	13	300	10	164	6.67	54.67	0.45
3549	1	4	0.73	6	0.96	4	0.8	5	0.79	4	0.81	4	9	0.8	0.896667	0.0966667	0.165741	0.588917	1	6633239	6633533	AluSx1	+	S	x1	17	0.82	6	0.18	0.55	25	0.76	0.51	2274	102	7	0	295	9	165	6.1	55.93	0.39
3570	0.83	8	0.6	5	0.94	8	0.44	3	0.89	9	0.79	7	11	0.706667	0.79	0.0833333	0.581664	0.860781	1	6656178	6656518	AluSx	+	S	x	24	0.83	0	0	0.55	7	0.2	0.52	1947	111	3	106	341	11	182	6.45	53.37	0.47
3576	0.75	4	1	7	0.95	10	0.96	6	0.88	8	0.8	5	11	0.88	0.9	0.02	0.529278	0.830863	1	6664801	6665020	AluSq2	+	S	q2	0	0	7	0.33	0.41	4	0.2	0.4	1365	114	9	45	220	11	125	10	56.82	0.63
3582	0.83	3	0.78	3	0.88	5	0.73	3	0.67	3	0.85	4	6	0.75	0.83	0.08	0.354364	0.724797	1	6666534	6666743	AluSx	+	S	x	18	0.94	6	0.19	0.51	9	0.4	0.43	1491	133	24	0	210	6	100	5.71	47.62	0.5
3597	1	3	1	3	1	4	1	5	1	4	0.83	3	11	0.943333	1	0.0566667	0.323295	0.723448	1	6671491	6671783	AluSc	+	S	c	14	0.93	11	0.36	0.49	9	0.47	0.39	2266	89	3	0	293	11	163	7.51	55.63	0.5
3599	0.62	7	0.37	7	0.9	5	0.35	6	0.67	3	0.2	5	20	0.406667	0.63	0.223333	0.264269	0.71054	1	6672214	6672510	AluSg	-	S	g	0	0	7	0.36	0.39	25	0.93	0.48	2532	54	0	0	297	20	168	13.47	56.57	0.85
3600	0.8	5	1	3	0.7	9	0.65	10	0.54	4	0.84	5	20	0.676667	0.833333	0.156667	0.245407	0.688998	1	6676086	6676385	AluSg	-	S	g	0	0	20	0.51	0.56	6	0.3	0.4	2457	60	3	3	300	20	165	13.33	55	0.88
3601	0.92	8	1	8	0.67	6	0.85	8	1	6	0.73	6	10	0.86	0.863333	0.00333333	0.92309	0.998444	1	6677168	6677437	AluSx	-	S	x	0	0	8	0.32	0.45	13	0.47	0.47	1808	130	63	0	270	10	142	7.41	52.59	0.54
3602	0.4	5	1	9	0.62	8	1	7	0.96	8	1	4	12	0.986667	0.673333	-0.313333	0.12652	0.532897	1	6677497	6677787	AluSx3	-	S	x3	0	0	11	0.41	0.47	7	0.25	0.48	2060	107	34	7	291	12	159	8.25	54.64	0.55
3612	0.35	8	0.46	9	0.17	3	0.52	7	0.33	7	0.25	4	10	0.366667	0.326667	-0.04	0.725652	0.930552	1	6686087	6686383	AluJo	+	J	o	16	0.81	31	0.71	0.59	14	0.4	0.53	2044	125	7	7	297	10	161	6.73	54.21	0.46
3619	0.94	4	1	5	1	4	1	4	1	3	1	3	5	1	0.98	-0.02	0.367384	0.72739	1	6691406	6691546	AluSx	+	S	x	0	0	7	0.23	0.5	13	0.37	0.53	2069	116	7	33	141	5	72	7.09	51.06	0.55
3624	1	4	1	4	0.75	4	0.79	4	0.97	5	1	4	7	0.92	0.916667	-0.00333333	0.832091	0.971206	1	6693687	6693986	AluSz	+	S	z	10	1	18	0.45	0.57	18	0.59	0.5	2115	110	0	27	300	7	164	4.67	54.67	0.32
3625	1	4	1	4	0.92	4	1	3	0.94	4	1	4	5	0.98	0.973333	-0.00666667	0.910704	0.994988	1	6696911	6697209	AluJb	-	J	b	0	0	4	0.14	0.48	11	0.28	0.57	2053	154	0	3	299	5	158	3.34	52.84	0.24
3629	0.83	3	1	4	1	4	1	5	1	5	0.91	6	8	0.97	0.943333	-0.0266667	0.837905	0.973578	1	6700610	6700859	AluSx	+	S	x	4	0.75	5	0.18	0.47	4	0.17	0.44	1704	108	76	16	250	8	139	6.4	55.6	0.42
3636	0.66	3	0.95	3	0.61	3	0.83	3	0.83	3	0.78	3	3	0.813333	0.74	-0.0733333	0.874462	0.985353	1	6706946	6707133	AluJb	+	J	b	0	0	6	0.24	0.45	18	0.58	0.5	1032	170	58	11	188	3	101	3.19	53.72	0.22
3638	0.8	5	1	3	1	3	1	3	1	5	0.5	3	9	0.833333	0.933333	0.1	0.788183	0.955213	1	6707598	6707903	AluSc	+	S	c	30	0.8	15	0.5	0.49	8	0.3	0.47	2373	95	10	0	306	9	160	5.88	52.29	0.43
3648	1	3	1	4	0.94	4	1	4	1	4	0.88	4	12	0.96	0.98	0.02	0.804168	0.961232	1	6714837	6715155	AluSc	-	S	c	0	0	3	0.22	0.33	4	0.25	0.36	2384	66	0	63	319	12	164	7.52	51.41	0.58
3662	1	3	1	3	0.97	3	1	3	1	3	1	3	4	1	0.99	-0.01	0.455388	0.780407	1	6725138	6725424	AluJr4	-	J	r4	0	0	9	0.36	0.45	2	0.08	0.45	1828	171	3	3	287	4	150	2.79	52.26	0.21
3663	1	3	0.97	3	1	3	1	3	0.97	3	1	4	5	0.99	0.99	0	1	1	1	6726437	6726761	AluSx	-	S	x	0	0	5	0.22	0.43	8	0.29	0.47	2271	92	0	46	325	5	163	3.08	50.15	0.25
3664	0.75	8	0.95	7	0.92	6	1	4	1	6	1	5	12	1	0.873333	-0.126667	0.00710291	0.253044	1	6728193	6728497	AluY	-	Y	None	0	0	7	0.23	0.5	14	0.51	0.47	2319	85	7	10	305	12	163	7.87	53.44	0.57
3684	1	5	1	4	0.92	5	0.97	4	1	4	1	5	5	0.99	0.973333	-0.0166667	0.672132	0.906399	1	6742706	6742975	AluJb	+	J	b	1	1	8	0.33	0.44	6	0.18	0.51	1520	204	15	4	270	5	152	3.7	56.3	0.24
3695	0.62	4	0.54	4	0.42	6	0.5	4	0.75	6	0.33	3	9	0.526667	0.526667	0	0.973098	1	1	6752973	6753273	AluSx	-	S	x	0	0	7	0.26	0.47	11	0.5	0.42	2046	126	7	27	301	9	155	5.98	51.5	0.46
3710	0.3	8	0.46	6	0.37	9	0.74	7	0.73	7	0.78	10	15	0.75	0.376667	-0.373333	0.0069966	0.251644	1	6762194	6762491	AluSx	-	S	x	0	0	56	0.89	0.71	5	0.2	0.45	2142	87	24	20	298	15	167	10.07	56.04	0.65
3734	0.67	3	0.5	4	0.38	6	0.75	4	0.8	7	0.75	6	8	0.766667	0.516667	-0.25	0.0536836	0.479472	1	6779510	6779813	AluJb	+	J	b	28	1	5	0.2	0.44	7	0.31	0.43	1932	161	3	3	304	8	149	5.26	49.01	0.44
3750	0.33	4	0.67	3	0.83	4	0.33	5	0.6	5	0.75	4	6	0.56	0.61	0.05	0.755392	0.942598	1	6791590	6791898	AluJb	+	J	b	29	0.79	3	0.2	0.34	5	0.24	0.41	1975	152	7	0	309	6	161	3.88	52.1	0.29
3758	0.67	6	0	3	0	4	1	9	0.7	10	0.61	12	23	0.77	0.223333	-0.546667	0.0511325	0.471129	1	6795420	6795733	AluY	+	Y	None	30	0.97	4	0.19	0.41	8	0.27	0.49	2680	32	3	13	314	23	179	14.65	57.01	0.91
3768	0.93	3	0.75	4	1	4	1	4	1	4	0.75	4	7	0.916667	0.893333	-0.0233333	0.643316	0.892967	1	6801875	6802185	AluSz	+	S	z	30	0.87	5	0.18	0.48	3	0.19	0.36	2327	112	3	0	311	7	154	4.5	49.52	0.37
3772	0.8	5	0.88	4	0.15	4	0.77	7	0.75	8	0.92	4	12	0.813333	0.61	-0.203333	0.390304	0.741833	1	6804968	6805255	AluSp	-	S	p	0	0	9	0.33	0.47	10	0.4	0.45	2228	94	3	0	288	12	154	8.33	53.47	0.59
3774	0.8	5	0.8	5	0.75	6	1	6	0.74	5	0.92	5	6	0.886667	0.783333	-0.103333	0.195125	0.629004	1	6805902	6806212	AluJo	+	J	o	23	0.78	16	0.55	0.48	4	0.15	0.47	1900	164	0	19	311	6	159	3.86	51.13	0.31
3812	1	4	0.93	4	0.43	4	1	4	0.91	4	0.96	4	6	0.956667	0.786667	-0.17	0.474319	0.794419	1	6824148	6824435	AluSq	-	S	q	0	0	5	0.23	0.44	9	0.44	0.41	1796	142	56	3	288	6	145	4.17	50.35	0.33
3820	0.8	10	0.83	6	0.53	8	0.56	8	0.71	8	0.83	6	13	0.7	0.72	0.02	0.848523	0.977197	1	6828773	6829081	AluSq2	+	S	q2	28	0.86	6	0.22	0.47	6	0.26	0.44	2186	100	7	16	309	13	163	8.41	52.75	0.6
3835	0.95	3	1	3	0.61	3	0.93	3	0.81	3	1	3	10	0.913333	0.853333	-0.06	0.878619	0.985758	1	6838956	6839273	AluSc	+	S	c	32	0.75	7	0.27	0.45	3	0.17	0.37	2181	104	0	35	318	10	170	6.29	53.46	0.44
3838	1	8	1	6	0.8	5	0.92	5	0.93	3	0.89	3	13	0.913333	0.933333	0.02	0.290884	0.723448	1	6841350	6841624	AluSg	+	S	g	0	0	4	0.21	0.4	5	0.23	0.42	2222	80	4	0	275	13	154	9.45	56	0.61
3839	1	4	0.89	3	0.92	4	0.88	4	1	4	1	4	4	0.96	0.936667	-0.0233333	0.543472	0.839571	1	6841627	6841834	AluJb	+	J	b	26	0.77	15	0.49	0.5	5	0.21	0.44	1156	173	96	0	208	4	101	3.85	48.56	0.33
3843	1	4	0.73	6	1	4	0.94	4	1	3	0.75	6	9	0.896667	0.91	0.0133333	0.691824	0.914577	1	6849865	6850188	AluSz	-	S	z	0	0	5	0.25	0.4	4	0.27	0.38	2213	102	3	59	324	9	162	5.56	50	0.45
3846	0.96	8	1	9	1	6	0.82	3	0.74	8	0.92	6	9	0.826667	0.986667	0.16	0.00993832	0.285216	1	6856190	6856496	AluJb	-	J	b	0	0	2	0.14	0.34	6	0.37	0.37	1981	137	29	13	307	9	157	5.86	51.14	0.45
3847	1	6	1	4	1	4	0.5	4	0.83	6	1	6	7	0.776667	1	0.223333	0.0846067	0.500778	1	6857140	6857419	AluJb	-	J	b	0	0	7	0.39	0.38	7	0.28	0.45	1752	168	39	0	280	7	152	5	54.29	0.34
3849	1	7	1	7	1	6	1	7	1	9	1	5	10	1	1	0	1	1	1	6858057	6858347	AluSq10	-	S	q10	0	0	6	0.32	0.39	22	0.76	0.48	2218	89	31	0	291	10	152	6.87	52.23	0.51
3854	1	5	1	5	0.73	4	1	3	0.87	5	1	3	7	0.956667	0.91	-0.0466667	0.828459	0.969524	1	6862801	6863108	AluJr	-	J	r	0	0	1	0.04	0.45	6	0.25	0.44	1882	140	0	45	308	7	161	4.55	52.27	0.33
3884	1	3	1	3	0.8	5	1	4	0.62	4	1	3	15	0.873333	0.933333	0.06	0.851928	0.977717	1	6890867	6891177	AluY	-	Y	None	0	0	11	0.4	0.47	2	0.15	0.32	2508	87	0	0	311	15	170	9.65	54.66	0.65
3887	0.95	8	0.98	7	0.79	8	1	9	0.88	7	0.9	10	10	0.926667	0.906667	-0.02	0.845885	0.977125	1	6894698	6894990	AluJr	-	J	r	0	0	8	0.45	0.38	6	0.24	0.45	1841	150	10	20	293	10	154	6.83	52.56	0.49
3899	1	4	0.94	4	1	3	0.67	4	1	4	1	3	4	0.89	0.98	0.09	0.614325	0.877904	1	6908223	6908508	AluJr	-	J	r	0	0	8	0.26	0.5	4	0.25	0.38	1298	203	80	25	286	4	134	2.8	46.85	0.27
3903	0.79	6	1	6	0.69	6	0.8	5	0.85	4	1	5	6	0.883333	0.826667	-0.0566667	0.818981	0.966647	1	6919568	6919870	AluJo	+	J	o	22	0.86	4	0.28	0.34	1	0.07	0.33	1877	165	7	3	303	6	158	3.96	52.15	0.3
3904	1	4	0.92	4	0.82	5	0.83	3	0.69	4	0.72	5	7	0.746667	0.913333	0.166667	0.0990287	0.501358	1	6920688	6920999	AluSz	+	S	z	28	0.86	0	0	0.33	10	0.36	0.47	2253	122	0	6	312	7	158	4.49	50.64	0.35
3910	0.37	3	0.95	3	1	3	0.68	4	0.39	4	0.67	4	4	0.58	0.773333	0.193333	0.20304	0.638217	1	6927856	6928169	AluJo	-	J	o	0	0	5	0.33	0.36	6	0.39	0.35	1735	175	16	29	314	4	166	2.55	52.87	0.18
3915	1	8	0.96	9	1	8	0.75	7	1	6	1	4	11	0.916667	0.986667	0.07	0.564301	0.852005	1	6935351	6935644	AluSx3	-	S	x3	0	0	6	0.21	0.48	2	0.09	0.43	2095	102	34	10	294	11	151	7.48	51.36	0.57
3917	1	5	0.98	5	1	3	1	4	0.86	5	1	4	5	0.953333	0.993333	0.04	0.467345	0.7887	1	6939661	6939986	AluJo	-	J	o	0	0	3	0.17	0.38	6	0.27	0.42	1752	132	37	80	326	5	160	3.07	49.08	0.26
3918	0.88	4	0.75	4	1	4	1	4	0.96	4	0.9	4	4	0.953333	0.876667	-0.0766667	0.528269	0.830523	1	6940136	6940433	AluJr4	-	J	r4	0	0	7	0.27	0.46	4	0.16	0.45	1360	191	74	27	298	4	138	2.68	46.31	0.25
3922	0.87	5	0.93	5	1	4	1	5	1	5	1	4	5	1	0.933333	-0.0666667	0.0930397	0.500778	1	6943020	6943251	AluSz6	-	S	z6	0	0	3	0.15	0.45	9	0.36	0.5	1656	134	13	0	232	5	126	4.31	54.31	0.29
3930	0.96	8	0.94	5	0.85	8	0.93	7	0.91	8	0.86	9	9	0.9	0.916667	0.0166667	0.577787	0.858533	1	6964601	6964952	AluJo	-	J	o	0	0	3	0.14	0.45	12	0.39	0.5	1801	133	3	117	352	9	164	5.11	46.59	0.49
3939	0.56	4	0.55	4	0.12	4	0.78	4	0.88	4	0.79	4	4	0.816667	0.41	-0.406667	0.0369754	0.430296	1	6987276	6987392	AluJb	-	J	b	0	0	4	0.15	0.47	3	0.15	0.41	1326	188	59	0	117	4	66	6.84	56.41	0.43
3940	0.89	3	0.38	4	0.5	3	0.75	4	0.2	3	0.62	4	7	0.523333	0.59	0.0666667	0.656612	0.899141	1	6989228	6989408	AluSx	-	S	x	0	0	5	0.19	0.46	21	0.61	0.52	2191	123	6	22	181	7	91	7.73	50.28	0.62
4000	0.77	4	0.91	4	0.77	3	1	4	1	4	0.98	4	4	0.993333	0.816667	-0.176667	0.00203019	0.167513	1	7071260	7071404	AluSx	-	S	x	0	0	9	0.23	0.56	12	0.37	0.53	665	188	166	7	145	4	68	5.52	46.9	0.5
4004	0.67	3	0.76	5	0.39	3	1	5	1	5	0.96	5	5	0.986667	0.606667	-0.38	0.00212445	0.169753	1	7078023	7078191	AluJb	-	J	b	0	0	7	0.23	0.49	5	0.17	0.48	1086	148	12	6	169	5	94	5.92	55.62	0.39
4016	1	4	0.6	4	0.2	5	0.74	5	0.89	3	0.75	4	8	0.793333	0.6	-0.193333	0.900712	0.992584	1	7094210	7094512	AluSg7	-	S	g7	0	0	10	0.37	0.47	6	0.26	0.43	2270	106	7	0	303	8	163	5.28	53.8	0.37
4022	0.67	6	0.94	4	0.9	4	1	4	0.96	5	1	5	8	0.986667	0.836667	-0.15	0.0266607	0.391253	1	7100784	7101081	AluSc	-	S	c	0	0	10	0.41	0.44	13	0.39	0.52	2170	111	7	10	298	8	159	5.37	53.36	0.38
4085	0.87	5	0.94	4	0.33	3	1	3	0.8	3	0.88	4	7	0.893333	0.713333	-0.18	0.336263	0.723448	1	7216034	7216357	AluSq	+	S	q	22	0.91	5	0.16	0.5	5	0.19	0.46	1914	102	12	80	324	7	158	4.32	48.77	0.37
4099	0.88	4	0.43	5	0.63	5	0.95	5	0.9	5	0.88	5	5	0.91	0.646667	-0.263333	0.0651403	0.500778	1	7240572	7240871	AluJb	-	J	b	0	0	11	0.53	0.41	3	0.28	0.29	1861	177	20	0	300	5	147	3.33	49	0.28
4121	0.27	4	0.48	4	0.54	4	0.7	4	0.88	4	0.65	4	4	0.743333	0.43	-0.313333	0.049914	0.467454	1	7288382	7288441	AluYc	+	Y	c	0	0	9	0.29	0.5	9	0.22	0.57	504	83	0	0	60	4	42	13.33	70	0.56
4126	0.92	6	0.67	3	0.75	4	1	5	0.89	6	1	5	8	0.963333	0.78	-0.183333	0.0459977	0.456578	1	7295405	7295703	AluSx1	+	S	x1	16	0.88	9	0.3	0.49	16	0.54	0.49	2051	127	7	7	299	8	159	5.35	53.18	0.39
4278	0.33	3	1	4	0.29	4	1	3	0.67	6	0.5	4	14	0.723333	0.54	-0.183333	0.714519	0.925262	1	7602941	7603226	AluY	-	Y	None	0	0	7	0.23	0.49	9	0.55	0.36	2230	77	0	11	286	14	162	9.79	56.64	0.63
4283	0.75	5	0.75	5	0.9	5	0.88	8	1	4	0.83	6	14	0.903333	0.8	-0.103333	0.229321	0.67027	1	7617087	7617385	AluSx3	+	S	x3	19	0.89	7	0.2	0.54	8	0.25	0.51	2190	104	7	7	299	14	166	9.36	55.52	0.61
4322	1	3	0.75	11	1	6	0.9	10	0.98	6	0.7	10	19	0.86	0.916667	0.0566667	0.425356	0.763601	1	7695386	7695687	AluY	+	Y	None	19	1	9	0.22	0.58	10	0.29	0.53	2429	63	0	7	302	19	172	12.58	56.95	0.78
4343	0.72	3	1	3	0.22	3	1	4	0.7	3	0.92	3	4	0.873333	0.646667	-0.226667	0.524083	0.82798	1	7720427	7720617	AluJb	+	J	b	21	0.81	6	0.2	0.49	16	0.37	0.6	1113	188	90	61	191	4	81	4.19	42.41	0.47
4344	0.69	4	0.5	3	0.62	4	0.56	4	0.88	3	0.72	3	5	0.72	0.603333	-0.116667	0.328155	0.723448	1	7725492	7725791	AluJb	+	J	b	17	0.82	25	0.48	0.65	14	0.47	0.49	1866	180	0	3	300	5	156	3.33	52	0.25
4400	0.83	6	1	4	0.8	5	1	3	0.83	6	1	4	16	0.943333	0.876667	-0.0666667	0.439512	0.773679	1	7801342	7801634	AluY	+	Y	None	13	1	6	0.46	0.33	9	0.37	0.45	2498	55	3	0	293	16	165	10.92	56.31	0.69
4408	0.93	5	0.25	4	0.47	5	1	3	0.75	3	1	3	10	0.916667	0.55	-0.366667	0.0853151	0.500778	1	7807967	7808271	AluSz	-	S	z	0	0	3	0.2	0.35	6	0.32	0.39	2407	85	3	0	305	10	164	6.56	53.77	0.45
4413	0.78	3	0.78	3	0.75	4	0.75	4	0.75	4	0.62	6	9	0.706667	0.77	0.0633333	0.444889	0.777878	1	7817545	7817815	AluSz	+	S	z	20	0.85	0	0	0.33	6	0.44	0.33	1930	92	114	0	271	9	145	6.64	53.51	0.47
4421	1	4	1	6	0.83	3	0.93	3	0.8	5	1	3	16	0.91	0.943333	0.0333333	0.571832	0.856284	1	7832667	7832971	AluSq2	+	S	q2	9	0.89	6	0.26	0.43	4	0.24	0.37	2333	102	3	3	305	16	171	10.49	56.07	0.68
4429	0	4	0.22	4	0.58	5	0.95	4	0.56	4	0.4	7	7	0.636667	0.266667	-0.37	0.130812	0.539342	1	7843094	7843384	AluSz	+	S	z	13	0.92	11	0.49	0.43	40	0.74	0.69	1792	155	28	14	291	7	152	4.81	52.23	0.35
4437	1	4	0.9	5	1	4	0.67	3	0.92	6	0.92	6	10	0.836667	0.966667	0.13	0.0828786	0.500778	1	7860277	7860556	AluSx1	-	S	x1	0	0	5	0.2	0.44	3	0.18	0.36	2063	89	57	4	280	10	147	7.14	52.5	0.53
4441	0.93	3	0.92	4	1	3	1	4	1	3	0.89	3	4	0.963333	0.95	-0.0133333	0.599273	0.869755	1	7864459	7864759	AluJb	-	J	b	0	0	4	0.37	0.29	10	0.32	0.51	1904	159	3	10	301	4	160	2.66	53.16	0.19
4477	1	4	0.78	5	0.58	8	1	8	0.77	8	0.75	5	12	0.836667	0.786667	-0.05	0.880661	0.986639	1	7908595	7908876	AluSz	-	S	z	0	0	8	0.28	0.48	8	0.29	0.47	1962	135	14	0	282	12	162	8.51	57.45	0.52
4485	1	6	0.75	4	0.88	4	1	5	1	5	1	4	8	1	0.876667	-0.123333	0.0833708	0.500778	1	7915367	7915626	AluSq	+	S	q	4	0.75	3	0.13	0.43	3	0.11	0.48	1924	119	0	0	260	8	146	6.15	56.15	0.4
4512	0.85	4	0.97	4	0.97	4	0.97	4	1	4	1	3	5	0.99	0.93	-0.06	0.10422	0.506562	1	7947549	7947838	AluJb	+	J	b	22	0.91	4	0.15	0.46	6	0.31	0.39	1592	134	59	45	290	5	139	3.45	47.93	0.3
4516	0.71	7	1	9	1	7	0.85	5	1	7	1	10	17	0.95	0.903333	-0.0466667	0.846582	0.977125	1	7949845	7950136	AluY	+	Y	None	10	1	5	0.19	0.46	4	0.19	0.41	2301	82	0	3	292	17	163	11.64	55.82	0.76
4520	0.67	5	0.7	5	0.88	6	1	7	0.83	10	0.67	7	11	0.833333	0.75	-0.0833333	0.362132	0.72739	1	7952530	7952846	AluSx1	-	S	x1	0	0	14	0.38	0.55	7	0.34	0.4	2107	117	0	35	317	11	169	6.94	53.31	0.49
4521	0.83	3	0.8	5	0.75	5	0.81	7	1	7	0.9	7	8	0.903333	0.793333	-0.11	0.173749	0.600945	1	7953291	7953579	AluJb	+	J	b	27	0.78	8	0.37	0.42	12	0.43	0.48	1590	153	81	0	289	8	149	5.54	51.56	0.42
4524	0.5	5	0.74	5	0.43	7	0.55	6	0.47	7	0.53	3	9	0.516667	0.556667	0.04	0.71599	0.926108	1	7954760	7954998	AluJr	+	J	r	8	0.88	10	0.31	0.52	6	0.25	0.44	1367	138	213	0	239	9	135	7.53	56.49	0.47
4534	0.15	5	0.08	4	0.45	5	0	4	0.32	5	0.06	3	5	0.126667	0.226667	0.1	0.328992	0.723448	1	7962660	7962780	AluJr	-	J	r	0	0	8	0.26	0.5	14	0.42	0.59	766	132	50	8	121	5	69	8.26	57.02	0.51
4535	0.81	3	0.58	8	0.82	4	0.78	5	0.97	8	0.62	4	13	0.79	0.736667	-0.0533333	0.502239	0.813102	1	7963464	7963748	AluSx	-	S	x	0	0	4	0.21	0.57	3	0.23	0.33	1880	135	10	10	285	13	156	9.12	54.74	0.62
4543	1	3	1	3	1	3	1	3	1	3	1	3	3	1	1	0	1	1	1	7968376	7968540	AluSx	+	S	x	20	1	7	0.25	0.47	4	0.15	0.46	2112	114	16	33	165	3	83	3.64	50.3	0.31
4573	1	6	0.78	4	0.95	5	1	4	0.8	7	0.83	6	9	0.876667	0.91	0.0333333	0.755303	0.942572	1	7988670	7988947	AluSz6	+	S	z6	9	0.89	5	0.32	0.36	7	0.33	0.42	2032	112	47	0	278	9	161	6.47	57.91	0.39
4577	0.65	4	0.58	5	0.57	5	0.83	8	0.82	5	1	3	12	0.883333	0.6	-0.283333	0.0654514	0.500778	1	7991922	7992213	AluSp	+	S	p	16	0.94	3	0.2	0.35	0	0	0.36	2331	75	24	0	292	12	160	8.22	54.79	0.56
4580	0.75	4	0.73	5	0.64	5	1	4	1	4	0.63	5	5	0.876667	0.706667	-0.17	0.10655	0.508066	1	7994154	7994472	AluJo	+	J	o	35	0.74	8	0.27	0.49	9	0.3	0.49	1785	151	16	38	319	5	165	3.13	51.72	0.24
4586	0.78	3	0.78	3	0.61	4	0.9	4	0.93	4	1	3	4	0.943333	0.723333	-0.22	0.0339606	0.420726	1	7997236	7997522	AluJb	-	J	b	0	0	6	0.3	0.4	6	0.4	0.35	1682	150	70	28	287	4	152	2.79	52.96	0.2
4603	1	4	0.77	5	0.84	5	0.88	5	0.78	3	0.86	4	5	0.84	0.87	0.03	0.45454	0.780407	1	8013647	8013785	AluJo	+	J	o	15	0.8	26	0.52	0.63	35	0.83	0.58	837	129	0	50	139	5	74	7.19	53.24	0.51
4607	1	3	0.95	3	1	4	1	3	0.88	4	0.96	3	6	0.946667	0.983333	0.0366667	0.401103	0.750069	1	8016974	8017256	AluSz	+	S	z	21	0.67	4	0.16	0.45	4	0.17	0.44	2052	102	28	7	283	6	153	4.24	54.06	0.29
4608	0.9	5	0.81	6	0.79	6	0.93	5	0.77	5	0.97	6	6	0.89	0.833333	-0.0566667	0.318777	0.723448	1	8017531	8017815	AluJr	-	J	r	0	0	3	0.12	0.44	10	0.45	0.42	1597	133	88	35	285	6	149	4.21	52.28	0.31
4615	0.94	4	0.96	4	1	5	0.9	6	0.92	4	0.78	6	6	0.866667	0.966667	0.1	0.0629052	0.500778	1	8023155	8023418	AluJb	-	J	b	0	0	7	0.48	0.34	13	0.46	0.48	1732	163	0	4	264	6	147	4.55	55.68	0.3
4616	0.95	4	0.93	10	1	9	1	7	1	6	1	7	11	1	0.96	-0.04	0.105193	0.506562	1	8023433	8023734	AluSx1	-	S	x1	0	0	8	0.33	0.44	9	0.33	0.47	2121	122	30	0	302	11	160	7.28	52.98	0.52
4650	0.75	4	0.86	7	1	4	0.8	5	1	3	0.75	4	10	0.85	0.87	0.02	0.920534	0.997575	1	8042026	8042345	AluSx1	-	S	x1	0	0	15	0.42	0.54	10	0.42	0.44	2272	100	3	38	320	10	156	6.25	48.75	0.53
4655	0.8	5	0.85	4	0.93	5	0.86	4	0.71	4	0.74	4	5	0.77	0.86	0.09	0.25905	0.704732	1	8048114	8048409	AluSx1	-	S	x1	0	0	7	0.21	0.52	7	0.26	0.46	1974	135	17	14	296	5	153	3.38	51.69	0.26
4657	1	6	1	7	1	5	1	4	1	5	1	8	12	1	1	0	1	1	1	8050933	8051240	AluSg	-	S	g	0	0	2	0.11	0.53	6	0.28	0.41	2357	104	0	3	308	12	156	7.79	50.65	0.62
4661	0.89	9	1	5	1	6	0.9	10	0.8	5	0.95	7	14	0.883333	0.963333	0.08	0.127024	0.533644	1	8053824	8054123	AluSz	-	S	z	0	0	6	0.28	0.43	4	0.23	0.37	2143	127	3	0	300	14	166	9.33	55.33	0.62
4673	0.95	7	0.9	7	0.86	7	0.95	7	0.46	7	0.89	7	13	0.766667	0.903333	0.136667	0.476593	0.795819	1	8061343	8061643	AluSc8	+	S	c8	33	0.79	7	0.38	0.39	15	0.46	0.51	2027	64	64	15	301	13	165	8.64	54.82	0.58
4677	0.98	8	0.94	4	0.75	4	0.96	7	1	3	1	4	13	0.986667	0.89	-0.0966667	0.132594	0.542419	1	8065708	8065981	AluSg4	-	S	g4	0	0	9	0.32	0.48	10	0.33	0.5	2069	77	88	0	274	13	150	9.49	54.74	0.63
4699	0.8	5	1	5	0.72	4	0.93	5	0.88	6	0.92	4	6	0.91	0.84	-0.07	0.976953	1	1	8094879	8095205	AluJo	-	J	o	0	0	4	0.18	0.43	5	0.2	0.45	1606	141	18	95	327	6	164	3.67	50.15	0.29
4708	1	3	0.87	3	1	3	0.78	3	0.86	3	1	3	3	0.88	0.956667	0.0766667	0.390194	0.741703	1	8104741	8104905	FAM	+	FAM	None	6	1	7	0.33	0.41	13	0.43	0.49	968	194	0	6	165	3	86	3.64	52.12	0.27
4709	1	3	1	5	1	4	0.86	7	1	3	0.9	5	8	0.92	1	0.08	0.0842946	0.500778	1	8104988	8105256	AluSx	-	S	x	0	0	5	0.25	0.4	14	0.57	0.44	1901	126	7	15	269	8	147	5.95	54.65	0.41
4712	1	7	1	12	0.91	8	1	10	1	5	0.94	9	13	0.98	0.97	-0.01	0.877493	0.985353	1	8106665	8106966	AluSz	+	S	z	28	0.82	4	0.27	0.35	3	0.19	0.36	2084	113	26	0	302	13	158	8.61	52.32	0.64
4727	0.71	4	0.92	6	0.49	7	0.7	6	0.9	7	0.76	6	8	0.786667	0.706667	-0.08	0.718097	0.927183	1	8119409	8119718	AluJb	-	J	b	0	0	4	0.23	0.38	3	0.14	0.42	2083	145	16	10	310	8	156	5.16	50.32	0.41
4734	0.83	4	0.9	5	0.86	3	0.69	4	1	5	0.92	6	7	0.87	0.863333	-0.00666667	0.49144	0.805916	1	8122328	8122629	AluSz	-	S	z	0	0	9	0.42	0.41	6	0.27	0.42	2034	99	26	36	302	7	157	4.64	51.99	0.35
4738	0.79	8	1	5	1	5	0.89	7	0.94	9	0.64	7	11	0.823333	0.93	0.106667	0.19062	0.624592	1	8124168	8124460	AluSz6	-	S	z6	0	0	5	0.25	0.4	7	0.55	0.32	2197	106	3	0	293	11	160	7.51	54.61	0.51
4744	1	6	0.92	4	0.79	5	0.85	5	0.95	7	0.94	8	13	0.913333	0.903333	-0.01	0.754834	0.942236	1	8127789	8128093	AluSz	-	S	z	0	0	6	0.41	0.34	19	0.67	0.48	2204	108	0	7	305	13	157	8.52	51.48	0.65
4757	0.78	5	0.92	6	0.83	6	0.67	3	0.94	3	1	6	11	0.87	0.843333	-0.0266667	0.423289	0.762226	1	8135347	8135646	AluSx	-	S	x	0	0	7	0.32	0.42	4	0.14	0.48	2007	97	3	70	300	11	162	7.33	54	0.51
4766	0	4	0.61	5	0.57	5	0.92	5	0.77	5	0.78	4	6	0.823333	0.393333	-0.43	0.103462	0.506562	1	8142788	8143096	AluSz	+	S	z	25	0.96	2	0.12	0.36	2	0.09	0.41	2218	94	19	23	309	6	152	3.88	49.19	0.33
4770	1	9	1	5	0.78	3	0.75	4	0.67	3	0.79	7	12	0.736667	0.926667	0.19	0.0582891	0.491357	1	8147609	8147827	AluY	-	Y	None	0	0	2	0.08	0.46	6	0.28	0.42	1650	68	14	32	219	12	118	10.96	53.88	0.76
4787	0.75	6	0.92	6	0.74	5	0.98	6	0.89	6	0.96	4	8	0.943333	0.803333	-0.14	0.0720949	0.500778	1	8164969	8165257	AluJb	-	J	b	0	0	5	0.19	0.46	4	0.21	0.39	1737	156	31	14	289	8	162	5.54	56.06	0.35
4797	0.83	6	0.93	4	1	4	0.96	5	0.94	4	0.92	6	10	0.94	0.92	-0.02	0.882343	0.987171	1	8176312	8176593	AluSz6	+	S	z6	12	0.92	11	0.34	0.51	7	0.28	0.45	1972	99	50	7	282	10	153	7.09	54.26	0.48
4810	0.87	5	1	5	1	5	1	5	1	4	0.92	5	5	0.973333	0.956667	-0.0166667	0.868733	0.983318	1	8190009	8190306	AluJr4	-	J	r4	0	0	11	0.36	0.5	7	0.22	0.51	1806	144	10	30	298	5	142	3.36	47.65	0.3
4817	1	5	1	5	0.87	3	0.75	4	0.95	5	0.92	4	5	0.873333	0.956667	0.0833333	0.16751	0.591828	1	8195423	8195711	AluSz	-	S	z	0	0	11	0.38	0.49	7	0.25	0.48	1703	170	45	3	289	5	152	3.46	52.6	0.25
4820	0.8	5	0.93	3	1	3	0.75	6	0.97	6	0.63	5	7	0.783333	0.91	0.126667	0.363799	0.72739	1	8198573	8198875	AluJb	-	J	b	0	0	10	0.4	0.45	8	0.45	0.38	1990	139	7	10	303	7	164	4.62	54.13	0.32
4822	0.4	5	0.33	3	1	5	0.8	5	0.33	3	1	4	9	0.71	0.576667	-0.133333	0.777307	0.950605	1	8199348	8199674	AluSz6	+	S	z6	27	0.81	6	0.35	0.37	11	0.52	0.41	2099	110	3	58	327	9	162	5.5	49.54	0.45
4842	0.9	5	0.84	5	1	3	1	4	1	5	0.85	5	5	0.95	0.913333	-0.0366667	0.511724	0.819953	1	8214400	8214728	AluJb	-	J	b	0	0	10	0.31	0.51	13	0.53	0.44	1924	146	3	55	329	5	160	3.04	48.63	0.27
4865	0.6	5	0.86	6	1	4	0.75	5	0.6	5	1	4	6	0.783333	0.82	0.0366667	0.884526	0.987867	1	8231356	8231444	AluSx1	-	S	x1	0	0	10	0.3	0.52	3	0.15	0.41	710	101	0	0	89	6	56	13.48	62.92	0.68
4876	1	4	1	6	0.93	6	0.81	5	1	4	0.73	5	7	0.846667	0.976667	0.13	0.233025	0.67448	1	8235906	8236185	AluSg	+	S	g	5	1	3	0.14	0.41	2	0.08	0.45	2088	111	18	4	280	7	152	5	54.29	0.34
4890	1	4	1	4	1	4	1	4	0.88	4	1	4	4	0.96	1	0.04	0.332932	0.723448	1	8245289	8245483	AluJr	+	J	r	17	1	6	0.21	0.48	9	0.38	0.43	1089	179	10	20	195	4	92	4.1	47.18	0.37
4893	1	4	0.97	5	0.87	5	0.87	5	0.93	5	0.64	5	5	0.813333	0.946667	0.133333	0.125598	0.532479	1	8246756	8247074	AluJb	+	J	b	14	0.86	2	0.19	0.29	7	0.33	0.42	1759	172	0	47	319	5	159	3.13	49.84	0.25
4904	0.75	4	0.8	5	1	7	1	7	0.71	8	1	6	11	0.903333	0.85	-0.0533333	0.522985	0.827356	1	8251888	8252196	AluSx	-	S	x	0	0	9	0.3	0.49	20	0.67	0.49	2219	126	10	0	309	11	162	7.12	52.43	0.52
4905	0.82	9	0.86	6	0.89	14	0.82	11	0.87	9	1	5	17	0.896667	0.856667	-0.04	0.381738	0.735821	1	8252306	8252606	AluSg4	+	S	g4	22	0.91	15	0.52	0.48	6	0.28	0.42	2384	60	13	10	301	17	164	11.3	54.49	0.77
4911	0.94	6	0.96	7	1	7	0.97	6	1	6	0.9	7	7	0.956667	0.966667	0.01	0.922035	0.998114	1	8256739	8257039	AluJb	+	J	b	23	0.83	6	0.2	0.49	4	0.17	0.44	1863	166	10	7	301	7	156	4.65	51.83	0.35
4925	1	6	0.93	6	0.86	7	1	6	0.83	7	1	4	8	0.943333	0.93	-0.0133333	0.630905	0.88573	1	8265533	8265833	AluSx	-	S	x	0	0	15	0.51	0.49	12	0.51	0.44	1937	130	3	30	301	8	160	5.32	53.16	0.38
4926	0.86	6	1	5	0.95	8	0.94	8	0.96	8	0.95	5	8	0.95	0.936667	-0.0133333	0.844065	0.97639	1	8266182	8266454	AluSg	-	S	g	0	0	11	0.45	0.45	9	0.38	0.44	1774	114	84	4	273	8	144	5.86	52.75	0.43
4934	1	5	0.79	6	0.91	5	0.69	7	0.67	6	0.88	4	7	0.746667	0.9	0.153333	0.157814	0.578688	1	8270116	8270430	AluJb	-	J	b	0	0	10	0.29	0.53	17	0.54	0.5	1898	168	3	22	315	7	164	4.44	52.06	0.34
4944	1	4	0.89	4	0.93	4	0.93	4	0.82	4	0.88	4	4	0.876667	0.94	0.0633333	0.230326	0.671365	1	8278247	8278393	AluYa5	-	Y	a5	0	0	10	0.34	0.49	9	0.26	0.53	486	231	27	34	147	4	75	5.44	51.02	0.42
4963	1	5	0.89	3	0.67	3	1	6	1	6	1	6	12	1	0.853333	-0.146667	0.0893783	0.500778	1	8293127	8293445	AluSq2	-	S	q2	0	0	15	0.6	0.45	8	0.59	0.33	2298	84	3	0	319	12	163	7.52	51.1	0.58
4974	0.33	3	1	3	0.56	3	0.64	3	0.42	3	0.72	3	3	0.593333	0.63	0.0366667	0.534996	0.834366	1	8299711	8299811	FLAM_C	-	FLAM_C	None	0	0	8	0.25	0.5	17	0.45	0.55	395	160	267	10	101	3	52	5.94	51.49	0.46
4988	0.86	7	1	3	0.6	5	0.8	5	0.86	7	0.62	4	8	0.76	0.82	0.06	0.406262	0.750069	1	8305388	8305688	AluSx3	+	S	x3	22	0.91	12	0.51	0.44	11	0.35	0.51	2146	96	23	30	301	8	153	5.32	50.83	0.42
4991	0.46	4	0	4	0.56	3	0.67	3	0.5	3	0.5	3	7	0.556667	0.34	-0.216667	0.260293	0.706157	1	8306994	8307326	AluSx	-	S	x	0	0	6	0.26	0.43	17	0.53	0.51	2112	111	0	63	333	7	167	4.2	50.15	0.34
4992	0	4	0.25	8	1	3	0.53	5	0.93	5	0	3	13	0.486667	0.416667	-0.07	0.931904	1	1	8307533	8307835	AluSp	+	S	p	20	0.9	11	0.35	0.5	7	0.34	0.41	2371	96	3	3	303	13	162	8.58	53.47	0.6
4993	0.84	6	0.33	4	0.29	5	0.6	6	0.49	5	0.42	6	6	0.503333	0.486667	-0.0166667	0.996206	1	1	8308245	8308547	AluJb	+	J	b	23	0.91	8	0.43	0.39	7	0.28	0.45	1779	175	23	16	303	6	153	3.96	50.5	0.32
5018	1	6	0.8	5	0.92	3	0.8	5	1	3	1	3	8	0.933333	0.906667	-0.0266667	0.594297	0.867462	1	8322531	8322831	AluSq2	+	S	q2	23	0.83	20	0.69	0.48	4	0.19	0.41	2082	130	27	10	301	8	148	5.32	49.17	0.44
5033	0.89	7	0.81	7	0.83	6	0.83	7	0.86	7	0.79	7	7	0.826667	0.843333	0.0166667	0.747931	0.939504	1	8329233	8329532	AluJb	-	J	b	0	0	2	0.11	0.39	5	0.18	0.48	1897	147	40	3	300	7	166	4.67	55.33	0.31
5036	1	3	0.6	3	1	3	1	3	1	3	1	3	8	1	0.866667	-0.133333	0.308736	0.723448	1	8331970	8332242	AluSx1	-	S	x1	0	0	6	0.18	0.52	6	0.27	0.42	2179	99	0	0	273	8	144	5.86	52.75	0.43
5044	1	3	1	3	0.6	4	0.88	4	0.92	4	0.57	4	4	0.79	0.866667	0.0766667	0.283224	0.723448	1	8337686	8337897	AluJo	-	J	o	0	0	12	0.38	0.51	4	0.14	0.48	1310	156	0	33	212	4	109	3.77	51.42	0.29
5045	1	3	1	3	0.89	3	0.72	3	1	3	0.67	3	4	0.796667	0.963333	0.166667	0.261058	0.707122	1	8337914	8338220	AluJb	-	J	b	0	0	13	0.35	0.55	8	0.28	0.48	1711	173	39	33	307	4	146	2.61	47.56	0.23
5064	0.93	5	0.63	5	0.68	5	0.8	5	0.87	5	0.85	6	6	0.84	0.746667	-0.0933333	0.587479	0.863959	1	8348961	8349274	AluJb	+	J	b	30	0.9	6	0.29	0.41	3	0.29	0.29	2013	156	10	16	314	6	156	3.82	49.68	0.31
5089	1	3	1	5	0.85	5	1	4	0.9	5	0.87	4	5	0.923333	0.95	0.0266667	0.543266	0.839548	1	8367491	8367609	FLAM_C	-	FLAM_C	None	0	0	5	0.21	0.44	4	0.14	0.48	711	151	109	0	119	5	65	8.4	54.62	0.58
5097	0.82	5	0.92	4	1	5	0.9	5	1	4	0.86	6	8	0.92	0.913333	-0.00666667	0.987922	1	1	8377052	8377343	AluSx1	-	S	x1	0	0	10	0.25	0.59	15	0.44	0.52	2195	106	14	3	292	8	163	5.48	55.82	0.35
5098	0.92	3	0.85	4	0.92	3	0.94	3	0.96	4	0.97	4	4	0.956667	0.896667	-0.06	0.0798399	0.500778	1	8377538	8377643	AluJo	+	J	o	0	0	11	0.32	0.53	43	1.02	0.58	794	85	94	0	106	4	67	7.55	63.21	0.38
5099	0.89	3	1	3	1	4	1	3	1	5	1	4	10	1	0.963333	-0.0366667	0.335911	0.723448	1	8379059	8379358	AluSx	+	S	x	19	0.74	19	0.47	0.57	11	0.49	0.43	2413	87	3	0	300	10	161	6.67	53.67	0.47
5117	0.88	4	0.6	5	0.83	6	0.88	8	0.93	7	1	6	13	0.936667	0.77	-0.166667	0.0951745	0.500778	1	8400973	8401278	AluSc8	+	S	c8	19	0.95	9	0.38	0.44	19	0.59	0.51	2310	78	3	29	306	13	167	8.5	54.58	0.58
5145	1	4	1	3	1	4	1	4	1	5	1	5	5	1	1	0	1	1	1	8461397	8461527	AluSx	+	S	x	28	0.71	6	0.33	0.38	8	0.29	0.47	685	155	0	0	131	5	65	7.63	49.62	0.62
5147	0.83	6	1	6	1	6	0.71	7	1	5	0.9	5	11	0.87	0.943333	0.0733333	0.46495	0.787035	1	8461919	8462226	AluSc	-	S	c	0	0	10	0.36	0.47	9	0.34	0.46	2230	81	7	18	308	11	159	7.14	51.62	0.54
5148	0.88	4	1	6	1	7	0.75	8	0.81	6	1	7	13	0.853333	0.96	0.106667	0.328752	0.723448	1	8462959	8463256	AluSg	-	S	g	0	0	7	0.35	0.4	4	0.21	0.4	2390	91	0	0	298	13	167	8.72	56.04	0.56
5164	1	3	1	3	1	4	1	3	1	3	1	3	13	1	1	0	1	1	1	8486234	8486528	AluY	+	Y	None	19	1	3	0.15	0.4	2	0.08	0.47	2492	58	14	0	295	13	164	8.81	55.59	0.57
5171	1	4	1	4	0.9	4	1	4	1	3	0.95	4	4	0.983333	0.966667	-0.0166667	0.791666	0.956775	1	8498037	8498349	AluJr4	-	J	r4	0	0	5	0.2	0.45	6	0.35	0.37	1645	179	19	32	313	4	143	2.56	45.69	0.25
5175	0.92	3	1	4	0.6	5	1	4	1	4	1	3	9	1	0.84	-0.16	0.105634	0.506836	1	8500666	8500974	AluSx	+	S	x	18	0.89	10	0.33	0.49	6	0.2	0.49	2133	107	7	36	309	9	158	5.83	51.13	0.45
5176	0.92	3	1	4	1	3	1	3	1	3	1	3	6	1	0.973333	-0.0266667	0.349605	0.723747	1	8502164	8502465	AluSx	+	S	x	19	1	6	0.52	0.3	6	0.25	0.44	2042	132	10	17	302	6	153	3.97	50.66	0.31
5197	1	3	1	4	0.67	3	1	3	1	3	1	3	4	1	0.89	-0.11	0.311311	0.723448	1	8531578	8531873	AluJo	-	J	o	0	0	6	0.21	0.48	7	0.31	0.43	1764	186	10	3	296	4	146	2.7	49.32	0.23
5206	0.85	5	0.83	5	0.87	4	0.93	5	0.85	5	0.82	5	11	0.866667	0.85	-0.0166667	0.661908	0.901603	1	8541181	8541473	AluSc	-	S	c	0	0	7	0.37	0.39	2	0.15	0.33	2297	96	3	0	293	11	163	7.51	55.63	0.49
5210	0.93	3	1	3	1	4	0.8	5	0.83	6	0.94	8	10	0.856667	0.976667	0.12	0.0413821	0.443086	1	8545140	8545429	AluSp	+	S	p	8	1	2	0.12	0.37	4	0.28	0.34	2169	114	3	0	290	10	155	6.9	53.45	0.49
5211	1	4	0.64	7	1	5	0.83	6	1	4	0.89	3	13	0.906667	0.88	-0.0266667	0.742255	0.937692	1	8545857	8546157	AluSc	-	S	c	0	0	5	0.33	0.35	1	0.08	0.32	2428	80	0	3	301	13	160	8.64	53.16	0.62
5216	0.94	8	1	5	1	6	1	6	1	6	1	9	16	1	0.98	-0.02	0.367384	0.72739	1	8549829	8550129	AluY	+	Y	None	16	1	1	0.09	0.3	11	0.46	0.44	2440	70	0	13	301	16	165	10.63	54.82	0.71
5226	1	6	1	7	0.77	6	1	5	0.74	10	0.92	7	13	0.886667	0.923333	0.0366667	0.591572	0.866093	1	8554505	8554796	AluY	+	Y	None	30	0.87	3	0.23	0.32	6	0.21	0.48	2204	82	65	0	292	13	148	8.9	50.68	0.72
5236	1	5	0.98	5	0.9	5	0.83	5	0.89	5	0.81	5	5	0.843333	0.96	0.116667	0.045415	0.454455	1	8567186	8567360	AluJb	+	J	b	25	0.76	1	0.04	0.42	11	0.38	0.48	880	183	11	23	175	5	96	5.71	54.86	0.38
5240	0.97	3	1	3	0.75	4	1	3	1	4	1	3	7	1	0.906667	-0.0933333	0.160093	0.581659	1	8569585	8569873	AluJo	+	J	o	22	0.73	11	0.47	0.45	6	0.26	0.44	1725	159	52	3	289	7	149	4.84	51.56	0.36
5246	1	4	0.98	3	0.92	4	1	4	0.89	4	0.96	4	4	0.95	0.966667	0.0166667	0.705634	0.920535	1	8575155	8575432	AluJo	+	J	o	11	0.91	3	0.15	0.4	8	0.29	0.47	1575	162	50	18	278	4	140	2.88	50.36	0.23
5247	1	3	0.83	5	1	3	0.92	4	1	3	0.94	3	7	0.953333	0.943333	-0.01	0.773783	0.948751	1	8575435	8575697	AluSx1	+	S	x1	10	0.9	4	0.17	0.43	8	0.34	0.43	1789	114	110	0	263	7	147	5.32	55.89	0.34
5248	0.98	8	1	7	1	6	1	8	0.96	8	0.97	8	9	0.976667	0.993333	0.0166667	0.304478	0.723448	1	8575994	8576308	AluSx1	+	S	x1	27	0.89	6	0.26	0.43	4	0.26	0.35	1865	152	19	38	315	9	166	5.71	52.7	0.42
5274	0.94	4	0.64	3	0.83	4	0.95	4	0.95	3	0.96	4	4	0.953333	0.803333	-0.15	0.0780717	0.500778	1	8606042	8606337	AluJb	-	J	b	0	0	14	0.61	0.43	4	0.24	0.37	1787	186	30	0	296	4	151	2.7	51.01	0.21
5289	1	3	1	5	1	5	0.95	4	1	3	0.6	5	7	0.85	1	0.15	0.13164	0.540791	1	8625486	8625789	AluSq	+	S	q	19	0.79	1	0.08	0.32	4	0.18	0.42	2278	99	0	13	304	7	164	4.61	53.95	0.32
5321	0.54	5	0.77	5	0.54	6	0.57	5	0.46	6	0.61	5	6	0.546667	0.616667	0.07	0.529349	0.830898	1	8665195	8665490	AluSc8	-	S	c8	0	0	3	0.19	0.36	7	0.28	0.45	2166	118	17	7	296	6	150	4.05	50.68	0.32
5322	1	5	1	4	1	4	1	4	1	5	1	4	6	1	1	0	1	1	1	8665520	8665830	AluSx	+	S	x	26	1	7	0.3	0.44	3	0.17	0.39	2050	119	26	32	311	6	155	3.86	49.84	0.31
5324	0.83	3	1	3	1	4	1	3	1	5	1	3	6	1	0.943333	-0.0566667	0.323295	0.723448	1	8667138	8667437	AluJb	+	J	b	16	1	2	0.14	0.34	10	0.45	0.42	1875	173	3	7	300	6	154	4	51.33	0.31
5331	1	6	0.93	6	0.97	5	0.81	6	1	6	1	5	6	0.936667	0.966667	0.03	0.995852	1	1	8669919	8670126	AluJb	-	J	b	0	0	4	0.3	0.33	12	0.47	0.45	1265	178	5	10	208	6	113	5.77	54.33	0.41
5332	0.89	4	1	4	0.87	5	1	5	1	4	0.98	4	11	0.993333	0.92	-0.0733333	0.130326	0.538589	1	8670368	8670678	AluSg	+	S	g	25	0.84	9	0.42	0.42	4	0.24	0.37	2335	93	3	22	311	11	165	7.07	53.05	0.5
5350	1	7	0.92	6	1	7	1	7	1	9	0.8	5	14	0.933333	0.973333	0.04	0.771814	0.948473	1	8698843	8699131	AluY	-	Y	None	0	0	3	0.19	0.35	5	0.27	0.38	2295	73	59	0	289	14	153	9.69	52.94	0.7
5355	0.8	5	0.93	5	0.88	4	0.8	5	1	5	1	4	5	0.933333	0.87	-0.0633333	0.188031	0.621415	1	8706308	8706625	AluJo	+	J	o	32	0.81	3	0.23	0.33	3	0.12	0.45	1683	195	6	31	318	5	154	3.14	48.43	0.27
5374	1	4	0.75	4	0.55	6	0.94	6	1	6	1	6	11	0.98	0.766667	-0.213333	0.179445	0.609389	1	8719334	8719637	AluSx1	+	S	x1	22	0.86	5	0.31	0.36	1	0.09	0.3	2277	118	0	0	304	11	163	7.24	53.62	0.51
5382	1	6	0.96	6	0.92	6	1	4	1	5	1	4	7	1	0.96	-0.04	0.116371	0.520401	1	8729142	8729457	AluJb	-	J	b	0	0	0	0	0.38	4	0.26	0.35	1784	130	3	98	316	7	174	4.43	55.06	0.3
5390	1	7	0.96	9	0.97	8	0.88	8	0.9	11	0.85	8	15	0.876667	0.976667	0.1	0.0157705	0.329448	1	8738423	8738781	AluSc8	+	S	c8	27	0.85	4	0.24	0.37	0	0	0.35	1965	81	11	150	359	15	183	8.36	50.97	0.65
5394	1	4	0.83	5	0.94	4	1	4	1	4	1	5	6	1	0.923333	-0.0766667	0.101977	0.503913	1	8746040	8746341	AluJb	-	J	b	0	0	8	0.38	0.41	9	0.37	0.45	1974	169	0	7	302	6	150	3.97	49.67	0.33
5396	0.88	4	0.88	4	0.79	4	0.78	4	0.85	4	0.86	4	4	0.83	0.85	0.02	0.705675	0.920535	1	8748219	8748342	AluJb	+	J	b	13	0.69	3	0.24	0.32	5	0.19	0.46	924	195	13	93	124	4	58	6.45	46.77	0.59
5401	1	7	1	7	0.93	7	1	7	0.93	7	0.95	7	8	0.96	0.976667	0.0166667	0.544236	0.840035	1	8752404	8752707	AluSx1	-	S	x1	0	0	5	0.29	0.38	7	0.5	0.33	2173	128	3	7	304	8	150	5.26	49.34	0.44
5416	1	3	0.89	3	1	4	1	3	0.94	3	1	3	4	0.98	0.963333	-0.0166667	0.825225	0.968528	1	8769344	8769475	FLAM_C	-	FLAM_C	None	0	0	13	0.6	0.42	1	0.06	0.36	828	144	15	15	132	4	66	6.06	50	0.5
5430	0.71	7	1	7	0.83	7	0.97	8	0.96	8	1	3	12	0.976667	0.846667	-0.13	0.255588	0.701306	1	8784624	8784907	AluSg	+	S	g	20	0.9	2	0.19	0.29	8	0.59	0.33	2185	92	56	0	284	12	157	8.45	55.28	0.55
5432	0.7	5	0.7	5	0.68	4	0.57	5	0.25	4	0.61	6	16	0.476667	0.693333	0.216667	0.137152	0.550549	1	8786202	8786511	AluSg	-	S	g	0	0	1	0.08	0.32	4	0.21	0.4	2475	81	10	10	310	16	160	10.32	51.61	0.78
5435	1	4	0.91	4	1	5	0.98	6	1	4	1	5	14	0.993333	0.97	-0.0233333	0.517762	0.82393	1	8787543	8787850	AluSc	-	S	c	0	0	17	0.49	0.53	5	0.24	0.42	2369	97	3	0	308	14	163	9.09	52.92	0.65
5451	0.83	3	0.92	4	1	3	1	3	0.87	3	0.77	3	4	0.88	0.916667	0.0366667	0.810969	0.962786	1	8802610	8802945	AluJb	+	J	b	19	1	2	0.11	0.38	5	0.25	0.4	1793	119	0	140	336	4	167	2.38	49.7	0.19
5454	0.92	3	1	4	0.71	4	1	3	0.73	4	0.75	4	5	0.826667	0.876667	0.05	0.779577	0.951626	1	8805847	8806142	AluJo	+	J	o	19	0.79	6	0.32	0.41	1	0.06	0.36	1747	189	17	0	296	5	148	3.38	50	0.27
5456	0.75	4	0.87	8	0.89	9	0.92	6	0.75	6	0.83	6	12	0.833333	0.836667	0.00333333	0.983023	1	1	8807846	8808136	AluSz	-	S	z	0	0	3	0.17	0.37	7	0.37	0.4	2246	96	0	21	291	12	159	8.25	54.64	0.57
5459	1	4	1	6	1	7	0.6	5	1	6	1	4	9	0.866667	1	0.133333	0.308736	0.723448	1	8809929	8810231	AluSz6	+	S	z6	22	0.95	4	0.22	0.39	4	0.19	0.42	2153	142	3	0	303	9	152	5.94	50.17	0.47
5465	0.92	6	1	3	1	4	1	4	1	3	1	4	7	1	0.973333	-0.0266667	0.349605	0.723747	1	8818151	8818439	AluSg	-	S	g	0	0	3	0.21	0.34	6	0.31	0.39	2079	114	14	3	289	7	155	4.84	53.63	0.35
5466	1	3	1	5	0.98	4	0.83	5	0.88	4	1	5	6	0.903333	0.993333	0.09	0.123504	0.5284	1	8818447	8818698	AluJo	-	J	o	0	0	9	0.35	0.46	1	0.07	0.33	1597	135	36	32	252	6	117	4.76	46.43	0.45
5472	0.56	3	0.97	8	0.88	7	1	4	1	5	0.9	5	9	0.966667	0.803333	-0.163333	0.143364	0.557184	1	8823411	8823714	AluSz	+	S	z	21	0.86	2	0.14	0.34	13	0.4	0.51	2155	135	0	7	304	9	157	5.92	51.64	0.44
5530	1	4	1	6	1	4	1	5	1	4	0.6	5	10	0.866667	1	0.133333	0.308736	0.723448	1	8859051	8859352	AluSq2	-	S	q2	0	0	11	0.33	0.52	5	0.26	0.39	2241	109	10	0	302	10	160	6.62	52.98	0.48
5540	0.94	6	1	3	1	5	1	5	1	6	1	8	8	1	0.98	-0.02	0.367384	0.72739	1	8865056	8865229	AluSx1	-	S	x1	14	0.36	4	0.21	0.39	10	0.37	0.46	1211	103	35	11	174	8	87	9.2	50	0.74
5547	1	3	0.95	4	0.96	3	1	4	0.94	4	0.72	3	4	0.886667	0.97	0.0833333	0.47762	0.796614	1	8868057	8868229	AluJb	+	J	b	23	1	1	0.06	0.37	2	0.14	0.35	1023	168	0	23	173	4	84	4.62	48.55	0.39
5550	1	3	0.96	5	0.89	3	1	4	0.89	3	0.71	7	11	0.866667	0.95	0.0833333	0.542664	0.839202	1	8870082	8870358	AluSx1	-	S	x1	0	0	0	0	0.31	2	0.1	0.4	2094	101	22	0	277	11	157	7.94	56.68	0.5
5553	0.85	3	0.85	5	1	5	0.97	4	0.91	7	0.84	6	9	0.906667	0.9	-0.00666667	0.843902	0.976312	1	8872425	8872710	AluSz	+	S	z	5	1	7	0.33	0.41	1	0.09	0.32	2171	119	3	0	286	9	150	6.29	52.45	0.46
5568	0.94	6	1	6	0.93	5	0.94	6	0.94	6	0.86	4	11	0.913333	0.956667	0.0433333	0.263874	0.710357	1	8885547	8885853	AluSq2	+	S	q2	4	1	18	0.62	0.48	11	0.35	0.51	2137	85	0	62	307	11	169	7.17	55.05	0.47
5569	0.75	4	0.98	4	1	4	1	4	0.76	6	1	3	11	0.92	0.91	-0.01	0.862042	0.981397	1	8886625	8886940	AluSg	+	S	g	30	0.87	7	0.23	0.5	7	0.24	0.48	2354	98	0	19	316	11	162	6.96	51.27	0.54
5579	1	4	0.97	6	0.34	6	0.72	6	0.75	8	0.87	7	9	0.78	0.77	-0.01	0.454758	0.780407	1	8890800	8891090	AluSz6	+	S	z6	20	1	8	0.34	0.44	6	0.21	0.48	1997	86	28	21	291	9	148	6.19	50.86	0.48
5584	0.92	3	1	3	0.58	4	0.83	3	0.94	3	0.9	3	4	0.89	0.833333	-0.0566667	0.819104	0.966672	1	8893007	8893323	AluJb	+	J	b	27	0.81	10	0.38	0.46	9	0.43	0.42	1492	197	0	35	317	4	150	2.52	47.32	0.23
5592	1	4	1	4	0.88	4	0.78	3	0.93	3	0.81	3	4	0.84	0.96	0.12	0.0745387	0.500778	1	8895526	8895676	AluJb	+	J	b	13	0.62	7	0.23	0.5	11	0.41	0.46	1586	177	7	52	151	4	74	5.3	49.01	0.46
5613	0.75	4	0	4	0.09	5	0	4	0.5	4	0.25	4	10	0.25	0.28	0.03	0.984277	1	1	8908465	8908774	AluSx1	+	S	x1	28	0.68	5	0.13	0.55	12	0.29	0.58	2253	107	0	0	310	10	163	6.45	52.58	0.47
5623	1	4	1	4	0.95	5	0.92	9	0.9	10	0.72	9	10	0.846667	0.983333	0.136667	0.0238453	0.379918	1	8913891	8914098	AluJo	+	J	o	16	0.88	24	0.82	0.49	9	0.29	0.5	1016	120	433	0	208	10	116	9.62	55.77	0.62
5646	0.95	5	0.88	4	0.97	5	1	4	0.97	7	0.97	6	10	0.98	0.933333	-0.0466667	0.134739	0.546395	1	8927612	8927888	AluY	-	Y	None	0	0	8	0.27	0.49	4	0.18	0.42	1855	94	94	4	277	10	149	7.22	53.79	0.5
5653	0.92	6	0	3	0.33	3	1	6	1	4	0.75	4	7	0.916667	0.416667	-0.5	0.0798991	0.500778	1	8936904	8937051	AluSx	-	S	x	1	1	16	0.65	0.45	28	0.74	0.55	1885	94	66	38	148	7	78	9.46	52.7	0.68
5655	0.38	8	0	7	0	5	0.42	7	0.56	8	0.36	7	9	0.446667	0.126667	-0.32	0.0554846	0.484759	1	8937311	8937450	AluSx	-	S	x	0	0	27	0.79	0.52	24	0.68	0.53	1885	94	66	38	140	9	81	12.86	57.86	0.77
5656	0.14	7	0	9	0	10	0.11	9	0.17	9	0.14	11	19	0.14	0.0466667	-0.0933333	0.0844069	0.500778	1	8937633	8937950	AluSp	+	S	p	31	0.77	24	0.63	0.55	36	0.77	0.61	2020	60	19	82	318	19	172	11.95	54.09	0.82
5661	1	4	1	3	0.89	3	1	3	1	3	1	3	9	1	0.963333	-0.0366667	0.335911	0.723448	1	8942514	8942819	AluY	-	Y	None	0	0	9	0.34	0.47	13	0.44	0.49	2310	92	3	0	306	9	153	5.88	50	0.48
5685	1	7	0.77	4	1	4	1	3	0.94	7	0.92	4	14	0.953333	0.923333	-0.03	0.869071	0.983439	1	8955553	8955851	AluSc8	+	S	c8	29	0.79	5	0.24	0.41	6	0.25	0.45	2198	110	37	0	299	14	156	9.36	52.17	0.69
5707	1	4	0.94	8	0.8	10	0.94	6	1	7	1	5	12	0.98	0.913333	-0.0666667	0.33579	0.723448	1	8973068	8973402	AluSz	-	S	z	0	0	5	0.23	0.42	10	0.34	0.49	2091	119	0	69	335	12	167	7.16	49.85	0.58
5710	0.77	7	0.75	6	0.66	8	0.72	5	0.83	3	1	6	10	0.85	0.726667	-0.123333	0.232902	0.674373	1	8974935	8975229	AluSx3	+	S	x3	21	0.67	10	0.42	0.44	2	0.12	0.36	1967	132	20	7	295	10	153	6.78	51.86	0.51
5732	0.97	6	1	3	0.75	4	1	4	1	6	1	3	11	1	0.906667	-0.0933333	0.160093	0.581659	1	8990789	8991087	AluSq2	-	S	q2	0	0	6	0.38	0.36	6	0.25	0.44	2329	97	0	0	299	11	162	7.36	54.18	0.51
5749	0.93	3	0.93	3	1	3	1	3	1	3	0.82	3	3	0.94	0.953333	0.0133333	0.787357	0.954921	1	8997709	8997853	AluJb	-	J	b	0	0	11	0.32	0.52	3	0.13	0.42	1916	137	0	52	145	3	73	4.14	50.34	0.33
5753	0.9	3	0.73	3	0.67	3	1	3	0.93	3	0.67	3	3	0.866667	0.766667	-0.1	0.273478	0.720691	1	9002905	9003082	AluJr	+	J	r	30	0.77	5	0.16	0.5	7	0.23	0.5	921	112	28	107	178	3	100	3.37	56.18	0.22
5779	0.58	3	0.29	4	0.13	3	1	4	0.83	3	0.53	4	5	0.786667	0.333333	-0.453333	0.0702167	0.500778	1	9017726	9018005	AluJo	+	J	o	13	0.69	17	0.51	0.52	8	0.26	0.49	1622	186	0	32	280	5	143	3.57	51.07	0.28
5786	1	3	0.67	3	1	3	1	4	1	4	1	4	8	1	0.89	-0.11	0.311311	0.723448	1	9024296	9024604	AluSc	-	S	c	0	0	7	0.24	0.52	12	0.35	0.54	2254	129	3	3	309	8	165	5.18	53.4	0.37
5787	0.7	5	0.81	3	0.7	5	1	5	0.83	6	0.88	4	12	0.903333	0.736667	-0.166667	0.114482	0.519078	1	9025021	9025324	AluSx	+	S	x	22	0.68	15	0.46	0.54	6	0.27	0.43	2195	128	0	0	304	12	164	7.89	53.95	0.55
5796	1	4	1	5	0.5	3	1	4	0.94	4	1	3	7	0.98	0.833333	-0.146667	0.553969	0.846049	1	9030561	9030859	AluSz	-	S	z	0	0	7	0.29	0.44	10	0.32	0.5	2139	120	27	0	299	7	155	4.68	51.84	0.35
5798	1	4	0.79	4	0.67	3	0.75	4	0.81	4	1	4	5	0.853333	0.82	-0.0333333	0.909695	0.994988	1	9032109	9032409	AluJr	-	J	r	0	0	11	0.38	0.49	16	0.55	0.48	2006	159	0	10	301	5	156	3.32	51.83	0.26
5799	0.67	3	0.55	5	0.42	4	1	4	1	3	0.8	5	15	0.933333	0.546667	-0.386667	0.0190171	0.351699	1	9032452	9032773	AluY	+	Y	None	32	0.81	5	0.22	0.44	8	0.34	0.44	2321	81	0	40	322	15	179	9.32	55.59	0.61
5824	0.68	3	0.45	4	0.56	3	0.87	4	0.95	4	0.88	4	6	0.9	0.563333	-0.336667	0.00851316	0.270635	1	9050378	9050677	AluSx1	-	S	x1	0	0	5	0.13	0.58	0	0	0.39	2018	123	30	17	300	6	155	4	51.67	0.31
5842	0.73	4	0.67	6	0.8	5	1	4	0.58	6	0.6	5	8	0.726667	0.733333	0.00666667	0.580204	0.859933	1	9061479	9061775	AluJb	-	J	b	0	0	10	0.31	0.52	6	0.2	0.5	2108	135	14	0	297	8	153	5.39	51.52	0.41
5845	0.5	4	0.62	4	0.42	4	0.67	3	0.48	5	0.63	4	6	0.593333	0.513333	-0.08	0.485677	0.801769	1	9065639	9065870	AluSz	+	S	z	35	0.83	14	0.45	0.5	13	0.33	0.57	1601	121	103	0	232	6	109	5.17	46.98	0.47
5849	0.26	7	0.1	6	0.26	5	0.43	7	0.65	7	0.78	6	9	0.62	0.206667	-0.413333	0.0205748	0.362361	1	9067794	9067961	AluSx3	-	S	x3	0	0	14	0.32	0.59	11	0.29	0.55	1265	89	24	0	168	9	96	10.71	57.14	0.67
5852	0.78	6	0.83	3	0.83	6	0.75	5	0.77	5	1	3	9	0.84	0.813333	-0.0266667	0.46423	0.786623	1	9070405	9070710	AluSq	-	S	q	0	0	15	0.36	0.58	5	0.14	0.55	2398	95	3	0	306	9	162	5.88	52.94	0.43
5856	1	4	0.92	6	0.75	4	1	4	1	6	1	4	6	1	0.89	-0.11	0.0958053	0.500778	1	9073255	9073388	AluSz	-	S	z	0	0	2	0.08	0.44	14	0.35	0.57	1060	82	0	8	134	6	72	8.96	53.73	0.62
5858	0.84	5	0.8	5	1	4	0.73	5	0.53	5	0.54	4	6	0.6	0.88	0.28	0.0769804	0.500778	1	9075780	9076080	AluJo	-	J	o	0	0	11	0.32	0.52	9	0.31	0.49	1818	173	27	23	301	6	146	3.99	48.5	0.35
5874	0.92	4	1	4	0.62	3	1	4	1	4	0.78	3	5	0.926667	0.846667	-0.08	0.523587	0.82778	1	9088400	9088633	AluJb	-	J	b	0	0	3	0.11	0.47	6	0.17	0.53	1342	184	0	26	234	5	116	4.27	49.57	0.35
5889	1	4	0.43	5	0.75	4	0.33	3	0.62	4	0.54	4	13	0.496667	0.726667	0.23	0.22285	0.662366	1	9103783	9104080	AluSq2	-	S	q2	0	0	4	0.14	0.48	4	0.15	0.46	2503	60	0	3	298	13	167	8.72	56.04	0.56
5897	0.36	7	0.52	8	0.47	10	0.78	10	0.61	9	0.77	10	12	0.72	0.45	-0.27	0.0397404	0.438105	1	9109501	9109788	AluSx	+	S	x	30	0.83	7	0.33	0.41	11	0.38	0.48	1874	104	94	14	288	12	160	8.33	55.56	0.54
5929	1	5	0.67	3	0.92	4	1	3	1	5	0.87	3	7	0.956667	0.863333	-0.0933333	0.420109	0.759662	1	9126292	9126593	AluJb	-	J	b	0	0	6	0.24	0.45	5	0.19	0.46	1799	169	3	23	302	7	165	4.64	54.64	0.32
5930	0.8	5	0.92	4	0.9	4	0.92	4	1	4	1	4	5	0.973333	0.873333	-0.1	0.05178	0.472796	1	9126758	9127068	AluJr	+	J	r	32	0.84	7	0.26	0.47	16	0.36	0.6	1941	167	10	6	311	5	160	3.22	51.45	0.24
5932	1	3	1	3	1	3	1	3	1	3	1	5	9	1	1	0	1	1	1	9127967	9128268	AluSx	+	S	x	20	1	17	0.53	0.51	7	0.25	0.47	2472	86	0	0	302	9	162	5.96	53.64	0.42
5937	0.88	4	1	7	0.8	5	1	3	1	6	0.83	5	12	0.943333	0.893333	-0.05	0.486441	0.802339	1	9131187	9131462	AluSx1	+	S	x1	0	0	8	0.28	0.48	37	0.65	0.68	2242	91	0	0	276	12	163	8.7	59.06	0.5
5987	0.9	5	0.97	5	0.94	5	0.94	5	0.95	5	0.87	5	9	0.92	0.936667	0.0166667	0.628235	0.884067	1	9174098	9174404	AluSx	+	S	x	19	1	8	0.22	0.53	13	0.38	0.53	2059	117	10	29	307	9	163	5.86	53.09	0.42
6004	0.8	5	0.91	7	0.92	8	0.82	7	0.9	5	1	4	14	0.906667	0.876667	-0.03	0.462639	0.785158	1	9190546	9190845	AluSx	-	S	x	0	0	8	0.46	0.38	6	0.3	0.4	2201	103	3	10	300	14	170	9.33	56.67	0.59
6028	0.72	3	0.92	3	0.88	3	1	3	0.71	3	0.93	3	8	0.88	0.84	-0.04	0.427178	0.765	1	9202619	9202930	AluSz	-	S	z	0	0	9	0.35	0.47	10	0.37	0.53	2089	103	26	32	312	8	158	5.13	50.64	0.41
6032	1	3	0.94	3	1	3	1	3	1	3	1	3	5	1	0.98	-0.02	0.367384	0.72739	1	9204364	9204669	AluJb	+	J	b	26	0.92	7	0.24	0.48	10	0.27	0.55	2043	141	13	7	306	5	159	3.27	51.96	0.24
6035	1	7	0.74	7	1	6	0.72	6	1	7	0.84	7	9	0.853333	0.913333	0.06	0.509542	0.818196	1	9206472	9206757	AluSz	+	S	z	7	1	7	0.2	0.54	9	0.27	0.52	1888	119	28	21	286	9	151	6.29	52.8	0.46
6041	1	4	1	6	1	4	0.96	6	0.92	6	1	6	6	0.96	1	0.04	0.116371	0.520401	1	9211937	9212181	AluJr4	+	J	r4	11	0.91	15	0.4	0.56	11	0.39	0.48	1571	127	49	16	245	6	133	4.9	54.29	0.34
6094	0.29	5	0.6	4	0.6	5	0.49	3	0.32	3	0.39	4	5	0.4	0.496667	0.0966667	0.498542	0.810951	1	9253983	9254286	AluJb	-	J	b	0	0	3	0.15	0.4	2	0.1	0.4	1531	161	30	69	304	5	162	3.29	53.29	0.23
6098	1	5	0.9	5	1	6	1	5	0.73	4	1	4	6	0.91	0.966667	0.0566667	0.766095	0.9478	1	9255380	9255641	AluJb	+	J	b	12	1	4	0.17	0.44	9	0.34	0.46	1833	141	0	4	262	6	140	4.58	53.44	0.32
6109	0.71	7	0.42	6	0.72	3	0.89	9	1	7	0.67	3	10	0.853333	0.616667	-0.236667	0.127918	0.535089	1	9269234	9269534	AluSz6	-	S	z6	0	0	14	0.54	0.46	12	0.29	0.6	1996	156	3	0	301	10	158	6.64	52.49	0.48
6119	1	3	0.94	3	0.83	6	1	3	0.92	6	1	5	13	0.973333	0.923333	-0.05	0.418188	0.758488	1	9275988	9276308	AluSx	+	S	x	6	0.83	11	0.34	0.51	10	0.3	0.52	2017	87	3	34	321	13	175	8.1	54.52	0.55
6142	0.96	3	0.76	3	0.49	3	0.92	3	0.86	3	1	3	3	0.926667	0.736667	-0.19	0.232804	0.674245	1	9289781	9290056	AluJo	+	J	o	30	0.83	7	0.25	0.48	11	0.36	0.5	1465	192	112	0	276	3	136	2.17	49.28	0.18
6152	0.83	6	0.77	7	0.88	4	0.87	7	0.8	5	0.8	6	9	0.823333	0.826667	0.00333333	0.931104	1	1	9295689	9295968	AluJb	-	J	b	0	0	22	0.59	0.55	14	0.51	0.47	1815	164	0	4	280	9	161	6.43	57.5	0.39
6154	0.94	8	0.94	9	1	9	1	11	1	7	0.94	9	11	0.976667	0.96	-0.0166667	0.48361	0.800797	1	9296439	9296747	AluSz	+	S	z	20	1	13	0.49	0.46	7	0.3	0.44	2046	107	16	39	309	11	165	7.12	53.4	0.5
6166	0.94	4	1	4	0.8	5	0.75	5	0.88	4	1	5	5	0.876667	0.913333	0.0366667	0.790154	0.956365	1	9308578	9308706	FLAM_A	+	FLAM_A	None	15	0.87	18	0.39	0.61	13	0.27	0.63	780	163	23	0	129	5	73	7.75	56.59	0.5
6178	0.68	8	0.95	7	0.75	4	0.63	7	0.67	9	0.64	8	12	0.646667	0.793333	0.146667	0.196296	0.629835	1	9326884	9327178	AluSx1	-	S	x1	0	0	7	0.24	0.49	20	0.43	0.61	2159	105	17	0	295	12	165	8.14	55.93	0.53
6181	1	4	1	5	1	4	1	3	0.83	6	1	3	11	0.943333	1	0.0566667	0.323295	0.723448	1	9334314	9334605	AluSx1	+	S	x1	10	1	6	0.49	0.31	5	0.21	0.44	2247	103	0	3	292	11	162	7.53	55.48	0.5
6214	0.84	8	0.93	7	0.96	5	0.97	5	0.92	8	0.72	6	8	0.87	0.91	0.04	0.825917	0.968528	1	9372075	9372385	AluJr	-	J	r	0	0	11	0.38	0.49	14	0.52	0.47	1436	119	19	158	311	8	157	5.14	50.48	0.41
6222	0.38	4	0.62	6	0.37	6	0.7	5	0.67	6	0.61	5	6	0.66	0.456667	-0.203333	0.116443	0.520407	1	9377542	9377841	AluJb	-	J	b	0	0	8	0.28	0.5	21	0.5	0.59	1563	170	50	47	300	6	154	4	51.33	0.3
6228	1	5	0.8	5	1	8	0.92	6	0.94	8	0.62	4	13	0.826667	0.933333	0.106667	0.210938	0.648088	1	9390245	9390526	AluSq2	+	S	q2	2	1	9	0.36	0.46	13	0.66	0.41	2094	85	32	21	282	13	158	9.22	56.03	0.6
6238	0.6	5	0.38	4	0.94	4	0.53	5	0.6	5	1	4	13	0.71	0.64	-0.07	0.613999	0.877904	1	9401762	9402060	AluSp	-	S	p	0	0	8	0.21	0.55	11	0.29	0.56	2442	74	3	0	299	13	162	8.7	54.18	0.6
6257	1	4	0.61	5	0.9	5	0.88	4	0.93	5	0.85	4	13	0.886667	0.836667	-0.05	0.790494	0.956468	1	9430867	9431157	AluSc	+	S	c	10	0.9	8	0.26	0.5	12	0.33	0.55	2327	65	0	14	291	13	167	8.93	57.39	0.54
6260	0.58	4	0.62	4	0.15	4	0.68	5	0.69	6	0.6	5	10	0.656667	0.45	-0.206667	0.228319	0.669136	1	9434446	9434774	AluSz6	+	S	z6	26	0.69	6	0.21	0.48	6	0.21	0.48	2085	125	0	64	329	10	167	6.08	50.76	0.47
6283	1	5	0.73	5	0.38	4	1	4	0.64	4	0.75	4	7	0.796667	0.703333	-0.0933333	0.82912	0.969524	1	9451471	9451757	AluSx1	+	S	x1	15	0.93	4	0.15	0.46	11	0.34	0.52	2068	125	28	0	287	7	147	4.88	51.22	0.37
6293	1	6	0.58	6	0.93	5	0.75	10	1	6	0.8	5	13	0.85	0.836667	-0.0133333	0.926689	0.999939	1	9461351	9461666	AluSz	+	S	z	23	0.87	13	0.27	0.62	13	0.36	0.54	2218	101	0	35	316	13	168	8.23	53.16	0.59
6335	1	3	1	5	0.75	6	0.88	6	1	7	0.96	4	13	0.946667	0.916667	-0.03	0.892895	0.989968	1	9488104	9488399	AluSz	-	S	z	0	0	7	0.28	0.45	17	0.6	0.48	2089	105	54	0	296	13	167	8.78	56.42	0.55
6350	1	4	0.56	3	1	4	0.95	3	0.92	3	0.96	3	6	0.943333	0.853333	-0.09	0.832616	0.971402	1	9502120	9502444	AluJb	+	J	b	17	1	15	0.39	0.56	6	0.27	0.42	1962	108	9	89	325	6	165	3.69	50.77	0.29
6354	0.79	4	0.75	4	0.67	6	1	5	0.83	6	0.5	5	11	0.776667	0.736667	-0.04	0.437573	0.772306	1	9505321	9505630	AluSz	+	S	z	29	0.72	10	0.48	0.41	8	0.42	0.39	2267	113	3	0	310	11	165	7.1	53.23	0.51
6357	0.72	6	0.79	7	0.61	6	1	7	0.86	7	0.87	7	11	0.91	0.706667	-0.203333	0.0829797	0.500778	1	9507525	9507835	AluSq	-	S	q	0	0	7	0.22	0.51	7	0.21	0.52	2242	100	0	26	311	11	165	7.07	53.05	0.5
6370	0.9	3	0.67	3	0.67	3	0.58	3	1	5	0.89	3	6	0.823333	0.746667	-0.0766667	0.383216	0.736264	1	9521457	9521731	AluJb	+	J	b	16	0.81	6	0.31	0.4	5	0.27	0.38	1737	149	87	4	275	6	145	4.36	52.73	0.32
6405	0.83	4	0.69	4	0.9	4	1	4	0.83	4	1	4	4	0.943333	0.806667	-0.136667	0.0861729	0.500778	1	9547678	9547849	AluJb	-	J	b	0	0	8	0.24	0.51	7	0.24	0.49	1041	164	0	6	172	4	92	4.65	53.49	0.34
6421	0.44	3	0.6	5	0.7	5	0.67	6	1	5	0.62	8	12	0.763333	0.58	-0.183333	0.244846	0.688087	1	9554578	9554872	AluSz6	+	S	z6	15	0.87	5	0.25	0.4	13	0.29	0.61	2104	132	0	0	295	12	154	8.14	52.2	0.6
6426	1	4	0.92	5	0.85	5	1	5	0.79	7	1	5	8	0.93	0.923333	-0.00666667	0.65693	0.899373	1	9557841	9558131	AluSg	-	S	g	0	0	5	0.18	0.48	10	0.45	0.42	2233	89	58	0	291	8	146	5.5	50.17	0.44
6427	1	6	0.68	8	0.8	5	0.87	5	0.91	7	0.89	6	9	0.89	0.826667	-0.0633333	0.899112	0.992197	1	9558338	9558642	AluSz6	-	S	z6	0	0	11	0.46	0.44	2	0.08	0.44	2020	161	7	0	305	9	148	5.9	48.52	0.5
6438	0.92	3	0.8	5	0.78	3	0.77	5	1	6	0.73	5	7	0.833333	0.833333	0	0.626834	0.883309	1	9564910	9565221	AluSx	+	S	x	32	0.94	9	0.22	0.57	9	0.26	0.53	2309	106	6	6	312	7	156	4.49	50	0.36
6441	0.83	5	1	3	0.56	3	0.61	3	1	3	0.33	3	8	0.646667	0.796667	0.15	0.713667	0.924717	1	9566763	9567058	AluSx1	+	S	x1	23	0.87	19	0.53	0.54	6	0.22	0.47	2245	101	27	0	296	8	153	5.41	51.69	0.41
6476	1	8	1	9	0.86	7	1	6	0.88	8	1	6	12	0.96	0.953333	-0.00666667	0.960523	1	1	9584483	9584758	AluSc	-	S	c	0	0	7	0.24	0.48	8	0.3	0.46	1904	109	69	4	276	12	139	8.7	50.36	0.69
6482	1	5	0.92	4	0.88	5	1	3	1	6	1	5	8	1	0.933333	-0.0666667	0.088979	0.500778	1	9587253	9587407	AluY	+	Y	None	0	0	5	0.16	0.51	13	0.42	0.5	1352	58	0	0	155	8	87	10.32	56.13	0.67
6488	0.88	4	1	4	0.83	6	1	4	0.94	8	0.95	5	10	0.963333	0.903333	-0.06	0.513038	0.820993	1	9589948	9590232	AluSx1	-	S	x1	0	0	10	0.28	0.53	5	0.14	0.53	1948	144	0	7	285	10	155	7.02	54.39	0.48
6504	0.71	5	0.66	7	0.61	7	0.97	4	0.8	6	0.63	7	7	0.8	0.66	-0.14	0.226951	0.667302	1	9594905	9595205	AluJb	-	J	b	0	0	7	0.27	0.46	6	0.24	0.45	1583	206	30	7	301	7	136	4.65	45.18	0.46
6514	0.58	8	0.77	14	0.86	19	0.78	17	0.84	15	0.9	16	19	0.84	0.736667	-0.103333	0.329275	0.723448	1	9598796	9599080	AluSx	-	S	x	0	0	4	0.17	0.44	46	1.02	0.61	1933	133	0	14	285	19	169	13.33	59.3	0.76
6534	1	4	0.91	4	0.96	5	1	4	0.83	4	1	3	5	0.943333	0.956667	0.0133333	0.840154	0.974634	1	9610746	9611035	AluSx	-	S	x	0	0	6	0.4	0.35	5	0.23	0.42	1737	176	3	23	290	5	158	3.45	54.48	0.23
6548	1	4	0.94	4	1	8	0.29	7	0.86	7	0.54	4	13	0.563333	0.98	0.416667	0.00937651	0.279767	1	9620385	9620630	AluY	+	Y	None	9	1	13	0.47	0.47	4	0.3	0.33	1986	85	0	0	246	13	134	10.57	54.47	0.73
6549	1	9	1	3	1	7	0.6	5	1	5	0.6	5	15	0.733333	1	0.266667	0.0704483	0.500778	1	9621006	9621300	AluSc8	-	S	c8	0	0	7	0.49	0.34	4	0.24	0.37	2234	71	30	10	295	15	162	10.17	54.92	0.68
6568	0.8	5	1	4	1	5	1	4	1	5	0.87	5	5	0.956667	0.933333	-0.0233333	0.895291	0.991122	1	9631682	9631998	AluJb	-	J	b	0	0	15	0.47	0.51	10	0.48	0.41	1933	167	0	16	317	5	156	3.15	49.21	0.26
6575	0.97	5	1	5	0.87	5	1	5	1	5	0.96	6	8	0.986667	0.946667	-0.04	0.388445	0.74053	1	9637234	9637568	AluSz	+	S	z	32	0.81	7	0.33	0.42	9	0.29	0.52	1606	104	66	134	335	8	175	4.78	52.24	0.36
6580	1	8	0.96	8	0.97	6	0.94	6	1	8	1	5	11	0.98	0.976667	-0.00333333	0.762535	0.946097	1	9641972	9642271	AluSz6	-	S	z6	0	0	6	0.27	0.42	12	0.6	0.4	2020	120	33	13	300	11	159	7.33	53	0.53
6584	1	3	0.93	3	1	4	1	3	0.92	3	1	3	4	0.973333	0.976667	0.00333333	0.959563	1	1	9644768	9645052	AluJr4	-	J	r4	0	0	10	0.35	0.48	4	0.26	0.35	1609	196	3	7	285	4	135	2.81	47.37	0.25
6585	0.75	4	0.93	5	1	4	0.92	4	0.8	5	0.67	3	6	0.796667	0.893333	0.0966667	0.274579	0.721786	1	9645565	9645846	AluSq2	+	S	q2	4	1	4	0.25	0.36	8	0.3	0.46	1661	152	11	28	282	6	151	4.26	53.55	0.31
6611	0.92	6	0.8	5	1	3	0.83	6	1	3	0.75	4	10	0.86	0.906667	0.0466667	0.77739	0.950613	1	9671253	9671555	AluSz	-	S	z	0	0	19	0.49	0.56	11	0.26	0.58	2315	109	0	0	303	10	162	6.6	53.47	0.47
6628	1	3	0.72	3	0	4	0.89	3	0.78	3	1	3	19	0.89	0.573333	-0.316667	0.384416	0.737241	1	9683337	9683646	AluYa5	+	Y	a5	29	0.97	14	0.5	0.48	5	0.19	0.46	2814	19	0	0	310	19	172	12.26	55.48	0.8
6630	1	5	1	5	0.83	4	1	6	0.92	6	0.75	6	14	0.89	0.943333	0.0533333	0.517282	0.823667	1	9684706	9685031	AluY	-	Y	None	0	0	6	0.19	0.51	3	0.13	0.43	2315	49	0	83	326	14	172	8.59	52.76	0.62
6636	1	5	1	5	0.97	5	0.79	5	1	5	0.78	5	5	0.856667	0.99	0.133333	0.13809	0.551932	1	9688027	9688096	AluJb	+	J	b	0	0	17	0.41	0.58	13	0.45	0.48	493	100	14	0	70	5	46	14.29	65.71	0.71
6645	0.55	4	0.49	5	0.45	5	1	5	0.84	5	0.76	7	9	0.866667	0.496667	-0.37	0.0493579	0.466746	1	9693394	9693665	AluSq2	-	S	q2	0	0	14	0.47	0.49	5	0.19	0.46	2122	92	0	4	272	9	153	6.62	56.25	0.42
6655	0.92	5	0.78	6	0.9	5	1	7	1	6	0.95	5	8	0.983333	0.866667	-0.116667	0.0222251	0.371193	1	9698836	9699124	AluJb	-	J	b	0	0	18	0.5	0.54	6	0.22	0.46	1886	152	31	0	289	8	162	5.54	56.06	0.36
6682	0.33	3	0.37	6	0.25	4	0.4	4	0.25	4	0.83	4	9	0.493333	0.316667	-0.176667	0.345261	0.723747	1	9714836	9715147	AluSz	+	S	z	23	0.96	15	0.41	0.54	8	0.24	0.51	2275	106	0	22	312	9	155	5.77	49.68	0.49
6683	0.81	5	0.5	6	0.63	5	0.68	7	0.97	8	0.81	6	12	0.82	0.646667	-0.173333	0.205618	0.641708	1	9715744	9716054	AluSx	-	S	x	0	0	10	0.31	0.51	6	0.27	0.44	2292	125	3	0	311	12	161	7.72	51.77	0.58
6691	0.74	7	0.38	10	0.5	5	0.9	5	0.7	5	0.78	6	12	0.793333	0.54	-0.253333	0.0939451	0.500778	1	9719976	9720269	AluSp	-	S	p	0	0	6	0.24	0.45	8	0.31	0.45	2214	99	14	0	294	12	160	8.16	54.42	0.56
6699	0.92	4	0.75	5	0.21	4	0.43	5	1	5	0.87	3	9	0.766667	0.626667	-0.14	0.432192	0.768452	1	9722741	9723045	AluSx	-	S	x	0	0	14	0.45	0.5	12	0.33	0.54	2232	128	0	0	305	9	159	5.9	52.13	0.44
6715	1	5	0.89	3	0.97	5	1	3	0.93	5	1	4	5	0.976667	0.953333	-0.0233333	0.578031	0.858622	1	9729598	9729681	AluJo	-	J	o	0	0	3	0.12	0.45	8	0.29	0.47	591	119	24	0	84	5	51	11.9	60.71	0.65
6723	0.92	3	0.58	3	0.83	3	0.75	4	0.86	3	1	4	4	0.87	0.776667	-0.0933333	0.382445	0.735821	1	9732484	9732781	AluJo	-	J	o	0	0	9	0.31	0.49	7	0.32	0.42	1904	151	17	7	298	4	151	2.68	50.67	0.21
6725	1	7	0.9	7	0.89	6	0.95	7	1	7	1	7	10	0.983333	0.93	-0.0533333	0.282881	0.723448	1	9733313	9733618	AluSz	-	S	z	0	0	6	0.26	0.43	12	0.41	0.49	2013	154	3	7	306	10	149	6.54	48.69	0.56
6726	0.33	6	0.26	5	0.82	5	0.97	4	0.83	4	1	5	6	0.933333	0.47	-0.463333	0.0249635	0.384467	1	9733619	9733760	AluJb	-	J	b	0	0	14	0.49	0.48	8	0.27	0.49	1558	168	24	20	142	6	76	8.45	53.52	0.59
6731	0.67	3	1	3	1	3	1	3	1	3	0.5	3	21	0.833333	0.89	0.0566667	0.897734	0.991721	1	9735162	9735471	AluY	+	Y	None	28	0.93	8	0.3	0.46	5	0.14	0.54	2715	32	0	3	310	21	175	13.55	56.45	0.86
6745	0.53	6	0.4	6	0.78	6	0.64	6	0.68	5	0.83	6	11	0.716667	0.57	-0.146667	0.330014	0.723448	1	9741472	9741767	AluSx	-	S	x	0	0	2	0.05	0.54	7	0.24	0.48	2046	91	44	27	296	11	162	7.43	54.73	0.5
6748	0.96	4	0.67	3	0.79	3	1	3	1	3	1	3	7	1	0.806667	-0.193333	0.00898774	0.275525	1	9742602	9742899	AluSx	-	S	x	0	0	13	0.4	0.51	9	0.28	0.51	2133	107	0	27	298	7	153	4.7	51.34	0.36
6755	0.58	6	0.65	6	0.56	6	0.78	6	0.77	6	0.64	6	6	0.73	0.596667	-0.133333	0.174631	0.601947	1	9745731	9745913	FAM	-	FAM	None	0	0	9	0.38	0.44	1	0.04	0.47	821	158	6	98	183	6	96	6.56	52.46	0.48
6761	0.64	7	0.79	10	0.4	8	0.39	7	0.69	9	0.24	9	10	0.44	0.61	0.17	0.340978	0.723747	1	9748630	9748896	AluJr	+	J	r	11	0.91	19	0.48	0.56	30	0.71	0.58	1699	146	0	11	267	10	143	7.49	53.56	0.53
6765	0.78	6	0.9	7	0.69	7	1	7	0.73	5	0.81	4	13	0.846667	0.79	-0.0566667	0.430043	0.767278	1	9754309	9754602	AluSz	+	S	z	11	0.91	9	0.24	0.56	4	0.13	0.49	2193	102	3	10	294	13	159	8.84	54.08	0.61
6800	1	4	0.69	5	0.32	5	1	5	0.98	5	0.83	3	7	0.936667	0.67	-0.266667	0.306732	0.723448	1	9772960	9773251	AluSq2	+	S	q2	9	1	9	0.35	0.45	2	0.1	0.4	2101	116	7	7	292	7	153	4.79	52.4	0.36
6814	0.92	3	0.88	4	0.75	4	0.88	4	0.88	4	0.85	4	4	0.87	0.85	-0.02	0.902446	0.993108	1	9792241	9792448	AluJb	-	J	b	5	0.8	16	0.48	0.52	13	0.38	0.53	864	189	5	87	208	4	101	3.85	48.56	0.33
6831	0.97	5	0.83	6	0.96	7	0.83	6	1	6	0.95	7	10	0.926667	0.92	-0.00666667	0.770159	0.948265	1	9805821	9806125	AluJb	-	J	b	0	0	3	0.13	0.44	3	0.14	0.42	2145	134	7	0	305	10	162	6.56	53.11	0.47
6866	0.89	7	1	7	0.97	8	0.84	9	0.92	3	1	5	15	0.92	0.953333	0.0333333	0.654349	0.897681	1	9826435	9826750	AluSz6	+	S	z6	33	0.76	3	0.13	0.43	7	0.27	0.46	2378	79	3	16	316	15	168	9.49	53.16	0.67
6888	0.83	6	1	5	0.78	6	0.92	4	1	5	0.69	7	12	0.87	0.87	0	0.926637	0.999939	1	9838791	9839110	AluSq10	+	S	q10	29	0.83	7	0.34	0.41	11	0.34	0.51	2365	94	0	25	320	12	165	7.5	51.56	0.58
6894	0.81	3	1	3	0.96	3	1	3	0.96	3	1	3	3	0.986667	0.923333	-0.0633333	0.312071	0.723448	1	9843356	9843479	AluJo	+	J	o	8	0.88	14	0.46	0.49	14	0.41	0.52	842	161	0	0	124	3	68	4.84	54.84	0.32
6903	1	3	0.93	3	0.89	3	1	4	0.6	3	1	3	8	0.866667	0.94	0.0733333	0.941703	1	1	9846418	9846735	AluSq2	+	S	q2	29	0.97	8	0.32	0.45	8	0.19	0.58	2471	82	0	19	318	8	164	5.03	51.57	0.38
6905	0.83	3	0.93	5	0.41	3	0.56	6	0.92	7	0.42	4	9	0.633333	0.723333	0.09	0.675119	0.908105	1	9848031	9848333	AluJb	+	J	b	20	0.85	12	0.46	0.47	12	0.34	0.53	1963	162	0	3	303	9	162	5.94	53.47	0.42
6909	0.8	5	0.97	8	0.67	6	0.71	7	0.75	4	0.79	7	16	0.75	0.813333	0.0633333	0.386136	0.738659	1	9850910	9851220	AluY	+	Y	None	21	1	12	0.79	0.35	7	0.22	0.5	2503	55	3	32	311	16	172	10.29	55.31	0.68
6922	1	4	1	5	0.71	4	1	6	1	6	1	6	6	1	0.903333	-0.0966667	0.313212	0.723448	1	9858955	9859252	AluJb	+	J	b	14	0.93	4	0.21	0.39	20	0.62	0.51	1766	154	17	24	298	6	160	4.03	53.69	0.28
6954	0.5	4	0.75	4	1	3	1	3	0.75	4	0.63	4	4	0.793333	0.75	-0.0433333	0.918079	0.996395	1	9877143	9877260	AluJo	+	J	o	1	1	10	0.32	0.5	11	0.42	0.46	727	203	0	0	118	4	64	6.78	54.24	0.47
6995	0.63	6	1	4	0.87	5	1	4	0.89	5	1	5	6	0.963333	0.833333	-0.13	0.319311	0.723448	1	9898771	9898999	AluJo	-	J	o	0	0	21	0.63	0.52	11	0.33	0.52	1080	170	319	0	229	6	118	5.24	51.53	0.4
7013	1	6	1	6	0.94	8	1	5	0.96	8	0.9	7	12	0.953333	0.98	0.0266667	0.478812	0.797257	1	9917257	9917565	AluY	+	Y	None	17	1	11	0.36	0.5	9	0.28	0.51	2362	78	0	36	309	12	169	7.77	54.69	0.54
7014	1	5	1	6	1	6	0.94	6	1	4	0.83	8	9	0.923333	1	0.0766667	0.101977	0.503913	1	9917566	9917857	AluSx	+	S	x	0	0	17	0.52	0.51	4	0.14	0.49	2016	106	0	38	292	9	161	6.16	55.14	0.41
7022	0.51	3	0.73	4	0.85	5	0.79	5	0.9	4	0.82	4	7	0.836667	0.696667	-0.14	0.247885	0.692202	1	9926470	9926753	AluSx1	+	S	x1	16	1	3	0.09	0.53	8	0.23	0.56	2080	109	49	0	284	7	159	4.93	55.99	0.32
7064	0.88	4	1	3	1	3	1	3	1	3	1	4	5	1	0.96	-0.04	0.332932	0.723448	1	9957726	9957890	AluSx1	+	S	x1	20	0.85	19	0.55	0.53	16	0.6	0.46	1148	139	6	0	165	5	85	6.06	51.52	0.48
7070	0.85	6	0.58	6	0.74	7	0.4	5	0.73	4	0.75	5	8	0.626667	0.723333	0.0966667	0.490911	0.805555	1	9960180	9960439	AluSc8	+	S	c8	1	1	11	0.33	0.52	10	0.27	0.55	1692	146	31	23	260	8	141	6.15	54.23	0.42
7081	1	7	0.89	12	1	5	0.86	7	0.74	10	0.78	5	16	0.793333	0.963333	0.17	0.0296656	0.403743	1	9971493	9971780	AluSz	-	S	z	0	0	7	0.29	0.44	15	0.5	0.49	2212	90	24	0	288	16	163	11.11	56.6	0.7
7098	0.93	7	0.8	7	0.69	7	0.96	6	0.93	6	0.83	6	7	0.906667	0.806667	-0.1	0.263771	0.710301	1	9980793	9981118	AluJb	-	J	b	0	0	2	0.09	0.41	9	0.29	0.5	1818	153	0	80	326	7	173	4.29	53.07	0.31
7152	0.94	4	0.84	4	0.92	4	1	4	1	4	1	4	4	1	0.9	-0.1	0.00250614	0.177583	1	10004347	10004454	AluJo	+	J	o	0	0	25	0.74	0.52	2	0.1	0.41	572	130	176	0	108	4	54	7.41	50	0.59
7154	0.78	5	1	4	1	4	1	4	0.83	3	0.88	4	8	0.903333	0.926667	0.0233333	0.579917	0.859735	1	10005010	10005319	AluSz	+	S	z	30	0.83	2	0.1	0.41	10	0.46	0.42	2259	129	7	0	310	8	154	5.16	49.68	0.42
7161	1	3	0.77	7	0.75	4	0.78	6	1	4	1	3	10	0.926667	0.84	-0.0866667	0.43618	0.77133	1	10009046	10009349	AluSx1	+	S	x1	25	0.84	8	0.27	0.49	7	0.31	0.42	2260	115	10	0	304	10	162	6.58	53.29	0.46
7173	1	5	0.97	5	0.95	4	1	3	0.88	5	0.88	4	8	0.92	0.973333	0.0533333	0.413384	0.754923	1	10013856	10014163	AluSx	-	S	x	0	0	10	0.31	0.51	3	0.13	0.44	2462	94	0	0	308	8	161	5.19	52.27	0.38
7183	0.91	11	0.93	13	0.83	10	0.9	12	0.97	12	0.94	13	13	0.936667	0.89	-0.0466667	0.271995	0.719072	1	10017397	10017648	AluSg	-	S	g	0	0	5	0.16	0.5	10	0.56	0.38	1703	95	151	0	252	13	142	10.32	56.35	0.66
7195	1	6	1	4	0.9	5	1	3	1	4	1	4	12	1	0.966667	-0.0333333	0.339508	0.723448	1	10023467	10023764	AluSg	-	S	g	0	0	5	0.22	0.43	5	0.23	0.42	2276	97	7	3	298	12	159	8.05	53.36	0.58
7261	0.64	6	0.83	8	1	5	1	3	0.87	5	0.92	6	8	0.93	0.823333	-0.106667	0.597334	0.868593	1	10052146	10052438	AluJb	-	J	b	0	0	4	0.19	0.41	12	0.36	0.52	2013	143	14	0	293	8	151	5.46	51.54	0.42
7273	0.54	8	0.33	9	0.29	7	0.67	6	0.64	7	0.5	7	11	0.603333	0.386667	-0.216667	0.109275	0.510858	1	10058112	10058348	AluSx	-	S	x	0	0	64	0.86	0.78	21	0.71	0.49	1753	89	8	17	237	11	134	9.28	56.54	0.6
7274	1	3	1	4	0.73	5	1	4	0.95	5	1	6	17	0.983333	0.91	-0.0733333	0.604019	0.872924	1	10058454	10058764	AluY	-	Y	None	0	0	37	0.81	0.61	1	0.04	0.45	2422	77	6	6	311	17	168	10.93	54.02	0.76
7286	0.96	7	0.79	7	0.92	8	0.72	5	0.83	6	0.83	7	11	0.793333	0.89	0.0966667	0.172198	0.598693	1	10064447	10064716	AluSp	-	S	p	0	0	13	0.39	0.52	3	0.16	0.39	2051	89	59	0	270	11	152	8.15	56.3	0.51
7295	0.98	5	1	4	1	3	0.81	4	0.96	5	1	3	8	0.923333	0.993333	0.07	0.195983	0.629678	1	10067824	10068125	AluSx1	+	S	x1	14	1	5	0.26	0.39	10	0.34	0.49	2082	122	0	23	302	8	160	5.3	52.98	0.38
7300	0.86	6	0.75	4	0.79	6	1	5	0.92	5	1	6	10	0.973333	0.8	-0.173333	0.0168505	0.336551	1	10069188	10069482	AluSc5	+	S	c5	22	0.86	8	0.37	0.42	7	0.27	0.46	2246	95	20	0	295	10	151	6.78	51.19	0.52
7315	1	4	0.83	5	0.75	5	0.88	4	0.93	3	0.76	3	8	0.856667	0.86	0.00333333	0.644949	0.893607	1	10074433	10074738	AluSx	-	S	x	0	0	6	0.22	0.47	6	0.24	0.47	2297	108	20	3	306	8	155	5.23	50.65	0.41
7318	0.93	5	0.8	5	0.54	4	0.75	3	0.65	4	0.9	5	5	0.766667	0.756667	-0.01	0.93044	1	1	10075524	10075734	AluJb	+	J	b	14	0.86	8	0.27	0.49	7	0.29	0.44	1643	183	3	36	211	5	113	4.74	53.55	0.33
7331	0.89	3	1	3	0.76	3	0.81	3	0.96	3	0.95	3	3	0.906667	0.883333	-0.0233333	0.935795	1	1	10082297	10082357	AluSx1	-	S	x1	0	0	7	0.28	0.45	8	0.31	0.45	424	180	0	0	61	3	36	9.84	59.02	0.59
7369	0.93	7	0.9	5	1	6	1	7	0.94	6	0.83	9	11	0.923333	0.943333	0.02	0.891404	0.989434	1	10101391	10101692	AluSq2	-	S	q2	0	0	4	0.16	0.45	13	0.38	0.52	2283	103	7	0	302	11	156	7.28	51.66	0.55
7375	0.75	4	0.97	6	1	9	1	9	1	7	0.93	7	12	0.976667	0.906667	-0.07	0.465101	0.787057	1	10104090	10104412	AluSz6	-	S	z6	0	0	12	0.44	0.47	9	0.29	0.51	2013	104	0	54	323	12	168	7.43	52.01	0.55
7376	0.88	4	0.92	6	0.86	7	1	7	0.94	6	0.96	8	8	0.966667	0.886667	-0.08	0.0613212	0.498347	1	10104667	10104940	AluSx3	-	S	x3	0	0	14	0.41	0.53	10	0.37	0.47	1885	157	4	7	274	8	147	5.84	53.65	0.41
7397	0.93	8	0.85	7	1	9	1	9	0.9	8	0.75	5	12	0.883333	0.926667	0.0433333	0.785276	0.954083	1	10119024	10119311	AluY	+	Y	None	23	0.74	4	0.1	0.58	9	0.25	0.54	1959	118	59	3	288	12	165	8.33	57.29	0.52
7399	0.89	3	1	3	1	3	0.78	3	0.67	3	0.67	3	5	0.706667	0.963333	0.256667	0.0142016	0.320956	1	10121317	10121608	AluSx	-	S	x	0	0	6	0.26	0.43	7	0.26	0.46	1897	134	34	10	292	5	147	3.42	50.34	0.27
7411	1	6	1	9	1	6	0.68	8	1	5	1	6	12	0.893333	1	0.106667	0.31175	0.723448	1	10128396	10128708	AluSx	-	S	x	0	0	7	0.22	0.51	4	0.17	0.44	2284	121	0	3	313	12	170	7.67	54.31	0.52
7418	1	4	0.69	4	1	4	0.83	3	0.72	4	1	3	5	0.85	0.896667	0.0466667	0.547724	0.841558	1	10133498	10133775	AluSz	+	S	z	0	0	3	0.16	0.38	5	0.19	0.47	1783	158	14	4	278	5	143	3.6	51.44	0.28
7432	1	4	1	3	0.96	4	0.75	4	1	4	0.89	3	6	0.88	0.986667	0.106667	0.195687	0.629385	1	10144745	10145061	AluSx1	-	S	x1	0	0	4	0.18	0.42	6	0.22	0.47	2056	136	6	25	317	6	159	3.79	50.16	0.3
7443	1	4	1	6	1	6	1	6	1	5	0.9	5	7	0.966667	1	0.0333333	0.339508	0.723448	1	10150186	10150477	AluJo	-	J	o	0	0	6	0.27	0.43	7	0.36	0.4	1740	192	0	3	292	7	156	4.79	53.42	0.34
7447	1	5	0.67	6	1	6	1	3	1	6	1	4	8	1	0.89	-0.11	0.311311	0.723448	1	10151666	10151961	AluSx1	-	S	x1	0	0	1	0.05	0.39	9	0.3	0.49	2071	128	3	3	296	8	149	5.41	50.34	0.43
7465	1	6	1	7	0.75	8	1	6	1	6	1	6	10	1	0.916667	-0.0833333	0.315609	0.723448	1	10162457	10162768	AluSx1	-	S	x1	0	0	1	0.08	0.33	5	0.26	0.4	2380	96	6	6	312	10	165	6.41	52.88	0.46
7478	1	4	1	4	1	4	0.97	4	1	4	0.96	4	5	0.976667	1	0.0233333	0.14698	0.561507	1	10175355	10175629	AluSz	-	S	z	0	0	8	0.3	0.46	3	0.18	0.37	1967	113	0	14	275	5	145	3.64	52.73	0.27
7479	1	3	0.9	6	0.97	8	0.88	4	0.93	5	1	3	9	0.936667	0.956667	0.02	0.71848	0.927363	1	10176202	10176500	AluSz6	-	S	z6	0	0	3	0.17	0.38	5	0.35	0.34	2022	151	0	0	299	9	153	6.02	51.17	0.46
7495	0.83	6	0.93	5	1	7	1	3	1	3	1	4	9	1	0.92	-0.08	0.0954337	0.500778	1	10184902	10185208	AluSx3	+	S	x3	24	0.88	3	0.15	0.4	1	0.06	0.36	2063	140	3	7	307	9	160	5.86	52.12	0.44
7520	1	6	0.96	6	1	5	1	6	0.8	5	0.83	6	6	0.876667	0.986667	0.11	0.177788	0.607072	1	10202911	10203177	AluSz	+	S	z	14	0.86	14	0.42	0.52	6	0.22	0.47	1738	142	19	11	267	6	133	4.49	49.81	0.36
7534	1	4	0.86	7	1	4	0.97	7	1	8	1	8	11	0.99	0.953333	-0.0366667	0.571709	0.856284	1	10212574	10212873	AluSx1	+	S	x1	18	0.94	10	0.43	0.43	6	0.16	0.55	2168	127	0	0	300	11	160	7.33	53.33	0.52
7535	0.94	4	0.94	3	0.87	4	0.9	4	0.89	3	1	4	4	0.93	0.916667	-0.0133333	0.569535	0.855417	1	10213282	10213576	AluJr	+	J	r	28	1	6	0.17	0.53	13	0.39	0.52	1862	152	54	0	295	4	138	2.71	46.78	0.25
7540	0.89	3	1	3	1	4	0.96	5	1	4	0.83	3	5	0.93	0.963333	0.0333333	0.579207	0.859206	1	10214327	10214430	AluSx	+	S	x	0	0	14	0.44	0.5	7	0.33	0.42	1540	130	26	13	104	5	55	9.62	52.88	0.74
7552	1	4	1	9	1	7	1	4	0.97	7	1	8	9	0.99	1	0.01	0.455388	0.780407	1	10222041	10222223	AluSx	-	S	x	0	0	6	0.29	0.41	14	0.48	0.48	2114	116	0	28	183	9	89	9.84	48.63	0.85
7565	0.88	8	1	4	0.91	11	0.79	7	1	9	1	8	15	0.93	0.93	0	0.67546	0.908257	1	10227648	10227945	AluSc	-	S	c	0	0	16	0.62	0.45	16	0.52	0.5	2361	87	7	0	298	15	160	10.07	53.69	0.71
7576	1	5	1	6	1	3	1	6	1	5	1	5	9	1	1	0	1	1	1	10237296	10237552	AluSz	+	S	z	5	1	8	0.33	0.44	4	0.18	0.42	1774	97	124	8	257	9	143	7	55.64	0.45
7579	1	6	0.94	3	0.87	5	0.95	4	0.67	4	1	4	14	0.873333	0.936667	0.0633333	0.796303	0.958456	1	10241585	10241876	AluSx3	+	S	x3	12	0.92	4	0.24	0.36	10	0.5	0.4	2316	75	10	7	292	14	164	9.59	56.16	0.61
7589	0.81	7	0.95	5	0.94	4	1	5	0.88	4	0.92	6	9	0.933333	0.9	-0.0333333	0.498286	0.810669	1	10245312	10245626	AluSq2	+	S	q2	29	0.9	8	0.26	0.5	5	0.19	0.47	2086	114	13	25	315	9	152	5.71	48.25	0.5
7605	0.67	3	0.85	4	0.67	3	0.94	4	1	4	1	4	4	0.98	0.73	-0.25	0.00676358	0.249325	1	10255402	10255657	AluJo	-	J	o	0	0	9	0.3	0.49	11	0.39	0.48	1384	152	176	0	256	4	131	3.13	51.17	0.24
7606	0.39	3	0.92	3	0.52	3	0.88	3	1	3	1	3	3	0.96	0.61	-0.35	0.0383776	0.433957	1	10255676	10255811	AluJb	-	J	b	0	0	8	0.26	0.5	10	0.35	0.48	1124	181	3	106	136	3	73	4.41	53.68	0.31
7632	0.78	3	0.89	3	0.33	3	1	3	0.93	3	0.83	3	3	0.92	0.666667	-0.253333	0.116503	0.520422	1	10265598	10265727	AluSx	+	S	x	7	0.57	11	0.38	0.48	13	0.46	0.48	1767	143	0	65	130	3	73	4.62	56.15	0.3
7636	1	5	1	4	0.63	5	1	4	1	4	0.87	3	5	0.956667	0.876667	-0.08	0.762174	0.945981	1	10266579	10266674	AluY	+	Y	None	20	0.85	14	0.46	0.5	5	0.27	0.4	381	171	2	5	96	5	44	10.42	45.83	1.01
7640	0.97	6	0.86	7	0.9	8	1	8	0.94	8	1	5	10	0.98	0.91	-0.07	0.103338	0.506562	1	10268392	10268712	AluSz6	-	S	z6	0	0	4	0.17	0.44	15	0.55	0.47	2170	97	3	40	321	10	161	6.23	50.16	0.5
7641	0.36	6	0.77	7	0.68	6	0.67	6	0.83	6	0.93	3	11	0.81	0.603333	-0.206667	0.169315	0.594701	1	10268995	10269290	AluSx1	+	S	x1	17	0.88	15	0.56	0.46	6	0.46	0.33	2253	98	10	0	296	11	155	7.43	52.36	0.55
7651	1	4	0.74	3	0.83	3	0.44	3	0.83	3	1	3	8	0.756667	0.856667	0.1	0.795015	0.957977	1	10278484	10278778	AluSz	-	S	z	0	0	2	0.09	0.44	8	0.69	0.31	2306	108	0	0	295	8	150	5.42	50.85	0.42
7695	0.92	4	0.88	5	0.83	4	0.83	5	0.87	5	0.91	5	5	0.87	0.876667	0.00666667	0.87267	0.984692	1	10301188	10301461	AluJo	-	J	o	0	0	0	0	0.34	4	0.28	0.34	1661	171	33	0	274	5	149	3.65	54.38	0.25
7705	1	4	0.87	5	1	5	0.96	5	1	4	1	5	5	0.986667	0.956667	-0.03	0.665855	0.903654	1	10309678	10309976	AluJo	+	J	o	15	0.8	2	0.13	0.36	10	0.53	0.39	1913	157	3	7	299	5	161	3.34	53.85	0.23
7706	1	3	0.88	3	1	3	1	3	0.83	3	1	3	3	0.943333	0.96	0.0166667	0.913089	0.995096	1	10310038	10310166	AluJo	-	J	o	0	0	6	0.22	0.47	8	0.4	0.4	878	163	0	0	129	3	64	4.65	49.61	0.38
7720	0.96	4	0.93	4	0.6	4	1	4	1	4	0.75	4	4	0.916667	0.83	-0.0866667	0.328312	0.723448	1	10315868	10316166	AluJb	-	J	b	0	0	9	0.37	0.44	2	0.15	0.33	1508	171	23	63	299	4	149	2.68	49.83	0.22
7737	0.8	10	1	7	1	13	0.92	12	0.98	10	0.91	6	13	0.936667	0.933333	-0.00333333	0.571804	0.856284	1	10327066	10327384	AluSz	-	S	z	0	0	5	0.33	0.35	3	0.15	0.4	2144	119	0	31	319	13	168	8.15	52.66	0.59
7763	1	6	0.94	4	1	4	1	3	0.89	6	0.8	5	8	0.896667	0.98	0.0833333	0.267021	0.713832	1	10350703	10350932	AluSc	+	S	c	12	1	11	0.5	0.42	4	0.29	0.34	1800	83	26	0	230	8	119	6.96	51.74	0.52
7795	0.56	3	0.9	3	1	3	0.67	3	1	3	1	3	3	0.89	0.82	-0.07	0.571212	0.856284	1	10383407	10383678	AluJb	+	J	b	0	0	8	0.38	0.41	5	0.24	0.41	1560	188	40	7	272	3	146	2.21	53.68	0.16
7802	1	5	1	6	1	7	1	5	1	6	0.97	5	13	0.99	1	0.01	0.455388	0.780407	1	10392115	10392423	AluSq10	-	S	q10	0	0	2	0.15	0.33	17	0.57	0.49	2481	84	0	3	309	13	169	8.41	54.69	0.57
7808	1	3	0.95	4	1	4	1	4	1	4	0.8	5	5	0.933333	0.983333	0.05	0.650815	0.895779	1	10395001	10395303	AluJr	-	J	r	0	0	7	0.3	0.43	9	0.36	0.45	1704	172	10	33	303	5	146	3.3	48.18	0.29
7813	0.9	5	0.53	5	0.86	3	0.88	4	0.8	5	0.94	4	5	0.873333	0.763333	-0.11	0.398125	0.748425	1	10400623	10400849	AluSz	+	S	z	15	0.93	4	0.3	0.33	2	0.12	0.37	1245	123	313	4	227	5	124	4.41	54.63	0.3
7815	1	4	1	3	1	3	0.95	3	1	3	1	3	4	0.983333	1	0.0166667	0.382679	0.735821	1	10401747	10402026	AluJb	+	J	b	17	1	0	0	0.46	1	0.07	0.33	1604	157	75	7	280	4	137	2.86	48.93	0.25
7818	1	7	1	7	0.56	8	0.95	7	0.93	7	0.86	7	10	0.913333	0.85	-0.0633333	0.619473	0.879635	1	10404970	10405212	AluJb	+	J	b	1	1	2	0.11	0.38	3	0.15	0.4	1622	152	4	4	243	10	138	8.23	56.79	0.53
7843	1	3	1	3	1	3	0.67	3	0.89	3	0.93	3	6	0.83	1	0.17	0.00404925	0.211893	1	10424259	10424561	AluSx1	-	S	x1	0	0	3	0.25	0.31	14	0.56	0.45	2435	86	3	0	303	6	158	3.96	52.15	0.29
7858	1	4	1	4	1	3	1	5	0.94	4	1	5	7	0.98	1	0.02	0.367384	0.72739	1	10431721	10432017	AluJr	+	J	r	23	0.87	1	0.04	0.44	3	0.12	0.45	1842	148	40	10	297	7	152	4.71	51.18	0.37
7873	0.8	3	0.92	4	1	4	1	4	1	3	0.94	3	4	0.98	0.906667	-0.0733333	0.299626	0.723448	1	10443803	10444081	AluJo	+	J	o	7	0.86	4	0.2	0.44	14	0.42	0.52	1807	136	4	25	279	4	146	2.87	52.33	0.21
7887	1	3	1	4	1	4	1	4	1	4	0.8	5	8	0.933333	1	0.0666667	0.319756	0.723448	1	10450247	10450545	AluSp	-	S	p	0	0	9	0.33	0.47	16	0.54	0.49	2100	84	23	43	299	8	156	5.35	52.17	0.39
7897	0.88	4	1	4	1	3	1	4	1	3	1	3	6	1	0.96	-0.04	0.332932	0.723448	1	10454867	10455125	AluSz	+	S	z	0	0	0	0	0.29	4	0.17	0.43	1618	135	0	50	259	6	129	4.63	49.81	0.38
7909	0.94	4	0.8	5	0.8	5	0.92	4	0.92	3	0.58	4	6	0.806667	0.846667	0.04	0.899203	0.992197	1	10461056	10461276	AluSx	+	S	x	21	0.86	9	0.36	0.45	1	0.06	0.38	1609	104	27	0	221	6	103	5.43	46.61	0.5
7923	1	3	1	3	1	3	0.94	3	0.93	3	1	3	3	0.956667	1	0.0433333	0.0991827	0.501358	1	10467088	10467203	FLAM_A	+	FLAM_A	None	0	0	7	0.3	0.43	3	0.09	0.52	670	216	0	0	116	3	63	5.17	54.31	0.36
7937	0.83	6	1	6	1	8	0.88	8	0.92	6	0.93	7	11	0.91	0.943333	0.0333333	0.234619	0.676208	1	10477770	10478067	AluSq2	-	S	q2	0	0	9	0.29	0.5	14	0.8	0.37	2221	117	0	7	298	11	156	7.38	52.35	0.54
7938	1	5	0.85	8	0.8	10	1	5	0.9	5	0.83	6	15	0.91	0.883333	-0.0266667	0.863263	0.98157	1	10478552	10478847	AluSc	+	S	c	17	1	13	0.76	0.37	8	0.3	0.46	2391	88	0	0	296	15	162	10.14	54.73	0.68
7943	1	4	1	5	1	4	0.92	6	0.98	4	0.62	4	6	0.84	1	0.16	0.0474563	0.460978	1	10481871	10482165	AluJo	+	J	o	15	1	9	0.31	0.48	7	0.2	0.52	1987	149	10	3	295	6	159	4.07	53.9	0.28
7944	0.72	5	0.96	5	1	5	1	5	0.95	5	0.97	5	5	0.973333	0.893333	-0.08	0.498714	0.810999	1	10482227	10482522	AluJb	-	J	b	0	0	6	0.19	0.51	7	0.21	0.51	1738	152	7	27	296	5	154	3.38	52.03	0.25
7951	0.64	6	0.6	5	0.57	7	0.78	6	0.83	7	0.85	8	13	0.82	0.603333	-0.216667	0.0257558	0.387618	1	10487684	10487956	AluSp	-	S	p	0	0	11	0.38	0.48	6	0.25	0.43	2249	48	18	11	273	13	154	9.52	56.41	0.61
7962	0.88	4	1	4	0.98	7	1	6	1	6	0.8	5	8	0.933333	0.953333	0.02	0.979133	1	1	10496039	10496334	AluSz	-	S	z	0	0	6	0.32	0.39	13	0.48	0.48	2298	101	7	3	296	8	153	5.41	51.69	0.41
7971	0.95	4	0.96	4	0.97	5	1	3	0.93	3	1	3	6	0.976667	0.96	-0.0166667	0.329685	0.723448	1	10501371	10501669	AluJb	-	J	b	0	0	6	0.22	0.46	12	0.4	0.49	2010	147	17	0	299	6	155	4.01	51.84	0.3
7991	0.67	3	0.8	5	0.75	4	0.8	5	0.75	4	0.67	3	9	0.74	0.74	0	1	1	1	10508696	10508990	AluSc8	+	S	c8	20	0.75	8	0.26	0.5	18	0.47	0.56	2278	102	7	0	295	9	157	6.1	53.22	0.44
8002	1	8	1	6	1	5	1	9	0.75	12	0.8	6	16	0.85	1	0.15	0.0752374	0.500778	1	10515549	10515850	AluY	-	Y	None	0	0	13	0.5	0.46	6	0.21	0.49	2494	56	10	3	302	16	165	10.6	54.64	0.72
8015	0.96	3	0.79	7	0.96	5	0.71	7	1	5	1	4	10	0.903333	0.903333	0	0.541122	0.838358	1	10522225	10522487	AluSq2	-	S	q2	0	0	20	0.54	0.55	3	0.12	0.44	1960	88	95	4	263	10	141	7.6	53.61	0.53
8035	0.92	6	1	7	1	7	1	4	0.9	8	1	6	11	0.966667	0.973333	0.00666667	0.936586	1	1	10529884	10530170	AluSg7	-	S	g7	0	0	11	0.4	0.47	10	0.44	0.43	2068	112	70	0	287	11	147	7.67	51.22	0.59
8041	0.69	8	1	9	0.86	9	1	8	0.67	6	0.93	5	15	0.866667	0.85	-0.0166667	0.878121	0.985499	1	10533433	10533742	AluSx	+	S	x	30	0.77	10	0.54	0.38	8	0.45	0.38	2274	107	3	3	310	15	171	9.68	55.16	0.64
8045	0.82	7	0.89	9	0.93	7	0.8	5	0.87	6	0.97	8	12	0.88	0.88	0	0.792951	0.957356	1	10536560	10536846	AluSx1	-	S	x1	0	0	3	0.13	0.43	8	0.28	0.48	2117	112	35	0	287	12	153	8.36	53.31	0.6
8067	1	4	1	4	1	4	0.91	4	1	3	1	4	4	0.97	1	0.03	0.343953	0.723747	1	10545357	10545675	AluJr4	-	J	r4	0	0	6	0.25	0.44	10	0.44	0.43	1885	147	3	38	319	4	153	2.51	47.96	0.22
8097	1	3	1	6	0.88	4	0.86	7	0.53	5	0.67	3	11	0.686667	0.96	0.273333	0.0243102	0.382105	1	10566329	10566632	AluSp	-	S	p	0	0	4	0.14	0.47	5	0.31	0.37	2262	89	13	13	304	11	160	7.24	52.63	0.52
8104	1	6	1	6	1	6	0.9	5	1	6	1	6	6	0.966667	0.996667	0.03	0.339508	0.723448	1	10579838	10580196	AluJb	-	J	b	0	0	7	0.26	0.47	4	0.16	0.46	1247	156	8	181	359	6	174	3.34	48.47	0.28
8108	0.95	4	1	5	0.75	5	1	5	1	4	1	5	7	1	0.9	-0.1	0.119396	0.523232	1	10584765	10585046	AluJr4	-	J	r4	0	0	0	0	0.38	5	0.27	0.39	1567	145	53	39	282	7	146	4.96	51.77	0.39
8116	0.5	4	0.83	9	0.57	7	0.75	10	0.78	9	0.92	7	18	0.816667	0.633333	-0.183333	0.186429	0.619022	1	10602537	10602845	AluSc8	+	S	c8	28	0.82	6	0.41	0.35	10	0.47	0.41	2422	94	0	0	309	18	162	11.65	52.43	0.85
8142	0.89	11	1	7	1	9	0.93	3	0.62	8	0.82	7	15	0.79	0.963333	0.173333	0.06095	0.497731	1	10623375	10623695	AluSp	+	S	p	13	0.92	10	0.42	0.44	16	0.61	0.46	2075	68	16	93	321	15	171	9.35	53.27	0.66
8156	1	3	1	3	1	3	1	3	1	3	0.89	3	3	0.963333	1	0.0366667	0.335911	0.723448	1	10633372	10633482	FLAM_C	+	FLAM_C	None	6	1	9	0.51	0.38	4	0.2	0.4	650	126	135	27	111	3	57	5.41	51.35	0.41
8158	1	4	0.96	4	0.75	4	0.92	4	1	3	0.73	5	5	0.883333	0.903333	0.02	0.836723	0.97303	1	10634886	10635157	AluJr	+	J	r	30	0.83	2	0.12	0.37	4	0.4	0.28	1300	165	165	18	272	5	138	3.68	50.74	0.3
8178	1	3	1	4	1	3	1	3	1	4	0.83	4	11	0.943333	1	0.0566667	0.323295	0.723448	1	10660195	10660489	AluSq	+	S	q	11	0.91	5	0.32	0.36	16	0.56	0.48	2366	78	0	3	295	11	162	7.46	54.92	0.5
8191	1	3	0.9	5	1	3	0.97	6	1	6	1	7	10	0.99	0.966667	-0.0233333	0.626875	0.883309	1	10679881	10680199	AluY	+	Y	None	28	0.86	12	0.43	0.47	6	0.21	0.48	2358	88	0	31	319	10	171	6.27	53.61	0.44
8195	1	4	0.97	7	1	4	1	3	0.78	4	1	6	12	0.926667	0.99	0.0633333	0.515198	0.822205	1	10681397	10681701	AluSg	-	S	g	0	0	15	0.51	0.48	8	0.24	0.52	2367	105	0	0	305	12	162	7.87	53.11	0.57
8226	1	4	0.8	5	1	5	1	5	1	3	0.8	5	7	0.933333	0.933333	0	1	1	1	10790161	10790390	AluSx1	-	S	x1	0	0	18	0.53	0.52	5	0.23	0.42	1233	97	372	0	230	7	125	6.09	54.35	0.42
8242	0.94	7	0.96	8	0.91	8	0.97	8	0.81	8	0.81	9	9	0.863333	0.936667	0.0733333	0.413549	0.755109	1	10810320	10810624	AluJr	-	J	r	0	0	12	0.3	0.57	10	0.32	0.5	1610	148	79	59	305	9	156	5.9	51.15	0.46
8303	0.75	5	1	5	0.71	5	0.83	4	0.93	5	0.93	5	5	0.896667	0.82	-0.0766667	0.9615	1	1	10882195	10882498	AluJr	-	J	r	0	0	14	0.45	0.5	7	0.21	0.52	2047	135	10	7	304	5	157	3.29	51.64	0.25
8315	1	3	0.63	3	0.44	3	0.75	3	0.75	4	0.55	4	4	0.683333	0.69	0.00666667	0.56493	0.852282	1	10889095	10889403	AluJb	+	J	b	12	1	17	0.52	0.51	12	0.37	0.51	1744	152	0	45	309	4	158	2.59	51.13	0.2
8356	1	5	0.81	4	0.8	5	0.8	5	1	3	0.78	4	7	0.86	0.87	0.01	0.965226	1	1	10931607	10931921	AluSx	-	S	x	0	0	13	0.37	0.53	5	0.14	0.55	2296	118	0	9	315	7	155	4.44	49.21	0.38
8370	0.78	6	0.6	5	0.89	3	0.24	6	0.89	6	0.84	7	8	0.656667	0.756667	0.1	0.718635	0.927431	1	10939123	10939422	AluJb	+	J	b	11	0.91	10	0.24	0.58	12	0.36	0.52	1708	167	10	33	300	8	155	5.33	51.67	0.4
8399	1	3	0.97	8	0.81	8	1	8	0.83	6	0.81	7	10	0.88	0.926667	0.0466667	0.628389	0.884181	1	10959350	10959648	AluSz	+	S	z	19	0.63	7	0.18	0.56	10	0.26	0.58	2100	127	10	3	299	10	159	6.69	53.18	0.48
8412	1	5	1	5	0.79	7	1	3	0.97	6	1	5	10	0.99	0.93	-0.06	0.520308	0.825742	1	10972132	10972433	AluSx	+	S	x	20	0.95	6	0.17	0.54	20	0.42	0.62	2299	109	3	0	302	10	162	6.62	53.64	0.46
8423	0.81	3	1	5	1	4	0.92	4	1	4	0.96	5	9	0.96	0.936667	-0.0233333	0.902424	0.993101	1	10979761	10980070	AluSq2	-	S	q2	0	0	14	0.43	0.51	11	0.26	0.58	2422	100	3	0	310	9	161	5.81	51.94	0.43
8443	1	5	1	4	0.75	4	1	3	1	5	1	4	11	1	0.916667	-0.0833333	0.315609	0.723448	1	10991442	10991742	AluSz6	+	S	z6	20	0.7	5	0.21	0.44	5	0.15	0.52	2127	126	7	0	301	11	164	7.31	54.49	0.5
8451	0.75	8	0.95	9	1	9	0.92	8	0.96	6	0.97	9	13	0.95	0.9	-0.05	0.880019	0.986305	1	10996375	10996674	AluSx	+	S	x	19	0.79	4	0.13	0.49	10	0.44	0.43	2260	110	3	0	300	13	165	8.67	55	0.58
8461	0.39	5	0.56	3	0.87	3	0.83	3	0.62	6	0.93	5	10	0.793333	0.606667	-0.186667	0.298375	0.723448	1	11005016	11005272	AluSg	+	S	g	24	0.79	14	0.38	0.55	15	0.37	0.59	1845	102	0	0	257	10	130	7.78	50.58	0.62
8469	1	5	0.92	6	0.97	5	1	4	0.63	5	0.62	4	7	0.75	0.963333	0.213333	0.269223	0.716241	1	11012580	11012868	AluSz	-	S	z	0	0	4	0.16	0.44	10	0.5	0.4	1899	132	66	0	289	7	153	4.84	52.94	0.35
8476	0.46	9	0.86	8	0.53	6	0.79	8	0.91	7	0.83	7	12	0.843333	0.616667	-0.226667	0.145263	0.55992	1	11021719	11022023	AluSz	+	S	z	20	0.75	14	0.34	0.58	11	0.36	0.5	1698	128	69	79	305	12	151	7.87	49.51	0.64
8479	0.82	5	0.48	6	0.9	7	0.49	7	0.55	4	0.33	4	8	0.456667	0.733333	0.276667	0.101852	0.503913	1	11022895	11023161	AluJr	+	J	r	7	1	6	0.22	0.47	6	0.2	0.49	1653	150	94	11	267	8	144	5.99	53.93	0.42
8488	0.58	4	0.39	4	0.35	6	0.85	6	0.33	4	0.38	4	7	0.52	0.44	-0.08	0.610044	0.876144	1	11028058	11028232	AluSg4	+	S	g4	17	0.76	8	0.3	0.46	11	0.46	0.44	1161	143	0	6	175	7	90	8	51.43	0.61
8501	0.6	5	1	3	0.86	7	0.67	3	0.75	4	0.83	9	17	0.75	0.82	0.07	0.355009	0.724797	1	11036391	11036706	AluSg7	-	S	g7	0	0	14	0.38	0.54	7	0.26	0.47	2307	67	0	54	316	17	177	10.76	56.01	0.7
8502	1	3	0.72	3	0.67	3	1	5	1	3	0.56	3	5	0.853333	0.796667	-0.0566667	0.553503	0.845834	1	11036931	11037211	AluJb	+	J	b	0	0	16	0.54	0.49	11	0.41	0.46	1832	149	0	14	281	5	157	3.56	55.87	0.23
8505	1	5	0.9	8	0.9	5	1	5	1	5	0.86	7	10	0.953333	0.933333	-0.02	0.566629	0.853484	1	11037946	11038246	AluSq2	+	S	q2	22	0.86	3	0.15	0.39	9	0.28	0.51	2120	126	3	10	301	10	149	6.64	49.5	0.54
8520	1	4	0.96	5	1	3	0.87	7	0.93	5	1	5	7	0.933333	0.986667	0.0533333	0.259732	0.705412	1	11044865	11045160	AluSz	+	S	z	21	0.76	5	0.2	0.45	11	0.35	0.51	2162	132	0	0	296	7	154	4.73	52.03	0.35
8523	0.93	6	0.69	6	0.33	4	0.08	3	0.73	8	1	5	12	0.603333	0.65	0.0466667	0.939111	1	1	11046313	11046616	AluSc8	-	S	c8	0	0	8	0.32	0.47	8	0.33	0.44	2329	86	7	16	304	12	161	7.89	52.96	0.57
8524	0.9	5	1	8	0.6	5	0.76	7	0.67	4	1	3	11	0.81	0.833333	0.0233333	0.876538	0.985353	1	11047076	11047389	AluSx1	+	S	x1	30	0.77	8	0.33	0.44	4	0.2	0.43	2336	112	0	6	314	11	172	7.01	54.78	0.47
8525	1	4	1	4	0.83	3	1	3	0.96	4	1	3	4	0.986667	0.943333	-0.0433333	0.619492	0.879635	1	11047604	11047901	AluJo	+	J	o	25	0.76	7	0.33	0.44	3	0.1	0.5	1528	174	70	40	298	4	145	2.68	48.66	0.23
8569	0.36	3	0.56	6	0.47	5	1	3	0.93	5	0.4	5	6	0.776667	0.463333	-0.313333	0.119657	0.523583	1	11067356	11067647	AluSx	-	S	x	0	0	6	0.24	0.45	3	0.15	0.4	2174	120	3	3	292	6	150	4.11	51.37	0.31
8571	0.73	5	0.58	4	0.75	4	0.7	5	0.75	6	0.62	4	10	0.69	0.686667	-0.00333333	0.988341	1	1	11068213	11068498	AluSp	-	S	p	0	0	4	0.18	0.43	14	0.5	0.48	2197	87	31	0	286	10	152	6.99	53.15	0.5
8583	0.6	5	0.69	11	0.59	11	0.5	7	0.74	9	0.48	6	14	0.573333	0.626667	0.0533333	0.687165	0.912486	1	11071893	11072045	AluSx3	-	S	x3	0	0	9	0.35	0.46	26	0.69	0.55	1141	105	0	7	153	14	94	18.3	61.44	0.99
8586	1	5	0.78	8	1	6	0.88	6	0.93	5	1	4	8	0.936667	0.926667	-0.01	0.738258	0.935745	1	11075022	11075175	AluSx1	+	S	x1	14	1	9	0.37	0.45	12	0.42	0.48	1123	117	13	0	154	8	84	10.39	54.55	0.72
8610	0.97	5	0.87	5	1	5	0.97	5	0.93	5	0.9	5	5	0.933333	0.946667	0.0133333	0.513644	0.821431	1	11091707	11091977	AluJb	+	J	b	11	0.91	17	0.54	0.51	7	0.25	0.48	1621	155	81	0	271	5	145	3.69	53.51	0.27
8617	0.44	3	0.83	3	0.56	3	0.42	3	0.9	3	0.5	3	4	0.606667	0.61	0.00333333	0.917834	0.996365	1	11094047	11094319	AluSx	+	S	x	21	0.95	12	0.37	0.51	7	0.29	0.44	1875	128	4	18	273	4	136	2.93	49.82	0.24
8622	0.75	4	0.8	5	0.89	7	0.94	6	0.69	5	0.93	5	11	0.853333	0.813333	-0.04	0.476412	0.795819	1	11097102	11097445	AluSx1	-	S	x1	0	0	8	0.37	0.42	12	0.59	0.4	2117	90	0	105	344	11	176	6.4	51.16	0.49
8628	0.69	6	0.83	6	0.43	7	1	4	1	5	0.25	4	10	0.75	0.65	-0.1	0.29573	0.723448	1	11106069	11106369	AluSz	-	S	z	0	0	18	0.38	0.62	17	0.35	0.62	2245	116	0	0	301	10	163	6.64	54.15	0.46
8642	0.08	4	0.6	5	0.39	6	0.63	7	0.7	6	0.34	4	7	0.556667	0.356667	-0.2	0.280431	0.723448	1	11112071	11112278	AluSx	-	S	x	0	0	7	0.25	0.48	13	0.43	0.49	1994	132	23	20	208	7	114	6.73	54.81	0.46
8645	1	5	0.87	3	1	3	0.9	5	1	6	0.61	6	16	0.836667	0.956667	0.12	0.375419	0.734886	1	11115475	11115770	AluY	-	Y	None	0	0	22	0.52	0.58	11	0.22	0.63	2296	71	0	3	296	16	164	10.81	55.41	0.71
8647	1	6	0.94	6	0.95	6	1	5	1	6	1	6	6	1	0.963333	-0.0366667	0.107114	0.50833	1	11116932	11117213	AluJr	-	J	r	0	0	9	0.21	0.58	13	0.38	0.53	1563	152	78	3	282	6	143	4.26	50.71	0.34
8650	1	5	1	6	0.95	5	0.83	6	0.83	6	0.83	3	12	0.83	0.983333	0.153333	0.00675699	0.249243	1	11118336	11118640	AluSp	+	S	p	22	1	12	0.36	0.51	23	0.47	0.63	2226	92	3	3	305	12	161	7.87	52.79	0.57
8655	0.61	5	0.72	6	0.76	5	0.93	5	0.95	5	1	5	10	0.96	0.696667	-0.263333	0.0100175	0.286075	1	11124324	11124616	AluSq2	+	S	q2	22	1	12	0.38	0.51	13	0.45	0.48	2084	92	44	3	293	10	159	6.83	54.27	0.47
8665	0.67	3	0.78	10	0.88	8	1	4	0.89	8	0.75	4	18	0.88	0.776667	-0.103333	0.257107	0.702724	1	11133193	11133488	AluSc8	-	S	c8	0	0	8	0.34	0.44	7	0.26	0.46	2210	81	7	0	296	18	169	12.16	57.09	0.75
8667	1	4	1	3	1	3	1	4	0.95	3	0.87	3	7	0.94	1	0.06	0.107455	0.508611	1	11134471	11134773	AluSz	-	S	z	0	0	12	0.38	0.5	5	0.2	0.44	2212	92	0	13	303	7	161	4.62	53.14	0.33
8706	0.25	4	0.28	4	0.23	4	0.21	4	0.12	4	0.15	4	4	0.16	0.253333	0.0933333	0.171467	0.597428	1	11160234	11160334	FLAM_A	-	FLAM_A	None	0	0	44	0.93	0.62	19	0.56	0.52	486	178	89	0	101	4	57	7.92	56.44	0.5
8707	0.42	6	0.13	5	0.34	6	0.67	6	0.43	5	0.39	6	6	0.496667	0.296667	-0.2	0.176272	0.604804	1	11160367	11160523	AluJb	+	J	b	5	1	37	0.91	0.57	17	0.54	0.5	758	153	127	25	157	6	88	7.64	56.05	0.51
8712	0.92	3	0.77	3	1	3	1	3	0.78	3	1	3	3	0.926667	0.896667	-0.03	0.598675	0.869571	1	11161504	11161607	AluJb	-	J	b	0	0	20	0.57	0.53	4	0.15	0.47	434	227	167	13	104	3	56	5.77	53.85	0.42
8735	0.8	5	0.95	7	0.83	6	0.42	4	0.79	7	0.96	7	7	0.723333	0.86	0.136667	0.593292	0.867169	1	11178664	11178983	AluJr	-	J	r	0	0	11	0.46	0.44	9	0.33	0.47	1830	159	6	31	320	7	161	4.38	50.31	0.35
8741	0.75	4	1	4	1	4	0.78	3	0.89	3	0.95	4	4	0.873333	0.916667	0.0433333	0.28974	0.723448	1	11180150	11180313	AluJb	-	J	b	3	0.67	9	0.43	0.41	4	0.14	0.48	1332	166	47	94	164	4	84	4.88	51.22	0.37
8745	1	4	1	3	1	3	1	4	0.75	4	0.75	4	12	0.833333	1	0.166667	0.0737519	0.500778	1	11182560	11182862	AluSx3	-	S	x3	0	0	12	0.34	0.53	6	0.27	0.42	2409	92	0	0	303	12	152	7.92	50.17	0.63
8801	1	4	1	5	1	4	0.83	3	1	3	1	3	7	0.943333	1	0.0566667	0.323295	0.723448	1	11237333	11237630	AluJr	+	J	r	15	0.87	3	0.12	0.47	6	0.33	0.38	1939	168	0	0	298	7	153	4.7	51.34	0.36
8810	1	5	1	5	1	5	1	4	1	5	1	5	5	1	1	0	1	1	1	11244509	11244815	AluJr4	+	J	r4	25	0.92	3	0.2	0.35	5	0.18	0.48	1707	179	13	10	307	5	140	3.26	45.6	0.32
8835	1	3	1	6	0.93	7	0.69	7	0.94	8	0.67	3	14	0.766667	0.976667	0.21	0.032305	0.415865	1	11277454	11277767	AluY	-	Y	None	0	0	1	0.07	0.33	7	0.34	0.41	2267	64	0	64	314	14	168	8.92	53.5	0.64
8846	1	3	0.67	3	1	4	1	5	1	3	0.97	5	8	0.99	0.89	-0.1	0.475527	0.79525	1	11288256	11288545	AluSx	-	S	x	0	0	9	0.4	0.43	7	0.23	0.5	2269	110	0	0	290	8	153	5.52	52.76	0.4
8875	1	3	1	3	0.96	3	1	3	1	3	0.94	3	3	0.98	0.986667	0.00666667	0.855585	0.978102	1	11312367	11312493	AluJb	-	J	b	0	0	2	0.14	0.34	9	0.31	0.49	828	150	0	16	127	3	69	4.72	54.33	0.33
8892	0.95	7	0.44	12	0.3	10	0.67	12	0.57	8	0.44	11	18	0.56	0.563333	0.00333333	0.747395	0.939436	1	11323246	11323542	AluSx	+	S	x	2	1	22	0.86	0.45	13	0.53	0.44	2015	88	10	54	297	18	176	12.12	59.26	0.69
8893	0.83	4	0.15	3	0.39	4	0.8	4	0.88	3	1	3	5	0.893333	0.456667	-0.436667	0.0636671	0.500778	1	11323613	11323735	FLAM_C	+	FLAM_C	None	20	0.8	18	0.64	0.48	14	0.63	0.42	755	114	106	16	123	5	65	8.13	52.85	0.59
8901	0.6	5	0.83	3	1	3	0.5	4	0.67	4	0.75	4	7	0.64	0.81	0.17	0.221753	0.661279	1	11327333	11327647	AluSg	-	S	g	0	0	6	0.18	0.51	7	0.26	0.47	2228	111	0	0	315	7	163	4.44	51.75	0.33
8919	0.86	7	0.93	7	0.72	6	0.93	5	0.62	6	0.69	3	17	0.746667	0.836667	0.09	0.550309	0.843526	1	11334344	11334649	AluSc	-	S	c	0	0	17	0.59	0.48	8	0.32	0.45	2389	82	0	3	306	17	166	11.11	54.25	0.76
8927	1	7	0.93	7	1	5	0.95	6	1	7	1	7	9	0.983333	0.976667	-0.00666667	0.889052	0.98889	1	11338922	11339220	AluSx3	-	S	x3	0	0	5	0.33	0.35	6	0.23	0.46	2142	141	0	0	299	9	153	6.02	51.17	0.46
8933	1	4	1	4	1	5	1	5	0.67	5	1	7	9	0.89	1	0.11	0.311311	0.723448	1	11348683	11348991	AluJr	+	J	r	23	0.91	7	0.26	0.46	7	0.28	0.46	2100	142	0	13	309	9	151	5.83	48.87	0.5
8955	0.67	3	0.49	5	0.45	7	0.78	6	0.67	7	1	3	7	0.816667	0.536667	-0.28	0.124314	0.529963	1	11363534	11363844	AluJo	-	J	o	0	0	14	0.46	0.5	6	0.17	0.54	1843	154	19	26	311	7	147	4.5	47.27	0.4
8975	0.66	4	0.61	3	0.81	4	0.91	3	0.85	4	0.82	3	9	0.86	0.693333	-0.166667	0.0830525	0.500778	1	11383301	11383580	AluSx	-	S	x	0	0	10	0.32	0.5	3	0.07	0.58	2085	111	11	0	280	9	158	6.43	56.43	0.41
8981	0.53	5	0.47	6	0.42	4	0.75	5	0.94	4	0.56	3	8	0.75	0.473333	-0.276667	0.0933362	0.500778	1	11386535	11386895	AluSz	-	S	z	0	0	5	0.18	0.48	10	0.25	0.57	1953	75	0	177	361	8	181	4.43	50.14	0.35
8983	0.93	5	0.88	9	0.61	8	0.94	8	1	8	0.71	7	14	0.883333	0.806667	-0.0766667	0.378585	0.735821	1	11388033	11388351	AluJb	-	J	b	0	0	7	0.17	0.58	9	0.29	0.51	2349	94	0	28	319	14	166	8.78	52.04	0.65
8994	0.75	4	0.6	5	0.63	6	0.83	3	1	5	1	4	6	0.943333	0.66	-0.283333	0.0242105	0.381759	1	11396383	11396679	AluJb	+	J	b	38	0.74	4	0.12	0.53	12	0.58	0.42	1360	165	92	22	297	6	152	4.04	51.18	0.31
9004	0.75	6	0.47	5	0.8	5	0.75	6	0.96	6	0.93	5	7	0.88	0.673333	-0.206667	0.0948927	0.500778	1	11405654	11405945	AluSz6	-	S	z6	0	0	8	0.19	0.59	13	0.35	0.55	1989	140	31	0	292	7	152	4.79	52.05	0.36
9012	0.81	4	1	4	0.28	5	0.83	6	0.8	5	0.64	7	12	0.756667	0.696667	-0.06	0.732849	0.932694	1	11412684	11412978	AluSx	-	S	x	0	0	6	0.15	0.57	5	0.14	0.53	2364	92	0	0	295	12	165	8.14	55.93	0.52
9013	0.94	4	0.71	3	0.7	5	0.79	4	0.83	4	0.7	4	7	0.773333	0.783333	0.01	0.724331	0.930216	1	11413593	11413890	AluSz	-	S	z	0	0	7	0.2	0.53	5	0.17	0.48	2040	148	17	3	298	7	149	4.7	50	0.38
9027	0.92	6	0.53	4	0.6	5	0.97	5	0.5	5	0.8	5	8	0.756667	0.683333	-0.0733333	0.595739	0.867649	1	11427900	11428218	AluSx	+	S	x	31	0.74	5	0.35	0.34	1	0.04	0.44	1897	154	6	35	319	8	161	5.02	50.47	0.4
9050	0.75	4	1	5	0.77	4	0.75	4	0.67	6	1	3	8	0.806667	0.84	0.0333333	0.914643	0.995471	1	11442504	11442814	AluSz6	-	S	z6	0	0	3	0.14	0.42	3	0.11	0.47	2342	122	0	0	311	8	159	5.14	51.13	0.4
9063	0.4	3	0.67	3	0.31	6	0.5	5	1	4	0.83	3	6	0.776667	0.46	-0.316667	0.133909	0.54493	1	11454423	11454723	AluJr	+	J	r	16	1	4	0.12	0.52	6	0.3	0.4	1859	146	0	10	301	6	155	3.99	51.5	0.31
9100	0.58	3	0.46	4	0.79	4	0.95	3	0.97	4	0.9	3	7	0.94	0.61	-0.33	0.00881073	0.273076	1	11492409	11492699	AluJb	-	J	b	0	0	12	0.38	0.51	4	0.12	0.52	1773	148	41	0	291	7	149	4.81	51.2	0.37
9101	0.82	8	0.85	9	0.78	8	0.89	3	0.75	8	0.94	9	9	0.86	0.816667	-0.0433333	0.420026	0.759632	1	11493409	11493722	AluJb	-	J	b	0	0	4	0.17	0.47	6	0.19	0.51	1782	159	0	35	314	9	160	5.73	50.96	0.44
9124	0.83	6	0.81	8	0.42	6	0.78	6	0.83	7	0.74	8	8	0.783333	0.686667	-0.0966667	0.562074	0.851168	1	11518073	11518331	AluSz	+	S	z	0	0	8	0.31	0.47	12	0.35	0.53	1943	100	4	12	259	8	138	6.18	53.28	0.44
9160	0.92	6	0.87	6	0.88	6	0.97	6	0.88	6	0.97	6	6	0.94	0.89	-0.05	0.17653	0.605286	1	11546743	11547035	AluJo	-	J	o	0	0	7	0.23	0.5	7	0.21	0.54	1831	171	14	3	293	6	156	4.1	53.24	0.29
9203	0.78	3	0.25	4	0.5	4	0.92	4	0.73	5	0.89	6	7	0.846667	0.51	-0.336667	0.0643633	0.500778	1	11599390	11599659	AluSz6	+	S	z6	3	1	9	0.24	0.55	10	0.26	0.55	1643	163	59	4	270	7	142	5.19	52.59	0.38
9224	0.8	5	0.25	4	0.46	4	0.92	7	0.42	6	0.67	6	12	0.67	0.503333	-0.166667	0.401259	0.750069	1	11622440	11622741	AluSx	+	S	x	30	0.87	0	0	0.37	6	0.2	0.5	2059	106	33	0	302	12	167	7.95	55.3	0.52
9240	0.83	3	0.37	3	0.67	3	0.93	3	0.82	3	0.81	3	3	0.853333	0.623333	-0.23	0.126302	0.532593	1	11636836	11636935	AluJb	+	J	b	1	1	14	0.34	0.58	14	0.41	0.52	1638	148	43	54	100	3	59	6	59	0.35
9243	1	4	1	6	1	5	1	6	0.86	7	0.67	5	10	0.843333	1	0.156667	0.082797	0.500778	1	11638659	11638955	AluSz	+	S	z	21	0.81	11	0.33	0.52	2	0.11	0.39	1901	138	17	0	297	10	156	6.73	52.53	0.49
9301	0.63	5	0.84	6	0.23	5	0.91	5	0.57	7	0.75	6	11	0.743333	0.566667	-0.176667	0.376308	0.735486	1	11686984	11687282	AluSq2	-	S	q2	0	0	5	0.2	0.46	4	0.13	0.5	2215	114	3	3	299	11	155	7.36	51.84	0.55
9305	0.33	3	0.5	3	0.53	5	0.77	5	0.93	6	0.8	5	7	0.833333	0.453333	-0.38	0.0148867	0.324152	1	11690523	11690834	AluJb	-	J	b	0	0	4	0.1	0.57	7	0.25	0.47	1653	202	6	26	312	7	161	4.49	51.6	0.34
9321	0.6	5	0.57	7	1	4	0.46	6	0.4	5	0.84	5	9	0.566667	0.723333	0.156667	0.354229	0.724797	1	11699786	11700089	AluSz	+	S	z	23	1	2	0.08	0.44	7	0.25	0.47	2333	112	3	0	304	9	155	5.92	50.99	0.46
9328	0.79	6	0.61	4	0.7	6	0.71	6	0.79	5	0.78	6	7	0.76	0.7	-0.06	0.51694	0.823521	1	11704243	11704542	AluSz	+	S	z	17	1	7	0.25	0.48	9	0.3	0.49	2198	123	0	7	300	7	151	4.67	50.33	0.37
9337	0.95	5	0.89	6	0.74	3	0.75	6	0.96	5	0.81	6	8	0.84	0.86	0.02	0.887785	0.98889	1	11711762	11712054	AluSx	-	S	x	0	0	6	0.2	0.5	3	0.09	0.5	1846	85	65	55	293	8	153	5.46	52.22	0.41
9346	1	4	1	3	1	4	1	4	0.96	4	1	4	13	0.986667	1	0.0133333	0.407681	0.750069	1	11716522	11716819	AluSx1	-	S	x1	0	0	10	0.32	0.5	2	0.09	0.42	2443	70	0	3	298	13	163	8.72	54.7	0.6
9356	0.73	4	0.82	6	0.71	4	0.83	6	1	5	0.75	4	6	0.86	0.753333	-0.106667	0.252965	0.69829	1	11720838	11721139	AluJo	-	J	o	0	0	9	0.3	0.49	19	0.39	0.63	1630	179	33	23	302	6	153	3.97	50.66	0.33
9362	0.84	7	1	3	0.83	3	1	6	0.93	5	0.92	6	16	0.95	0.89	-0.06	0.607199	0.874656	1	11725612	11725915	AluSg	-	S	g	0	0	24	0.61	0.56	7	0.29	0.44	2412	89	0	0	304	16	164	10.53	53.95	0.73
9365	1	4	0.94	6	0.94	6	1	6	0.98	6	1	5	6	0.993333	0.96	-0.0333333	0.185725	0.617873	1	11726251	11726422	AluJr	-	J	r	0	0	12	0.49	0.44	11	0.33	0.52	825	209	12	17	172	6	96	6.98	55.81	0.45
9370	1	3	0.81	3	0.83	3	0.78	3	0.92	3	1	3	3	0.9	0.88	-0.02	0.865242	0.982367	1	11728459	11728621	AluJo	-	J	o	0	0	7	0.3	0.44	17	0.37	0.61	1084	153	6	0	163	3	88	3.68	53.99	0.25
9371	0.92	3	1	5	1	4	0.95	5	0.92	3	0.8	6	9	0.89	0.973333	0.0833333	0.0955868	0.500778	1	11729246	11729539	AluSq2	+	S	q2	16	1	17	0.44	0.57	11	0.49	0.43	2088	112	10	10	294	9	157	6.12	53.4	0.43
9373	1	3	1	3	1	3	1	3	1	3	1	6	12	1	1	0	1	1	1	11729989	11730285	AluY	+	Y	None	16	1	7	0.38	0.39	6	0.17	0.54	2467	64	0	3	297	12	164	8.08	55.22	0.54
9396	0.6	5	0.42	5	0.42	4	0.72	3	0.88	4	0.72	6	9	0.773333	0.48	-0.293333	0.0360473	0.426804	1	11746498	11746759	AluSz	-	S	z	0	0	6	0.2	0.5	4	0.2	0.4	1385	160	134	11	262	9	143	6.87	54.58	0.47
9428	1	5	1	3	0.83	6	0.5	6	1	6	0.4	5	12	0.633333	0.943333	0.31	0.238079	0.680115	1	11769962	11770262	AluSg	+	S	g	21	0.95	6	0.16	0.55	12	0.36	0.53	2373	100	0	0	301	12	162	7.97	53.82	0.56
9429	0.61	4	0	3	0.59	3	1	3	0.83	3	0.81	4	5	0.88	0.4	-0.48	0.0726246	0.500778	1	11770267	11770566	AluJb	+	J	b	15	0.8	14	0.46	0.5	13	0.51	0.45	1986	157	0	10	300	5	156	3.33	52	0.25
9436	0.75	4	0.85	4	0.65	5	0.92	5	1	5	0.81	6	8	0.91	0.75	-0.16	0.118972	0.522861	1	11773816	11774108	AluSg7	+	S	g7	29	0.83	14	0.38	0.54	15	0.37	0.57	2225	89	51	0	293	8	147	5.46	50.17	0.44
9442	0.69	4	0.43	4	0.57	3	0.62	4	0.69	4	0.64	4	4	0.65	0.563333	-0.0866667	0.45108	0.780407	1	11776729	11776848	AluJr	-	J	r	0	0	8	0.42	0.4	7	0.27	0.46	775	150	8	0	120	4	62	6.67	51.67	0.5
9462	0.8	5	0.74	7	0.69	6	1	6	0.75	5	1	6	10	0.916667	0.743333	-0.173333	0.0738431	0.500778	1	11791017	11791318	AluSg	+	S	g	22	0.86	7	0.24	0.49	4	0.17	0.44	2227	126	0	0	302	10	164	6.62	54.3	0.45
9477	0.81	3	1	3	1	3	1	3	0.71	4	1	3	8	0.903333	0.936667	0.0333333	0.901672	0.99295	1	11799326	11799625	AluSz	+	S	z	17	0.88	7	0.21	0.51	9	0.25	0.53	2290	103	0	3	300	8	160	5.33	53.33	0.38
9512	0.77	8	0.92	4	0.36	4	0.79	6	0.6	5	1	3	9	0.796667	0.683333	-0.113333	0.46095	0.783827	1	11823215	11823516	AluSx	+	S	x	17	1	7	0.2	0.55	11	0.31	0.55	2022	122	10	20	302	9	167	5.96	55.3	0.4
9526	0.44	6	0.59	5	0.23	4	0.62	4	0.58	4	0.88	4	10	0.693333	0.42	-0.273333	0.113883	0.518136	1	11833483	11833794	AluSz	+	S	z	30	0.73	11	0.4	0.48	5	0.23	0.41	2402	103	0	0	312	10	156	6.41	50	0.52
9540	0.54	7	0.62	6	0.78	6	0.71	6	0.52	7	0.88	4	11	0.703333	0.646667	-0.0566667	0.608924	0.875716	1	11841055	11841354	AluSx1	-	S	x1	0	0	4	0.11	0.55	16	0.51	0.5	2348	87	20	0	300	11	160	7.33	53.33	0.52
9546	0.44	3	0.4	4	0.68	5	0.62	4	0.67	4	0.8	5	8	0.696667	0.506667	-0.19	0.163797	0.586703	1	11846484	11846800	AluJo	-	J	o	0	0	6	0.25	0.44	5	0.17	0.49	1900	151	3	38	317	8	164	5.05	51.74	0.39
9565	1	5	1	6	1	3	0.83	6	1	5	1	5	7	0.943333	1	0.0566667	0.323295	0.723448	1	11869504	11869814	AluSx	-	S	x	0	0	7	0.26	0.47	2	0.17	0.31	2117	142	0	16	311	7	164	4.5	52.73	0.33
9567	0.72	5	0.8	5	0.87	5	1	6	0.83	5	0.9	5	8	0.91	0.796667	-0.113333	0.175937	0.604132	1	11870987	11871275	AluJo	+	J	o	12	0.92	5	0.21	0.43	13	0.49	0.46	1727	163	17	7	289	8	159	5.54	55.02	0.37
9582	1	3	1	7	0.83	4	0.93	5	0.93	5	0.79	7	9	0.883333	0.943333	0.06	0.205463	0.641614	1	11883266	11883555	AluSp	+	S	p	21	0.95	5	0.18	0.47	14	0.39	0.53	1902	114	0	69	290	9	140	6.21	48.28	0.54
9602	0.88	4	0.75	4	0.65	4	0.97	4	1	3	0.78	3	4	0.916667	0.76	-0.156667	0.105633	0.506836	1	11910798	11911080	AluJb	+	J	b	13	0.85	13	0.43	0.5	8	0.25	0.51	1684	180	46	3	283	4	146	2.83	51.59	0.21
9605	0.75	4	0.62	4	0.69	6	0.6	5	0.67	6	1	5	6	0.756667	0.686667	-0.07	0.40061	0.750069	1	11912240	11912545	AluJb	-	J	b	0	0	4	0.13	0.5	5	0.17	0.48	1517	169	55	22	306	6	136	3.92	44.44	0.41
9627	0.73	5	0.71	4	0.5	4	0.8	5	0.93	5	0.95	5	6	0.893333	0.646667	-0.246667	0.0332921	0.419091	1	11926421	11926708	AluJr	-	J	r	0	0	12	0.42	0.48	6	0.2	0.5	1944	156	3	0	288	6	155	4.17	53.82	0.3
9629	0.52	3	0.46	4	0.47	5	0.8	4	0.62	4	0.77	5	5	0.73	0.483333	-0.246667	0.0425658	0.446658	1	11927546	11927804	AluJo	+	J	o	20	0.8	9	0.27	0.51	4	0.15	0.47	1278	174	170	23	259	5	132	3.86	50.97	0.3
9638	0.93	3	0.89	4	0.55	3	1	3	1	4	0.83	3	5	0.943333	0.79	-0.153333	0.133283	0.54369	1	11933242	11933576	AluJb	-	J	b	0	0	5	0.2	0.45	2	0.08	0.44	1982	116	0	92	335	5	172	2.99	51.34	0.23
9652	0.77	9	0.61	8	0.61	9	0.82	8	0.83	10	0.8	6	14	0.816667	0.663333	-0.153333	0.101413	0.503913	1	11950469	11950755	AluY	+	Y	None	23	1	7	0.25	0.48	7	0.26	0.48	2271	66	59	0	287	14	164	9.76	57.14	0.6
9664	0.55	4	0.93	3	0.49	5	0.7	5	1	3	0.67	3	5	0.79	0.656667	-0.133333	0.436092	0.77129	1	11956610	11956743	AluJr	+	J	r	11	0.91	9	0.39	0.43	9	0.36	0.45	770	127	179	8	134	5	77	7.46	57.46	0.46
9682	0.95	7	1	5	0.92	6	1	6	1	4	0.86	7	14	0.953333	0.956667	0.00333333	0.752256	0.941157	1	11966515	11966818	AluSx	-	S	x	0	0	12	0.32	0.56	10	0.23	0.58	2309	102	0	0	304	14	165	9.21	54.28	0.63
9685	0	7	0	9	0.17	6	0.24	7	0	6	0	4	21	0.08	0.0566667	-0.0233333	0.918688	0.996731	1	11969244	11969563	AluSx	+	S	x	27	1	23	0.55	0.58	21	0.73	0.49	2515	56	0	34	320	21	177	13.13	55.31	0.86
9697	1	5	1	5	0.95	4	0.95	5	0.95	5	1	6	7	0.966667	0.983333	0.0166667	0.492122	0.806138	1	11977217	11977532	AluSx	+	S	x	30	1	11	0.31	0.53	15	0.44	0.53	2374	101	0	13	316	7	161	4.43	50.95	0.34
9700	0.5	3	0.5	3	1	5	0.69	4	1	3	0.88	4	11	0.856667	0.666667	-0.19	0.597724	0.868811	1	11978481	11978773	AluSp	-	S	p	0	0	9	0.28	0.51	11	0.31	0.54	2329	85	3	0	293	11	160	7.51	54.61	0.51
9705	0.21	4	0.48	4	0.9	5	1	4	0.8	5	1	5	5	0.933333	0.53	-0.403333	0.0522877	0.474365	1	11984240	11984309	AluYc	+	Y	c	1	1	7	0.23	0.5	8	0.3	0.47	599	57	0	0	70	5	45	14.29	64.29	0.71
9732	1	3	1	4	1	5	1	5	0.9	5	0.97	6	9	0.956667	1	0.0433333	0.14189	0.554711	1	11995683	11995979	AluSg	-	S	g	0	0	5	0.17	0.49	7	0.18	0.56	2334	101	0	0	297	9	156	6.06	52.53	0.44
9747	1	4	1	4	1	4	1	5	1	5	1	4	8	1	1	0	1	1	1	12001552	12001838	AluSq2	-	S	q2	0	0	7	0.31	0.43	6	0.19	0.5	2125	108	3	14	287	8	148	5.57	51.57	0.42
9751	1	8	0.8	5	0.67	6	0.92	6	1	6	0.94	7	11	0.953333	0.823333	-0.13	0.434782	0.770337	1	12003344	12003653	AluSq2	-	S	q2	0	0	8	0.23	0.53	7	0.2	0.54	2357	113	0	0	310	11	160	7.1	51.61	0.54
9767	0.94	11	0.98	15	0.9	13	1	3	0.96	13	0.93	14	17	0.963333	0.94	-0.0233333	0.525369	0.8289	1	12013118	12013411	AluSx	-	S	x	0	0	11	0.27	0.58	7	0.24	0.49	2136	129	0	0	294	17	158	11.56	53.74	0.8
9771	0.75	4	1	4	1	4	1	3	1	4	1	3	6	1	0.916667	-0.0833333	0.315609	0.723448	1	12013927	12014221	AluJb	-	J	b	0	0	6	0.21	0.48	17	0.52	0.52	1943	159	7	3	295	6	151	4.07	51.19	0.31
9784	0.67	3	1	4	1	4	0.88	4	0.83	6	1	4	11	0.903333	0.89	-0.0133333	0.6999	0.918133	1	12019979	12020326	AluSg7	-	S	g7	0	0	15	0.46	0.51	10	0.24	0.59	2119	78	0	124	348	11	184	6.32	52.87	0.46
9788	1	3	1	4	0.8	5	1	4	1	3	0.78	6	11	0.926667	0.933333	0.00666667	0.977535	1	1	12021842	12022143	AluSz	-	S	z	0	0	4	0.15	0.46	13	0.47	0.47	2054	118	0	0	302	11	156	7.28	51.66	0.55
9813	0.72	6	0.54	3	0.72	4	0.94	4	0.68	6	0.43	3	6	0.683333	0.66	-0.0233333	0.668027	0.904668	1	12036034	12036209	AluSx	-	S	x	0	0	11	0.34	0.51	9	0.34	0.46	1147	114	40	28	176	6	92	6.82	52.27	0.5
9820	0.71	8	0.72	9	0.8	8	0.83	9	0.91	10	0.9	7	13	0.88	0.743333	-0.136667	0.063049	0.500778	1	12039319	12039585	AluSg	-	S	g	0	0	5	0.2	0.45	18	0.52	0.52	1865	94	112	0	267	13	143	9.74	53.56	0.69
9821	0.67	9	0.07	8	0.64	7	0.67	6	1	6	0.69	6	13	0.786667	0.46	-0.326667	0.150044	0.565547	1	12041280	12041526	AluSx	+	S	x	0	0	14	0.46	0.5	7	0.26	0.47	1895	73	28	0	247	13	149	10.53	60.32	0.58
9822	0.82	7	0.94	8	0.77	5	0.92	6	0.67	6	0.78	6	10	0.79	0.843333	0.0533333	0.626157	0.883309	1	12043096	12043427	AluY	-	Y	None	0	0	4	0.17	0.43	5	0.18	0.49	2088	88	3	54	332	10	175	6.02	52.71	0.43
9826	1	5	0.8	5	1	5	1	5	1	3	0.72	5	7	0.906667	0.933333	0.0266667	0.921643	0.997998	1	12047085	12047399	AluSz	+	S	z	31	0.84	7	0.25	0.47	10	0.32	0.51	2125	121	9	22	315	7	157	4.44	49.84	0.37
9841	1	5	0.95	5	1	5	1	5	1	5	1	5	5	1	0.983333	-0.0166667	0.382679	0.735821	1	12055023	12055334	AluJr	+	J	r	15	0.73	4	0.14	0.49	8	0.27	0.49	1661	139	9	88	312	5	154	3.21	49.36	0.27
9843	0.8	5	1	6	1	5	1	4	1	5	0.9	5	10	0.966667	0.933333	-0.0333333	0.829106	0.969524	1	12056813	12057117	AluSx1	+	S	x1	22	0.95	6	0.18	0.52	4	0.12	0.51	2430	92	0	3	305	10	160	6.56	52.46	0.49
9847	0.94	3	1	3	1	3	1	3	1	3	0.94	3	3	0.98	0.98	0	1	1	1	12059783	12059864	FLAM_A	+	FLAM_A	None	11	0.91	5	0.18	0.48	20	0.62	0.51	423	219	37	0	82	3	37	7.32	45.12	0.72
9856	0.94	9	0.87	5	0.88	9	0.85	9	0.96	8	0.98	9	10	0.93	0.896667	-0.0333333	0.334699	0.723448	1	12065141	12065439	AluSz6	-	S	z6	0	0	7	0.19	0.54	6	0.17	0.53	2025	141	3	7	299	10	159	6.69	53.18	0.47
9865	0.93	5	0.97	5	0.88	4	0.83	6	0.93	5	1	6	7	0.92	0.926667	0.00666667	0.80351	0.961232	1	12075692	12075978	AluJb	-	J	b	0	0	11	0.37	0.49	5	0.18	0.47	1874	146	38	11	287	7	136	4.88	47.39	0.43
9871	0.85	5	1	3	0.88	4	0.92	4	0.88	5	0.77	5	5	0.856667	0.91	0.0533333	0.366604	0.72739	1	12078124	12078212	AluSz	-	S	z	0	0	14	0.52	0.46	12	0.43	0.47	578	135	0	0	89	5	58	11.24	65.17	0.55
9879	0.76	8	0.96	6	0.95	5	0.81	7	1	4	0.9	7	17	0.903333	0.89	-0.0133333	0.767542	0.948148	1	12080735	12081031	AluSx	-	S	x	0	0	6	0.21	0.48	13	0.43	0.49	2210	104	0	7	297	17	170	11.45	57.24	0.71
9885	0.8	5	0.68	4	0.95	5	1	4	0.67	7	1	4	11	0.89	0.81	-0.08	0.263898	0.710388	1	12083430	12083733	AluYc	-	Y	c	0	0	12	0.31	0.56	15	0.5	0.49	1715	89	89	39	304	11	144	7.24	47.37	0.65
9886	0.93	5	1	5	1	4	1	4	1	3	0.87	5	11	0.956667	0.976667	0.02	0.830518	0.970335	1	12083771	12084074	AluSg	+	S	g	23	0.78	15	0.55	0.47	11	0.38	0.48	2364	99	0	0	304	11	160	7.24	52.63	0.53
9893	0.86	7	0.96	10	1	8	0.98	9	0.94	4	0.92	4	11	0.946667	0.94	-0.00666667	0.851599	0.977638	1	12087987	12088281	AluSz6	+	S	z6	18	0.89	6	0.22	0.49	10	0.28	0.55	2169	112	17	0	295	11	160	7.46	54.24	0.52
9898	1	4	0.9	5	0.93	5	0.93	5	0.75	4	0.33	3	6	0.67	0.943333	0.273333	0.102806	0.505792	1	12092879	12093178	AluJb	-	J	b	0	0	6	0.2	0.5	6	0.36	0.37	1882	157	3	20	300	6	153	4	51	0.31
9902	1	3	0.44	6	0.93	3	0.75	6	0.8	4	0.83	3	7	0.793333	0.79	-0.00333333	0.477657	0.796622	1	12094839	12095131	AluSz6	-	S	z6	0	0	8	0.28	0.48	7	0.19	0.55	2055	130	31	0	293	7	148	4.78	50.51	0.38
9927	0.96	4	0.89	4	1	4	0.87	4	0.95	4	1	4	4	0.94	0.95	0.01	0.890218	0.989146	1	12113311	12113478	AluJr	-	J	r	0	0	8	0.22	0.54	9	0.25	0.54	1068	167	0	12	168	4	89	4.76	52.98	0.34
9935	0.8	5	0.75	4	0.75	4	1	5	0.8	5	0.58	6	6	0.793333	0.766667	-0.0266667	0.464975	0.787052	1	12119095	12119404	AluSz	+	S	z	28	0.89	2	0.06	0.52	8	0.2	0.57	2324	110	3	3	310	6	156	3.87	50.32	0.31
9942	0.94	4	0.75	4	0.89	3	0.88	4	0.95	4	0.58	4	7	0.803333	0.86	0.0566667	0.79813	0.959186	1	12127464	12127746	AluSx1	+	S	x1	21	0.71	7	0.24	0.48	9	0.3	0.5	2011	120	53	0	283	7	152	4.95	53.71	0.35
9952	0.95	5	0.46	6	0.35	6	0.94	6	1	6	0.87	5	7	0.936667	0.586667	-0.35	0.107145	0.50833	1	12133063	12133344	AluJb	+	J	b	25	0.76	10	0.23	0.59	12	0.46	0.49	1476	143	120	23	282	7	158	4.96	56.03	0.32
9959	0.75	6	0.3	7	0.7	8	0.92	8	0.93	8	0.79	7	8	0.88	0.583333	-0.296667	0.0529015	0.476468	1	12137014	12137280	AluJb	-	J	b	0	0	8	0.23	0.53	3	0.1	0.5	1580	146	94	26	267	8	149	5.99	55.81	0.39
9978	0.56	3	0.78	4	0.3	4	0.45	4	0.94	4	0.88	4	4	0.756667	0.546667	-0.21	0.239953	0.681886	1	12154140	12154196	AluSz	-	S	z	0	0	13	0.39	0.52	3	0.12	0.47	477	70	0	0	57	4	37	14.04	64.91	0.71
9979	0.92	8	0.77	5	0.67	3	1	4	0.8	5	0.67	3	13	0.823333	0.786667	-0.0366667	0.533296	0.833337	1	12154671	12154981	AluSz	-	S	z	0	0	6	0.21	0.5	10	0.45	0.42	2504	84	0	0	311	13	157	8.36	50.48	0.66
9988	1	5	1	4	1	5	1	3	1	5	0.83	6	11	0.943333	1	0.0566667	0.323295	0.723448	1	12161732	12162030	AluSx	-	S	x	0	0	6	0.23	0.46	12	0.37	0.51	2258	87	30	10	299	11	158	7.36	52.84	0.53
10001	0.75	4	0.75	4	0.25	4	0.79	4	1	3	1	4	12	0.93	0.583333	-0.346667	0.0407598	0.441125	1	12171228	12171538	AluSx1	-	S	x1	0	0	13	0.47	0.47	9	0.2	0.6	2366	100	3	0	311	12	170	7.72	54.66	0.52
10011	0.88	8	0.83	8	0.69	6	1	3	1	6	0.83	6	15	0.943333	0.8	-0.143333	0.0751825	0.500778	1	12178900	12179220	AluSg	-	S	g	0	0	11	0.41	0.47	4	0.16	0.45	2324	79	0	3	321	15	173	9.35	53.89	0.65
10024	1	5	1	6	0.92	6	1	6	0.97	4	1	6	9	0.99	0.973333	-0.0166667	0.672132	0.906399	1	12189952	12190267	AluSz	-	S	z	0	0	16	0.5	0.51	10	0.3	0.52	2191	114	0	19	316	9	171	5.7	54.11	0.39
10032	0.75	4	1	3	1	6	1	3	1	5	1	4	9	1	0.916667	-0.0833333	0.315609	0.723448	1	12195092	12195394	AluSx3	+	S	x3	22	0.91	12	0.32	0.56	8	0.17	0.61	2270	112	0	3	303	9	158	5.94	52.15	0.44
10063	0.83	6	0.79	8	0.87	5	0.94	8	0.92	6	0.9	7	9	0.92	0.83	-0.09	0.0745638	0.500778	1	12226350	12226642	AluJr	+	J	r	22	0.82	6	0.19	0.5	35	0.72	0.65	1665	109	106	68	293	9	157	6.14	53.58	0.44
10080	1	3	0.95	3	1	3	0.79	4	0.94	4	1	3	5	0.91	0.983333	0.0733333	0.295445	0.723448	1	12240205	12240339	AluJr4	+	J	r4	0	0	10	0.29	0.52	13	0.32	0.57	943	126	0	7	135	5	72	7.41	53.33	0.52
10105	0.83	3	0.88	4	1	3	1	3	0.96	4	0.94	4	4	0.966667	0.903333	-0.0633333	0.464883	0.787022	1	12261032	12261347	AluJo	+	J	o	30	0.9	7	0.24	0.49	1	0.04	0.44	1976	158	0	25	316	4	158	2.53	50	0.2
10109	0.86	9	0.9	10	1	5	1	5	1	5	0.88	7	14	0.96	0.92	-0.04	0.470144	0.790785	1	12263783	12264086	AluSx	-	S	x	0	0	8	0.18	0.6	7	0.17	0.59	2014	128	3	40	304	14	168	9.21	55.26	0.6
10112	0.83	6	0.95	5	1	5	0.78	6	1	6	0.83	3	7	0.87	0.926667	0.0566667	0.665148	0.903196	1	12266163	12266445	AluSz	+	S	z	29	0.83	10	0.32	0.51	8	0.21	0.56	1494	201	99	0	283	7	147	4.95	51.94	0.38
10118	0.83	3	0.35	5	0.51	3	0.83	4	0.75	4	0.36	4	6	0.646667	0.563333	-0.0833333	0.686115	0.911934	1	12270323	12270598	AluJb	-	J	b	0	0	8	0.25	0.5	9	0.25	0.53	1375	196	98	18	276	6	135	4.35	48.91	0.36
10123	0.67	3	0.73	7	0.9	5	0.89	6	1	5	0.67	3	10	0.853333	0.766667	-0.0866667	0.335904	0.723448	1	12273625	12273915	AluJr	+	J	r	22	1	9	0.35	0.46	9	0.38	0.44	1980	131	48	3	291	10	157	6.87	53.95	0.48
10126	0.96	4	0.57	6	0.94	6	0.96	6	1	6	0.97	6	6	0.976667	0.823333	-0.153333	0.123367	0.528202	1	12276998	12277167	AluJb	+	J	b	0	0	4	0.13	0.51	16	0.49	0.51	747	147	5	203	170	6	99	7.06	58.24	0.43
10151	0.78	9	0.97	8	0.85	10	0.86	7	0.84	9	0.86	8	11	0.853333	0.866667	0.0133333	0.577889	0.858614	1	12291764	12292062	AluSx1	+	S	x1	10	0.9	5	0.21	0.44	2	0.12	0.38	2114	107	3	23	299	11	167	7.36	55.85	0.47
10163	0.97	4	0.91	4	0.94	4	1	4	0.94	4	1	4	4	0.98	0.94	-0.04	0.156409	0.576367	1	12298687	12298986	AluJo	-	J	o	0	0	0	0	0.36	4	0.15	0.46	1892	150	10	13	300	4	147	2.67	49	0.22
10172	0.86	7	1	5	1	4	0.9	5	1	7	0.8	5	11	0.9	0.953333	0.0533333	0.46326	0.785714	1	12307215	12307486	AluSz	+	S	z	13	1	6	0.3	0.41	11	0.57	0.39	1991	96	37	15	272	11	146	8.09	53.68	0.57
10183	0.58	6	0.67	3	0.4	5	0.69	5	1	5	1	3	12	0.896667	0.55	-0.346667	0.0408612	0.441125	1	12315001	12315301	AluSx	-	S	x	0	0	9	0.39	0.43	7	0.43	0.37	2433	90	0	0	301	12	162	7.97	53.82	0.55
10236	1	4	1	5	0.95	3	1	4	0.95	4	1	4	5	0.983333	0.983333	0	1	1	1	12373357	12373539	AluSx3	-	S	x3	0	0	8	0.35	0.43	5	0.26	0.4	1164	148	6	6	183	5	92	5.46	50.27	0.45
10242	1	4	1	3	0.97	4	0.96	4	1	3	0.94	3	11	0.966667	0.99	0.0233333	0.329199	0.723448	1	12382115	12382371	AluY	-	Y	None	0	0	8	0.33	0.44	5	0.26	0.4	1966	60	0	4	257	11	136	8.56	52.92	0.61
10259	0.92	3	1	4	0.93	3	0.95	4	0.96	3	0.96	3	4	0.956667	0.95	-0.00666667	0.880992	0.986738	1	12394542	12394844	AluJr	+	J	r	22	0.73	2	0.14	0.34	7	0.34	0.41	1764	191	10	3	303	4	147	2.64	48.51	0.23
10269	1	5	1	4	1	7	1	6	1	4	1	4	13	1	1	0	1	1	1	12413309	12413613	AluY	+	Y	None	24	1	2	0.11	0.39	1	0.08	0.31	2538	79	0	0	305	13	161	8.52	52.79	0.62
10270	1	3	0.95	4	0.72	3	1	4	0.96	3	1	3	4	0.986667	0.89	-0.0966667	0.26705	0.713873	1	12414452	12414604	FRAM	+	FRAM	None	12	0.92	1	0.06	0.36	4	0.23	0.37	972	176	0	13	153	4	76	5.23	49.67	0.42
10274	1	3	1	3	1	3	0.67	3	1	4	1	4	9	0.89	1	0.11	0.311311	0.723448	1	12417785	12418075	AluSg	+	S	g	16	1	3	0.13	0.44	3	0.15	0.4	2225	103	17	0	291	9	156	6.19	53.61	0.43
10282	1	9	1	7	0.73	11	1	6	0.88	8	1	7	15	0.96	0.91	-0.05	0.809452	0.962036	1	12427648	12427960	AluY	-	Y	None	0	0	4	0.27	0.35	6	0.34	0.38	1993	89	0	105	313	15	180	9.58	57.51	0.58
10297	0.82	4	0.85	4	0.94	3	0.84	3	1	3	0.92	4	9	0.92	0.87	-0.05	0.354368	0.724797	1	12442158	12442458	AluSq2	-	S	q2	0	0	3	0.2	0.39	0	0	0.32	2272	113	10	0	301	9	157	5.98	52.16	0.45
10324	1	3	0.67	3	0.67	3	0.83	4	0.75	4	1	3	5	0.86	0.78	-0.08	0.787508	0.954935	1	12481887	12482181	AluSz	-	S	z	0	0	1	0.06	0.37	1	0.09	0.3	1987	112	14	34	295	5	153	3.39	51.86	0.26
10350	1	5	0.6	5	0.72	5	0.63	5	0.49	7	0.82	5	8	0.646667	0.773333	0.126667	0.334879	0.723448	1	12509899	12510188	AluSx	+	S	x	31	0.55	4	0.23	0.38	8	0.35	0.43	1987	138	7	3	290	8	158	5.52	54.48	0.37
10360	1	4	0.93	5	1	6	0.83	6	0.76	7	1	5	14	0.863333	0.976667	0.113333	0.247053	0.691336	1	12519525	12519831	AluSc	-	S	c	0	0	8	0.4	0.4	7	0.31	0.42	2489	81	7	0	307	14	161	9.12	52.44	0.67
10378	1	6	0.86	7	0.96	7	0.9	7	1	4	1	4	12	0.966667	0.94	-0.0266667	0.58304	0.861324	1	12555204	12555511	AluY	-	Y	None	0	0	5	0.19	0.47	7	0.26	0.47	2333	71	3	32	308	12	167	7.79	54.22	0.54
10386	0.93	5	0.9	5	0.7	5	1	4	1	8	1	4	15	1	0.843333	-0.156667	0.00382323	0.207501	1	12568478	12568761	AluSc8	+	S	c8	16	1	8	0.24	0.51	14	0.39	0.53	2023	70	78	32	284	15	147	10.56	51.76	0.79
10394	0.79	9	0.95	10	1	10	0.96	4	0.81	8	0.95	9	13	0.906667	0.913333	0.00666667	0.680909	0.909492	1	12576718	12577019	AluSx1	-	S	x1	0	0	10	0.3	0.52	4	0.35	0.3	2121	113	3	20	302	13	161	8.61	53.31	0.61
10395	0.92	3	1	5	0.93	5	0.65	5	1	5	0.79	5	8	0.813333	0.95	0.136667	0.446509	0.778963	1	12577694	12577972	AluSz	-	S	z	0	0	4	0.41	0.28	9	0.35	0.46	2078	97	21	7	279	8	154	5.73	55.2	0.38
10396	1	5	0.96	5	0.94	6	1	5	0.97	5	0.97	6	7	0.98	0.966667	-0.0133333	0.629023	0.884562	1	12578067	12578359	AluJb	+	J	b	29	0.93	8	0.37	0.42	11	0.45	0.44	1891	130	55	3	293	7	151	4.78	51.54	0.36
10398	1	5	1	4	0.94	4	1	5	0.9	5	1	4	5	0.966667	0.98	0.0133333	0.849389	0.977197	1	12580193	12580492	AluJb	+	J	b	11	1	8	0.25	0.53	17	0.53	0.52	1750	170	7	30	300	5	147	3.33	49	0.28
10400	1	3	0.67	4	1	5	0.8	5	0.83	3	0.93	5	9	0.853333	0.89	0.0366667	0.279229	0.723448	1	12581790	12582100	AluSq2	-	S	q2	0	0	6	0.28	0.41	8	0.34	0.44	2160	132	6	10	311	9	156	5.79	50.16	0.47
10416	0.89	3	0.93	3	0.9	5	1	4	1	4	0.95	4	7	0.983333	0.906667	-0.0766667	0.0287058	0.399389	1	12594915	12595195	AluJb	-	J	b	0	0	11	0.39	0.48	4	0.28	0.34	1954	149	0	4	281	7	150	4.98	53.38	0.36
10424	0.77	5	0.72	5	0.79	5	1	4	0.89	4	0.88	4	5	0.923333	0.76	-0.163333	0.0808508	0.500778	1	12603244	12603549	AluJo	+	J	o	29	0.9	2	0.1	0.41	7	0.49	0.34	1764	183	29	13	306	5	154	3.27	50.33	0.26
10425	0.2	3	0.74	4	0.68	4	0.78	3	0.86	4	0.74	4	4	0.793333	0.54	-0.253333	0.161518	0.583434	1	12604247	12604522	AluJr	-	J	r	0	0	9	0.49	0.38	8	0.53	0.35	1260	181	101	47	276	4	141	2.9	51.09	0.22
10451	0.83	6	0.93	4	0.4	5	0.89	3	0.93	5	0.86	5	6	0.893333	0.72	-0.173333	0.329296	0.723448	1	12626625	12626946	AluJo	+	J	o	30	0.87	11	0.36	0.5	7	0.19	0.54	1951	149	3	37	322	6	163	3.73	50.62	0.3
10468	0.89	3	1	4	1	4	0.86	7	0.93	5	1	5	11	0.93	0.963333	0.0333333	0.503594	0.813907	1	12637571	12637880	AluSx	+	S	x	30	0.73	12	0.43	0.48	10	0.33	0.5	2264	119	7	0	310	11	163	7.1	52.58	0.52
10486	1	4	0.8	5	0.93	3	0.85	4	0.75	4	0.75	6	14	0.783333	0.91	0.126667	0.137988	0.551932	1	12657109	12657389	AluSg4	-	S	g4	0	0	6	0.15	0.57	5	0.19	0.46	2327	60	0	7	281	14	166	9.96	59.07	0.58
10487	0.93	5	0.73	5	0.96	6	1	4	0.94	6	0.81	6	6	0.916667	0.873333	-0.0433333	0.532336	0.83272	1	12658205	12658415	AluJb	+	J	b	25	0.8	9	0.25	0.54	8	0.32	0.45	1258	175	62	0	211	6	106	5.69	50.24	0.45
10493	0.5	4	0.61	6	0.83	9	0.81	9	0.9	8	0.2	5	13	0.636667	0.646667	0.01	0.946113	1	1	12664774	12665103	AluSc	+	S	c	20	1	6	0.22	0.47	5	0.31	0.36	2120	67	15	109	330	13	174	7.88	52.73	0.57
10507	0.88	4	0.85	5	0.67	6	0.8	5	1	4	0.63	5	6	0.81	0.8	-0.01	0.575155	0.857152	1	12684016	12684325	AluJb	-	J	b	0	0	3	0.11	0.46	6	0.22	0.46	1669	174	10	29	310	6	157	3.87	50.65	0.3
10540	0.84	5	0.46	5	0.6	6	0.96	5	0.85	6	0.85	4	7	0.886667	0.633333	-0.253333	0.0703947	0.500778	1	12707110	12707417	AluJr	-	J	r	0	0	8	0.27	0.49	4	0.2	0.4	1945	140	0	16	308	7	159	4.55	51.62	0.35
10564	0.94	3	0.73	3	0.7	3	1	3	1	3	0.73	3	3	0.91	0.79	-0.12	0.17741	0.606687	1	12735617	12735906	AluJo	-	J	o	17	0.35	2	0.08	0.44	7	0.25	0.47	1762	186	0	10	290	3	140	2.07	48.28	0.18
10613	1	3	0.72	4	0.94	6	1	6	0.61	3	0.88	4	6	0.83	0.886667	0.0566667	0.778534	0.951084	1	12801587	12801716	AluSx	-	S	x	1	1	6	0.3	0.4	5	0.21	0.44	989	92	15	0	130	6	63	9.23	48.46	0.8
10616	0.5	4	0.54	4	0.8	5	0.96	5	0.65	4	0.57	5	5	0.726667	0.613333	-0.113333	0.403591	0.750069	1	12803242	12803533	AluJb	-	J	b	0	0	4	0.18	0.42	5	0.24	0.42	1935	164	0	0	292	5	148	3.42	50.68	0.27
10647	0.61	5	0.53	5	0.59	5	0.89	5	0.93	5	0.95	5	5	0.923333	0.576667	-0.346667	0.00211018	0.169301	1	12869757	12869860	AluSp	-	S	p	0	0	4	0.15	0.46	4	0.12	0.53	583	164	0	39	104	5	60	9.62	57.69	0.58
10653	0.83	6	1	5	0.53	6	1	6	0.75	5	0.77	7	9	0.84	0.786667	-0.0533333	0.900871	0.992584	1	12881918	12882174	AluSx3	-	S	x3	0	0	9	0.44	0.42	11	0.42	0.47	1706	136	43	0	257	9	140	7	54.47	0.47
10691	0.75	4	1	4	0.7	5	0.95	5	0.8	5	0.83	6	8	0.86	0.816667	-0.0433333	0.865031	0.982329	1	12913589	12913901	AluSx1	-	S	x1	0	0	1	0.06	0.35	9	0.39	0.43	1760	137	6	73	313	8	165	5.11	52.72	0.38
10698	0.88	3	0.72	3	0.85	3	0.67	3	0.96	3	0.76	3	5	0.796667	0.816667	0.02	0.881174	0.986782	1	12915894	12916169	AluSz	+	S	z	4	1	2	0.07	0.49	2	0.12	0.38	1801	152	4	4	276	5	142	3.62	51.45	0.28
10726	0.92	3	0.5	6	0.67	4	0.8	5	1	3	0.88	8	10	0.893333	0.696667	-0.196667	0.199573	0.633946	1	12948472	12948782	AluSc	+	S	c	30	0.73	1	0.05	0.39	5	0.27	0.38	1981	154	3	10	311	10	160	6.43	51.45	0.49
10939	0.39	3	0.1	3	0.07	3	0.48	3	0.67	3	0.67	3	3	0.606667	0.186667	-0.42	0.0225728	0.373435	1	13174924	13175209	AluSx1	+	S	x1	10	0.9	6	0.24	0.45	5	0.21	0.44	1678	175	0	21	286	3	144	2.1	50.35	0.17
11512	1	5	0.97	5	0.91	5	0.92	6	0.78	6	0.67	6	10	0.79	0.96	0.17	0.0494803	0.466926	1	13790640	13790882	AluSx1	-	S	x1	0	0	7	0.25	0.47	6	0.2	0.5	1867	91	0	0	243	10	138	8.23	56.79	0.52
11530	1	6	0.86	7	1	6	0.52	9	0.72	9	0.63	10	11	0.623333	0.953333	0.33	0.014358	0.321671	1	13808749	13809055	AluSx	+	S	x	20	0.95	1	0.04	0.48	5	0.13	0.56	1837	163	0	10	307	11	159	7.17	51.79	0.54
11536	0.94	8	0.78	6	0.62	4	0.94	8	0.81	6	1	8	12	0.916667	0.78	-0.136667	0.217071	0.656115	1	13811750	13812043	AluY	+	Y	None	24	0.83	13	0.42	0.5	10	0.3	0.52	2049	99	37	0	294	12	153	8.16	52.04	0.62
11584	0.75	4	0.93	7	0.67	8	1	6	0.97	6	0.86	7	11	0.943333	0.783333	-0.16	0.0966715	0.501285	1	13849945	13850255	AluSz	-	S	z	0	0	6	0.28	0.41	5	0.16	0.5	2157	151	0	0	311	11	162	7.07	52.09	0.54
11588	0.83	3	0.83	6	1	5	0.64	10	1	3	0.94	8	18	0.86	0.886667	0.0266667	0.970903	1	1	13852287	13852584	AluY	-	Y	None	0	0	4	0.15	0.46	6	0.24	0.45	2304	67	47	3	298	18	160	12.08	53.69	0.84
11596	1	6	0.83	5	0.71	7	0.33	6	1	4	0.29	8	17	0.54	0.846667	0.306667	0.4936	0.807364	1	13857357	13857661	AluY	+	Y	None	10	1	16	0.52	0.5	9	0.34	0.47	2441	43	0	46	305	17	172	11.15	56.39	0.71
11598	0.82	6	0.96	6	0.91	6	0.81	6	0.98	6	1	3	6	0.93	0.896667	-0.0333333	0.359115	0.726818	1	13858011	13858140	FLAM_C	-	FLAM_C	None	0	0	13	0.43	0.49	10	0.49	0.4	867	138	15	0	130	6	74	9.23	56.92	0.59
11599	0.9	5	0.38	4	0.7	5	0.97	5	1	7	0.95	6	8	0.973333	0.66	-0.313333	0.0189318	0.350745	1	13858541	13858826	AluSg	+	S	g	22	0.77	12	0.55	0.42	5	0.18	0.47	1913	136	31	7	286	8	142	5.59	49.65	0.46
11605	1	4	0.69	4	0.56	6	0.95	4	0.6	5	1	3	9	0.85	0.75	-0.1	0.650597	0.895779	1	13862753	13863039	AluSx	-	S	x	0	0	5	0.2	0.45	5	0.16	0.49	1996	101	87	7	287	9	154	6.27	53.66	0.44
11627	0.86	11	0.83	9	0.77	8	0.12	4	0.94	6	0.93	9	18	0.663333	0.82	0.156667	0.772115	0.948588	1	13879172	13879472	AluY	+	Y	None	12	1	7	0.31	0.43	4	0.3	0.33	2389	57	0	30	301	18	169	11.96	56.15	0.76
11635	0.9	5	0.64	5	0.5	5	0.75	4	0.69	4	0.62	7	7	0.686667	0.68	-0.00666667	0.856147	0.978311	1	13885462	13885753	AluSz	+	S	z	13	0.85	4	0.28	0.34	6	0.48	0.32	1830	147	24	14	292	7	159	4.79	54.45	0.33
11640	0.8	10	0.69	8	0.69	8	0.9	8	1	9	0.97	7	20	0.956667	0.726667	-0.23	0.0158971	0.330714	1	13901056	13901397	AluY	-	Y	None	0	0	11	0.41	0.47	3	0.14	0.42	2306	51	0	31	342	20	174	11.7	50.88	0.91
11643	0.48	3	0.25	3	0.67	3	0.65	3	0.4	3	0.39	3	9	0.48	0.466667	-0.0133333	0.905635	0.994506	1	13904809	13905111	AluSc	+	S	c	27	0.67	10	0.3	0.52	8	0.26	0.5	2298	76	0	0	303	9	153	5.94	50.5	0.47
11648	0.85	10	0.81	12	0.43	7	0.63	10	0.89	11	0.91	11	14	0.81	0.696667	-0.113333	0.43117	0.767761	1	13913281	13913565	AluSx4	+	S	x4	21	0.76	6	0.3	0.4	6	0.34	0.38	2019	102	60	0	285	14	151	9.82	52.98	0.71
11677	0.57	7	0.12	4	0.67	3	0.73	5	0.52	6	0.71	7	10	0.653333	0.453333	-0.2	0.282932	0.723448	1	13943969	13944165	AluSc	-	S	c	0	0	5	0.25	0.4	1	0.04	0.45	1532	102	0	0	197	10	110	10.15	55.84	0.66
11690	1	3	1	4	0.64	3	0.89	3	0.88	4	0.83	3	9	0.866667	0.88	0.0133333	0.304478	0.723448	1	13955647	13955926	AluSx1	+	S	x1	25	0.88	6	0.24	0.46	4	0.17	0.43	2077	89	96	0	280	9	159	6.43	56.79	0.41
11705	1	3	1	3	0.89	3	0.78	6	0.94	3	1	5	15	0.906667	0.963333	0.0566667	0.469142	0.79016	1	13972618	13972916	AluSc	+	S	c	21	0.95	3	0.15	0.4	9	0.37	0.44	2558	53	3	0	299	15	168	10.03	56.19	0.64
11730	0.83	6	0.67	3	0.64	4	0.82	7	0.68	6	0.92	4	11	0.806667	0.713333	-0.0933333	0.350661	0.724797	1	13997609	13997903	AluSx	+	S	x	16	1	12	0.36	0.51	4	0.18	0.42	2397	81	3	0	295	11	158	7.46	53.56	0.53
11747	0.65	6	0.87	5	0.62	4	1	4	0.91	4	1	4	7	0.97	0.713333	-0.256667	0.0166175	0.335302	1	14010587	14010839	AluSq2	+	S	q2	26	0.85	3	0.31	0.28	7	0.37	0.39	1387	127	221	0	253	7	122	5.53	48.22	0.48
11751	0.57	5	0.3	5	0.93	5	0.9	5	0.75	5	0.93	5	5	0.86	0.6	-0.26	0.252255	0.697345	1	14015828	14016118	AluJb	+	J	b	8	1	0	0	0.32	4	0.22	0.39	2081	151	3	7	291	5	150	3.44	51.55	0.26
11753	1	6	0.81	6	0.91	4	0.92	5	1	5	0.93	5	9	0.95	0.906667	-0.0433333	0.704853	0.920078	1	14017449	14017747	AluSg4	-	S	g4	0	0	11	0.35	0.5	1	0.06	0.38	2475	97	0	3	299	9	151	6.02	50.5	0.48
11761	1	4	1	3	1	4	1	4	0.96	4	1	5	16	0.986667	1	0.0133333	0.407681	0.750069	1	14025135	14025436	AluY	-	Y	None	0	0	6	0.3	0.4	22	0.72	0.5	2729	43	7	0	302	16	171	10.6	56.62	0.67
11762	0.97	11	0.95	7	0.88	4	0.97	10	0.6	5	1	8	17	0.856667	0.933333	0.0766667	0.986346	1	1	14025488	14025783	AluY	-	Y	None	0	0	20	0.71	0.48	17	0.57	0.5	2553	74	0	0	296	17	172	11.49	58.11	0.68
11785	0.83	6	1	6	0.9	5	0.96	6	1	6	0.86	7	8	0.94	0.91	-0.03	0.727311	0.930552	1	14068697	14068994	AluJb	-	J	b	0	0	6	0.4	0.36	1	0.06	0.37	1918	185	7	3	298	8	163	5.37	54.7	0.36
11796	1	4	0.75	4	1	3	1	3	0.94	4	0.92	4	10	0.953333	0.916667	-0.0366667	0.894733	0.991045	1	14084658	14084960	AluSx1	+	S	x1	19	1	3	0.22	0.33	3	0.25	0.31	2532	86	0	10	303	10	158	6.6	52.15	0.5
11824	1	4	0.67	3	0.83	6	1	4	1	4	1	7	16	1	0.833333	-0.166667	0.0787286	0.500778	1	14134705	14134978	AluY	+	Y	None	20	1	4	0.15	0.46	9	0.31	0.48	2278	40	98	0	274	16	152	11.68	55.47	0.78
11937	1	4	1	5	0.81	4	1	5	0.88	3	1	6	13	0.96	0.936667	-0.0233333	0.887028	0.98889	1	14304341	14304646	AluY	+	Y	None	24	0.96	2	0.12	0.38	3	0.26	0.31	2394	88	0	3	306	13	166	8.5	54.25	0.58
11986	1	3	0.82	3	0.12	4	0.8	5	0.58	6	0.62	4	9	0.666667	0.646667	-0.02	0.719244	0.927543	1	14395290	14395591	AluSg	-	S	g	0	0	2	0.09	0.42	6	0.26	0.43	2301	99	3	3	302	9	159	5.96	52.65	0.43
11995	1	4	0.8	5	0.62	3	0.72	4	1	3	1	4	9	0.906667	0.806667	-0.1	0.458539	0.782127	1	14405183	14405480	AluSx	-	S	x	0	0	5	0.2	0.44	7	0.3	0.43	2273	97	7	3	298	9	158	6.04	53.02	0.43
12041	1	4	0.5	4	0.89	3	1	3	0.75	4	0.67	3	10	0.806667	0.796667	-0.01	0.954713	1	1	14491023	14491333	AluSp	-	S	p	0	0	1	0.05	0.42	6	0.27	0.42	2404	100	6	0	311	10	162	6.43	52.09	0.48
12049	0.8	3	0.97	6	0.86	7	0.8	5	0.86	7	0.73	4	16	0.796667	0.876667	0.08	0.269694	0.716623	1	14501595	14501897	AluY	-	Y	None	0	0	4	0.2	0.4	7	0.39	0.41	2523	76	0	0	303	16	170	10.56	56.11	0.68
12101	1	3	1	5	1	3	1	5	0.97	5	1	4	11	0.99	1	0.01	0.455388	0.780407	1	14606576	14606893	AluSc8	+	S	c8	28	1	7	0.26	0.47	6	0.23	0.45	2494	72	0	28	318	11	166	6.92	52.2	0.51
12140	0.8	5	0.93	5	1	4	1	6	0.79	6	1	5	15	0.93	0.91	-0.02	0.631331	0.88582	1	14676350	14676647	AluY	+	Y	None	19	1	1	0.05	0.42	2	0.07	0.47	2295	84	10	3	298	15	166	10.07	55.7	0.65
12168	0.94	6	0.81	7	0.9	8	0.93	5	1	8	0.92	7	8	0.95	0.883333	-0.0666667	0.210177	0.647062	1	14736602	14736897	AluSz6	-	S	z6	0	0	2	0.14	0.34	4	0.16	0.46	1876	172	7	0	296	8	146	5.41	49.32	0.45
12169	1	7	0.93	7	0.88	4	0.7	5	0.78	6	1	5	8	0.826667	0.936667	0.11	0.542635	0.839197	1	14737800	14738091	AluSz	-	S	z	0	0	8	0.36	0.42	3	0.21	0.34	2093	116	0	17	292	8	153	5.48	52.4	0.41
12218	0.83	8	0.94	6	0.93	5	1	7	1	5	0.86	7	10	0.953333	0.9	-0.0533333	0.193722	0.627391	1	14799843	14800164	AluSx4	+	S	x4	31	0.9	3	0.2	0.34	3	0.13	0.44	2257	90	9	40	322	10	163	6.21	50.62	0.49
12251	0.93	5	0.8	5	0.67	3	0.83	6	0.83	3	0.89	3	8	0.85	0.8	-0.05	0.757656	0.943851	1	14855007	14855267	AluJo	+	J	o	23	1	6	0.27	0.43	15	0.47	0.51	1758	115	134	0	261	8	142	6.13	54.41	0.42
12265	0.75	4	0.67	3	0.5	5	0.5	4	0.81	3	0.83	6	11	0.713333	0.64	-0.0733333	0.532823	0.832946	1	14874100	14874357	AluY	-	Y	None	0	0	3	0.21	0.34	8	0.34	0.43	2018	78	0	27	258	11	144	8.53	55.81	0.56
12271	1	4	0.75	8	0.75	4	1	3	1	4	1	5	11	1	0.833333	-0.166667	0.0737519	0.500778	1	14882600	14882903	AluY	-	Y	None	0	0	4	0.17	0.43	3	0.14	0.41	2291	102	3	0	304	11	164	7.24	53.95	0.51
12308	0.88	4	1	4	1	3	0.75	4	1	4	1	7	10	0.916667	0.96	0.0433333	0.825884	0.968528	1	14921892	14922206	AluSz	+	S	z	30	0.93	8	0.27	0.49	7	0.36	0.39	2334	92	3	13	315	10	165	6.35	52.38	0.47
12358	1	3	0.6	5	1	4	0.67	5	1	4	0.77	8	12	0.813333	0.866667	0.0533333	0.552877	0.845558	1	14980500	14980804	AluSq2	+	S	q2	21	1	5	0.22	0.43	4	0.12	0.52	2242	121	0	3	305	12	163	7.87	53.44	0.55
12373	0.67	3	1	3	0.89	3	1	3	1	3	1	3	5	1	0.853333	-0.146667	0.0893783	0.500778	1	14990647	14990932	AluSx1	+	S	x1	4	1	4	0.24	0.37	9	0.32	0.47	2170	119	0	0	286	5	159	3.5	55.59	0.23
12387	0.8	10	0.88	8	0.71	7	0.88	10	0.89	9	0.75	6	18	0.84	0.796667	-0.0433333	0.577116	0.858029	1	15008161	15008481	AluY	-	Y	None	0	0	3	0.18	0.36	5	0.22	0.44	2514	34	16	47	321	18	175	11.21	54.52	0.77
12394	0.9	7	0.71	7	0.51	6	0.67	5	0.94	6	0.9	4	11	0.836667	0.706667	-0.13	0.34956	0.723747	1	15017980	15018287	AluSz6	-	S	z6	0	0	3	0.22	0.33	3	0.19	0.37	2167	123	0	16	308	11	160	7.14	51.95	0.54
12403	1	3	0.96	4	1	4	1	4	0.92	4	1	4	4	0.973333	0.986667	0.0133333	0.773312	0.948588	1	15030122	15030405	AluJr	+	J	r	24	0.83	1	0.04	0.45	2	0.07	0.46	1573	180	3	28	284	4	146	2.82	51.41	0.22
12408	0.67	7	0.74	9	0.82	9	0.94	6	0.81	7	0.61	3	9	0.786667	0.743333	-0.0433333	0.534659	0.834251	1	15040155	15040479	AluJo	+	J	o	28	0.79	6	0.2	0.5	2	0.07	0.47	1667	200	3	52	325	9	154	5.54	47.38	0.5
12414	0.5	4	1	3	0.75	4	0.75	4	0.86	4	0.8	5	6	0.803333	0.75	-0.0533333	0.723754	0.930029	1	15047219	15047361	AluSx3	-	S	x3	0	0	8	0.33	0.45	4	0.12	0.51	1072	112	0	0	143	6	80	8.39	55.94	0.54
12429	0.83	6	0.9	4	0.58	7	1	5	0.97	4	1	5	9	0.99	0.77	-0.22	0.00635246	0.24363	1	15060793	15061106	AluSp	-	S	p	0	0	12	0.31	0.56	12	0.39	0.49	2282	92	19	29	314	9	150	5.73	47.77	0.51
12464	0.9	7	0.71	10	1	9	0.93	12	0.94	9	0.9	10	15	0.923333	0.87	-0.0533333	0.961264	1	1	15095854	15096149	AluSq2	-	S	q2	0	0	6	0.24	0.45	6	0.21	0.49	2290	101	3	0	296	15	162	10.14	54.73	0.69
12474	0.88	4	1	4	0.69	4	0.96	4	0.96	5	1	5	5	0.973333	0.856667	-0.116667	0.324061	0.723448	1	15103143	15103451	AluJo	+	J	o	22	1	11	0.35	0.51	19	0.61	0.5	1644	184	19	36	309	5	151	3.24	48.87	0.27
12492	0.75	4	0.67	3	0.6	5	0.8	5	0.75	4	0.93	5	7	0.826667	0.673333	-0.153333	0.135214	0.54679	1	15117217	15117486	AluSz	-	S	z	0	0	7	0.34	0.41	9	0.27	0.54	1746	167	11	0	270	7	140	5.19	51.85	0.39
12504	1	5	0.79	8	0.75	4	1	6	1	3	0.88	8	13	0.96	0.846667	-0.113333	0.319456	0.723448	1	15128169	15128479	AluY	-	Y	None	0	0	21	0.5	0.58	9	0.3	0.49	2373	93	3	3	311	13	161	8.36	51.77	0.63
12512	1	3	1	5	0.75	4	0.92	6	0.89	3	0.67	6	8	0.826667	0.916667	0.09	0.198137	0.63213	1	15134783	15135093	AluSz	-	S	z	0	0	1	0.03	0.49	1	0.05	0.39	2285	116	0	6	311	8	156	5.14	50.16	0.42
12561	0.44	3	0.71	5	0.53	3	0.97	6	0.92	6	0.79	5	6	0.893333	0.56	-0.333333	0.0236387	0.379234	1	15183739	15184050	AluJb	+	J	b	22	0.77	10	0.4	0.45	6	0.28	0.43	1846	138	29	55	312	6	161	3.85	51.6	0.29
12566	0.75	4	0.45	4	0.69	4	1	3	0.69	5	0.6	4	5	0.763333	0.63	-0.133333	0.316677	0.723448	1	15187593	15187886	AluSx	+	S	x	12	0.92	6	0.33	0.38	6	0.21	0.48	2131	139	0	3	294	5	155	3.4	52.72	0.25
12568	0.78	6	0.86	7	0.62	8	1	4	1	5	1	8	13	1	0.753333	-0.246667	0.000551591	0.115334	1	15190779	15191077	AluSx1	+	S	x1	19	0.84	3	0.11	0.48	7	0.23	0.49	2326	84	10	0	299	13	165	8.7	55.18	0.58
12628	1	5	0.93	6	0.96	6	0.9	10	0.94	6	0.79	6	11	0.876667	0.963333	0.0866667	0.107701	0.508945	1	15236260	15236546	AluSx	+	S	x	0	0	5	0.16	0.53	4	0.13	0.5	1704	143	21	38	287	11	157	7.67	54.7	0.52
12646	0.59	8	1	3	0.75	8	0.96	4	1	3	0.75	4	13	0.903333	0.78	-0.123333	0.546046	0.840545	1	15245673	15245968	AluSx	-	S	x	0	0	4	0.2	0.41	7	0.37	0.39	2318	84	7	0	296	13	168	8.78	56.76	0.55
12669	0.88	4	0.75	4	0.83	6	0.8	5	1	5	1	7	12	0.933333	0.82	-0.113333	0.102266	0.50456	1	15267396	15267711	AluSx	-	S	x	0	0	6	0.16	0.55	6	0.19	0.5	2307	89	3	25	316	12	164	7.59	51.9	0.57
12697	0.9	8	0.89	9	0.96	10	0.84	11	0.98	10	0.9	9	14	0.906667	0.916667	0.01	0.902561	0.99314	1	15297612	15297918	AluSg	+	S	g	27	0.85	9	0.33	0.47	12	0.42	0.48	2227	121	7	7	307	14	160	9.12	52.12	0.69
12713	1	3	0.86	4	0.56	4	1	4	0.83	3	1	3	5	0.943333	0.806667	-0.136667	0.37716	0.735821	1	15308914	15309220	AluSx3	-	S	x3	0	0	14	0.35	0.57	12	0.31	0.56	2252	117	13	0	307	5	153	3.26	49.84	0.27
12725	1	5	0.72	9	0.83	8	0.75	4	0.75	6	1	7	15	0.833333	0.85	0.0166667	0.940914	1	1	15317567	15317871	AluSx1	+	S	x1	24	0.79	4	0.13	0.5	5	0.13	0.56	2255	88	10	7	305	15	167	9.84	54.75	0.67
12740	0.67	4	0.49	6	0.9	9	0.62	3	0.91	6	0.94	3	10	0.823333	0.686667	-0.136667	0.354269	0.724797	1	15327678	15327977	AluSz6	+	S	z6	16	1	9	0.29	0.5	11	0.32	0.53	1996	113	30	43	300	10	145	6.67	48.33	0.57
12750	0.5	3	0.64	7	0.94	7	0.86	6	0.82	5	1	6	9	0.893333	0.693333	-0.2	0.237703	0.679707	1	15332000	15332300	AluSz	+	S	z	13	1	7	0.24	0.49	5	0.15	0.52	1939	156	3	20	301	9	156	5.98	51.83	0.45
12764	0.9	5	0.55	5	0.83	3	1	6	0.93	5	0.92	6	10	0.95	0.76	-0.19	0.0739142	0.500778	1	15343512	15343804	AluSx	+	S	x	11	0.91	10	0.33	0.5	12	0.39	0.49	2210	116	0	0	293	10	154	6.83	52.56	0.5
12778	0.78	8	0.55	5	0.58	4	0.92	6	0.88	9	0.88	6	18	0.893333	0.636667	-0.256667	0.0178983	0.344282	1	15353567	15353875	AluY	-	Y	None	0	0	8	0.37	0.42	11	0.31	0.53	2613	42	3	0	309	18	170	11.65	55.02	0.78
12796	0.81	6	0.83	6	0.85	5	0.92	6	0.96	5	0.62	4	7	0.833333	0.83	-0.00333333	0.584709	0.86238	1	15367435	15367756	AluSz	-	S	z	0	0	6	0.2	0.5	11	0.32	0.54	2286	106	0	34	322	7	156	4.35	48.45	0.37
12808	1	5	0.84	6	0.88	5	0.9	7	1	6	1	5	10	0.966667	0.906667	-0.06	0.382725	0.735855	1	15373985	15374279	AluSz	+	S	z	13	0.92	10	0.24	0.58	8	0.18	0.59	2038	149	0	0	295	10	158	6.78	53.56	0.47
12831	1	4	0.6	5	1	4	1	3	1	4	0.95	5	6	0.983333	0.866667	-0.116667	0.550553	0.843735	1	15397182	15397335	AluJb	+	J	b	0	0	12	0.29	0.59	8	0.39	0.41	1145	110	0	0	154	6	90	7.79	58.44	0.46
12853	0.8	5	1	7	0.85	5	0.83	6	0.84	9	0.64	5	13	0.77	0.883333	0.113333	0.238563	0.680415	1	15417832	15418139	AluSc8	-	S	c8	0	0	3	0.15	0.4	4	0.3	0.33	2239	101	19	19	308	13	159	8.44	51.62	0.63
12859	0.75	4	0.88	5	0.73	4	1	4	0.96	4	0.61	3	9	0.856667	0.786667	-0.07	0.272799	0.71998	1	15424033	15424323	AluSq2	+	S	q2	9	0.89	3	0.13	0.44	10	0.45	0.43	2160	120	3	0	291	9	150	6.19	51.55	0.47
12873	1	6	1	3	0.95	3	0.89	7	0.97	6	0.92	6	8	0.926667	0.983333	0.0566667	0.094681	0.500778	1	15435599	15435879	AluJb	+	J	b	15	0.73	7	0.23	0.49	5	0.36	0.39	1829	149	57	0	281	8	157	5.69	55.87	0.37
12942	0.82	5	0.53	4	0.76	6	0.33	3	0.43	5	0.83	6	7	0.53	0.703333	0.173333	0.387689	0.73976	1	15505998	15506296	AluJr	+	J	r	19	0.74	3	0.1	0.48	6	0.24	0.45	2019	141	10	3	299	7	158	4.68	52.84	0.34
12954	0.92	4	0.85	6	1	3	0.81	3	0.85	5	0.6	5	7	0.753333	0.923333	0.17	0.102801	0.505792	1	15515547	15515851	AluSx1	-	S	x1	0	0	2	0.07	0.49	2	0.06	0.52	1999	118	3	52	305	7	157	4.59	51.48	0.36
12998	1	5	0.93	5	1	6	0.95	5	1	4	0.87	5	8	0.94	0.976667	0.0366667	0.44505	0.778013	1	15564465	15564765	AluSg	+	S	g	23	0.91	9	0.33	0.47	1	0.03	0.5	2274	116	7	0	301	8	156	5.32	51.83	0.4
13032	1	4	1	4	0.43	5	0.73	4	0.6	3	1	3	6	0.776667	0.81	0.0333333	0.615046	0.877904	1	15597256	15597368	AluSx	+	S	x	0	0	3	0.19	0.37	17	0.46	0.54	1810	106	70	0	113	6	69	10.62	61.06	0.58
13038	1	5	1	8	0.89	9	0.96	7	0.75	8	0.78	6	16	0.83	0.963333	0.133333	0.102739	0.505694	1	15601465	15601757	AluY	-	Y	None	0	0	6	0.22	0.47	8	0.27	0.49	2572	48	0	0	293	16	169	10.92	57.68	0.66
13073	1	8	0.93	7	1	6	0.72	8	0.56	6	1	8	13	0.76	0.976667	0.216667	0.189996	0.623766	1	15628940	15629226	AluY	+	Y	None	13	1	9	0.33	0.47	8	0.28	0.47	2365	66	24	0	287	13	160	9.06	55.75	0.59
13099	0.96	6	0.92	6	1	7	0.83	3	0.96	6	1	6	9	0.93	0.96	0.03	0.781772	0.952513	1	15660321	15660621	AluJb	-	J	b	0	0	7	0.28	0.45	8	0.26	0.5	1968	153	23	0	301	9	145	5.98	48.17	0.53
13126	1	6	1	10	0.71	11	0.87	9	1	7	1	7	15	0.956667	0.903333	-0.0533333	0.813148	0.963977	1	15683840	15684143	AluSc	+	S	c	22	1	6	0.26	0.43	6	0.27	0.44	2169	86	3	13	304	15	161	9.87	52.96	0.71
13130	1	5	0.78	9	1	6	1	6	1	4	1	3	19	1	0.926667	-0.0733333	0.317895	0.723448	1	15688222	15688516	AluSc	+	S	c	18	0.94	2	0.06	0.51	11	0.31	0.55	2303	58	7	0	295	19	166	12.88	56.27	0.81
13138	1	6	0.96	6	0.97	7	0.92	6	1	7	0.97	6	7	0.963333	0.976667	0.0133333	0.749804	0.939859	1	15693725	15693927	AluSx	+	S	x	0	0	3	0.11	0.47	9	0.23	0.56	1489	103	0	0	203	7	110	6.9	54.19	0.47
13139	1	4	0.88	4	0.6	5	1	3	0.78	3	0.92	4	8	0.9	0.826667	-0.0733333	0.763734	0.946642	1	15694452	15694769	AluSz	-	S	z	0	0	8	0.22	0.55	5	0.19	0.46	2100	110	0	19	318	8	168	5.03	52.83	0.36
13146	0.9	5	0.88	8	0.92	7	1	7	0.9	7	1	5	8	0.966667	0.9	-0.0666667	0.0906157	0.500778	1	15700067	15700335	AluJo	+	J	o	0	0	15	0.5	0.49	8	0.37	0.42	1513	167	37	11	269	8	143	5.95	53.16	0.43
13152	1	4	0.95	4	0.81	4	1	4	0.9	5	1	3	5	0.966667	0.92	-0.0466667	0.494078	0.807784	1	15703250	15703520	AluJr4	+	J	r4	0	0	12	0.47	0.45	9	0.25	0.53	1493	184	0	19	271	5	145	3.69	53.51	0.26
13166	0.88	4	0.98	5	0.93	4	1	4	1	4	0.97	4	5	0.99	0.93	-0.06	0.0862094	0.500778	1	15715678	15715964	AluJo	+	J	o	21	1	10	0.31	0.51	4	0.19	0.41	1602	174	3	11	287	5	143	3.48	49.83	0.28
13210	0.2	5	0.21	5	0.53	4	0.5	3	0.2	5	0.25	4	7	0.316667	0.313333	-0.00333333	0.958532	1	1	15750404	15750699	AluJo	+	J	o	26	0.92	8	0.25	0.51	11	0.25	0.6	1993	132	47	7	296	7	154	4.73	52.03	0.35
13230	0.97	5	0.73	6	0.95	7	0.88	4	1	6	0.97	7	7	0.95	0.883333	-0.0666667	0.40333	0.750069	1	15763897	15764061	AluJo	-	J	o	0	0	5	0.14	0.53	11	0.42	0.46	1096	146	0	12	165	7	89	8.48	53.94	0.59
13266	0.88	4	0.76	12	0.67	9	1	7	0.65	7	0.63	9	15	0.76	0.77	0.01	0.630887	0.88573	1	15781349	15781657	AluSx4	+	S	x4	30	1	3	0.12	0.44	11	0.36	0.5	2291	87	7	0	309	15	158	9.71	51.13	0.75
13273	0.89	3	0.88	4	0.83	6	0.75	4	1	5	0.96	4	7	0.903333	0.866667	-0.0366667	0.304961	0.723448	1	15785658	15785945	AluJo	-	J	o	0	0	6	0.21	0.48	3	0.11	0.47	1781	128	3	17	288	7	151	4.86	52.43	0.36
13277	0.96	3	1	3	1	3	1	3	1	3	1	3	3	1	0.986667	-0.0133333	0.407681	0.750069	1	15787204	15787330	FLAM_A	-	FLAM_A	None	0	0	7	0.35	0.4	8	0.3	0.46	678	205	0	8	127	3	68	4.72	53.54	0.34
13283	0.9	5	0.73	5	1	4	0.94	6	0.96	4	0.95	4	8	0.95	0.876667	-0.0733333	0.723868	0.930036	1	15790263	15790556	AluSz	+	S	z	10	0.9	12	0.29	0.57	3	0.11	0.46	1778	126	24	31	294	8	153	5.44	52.04	0.4
13286	0.87	5	1	5	1	5	1	4	0.96	6	0.9	5	9	0.953333	0.956667	0.00333333	0.730715	0.931648	1	15791499	15791803	AluSz	-	S	z	0	0	7	0.3	0.43	2	0.08	0.46	2169	102	10	0	305	9	155	5.9	50.82	0.46
13290	1	3	1	3	0.61	3	0.71	4	0.97	3	0.97	4	5	0.883333	0.87	-0.0133333	0.693772	0.915811	1	15795020	15795296	AluJr	+	J	r	8	0.88	0	0	0.39	13	0.39	0.52	1450	177	61	11	277	5	144	3.61	51.99	0.27
13301	1	4	0.91	4	1	4	1	3	0.92	4	0.96	4	4	0.96	0.97	0.01	0.656089	0.8988	1	15800944	15801103	AluSx3	-	S	x3	0	0	13	0.39	0.51	12	0.39	0.5	624	188	12	69	160	4	87	5	54.37	0.35
13317	0.98	10	0.78	6	0.7	5	0.93	7	0.86	7	0.88	8	13	0.89	0.82	-0.07	0.891186	0.989346	1	15810141	15810436	AluSx3	+	S	x3	12	1	10	0.25	0.56	3	0.11	0.47	1979	125	0	7	296	13	159	8.78	53.72	0.62
13342	0.83	4	0.93	5	0.93	4	0.88	4	1	4	1	3	5	0.96	0.896667	-0.0633333	0.144346	0.558844	1	15828254	15828536	AluJb	-	J	b	0	0	10	0.56	0.38	3	0.1	0.5	1483	148	85	25	283	5	134	3.53	47.35	0.32
13379	1	4	0.96	4	1	4	1	6	1	4	0.94	4	9	0.98	0.986667	0.00666667	0.855585	0.978102	1	15854647	15854947	AluSx	+	S	x	20	0.95	7	0.43	0.36	4	0.33	0.31	2322	90	7	3	301	9	159	5.98	52.82	0.43
13386	1	4	1	3	1	3	1	4	0.95	4	1	4	11	0.983333	1	0.0166667	0.382679	0.735821	1	15860937	15861227	AluSx3	+	S	x3	23	0.87	4	0.2	0.4	3	0.2	0.35	2082	93	52	7	291	11	150	7.56	51.55	0.59
13422	1	7	1	8	0.75	4	0.67	3	0.98	6	0.75	4	13	0.8	0.916667	0.116667	0.307992	0.723448	1	15882716	15883018	AluSx	-	S	x	0	0	10	0.38	0.46	1	0.08	0.32	1945	93	52	11	303	13	164	8.58	54.13	0.59
13440	0.78	3	1	4	1	3	1	3	0.91	4	0.5	3	4	0.803333	0.926667	0.123333	0.469396	0.790361	1	15898725	15898844	AluSx	-	S	x	0	0	8	0.35	0.43	10	0.36	0.48	923	50	100	0	120	4	68	6.67	56.67	0.42
13446	1	4	1	5	1	4	1	4	0.96	5	1	3	5	0.986667	1	0.0133333	0.407681	0.750069	1	15902225	15902550	AluJb	-	J	b	0	0	1	0.04	0.45	10	0.33	0.49	1688	156	25	21	326	5	153	3.07	46.93	0.28
13449	0.67	9	0.97	4	1	3	1	3	0.67	3	0.86	3	14	0.843333	0.88	0.0366667	0.715517	0.925831	1	15903233	15903544	AluYk4	-	Y	k4	0	0	15	0.41	0.54	11	0.38	0.48	2638	67	0	3	312	14	159	8.97	50.96	0.71
13457	0.93	7	1	5	1	5	0.96	7	1	7	0.81	8	8	0.923333	0.976667	0.0533333	0.441302	0.775017	1	15907576	15907868	AluJo	+	J	o	25	0.76	13	0.43	0.49	12	0.49	0.44	1670	198	51	3	293	8	155	5.46	52.9	0.39
13460	0.75	4	0.73	3	0.83	6	0.67	3	0.96	3	0.67	3	13	0.766667	0.77	0.00333333	0.716496	0.92619	1	15908482	15908783	AluSq2	+	S	q2	22	0.95	12	0.48	0.45	6	0.21	0.48	2501	80	10	0	302	13	153	8.61	50.66	0.67
13500	0.43	7	0.44	5	0.68	5	0.71	7	0.38	8	0.51	5	11	0.533333	0.516667	-0.0166667	0.903292	0.993478	1	15930521	15930751	AluSz	+	S	z	0	0	31	0.83	0.55	24	0.62	0.56	1652	100	69	9	231	11	128	9.52	55.41	0.63
13514	0.38	5	0.36	5	0.8	5	0.93	5	0.7	5	0.88	4	5	0.836667	0.513333	-0.323333	0.076167	0.500778	1	15936915	15937182	AluJo	+	J	o	9	1	5	0.29	0.37	11	0.34	0.51	1478	183	82	4	268	5	127	3.73	47.39	0.35
13530	0.75	4	0.82	6	0.71	7	1	7	0.56	9	1	3	17	0.853333	0.76	-0.0933333	0.184452	0.61624	1	15945606	15945918	AluSz	-	S	z	0	0	4	0.25	0.36	21	0.72	0.48	2394	86	0	16	313	17	163	10.86	52.08	0.81
13531	0.7	7	0.38	3	0.6	6	0.78	9	0.95	5	0.5	6	19	0.743333	0.56	-0.183333	0.240809	0.683161	1	15945951	15946243	AluY	-	Y	None	0	0	17	0.66	0.45	4	0.22	0.38	2356	65	55	0	293	19	165	12.97	56.31	0.83
13533	0.61	4	0.7	4	0.58	4	0.69	4	0.58	4	0.81	3	4	0.693333	0.63	-0.0633333	0.515711	0.822475	1	15948569	15948818	AluJr	-	J	r	0	0	6	0.33	0.39	2	0.13	0.35	1047	192	208	0	250	4	121	3.2	48.4	0.27
13536	1	5	0.5	4	0.94	6	0.4	5	1	3	0.77	8	13	0.723333	0.813333	0.09	0.722758	0.929547	1	15950274	15950569	AluY	+	Y	None	22	0.77	3	0.15	0.4	3	0.14	0.42	2072	80	40	14	296	13	157	8.78	53.04	0.63
13540	0.67	3	0.68	7	0.62	4	0.54	4	0.62	5	0.52	5	11	0.56	0.656667	0.0966667	0.305473	0.723448	1	15952139	15952411	AluSg	-	S	g	0	0	2	0.1	0.39	2	0.14	0.34	2053	106	22	0	273	11	155	8.06	56.78	0.5
13553	0.98	9	0.91	9	0.95	7	0.88	8	0.81	9	0.97	8	9	0.886667	0.946667	0.06	0.353385	0.724797	1	15962632	15962914	AluJb	-	J	b	0	0	2	0.11	0.39	5	0.18	0.47	1525	170	64	14	283	9	145	6.36	51.24	0.49
13564	1	3	0.93	3	1	3	1	3	1	3	1	3	3	1	0.976667	-0.0233333	0.35706	0.724797	1	15968995	15969107	AluJo	-	J	o	0	0	3	0.18	0.38	14	0.43	0.51	692	186	26	0	113	3	62	5.31	54.87	0.36
13567	1	4	0.88	4	0.95	4	1	4	1	4	1	4	4	1	0.943333	-0.0566667	0.106517	0.508066	1	15969577	15969661	AluSx	+	S	x	0	0	14	0.42	0.52	7	0.33	0.42	1416	126	0	69	85	4	48	9.41	56.47	0.61
13569	0.93	10	0.97	9	0.85	8	0.89	7	1	8	0.98	8	12	0.956667	0.916667	-0.04	0.31712	0.723448	1	15971390	15971686	AluSz	-	S	z	0	0	20	0.68	0.49	3	0.13	0.43	1994	108	17	20	297	12	161	8.08	54.21	0.56
13573	0.89	3	1	3	1	3	1	4	1	5	1	4	6	1	0.963333	-0.0366667	0.335911	0.723448	1	15974179	15974467	AluSx3	+	S	x3	8	1	9	0.35	0.46	1	0.06	0.35	1769	170	0	14	289	6	146	4.15	50.52	0.33
13587	0.95	5	1	5	1	5	0.9	5	1	4	1	5	5	0.966667	0.983333	0.0166667	0.791666	0.956775	1	15980870	15981168	AluJb	+	J	b	16	1	2	0.13	0.35	1	0.08	0.31	1799	171	7	20	299	5	149	3.34	49.83	0.27
13593	1	4	1	9	1	6	0.93	7	1	5	1	6	12	0.976667	1	0.0233333	0.35706	0.724797	1	15984976	15985264	AluSp	+	S	p	15	1	4	0.18	0.42	2	0.14	0.34	2092	104	31	0	289	12	151	8.3	52.25	0.62
13598	1	6	1	7	1	6	0.81	4	0.96	5	1	5	7	0.923333	1	0.0766667	0.12868	0.53611	1	15995763	15996025	AluSx3	+	S	x3	2	1	4	0.23	0.38	1	0.04	0.45	1637	148	80	4	263	7	149	5.32	56.65	0.33
13616	1	4	1	5	0.69	4	1	3	0.85	4	0.92	3	7	0.923333	0.896667	-0.0266667	0.775434	0.949632	1	16005405	16005712	AluSz	-	S	z	0	0	5	0.16	0.5	2	0.1	0.4	2268	104	13	0	308	7	155	4.55	50.32	0.36
13622	1	5	1	4	1	4	1	4	0.83	3	0.56	3	5	0.796667	1	0.203333	0.0822985	0.500778	1	16008418	16008700	AluJo	+	J	o	9	0.89	3	0.11	0.47	15	0.47	0.51	1610	166	46	14	283	5	149	3.53	52.65	0.26
13632	1	8	1	7	1	4	0.8	5	1	9	1	4	14	0.933333	1	0.0666667	0.319756	0.723448	1	16015462	16015768	AluSp	+	S	p	28	0.89	7	0.27	0.46	8	0.29	0.47	2396	91	13	0	307	14	160	9.12	52.12	0.68
13659	1	4	0.83	3	0.92	3	0.87	3	1	4	0.96	4	6	0.943333	0.916667	-0.0266667	0.755895	0.94279	1	16029213	16029524	AluJr	-	J	r	0	0	8	0.24	0.52	13	0.34	0.56	1962	144	3	32	312	6	155	3.85	49.68	0.32
13660	0.79	6	0.62	4	1	5	0.9	5	0.9	5	0.96	5	8	0.92	0.803333	-0.116667	0.750806	0.940361	1	16031664	16031976	AluSx3	-	S	x3	0	0	16	0.36	0.6	10	0.29	0.55	2080	147	6	16	313	8	152	5.11	48.56	0.44
13661	1	3	1	5	0.98	6	0.88	4	1	5	1	6	8	0.96	0.993333	0.0333333	0.482844	0.800362	1	16032305	16032591	AluJb	+	J	b	16	0.75	13	0.39	0.54	12	0.39	0.51	1889	139	38	0	287	8	159	5.57	55.4	0.37
13670	1	3	0.95	5	0.96	3	1	3	1	5	1	3	17	1	0.97	-0.03	0.120423	0.523583	1	16036440	16036740	AluY	+	Y	None	18	1	5	0.24	0.41	8	0.31	0.45	2470	57	3	10	301	17	167	11.3	55.48	0.74
13673	0.79	3	1	3	0.83	3	1	4	0.88	4	1	4	5	0.96	0.873333	-0.0866667	0.355912	0.724797	1	16037388	16037714	AluJr4	+	J	r4	23	0.78	7	0.26	0.47	6	0.25	0.44	1074	153	95	159	327	5	164	3.06	50.15	0.24
13688	1	6	0.92	6	1	7	1	3	1	7	0.92	6	9	0.973333	0.973333	0	1	1	1	16049966	16050264	AluJo	+	J	o	25	1	9	0.25	0.54	17	0.36	0.62	2201	104	0	17	299	9	158	6.02	52.84	0.43
13697	0.5	7	0.94	8	0.83	7	0.72	7	0.57	7	0.8	5	12	0.696667	0.756667	0.06	0.507328	0.816477	1	16067192	16067477	AluSx3	-	S	x3	0	0	6	0.19	0.5	14	0.33	0.59	2179	101	21	0	286	12	162	8.39	56.64	0.53
13726	0.63	9	0.98	12	0.91	11	1	10	0.78	12	0.62	12	20	0.8	0.84	0.04	0.930041	1	1	16086437	16086737	AluSx	+	S	x	23	0.78	16	0.39	0.58	7	0.2	0.53	2378	70	13	0	301	20	169	13.29	56.15	0.85
13731	0.83	3	0.88	3	0.59	3	0.6	3	0.89	3	0.51	3	3	0.666667	0.766667	0.1	0.564066	0.852005	1	16089056	16089175	AluSx	-	S	x	0	0	11	0.37	0.5	10	0.28	0.54	1884	106	28	21	120	3	55	5	45.83	0.48
13742	1	3	1	3	0.57	4	1	3	1	3	1	3	5	1	0.856667	-0.143333	0.307831	0.723448	1	16094374	16094677	AluSx1	-	S	x1	0	0	11	0.25	0.6	8	0.18	0.59	2091	135	7	3	304	5	154	3.29	50.66	0.26
13777	0.93	3	0.72	5	1	4	0.83	3	0.81	4	1	3	9	0.88	0.883333	0.00333333	0.903968	0.993746	1	16110406	16110698	AluSz	+	S	z	25	0.76	19	0.52	0.54	14	0.34	0.58	2148	96	44	0	293	9	154	6.14	52.56	0.45
13780	0.69	5	0.9	5	0.5	4	0.8	5	0.81	5	0.79	5	7	0.8	0.696667	-0.103333	0.57231	0.856284	1	16113346	16113629	AluSz	+	S	z	25	0.6	11	0.34	0.51	10	0.26	0.55	1824	134	35	0	284	7	155	4.93	54.58	0.34
13790	1	5	0.83	6	0.88	4	0.92	4	1	4	0.92	4	7	0.946667	0.903333	-0.0433333	0.699594	0.917995	1	16117551	16117818	AluJb	+	J	b	20	1	5	0.2	0.46	22	0.6	0.55	1602	138	127	0	268	7	143	5.22	53.36	0.37
13827	0.89	3	0.87	3	1	3	0.58	3	0.56	3	0.63	3	3	0.59	0.92	0.33	0.0257153	0.387618	1	16134193	16134317	AluSx	-	S	x	0	0	15	0.58	0.46	6	0.23	0.46	893	96	80	0	125	3	65	4.8	52	0.36
13843	0.8	5	0.66	11	0.8	5	0.83	7	0.71	7	0.82	11	14	0.786667	0.753333	-0.0333333	0.685169	0.911281	1	16139778	16140068	AluSc8	+	S	c8	12	1	5	0.2	0.45	14	0.47	0.49	2137	93	7	0	291	14	157	9.62	53.95	0.67
13880	0.93	5	1	7	0.9	5	0.73	5	0.71	7	0.93	6	15	0.79	0.943333	0.153333	0.111257	0.513564	1	16152680	16152973	AluSg	-	S	g	0	0	2	0.09	0.43	9	0.28	0.51	2072	99	20	0	294	15	153	10.2	52.04	0.76
13889	0.47	4	0.51	5	0.37	5	0.25	5	0.78	4	0.58	5	5	0.536667	0.45	-0.0866667	0.617519	0.878954	1	16156139	16156431	AluJr4	-	J	r4	0	0	11	0.36	0.51	6	0.29	0.42	1669	171	14	0	293	5	151	3.41	51.54	0.26
13890	0.71	4	0.86	4	0.7	4	0.79	4	0.85	4	0.79	4	4	0.81	0.756667	-0.0533333	0.562638	0.851532	1	16156611	16156770	FRAM	+	FRAM	None	18	0.78	8	0.29	0.48	1	0.06	0.37	705	250	12	0	160	4	75	5	46.88	0.46
13891	0.71	9	0.71	11	0.79	14	0.74	9	0.77	11	0.62	12	16	0.71	0.736667	0.0266667	0.770316	0.948265	1	16157248	16157542	AluSx3	-	S	x3	0	0	1	0.06	0.37	9	0.46	0.4	1949	105	34	7	295	16	162	10.85	54.92	0.72
13894	0.88	8	0.33	3	0.75	4	0.79	7	0.79	7	0.71	7	16	0.763333	0.653333	-0.11	0.634397	0.887933	1	16159115	16159388	AluY	-	Y	None	0	0	15	0.55	0.47	13	0.55	0.43	2074	44	4	25	274	16	166	11.68	60.58	0.64
13895	0.42	6	0.24	5	0.11	6	0.54	6	0.57	6	0.58	6	6	0.563333	0.256667	-0.306667	0.0441787	0.451065	1	16159676	16159800	AluJb	+	J	b	0	0	14	0.58	0.44	17	0.64	0.46	1289	165	123	33	125	6	69	9.6	55.2	0.63
13896	0.2	5	0.17	6	0.2	5	0.56	8	0.66	10	0.83	8	11	0.683333	0.19	-0.493333	0.00415583	0.213594	1	16159801	16160070	AluSz	+	S	z	28	1	14	0.57	0.45	9	0.52	0.37	1680	89	144	0	270	11	139	8.15	51.48	0.62
13897	0.42	5	0.04	5	0.03	5	0.12	4	0.54	5	0.7	4	5	0.453333	0.163333	-0.29	0.146809	0.561507	1	16160071	16160220	AluJb	+	J	b	19	1	19	0.67	0.48	7	0.51	0.33	1289	165	123	33	150	5	70	6.67	46.67	0.64
13900	0.95	7	1	6	0.94	7	1	5	0.92	6	1	6	7	0.973333	0.963333	-0.01	0.624504	0.882285	1	16164463	16164741	AluJr	-	J	r	0	0	27	0.93	0.49	17	0.63	0.47	1377	159	97	4	279	7	143	5.02	51.25	0.38
13901	0.5	3	0.89	7	0.96	14	0.97	9	1	10	0.86	7	16	0.943333	0.783333	-0.16	0.219765	0.658702	1	16164926	16165222	AluSx1	+	S	x1	17	0.88	7	0.29	0.44	5	0.28	0.39	1966	108	10	3	297	16	170	10.77	57.24	0.69
13934	0.94	3	0.88	4	0.73	3	0.93	3	0.93	5	0.83	3	7	0.896667	0.85	-0.0466667	0.605528	0.873733	1	16183061	16183362	AluSx1	-	S	x1	0	0	11	0.5	0.42	6	0.26	0.43	2300	119	0	0	302	7	148	4.64	49.01	0.39
13940	0.67	6	0.55	6	0.93	3	0.78	6	0.7	6	0.72	6	6	0.733333	0.716667	-0.0166667	0.845746	0.977125	1	16185149	16185459	AluJb	+	J	b	21	0.86	3	0.13	0.43	6	0.33	0.38	1647	186	3	29	311	6	162	3.86	52.09	0.28
13956	0.91	8	0.98	8	0.97	8	0.95	8	1	9	0.98	9	9	0.976667	0.953333	-0.0233333	0.419094	0.759133	1	16191104	16191495	AluJr	-	J	r	0	0	8	0.34	0.44	14	0.5	0.47	1159	125	5	235	392	9	199	4.59	50.77	0.36
13969	1	4	0.88	4	1	4	1	4	0.95	4	1	4	5	0.983333	0.96	-0.0233333	0.749118	0.939515	1	16197480	16197762	AluSg	-	S	g	0	0	1	0.07	0.35	3	0.16	0.39	1958	109	50	11	283	5	151	3.53	53.36	0.25
13983	1	3	0.6	4	1	4	0.67	3	1	3	0.89	3	5	0.853333	0.866667	0.0133333	0.660508	0.900904	1	16211219	16211525	AluSz6	-	S	z6	0	0	1	0.07	0.33	7	0.57	0.32	1847	150	29	16	307	5	145	3.26	47.23	0.3
13987	0.94	4	1	5	1	4	1	5	1	4	0.83	5	10	0.943333	0.98	0.0366667	0.728596	0.930552	1	16214238	16214530	AluSx1	+	S	x1	8	0.88	12	0.41	0.49	8	0.4	0.4	2065	106	3	24	293	10	159	6.83	54.27	0.47
13991	1	4	0.75	5	0.62	4	1	4	0.75	4	1	4	7	0.916667	0.79	-0.126667	0.406563	0.750069	1	16215647	16215960	AluSq2	-	S	q2	0	0	11	0.44	0.45	5	0.21	0.44	2226	134	0	6	314	7	157	4.46	50	0.36
14000	1	4	1	4	1	3	0.84	4	1	4	0.67	4	5	0.836667	1	0.163333	0.0798898	0.500778	1	16220258	16220516	AluSz6	+	S	z6	5	0.6	4	0.21	0.4	3	0.18	0.37	1802	120	12	12	259	5	133	3.86	51.35	0.29
14001	0.67	7	1	5	0.92	6	1	5	1	4	1	5	13	1	0.863333	-0.136667	0.10111	0.503913	1	16221032	16221327	AluSc	-	S	c	0	0	3	0.18	0.36	11	0.49	0.43	2261	84	20	0	296	13	155	8.78	52.36	0.65
14007	0.83	6	0.92	6	1	9	0.67	6	0.8	5	0.86	7	12	0.776667	0.916667	0.14	0.130467	0.538812	1	16223851	16224156	AluSp	-	S	p	0	0	11	0.42	0.46	5	0.23	0.42	2235	105	10	7	306	12	160	7.84	52.29	0.58
14010	1	6	0.59	7	1	7	0.71	7	0.94	6	0.83	6	9	0.826667	0.863333	0.0366667	0.327302	0.723448	1	16225657	16225973	AluJb	-	J	b	0	0	11	0.43	0.45	5	0.27	0.39	1987	148	0	28	317	9	162	5.68	51.1	0.44
14014	0.95	5	0.92	6	0.93	5	0.88	5	0.94	4	0.89	6	7	0.903333	0.933333	0.03	0.398001	0.74832	1	16227565	16227829	AluSz6	+	S	z6	17	0.94	2	0.11	0.39	8	0.36	0.43	1133	192	147	23	265	7	132	5.28	49.81	0.46
14015	0.86	6	0.82	6	0.78	5	0.73	7	0.88	7	0.84	7	8	0.816667	0.82	0.00333333	0.972403	1	1	16227856	16228164	AluSz	+	S	z	20	1	8	0.34	0.44	8	0.46	0.37	1790	159	19	42	309	8	157	5.18	50.81	0.41
14017	0.62	4	0.67	3	1	4	1	4	0.97	4	1	4	4	0.99	0.763333	-0.226667	0.117876	0.521061	1	16229025	16229155	AluJo	+	J	o	16	0.81	7	0.31	0.42	3	0.22	0.33	882	145	15	0	131	4	65	6.11	49.62	0.51
14039	1	5	0.93	5	0.9	5	0.95	5	1	5	0.92	5	5	0.956667	0.943333	-0.0133333	0.833487	0.97179	1	16242021	16242332	AluJb	-	J	b	0	0	4	0.16	0.46	5	0.41	0.31	1837	170	0	22	312	5	148	3.21	47.44	0.3
14043	1	11	0.82	9	0.96	7	0.89	9	0.89	12	0.92	9	15	0.9	0.926667	0.0266667	0.33483	0.723448	1	16244716	16245013	AluSq2	-	S	q2	0	0	1	0.06	0.36	4	0.34	0.31	2098	131	27	0	298	15	149	10.07	50	0.81
14051	1	5	1	3	0.88	4	0.98	6	1	5	0.8	5	6	0.926667	0.96	0.0333333	0.72277	0.929547	1	16252609	16252865	AluSx	+	S	x	0	0	2	0.13	0.35	9	0.46	0.4	1717	128	12	19	257	6	139	4.67	54.09	0.32
14056	1	5	1	4	0.97	5	0.97	5	1	4	1	4	5	0.99	0.99	0	1	1	1	16264609	16264910	AluSz	-	S	z	0	0	12	0.29	0.58	6	0.21	0.48	1968	122	20	40	302	5	163	3.31	53.97	0.23
14069	1	5	0.87	5	0.98	7	0.94	7	0.97	7	0.93	7	8	0.946667	0.95	0.00333333	0.54086	0.83819	1	16288419	16288732	AluJb	+	J	b	29	0.79	13	0.41	0.51	6	0.19	0.5	1799	169	0	13	314	8	161	5.1	51.27	0.41
14087	0.81	8	0.92	8	0.82	11	0.81	8	0.93	10	0.86	11	21	0.866667	0.85	-0.0166667	0.787109	0.954766	1	16301068	16301370	AluSz	-	S	z	0	0	5	0.21	0.45	7	0.26	0.47	2242	79	0	3	303	21	168	13.86	55.45	0.9
14093	0.8	5	0.56	6	0.61	5	1	6	1	6	0.88	6	10	0.96	0.656667	-0.303333	0.0152919	0.326806	1	16305114	16305423	AluSx1	+	S	x1	19	0.89	5	0.3	0.37	2	0.13	0.35	1824	103	29	58	310	10	155	6.45	50	0.52
14117	0.83	3	0.6	5	1	5	0.93	5	0.78	6	0.6	5	10	0.77	0.81	0.04	0.558666	0.84878	1	16327707	16328011	AluSq2	+	S	q2	15	0.93	7	0.38	0.38	5	0.23	0.42	2108	102	0	23	305	10	161	6.56	52.79	0.47
14133	0.8	5	1	5	1	6	1	7	1	8	1	6	8	1	0.933333	-0.0666667	0.319756	0.723448	1	16338548	16338802	AluJb	-	J	b	0	0	3	0.13	0.43	9	0.21	0.59	1586	176	4	0	255	8	135	6.27	52.94	0.46
14170	1	5	0.72	3	0.72	4	0.75	4	0.93	5	0.73	5	5	0.803333	0.813333	0.01	0.630855	0.88573	1	16373990	16374276	AluJr	+	J	r	12	0.75	7	0.2	0.52	12	0.27	0.6	1564	216	24	0	287	5	148	3.48	51.57	0.26
14192	0.88	4	0.75	4	1	3	0.88	4	1	4	1	4	6	0.96	0.876667	-0.0833333	0.378057	0.735821	1	16396266	16396552	AluJo	-	J	o	0	0	7	0.18	0.55	8	0.25	0.51	1851	150	21	11	287	6	145	4.18	50.52	0.33
14217	1	4	0.52	4	0.96	4	1	4	0.85	4	1	3	4	0.95	0.826667	-0.123333	0.507932	0.816995	1	16410824	16410975	AluJo	-	J	o	0	0	8	0.22	0.54	8	0.22	0.54	1019	132	13	0	152	4	88	5.26	57.89	0.34
14243	1	5	0.9	5	1	5	0.57	5	0.67	3	0.83	3	9	0.69	0.966667	0.276667	0.0145211	0.322677	1	16425165	16425461	AluSx	-	S	x	0	0	4	0.16	0.46	7	0.25	0.47	2241	88	0	20	297	9	159	6.06	53.54	0.43
14249	0.7	5	0.5	5	0.62	4	0.88	6	0.88	4	0.86	7	7	0.873333	0.606667	-0.266667	0.011802	0.29992	1	16428805	16429115	AluSz	-	S	z	0	0	5	0.23	0.43	8	0.34	0.44	1982	133	0	11	311	7	164	4.5	52.73	0.33
14258	0.8	5	0.83	6	0.5	4	0.83	6	0.67	6	0.58	4	11	0.693333	0.71	0.0166667	0.858021	0.979461	1	16440143	16440429	AluSz	+	S	z	14	0.93	6	0.13	0.6	14	0.41	0.53	2129	101	31	0	287	11	156	7.67	54.36	0.52
14263	0.83	8	0.96	6	1	7	0.9	5	1	4	0.96	6	12	0.953333	0.93	-0.0233333	0.847755	0.977197	1	16443682	16443977	AluSg	+	S	g	19	1	10	0.29	0.53	9	0.3	0.5	2291	84	14	3	296	12	158	8.11	53.38	0.57
14266	1	3	0.86	7	0.67	6	0.73	5	0.83	6	0.73	5	9	0.763333	0.843333	0.08	0.312201	0.723448	1	16444771	16445079	AluSq	-	S	q	0	0	10	0.31	0.51	11	0.25	0.61	2065	142	0	26	309	9	163	5.83	52.75	0.44
14287	0.75	4	0.87	5	0.96	4	0.9	5	0.88	4	0.67	3	5	0.816667	0.86	0.0433333	0.585657	0.862642	1	16462369	16462663	AluJo	-	J	o	0	0	14	0.31	0.61	9	0.29	0.5	1995	166	3	0	295	5	151	3.39	51.19	0.26
14311	0.33	6	0	3	0	5	0.12	4	0.38	4	0	4	14	0.166667	0.11	-0.0566667	0.568732	0.854799	1	16480967	16481278	AluSq2	+	S	q2	27	0.96	8	0.18	0.6	27	0.49	0.66	2416	83	0	6	312	14	166	8.97	53.21	0.65
14315	0.93	9	0.94	6	0.91	8	0.89	6	0.85	12	0.82	10	15	0.853333	0.926667	0.0733333	0.0952107	0.500778	1	16485016	16485307	AluSz	+	S	z	32	0.66	5	0.18	0.49	9	0.28	0.52	2178	99	27	0	292	15	162	10.27	55.48	0.68
14325	0.71	5	0.94	4	0.89	4	0.87	4	0.83	5	1	5	7	0.9	0.846667	-0.0533333	0.467449	0.788832	1	16490350	16490523	AluSp	+	S	p	0	0	15	0.43	0.53	8	0.36	0.43	1373	86	6	0	174	7	96	8.05	55.17	0.53
14357	0.88	4	0.97	5	0.67	4	1	4	0.83	5	0.78	5	8	0.87	0.84	-0.03	0.735018	0.934021	1	16506643	16506946	AluSz	+	S	z	20	0.95	14	0.51	0.47	11	0.4	0.47	2257	102	7	13	304	8	159	5.26	52.3	0.39
14361	0.86	7	0.92	4	0.76	6	0.88	5	1	5	0.68	6	11	0.853333	0.846667	-0.00666667	0.573734	0.856284	1	16509352	16509646	AluSx1	+	S	x1	33	0.73	8	0.24	0.52	15	0.47	0.51	2322	78	20	3	295	11	161	7.46	54.58	0.5
14401	0.51	4	0.83	4	0.93	3	0.65	4	0.92	4	0.63	4	5	0.733333	0.756667	0.0233333	0.826284	0.968701	1	16540603	16540887	AluJb	-	J	b	0	0	7	0.35	0.41	4	0.21	0.39	1791	161	0	21	285	5	156	3.51	54.74	0.24
14414	0.62	8	1	7	0.56	8	1	10	0.95	10	1	6	11	0.983333	0.726667	-0.256667	0.14693	0.561507	1	16549409	16549709	AluSc	-	S	c	0	0	7	0.24	0.48	5	0.18	0.48	1883	100	81	0	301	11	145	7.31	48.17	0.64
14455	1	4	0.96	4	0.96	3	1	4	1	3	1	6	6	1	0.973333	-0.0266667	0.128058	0.535089	1	16585230	16585534	AluJr	-	J	r	0	0	7	0.27	0.46	1	0.06	0.37	1848	177	0	10	305	6	148	3.93	48.52	0.34
14464	1	10	1	7	1	9	1	6	0.95	7	0.97	10	10	0.973333	1	0.0266667	0.140844	0.553225	1	16589196	16589494	AluJb	-	J	b	0	0	7	0.26	0.47	13	0.5	0.46	1825	144	0	43	299	10	155	6.69	51.84	0.5
14465	1	4	1	3	0.9	5	0.75	4	0.58	3	1	5	10	0.776667	0.966667	0.19	0.241192	0.683488	1	16589677	16589943	AluY	+	Y	None	11	0.73	10	0.44	0.43	19	0.65	0.49	1978	79	79	8	267	10	150	7.49	56.18	0.48
14471	0.91	6	0.77	7	0.83	6	0.9	5	0.82	7	1	6	9	0.906667	0.836667	-0.07	0.290738	0.723448	1	16595177	16595406	AluSp	+	S	p	0	0	0	0	0.39	13	0.42	0.5	1514	91	0	91	230	9	121	7.83	52.61	0.57
14481	1	5	1	3	0.9	3	1	3	1	3	1	4	14	1	0.966667	-0.0333333	0.339508	0.723448	1	16598764	16599051	AluSp	-	S	p	0	0	9	0.31	0.48	4	0.2	0.4	2403	73	3	0	288	14	158	9.72	54.86	0.65
14486	1	4	0.91	4	1	4	1	4	1	4	1	4	5	1	0.97	-0.03	0.343953	0.723747	1	16601834	16602149	AluJr	+	J	r	34	0.71	2	0.13	0.35	11	0.36	0.49	1776	193	0	22	316	5	149	3.16	47.15	0.29
14487	0.92	6	0.49	6	0.83	3	0.69	6	0.9	4	0.95	4	7	0.846667	0.746667	-0.1	0.494976	0.808377	1	16602222	16602476	AluSx	+	S	x	19	0.84	5	0.22	0.43	15	0.51	0.49	1480	122	192	12	255	7	131	5.49	51.37	0.42
14488	0.6	5	1	5	0.88	4	1	4	1	3	1	4	14	1	0.826667	-0.173333	0.0901286	0.500778	1	16602595	16602904	AluY	+	Y	None	30	0.9	8	0.31	0.45	2	0.11	0.38	2557	71	3	0	310	14	166	9.03	53.55	0.63
14492	0.96	8	0.71	7	0.55	8	0.95	4	1	5	0.81	7	13	0.92	0.74	-0.18	0.224333	0.663885	1	16605258	16605570	AluSp	-	S	p	0	0	9	0.42	0.41	4	0.2	0.4	2347	83	10	22	313	13	169	8.31	53.99	0.57
14508	1	6	0.92	6	0.94	8	0.64	7	1	6	1	6	9	0.88	0.953333	0.0733333	0.995526	1	1	16611491	16611673	AluSx	+	S	x	35	0.74	8	0.28	0.48	5	0.21	0.45	1880	126	14	25	183	9	100	9.84	54.64	0.66
14510	0.94	6	0.91	5	1	6	0.96	5	1	6	0.89	6	6	0.946667	0.95	0.00333333	0.944248	1	1	16612353	16612663	AluJo	-	J	o	0	0	8	0.3	0.48	3	0.12	0.46	1439	158	74	74	311	6	160	3.86	51.45	0.3
14520	0.95	4	0.92	4	1	4	0.92	3	0.97	4	0.97	4	4	0.953333	0.956667	0.00333333	0.794382	0.957647	1	16618809	16619091	AluJr	-	J	r	0	0	1	0.05	0.39	0	0	0.37	1438	156	106	21	283	4	141	2.83	49.82	0.23
14527	0.8	3	0.69	3	0.83	3	0.87	3	0.83	4	0.97	4	13	0.89	0.773333	-0.116667	0.151048	0.567347	1	16624075	16624380	AluY	+	Y	None	19	1	5	0.21	0.44	8	0.28	0.48	2410	72	0	20	306	13	166	8.5	54.25	0.58
14529	1	3	1	4	1	4	1	3	0.88	4	1	3	11	0.96	1	0.04	0.332932	0.723448	1	16625009	16625304	AluSx1	-	S	x1	0	0	7	0.28	0.45	11	0.43	0.46	2426	84	0	0	296	11	161	7.43	54.39	0.51
14532	1	4	1	4	1	4	0.93	4	1	4	1	4	6	0.976667	1	0.0233333	0.35706	0.724797	1	16627389	16627693	AluSz	-	S	z	0	0	3	0.15	0.4	7	0.27	0.45	2307	102	3	3	305	6	158	3.93	51.8	0.29
14536	0.98	3	1	3	1	3	0.95	3	0.87	3	0.89	3	3	0.903333	0.993333	0.09	0.0065253	0.245855	1	16628756	16628811	AluJb	+	J	b	0	0	3	0.18	0.37	10	0.33	0.5	536	221	36	58	56	3	32	10.71	57.14	0.68
14545	0.85	3	1	3	1	3	1	3	1	3	0.93	3	3	0.976667	0.95	-0.0266667	0.797554	0.95904	1	16631929	16632225	AluJb	+	J	b	17	0.88	6	0.26	0.43	7	0.28	0.45	1864	155	17	10	297	3	151	2.02	50.84	0.16
14567	0.95	4	1	4	1	4	0.91	4	1	4	1	5	13	0.97	0.983333	0.0133333	0.818389	0.966295	1	16641135	16641399	AluY	+	Y	None	21	0.9	7	0.35	0.4	6	0.32	0.39	2150	79	0	0	265	13	142	9.81	53.58	0.7
14576	0.87	5	0.81	4	0.8	4	0.75	4	0.75	4	0.73	4	8	0.743333	0.826667	0.0833333	0.212942	0.650807	1	16646574	16646874	AluSq	+	S	q	19	1	14	0.48	0.48	5	0.23	0.42	2314	100	3	3	301	8	154	5.32	51.16	0.41
14583	1	4	0.95	7	1	5	0.69	4	1	3	0.87	5	10	0.853333	0.983333	0.13	0.207336	0.643608	1	16650010	16650316	AluSz	+	S	z	27	0.96	10	0.42	0.44	3	0.2	0.34	2288	88	23	16	307	10	159	6.51	51.79	0.49
14584	1	5	1	6	1	6	1	4	1	6	0.81	4	6	0.936667	1	0.0633333	0.32082	0.723448	1	16651032	16651340	AluJo	+	J	o	30	0.8	3	0.24	0.32	2	0.09	0.42	1833	181	7	0	309	6	148	3.88	47.9	0.34
14599	1	3	1	3	1	3	1	3	1	4	1	3	10	1	1	0	1	1	1	16658265	16658568	AluSp	+	S	p	23	0.91	14	0.47	0.49	1	0.1	0.29	2400	89	7	0	304	10	155	6.58	50.99	0.51
14603	0.12	4	0.25	4	1	4	1	4	0.93	5	1	5	5	0.976667	0.456667	-0.52	0.125116	0.531545	1	16661440	16661572	AluJo	+	J	o	16	0.94	1	0.08	0.33	5	0.21	0.44	800	188	0	0	133	5	69	7.52	51.88	0.56
14625	1	3	1	3	0.76	3	1	3	0.92	3	1	3	3	0.973333	0.92	-0.0533333	0.735437	0.934307	1	16668913	16669093	AluJb	+	J	b	17	1	14	0.42	0.52	3	0.13	0.44	1671	179	10	20	181	3	93	3.31	51.38	0.25
14626	0.75	4	1	4	0.92	4	0.75	4	0.96	4	1	4	4	0.903333	0.89	-0.0133333	0.854835	0.978102	1	16669757	16670063	AluJb	+	J	b	22	0.86	2	0.09	0.41	10	0.35	0.48	1722	186	10	16	307	4	152	2.61	49.51	0.21
14638	0.8	5	0.92	6	1	6	0.84	8	0.8	5	0.8	5	14	0.813333	0.906667	0.0933333	0.186313	0.618797	1	16674206	16674517	AluY	+	Y	None	30	0.93	5	0.18	0.47	8	0.44	0.38	2429	77	3	16	312	14	161	8.97	51.6	0.68
14639	1	4	0.8	5	1	5	0.93	5	0.79	6	1	4	12	0.906667	0.933333	0.0266667	0.609421	0.876031	1	16674913	16675219	AluSx1	+	S	x1	24	0.88	9	0.57	0.36	1	0.07	0.34	2258	91	10	16	307	12	162	7.82	52.77	0.58
14647	0.96	3	0.94	3	0.79	3	1	3	1	3	1	3	3	1	0.896667	-0.103333	0.0118941	0.300962	1	16681399	16681695	AluJo	+	J	o	17	0.76	7	0.25	0.48	15	0.6	0.45	1692	189	10	7	297	3	151	2.02	50.84	0.16
14695	0.8	5	0.8	9	0.95	5	0.67	9	1	7	0.72	12	17	0.796667	0.85	0.0533333	0.889464	0.989036	1	16701368	16701670	AluSg	-	S	g	0	0	4	0.16	0.44	12	0.42	0.48	2419	92	0	0	303	17	167	11.22	55.12	0.74
14696	0.46	7	0.76	7	0.64	6	0.91	8	0.94	8	0.94	9	9	0.93	0.62	-0.31	0.00640179	0.244725	1	16701811	16702107	AluSx	-	S	x	0	0	18	0.66	0.47	8	0.32	0.45	2069	121	14	3	297	9	155	6.06	52.19	0.45
14698	0.88	3	0.67	3	0.89	3	1	3	0.86	3	1	3	3	0.953333	0.813333	-0.14	0.0752457	0.500778	1	16703345	16703466	FLAM_A	-	FLAM_A	None	0	0	10	0.39	0.46	7	0.24	0.48	488	205	8	66	122	3	69	4.92	56.56	0.31
14703	0.8	5	0	6	0.33	3	1	6	0.71	6	0.8	5	14	0.836667	0.376667	-0.46	0.102344	0.504655	1	16705618	16705897	AluY	-	Y	None	0	0	10	0.29	0.52	8	0.34	0.44	2227	68	57	0	280	14	157	10	56.07	0.64
14709	0.57	7	0.97	6	1	6	1	4	1	6	0.57	7	13	0.856667	0.846667	-0.01	0.833536	0.971827	1	16706962	16707262	AluSp	-	S	p	0	0	6	0.22	0.47	5	0.19	0.46	2283	100	3	10	301	13	164	8.64	54.49	0.58
14716	0.78	6	0.88	5	1	3	1	3	0.75	4	1	4	8	0.916667	0.886667	-0.03	0.575931	0.857609	1	16708989	16709285	AluSx	-	S	x	0	0	10	0.28	0.54	10	0.37	0.47	2230	111	7	3	297	8	156	5.39	52.53	0.4
14738	1	3	1	3	0.8	5	0.8	5	0.94	5	0.62	4	5	0.786667	0.933333	0.146667	0.134397	0.545821	1	16727808	16728082	AluJr	-	J	r	0	0	10	0.28	0.53	8	0.31	0.47	1825	156	0	4	275	5	147	3.64	53.45	0.26
14741	0.75	4	1	5	0.75	4	0.9	5	1	5	1	4	7	0.966667	0.833333	-0.133333	0.273532	0.720706	1	16729230	16729414	AluJb	+	J	b	0	0	14	0.42	0.52	6	0.18	0.51	1049	130	492	0	185	7	107	7.57	57.84	0.46
14744	0.96	6	0.64	4	0.68	4	0.87	5	0.75	5	0.74	6	6	0.786667	0.76	-0.0266667	0.859519	0.980345	1	16731034	16731322	AluJb	+	J	b	19	0.74	10	0.34	0.49	4	0.11	0.54	1722	187	28	0	289	6	151	4.15	52.25	0.31
14745	1	3	0.94	4	0.81	4	1	4	0.89	3	1	4	4	0.963333	0.916667	-0.0466667	0.487637	0.80341	1	16731716	16731997	AluSx	+	S	x	25	0.84	5	0.15	0.52	4	0.13	0.5	1528	156	110	21	282	4	140	2.84	49.65	0.23
14748	1	3	1	3	1	3	1	3	1	3	0.83	3	5	0.943333	1	0.0566667	0.323295	0.723448	1	16732607	16732778	AluSx	-	S	x	0	0	4	0.13	0.5	5	0.19	0.46	1170	157	0	0	172	5	91	5.81	52.91	0.42
14784	0.42	3	0.72	3	0.47	4	1	4	1	4	0.67	3	4	0.89	0.536667	-0.353333	0.0450674	0.453272	1	16750903	16751208	AluJb	-	J	b	0	0	6	0.3	0.42	10	0.35	0.48	2018	157	20	0	306	4	157	2.61	51.31	0.2
14794	1	4	1	3	0.62	7	0.94	8	1	4	1	3	10	0.98	0.873333	-0.106667	0.593344	0.867169	1	16755658	16755923	AluJo	-	J	o	0	0	5	0.16	0.49	12	0.41	0.49	1361	162	147	4	266	10	146	7.52	54.89	0.5
14813	0.92	6	0.83	3	0.77	5	0.92	6	0.78	6	0.76	5	12	0.82	0.84	0.02	0.836942	0.973178	1	16766330	16766638	AluSx	-	S	x	0	0	9	0.32	0.49	20	0.53	0.57	2415	100	0	0	309	12	163	7.77	52.75	0.57
14814	1	5	1	4	1	3	0.81	5	0.9	5	0.42	3	13	0.71	1	0.29	0.00384659	0.208053	1	16768473	16768772	AluSp	-	S	p	0	0	13	0.57	0.43	6	0.22	0.47	2389	87	3	0	300	13	160	8.67	53.33	0.62
14815	1	4	1	6	0.7	5	0.9	6	0.89	6	0.81	4	6	0.866667	0.9	0.0333333	0.260244	0.706112	1	16769142	16769423	AluJb	+	J	b	7	0.86	10	0.34	0.49	3	0.14	0.41	1693	181	21	0	282	6	153	4.26	54.26	0.29
14850	0.94	6	0.97	7	0.78	9	1	9	1	8	1	7	11	1	0.896667	-0.103333	0.0208544	0.364022	1	16791833	16792111	AluSc	+	S	c	7	0.86	12	0.36	0.52	3	0.11	0.47	2016	108	29	4	279	11	162	7.89	58.06	0.47
14871	0.75	4	0.89	3	0.93	5	0.75	4	1	3	1	3	6	0.916667	0.856667	-0.06	0.232367	0.673906	1	16807228	16807455	AluSx1	+	S	x1	1	1	3	0.14	0.42	7	0.25	0.48	1697	105	26	0	228	6	122	5.26	53.51	0.37
14915	1	5	1	7	1	6	0.95	7	1	3	0.89	3	8	0.946667	1	0.0533333	0.105671	0.506836	1	16826861	16826994	AluSx	-	S	x	0	0	25	0.7	0.54	7	0.21	0.52	2003	96	40	14	134	8	69	11.94	51.49	0.91
14944	0.86	7	0.72	9	0.75	8	0.71	8	1	5	0.75	6	12	0.82	0.776667	-0.0433333	0.445702	0.778397	1	16858036	16858320	AluSz	+	S	z	5	1	11	0.43	0.45	2	0.1	0.4	1935	147	3	0	285	12	149	8.42	52.28	0.62
14984	0.58	7	0.97	8	0.82	7	0.84	6	0.88	6	0.86	7	8	0.86	0.79	-0.07	0.955558	1	1	16938486	16938782	AluJb	-	J	b	0	0	3	0.21	0.34	8	0.39	0.41	1992	152	3	0	297	8	157	5.39	52.86	0.39
15000	0.7	5	1	4	1	5	1	6	1	5	0.97	6	11	0.99	0.9	-0.09	0.484187	0.801031	1	16951777	16952066	AluSc8	-	S	c8	0	0	7	0.25	0.48	12	0.24	0.64	2159	90	31	7	290	11	160	7.59	55.17	0.5
15014	1	5	0.67	3	0.92	6	1	4	1	3	1	3	8	1	0.863333	-0.136667	0.10111	0.503913	1	16959129	16959431	AluSx	-	S	x	0	0	6	0.14	0.58	11	0.24	0.6	2100	139	7	0	303	8	158	5.28	52.15	0.39
15017	0.9	5	0.96	5	0.98	5	1	5	1	4	1	6	10	1	0.946667	-0.0533333	0.0349301	0.424532	1	16960975	16961292	AluSx	+	S	x	30	0.9	5	0.2	0.46	11	0.47	0.43	2344	107	0	19	318	10	168	6.29	52.83	0.45
15018	0.96	9	0.97	8	0.93	7	0.91	9	0.96	10	1	8	11	0.956667	0.953333	-0.00333333	0.702059	0.919184	1	16961526	16961832	AluSx	-	S	x	0	0	9	0.4	0.43	2	0.1	0.4	2296	117	0	0	307	11	159	7.17	51.79	0.54
15022	0.94	4	0.91	4	0.87	4	0.89	4	0.82	4	0.9	4	4	0.87	0.906667	0.0366667	0.412374	0.754154	1	16963342	16963572	AluJb	+	J	b	12	0.42	9	0.39	0.43	13	0.42	0.5	1251	212	9	0	231	4	126	3.46	54.55	0.23
15023	1	8	0.92	9	1	10	0.98	9	1	8	0.83	9	13	0.936667	0.973333	0.0366667	0.639365	0.891028	1	16963766	16964070	AluSq2	+	S	q2	21	1	5	0.18	0.47	11	0.37	0.49	2171	125	3	7	305	13	160	8.52	52.46	0.63
15035	1	4	0.67	4	0.75	4	0.8	5	0.9	5	0.78	3	9	0.826667	0.806667	-0.02	0.667337	0.904394	1	16980495	16980760	AluSx1	-	S	x1	0	0	6	0.39	0.35	3	0.19	0.36	1894	109	26	8	266	9	148	6.77	55.64	0.45
15051	0.78	12	0.55	9	0.62	13	0.95	12	0.88	10	0.8	10	14	0.876667	0.65	-0.226667	0.0505554	0.469106	1	17003793	17004100	AluSz	-	S	z	0	0	8	0.32	0.46	19	0.54	0.54	2156	110	10	23	308	14	154	9.09	50	0.73
15142	0.83	3	0.62	4	0.83	3	0.56	4	0.69	4	0.71	4	4	0.653333	0.76	0.106667	0.291361	0.723448	1	17202052	17202175	FLAM_C	+	FLAM_C	None	17	0.82	27	0.8	0.53	5	0.23	0.42	424	202	121	73	124	4	58	6.45	46.77	0.59
15143	0.88	4	0.27	4	0.21	4	0.62	5	0.59	7	0.82	6	8	0.676667	0.453333	-0.223333	0.413167	0.754923	1	17202591	17202874	AluSz	-	S	z	0	0	3	0.15	0.41	13	0.49	0.46	1841	155	7	0	284	8	146	5.63	51.41	0.43
15144	0.8	5	0.6	6	0.52	5	0.75	4	0.7	5	1	5	12	0.816667	0.64	-0.176667	0.226423	0.666601	1	17203066	17203286	AluY	+	Y	None	0	0	8	0.33	0.44	1	0.04	0.46	1801	63	5	5	221	12	129	10.86	58.37	0.66
15165	0.17	6	0	4	0.45	7	0	9	0.43	7	0	8	21	0.143333	0.206667	0.0633333	0.5677	0.854056	1	17230521	17230805	AluYc3	-	Y	c3	0	0	4	0.21	0.39	11	0.5	0.42	2329	42	3	14	285	21	164	14.74	57.54	0.91
15174	0.5	5	0.62	9	0.71	7	0.92	4	1	9	0.71	11	12	0.876667	0.61	-0.266667	0.077454	0.500778	1	17239685	17239948	AluSg7	+	S	g7	14	1	9	0.26	0.53	38	0.82	0.61	1855	102	102	0	264	12	145	9.09	54.92	0.61
15193	0.94	4	0.94	4	0.63	4	0.85	4	0.76	3	0.63	4	9	0.746667	0.836667	0.09	0.309116	0.723448	1	17250170	17250472	AluSx	-	S	x	0	0	15	0.36	0.58	14	0.33	0.58	2302	106	10	0	303	9	156	5.94	51.49	0.45
15264	0.83	3	0.83	3	1	3	0.63	4	0.92	4	0.88	4	6	0.81	0.886667	0.0766667	0.410837	0.752848	1	17287858	17288064	AluJr	-	J	r	0	0	43	0.71	0.69	4	0.15	0.46	1485	121	19	0	207	6	120	5.8	57.97	0.35
15265	0.92	3	1	3	0.56	3	1	3	0.96	3	1	3	3	0.986667	0.826667	-0.16	0.211942	0.64935	1	17288098	17288383	AluJb	-	J	b	0	0	18	0.43	0.58	13	0.46	0.48	1574	189	63	28	286	3	141	2.1	49.3	0.17
15275	0.78	6	0.93	5	1	8	1	6	1	7	0.9	5	11	0.966667	0.903333	-0.0633333	0.421623	0.761082	1	17291178	17291475	AluSx	-	S	x	0	0	9	0.29	0.51	6	0.16	0.56	2144	123	10	0	298	11	156	7.38	52.35	0.54
15287	0.58	4	0.48	4	0.67	3	0.68	4	0.71	4	1	4	4	0.796667	0.576667	-0.22	0.179759	0.609735	1	17307632	17307777	FLAM_C	-	FLAM_C	None	0	0	28	0.51	0.67	7	0.22	0.53	659	192	0	96	146	4	81	5.48	55.48	0.36
15306	0.88	10	0.98	8	0.93	9	0.96	12	0.93	9	0.95	10	12	0.946667	0.93	-0.0166667	0.900339	0.992503	1	17319717	17320002	AluJb	-	J	b	0	0	10	0.32	0.5	14	0.29	0.63	1850	129	49	21	286	12	165	8.39	57.69	0.51
15313	0.94	4	1	3	1	5	0.7	5	1	4	1	3	9	0.9	0.98	0.08	0.628983	0.884562	1	17324702	17325000	AluSx	-	S	x	0	0	5	0.15	0.54	12	0.42	0.48	2044	151	0	3	299	9	157	6.02	52.51	0.45
15333	0.64	7	0.95	4	1	4	0.95	5	1	5	1	5	10	0.983333	0.863333	-0.12	0.294856	0.723448	1	17333391	17333671	AluSx	-	S	x	0	0	7	0.2	0.53	11	0.28	0.56	2025	107	50	0	281	10	155	7.12	55.16	0.47
15338	0.87	5	0.56	3	0.67	3	0.7	5	1	5	0.58	4	11	0.76	0.7	-0.06	0.477542	0.79655	1	17335164	17335469	AluY	+	Y	None	31	0.74	6	0.17	0.53	5	0.14	0.54	2243	72	20	46	306	11	169	7.19	55.23	0.48
15349	0.73	4	0.86	4	0.92	3	0.62	4	1	4	0.89	3	4	0.836667	0.836667	0	0.595282	0.867462	1	17341723	17341883	FRAM	-	FRAM	None	0	0	6	0.22	0.47	8	0.34	0.44	858	192	37	0	161	4	84	4.97	52.17	0.37
15354	1	5	1	5	1	5	1	5	1	5	0.88	5	5	0.96	1	0.04	0.332932	0.723448	1	17344038	17344215	FAM	-	FAM	None	0	0	13	0.46	0.47	12	0.38	0.51	1110	180	6	0	178	5	93	5.62	52.25	0.42
15355	0.83	6	0.83	6	0.93	7	0.95	7	0.86	7	0.92	6	10	0.91	0.863333	-0.0466667	0.396381	0.746882	1	17344356	17344663	AluSz	-	S	z	0	0	7	0.28	0.45	6	0.19	0.5	2233	117	3	3	308	10	168	6.49	54.55	0.45
15378	1	4	0.92	4	1	4	1	4	1	3	0.93	5	8	0.976667	0.973333	-0.00333333	0.959563	1	1	17360929	17361174	AluSz	-	S	z	0	0	5	0.23	0.42	4	0.24	0.37	1942	102	4	0	246	8	133	6.5	54.07	0.45
15390	1	5	1	6	1	7	0.93	7	0.96	6	0.8	5	11	0.896667	1	0.103333	0.00943377	0.279945	1	17367885	17368184	AluSx	+	S	x	48	0.69	9	0.46	0.4	5	0.2	0.45	2183	110	27	0	300	11	158	7.33	52.67	0.53
15432	0.88	4	0.54	4	0.62	4	0.94	4	0.78	4	0.83	4	4	0.85	0.68	-0.17	0.215973	0.654606	1	17392647	17392955	AluJo	-	J	o	0	0	8	0.24	0.51	6	0.21	0.48	1889	146	3	32	309	4	157	2.59	50.81	0.2
15515	0.83	6	0.41	4	0.59	5	0.89	6	0.96	4	0.85	4	12	0.9	0.61	-0.29	0.0456716	0.455273	1	17460259	17460561	AluY	-	Y	None	0	0	7	0.17	0.57	6	0.18	0.51	2305	76	0	10	303	12	161	7.92	53.14	0.57
15517	0.8	5	1	4	1	3	0.8	5	0.9	6	0.77	5	8	0.823333	0.933333	0.11	0.110218	0.512309	1	17463315	17463618	AluSz	-	S	z	0	0	11	0.27	0.58	5	0.22	0.43	2148	105	0	7	304	8	156	5.26	51.32	0.4
15527	1	7	0.9	5	0.92	3	0.92	6	0.89	7	0.96	8	13	0.923333	0.94	0.0166667	0.543753	0.839739	1	17472575	17472862	AluSc	-	S	c	0	0	3	0.14	0.42	3	0.12	0.45	2061	94	38	0	288	13	152	9.03	52.78	0.65
15565	1	4	0.69	4	1	5	0.89	3	1	3	0.76	5	6	0.883333	0.896667	0.0133333	0.637359	0.889689	1	17517566	17517845	AluSz	+	S	z	8	0.88	4	0.1	0.56	15	0.47	0.5	1907	111	54	18	280	6	149	4.29	53.21	0.31
15578	1	4	0.92	4	1	5	0.84	5	0.8	5	0.8	5	7	0.813333	0.973333	0.16	0.0168531	0.336551	1	17528893	17529193	AluSg	-	S	g	0	0	2	0.07	0.47	2	0.08	0.47	2264	120	3	0	301	7	153	4.65	50.83	0.36
15583	1	5	0.62	4	1	4	0.76	5	1	5	0.83	4	8	0.863333	0.873333	0.01	0.630146	0.885346	1	17533170	17533475	AluSx1	-	S	x1	0	0	4	0.12	0.51	4	0.13	0.5	2288	101	20	0	306	8	152	5.23	49.67	0.43
15619	1	3	0.75	4	0.93	3	0.8	5	1	4	0.76	6	6	0.853333	0.893333	0.04	0.784892	0.954083	1	17562968	17563279	AluJb	+	J	b	32	0.75	2	0.09	0.43	9	0.28	0.51	1785	173	26	26	312	6	165	3.85	52.88	0.29
15646	1	7	0.61	6	1	6	0.97	7	0.82	7	0.83	6	9	0.873333	0.87	-0.00333333	0.481412	0.799304	1	17583251	17583554	AluSx1	+	S	x1	28	1	5	0.12	0.57	6	0.2	0.48	2359	95	16	0	304	9	158	5.92	51.97	0.45
15650	0.56	6	0.35	6	0.65	8	0.71	7	0.82	8	0.75	4	11	0.76	0.52	-0.24	0.0708361	0.500778	1	17585566	17585893	AluSz	-	S	z	0	0	8	0.24	0.52	15	0.37	0.57	2067	94	0	88	328	11	178	6.71	54.27	0.46
15664	0.58	4	0.34	5	0.9	3	0.94	3	1	3	0.79	4	7	0.91	0.606667	-0.303333	0.0973334	0.501285	1	17595382	17595679	AluJb	-	J	b	0	0	10	0.42	0.44	6	0.3	0.4	2076	148	3	0	298	7	152	4.7	51.01	0.37
15677	0.8	5	0.56	4	0.7	4	0.97	4	0.72	4	0.87	4	6	0.853333	0.686667	-0.166667	0.15242	0.569904	1	17604728	17605022	AluJb	-	J	b	0	0	7	0.18	0.56	6	0.22	0.47	1944	159	24	3	295	6	151	4.07	51.19	0.31
15693	0.56	3	0.53	5	0.58	5	0.72	3	0.88	4	0.63	4	5	0.743333	0.556667	-0.186667	0.120521	0.52372	1	17621011	17621294	AluJr	+	J	r	23	0.74	9	0.32	0.47	16	0.55	0.49	1596	158	21	32	284	5	141	3.52	49.65	0.29
15735	0.93	3	0.5	3	0.87	3	0.83	3	0.9	3	1	3	9	0.91	0.766667	-0.143333	0.280906	0.723448	1	17643783	17644063	AluSq2	-	S	q2	0	0	9	0.28	0.51	7	0.25	0.48	2255	78	7	7	281	9	156	6.41	55.52	0.42
15772	0.8	5	0.78	6	0.63	6	0.88	5	0.89	6	0.95	6	6	0.906667	0.736667	-0.17	0.0415361	0.443785	1	17679677	17679910	AluJr	+	J	r	5	0.4	14	0.48	0.54	6	0.2	0.5	1356	141	21	47	234	6	126	5.13	53.85	0.35
15775	0.5	3	0.4	5	0.73	3	0.71	7	0.36	6	0.8	5	9	0.623333	0.543333	-0.08	0.617823	0.879191	1	17681765	17682049	AluSx	+	S	x	16	1	6	0.2	0.5	3	0.1	0.49	2177	95	46	0	285	9	153	6.32	53.68	0.44
15783	1	4	0.5	3	0.43	7	1	4	0.81	6	0.8	5	9	0.87	0.643333	-0.226667	0.558004	0.848343	1	17686503	17686805	AluSx1	+	S	x1	17	0.94	6	0.21	0.48	8	0.24	0.51	2125	145	0	3	303	9	156	5.94	51.49	0.45
15827	0.52	4	0.31	4	0.89	3	1	4	0.91	4	0.92	6	9	0.943333	0.573333	-0.37	0.0450789	0.453272	1	17713962	17714250	AluY	+	Y	None	5	1	6	0.18	0.52	4	0.17	0.44	2067	104	10	21	289	9	154	6.23	53.29	0.44
15830	1	4	0.92	6	1	4	0.92	6	0.92	6	1	4	10	0.946667	0.973333	0.0266667	0.473944	0.794093	1	17717714	17718014	AluSx	-	S	x	0	0	6	0.25	0.44	12	0.3	0.56	2228	126	0	0	301	10	163	6.64	54.15	0.46
15831	0.88	4	0.63	3	0.37	3	0.88	4	0.98	4	0.9	4	4	0.92	0.626667	-0.293333	0.0649127	0.500778	1	17718152	17718300	AluSx1	+	S	x1	11	0.64	13	0.38	0.53	10	0.24	0.58	897	154	20	20	149	4	82	5.37	55.03	0.37
15847	0.88	4	0.33	3	0.68	3	0.83	3	0.75	4	0.7	4	8	0.76	0.63	-0.13	0.545178	0.840101	1	17731758	17732038	AluSz	+	S	z	5	1	7	0.17	0.58	14	0.36	0.56	2217	82	21	0	281	8	154	5.69	54.8	0.38
15850	0.97	6	0.97	6	0.97	6	0.96	6	0.95	6	1	6	6	0.97	0.97	0	0.868506	0.983318	1	17739800	17739928	FLAM_A	+	FLAM_A	None	14	0.86	7	0.2	0.53	11	0.29	0.55	749	202	0	0	129	6	72	9.3	55.81	0.6
15853	0.94	6	1	7	1	5	1	7	1	8	0.85	8	9	0.95	0.98	0.03	0.754247	0.942089	1	17741122	17741415	AluJb	-	J	b	0	0	7	0.28	0.45	2	0.09	0.43	1646	177	58	17	294	9	160	6.12	54.42	0.43
15856	0.97	5	0.74	6	1	4	0.9	5	0.91	5	0.91	5	7	0.906667	0.903333	-0.00333333	0.459304	0.782684	1	17743882	17744200	AluSx1	+	S	x1	21	0.9	7	0.27	0.46	5	0.22	0.42	1977	128	3	50	319	7	165	4.39	51.72	0.34
15870	1	3	0.88	3	0.65	3	0.17	3	0.75	4	1	4	9	0.64	0.843333	0.203333	0.601214	0.871159	1	17758312	17758601	AluSq2	+	S	q2	17	0.88	9	0.39	0.43	2	0.06	0.53	2183	90	41	7	290	9	153	6.21	52.76	0.45
15871	0.8	5	0.71	4	1	3	1	3	1	4	1	3	11	1	0.836667	-0.163333	0.0754761	0.500778	1	17759308	17759483	AluY	+	Y	None	30	0.87	3	0.08	0.55	15	0.6	0.45	1360	97	0	0	176	11	99	12.5	56.25	0.81
15872	0.46	4	0.45	7	1	3	0.75	4	1	5	0.83	4	7	0.86	0.636667	-0.223333	0.572274	0.856284	1	17761327	17761597	AluSg	+	S	g	0	0	5	0.16	0.5	7	0.21	0.51	1965	111	30	0	271	7	152	5.17	56.09	0.33
15874	0.67	4	0.74	5	1	4	1	4	0.79	5	1	3	6	0.93	0.803333	-0.126667	0.38109	0.735821	1	17762728	17763014	AluSz6	+	S	z6	12	0.92	9	0.37	0.44	7	0.24	0.48	1924	125	3	24	287	6	150	4.18	52.26	0.31
15892	0.92	4	0.94	4	0.67	4	1	4	0.9	4	0.77	4	5	0.89	0.843333	-0.0466667	0.541492	0.838556	1	17775028	17775306	AluJo	-	J	o	0	0	6	0.24	0.45	11	0.33	0.52	1685	165	86	4	279	5	133	3.58	47.67	0.32
15897	0.75	3	1	3	0.64	3	1	3	0.89	3	0.85	3	3	0.913333	0.796667	-0.116667	0.621585	0.880738	1	17776987	17777130	AluJb	+	J	b	1	1	4	0.17	0.43	11	0.36	0.5	1399	198	22	77	144	3	75	4.17	52.08	0.32
15910	0.93	7	0.73	8	0.88	4	0.76	5	0.67	6	0.82	7	12	0.75	0.846667	0.0966667	0.242588	0.685608	1	17780833	17781126	AluSc8	+	S	c8	10	1	13	0.41	0.5	29	0.73	0.57	2020	122	7	17	294	12	157	8.16	53.4	0.58
15912	0.94	11	0.95	12	0.82	17	0.97	11	1	9	0.96	13	19	0.976667	0.903333	-0.0733333	0.0814196	0.500778	1	17781284	17781596	AluSp	+	S	p	10	0.8	20	0.6	0.52	15	0.47	0.51	1878	80	38	102	313	19	175	12.14	55.91	0.79
15916	0.67	3	0.5	3	0.72	3	0.89	3	0.56	3	0.67	3	3	0.706667	0.63	-0.0766667	0.494522	0.807995	1	17783139	17783312	AluJb	-	J	b	5	0.8	16	0.55	0.48	10	0.41	0.44	1267	171	0	55	174	3	86	3.45	49.43	0.28
15917	0.67	3	0.69	4	1	4	1	5	1	7	1	5	8	1	0.786667	-0.213333	0.071928	0.500778	1	17783313	17783605	AluSz	-	S	z	0	0	12	0.41	0.48	6	0.25	0.44	2115	119	24	0	293	8	149	5.46	50.85	0.42
15922	1	3	0.85	4	0.83	3	0.72	4	1	3	1	5	11	0.906667	0.893333	-0.0133333	0.613415	0.877829	1	17784754	17785053	AluSq2	-	S	q2	0	0	15	0.44	0.53	3	0.14	0.44	2386	76	7	7	300	11	162	7.33	54	0.51
15924	0.67	6	0.73	7	0.62	4	0.83	5	0.95	7	0.89	6	9	0.89	0.673333	-0.216667	0.0276065	0.395227	1	17785812	17786109	AluSx	+	S	x	16	0.88	2	0.09	0.44	11	0.36	0.49	2094	141	0	0	298	9	159	6.04	53.36	0.44
15965	0.67	6	0.72	9	0.67	3	0.93	7	0.94	5	1	7	15	0.956667	0.686667	-0.27	0.00986237	0.28491	1	17801270	17801564	AluSx4	-	S	x4	0	0	4	0.18	0.43	6	0.28	0.42	2172	98	51	3	295	15	162	10.17	54.92	0.68
15978	0	3	0.33	3	0.15	3	0.59	3	0.5	4	0.77	3	4	0.62	0.16	-0.46	0.0435664	0.449515	1	17806343	17806654	AluJb	+	J	b	30	0.9	7	0.3	0.44	7	0.25	0.47	2054	138	13	13	312	4	158	2.56	50.64	0.2
15983	0.92	4	0.33	3	1	3	0.9	5	0.67	6	0.85	4	13	0.806667	0.75	-0.0566667	0.705658	0.920535	1	17808712	17809017	AluSx1	-	S	x1	0	0	13	0.39	0.51	16	0.47	0.52	2226	69	7	62	306	13	172	8.5	56.21	0.55
15994	0.6	5	0.79	7	1	5	0.79	4	0.79	6	0.9	7	10	0.826667	0.796667	-0.03	0.689245	0.913121	1	17812361	17812673	AluSc	+	S	c	30	0.9	11	0.37	0.52	11	0.34	0.51	2376	105	0	13	313	10	164	6.39	52.4	0.47
15997	0.83	6	0.86	7	0.88	5	0.94	6	1	6	1	6	10	0.98	0.856667	-0.123333	0.0160135	0.331572	1	17813816	17814127	AluSx	-	S	x	0	0	9	0.31	0.48	8	0.24	0.52	2077	128	0	32	312	10	168	6.41	53.85	0.45
16004	0.75	4	1	5	0.67	4	0.75	6	1	4	0.6	5	11	0.783333	0.806667	0.0233333	0.95113	1	1	17817005	17817330	AluSp	+	S	p	49	0.82	11	0.33	0.52	4	0.17	0.44	2235	69	22	0	326	11	171	6.75	52.45	0.49
16023	0.5	3	0.62	4	0.92	6	0.88	4	0.58	4	1	3	11	0.82	0.68	-0.14	0.346826	0.723747	1	17826579	17826882	AluY	-	Y	None	0	0	3	0.15	0.4	7	0.3	0.43	2409	92	0	0	304	11	166	7.24	54.61	0.49
16040	0.92	4	0.93	7	1	5	1	4	1	7	0.86	7	11	0.953333	0.95	-0.00333333	0.677517	0.90877	1	17832608	17832898	AluSp	-	S	p	0	0	7	0.22	0.51	7	0.21	0.52	2328	82	3	3	291	11	156	7.56	53.61	0.53
16072	1	3	0.79	3	0.92	3	1	3	0.91	3	0.67	3	4	0.86	0.903333	0.0433333	0.856845	0.978691	1	17845829	17846131	AluJb	+	J	b	30	0.77	12	0.36	0.52	8	0.21	0.55	1960	155	16	0	303	4	156	2.64	51.49	0.2
16090	1	4	0.94	4	1	4	1	4	1	4	1	4	5	1	0.98	-0.02	0.367384	0.72739	1	17852217	17852526	AluSz	+	S	z	29	0.93	7	0.23	0.49	2	0.06	0.51	2192	148	3	0	310	5	157	3.23	50.65	0.26
16100	0.44	3	0.6	6	1	6	0.89	3	0.58	6	0.52	5	9	0.663333	0.68	0.0166667	0.622653	0.881425	1	17857230	17857530	AluSx1	+	S	x1	30	0.9	1	0.04	0.48	6	0.18	0.52	2230	96	40	3	301	9	151	5.98	50.17	0.49
16124	1	3	0.67	4	1	3	0.65	6	1	4	1	3	9	0.883333	0.89	0.00666667	0.986061	1	1	17870792	17871089	AluSq2	-	S	q2	0	0	5	0.18	0.48	5	0.25	0.41	2292	84	0	17	298	9	161	6.04	54.03	0.42
16141	0.86	7	0.95	5	0.73	6	0.79	6	1	5	0.89	5	7	0.893333	0.846667	-0.0466667	0.496363	0.809576	1	17881071	17881385	AluJo	-	J	o	0	0	6	0.15	0.57	2	0.09	0.42	1959	171	6	16	315	7	158	4.44	50.16	0.36
16200	0.59	7	0.41	7	0.15	6	0.46	7	0.37	7	0.5	7	7	0.443333	0.383333	-0.06	0.608928	0.875716	1	17923254	17923423	AluSx	+	S	x	0	0	10	0.25	0.56	7	0.18	0.57	1066	94	0	82	170	7	93	8.24	54.71	0.56
16311	0.83	3	0.2	3	0.28	3	0.93	3	0.89	3	0.73	3	4	0.85	0.436667	-0.413333	0.070291	0.500778	1	18034825	18035159	AluJo	+	J	o	54	0.81	5	0.16	0.5	8	0.26	0.5	1951	170	6	3	335	4	165	2.39	49.25	0.2
16313	0.83	3	0.5	4	0.56	6	1	5	0.69	4	0.79	4	10	0.826667	0.63	-0.196667	0.21172	0.648978	1	18035409	18035690	AluY	-	Y	None	0	0	4	0.14	0.49	2	0.07	0.49	2006	72	0	8	282	10	142	7.09	50.35	0.56
16349	0.5	4	0.55	5	0.17	3	0.6	5	0.8	5	0.83	6	9	0.743333	0.406667	-0.336667	0.0592803	0.493701	1	18058516	18058685	AluSc8	+	S	c8	0	0	5	0.14	0.54	13	0.42	0.5	1476	53	0	0	170	9	96	10.59	56.47	0.66
16355	0.96	4	1	3	0.9	12	0.89	9	0.9	8	0.84	8	14	0.876667	0.953333	0.0766667	0.108665	0.510186	1	18060885	18061190	AluSx	+	S	x	30	0.8	17	0.5	0.52	6	0.19	0.5	2158	111	0	20	306	14	160	9.15	52.29	0.67
16373	0.75	4	0.98	5	1	4	0.83	6	1	4	1	4	15	0.943333	0.91	-0.0333333	0.77168	0.948473	1	18074883	18075195	AluY	-	Y	None	0	0	11	0.27	0.57	6	0.26	0.44	2528	73	0	6	313	15	163	9.58	52.08	0.71
16384	0.89	3	1	3	0.53	3	0.86	3	0.78	3	0.8	3	3	0.813333	0.806667	-0.00666667	0.532159	0.832568	1	18080944	18081075	AluJo	+	J	o	14	0.79	2	0.1	0.41	2	0.09	0.42	658	220	0	8	132	3	66	4.55	50	0.36
16389	0.75	4	1	4	0.83	6	1	5	1	5	1	4	11	1	0.86	-0.14	0.07706	0.500778	1	18088066	18088365	AluSx1	-	S	x1	0	0	10	0.3	0.52	13	0.34	0.55	2348	97	0	0	300	11	164	7.33	54.67	0.49
16415	1	3	1	3	0.92	3	1	3	0.93	3	0.88	3	4	0.936667	0.973333	0.0366667	0.435448	0.770845	1	18113768	18114065	AluSz	-	S	z	0	0	3	0.13	0.44	4	0.18	0.42	2031	117	10	24	298	4	156	2.68	52.35	0.2
16426	0.64	6	0.46	6	0.59	5	0.7	6	0.82	4	0.79	6	9	0.77	0.563333	-0.206667	0.065385	0.500778	1	18127079	18127387	AluSg	-	S	g	0	0	6	0.39	0.35	1	0.06	0.36	2208	120	3	10	309	9	155	5.83	50.16	0.47
16443	1	5	0.93	6	0.94	6	0.9	7	0.9	6	0.94	6	7	0.913333	0.956667	0.0433333	0.217116	0.656121	1	18146244	18146513	AluJb	+	J	b	12	1	12	0.33	0.54	8	0.37	0.42	1641	148	93	4	270	7	153	5.19	56.67	0.33
16478	0.5	5	0.12	4	0.79	4	0.65	6	0.83	6	0.67	6	6	0.716667	0.47	-0.246667	0.251824	0.696795	1	18179379	18179695	AluJb	-	J	b	0	0	5	0.13	0.55	6	0.17	0.53	1913	145	9	35	317	6	162	3.79	51.1	0.29
16490	0.6	3	0.67	4	0.68	4	0.5	4	0.83	6	0.64	5	10	0.656667	0.65	-0.00666667	0.859974	0.980569	1	18189526	18189826	AluSz	+	S	z	19	0.84	3	0.33	0.27	3	0.14	0.42	2292	113	0	0	301	10	157	6.64	52.16	0.5
16660	0.8	5	0.53	6	0.52	5	0.71	5	0.93	4	0.85	5	7	0.83	0.616667	-0.213333	0.117476	0.520848	1	18329181	18329494	AluSz	+	S	z	18	1	8	0.25	0.51	8	0.24	0.52	2080	121	3	51	314	7	160	4.46	50.96	0.34
16677	1	4	0.75	6	0.8	5	0.83	6	0.7	5	0.89	6	9	0.806667	0.85	0.0433333	0.456896	0.781132	1	18349961	18350223	AluSg	+	S	g	19	0.84	6	0.2	0.49	1	0.06	0.37	1794	84	114	0	263	9	142	6.84	53.99	0.47
16727	1	3	0.86	7	0.6	5	0.87	5	0.88	8	0.69	8	17	0.813333	0.82	0.00666667	0.565109	0.852471	1	18398170	18398475	AluYb8	+	Y	b8	14	1	9	0.32	0.5	10	0.31	0.53	2470	49	3	16	306	17	170	11.11	55.56	0.74
16863	0.86	7	0.93	7	0.88	4	0.75	5	0.5	4	0.88	4	10	0.71	0.89	0.18	0.136388	0.549242	1	18529793	18530102	AluSz	-	S	z	0	0	2	0.06	0.51	5	0.22	0.43	1959	124	0	0	310	10	166	6.45	53.55	0.45
16925	0.38	4	0.11	3	1	3	0.58	3	0.59	4	0.5	4	6	0.556667	0.496667	-0.06	0.811029	0.962828	1	18607773	18608076	AluSx1	+	S	x1	17	1	6	0.16	0.55	7	0.17	0.57	2048	102	3	23	304	6	156	3.95	51.32	0.3
17150	0.97	5	0.86	5	0.66	5	0.92	5	1	5	0.95	3	7	0.956667	0.83	-0.126667	0.214837	0.653093	1	18823080	18823380	AluSx	+	S	x	22	0.86	1	0.04	0.45	3	0.15	0.4	2199	113	13	3	301	7	160	4.65	53.16	0.34
17165	0.91	4	0.62	4	0.53	5	0.77	5	0.89	5	0.88	6	8	0.846667	0.686667	-0.16	0.31493	0.723448	1	18839888	18840182	AluSc5	+	S	c5	4	1	12	0.4	0.49	4	0.14	0.48	1892	122	10	51	295	8	154	5.42	52.2	0.4
17193	0.44	4	0.48	4	0.19	3	0.36	3	0.69	4	0.37	4	4	0.473333	0.37	-0.103333	0.47292	0.793368	1	18873081	18873200	AluSz6	+	S	z6	24	1	7	0.2	0.53	2	0.07	0.5	907	100	0	8	120	4	54	6.67	45	0.67
17281	0.93	5	0.62	7	0.58	7	0.9	7	0.9	6	0.83	7	10	0.876667	0.71	-0.166667	0.288026	0.723448	1	18940048	18940303	AluSx	+	S	x	2	1	3	0.12	0.45	5	0.2	0.45	1884	114	92	0	256	10	146	7.81	57.03	0.48
17287	0.62	4	0.79	5	1	6	0.88	4	0.81	6	0.96	5	12	0.883333	0.803333	-0.08	0.955668	1	1	18943727	18944033	AluSp	+	S	p	23	0.96	0	0	0.37	12	0.37	0.51	2420	62	13	16	307	12	162	7.82	52.77	0.56
17289	1	4	1	4	0.8	5	0.67	3	0.73	5	1	4	15	0.8	0.933333	0.133333	0.367317	0.72739	1	18944363	18944660	AluY	+	Y	None	15	0.87	10	0.33	0.49	3	0.19	0.36	2340	77	0	10	298	15	164	10.07	55.03	0.67
17293	0.89	6	0.9	5	0.92	7	0.96	7	0.93	7	0.84	7	8	0.91	0.903333	-0.00666667	0.671137	0.906399	1	18946731	18947027	AluSx	-	S	x	0	0	3	0.14	0.42	9	0.26	0.53	2094	135	10	0	297	8	144	5.39	48.48	0.46
17294	1	3	1	3	1	3	0.67	3	1	3	0.93	3	4	0.866667	1	0.133333	0.107219	0.50833	1	18947233	18947540	AluSx1	+	S	x1	26	0.77	12	0.38	0.5	9	0.35	0.46	2151	149	0	0	308	4	157	2.6	50.97	0.2
17295	1	5	0.64	6	0.54	6	0.93	5	0.56	6	0.86	7	7	0.783333	0.726667	-0.0566667	0.87505	0.985353	1	18947802	18948088	AluJb	+	J	b	8	1	4	0.17	0.44	8	0.34	0.44	1771	167	17	3	287	7	152	4.88	52.96	0.35
17300	1	3	1	4	0.75	4	1	6	0.97	4	0.78	3	7	0.916667	0.916667	0	0.822464	0.968341	1	18950590	18950766	AluSp	+	S	p	30	0.8	5	0.19	0.48	5	0.21	0.44	1194	158	0	0	177	7	93	7.91	52.54	0.6
17359	0.94	8	0.92	6	0.8	5	0.6	8	0.83	8	0.93	7	9	0.786667	0.886667	0.1	0.398534	0.748702	1	19010052	19010351	AluSx1	+	S	x1	20	0.75	8	0.3	0.46	9	0.22	0.59	2019	143	7	0	300	9	156	6	52	0.45
17364	0.53	3	0.68	4	0.58	5	0.7	4	0.75	4	1	4	8	0.816667	0.596667	-0.22	0.162272	0.584488	1	19015113	19015437	AluSz6	+	S	z6	30	0.8	10	0.53	0.39	5	0.12	0.58	2154	126	0	40	325	8	165	4.92	50.77	0.38
17385	0.88	4	0.67	3	0.8	5	1	4	0.85	4	0.94	6	8	0.93	0.783333	-0.146667	0.104227	0.506562	1	19032945	19033276	AluSx1	-	S	x1	0	0	12	0.28	0.58	5	0.18	0.47	2167	111	0	63	332	8	172	4.82	51.81	0.37
17509	0.83	6	0.96	6	0.82	6	0.75	6	0.98	5	0.77	7	12	0.833333	0.87	0.0366667	0.978741	1	1	19140579	19140876	AluSx1	+	S	x1	11	0.91	8	0.27	0.48	8	0.18	0.63	2191	111	0	13	298	12	159	8.05	53.36	0.57
17542	0.51	10	0.83	5	0.72	9	0.97	8	0.82	9	0.88	8	11	0.89	0.686667	-0.203333	0.0915552	0.500778	1	19177820	19178122	AluSx3	-	S	x3	0	0	8	0.25	0.51	8	0.24	0.53	2216	116	0	7	303	11	159	7.26	52.48	0.53
17564	0.7	5	0.77	7	0.83	5	0.75	4	0.92	9	0.82	7	9	0.83	0.766667	-0.0633333	0.395989	0.746518	1	19192934	19193255	AluJb	-	J	b	0	0	8	0.24	0.51	4	0.14	0.47	1616	146	9	96	322	9	157	5.59	48.76	0.48
17654	0.96	5	1	4	0.75	4	0.94	4	0.92	4	0.83	6	6	0.896667	0.903333	0.00666667	0.506163	0.815772	1	19260549	19260865	AluJb	-	J	b	0	0	7	0.26	0.47	8	0.43	0.39	2182	123	6	22	317	6	158	3.79	49.84	0.31
17715	0.71	9	0.86	7	0.94	7	0.84	7	0.97	9	0.62	7	10	0.81	0.836667	0.0266667	0.956235	1	1	19300714	19301034	AluSx1	+	S	x1	28	0.89	5	0.15	0.51	7	0.22	0.51	2074	134	3	37	321	10	156	6.23	48.6	0.53
17756	0.28	5	0.93	5	0.32	6	0.66	6	1	5	0.87	6	9	0.843333	0.51	-0.333333	0.201523	0.636162	1	19339143	19339439	AluSq2	-	S	q2	0	0	9	0.36	0.45	6	0.25	0.44	2167	101	3	14	297	9	156	6.06	52.53	0.46
17759	0.6	6	0.91	6	0.67	6	0.7	5	0.98	6	0.85	5	6	0.843333	0.726667	-0.116667	0.346664	0.723747	1	19341421	19341644	AluJb	+	J	b	15	0.73	8	0.31	0.46	5	0.24	0.41	1049	152	330	5	224	6	114	5.36	50.89	0.41
17783	0.72	3	0.9	4	1	5	0.92	4	0.93	5	1	5	6	0.95	0.873333	-0.0766667	0.604633	0.87318	1	19363406	19363698	AluJo	+	J	o	15	0.93	10	0.29	0.53	7	0.24	0.5	1774	137	0	51	293	6	144	4.1	49.15	0.34
17784	0.75	4	0.94	4	0.85	4	0.87	4	0.5	4	0.78	4	4	0.716667	0.846667	0.13	0.307739	0.723448	1	19366148	19366436	AluJb	+	J	b	15	0.73	6	0.44	0.33	4	0.14	0.47	1894	156	14	7	289	4	144	2.77	49.83	0.22
17802	0.83	3	1	3	0.89	3	0.85	3	0.89	3	0.83	3	10	0.856667	0.906667	0.05	0.322016	0.723448	1	19376940	19377247	AluSx3	-	S	x3	0	0	4	0.16	0.45	11	0.46	0.44	2358	104	0	0	308	10	164	6.49	53.25	0.46
17809	0.73	3	0.67	3	1	4	0.56	4	0.67	3	0.8	5	6	0.676667	0.8	0.123333	0.302434	0.723448	1	19383155	19383440	AluJb	+	J	b	13	0.69	7	0.32	0.42	16	0.46	0.54	1856	147	39	7	286	6	154	4.2	53.85	0.29
17846	1	6	1	5	0.86	7	1	7	0.97	6	0.93	7	8	0.966667	0.953333	-0.0133333	0.911607	0.995096	1	19433993	19434300	AluSx3	+	S	x3	22	0.91	4	0.16	0.46	3	0.26	0.3	1997	159	0	16	308	8	154	5.19	50	0.42
17871	1	3	0.93	5	1	6	1	6	1	3	1	6	10	1	0.976667	-0.0233333	0.35706	0.724797	1	19469336	19469585	AluSz	+	S	z	6	1	2	0.13	0.35	2	0.18	0.34	1700	104	152	0	250	10	133	8	53.2	0.57
17874	1	4	1	3	0.95	4	1	3	0.98	4	0.95	4	4	0.976667	0.983333	0.00666667	0.753607	0.941781	1	19485354	19485650	AluSz	+	S	z	10	0.9	5	0.23	0.42	4	0.26	0.35	1896	162	0	14	297	4	149	2.69	50.17	0.21
17880	1	5	1	5	0.93	5	1	5	1	5	1	5	5	1	0.976667	-0.0233333	0.35706	0.724797	1	19496693	19496890	AluJo	+	J	o	0	0	3	0.2	0.35	1	0.05	0.42	1132	197	0	5	198	5	106	5.05	53.54	0.35
17884	0.75	4	1	4	0.6	5	1	4	0.92	4	1	4	7	0.973333	0.783333	-0.19	0.215073	0.653401	1	19502277	19502580	AluJb	-	J	b	0	0	2	0.12	0.37	2	0.08	0.45	1814	158	36	16	304	7	150	4.61	49.34	0.39
17888	0.89	9	1	9	1	5	0.97	6	0.85	9	0.94	9	9	0.92	0.963333	0.0433333	0.270428	0.717262	1	19507592	19507876	AluJr4	+	J	r4	19	0.89	1	0.06	0.39	0	0	0.36	788	207	151	91	285	9	154	6.32	54.04	0.44
17890	1	4	1	4	1	4	1	3	1	4	0.94	3	8	0.98	1	0.02	0.367384	0.72739	1	19509934	19510234	AluSx	+	S	x	19	0.84	2	0.13	0.35	3	0.12	0.45	2449	83	0	0	301	8	163	5.32	54.15	0.36
17915	1	6	0.9	5	0.92	6	0.93	7	0.89	9	0.9	7	10	0.906667	0.94	0.0333333	0.3363	0.723448	1	19532833	19533129	AluSq2	-	S	q2	0	0	6	0.27	0.42	4	0.23	0.37	2153	81	27	34	297	10	152	6.73	51.18	0.52
17918	0.28	3	0.25	4	0.61	4	0.78	4	0.57	4	0.58	4	4	0.643333	0.38	-0.263333	0.110111	0.512075	1	19537765	19538052	AluJb	-	J	b	0	0	9	0.4	0.42	2	0.13	0.35	1449	177	35	35	288	4	155	2.78	53.82	0.2
17925	0.78	5	0.96	5	1	4	1	4	0.94	4	0.96	4	7	0.966667	0.913333	-0.0533333	0.64396	0.893203	1	19547848	19548147	AluSc8	+	S	c8	18	1	5	0.22	0.43	9	0.29	0.5	2239	107	3	7	300	7	157	4.67	52.33	0.34
17944	0.82	4	0.88	4	0.92	4	0.96	5	1	3	1	4	7	0.986667	0.873333	-0.113333	0.0117212	0.299279	1	19558119	19558415	AluJb	-	J	b	0	0	10	0.31	0.51	10	0.33	0.49	1910	131	3	14	297	7	156	4.71	52.53	0.35
17945	0.71	6	0.73	4	0.83	6	0.71	4	0.79	4	0.81	4	8	0.77	0.756667	-0.0133333	0.879943	0.986276	1	19558474	19558716	AluSx	+	S	x	4	0.5	8	0.27	0.49	2	0.08	0.46	1854	95	0	0	243	8	138	6.58	56.79	0.42
17963	1	3	0.89	3	1	5	0.67	3	0.67	4	1	4	8	0.78	0.963333	0.183333	0.249918	0.694406	1	19572997	19573303	AluSz	+	S	z	30	0.8	13	0.47	0.47	2	0.1	0.41	1970	143	10	0	307	8	146	5.21	47.56	0.46
17973	0.83	3	0.2	8	0.26	8	0.75	8	0.17	8	0.4	5	17	0.44	0.43	-0.01	0.989392	1	1	19578910	19579215	AluSx1	+	S	x1	21	0.81	34	0.73	0.61	15	0.53	0.48	2170	92	0	10	306	17	165	11.11	53.92	0.77
17974	0.86	3	0.85	5	0.56	3	0.5	3	0.82	3	0.94	4	7	0.753333	0.756667	0.00333333	0.862959	0.981435	1	19579216	19579432	AluJb	-	J	b	0	0	26	0.72	0.54	11	0.45	0.46	1565	121	61	50	217	7	118	6.45	54.38	0.46
17988	0.98	6	0.81	8	0.8	5	0.93	8	0.77	7	0.76	7	8	0.82	0.863333	0.0433333	0.527899	0.830292	1	19589014	19589310	AluJr	+	J	r	9	0.89	7	0.19	0.55	5	0.14	0.53	1491	202	3	20	297	8	152	5.39	51.18	0.42
18011	1	4	1	4	1	3	0.83	6	0.93	7	0.8	5	9	0.853333	1	0.146667	0.0014682	0.156477	1	19604018	19604309	AluSz6	-	S	z6	0	0	4	0.29	0.34	4	0.2	0.4	2065	113	3	0	292	9	151	6.16	51.71	0.46
18017	0.33	3	0.71	4	0.46	4	0.75	4	0.67	3	1	4	6	0.806667	0.5	-0.306667	0.127639	0.534705	1	19607520	19607713	AluSg7	-	S	g7	1	1	16	0.56	0.48	3	0.12	0.44	1208	113	0	31	194	6	98	6.19	50.52	0.49
18082	0.95	5	0.93	7	0.92	7	0.97	7	0.96	9	0.98	9	11	0.97	0.933333	-0.0366667	0.081258	0.500778	1	19655469	19655769	AluSz	+	S	z	19	0.84	18	0.34	0.65	11	0.29	0.55	2284	120	0	0	301	11	158	7.31	52.49	0.53
18086	0.67	3	0.94	3	1	3	0.67	4	0.96	3	0.83	6	14	0.82	0.87	0.05	0.500487	0.812134	1	19657509	19657803	AluSx1	-	S	x1	0	0	8	0.18	0.61	10	0.22	0.6	2393	78	7	0	295	14	162	9.49	54.92	0.64
18093	1	5	0.48	5	1	3	0.85	4	0.78	5	0.78	4	9	0.803333	0.826667	0.0233333	0.292155	0.723448	1	19661039	19661335	AluSz6	-	S	z6	0	0	4	0.19	0.41	7	0.17	0.57	2184	114	10	0	297	9	158	6.06	53.2	0.43
18096	0.71	7	0.87	5	0.69	8	0.86	7	1	9	0.95	5	13	0.936667	0.756667	-0.18	0.0637543	0.500778	1	19662571	19662867	AluSx1	+	S	x1	17	0.71	7	0.18	0.56	9	0.24	0.55	2040	138	0	10	297	13	166	8.75	55.89	0.57
18099	1	5	0.83	6	1	8	0.96	8	1	6	0.8	7	11	0.92	0.943333	0.0233333	0.675666	0.908283	1	19664492	19664775	AluSp	+	S	p	11	0.91	11	0.27	0.58	28	0.58	0.63	2184	84	35	0	284	11	159	7.75	55.99	0.5
18115	1	4	0.83	6	1	4	0.83	7	1	4	0.96	8	11	0.93	0.943333	0.0133333	0.705844	0.920617	1	19683356	19683658	AluSx1	-	S	x1	0	0	8	0.21	0.56	5	0.18	0.47	2203	106	0	20	303	11	167	7.26	55.12	0.48
18119	1	3	0.94	3	1	4	1	3	0.95	4	0.93	5	7	0.96	0.98	0.02	0.491103	0.805616	1	19688733	19689013	AluSx1	-	S	x1	0	0	8	0.3	0.46	5	0.16	0.5	1888	125	64	4	281	7	147	4.98	52.31	0.36
18155	0.94	4	0.83	6	1	6	1	3	1	3	1	3	6	1	0.923333	-0.0766667	0.101977	0.503913	1	19719055	19719294	AluJb	+	J	b	14	0.71	10	0.3	0.52	12	0.31	0.55	1460	167	0	21	240	6	122	5	50.83	0.39
18156	1	3	0.83	3	1	4	0.81	3	0.83	4	1	4	8	0.88	0.943333	0.0633333	0.445858	0.778439	1	19720490	19720779	AluSx	-	S	x	0	0	12	0.25	0.61	13	0.47	0.47	2165	97	52	0	290	8	150	5.52	51.72	0.41
18160	0.92	4	0.97	4	0.83	3	1	4	1	5	1	4	7	1	0.906667	-0.0933333	0.0130284	0.31106	1	19725378	19725650	AluSq2	-	S	q2	0	0	9	0.27	0.51	6	0.22	0.47	1946	132	4	4	273	7	145	5.13	53.11	0.37
18163	0.88	3	0.97	3	0.95	5	1	3	1	3	0.86	5	7	0.953333	0.933333	-0.02	0.396783	0.747245	1	19730487	19730752	AluSz	+	S	z	26	1	6	0.18	0.52	12	0.37	0.51	1881	124	4	8	266	7	125	5.26	46.99	0.48
18207	0.83	4	0.92	4	1	4	0.8	3	0.92	4	0.94	4	4	0.886667	0.916667	0.03	0.485412	0.801526	1	19776353	19776667	AluJo	+	J	o	29	0.97	9	0.32	0.48	0	0	0.38	2035	162	0	9	315	4	155	2.54	49.21	0.21
18232	0.87	7	0.66	7	0.81	4	1	6	1	6	0.84	7	8	0.946667	0.78	-0.166667	0.0589031	0.492688	1	19796495	19796733	AluJb	+	J	b	20	0.9	9	0.27	0.51	3	0.12	0.45	1550	155	4	0	239	8	122	6.69	51.05	0.52
18259	0.88	7	1	3	0.62	5	0.93	5	0.83	6	0.7	6	8	0.82	0.833333	0.0133333	0.579775	0.859637	1	19814741	19815056	AluJo	-	J	o	0	0	1	0.05	0.43	4	0.17	0.43	1972	123	22	51	316	8	175	5.06	55.38	0.34
18261	0.83	3	0.7	5	1	6	0.67	3	0.94	3	1	3	13	0.87	0.843333	-0.0266667	0.817919	0.966295	1	19815874	19816182	AluY	-	Y	None	0	0	8	0.25	0.51	1	0.04	0.44	2566	58	0	10	309	13	165	8.41	53.4	0.6
18263	1	3	1	3	0.7	3	1	3	1	3	1	3	3	1	0.9	-0.1	0.312698	0.723448	1	19816982	19817250	AluJo	+	J	o	0	0	2	0.1	0.41	4	0.23	0.4	1615	167	34	4	269	3	139	2.23	51.67	0.17
18280	0.45	6	0.71	7	0.43	7	0.62	4	0.58	6	1	3	14	0.733333	0.53	-0.203333	0.247856	0.692152	1	19827311	19827602	AluY	+	Y	None	20	1	7	0.29	0.44	7	0.31	0.43	2250	72	45	17	292	14	152	9.59	52.05	0.71
18304	0.57	3	0.92	4	0.67	3	0.75	4	0.86	3	0.95	4	6	0.853333	0.72	-0.133333	0.357207	0.725009	1	19839708	19840004	AluJb	-	J	b	0	0	5	0.2	0.45	12	0.45	0.47	2003	141	30	0	297	6	145	4.04	48.82	0.34
18325	1	3	1	3	0.57	3	1	3	0.92	3	0.82	3	3	0.913333	0.856667	-0.0566667	0.845572	0.977107	1	19850702	19851024	AluJr	-	J	r	0	0	10	0.39	0.45	4	0.16	0.45	1734	176	0	40	323	3	145	1.86	44.89	0.19
18345	1	4	0.82	4	0.57	3	1	4	0.82	4	0.91	4	4	0.91	0.796667	-0.113333	0.646515	0.894414	1	19862691	19862999	AluJb	+	J	b	25	1	2	0.09	0.44	8	0.55	0.34	1853	165	10	16	309	4	149	2.59	48.22	0.22
18363	0.8	5	1	3	0.6	6	0.73	5	0.79	4	0.63	3	7	0.716667	0.8	0.0833333	0.350078	0.72409	1	19878562	19878834	AluSx1	+	S	x1	4	1	2	0.07	0.47	5	0.19	0.5	2013	95	51	0	273	7	149	5.13	54.58	0.35
18368	0.74	5	0.9	4	0.55	5	0.85	5	0.93	5	0.71	5	6	0.83	0.73	-0.1	0.452937	0.780407	1	19881363	19881650	AluJo	+	J	o	6	0.83	5	0.18	0.47	1	0.08	0.31	1574	177	14	35	288	6	147	4.17	51.04	0.32
18379	0.63	5	1	5	0.82	5	1	5	0.93	5	0.89	5	5	0.94	0.816667	-0.123333	0.522591	0.827144	1	19887179	19887477	AluSx1	+	S	x1	18	1	14	0.5	0.48	14	0.55	0.45	2086	137	3	0	299	5	149	3.34	49.83	0.27
18392	0.87	5	1	4	0.7	5	1	3	0.83	3	0.7	5	5	0.843333	0.856667	0.0133333	0.943347	1	1	19894165	19894455	AluJb	+	J	b	3	1	4	0.24	0.38	6	0.25	0.44	1765	144	14	34	291	5	161	3.44	55.33	0.23
18394	1	4	0.78	6	0.4	4	0.8	5	0.46	4	1	4	8	0.753333	0.726667	-0.0266667	0.947646	1	1	19894700	19894993	AluSq	-	S	q	0	0	5	0.19	0.46	3	0.12	0.45	2266	88	7	3	294	8	156	5.44	53.06	0.39
18419	0.83	3	0.83	3	1	3	0.95	3	0.92	3	0.93	3	3	0.933333	0.886667	-0.0466667	0.943641	1	1	19909880	19910047	FAM	-	FAM	None	0	0	6	0.21	0.48	7	0.23	0.49	939	202	0	12	168	3	79	3.57	47.02	0.32
18436	0.6	5	1	4	1	4	0.93	5	0.83	3	1	4	5	0.92	0.866667	-0.0533333	0.856608	0.978564	1	19917428	19917702	AluJb	-	J	b	0	0	5	0.19	0.46	3	0.13	0.43	1380	153	113	18	275	5	133	3.64	48.36	0.31
18448	0.85	4	0.95	4	0.75	4	1	4	1	4	1	4	4	1	0.85	-0.15	0.00448908	0.218499	1	19922448	19922523	FLAM_A	-	FLAM_A	None	0	0	5	0.21	0.44	5	0.26	0.42	548	145	0	0	76	4	44	10.53	57.89	0.7
18472	0.5	4	0.81	4	0.85	4	1	4	0.9	4	1	4	8	0.966667	0.72	-0.246667	0.0250234	0.384507	1	19938184	19938479	AluSz	+	S	z	15	1	4	0.22	0.39	10	0.4	0.45	2349	98	3	0	296	8	153	5.41	51.69	0.41
18532	0.65	6	0.57	6	0.69	9	0.62	8	0.71	7	0.79	9	12	0.706667	0.636667	-0.07	0.45264	0.780407	1	19980621	19980917	AluJb	+	J	b	22	0.82	12	0.33	0.54	6	0.23	0.46	1971	135	30	7	297	12	166	8.08	55.89	0.52
18541	0.1	3	0.04	4	0.06	4	0.33	4	0.31	4	0.19	4	4	0.276667	0.0666667	-0.21	0.0115638	0.298361	1	19988085	19988383	AluJr4	+	J	r4	16	0.94	17	0.55	0.5	6	0.32	0.39	1927	154	7	10	299	4	150	2.68	50.17	0.22
18542	0.07	3	0.03	4	0.08	4	0.08	3	0	4	0.17	3	4	0.0833333	0.06	-0.0233333	0.966068	1	1	19988541	19988736	AluJr	-	J	r	3	1	7	0.27	0.46	3	0.13	0.42	918	174	51	66	196	4	86	4.08	43.88	0.43
18552	1	3	0.53	3	0.56	3	0.9	3	1	3	1	3	3	0.966667	0.696667	-0.27	0.201385	0.636049	1	19995096	19995206	FLAM_A	-	FLAM_A	None	0	0	5	0.16	0.5	8	0.33	0.44	593	180	171	0	111	3	60	5.41	54.05	0.38
18578	1	5	0.9	5	1	6	0.89	5	0.83	6	1	6	9	0.906667	0.966667	0.06	0.386894	0.73924	1	20012200	20012519	AluY	-	Y	None	0	0	7	0.24	0.49	7	0.26	0.46	2394	78	0	44	320	9	165	5.63	51.56	0.43
18630	0.8	5	0.9	5	1	5	1	4	1	4	1	5	5	1	0.9	-0.1	0.0858319	0.500778	1	20041454	20041732	AluJr	+	J	r	8	0.88	10	0.39	0.45	6	0.24	0.45	1442	179	57	18	279	5	154	3.58	55.2	0.24
18635	1	4	1	4	1	5	1	4	1	4	1	3	8	1	1	0	1	1	1	20043399	20043691	AluSq2	+	S	q2	12	0.83	10	0.29	0.52	7	0.2	0.53	2226	99	7	0	293	8	157	5.46	53.58	0.38
18660	1	4	0.92	6	0.79	4	1	5	0.9	5	0.94	6	7	0.946667	0.903333	-0.0433333	0.730287	0.931334	1	20055647	20055940	AluSz6	-	S	z6	0	0	5	0.17	0.49	4	0.19	0.41	2241	102	7	0	294	7	155	4.76	52.72	0.34
18666	1	4	1	5	0.92	6	0.83	6	1	4	0.67	3	10	0.833333	0.973333	0.14	0.250353	0.694929	1	20059477	20059770	AluSx1	+	S	x1	11	1	6	0.25	0.44	5	0.16	0.5	2141	95	0	3	294	10	160	6.8	54.42	0.47
18688	0.88	4	0.97	5	1	4	1	3	1	4	1	3	5	1	0.95	-0.05	0.144709	0.558844	1	20077809	20078098	AluJb	+	J	b	0	0	3	0.11	0.47	15	0.55	0.47	1719	148	3	31	290	5	162	3.45	55.86	0.23
18708	1	6	1	5	1	8	1	4	0.95	5	0.62	6	9	0.856667	1	0.143333	0.130148	0.538368	1	20089562	20089870	AluSx1	-	S	x1	0	0	8	0.25	0.51	4	0.14	0.47	2120	110	3	10	309	9	161	5.83	52.1	0.43
18723	1	7	0.96	7	1	7	1	7	0.96	7	0.96	9	11	0.973333	0.986667	0.0133333	0.506445	0.815813	1	20099402	20099708	AluSx	+	S	x	27	0.81	5	0.12	0.58	7	0.18	0.57	2044	134	3	0	307	11	160	7.17	52.12	0.53
18728	1	3	0.89	3	1	3	1	3	1	3	1	4	7	1	0.963333	-0.0366667	0.335911	0.723448	1	20101553	20101869	AluSq2	-	S	q2	0	0	6	0.21	0.48	3	0.13	0.44	1997	94	3	44	317	7	165	4.42	52.05	0.33
18730	1	3	1	3	1	4	1	4	1	5	0.67	3	8	0.89	1	0.11	0.311311	0.723448	1	20102395	20102700	AluSz	-	S	z	0	0	3	0.13	0.43	7	0.27	0.46	2037	124	26	7	306	8	148	5.23	48.37	0.46
18732	1	4	1	4	1	5	1	4	0.75	4	0.67	4	6	0.806667	1	0.193333	0.073437	0.500778	1	20103841	20104139	AluSz6	-	S	z6	0	0	8	0.25	0.5	0	0	0.45	1964	137	3	3	299	6	146	4.01	48.83	0.34
18738	1	4	1	4	0.92	4	1	4	1	4	1	5	5	1	0.973333	-0.0266667	0.349605	0.723747	1	20107569	20107662	AluSx	+	S	x	25	0.96	7	0.25	0.47	4	0.19	0.41	675	75	0	21	94	5	44	10.64	46.81	0.98
18749	0.86	7	0.85	7	0.81	7	0.86	7	0.83	6	0.86	7	7	0.85	0.84	-0.01	0.846741	0.977125	1	20112470	20112782	AluJo	+	J	o	32	0.75	2	0.07	0.5	9	0.33	0.48	1552	144	64	67	313	7	157	4.47	50.16	0.36
18766	0.5	5	1	4	1	4	1	3	0.98	7	0.67	6	14	0.883333	0.833333	-0.05	0.99927	1	1	20127155	20127459	AluSx	-	S	x	0	0	21	0.6	0.53	8	0.22	0.54	2441	79	0	3	305	14	162	9.18	53.11	0.66
18770	0.8	5	0.94	6	0.95	7	0.89	6	1	6	1	5	8	0.963333	0.896667	-0.0666667	0.174329	0.601488	1	20129151	20129411	AluJb	+	J	b	12	0.75	10	0.32	0.51	3	0.16	0.38	1476	126	134	15	261	8	140	6.13	53.64	0.43
18790	0.83	6	1	3	1	7	0.67	4	1	4	0.97	6	8	0.88	0.943333	0.0633333	0.642428	0.89267	1	20144582	20144848	AluSx	-	S	x	0	0	2	0.1	0.4	2	0.09	0.43	1795	124	94	8	267	8	143	5.99	53.56	0.42
18792	0.93	5	1	5	1	5	1	4	0.95	5	1	5	8	0.983333	0.976667	-0.00666667	0.889052	0.98889	1	20145288	20145597	AluJb	+	J	b	32	0.75	3	0.13	0.43	5	0.26	0.4	2004	155	3	0	310	8	160	5.16	51.61	0.39
18817	0.94	4	0.85	4	1	3	1	3	1	4	0.78	3	6	0.926667	0.93	0.00333333	0.725445	0.930552	1	20166239	20166542	AluJb	+	J	b	24	0.83	1	0.07	0.33	1	0.07	0.33	1808	164	7	20	304	6	151	3.95	49.67	0.32
18818	0.5	3	1	6	1	4	0.36	3	0.8	5	0.62	8	10	0.593333	0.833333	0.24	0.122778	0.527364	1	20167794	20168111	AluSz6	+	S	z6	0	0	6	0.38	0.38	6	0.25	0.44	2066	124	0	3	318	10	158	6.29	49.69	0.51
18822	1	4	0.92	4	0.94	3	0.95	4	0.83	4	1	5	8	0.926667	0.953333	0.0266667	0.833138	0.97172	1	20170120	20170418	AluSz	-	S	z	0	0	3	0.16	0.39	8	0.33	0.44	2132	127	0	3	299	8	156	5.35	52.17	0.4
18861	1	7	0.94	8	1	6	0.83	6	0.89	3	1	5	11	0.906667	0.98	0.0733333	0.277381	0.723448	1	20198158	20198466	AluSx1	-	S	x1	0	0	7	0.42	0.37	8	0.31	0.46	2319	107	0	0	309	11	153	7.12	49.51	0.59
18872	0.46	6	0.88	8	0.97	9	0.81	8	0.84	8	0.87	9	9	0.84	0.77	-0.07	0.922033	0.998114	1	20204124	20204401	AluJb	+	J	b	22	0.86	11	0.43	0.46	12	0.44	0.47	1577	137	108	14	278	9	150	6.47	53.96	0.46
18873	0.67	3	0.69	4	1	4	0.7	5	0.88	5	0.88	4	7	0.82	0.786667	-0.0333333	0.736103	0.934804	1	20205565	20205902	AluSx	+	S	x	32	0.84	13	0.58	0.42	3	0.12	0.46	1836	124	0	78	338	7	163	4.14	48.22	0.36
18888	1	4	0.98	4	1	4	1	3	1	3	1	3	5	1	0.993333	-0.00666667	0.573798	0.856284	1	20225307	20225602	AluJb	-	J	b	0	0	10	0.45	0.42	1	0.07	0.35	1772	196	0	0	296	5	149	3.38	50.34	0.27
18891	0.63	6	1	11	0.79	7	1	8	1	3	0.82	11	18	0.94	0.806667	-0.133333	0.361253	0.72739	1	20228707	20228997	AluY	-	Y	None	0	0	3	0.19	0.36	1	0.09	0.3	2401	72	0	3	291	18	172	12.37	59.11	0.72
18902	0.5	3	1	6	0.75	4	0.67	3	1	4	0.94	3	22	0.87	0.75	-0.12	0.63492	0.888352	1	20245966	20246277	AluY	+	Y	None	30	0.93	6	0.2	0.49	2	0.08	0.46	2684	45	0	3	312	22	173	14.1	55.45	0.92
18920	1	3	0.89	3	0.72	3	1	3	0.93	5	0.72	3	9	0.883333	0.87	-0.0133333	0.906033	0.994536	1	20276853	20277149	AluSq2	-	S	q2	0	0	5	0.16	0.51	9	0.32	0.48	2187	108	0	17	297	9	155	6.06	52.19	0.45
18925	1	3	0.88	4	0.91	4	0.75	3	0.89	4	0.81	4	9	0.816667	0.93	0.113333	0.138182	0.551932	1	20287556	20287865	AluY	+	Y	None	30	0.77	6	0.22	0.49	6	0.18	0.51	2312	110	3	0	310	9	159	5.81	51.29	0.45
18944	0.79	4	0.78	6	0.72	6	1	5	0.95	5	0.85	6	6	0.933333	0.763333	-0.17	0.056681	0.487251	1	20337710	20337881	AluSc	+	S	c	0	0	8	0.31	0.45	4	0.18	0.42	1282	128	0	0	172	6	94	6.98	54.65	0.47
18945	1	3	0.5	3	0.5	3	0.66	5	0.89	3	1	3	6	0.85	0.666667	-0.183333	0.605676	0.87384	1	20343666	20343951	AluSz	-	S	z	0	0	2	0.19	0.29	1	0.09	0.31	2044	133	14	0	286	6	143	4.2	50	0.34
18970	0.82	9	0.93	3	1	4	1	4	1	7	0.97	10	13	0.99	0.916667	-0.0733333	0.198065	0.63202	1	20394330	20394634	AluSq2	+	S	q2	23	0.87	7	0.3	0.44	5	0.27	0.39	2315	102	3	0	305	13	160	8.52	52.46	0.62
18993	1	7	0.83	6	1	5	0.9	5	0.95	5	0.89	3	9	0.913333	0.943333	0.03	0.265597	0.712243	1	20414569	20414866	AluSp	+	S	p	13	1	4	0.18	0.43	2	0.11	0.38	2348	91	3	10	298	9	157	6.04	52.68	0.44
19000	0.88	4	0.69	4	0.88	4	0.92	4	0.93	3	0.93	4	4	0.926667	0.816667	-0.11	0.102265	0.50456	1	20420223	20420469	AluJr	-	J	r	0	0	5	0.16	0.51	3	0.11	0.48	1591	158	12	4	247	4	124	3.24	50.2	0.27
19018	1	4	0.7	5	0.97	5	0.93	5	1	5	0.88	5	5	0.936667	0.89	-0.0466667	0.946587	1	1	20437981	20438265	AluJb	+	J	b	21	0.81	11	0.46	0.44	4	0.19	0.41	1853	151	42	0	285	5	152	3.51	53.33	0.25
19033	1	6	0.64	4	0.38	4	0.67	6	0.97	4	1	5	9	0.88	0.67	-0.21	0.452915	0.780407	1	20446836	20447124	AluSg7	+	S	g7	11	0.91	5	0.23	0.43	4	0.16	0.44	2242	93	3	0	289	9	159	6.23	55.02	0.42
19040	0.75	4	0.7	4	0.46	4	0.81	4	0.79	4	0.87	3	4	0.823333	0.636667	-0.186667	0.104273	0.506562	1	20450397	20450569	AluJb	+	J	b	10	0.9	10	0.34	0.49	2	0.08	0.44	1682	154	0	79	173	4	87	4.62	50.29	0.37
19065	0.29	6	0.73	7	0.62	7	0.75	5	0.35	5	0.23	9	12	0.443333	0.546667	0.103333	0.620386	0.880258	1	20471289	20471601	AluSz	+	S	z	28	0.79	10	0.24	0.58	4	0.2	0.4	2204	125	0	10	313	12	163	7.67	52.08	0.58
19093	1	3	0.94	3	0.95	3	0.89	3	1	4	1	3	13	0.963333	0.963333	-1.11022e-16	0.737908	0.935467	1	20502396	20502711	AluSq2	-	S	q2	0	0	6	0.3	0.4	9	0.36	0.45	2419	82	0	29	316	13	168	8.23	53.16	0.59
19134	0.86	7	1	5	0.71	7	0.83	4	1	5	0.9	5	15	0.91	0.856667	-0.0533333	0.790694	0.956661	1	20547380	20547673	AluSq10	+	S	q10	11	1	6	0.31	0.4	4	0.15	0.47	2575	51	0	0	294	15	165	10.2	56.12	0.65
19144	1	3	0.89	3	0.75	3	0.33	3	0.89	3	0.5	3	5	0.573333	0.88	0.306667	0.129525	0.537728	1	20557684	20557983	AluSx1	-	S	x1	0	0	7	0.28	0.45	2	0.14	0.34	2128	143	0	0	300	5	154	3.33	51.33	0.25
19205	1	4	1	5	0.79	6	1	3	1	4	1	6	11	1	0.93	-0.07	0.318785	0.723448	1	20625885	20626196	AluSx1	-	S	x1	0	0	5	0.17	0.49	5	0.13	0.55	2170	147	0	0	312	11	164	7.05	52.56	0.51
19226	0.78	6	1	6	0.73	6	1	4	0.86	7	1	4	9	0.953333	0.836667	-0.116667	0.337446	0.723448	1	20643410	20643672	AluY	+	Y	None	24	1	10	0.37	0.47	15	0.33	0.6	2091	84	4	0	263	9	136	6.84	51.71	0.52
19237	0.86	6	0.6	4	0.82	7	1	5	1	5	0.97	6	11	0.99	0.76	-0.23	0.00317181	0.194779	1	20652983	20653241	AluSg	-	S	g	0	0	2	0.09	0.43	1	0.05	0.4	1910	100	58	0	259	11	145	8.49	55.98	0.55
19281	0.53	3	0.29	6	0.12	5	0.56	6	0.46	6	0.26	6	8	0.426667	0.313333	-0.113333	0.428337	0.765982	1	20694352	20694533	AluSc8	-	S	c8	0	0	12	0.31	0.58	10	0.34	0.49	1343	121	0	0	182	8	101	8.79	55.49	0.57
19309	0.69	4	0.39	6	0.92	4	1	6	1	5	1	3	10	1	0.666667	-0.333333	0.00463564	0.22024	1	20723639	20723967	AluSz	+	S	z	19	1	2	0.07	0.49	5	0.14	0.54	2175	100	0	82	329	10	162	6.08	49.24	0.5
19351	1	6	0.88	6	0.65	4	0.79	7	0.77	7	0.83	6	10	0.796667	0.843333	0.0466667	0.372477	0.732136	1	20758472	20758775	AluSx	-	S	x	0	0	8	0.26	0.49	4	0.13	0.5	2139	128	16	0	304	10	155	6.58	50.99	0.51
19433	0.81	6	0.96	4	1	5	0.88	4	0.73	6	0.81	6	9	0.806667	0.923333	0.116667	0.126473	0.532758	1	20823548	20823835	AluSq	+	S	q	10	0.8	7	0.24	0.48	6	0.24	0.45	2096	115	14	0	288	9	156	6.25	54.17	0.43
19446	0.95	10	0.93	10	0.93	10	1	9	1	12	0.95	9	14	0.983333	0.936667	-0.0466667	0.0677288	0.500778	1	20833438	20833732	AluSx	+	S	x	23	0.87	9	0.39	0.43	14	0.57	0.44	2005	108	48	10	295	14	163	9.49	55.25	0.62
19482	0.88	4	0.68	4	0.2	5	0.85	5	0.92	5	0.56	3	6	0.776667	0.586667	-0.19	0.380026	0.735821	1	20858884	20859186	AluJo	+	J	o	19	0.74	5	0.16	0.51	6	0.19	0.51	1900	172	0	13	303	6	156	3.96	51.49	0.3
19497	1	4	0.96	7	0.55	5	0.83	6	0.96	3	0.81	8	11	0.866667	0.836667	-0.03	0.658082	0.899652	1	20871431	20871725	AluSq2	-	S	q2	0	0	5	0.29	0.37	3	0.2	0.35	2338	81	0	7	295	11	158	7.46	53.56	0.52
19543	1	8	0.8	5	1	5	1	4	0.9	5	0.58	6	14	0.826667	0.933333	0.106667	0.457124	0.781132	1	20904066	20904353	AluYc	-	Y	c	0	0	5	0.23	0.42	4	0.13	0.49	2385	69	3	0	288	14	161	9.72	55.9	0.64
19547	1	3	0.67	3	1	3	0.62	4	0.8	5	0.89	3	6	0.77	0.89	0.12	0.163322	0.586024	1	20906709	20907017	AluSx	+	S	x	23	1	10	0.4	0.45	8	0.45	0.38	2177	139	0	13	309	6	149	3.88	48.22	0.33
19571	0.5	4	1	5	0.93	5	0.93	3	1	4	0.93	3	5	0.953333	0.81	-0.143333	0.540414	0.837778	1	20920062	20920367	AluJr	-	J	r	0	0	6	0.2	0.49	6	0.17	0.53	1928	176	7	3	306	5	152	3.27	49.67	0.27
19577	0.63	7	0.9	4	0.81	4	0.88	4	1	4	1	4	10	0.96	0.78	-0.18	0.0474125	0.460742	1	20923660	20923948	AluY	+	Y	None	15	0.87	5	0.18	0.48	3	0.15	0.4	2210	90	31	7	289	10	153	6.92	52.94	0.5
19599	0.52	4	0.1	4	0.15	4	0.64	4	0.57	4	0.19	4	14	0.466667	0.256667	-0.21	0.264314	0.710599	1	20939173	20939455	AluSg	+	S	g	20	1	9	0.33	0.51	10	0.32	0.5	2254	71	60	0	283	14	153	9.89	54.06	0.69
19615	0.5	4	0.78	3	0.33	3	0.7	5	1	3	0.83	6	10	0.843333	0.536667	-0.306667	0.115113	0.519853	1	20947058	20947365	AluSg4	-	S	g4	0	0	1	0.03	0.54	4	0.16	0.45	2160	107	0	0	308	10	162	6.49	52.6	0.47
19661	1	7	1	8	0.67	8	0.86	7	0.82	7	0.75	4	11	0.81	0.89	0.08	0.176748	0.605627	1	20989439	20989735	AluSx1	+	S	x1	17	0.82	10	0.32	0.55	3	0.09	0.53	2148	94	20	14	297	11	162	7.41	54.55	0.5
19678	0.93	5	0.97	5	0.95	4	0.97	5	0.89	5	0.97	5	9	0.943333	0.95	0.00666667	0.983941	1	1	21000027	21000321	AluSx	-	S	x	0	0	5	0.2	0.45	7	0.27	0.46	2098	115	17	3	295	9	150	6.1	50.85	0.47
19686	0.7	5	0.92	3	1	4	0.8	5	0.92	4	0.67	3	9	0.796667	0.873333	0.0766667	0.345467	0.723747	1	21004065	21004363	AluSx	+	S	x	15	0.8	4	0.17	0.44	5	0.22	0.43	2249	107	0	7	299	9	164	6.02	54.85	0.4
19692	0.67	3	0.33	3	0.81	7	0.95	7	0.92	6	1	5	9	0.956667	0.603333	-0.353333	0.0178103	0.343544	1	21007675	21007984	AluSz	-	S	z	0	0	8	0.36	0.43	8	0.22	0.54	2144	91	3	11	310	9	165	5.81	53.23	0.41
19711	1	4	0.88	4	0.98	6	1	6	1	5	1	5	6	1	0.953333	-0.0466667	0.195443	0.629264	1	21018835	21019092	AluSg	-	S	g	0	0	1	0.03	0.52	5	0.18	0.48	1327	155	182	35	258	6	132	4.65	51.16	0.36
19713	0.88	5	0.94	4	0.9	5	1	6	0.83	3	0.92	4	8	0.916667	0.906667	-0.01	0.541253	0.838438	1	21019738	21020058	AluJr	-	J	r	0	0	6	0.19	0.5	2	0.06	0.51	1877	134	3	68	321	8	174	4.98	54.21	0.36
19720	0.8	5	0.81	5	0.95	5	0.93	5	0.83	6	0.97	4	6	0.91	0.853333	-0.0566667	0.425704	0.763895	1	21025439	21025741	AluJo	-	J	o	0	0	8	0.29	0.47	13	0.39	0.53	2003	165	3	0	303	6	155	3.96	51.16	0.3
19722	0.94	7	0.94	9	0.95	7	1	5	0.98	7	0.79	7	12	0.923333	0.943333	0.02	0.639682	0.891116	1	21026556	21026863	AluSz	-	S	z	0	0	13	0.35	0.58	10	0.31	0.51	2099	99	7	7	308	12	161	7.79	52.27	0.58
19750	0.95	7	0.86	8	0.79	8	0.96	5	0.93	9	0.88	8	11	0.923333	0.866667	-0.0566667	0.397296	0.747672	1	21043551	21043757	AluSx1	+	S	x1	0	0	7	0.2	0.54	51	0.81	0.71	1667	58	53	0	207	11	122	10.63	58.94	0.62
19751	0.9	5	0.64	7	0.46	7	0.39	6	0.73	7	0.35	6	10	0.49	0.666667	0.176667	0.317961	0.723448	1	21045002	21045281	AluSq2	+	S	q2	29	0.72	43	0.8	0.66	10	0.32	0.5	2003	96	100	4	280	10	153	7.14	54.64	0.48
19752	0.61	3	0.44	3	0.72	3	0.6	3	0.88	4	0.8	5	5	0.76	0.59	-0.17	0.197305	0.631095	1	21045558	21045802	AluJo	-	J	o	0	0	11	0.34	0.51	11	0.39	0.48	1348	147	196	8	245	5	126	4.08	51.43	0.32
19768	0.67	3	0.8	5	0.67	3	0.9	5	1	5	0.57	5	7	0.823333	0.713333	-0.11	0.262141	0.708411	1	21061587	21061853	AluSz	-	S	z	0	0	17	0.61	0.47	6	0.26	0.43	1782	131	63	0	267	7	149	5.24	55.81	0.34
19775	0.53	5	0.6	5	0.8	5	0.5	4	0.6	5	0.83	6	6	0.643333	0.643333	0	0.967699	1	1	21067032	21067331	AluJr	+	J	r	22	0.77	5	0.3	0.37	3	0.19	0.35	1581	200	23	10	300	6	152	4	50.67	0.31
19776	0.97	4	0.71	6	0.93	6	0.67	7	0.93	7	0.89	6	10	0.83	0.87	0.04	0.573532	0.856284	1	21069875	21070183	AluSc8	+	S	c8	30	0.8	0	0	0.31	11	0.4	0.47	2115	126	10	3	309	10	153	6.47	49.51	0.54
19783	1	12	0.94	8	0.98	11	0.7	10	0.88	13	1	9	14	0.86	0.973333	0.113333	0.300739	0.723448	1	21074958	21075268	AluY	+	Y	None	13	1	0	0	0.35	1	0.09	0.3	2149	84	0	58	311	14	170	9	54.66	0.61
19794	0.8	5	0.77	5	1	6	1	4	1	5	0.9	5	8	0.966667	0.856667	-0.11	0.29723	0.723448	1	21083202	21083500	AluSx	-	S	x	0	0	4	0.24	0.37	4	0.21	0.4	1976	141	30	10	299	8	160	5.35	53.51	0.38
19799	0.75	6	1	4	1	4	1	4	1	4	1	4	7	1	0.916667	-0.0833333	0.315609	0.723448	1	21085139	21085444	AluJb	-	J	b	0	0	12	0.49	0.45	9	0.37	0.45	1852	160	3	26	306	7	152	4.58	49.67	0.37
19802	1	4	1	4	1	3	0.95	4	1	4	1	4	4	0.983333	1	0.0166667	0.382679	0.735821	1	21086752	21087047	AluJr	+	J	r	12	1	9	0.3	0.49	8	0.35	0.44	1642	209	3	10	296	4	147	2.7	49.66	0.22
19808	1	5	1	5	1	5	1	5	1	5	1	3	6	1	1	0	1	1	1	21091208	21091379	AluSq2	+	S	q2	11	1	5	0.3	0.37	10	0.41	0.44	1107	163	6	0	172	6	86	6.98	50	0.56
19809	1	3	1	5	1	6	1	6	1	5	0.75	8	10	0.916667	1	0.0833333	0.315609	0.723448	1	21091380	21091690	AluSq	+	S	q	30	0.93	10	0.43	0.43	2	0.14	0.34	2230	125	6	0	311	10	160	6.43	51.45	0.49
19837	0.72	5	0.57	5	0.17	4	0.8	5	0.6	5	0.83	3	6	0.743333	0.486667	-0.256667	0.173571	0.600805	1	21111436	21111703	AluJb	-	J	b	0	0	20	0.75	0.46	5	0.39	0.32	1625	146	86	8	268	6	142	4.48	52.99	0.32
19838	0.65	7	0.84	8	0.91	8	0.88	8	0.96	7	1	4	8	0.946667	0.8	-0.146667	0.0911988	0.500778	1	21115030	21115310	AluJr	+	J	r	4	1	9	0.47	0.41	17	0.51	0.52	1635	139	43	25	281	8	155	5.69	55.16	0.38
19840	0.97	6	1	6	0.92	4	0.89	6	1	6	1	7	14	0.963333	0.963333	0	0.798458	0.959186	1	21115463	21115756	AluSc8	+	S	c8	22	0.86	9	0.29	0.5	16	0.45	0.54	2309	75	20	7	294	14	157	9.52	53.4	0.68
19841	0.77	5	0.93	5	0.67	5	0.68	5	0.89	5	0.73	5	5	0.766667	0.79	0.0233333	0.758784	0.944468	1	21115757	21115900	AluJb	+	J	b	5	1	16	0.49	0.51	13	0.37	0.53	1319	183	35	45	144	5	80	6.94	55.56	0.48
19847	0.67	4	0.89	4	0.87	5	0.92	5	0.92	5	0.96	5	5	0.933333	0.81	-0.123333	0.0895083	0.500778	1	21118502	21118769	AluJo	-	J	o	0	0	11	0.42	0.46	0	0	0.44	1601	164	63	4	268	5	139	3.73	51.87	0.28
19853	1	6	1	7	0.94	6	0.79	8	1	3	0.9	10	14	0.896667	0.98	0.0833333	0.273132	0.72031	1	21121798	21122089	AluSc	-	S	c	0	0	10	0.45	0.42	3	0.14	0.42	2357	75	0	3	292	14	163	9.59	55.82	0.62
19854	0.87	5	0.8	5	0.9	5	1	4	1	5	0.95	5	11	0.983333	0.856667	-0.126667	0.0133132	0.31373	1	21122364	21122670	AluSc8	-	S	c8	0	0	9	0.36	0.45	5	0.24	0.41	2368	71	0	0	307	11	163	7.17	53.09	0.51
19858	1	5	1	5	0.94	5	0.91	5	0.97	5	1	3	5	0.96	0.98	0.02	0.562843	0.851643	1	21123948	21124213	AluJb	+	J	b	21	0.81	9	0.34	0.46	5	0.23	0.41	1401	165	139	0	266	5	135	3.76	50.75	0.29
19882	1	4	1	3	0.94	4	0.88	4	1	4	1	4	4	0.96	0.98	0.02	0.804168	0.961232	1	21144175	21144466	AluJb	-	J	b	0	0	7	0.47	0.34	6	0.3	0.4	1779	151	45	3	292	4	148	2.74	50.68	0.22
19900	1	3	1	3	1	3	1	3	1	3	1	3	3	1	1	0	1	1	1	21162742	21163039	AluJr	-	J	r	0	0	1	0.04	0.46	3	0.22	0.33	1678	188	7	17	298	3	143	2.01	47.99	0.18
19926	0.88	4	0.67	6	1	3	1	5	1	4	0.92	4	8	0.973333	0.85	-0.123333	0.280133	0.723448	1	21188915	21189205	AluJb	-	J	b	0	0	8	0.43	0.39	2	0.1	0.41	1991	158	10	0	291	8	153	5.5	52.58	0.4
19980	1	4	1	5	1	4	1	5	1	5	1	6	6	1	1	0	1	1	1	21244712	21245000	AluJo	-	J	o	0	0	2	0.17	0.31	2	0.14	0.34	1798	180	7	0	289	6	148	4.15	51.21	0.32
19986	1	5	0.96	6	1	6	1	5	1	5	0.92	6	7	0.973333	0.986667	0.0133333	0.773312	0.948588	1	21251052	21251354	AluSx	-	S	x	0	0	2	0.19	0.29	2	0.17	0.31	2105	122	13	16	303	7	160	4.62	52.81	0.34
19987	1	4	0.84	4	0.88	4	0.89	3	1	3	1	4	4	0.963333	0.906667	-0.0566667	0.405499	0.750069	1	21252048	21252324	AluJr	-	J	r	0	0	3	0.29	0.29	2	0.16	0.32	1707	188	7	0	277	4	142	2.89	51.26	0.22
20000	1	4	0.86	7	0.83	3	1	6	0.8	5	1	8	8	0.933333	0.896667	-0.0366667	0.529602	0.830998	1	21264493	21264787	AluSx	-	S	x	0	0	2	0.2	0.28	3	0.24	0.32	2196	119	7	0	295	8	155	5.42	52.54	0.4
20004	0.86	7	0.79	7	0.92	4	0.92	8	0.86	7	1	7	9	0.926667	0.856667	-0.07	0.248395	0.692809	1	21270726	21271030	AluJo	+	J	o	23	0.74	1	0.07	0.33	3	0.12	0.45	1904	190	0	0	305	9	154	5.9	50.49	0.48
20006	0.94	3	0.88	4	1	4	1	4	1	4	0.94	6	7	0.98	0.94	-0.04	0.381401	0.735821	1	21271962	21272276	AluJb	-	J	b	0	0	0	0	0.28	0	0	0.36	1731	165	3	63	315	7	159	4.44	50.48	0.36
20008	1	4	1	4	1	3	1	3	1	3	0.92	4	6	0.973333	1	0.0266667	0.349605	0.723747	1	21273562	21273862	AluJb	+	J	b	26	0.85	1	0.07	0.35	2	0.16	0.32	1867	183	23	0	301	6	155	3.99	51.5	0.3
20025	1	4	1	4	0.97	8	0.89	3	0.86	7	1	6	10	0.916667	0.99	0.0733333	0.17451	0.601793	1	21294669	21294973	AluSx	-	S	x	0	0	2	0.11	0.38	4	0.33	0.31	2137	121	0	23	305	10	157	6.56	51.48	0.5
20030	1	5	0.85	5	1	4	0.95	4	1	4	1	5	7	0.983333	0.95	-0.0333333	0.70276	0.919257	1	21298845	21299144	AluSx3	+	S	x3	17	0.94	5	0.31	0.37	5	0.31	0.36	2114	127	3	10	300	7	158	4.67	52.67	0.34
20052	1	4	0.8	5	0.97	4	0.9	5	0.8	5	1	4	5	0.9	0.923333	0.0233333	0.736314	0.934972	1	21329475	21329764	AluJr	-	J	r	0	0	3	0.21	0.34	1	0.05	0.39	1577	159	0	59	290	5	136	3.45	46.9	0.32
20062	0.88	4	1	4	0.88	4	1	4	1	4	1	4	7	1	0.92	-0.08	0.0825167	0.500778	1	21336658	21336942	AluSx4	+	S	x4	30	0.93	10	0.39	0.45	1	0.08	0.33	2003	109	95	3	285	7	142	4.91	49.82	0.4
20067	0.67	3	1	4	0.83	6	0.87	4	1	3	0.9	5	9	0.923333	0.833333	-0.09	0.659428	0.900269	1	21343169	21343454	AluSx	+	S	x	0	0	3	0.15	0.39	10	0.47	0.41	2001	108	7	42	286	9	156	6.29	54.55	0.43
20080	1	4	1	4	1	4	1	4	1	4	1	4	4	1	1	0	1	1	1	21355389	21355539	FRAM	-	FRAM	None	0	0	3	0.2	0.35	11	0.32	0.52	587	252	53	20	151	4	77	5.3	50.99	0.41
20086	1	3	1	3	0.5	3	1	3	1	3	1	3	3	1	0.833333	-0.166667	0.306023	0.723448	1	21360299	21360601	AluJr4	+	J	r4	16	0.75	3	0.24	0.32	1	0.09	0.3	1429	185	46	63	303	3	148	1.98	48.84	0.17
20088	0.89	3	1	3	1	3	1	3	1	3	1	3	3	1	0.963333	-0.0366667	0.335911	0.723448	1	21366009	21366176	AluJr	+	J	r	22	0.77	5	0.35	0.34	5	0.29	0.37	672	196	18	42	168	3	81	3.57	48.21	0.31
20090	1	5	0.83	6	1	5	1	4	0.9	5	0.94	6	6	0.946667	0.943333	-0.00333333	0.726196	0.930552	1	21368469	21368770	AluJb	-	J	b	0	0	2	0.15	0.33	3	0.26	0.32	1820	185	30	0	302	6	161	3.97	53.31	0.28
20098	1	4	0.87	4	0.98	5	0.92	4	1	5	0.94	4	6	0.953333	0.95	-0.00333333	0.843049	0.975828	1	21386455	21386742	AluJb	-	J	b	0	0	2	0.15	0.33	4	0.18	0.42	1763	160	21	14	288	6	151	4.17	52.43	0.31
20099	0.96	3	1	3	1	3	1	3	1	3	1	3	3	1	0.986667	-0.0133333	0.407681	0.750069	1	21387123	21387297	FAM	+	FAM	None	25	0.96	4	0.19	0.41	1	0.07	0.34	926	200	57	6	175	3	85	3.43	48.57	0.29
20103	1	4	1	4	0.87	4	1	4	1	4	1	4	4	1	0.956667	-0.0433333	0.330418	0.723448	1	21389545	21389714	AluJb	-	J	b	0	0	8	0.35	0.43	4	0.31	0.34	1038	182	0	12	170	4	83	4.71	48.82	0.42
20114	0.8	5	1	5	1	4	0.83	6	1	5	1	4	10	0.943333	0.933333	-0.01	0.961119	1	1	21398045	21398328	AluSg	+	S	g	30	0.8	3	0.13	0.43	3	0.22	0.33	2054	113	92	0	284	10	152	7.04	53.52	0.5
20138	0.67	3	1	3	0.8	5	0.83	3	0.83	3	0.5	4	5	0.72	0.823333	0.103333	0.359739	0.727066	1	21409843	21410116	AluJb	-	J	b	0	0	12	0.55	0.42	3	0.22	0.36	1326	179	113	44	274	5	140	3.65	51.09	0.29
20158	1	3	0.95	5	0.85	4	1	4	1	4	1	5	7	1	0.933333	-0.0666667	0.109469	0.510982	1	21427779	21428081	AluSq	+	S	q	29	0.86	8	0.45	0.38	3	0.2	0.35	1992	148	36	7	303	7	152	4.62	50.17	0.37
20169	1	4	1	3	1	3	1	3	1	4	1	3	4	1	1	0	1	1	1	21435427	21435717	AluSz6	+	S	z6	9	0.78	10	0.44	0.43	2	0.12	0.36	1887	161	7	7	291	4	147	2.75	50.52	0.22
20171	0.86	7	0.95	5	0.75	7	0.9	7	0.93	5	1	3	8	0.943333	0.853333	-0.09	0.223924	0.663495	1	21436284	21436580	AluSz	-	S	z	0	0	2	0.13	0.36	12	0.56	0.41	2049	152	0	10	297	8	154	5.39	51.85	0.41
20177	0.97	6	0.8	5	0.83	3	0.6	8	0.86	7	0.95	7	15	0.803333	0.866667	0.0633333	0.65818	0.899652	1	21440642	21440921	AluSc	-	S	c	0	0	2	0.09	0.43	4	0.27	0.34	2296	57	61	0	280	15	160	10.71	57.14	0.66
20179	0.48	4	0.67	4	0.75	4	0.47	3	0.75	4	0.83	3	5	0.683333	0.633333	-0.05	0.672502	0.9066	1	21442229	21442514	AluJr4	-	J	r4	0	0	1	0.06	0.36	2	0.17	0.31	1697	175	3	25	286	5	142	3.5	49.65	0.29
20181	1	4	1	5	1	4	0.75	3	1	3	1	3	10	0.916667	1	0.0833333	0.315609	0.723448	1	21444998	21445304	AluSx1	+	S	x1	26	0.88	3	0.2	0.35	0	0	0.32	2395	121	3	0	307	10	162	6.51	52.77	0.47
20188	0.8	5	1	4	0.83	6	0.5	4	1	4	1	5	6	0.833333	0.876667	0.0433333	0.751202	0.940546	1	21449774	21450084	AluSz6	+	S	z6	29	0.93	4	0.26	0.35	3	0.16	0.39	2298	129	6	6	311	6	151	3.86	48.55	0.33
20189	0.62	4	1	4	0.83	6	0.76	5	0.7	5	0.75	6	8	0.736667	0.816667	0.08	0.327944	0.723448	1	21450502	21450794	AluSx1	+	S	x1	16	0.94	1	0.06	0.36	1	0.06	0.37	2343	99	20	3	293	8	158	5.46	53.92	0.38
20208	1	4	1	6	0.93	3	1	6	1	3	1	4	7	1	0.976667	-0.0233333	0.35706	0.724797	1	21460880	21461190	AluSx	+	S	x	29	0.83	3	0.25	0.32	3	0.22	0.33	2256	142	3	3	311	7	154	4.5	49.52	0.37
20220	1	6	1	3	0.98	6	1	5	0.92	6	1	5	6	0.973333	0.993333	0.02	0.534889	0.834251	1	21468140	21468444	AluJr	+	J	r	16	0.94	1	0.07	0.34	3	0.12	0.45	1840	193	0	20	305	6	147	3.93	48.2	0.34
20244	1	6	1	4	0.8	5	1	6	0.97	5	0.8	5	8	0.92	0.933333	0.0133333	0.77935	0.951489	1	21480048	21480357	AluSq2	-	S	q2	0	0	3	0.17	0.38	2	0.13	0.36	2178	115	0	14	310	8	159	5.16	51.29	0.39
20248	1	3	0.96	7	1	6	1	5	0.67	6	0.94	6	7	0.87	0.986667	0.116667	0.242727	0.685744	1	21483286	21483556	AluJb	+	J	b	6	1	1	0.09	0.35	3	0.15	0.42	1781	151	66	4	271	7	148	5.17	54.61	0.35
20258	0.96	4	1	5	1	5	1	4	1	5	1	4	13	1	0.986667	-0.0133333	0.407681	0.750069	1	21488175	21488476	AluSq2	+	S	q2	15	1	11	0.38	0.48	6	0.26	0.43	2535	76	0	13	302	13	161	8.61	53.31	0.61
20263	1	4	1	3	1	5	1	4	1	3	1	4	5	1	1	0	1	1	1	21491075	21491364	AluJb	+	J	b	13	0.77	6	0.37	0.36	2	0.13	0.35	1843	172	21	14	290	5	147	3.45	50.69	0.27
20267	0.7	4	0.75	4	1	4	0.75	4	0.75	4	1	3	4	0.833333	0.816667	-0.0166667	0.956865	1	1	21493881	21493979	AluSx	+	S	x	0	0	6	0.28	0.43	6	0.28	0.42	821	121	0	0	99	4	55	8.08	55.56	0.53
20281	1	3	1	4	1	4	1	4	1	3	1	3	5	1	1	0	1	1	1	21500027	21500198	AluSz6	+	S	z6	18	0.83	15	0.47	0.5	1	0.07	0.35	1208	134	0	0	172	5	86	5.81	50	0.47
20283	1	7	0.95	7	1	6	0.67	6	0.98	8	0.94	4	13	0.863333	0.983333	0.12	0.162374	0.58466	1	21504309	21504599	AluSx1	+	S	x1	16	1	12	0.34	0.54	17	0.61	0.47	2269	82	31	7	291	13	160	8.93	54.98	0.6
20293	1	4	1	6	0.92	6	1	5	0.83	7	1	5	10	0.943333	0.973333	0.03	0.806428	0.961232	1	21508048	21508332	AluSg	+	S	g	6	0.83	4	0.16	0.47	10	0.44	0.43	2153	119	3	0	285	10	154	7.02	54.04	0.48
20295	0.89	4	0.84	4	0.5	4	1	4	0.72	3	1	5	10	0.906667	0.743333	-0.163333	0.138092	0.551932	1	21508450	21508761	AluSp	-	S	p	0	0	11	0.45	0.44	3	0.12	0.45	2432	93	3	3	312	10	159	6.41	50.96	0.51
20334	0.81	3	0.83	3	0.83	3	0.44	3	1	3	0.83	3	3	0.756667	0.823333	0.0666667	0.739537	0.936433	1	21524397	21524522	AluJr4	-	J	r4	0	0	8	0.26	0.5	6	0.3	0.41	790	167	56	0	126	3	64	4.76	50.79	0.37
20344	1	3	0.85	5	0.58	4	1	3	0.8	5	0.9	5	5	0.9	0.81	-0.09	0.72987	0.931075	1	21529803	21530069	AluJo	+	J	o	19	0.74	4	0.14	0.48	7	0.36	0.4	1287	180	150	22	267	5	128	3.75	47.94	0.33
20366	0.71	7	0.83	6	1	7	0.78	8	0.83	6	1	6	10	0.87	0.846667	-0.0233333	0.931665	1	1	21540472	21540762	AluY	-	Y	None	0	0	4	0.15	0.47	6	0.26	0.43	2325	72	55	0	291	10	147	6.87	50.52	0.54
20374	0.86	7	0.92	5	1	6	1	6	1	6	1	3	8	1	0.926667	-0.0733333	0.0893954	0.500778	1	21547006	21547301	AluSz	+	S	z	12	0.92	10	0.26	0.56	8	0.22	0.54	2062	135	3	7	296	8	155	5.41	52.36	0.4
20389	1	5	1	5	1	5	1	3	0.87	5	1	5	5	0.956667	1	0.0433333	0.330418	0.723448	1	21554703	21554855	AluJb	-	J	b	0	0	10	0.25	0.57	6	0.26	0.44	950	189	0	0	153	5	85	6.54	55.56	0.42
20395	1	5	0.98	7	1	6	1	7	0.9	5	0.75	5	9	0.883333	0.993333	0.11	0.129232	0.537339	1	21557374	21557619	AluSp	-	S	p	0	0	8	0.34	0.43	6	0.21	0.48	1919	85	4	4	246	9	138	7.32	56.1	0.47
20397	0.6	5	0.71	7	0.88	7	0.95	7	0.8	7	0.98	7	7	0.91	0.73	-0.18	0.0959242	0.500899	1	21558153	21558406	AluJb	-	J	b	0	0	7	0.24	0.49	3	0.13	0.42	1460	165	165	4	254	7	129	5.51	50.79	0.43
20399	0.88	4	0.95	5	0.87	3	1	6	0.94	6	1	3	10	0.98	0.9	-0.08	0.0523239	0.474525	1	21559167	21559471	AluSz6	-	S	z6	0	0	6	0.21	0.47	9	0.23	0.56	2354	82	0	23	305	10	162	6.56	53.11	0.47
20404	0.97	7	1	7	0.88	8	0.95	11	1	6	0.88	8	18	0.943333	0.95	0.00666667	0.862757	0.981435	1	21562863	21563160	AluSp	+	S	p	18	0.89	14	0.36	0.56	12	0.35	0.53	2318	94	3	0	298	18	164	12.08	55.03	0.8
20424	0.96	9	0.89	10	0.8	7	0.97	10	0.9	10	0.88	9	10	0.916667	0.883333	-0.0333333	0.642848	0.892739	1	21573157	21573446	AluJr	-	J	r	0	0	5	0.23	0.42	9	0.26	0.53	1575	179	28	17	290	10	154	6.9	53.1	0.5
20435	0.5	6	0.96	7	1	5	0.94	6	1	4	0.9	10	17	0.946667	0.82	-0.126667	0.681586	0.909635	1	21577219	21577514	AluY	+	Y	None	15	0.87	5	0.26	0.39	8	0.24	0.52	2394	74	0	0	296	17	172	11.49	58.11	0.69
20440	1	6	0.95	4	1	5	0.8	5	0.81	8	1	10	20	0.87	0.983333	0.113333	0.200857	0.635582	1	21579974	21580276	AluY	+	Y	None	21	0.86	11	0.43	0.45	12	0.42	0.48	2424	69	0	3	303	20	174	13.2	57.43	0.81
20470	1	4	1	4	1	3	1	6	1	5	1	4	9	1	1	0	1	1	1	21602520	21602818	AluSx1	-	S	x1	0	0	10	0.36	0.47	10	0.4	0.45	2303	97	23	3	299	9	149	6.02	49.83	0.49
20471	1	7	0.92	8	1	4	1	8	1	8	0.75	4	12	0.916667	0.973333	0.0566667	0.72761	0.930552	1	21603169	21603510	AluSx	-	S	x	0	0	12	0.46	0.46	6	0.15	0.57	2275	79	0	94	342	12	180	7.02	52.63	0.51
20492	1	3	1	3	1	3	1	3	1	3	0.89	3	5	0.963333	1	0.0366667	0.335911	0.723448	1	21618033	21618330	AluSz	+	S	z	11	0.82	6	0.16	0.55	8	0.28	0.48	2120	124	0	17	298	5	154	3.36	51.68	0.25
20529	0.5	6	0.78	7	0.71	8	0.94	8	0.89	10	0.61	4	22	0.813333	0.663333	-0.15	0.21851	0.657855	1	21636267	21636587	AluY	-	Y	None	0	0	7	0.22	0.51	4	0.13	0.5	2601	34	3	34	321	22	181	13.71	56.39	0.87
20581	0.7	5	1	5	1	5	0.84	8	0.83	6	1	6	15	0.89	0.9	0.01	0.623344	0.881799	1	21663052	21663330	AluY	+	Y	None	0	0	6	0.2	0.49	12	0.4	0.49	2312	57	0	11	279	15	162	10.75	58.06	0.64
20588	0.8	6	0.52	6	0.63	5	0.75	4	0.83	6	0.62	5	7	0.733333	0.65	-0.0833333	0.500585	0.812189	1	21667050	21667338	AluSz	+	S	z	14	0.71	6	0.16	0.55	11	0.33	0.53	1809	118	31	7	289	7	156	4.84	53.98	0.34
20589	0.8	5	0.95	5	0.61	5	0.9	6	0.9	4	0.92	6	6	0.906667	0.786667	-0.12	0.376537	0.735752	1	21668303	21668428	FLAM_C	-	FLAM_C	None	0	0	5	0.17	0.49	4	0.12	0.53	798	143	8	0	126	6	68	9.52	53.97	0.68
20594	1	3	1	3	1	4	0.97	6	1	3	1	5	9	0.99	1	0.01	0.455388	0.780407	1	21674725	21675027	AluSx1	+	S	x1	23	1	4	0.19	0.42	8	0.28	0.49	2066	112	13	7	303	9	152	5.94	50.17	0.47
20606	0.85	6	0.85	5	0.68	7	0.89	7	0.86	7	0.88	6	9	0.876667	0.793333	-0.0833333	0.259173	0.704806	1	21680817	21681122	AluSz	-	S	z	0	0	3	0.11	0.46	1	0.04	0.44	1808	137	3	33	306	9	154	5.88	50.33	0.46
20637	1	3	0.89	3	0.69	3	0.93	3	0.9	3	0.93	3	3	0.92	0.86	-0.06	0.971242	1	1	21696461	21696689	AluJo	+	J	o	0	0	10	0.35	0.49	10	0.31	0.51	1496	127	79	0	229	3	122	2.62	53.28	0.19
20639	0.9	5	0.56	6	0.4	4	0.76	6	0.88	5	0.83	4	8	0.823333	0.62	-0.203333	0.29648	0.723448	1	21696866	21697129	AluSx1	+	S	x1	3	0.67	6	0.21	0.48	8	0.2	0.57	1843	98	8	4	264	8	150	6.06	56.82	0.38
20643	0.92	4	0.73	5	0.67	4	0.69	4	1	6	0.92	3	7	0.87	0.773333	-0.0966667	0.310728	0.723448	1	21699406	21699690	AluJb	+	J	b	2	1	7	0.25	0.48	3	0.14	0.42	1871	133	0	3	285	7	161	4.91	56.49	0.31
20711	0.72	3	1	5	1	5	0.46	6	1	5	0.87	4	8	0.776667	0.906667	0.13	0.464819	0.787005	1	21767920	21768218	AluJb	+	J	b	19	1	9	0.45	0.4	2	0.14	0.34	1931	171	0	0	299	8	153	5.35	51.17	0.41
20740	0.66	5	0.5	4	0.55	5	0.57	4	0.57	5	1	3	5	0.713333	0.57	-0.143333	0.313473	0.723448	1	21817974	21818200	AluJb	-	J	b	0	0	7	0.16	0.6	2	0.07	0.47	1688	145	3	36	227	5	125	4.41	55.07	0.3
20753	0.75	6	0.75	6	0.71	7	0.62	4	1	4	0.8	5	10	0.806667	0.736667	-0.07	0.358104	0.725865	1	21830993	21831271	AluSc8	-	S	c8	0	0	5	0.15	0.52	9	0.35	0.45	2153	97	0	4	279	10	154	7.17	55.2	0.48
20782	0.78	3	0.83	4	0.95	3	0.96	3	0.96	4	0.83	3	4	0.916667	0.853333	-0.0633333	0.361234	0.72739	1	21846608	21846923	AluJo	-	J	o	0	0	9	0.27	0.52	13	0.43	0.49	1893	146	9	25	316	4	157	2.53	49.68	0.21
20795	0.38	4	1	3	0.58	3	0.62	4	1	4	0.5	4	10	0.706667	0.653333	-0.0533333	0.911156	0.995021	1	21852199	21852500	AluSq2	+	S	q2	19	0.74	10	0.25	0.57	7	0.25	0.48	2329	99	0	0	302	10	167	6.62	55.3	0.43
20800	1	4	0.75	3	1	3	0.92	3	0.86	3	1	3	8	0.926667	0.916667	-0.01	0.722174	0.929145	1	21854836	21855142	AluSx3	-	S	x3	0	0	7	0.29	0.44	10	0.41	0.44	2339	111	0	10	307	8	153	5.21	49.84	0.43
20815	0.89	8	0.67	8	0.44	8	0.76	7	0.92	9	0.94	9	9	0.873333	0.666667	-0.206667	0.166816	0.590952	1	21861827	21862121	AluJo	+	J	o	14	0.93	8	0.26	0.5	2	0.07	0.49	1788	169	14	10	295	9	160	6.1	54.24	0.43
20860	1	3	0.75	4	0.87	3	1	3	1	5	1	4	5	1	0.873333	-0.126667	0.0816029	0.500778	1	21887897	21888149	AluJo	-	J	o	0	0	8	0.17	0.61	7	0.28	0.45	1437	146	130	0	253	5	142	3.95	56.13	0.25
20900	0.61	5	0.68	5	0.85	4	1	5	0.9	5	0.79	5	5	0.896667	0.713333	-0.183333	0.128089	0.535102	1	21915938	21916187	AluJo	+	J	o	16	0.81	8	0.26	0.54	5	0.11	0.61	1279	188	192	0	250	5	131	4	52.4	0.3
20939	0.75	4	0.93	3	0.64	5	0.95	5	0.91	3	0.95	3	12	0.936667	0.773333	-0.163333	0.0916689	0.500778	1	21953897	21954207	AluSp	-	S	p	0	0	12	0.25	0.62	4	0.12	0.51	2406	100	3	3	311	12	157	7.72	50.48	0.61
20975	0.94	4	0.6	4	1	5	1	3	1	3	1	3	11	1	0.846667	-0.153333	0.120401	0.523583	1	21971111	21971423	AluSg7	+	S	g7	30	0.9	7	0.2	0.54	8	0.26	0.5	2477	83	0	13	313	11	164	7.03	52.4	0.52
20998	0.6	5	0.95	4	0.25	8	0.6	5	0.5	4	0.5	4	13	0.533333	0.6	0.0666667	0.589133	0.864834	1	21985435	21985697	AluSp	-	S	p	0	0	5	0.21	0.44	52	0.9	0.68	1940	80	133	0	263	13	142	9.89	53.99	0.68
21028	0.94	6	1	4	1	4	1	3	0.95	5	1	4	6	0.983333	0.98	-0.00333333	0.937517	1	1	22009472	22009764	AluSx	+	S	x	26	0.88	9	0.32	0.48	4	0.19	0.42	1885	150	61	10	293	6	138	4.1	47.1	0.37
21045	1	5	1	4	0.75	4	0.8	5	1	5	0.94	3	8	0.913333	0.916667	0.00333333	0.709778	0.922571	1	22027285	22027577	AluSx3	+	S	x3	20	1	5	0.29	0.38	13	0.45	0.48	2290	119	27	0	293	8	150	5.46	51.19	0.42
21052	1	3	1	3	1	3	1	3	0.8	5	1	3	6	0.933333	1	0.0666667	0.319756	0.723448	1	22035422	22035678	AluJr	-	J	r	0	0	9	0.37	0.44	4	0.29	0.33	1581	159	105	12	257	6	134	4.67	52.14	0.35
21058	0.97	5	0.97	5	1	5	0.97	5	0.98	5	0.95	5	5	0.966667	0.98	0.0133333	0.462026	0.784648	1	22039594	22039902	AluJb	-	J	b	0	0	5	0.2	0.46	5	0.2	0.45	1846	188	0	23	309	5	157	3.24	50.81	0.25
21073	0.77	5	1	3	1	5	0.8	5	1	6	0.97	6	9	0.923333	0.923333	0	0.818745	0.966469	1	22049730	22050024	AluSz	+	S	z	18	0.94	2	0.1	0.41	2	0.12	0.37	2294	108	20	3	295	9	154	6.1	52.2	0.46
21083	1	3	0.88	4	1	5	1	4	1	5	1	4	7	1	0.96	-0.04	0.332932	0.723448	1	22058543	22058784	AluSz	+	S	z	13	0.92	9	0.34	0.46	3	0.23	0.32	1755	124	0	4	242	7	121	5.79	50	0.46
21098	1	6	0.83	6	0.92	6	0.83	6	0.8	5	1	5	6	0.876667	0.916667	0.04	0.784088	0.95361	1	22068188	22068470	AluJr	+	J	r	4	1	2	0.15	0.33	7	0.27	0.46	1685	177	18	7	283	6	148	4.24	52.3	0.31
21102	1	5	1	5	1	5	1	4	1	5	0.96	4	5	0.986667	1	0.0133333	0.407681	0.750069	1	22071827	22072079	AluJb	+	J	b	27	0.81	3	0.24	0.32	1	0.08	0.32	1197	142	206	32	253	5	117	3.95	46.25	0.37
21110	1	3	1	6	1	6	1	3	0.96	5	1	4	7	0.986667	1	0.0133333	0.407681	0.750069	1	22079763	22080034	AluSz	+	S	z	12	0.92	1	0.08	0.31	14	0.43	0.51	1623	147	92	11	272	7	138	5.15	50.74	0.4
21113	0.89	3	1	3	0.95	4	0.93	3	1	4	0.78	3	4	0.903333	0.946667	0.0433333	0.73244	0.932409	1	22081772	22082071	AluJb	+	J	b	27	0.85	2	0.09	0.43	9	0.33	0.47	1844	163	33	3	300	4	150	2.67	50	0.22
21116	0.81	8	0.75	8	0.75	8	0.67	6	0.67	3	1	5	11	0.78	0.77	-0.01	0.526571	0.829408	1	22082692	22082998	AluSx1	+	S	x1	7	1	12	0.42	0.48	7	0.34	0.41	2098	124	19	13	307	11	154	7.17	50.16	0.57
21123	0.67	5	0.85	4	0.75	4	0.92	4	1	4	0.79	3	8	0.903333	0.756667	-0.146667	0.138254	0.551932	1	22088477	22088785	AluSz6	+	S	z6	23	0.87	1	0.06	0.36	11	0.41	0.46	2145	120	3	16	309	8	163	5.18	52.75	0.37
21129	0.51	5	0.91	5	0.9	6	1	5	0.94	6	0.9	6	6	0.946667	0.773333	-0.173333	0.135274	0.546902	1	22092233	22092423	AluSx	+	S	x	29	1	17	0.54	0.51	7	0.28	0.45	930	157	16	94	191	6	91	6.28	47.64	0.56
21153	1	8	1	6	1	4	1	6	0.95	7	0.88	8	9	0.943333	1	0.0566667	0.106517	0.508066	1	22101765	22102047	AluSz6	-	S	z6	0	0	7	0.26	0.47	2	0.11	0.38	1922	131	35	11	283	9	149	6.36	52.65	0.46
21166	0.86	7	0.83	3	0.9	5	0.71	7	1	6	0.75	6	11	0.82	0.863333	0.0433333	0.773942	0.948804	1	22107628	22107946	AluSp	+	S	p	14	0.79	21	0.8	0.46	17	0.58	0.48	2157	88	0	69	319	11	155	6.9	48.59	0.59
21167	0.61	7	0.5	4	0.67	12	0.5	7	0.44	6	0.42	8	14	0.453333	0.593333	0.14	0.196336	0.629835	1	22107958	22108231	AluSz6	+	S	z6	5	1	21	0.82	0.45	14	0.64	0.42	1824	131	47	0	274	14	162	10.22	59.12	0.59
21168	0.74	7	0.48	4	0.87	4	0.75	8	0.59	8	0.82	7	17	0.72	0.696667	-0.0233333	0.957048	1	1	22110588	22110885	AluSp	+	S	p	16	0.94	16	0.51	0.5	21	0.62	0.53	2275	91	3	0	298	17	163	11.41	54.7	0.77
21171	0.8	5	1	4	0.92	4	0.7	4	1	4	0.92	3	8	0.873333	0.906667	0.0333333	0.893356	0.990212	1	22112244	22112527	AluSg	+	S	g	18	0.67	12	0.45	0.46	7	0.27	0.45	2013	123	14	0	284	8	154	5.63	54.23	0.39
21175	0.31	6	0.17	4	0.83	5	0.1	5	0.79	4	0.74	6	11	0.543333	0.436667	-0.106667	0.813697	0.96419	1	22114828	22115107	AluSp	-	S	p	0	0	10	0.39	0.46	5	0.22	0.44	2139	93	21	4	280	11	157	7.86	56.07	0.51
21194	0.89	9	0.79	9	0.83	9	0.89	9	0.83	9	0.88	8	9	0.866667	0.836667	-0.03	0.608687	0.875546	1	22123301	22123623	AluJb	+	J	b	7	1	16	0.52	0.5	5	0.18	0.48	1563	149	0	105	323	9	167	5.57	51.7	0.42
21208	0.97	5	0.8	5	0.96	6	1	5	1	5	1	5	7	1	0.91	-0.09	0.0294313	0.402943	1	22128702	22128988	AluSz	+	S	z	24	0.75	9	0.37	0.44	7	0.25	0.47	2093	108	3	11	287	7	153	4.88	53.31	0.34
21211	0.9	3	0.62	6	0.9	3	0.51	5	1	3	0.93	3	7	0.813333	0.806667	-0.00666667	0.566145	0.85311	1	22129419	22129705	AluJb	+	J	b	5	1	5	0.19	0.46	13	0.46	0.48	1941	150	0	7	287	7	152	4.88	52.96	0.35
21231	0.9	5	0.92	4	0.92	7	0.86	7	0.97	6	0.62	8	10	0.816667	0.913333	0.0966667	0.616428	0.878358	1	22136165	22136424	AluSx	+	S	x	0	0	8	0.3	0.46	13	0.45	0.48	2019	85	4	4	260	10	149	7.69	57.31	0.47
21234	0.59	7	0.35	7	0.5	8	0.38	5	0.69	11	1	7	11	0.69	0.48	-0.21	0.261596	0.707626	1	22137040	22137310	AluSx	-	S	x	0	0	10	0.37	0.47	4	0.16	0.45	1725	111	137	11	271	11	140	8.12	51.66	0.61
21242	1	6	0.94	8	0.84	9	1	5	0.94	6	0.93	7	12	0.956667	0.926667	-0.03	0.76366	0.946621	1	22140370	22140662	AluSx	-	S	x	0	0	1	0.04	0.46	47	1	0.61	2224	82	10	3	293	12	158	8.19	53.92	0.56
21244	0.5	3	1	3	1	3	1	3	1	3	0.89	3	3	0.963333	0.833333	-0.13	0.66706	0.904343	1	22141991	22142118	FLAM_C	+	FLAM_C	None	16	0.81	12	0.39	0.54	7	0.19	0.54	776	164	23	0	128	3	67	4.69	52.34	0.34
21260	0.95	3	1	3	1	3	1	3	0.89	3	1	3	3	0.963333	0.983333	0.02	0.768863	0.948264	1	22153386	22153428	AluYc	+	Y	c	4	0.5	10	0.32	0.5	9	0.31	0.48	332	70	23	0	43	3	26	13.95	60.47	0.78
21268	1	4	1	4	0.92	4	0.96	4	0.98	4	1	4	4	0.98	0.973333	-0.00666667	0.989501	1	1	22161633	22161779	FAM	-	FAM	None	0	0	17	0.4	0.58	5	0.17	0.49	706	191	170	0	147	4	73	5.44	49.66	0.44
21274	1	5	0.75	6	1	6	1	8	0.71	7	0.75	6	15	0.82	0.916667	0.0966667	0.438024	0.772502	1	22163786	22164081	AluSx	-	S	x	0	0	16	0.35	0.6	14	0.42	0.52	2181	68	14	37	296	15	166	10.14	56.08	0.65
21309	0.65	5	1	4	0.75	5	0.83	4	1	4	0.91	4	5	0.913333	0.8	-0.113333	0.616128	0.878244	1	22193614	22193875	AluJr	-	J	r	0	0	3	0.12	0.46	5	0.19	0.47	1379	176	141	11	262	5	123	3.82	46.95	0.35
21375	1	7	0.84	7	0.86	7	0.78	8	0.89	11	0.62	4	14	0.763333	0.9	0.136667	0.201629	0.636326	1	22242713	22243026	AluY	+	Y	None	29	0.83	12	0.4	0.49	12	0.45	0.46	2237	121	0	13	314	14	159	8.92	50.64	0.72
21400	1	3	1	3	1	3	1	3	1	3	1	3	3	1	1	0	1	1	1	22255895	22256064	AluJb	-	J	b	0	0	7	0.2	0.53	11	0.37	0.51	1037	200	0	0	170	3	86	3.53	50.59	0.28
21436	0.92	3	0.35	3	0.91	4	0.54	4	0.87	3	0.85	4	4	0.753333	0.726667	-0.0266667	0.916607	0.995763	1	22285088	22285239	AluJr	+	J	r	22	0.82	5	0.15	0.52	2	0.08	0.45	729	125	0	132	152	4	84	5.26	55.26	0.36
21442	1	3	1	4	0.92	6	0.89	3	1	4	0.67	3	6	0.853333	0.973333	0.12	0.288556	0.723448	1	22286421	22286701	AluJo	+	J	o	7	0.86	4	0.14	0.48	9	0.32	0.47	956	196	103	71	281	6	156	4.27	55.52	0.28
21514	0.5	3	0.83	6	1	7	0.17	6	0.33	6	1	4	8	0.5	0.776667	0.276667	0.553196	0.845619	1	22321211	22321518	AluJb	+	J	b	25	1	5	0.14	0.54	4	0.14	0.47	2039	149	3	7	308	8	156	5.19	50.65	0.41
21517	0.83	4	0.46	4	0.5	5	0.72	5	0.67	5	0.5	4	8	0.63	0.596667	-0.0333333	0.909009	0.994988	1	22323572	22323870	AluSz	+	S	z	27	0.78	6	0.19	0.5	7	0.3	0.43	2119	120	33	3	299	8	156	5.35	52.17	0.4
21563	0.89	4	0.98	4	0.75	3	1	4	0.89	4	0.91	4	5	0.933333	0.873333	-0.06	0.562466	0.851439	1	22343447	22343767	AluJb	+	J	b	20	0.75	4	0.15	0.46	5	0.18	0.48	1844	140	3	62	321	5	165	3.12	51.4	0.24
21580	0	7	0	6	0.2	10	0	7	0	7	0.11	8	17	0.0366667	0.0666667	0.03	0.853329	0.977915	1	22351115	22351398	AluSx1	-	S	x1	0	0	7	0.22	0.51	16	0.49	0.51	2233	99	0	0	284	17	161	11.97	56.69	0.75
21583	0.15	10	0.3	11	0	9	0.15	8	0	8	0.07	10	14	0.0733333	0.15	0.0766667	0.662734	0.902113	1	22352759	22353067	AluSx	-	S	x	0	0	21	0.56	0.55	10	0.37	0.47	2160	110	7	16	309	14	160	9.06	51.78	0.68
21592	1	5	0.92	5	0.82	6	1	6	1	6	0.98	5	7	0.99	0.913333	-0.0766667	0.140328	0.553225	1	22359292	22359567	AluSx3	-	S	x3	0	0	14	0.58	0.45	3	0.12	0.45	1836	141	80	0	276	7	140	5.07	50.72	0.4
21595	1	5	0.77	6	1	4	0.8	5	0.53	3	0.8	5	6	0.71	0.923333	0.213333	0.0654314	0.500778	1	22360439	22360739	AluJb	-	J	b	0	0	12	0.36	0.52	6	0.18	0.51	1947	173	0	7	301	6	149	3.99	49.5	0.33
21607	0.75	4	0.92	3	0.85	4	0.65	3	0.96	4	1	3	5	0.87	0.84	-0.03	0.386746	0.73923	1	22366914	22367218	AluJo	+	J	o	29	0.69	3	0.11	0.47	13	0.38	0.52	1821	184	7	0	305	5	151	3.28	49.51	0.27
21608	1	5	0.96	6	0.92	6	0.94	7	1	7	0.78	6	10	0.906667	0.96	0.0533333	0.628679	0.884428	1	22367219	22367562	AluSx	+	S	x	14	0.93	6	0.22	0.47	6	0.25	0.44	1950	99	0	137	344	10	181	5.81	52.62	0.42
21627	0.8	5	0.96	6	0.79	7	0.93	5	1	6	1	5	9	0.976667	0.85	-0.126667	0.0637379	0.500778	1	22378036	22378318	AluJb	+	J	b	8	0.88	21	0.71	0.49	16	0.46	0.53	1775	156	32	7	283	9	153	6.36	54.06	0.44
21629	0.82	11	0.71	11	0.27	12	0.74	11	0.77	11	0.79	11	15	0.766667	0.6	-0.166667	0.367238	0.72739	1	22378622	22378926	AluSx1	+	S	x1	22	0.82	12	0.38	0.51	51	0.87	0.69	2142	112	10	13	305	15	171	9.84	56.07	0.64
21631	0.65	5	0.77	7	0.39	6	0.25	4	0.83	5	0.79	4	10	0.623333	0.603333	-0.02	0.879643	0.986145	1	22380689	22380945	AluJb	-	J	b	0	0	10	0.5	0.4	3	0.3	0.29	1448	113	0	93	257	10	137	7.78	53.31	0.55
21633	0.56	3	0.39	3	0.83	3	0.54	3	0.61	3	0.52	3	5	0.556667	0.593333	0.0366667	0.724025	0.930111	1	22381984	22382275	AluJb	-	J	b	0	0	19	0.71	0.46	1	0.06	0.36	1803	168	14	7	292	5	150	3.42	51.37	0.26
21636	1	3	0.93	5	0.81	6	1	4	1	5	0.75	4	11	0.916667	0.913333	-0.00333333	0.690962	0.913991	1	22384214	22384521	AluSx1	-	S	x1	0	0	14	0.51	0.47	4	0.23	0.38	2334	94	0	16	308	11	165	7.14	53.57	0.5
21647	1	3	0.75	3	1	4	0.76	5	1	4	0.83	4	6	0.863333	0.916667	0.0533333	0.512104	0.820257	1	22390786	22391083	AluSx	-	S	x	0	0	7	0.34	0.41	9	0.35	0.46	1898	154	7	17	298	6	152	4.03	51.01	0.31
21648	0.95	4	0.73	6	0.92	4	0.91	5	0.89	5	0.97	5	8	0.923333	0.866667	-0.0566667	0.508974	0.817892	1	22391182	22391472	AluSx1	-	S	x1	0	0	6	0.25	0.44	5	0.29	0.37	1902	96	38	45	291	8	150	5.5	51.55	0.41
21654	0.94	9	0.93	9	1	10	0.97	9	0.96	8	0.61	6	11	0.846667	0.953333	0.106667	0.406444	0.750069	1	22393811	22394133	AluSx	-	S	x	0	0	11	0.37	0.51	3	0.11	0.48	1726	96	43	96	323	11	173	6.81	53.56	0.48
21669	0.83	6	0.86	4	1	4	0.57	5	0.31	4	0.97	6	6	0.616667	0.896667	0.28	0.285717	0.723448	1	22403352	22403662	AluJb	+	J	b	14	0.93	3	0.16	0.39	2	0.17	0.32	1717	148	10	61	311	6	166	3.86	53.38	0.28
21682	0.67	4	1	7	0.78	8	0.86	7	1	8	1	7	8	0.953333	0.816667	-0.136667	0.32009	0.723448	1	22425259	22425545	AluJb	-	J	b	0	0	1	0.07	0.34	3	0.13	0.43	1935	136	17	0	287	8	160	5.57	55.75	0.36
21773	1	3	0.98	6	1	3	1	4	1	4	0.92	5	10	0.973333	0.993333	0.02	0.534889	0.834251	1	22496978	22497276	AluSz	+	S	z	12	1	5	0.16	0.51	5	0.17	0.49	2217	110	0	10	299	10	158	6.69	52.84	0.48
21810	0.6	5	0.42	5	0.83	6	0.94	3	0.98	7	0.93	7	8	0.95	0.616667	-0.333333	0.012059	0.302896	1	22521542	22521771	AluSz6	+	S	z6	23	1	1	0.06	0.36	10	0.43	0.43	1752	113	0	0	230	8	114	6.96	49.57	0.57
21831	0.85	3	0.95	4	0.25	3	1	4	0.78	3	0.67	3	5	0.816667	0.683333	-0.133333	0.53392	0.833747	1	22541078	22541390	AluSx	-	S	x	0	0	0	0	0.29	2	0.15	0.33	2095	137	3	13	313	5	152	3.19	48.56	0.28
21865	0.63	5	0.5	4	0.78	3	0.87	4	0.96	5	0.7	5	8	0.843333	0.636667	-0.206667	0.11696	0.520557	1	22563962	22564256	AluSq2	+	S	q2	15	0.87	6	0.17	0.53	6	0.2	0.5	1999	146	10	0	295	8	153	5.42	51.86	0.41
21903	0.65	5	0.64	7	0.2	5	0.5	6	0.67	6	0.9	7	11	0.69	0.496667	-0.193333	0.280666	0.723448	1	22595714	22596024	AluSx3	-	S	x3	0	0	9	0.23	0.55	6	0.17	0.53	2072	106	10	45	311	11	165	7.07	53.05	0.5
21935	0.9	5	1	5	0.92	3	0.88	4	1	3	1	3	7	0.96	0.94	-0.02	0.559761	0.849685	1	22621146	22621438	AluSz	-	S	z	0	0	2	0.08	0.44	2	0.08	0.44	2130	130	3	3	293	7	148	4.78	50.51	0.37
21949	1	3	0.88	8	0.5	5	0.92	9	0.9	5	0.95	11	12	0.923333	0.793333	-0.13	0.792896	0.957315	1	22638781	22639116	AluSz	-	S	z	0	0	4	0.16	0.46	7	0.25	0.47	2233	86	0	95	336	12	181	7.14	53.87	0.5
21955	0.75	4	0.92	9	0.83	10	0.86	7	0.93	7	1	8	11	0.93	0.833333	-0.0966667	0.18719	0.620206	1	22643116	22643421	AluSg	+	S	g	20	1	3	0.12	0.45	5	0.19	0.47	2267	88	7	26	306	11	162	7.19	52.94	0.52
21985	0.67	3	0.45	3	0.67	3	0.17	3	0.75	3	0.95	4	5	0.623333	0.596667	-0.0266667	0.744193	0.938001	1	22667734	22668024	AluSq2	-	S	q2	0	0	4	0.12	0.52	8	0.22	0.54	1935	113	24	3	291	5	150	3.44	51.55	0.26
21993	1	4	0.93	5	0.88	4	1	3	1	4	1	4	7	1	0.936667	-0.0633333	0.0926649	0.500778	1	22679447	22679747	AluJb	-	J	b	0	0	6	0.39	0.35	6	0.48	0.32	1880	130	50	13	301	7	158	4.65	52.49	0.34
22043	0.47	3	0.52	3	0.27	3	1	3	0.67	5	0.79	3	8	0.82	0.42	-0.4	0.0679495	0.500778	1	22720376	22720665	AluSp	+	S	p	11	0.82	4	0.15	0.46	3	0.17	0.45	1902	138	14	7	290	8	150	5.52	51.72	0.42
22047	0.94	6	0.87	7	0.7	5	0.74	6	0.55	4	0.72	6	7	0.67	0.836667	0.166667	0.132324	0.541846	1	22724711	22725000	AluJb	+	J	b	10	0.8	4	0.2	0.4	5	0.27	0.39	2094	131	10	0	290	7	158	4.83	54.48	0.33
22057	0.8	5	0.5	4	0.6	5	0.82	4	0.9	5	1	3	9	0.906667	0.633333	-0.273333	0.0641302	0.500778	1	22731933	22732173	AluSx1	-	S	x1	0	0	4	0.27	0.35	5	0.31	0.36	1853	108	0	4	241	9	132	7.47	54.77	0.53
22072	0.78	5	0.89	5	0.61	4	0.88	4	0.95	5	1	5	8	0.943333	0.76	-0.183333	0.0676723	0.500778	1	22741543	22741849	AluSx	+	S	x	22	1	7	0.2	0.53	7	0.22	0.51	2360	94	0	13	307	8	160	5.21	52.12	0.39
22085	0.87	3	0.88	4	0.58	3	0.75	4	0.88	4	0.71	7	12	0.78	0.776667	-0.00333333	0.909399	0.994988	1	22747382	22747673	AluSc	-	S	c	0	0	11	0.29	0.55	6	0.25	0.44	2234	96	27	0	292	12	157	8.22	53.77	0.58
22098	0.86	7	0.75	6	0.95	5	1	8	0.74	5	1	4	13	0.913333	0.853333	-0.06	0.261172	0.707255	1	22756204	22756505	AluSp	+	S	p	15	0.93	14	0.6	0.43	1	0.06	0.36	2402	73	0	13	302	13	164	8.61	54.3	0.59
22110	0.65	7	0.71	4	0.42	5	0.53	6	0.9	5	0.85	6	12	0.76	0.593333	-0.166667	0.232906	0.674373	1	22764337	22764645	AluSp	+	S	p	21	0.81	10	0.43	0.44	0	0	0.36	2279	84	7	29	309	12	163	7.77	52.75	0.56
22181	1	4	0.96	5	0.92	3	0.88	4	0.75	4	1	4	6	0.876667	0.96	0.0833333	0.476342	0.795819	1	22855028	22855328	AluJo	-	J	o	0	0	4	0.17	0.44	9	0.26	0.53	1825	139	17	43	301	6	161	3.99	53.49	0.28
22195	1	8	0.7	10	0.65	9	0.79	9	0.82	10	0.79	11	11	0.8	0.783333	-0.0166667	0.606658	0.874271	1	22866311	22866616	AluJb	-	J	b	0	0	6	0.26	0.45	4	0.12	0.51	1965	134	16	29	306	11	157	7.19	51.31	0.55
22208	0.83	7	0.5	8	0.85	5	0.8	7	0.48	8	0.89	6	13	0.723333	0.726667	0.00333333	0.975635	1	1	22875500	22875785	AluSz	-	S	z	0	0	6	0.17	0.53	8	0.24	0.53	2234	87	0	3	286	13	162	9.09	56.64	0.57
22221	0.8	5	0.78	6	0.67	5	1	5	0.97	6	0.87	6	7	0.946667	0.75	-0.196667	0.032222	0.415271	1	22887747	22888061	AluJb	-	J	b	0	0	3	0.09	0.53	6	0.21	0.48	1930	146	19	44	315	7	162	4.44	51.43	0.34
22289	0.44	3	0.33	3	0.47	3	0.86	3	0.72	3	0.43	3	3	0.67	0.413333	-0.256667	0.11901	0.522861	1	22949844	22949980	AluJb	-	J	b	0	0	4	0.14	0.48	7	0.24	0.49	1545	193	27	37	137	3	72	4.38	52.55	0.32
22292	0.75	5	0.6	7	0.6	7	0.73	5	0.93	5	1	3	11	0.886667	0.65	-0.236667	0.0806134	0.500778	1	22950821	22951066	AluSz	+	S	z	0	0	7	0.25	0.49	9	0.36	0.46	1904	85	12	4	246	11	135	8.94	54.88	0.61
22298	0.8	5	1	4	0.8	5	0.85	5	0.79	6	0.83	6	10	0.823333	0.866667	0.0433333	0.394779	0.74551	1	22954840	22955131	AluSc	+	S	c	17	0.82	12	0.45	0.46	8	0.26	0.49	2202	110	0	3	292	10	152	6.85	52.05	0.51
22436	1	3	1	4	0.88	4	0.89	3	1	4	0.88	4	4	0.923333	0.96	0.0366667	0.477818	0.796656	1	23048101	23048408	AluJb	-	J	b	0	0	8	0.29	0.48	5	0.19	0.46	1873	188	10	7	308	4	152	2.6	49.35	0.22
22467	1	5	0.9	5	0.9	5	0.83	3	1	4	0.93	3	7	0.92	0.933333	0.0133333	0.947625	1	1	23065701	23066008	AluSz	-	S	z	0	0	3	0.11	0.48	11	0.32	0.52	2291	123	0	0	308	7	162	4.55	52.6	0.33
22493	0.89	3	1	3	1	3	1	3	1	3	1	3	3	1	0.963333	-0.0366667	0.335911	0.723448	1	23079291	23079573	AluJo	-	J	o	0	0	4	0.28	0.34	7	0.2	0.53	1785	187	11	0	283	3	147	2.12	51.94	0.16
22619	0.67	4	0.97	6	1	7	0.89	7	0.87	4	0.95	4	9	0.903333	0.88	-0.0233333	0.592758	0.866808	1	23166950	23167252	AluSz6	-	S	z6	0	0	6	0.28	0.42	3	0.13	0.44	2035	158	7	0	303	9	154	5.94	50.83	0.47
22652	0.95	3	0.67	3	0.67	3	0.85	3	0.97	4	1	3	5	0.94	0.763333	-0.176667	0.129223	0.537324	1	23190268	23190515	AluJo	-	J	o	0	0	6	0.17	0.54	10	0.36	0.48	1516	141	16	28	248	5	133	4.03	53.63	0.3
22681	1	5	1	5	0.8	5	1	5	1	5	1	5	6	1	0.933333	-0.0666667	0.319756	0.723448	1	23208100	23208385	AluSq2	-	S	q2	0	0	3	0.09	0.5	6	0.17	0.54	2069	122	7	0	286	6	154	4.2	53.85	0.29
22759	0.5	4	0.96	5	0.33	6	1	3	1	3	1	4	9	1	0.596667	-0.403333	0.0151194	0.325883	1	23271825	23272124	AluSg	-	S	g	0	0	6	0.21	0.48	9	0.48	0.39	2149	110	3	0	300	9	163	6	54.33	0.41
22800	0.89	4	0.91	4	0.81	4	0.94	4	0.95	4	0.77	4	4	0.886667	0.87	-0.0166667	0.594975	0.867462	1	23300023	23300327	AluJb	+	J	b	28	0.93	4	0.14	0.48	6	0.25	0.45	1783	164	30	20	305	4	147	2.62	48.2	0.23
22808	0.75	4	0.93	5	1	4	0.94	4	1	5	0.93	5	8	0.956667	0.893333	-0.0633333	0.630906	0.88573	1	23303699	23304013	AluSx1	+	S	x1	38	0.76	5	0.2	0.45	4	0.17	0.46	2152	130	13	22	315	8	162	5.08	51.43	0.39
22820	0.93	5	0.92	6	0.86	7	0.49	5	0.82	7	0.75	9	14	0.686667	0.903333	0.216667	0.0479895	0.463071	1	23310835	23311159	AluSq2	+	S	q2	29	0.83	5	0.17	0.49	8	0.27	0.49	2365	83	0	40	325	14	175	8.62	53.85	0.61
22837	1	5	0.36	5	0.87	5	0.9	5	0.9	5	0.73	5	8	0.843333	0.743333	-0.1	0.901576	0.992922	1	23333392	23333687	AluJb	+	J	b	15	1	6	0.17	0.53	5	0.22	0.43	2057	142	7	3	296	8	155	5.41	52.36	0.4
22861	1	3	1	4	1	3	1	3	1	3	1	3	7	1	1	0	1	1	1	23344204	23344515	AluSz	+	S	z	30	0.83	23	0.85	0.48	6	0.42	0.35	2394	106	0	0	312	7	162	4.49	51.92	0.34
22862	0.7	5	0.95	5	1	5	1	5	0.82	5	0.92	4	5	0.913333	0.883333	-0.03	0.966372	1	1	23344619	23344763	FLAM_A	-	FLAM_A	None	0	0	9	0.38	0.44	6	0.42	0.34	830	186	0	28	145	5	67	6.9	46.21	0.66
22873	0.95	3	0.6	3	0.67	3	1	3	0.63	3	0.67	3	3	0.766667	0.74	-0.0266667	0.682102	0.909712	1	23354645	23354821	AluJb	-	J	b	0	0	1	0.07	0.35	0	0	0.36	888	158	17	90	177	3	98	3.39	55.37	0.22
22875	1	4	0.83	6	0.96	6	0.67	6	1	3	0.8	5	7	0.823333	0.93	0.106667	0.525989	0.829063	1	23359405	23359652	AluSg	-	S	g	0	0	4	0.35	0.32	7	0.33	0.42	1828	85	153	0	248	7	139	5.65	56.05	0.36
22876	1	4	0.92	4	1	3	0.92	3	0.92	4	0.75	4	7	0.863333	0.973333	0.11	0.061057	0.49798	1	23359745	23360045	AluSx	+	S	x	33	0.82	9	0.38	0.43	2	0.14	0.37	2148	106	47	10	301	7	150	4.65	49.83	0.38
22926	0.41	5	0.26	5	0.38	4	0.43	5	0.58	3	0.34	5	5	0.45	0.35	-0.1	0.388164	0.740245	1	23429439	23429737	AluJr	-	J	r	0	0	2	0.13	0.35	4	0.23	0.38	1563	147	43	53	299	5	153	3.34	51.17	0.27
22927	0.95	7	0.88	7	0.91	8	0.88	8	1	6	0.96	8	11	0.946667	0.913333	-0.0333333	0.319939	0.723448	1	23430664	23430976	AluSz	-	S	z	0	0	3	0.12	0.49	1	0.05	0.38	2222	112	3	16	313	11	155	7.03	49.52	0.58
22953	0.83	7	0.74	7	0.94	6	0.71	7	0.79	6	0.72	6	7	0.74	0.836667	0.0966667	0.239182	0.681077	1	23446419	23446730	AluJb	-	J	b	0	0	3	0.2	0.35	4	0.18	0.43	1719	192	0	19	312	7	153	4.49	49.04	0.37
22979	1	4	0.92	4	1	3	1	3	0.92	4	0.79	4	8	0.903333	0.973333	0.07	0.356165	0.724797	1	23464474	23464766	AluSx	-	S	x	0	0	4	0.21	0.39	3	0.22	0.35	2072	126	3	14	293	8	151	5.46	51.54	0.41
22980	1	3	0.89	3	1	5	1	3	1	3	0.96	3	8	0.986667	0.963333	-0.0233333	0.698985	0.91778	1	23465214	23465513	AluSx	+	S	x	23	1	5	0.35	0.35	2	0.13	0.35	2190	117	17	0	300	8	154	5.33	51.33	0.41
22995	1	4	1	4	1	4	1	4	0.96	4	0.96	4	4	0.973333	1	0.0266667	0.128058	0.535089	1	23473017	23473297	AluJb	+	J	b	7	1	13	0.48	0.47	19	0.59	0.51	1855	139	14	11	281	4	148	2.85	52.67	0.21
23001	0.64	7	0.72	7	0.86	7	1	7	1	8	0.5	4	16	0.833333	0.74	-0.0933333	0.215375	0.653728	1	23476186	23476477	AluSc	+	S	c	24	1	2	0.1	0.39	3	0.2	0.36	2395	65	38	0	292	16	155	10.96	53.08	0.78
23006	0.75	4	0.83	4	0.97	4	0.89	4	0.94	4	0.67	3	4	0.833333	0.85	0.0166667	0.824869	0.968528	1	23480218	23480404	AluJb	+	J	b	0	0	2	0.14	0.37	3	0.14	0.41	917	171	134	27	187	4	98	4.28	52.41	0.31
23034	0.57	7	0.43	12	0.43	11	0.77	14	0.66	10	0.67	12	17	0.7	0.476667	-0.223333	0.0596402	0.494401	1	23495576	23495852	AluJb	+	J	b	17	0.88	46	0.88	0.66	8	0.28	0.48	1966	101	61	4	277	17	150	12.27	54.15	0.86
23039	1	5	1	3	1	5	0.94	6	0.94	5	0.9	5	6	0.926667	1	0.0733333	0.0021662	0.170621	1	23497292	23497593	AluJb	+	J	b	12	1	9	0.41	0.42	3	0.12	0.44	1867	126	10	36	302	6	160	3.97	52.98	0.28
23043	1	4	1	5	1	6	1	6	0.97	6	1	6	11	0.99	1	0.01	0.455388	0.780407	1	23499317	23499605	AluSg	-	S	g	0	0	10	0.37	0.47	1	0.04	0.45	2189	90	38	0	289	11	145	7.61	50.17	0.61
23085	0.86	5	0.92	5	0.88	5	0.89	5	0.9	5	0.91	5	5	0.9	0.886667	-0.0133333	0.767296	0.948148	1	23516704	23516982	AluJo	-	J	o	0	0	4	0.13	0.51	7	0.3	0.43	1672	143	122	4	279	5	142	3.58	50.9	0.28
23113	1	9	1	8	0.93	7	1	8	1	7	0.84	7	11	0.946667	0.976667	0.03	0.78337	0.953234	1	23529405	23529691	AluSx	-	S	x	0	0	0	0	0.42	3	0.12	0.45	2104	94	56	0	287	11	157	7.67	54.7	0.52
23121	1	9	0.93	7	0.73	5	0.9	8	1	7	0.62	8	17	0.84	0.886667	0.0466667	0.838864	0.974046	1	23532539	23532822	AluYc	-	Y	c	0	0	7	0.22	0.52	2	0.06	0.54	2351	74	0	3	284	17	160	11.97	56.34	0.77
23144	1	3	1	4	1	4	1	3	0.88	4	1	4	20	0.96	1	0.04	0.332932	0.723448	1	23546330	23546639	AluYa8	+	Y	a8	30	0.87	6	0.21	0.48	4	0.12	0.51	2734	39	0	0	310	20	173	12.9	55.81	0.83
23174	0.92	4	0.88	4	0.64	4	0.94	4	0.77	4	1	4	4	0.903333	0.813333	-0.09	0.297197	0.723448	1	23559262	23559417	AluJo	-	J	o	0	0	8	0.25	0.51	2	0.07	0.47	939	147	51	13	156	4	83	5.13	53.21	0.36
23197	1	3	0.5	6	0.65	4	0.88	4	1	3	0.83	6	16	0.903333	0.716667	-0.186667	0.541203	0.838428	1	23567833	23568083	AluYc	+	Y	c	30	0.9	13	0.41	0.51	5	0.27	0.39	1969	60	0	32	251	16	126	12.75	50.2	1.02
23213	0.96	4	0.88	4	0.94	4	1	3	1	3	0.89	3	4	0.963333	0.926667	-0.0366667	0.238161	0.680115	1	23575463	23575781	AluJr	+	J	r	29	0.86	9	0.33	0.47	4	0.28	0.34	1949	157	3	28	319	4	146	2.51	45.77	0.24
23243	0.97	8	0.93	5	0.69	7	0.97	5	0.73	7	1	4	13	0.9	0.863333	-0.0366667	0.560099	0.849927	1	23589254	23589522	AluSc	+	S	c	20	1	22	0.67	0.52	4	0.17	0.44	2005	78	7	26	269	13	137	9.67	50.93	0.75
23256	0.94	3	0.57	5	0.74	6	1	4	0.84	4	0.92	5	6	0.92	0.75	-0.17	0.19278	0.626236	1	23594363	23594673	AluJr	-	J	r	0	0	4	0.16	0.44	5	0.23	0.41	1796	167	0	29	311	6	152	3.86	48.87	0.32
23266	0.71	7	0.56	4	0.46	4	0.66	7	0.71	4	0.72	3	7	0.696667	0.576667	-0.12	0.289681	0.723448	1	23601349	23601587	AluSz6	+	S	z6	20	0.8	1	0.07	0.35	6	0.22	0.48	1280	134	264	0	239	7	134	5.86	56.07	0.37
23285	1	4	1	5	1	5	0.9	5	1	5	1	5	5	0.966667	1	0.0333333	0.339508	0.723448	1	23621681	23621823	FLAM_C	+	FLAM_C	None	15	0.87	4	0.25	0.36	7	0.3	0.43	778	133	0	77	143	5	76	6.99	53.15	0.5
23292	1	3	0.94	4	1	4	1	3	1	4	1	4	5	1	0.98	-0.02	0.367384	0.72739	1	23625305	23625598	AluJb	-	J	b	0	0	9	0.36	0.45	1	0.07	0.33	2031	153	7	3	294	5	153	3.4	52.04	0.26
23303	1	4	1	3	1	3	1	3	1	3	1	3	9	1	1	0	1	1	1	23644196	23644478	AluSg4	+	S	g4	6	1	11	0.36	0.5	1	0.1	0.29	2223	95	11	0	283	9	154	6.36	54.42	0.44
23320	0.9	5	0.74	6	0.87	6	0.81	5	0.95	5	0.75	6	9	0.836667	0.836667	0	0.866614	0.982758	1	23658414	23658617	AluSx1	+	S	x1	0	0	7	0.24	0.49	5	0.21	0.45	1562	113	0	0	204	9	119	8.82	58.33	0.52
23334	0.67	12	0.96	8	0.75	8	0.89	9	0.67	6	0.8	5	15	0.786667	0.793333	0.00666667	0.75556	0.942668	1	23671924	23672225	AluSq	+	S	q	25	0.92	10	0.41	0.45	20	0.75	0.47	2261	103	20	0	302	15	157	9.93	51.99	0.74
23335	1	9	0.94	8	1	10	0.88	8	1	10	0.93	5	18	0.936667	0.98	0.0433333	0.358672	0.726304	1	23672329	23672625	AluSq2	+	S	q2	17	0.71	17	0.63	0.47	11	0.59	0.39	2257	98	7	0	297	18	164	12.12	55.22	0.8
23336	0.92	6	0.98	6	0.95	7	0.93	7	0.96	7	0.95	7	7	0.946667	0.95	0.00333333	0.727615	0.930552	1	23672790	23672926	FLAM_C	-	FLAM_C	None	0	0	20	0.74	0.48	15	0.79	0.39	621	125	0	182	137	7	71	10.22	51.82	0.76
23339	0.75	5	1	4	1	4	1	4	0.88	4	0.85	4	5	0.91	0.916667	0.00666667	0.637342	0.889689	1	23673786	23674045	AluJb	-	J	b	0	0	27	0.73	0.55	3	0.17	0.37	1074	158	0	127	260	5	114	3.85	43.85	0.4
23359	0.92	4	0.83	6	1	4	1	5	1	3	1	5	9	1	0.916667	-0.0833333	0.0907667	0.500778	1	23682345	23682635	AluSz6	+	S	z6	9	0.78	2	0.07	0.48	2	0.09	0.44	2181	93	3	14	291	9	165	6.19	56.7	0.39
23362	1	3	0.67	3	1	3	0.96	3	0.75	3	0.82	3	3	0.843333	0.89	0.0466667	0.330997	0.723448	1	23684644	23684945	AluJb	+	J	b	20	1	5	0.23	0.42	6	0.29	0.41	1702	162	23	23	302	3	152	1.99	50.33	0.16
23367	0.88	4	1	4	1	4	1	3	1	4	1	4	4	1	0.96	-0.04	0.332932	0.723448	1	23690251	23690546	AluJr	+	J	r	10	1	4	0.2	0.4	11	0.48	0.43	1949	155	3	10	296	4	143	2.7	48.31	0.23
23370	0.75	3	0.76	7	0.67	6	0.67	6	0.69	4	0.67	6	14	0.676667	0.726667	0.05	0.517718	0.823927	1	23691605	23691916	AluY	+	Y	None	28	0.82	0	0	0.39	8	0.29	0.47	2444	83	0	10	312	14	165	8.97	52.88	0.64
23385	1	3	0.93	4	1	4	1	4	1	4	1	3	4	1	0.976667	-0.0233333	0.35706	0.724797	1	23702575	23702857	AluJo	+	J	o	7	1	9	0.31	0.48	6	0.32	0.39	1741	191	11	3	283	4	141	2.83	49.82	0.23
23387	0.3	5	0.83	3	0.67	3	0.33	3	0.44	3	1	3	12	0.59	0.6	0.01	0.666912	0.904299	1	23704255	23704563	AluSx1	+	S	x1	11	1	10	0.41	0.45	9	0.32	0.48	2288	74	7	58	309	12	159	7.77	51.46	0.59
23434	0.92	3	0.71	4	0.95	5	0.83	3	0.76	6	0.78	4	7	0.79	0.86	0.07	0.282327	0.723448	1	23728552	23728861	AluSz6	+	S	z6	28	0.82	10	0.3	0.52	9	0.3	0.51	1925	161	3	0	310	7	154	4.52	49.68	0.37
23449	0.83	5	0.8	5	0.72	5	1	4	0.8	4	0.75	4	6	0.85	0.783333	-0.0666667	0.349788	0.723904	1	23740889	23741193	AluSg7	-	S	g7	0	0	7	0.36	0.39	7	0.43	0.36	1894	132	0	4	305	6	155	3.93	50.82	0.3
23474	0.74	7	0.6	6	0.53	6	0.6	5	0.75	5	0.67	6	10	0.673333	0.623333	-0.05	0.649891	0.895609	1	23762668	23762955	AluSz6	-	S	z6	0	0	8	0.2	0.57	25	0.51	0.63	2004	118	7	0	288	10	154	6.94	53.47	0.49
23478	0.95	5	1	4	0.49	6	1	5	0.79	7	1	3	14	0.93	0.813333	-0.116667	0.537938	0.836285	1	23767069	23767368	AluY	+	Y	None	20	1	11	0.4	0.47	7	0.22	0.5	2372	63	3	3	300	14	159	9.33	53	0.67
23516	0.89	5	0.6	5	0.88	4	0.9	5	0.97	6	1	6	10	0.956667	0.79	-0.166667	0.0633079	0.500778	1	23788985	23789268	AluSc8	+	S	c8	17	0.88	21	0.65	0.51	2	0.07	0.47	2003	92	46	0	284	10	155	7.04	54.58	0.48
23560	1	3	0.93	7	0.74	6	1	3	1	7	0.97	6	7	0.99	0.89	-0.1	0.192964	0.626442	1	23812047	23812349	AluJb	+	J	b	30	0.9	6	0.29	0.4	4	0.17	0.43	1912	155	20	0	303	7	147	4.62	48.51	0.4
23568	0.89	9	0.3	5	0.4	5	1	8	1	3	0.88	4	11	0.96	0.53	-0.43	0.0256577	0.387478	1	23815462	23815768	AluY	-	Y	None	0	0	4	0.17	0.44	5	0.27	0.39	2174	67	0	14	307	11	164	7.17	53.42	0.51
23570	0.72	3	0.84	3	0.69	3	0.73	3	0.81	3	0.6	3	3	0.713333	0.75	0.0366667	0.716703	0.926379	1	23817025	23817189	AluJr4	+	J	r4	0	0	3	0.12	0.46	3	0.1	0.52	891	170	0	55	165	3	79	3.64	47.88	0.33
23589	0.89	3	1	3	0.79	6	0.67	3	0.62	3	0.67	3	10	0.653333	0.893333	0.24	0.0720623	0.500778	1	23826364	23826686	AluY	+	Y	None	24	0.96	5	0.22	0.43	5	0.25	0.4	2320	65	0	56	323	10	173	6.19	53.56	0.44
23594	1	4	1	3	1	3	1	5	1	5	0.9	5	6	0.966667	1	0.0333333	0.339508	0.723448	1	23828589	23828898	AluJo	-	J	o	0	0	7	0.29	0.44	2	0.14	0.34	1762	181	10	3	310	6	165	3.87	53.23	0.28
23596	1	6	1	5	0.5	4	0.86	7	0.75	4	1	4	12	0.87	0.833333	-0.0366667	0.744731	0.938143	1	23832012	23832304	AluSc8	-	S	c8	0	0	7	0.23	0.5	6	0.19	0.5	2058	106	3	7	293	12	153	8.19	52.22	0.6
23602	0.58	5	0.83	4	0.72	6	0.67	5	0.81	4	0.83	5	8	0.77	0.71	-0.06	0.58751	0.863972	1	23838408	23838732	AluSq	+	S	q	41	0.78	6	0.21	0.48	8	0.28	0.48	2136	113	0	3	325	8	157	4.92	48.31	0.43
23616	1	6	1	5	1	5	1	4	1	7	0.94	7	8	0.98	1	0.02	0.367384	0.72739	1	23844380	23844670	AluSz6	+	S	z6	8	1	6	0.25	0.44	8	0.29	0.48	1941	144	3	7	291	8	156	5.5	53.61	0.39
23619	1	4	0.88	4	1	3	0.9	4	0.67	6	1	3	8	0.856667	0.96	0.103333	0.374385	0.733957	1	23846288	23846588	AluSq	+	S	q	18	1	6	0.32	0.39	6	0.27	0.42	2298	110	0	0	301	8	156	5.32	51.83	0.4
23621	1	3	1	4	0.67	3	1	4	1	4	1	5	6	1	0.89	-0.11	0.311311	0.723448	1	23846954	23847254	AluJr	+	J	r	19	0.84	5	0.23	0.42	1	0.03	0.51	1952	173	3	0	301	6	146	3.99	48.5	0.35
23646	0.71	7	0.8	5	0.88	3	1	3	0.89	3	1	3	8	0.963333	0.796667	-0.166667	0.0349973	0.424532	1	23859196	23859470	AluSx1	-	S	x1	0	0	2	0.09	0.42	4	0.16	0.46	1911	109	62	0	275	8	150	5.82	54.55	0.39
23655	1	3	1	8	1	4	1	3	0.9	5	1	5	17	0.966667	1	0.0333333	0.339508	0.723448	1	23862794	23863091	AluYf4	+	Y	f4	22	1	3	0.15	0.4	9	0.34	0.46	2568	37	13	0	298	17	166	11.41	55.7	0.74
23672	0.8	5	0.5	4	1	8	0.74	9	0.94	6	1	5	16	0.893333	0.766667	-0.126667	0.613103	0.87761	1	23868949	23869252	AluY	-	Y	None	0	0	9	0.29	0.5	8	0.29	0.47	2469	66	3	0	304	16	170	10.53	55.92	0.68
23701	0.97	5	0.87	6	0.89	6	0.94	4	0.96	6	0.94	6	6	0.946667	0.91	-0.0366667	0.497219	0.809937	1	23878116	23878405	AluJb	+	J	b	25	0.88	7	0.23	0.5	4	0.13	0.49	1683	176	65	7	290	6	143	4.14	49.31	0.34
23705	1	8	1	7	1	3	0.96	8	1	6	0.9	4	19	0.953333	1	0.0466667	0.117926	0.521061	1	23879374	23879683	AluY	+	Y	None	30	0.87	5	0.16	0.51	9	0.26	0.52	2427	74	7	3	310	19	171	12.26	55.16	0.83
23721	1	4	0.8	5	1	4	0.6	5	1	3	1	6	14	0.866667	0.933333	0.0666667	0.840189	0.974634	1	23889714	23890004	AluSx4	-	S	x4	0	0	2	0.13	0.36	0	0	0.46	2244	79	3	0	291	14	158	9.62	54.3	0.66
23724	0.15	5	0.53	4	0.18	4	0.34	4	0.2	5	0.17	4	6	0.236667	0.286667	0.05	0.805487	0.961232	1	23891039	23891306	AluSz	-	S	z	0	0	5	0.18	0.47	8	0.3	0.46	1660	104	142	8	268	6	143	4.48	53.36	0.32
23730	1	6	0.96	6	0.67	5	0.86	6	0.92	8	1	6	13	0.926667	0.876667	-0.05	0.925147	0.999372	1	23893906	23894203	AluSz	-	S	z	0	0	17	0.52	0.52	37	0.67	0.68	2070	114	0	3	298	13	161	8.72	54.03	0.61
23759	0.7	5	0.79	4	0.83	5	0.81	4	0.91	5	0.93	5	7	0.883333	0.773333	-0.11	0.129281	0.537437	1	23909689	23909984	AluSz	+	S	z	18	0.83	4	0.17	0.44	0	0	0.41	1765	152	24	10	296	7	149	4.73	50.34	0.38
23774	0.6	5	0.88	4	1	3	0.89	3	0.83	3	0.73	5	5	0.816667	0.826667	0.01	0.522583	0.827144	1	23916036	23916307	AluJb	-	J	b	0	0	5	0.22	0.44	1	0.06	0.37	1411	161	132	12	272	5	141	3.68	51.84	0.27
23790	0.85	5	0.82	5	0.58	4	0.67	3	0.57	4	0.88	5	11	0.706667	0.75	0.0433333	0.779612	0.95164	1	23927431	23927734	AluSx1	+	S	x1	22	0.95	7	0.22	0.52	8	0.29	0.5	2240	89	0	3	304	11	163	7.24	53.62	0.51
23799	1	4	0.75	3	0.93	3	0.78	3	1	4	0.94	3	4	0.906667	0.893333	-0.0133333	0.932377	1	1	23932781	23933023	AluJr	-	J	r	0	0	9	0.3	0.5	11	0.32	0.53	1475	177	0	0	243	4	124	3.29	51.03	0.25
23848	0.56	4	0.61	7	0.83	5	0.83	3	0.93	7	0.91	7	14	0.89	0.666667	-0.223333	0.0485701	0.464284	1	23954826	23955108	AluY	-	Y	None	0	0	30	0.83	0.55	10	0.38	0.48	2166	67	50	21	283	14	155	9.89	54.77	0.67
23895	1	3	1	3	0.56	3	1	3	1	4	1	3	4	1	0.853333	-0.146667	0.307549	0.723448	1	23979978	23980104	AluSx	+	S	x	0	0	11	0.42	0.46	2	0.08	0.46	1465	100	94	18	127	4	69	6.3	54.33	0.44
23900	0.87	3	0.73	3	0.87	3	1	3	1	3	1	3	3	1	0.823333	-0.176667	0.000621572	0.119426	1	23982255	23982370	FLAM_A	+	FLAM_A	None	15	0.87	3	0.15	0.41	7	0.28	0.45	553	181	147	9	116	3	59	5.17	50.86	0.41
23917	0.87	5	0.93	5	0.39	5	1	4	0.82	4	1	3	10	0.94	0.73	-0.21	0.125494	0.532322	1	23992252	23992545	AluSz	+	S	z	12	0.83	7	0.25	0.48	7	0.43	0.36	2195	122	0	0	294	10	162	6.8	55.1	0.45
23926	0.62	3	0.88	3	0.59	3	0.92	3	0.84	3	0.78	3	3	0.846667	0.696667	-0.15	0.238375	0.680286	1	23994608	23994816	AluJb	+	J	b	29	0.79	3	0.13	0.43	6	0.23	0.46	1374	182	46	89	209	3	103	2.87	49.28	0.24
23931	0.6	5	0.6	6	0.54	6	0.87	5	0.93	5	0.7	5	8	0.833333	0.58	-0.253333	0.0429896	0.447634	1	23996039	23996334	AluJb	+	J	b	5	1	15	0.56	0.5	8	0.25	0.5	1751	186	0	30	296	8	150	5.41	50.68	0.43
23971	0.5	4	0.92	6	0.9	5	1	4	0.45	4	1	6	14	0.816667	0.773333	-0.0433333	0.392285	0.743709	1	24017625	24017930	AluSz	+	S	z	0	0	8	0.44	0.38	28	0.78	0.54	2258	84	0	7	306	14	161	9.15	52.61	0.66
23977	0.67	3	1	7	1	8	0.67	3	1	6	1	9	17	0.89	0.89	0	1	1	1	24023659	24023957	AluY	-	Y	None	0	0	4	0.19	0.41	11	0.43	0.45	2337	74	30	0	299	17	163	11.37	54.52	0.77
23978	0.72	5	1	6	0.85	5	0.75	4	1	5	0.95	5	6	0.9	0.856667	-0.0433333	0.745209	0.938303	1	24024008	24024285	AluSx1	-	S	x1	0	0	20	0.7	0.48	4	0.26	0.35	1554	119	144	36	278	6	142	4.32	51.08	0.33
24033	1	3	1	3	1	6	0.88	4	0.89	9	0.67	3	13	0.813333	1	0.186667	0.00150331	0.156477	1	24052853	24053158	AluSp	+	S	p	23	0.91	12	0.41	0.48	2	0.09	0.43	2513	78	0	0	306	13	161	8.5	52.61	0.62
24036	0.75	5	0.62	4	0.88	4	0.42	6	0.8	5	0.79	4	9	0.67	0.75	0.08	0.590578	0.865804	1	24054840	24055151	AluSx1	-	S	x1	0	0	3	0.16	0.39	2	0.07	0.46	2477	103	0	0	312	9	160	5.77	51.28	0.44
24041	0.83	3	0.85	5	0.94	4	0.82	4	0.94	4	0.67	3	9	0.81	0.873333	0.0633333	0.615831	0.878143	1	24057569	24057856	AluSc	+	S	c	8	0.75	4	0.18	0.42	13	0.48	0.48	2107	125	0	3	288	9	154	6.25	53.47	0.45
24042	0.92	10	1	6	1	6	0.86	7	0.8	5	1	4	12	0.886667	0.973333	0.0866667	0.298158	0.723448	1	24057865	24058165	AluSq2	+	S	q2	18	0.89	9	0.39	0.43	5	0.19	0.47	2241	113	0	3	301	12	159	7.97	52.82	0.58
24062	1	5	1	4	1	5	0.81	6	1	5	0.71	8	17	0.84	1	0.16	0.0761223	0.500778	1	24066730	24067003	AluY	+	Y	None	0	0	8	0.3	0.46	4	0.22	0.38	2271	62	7	7	274	17	160	12.41	58.39	0.74
24075	1	3	0.98	6	1	4	0.89	3	0.75	4	1	3	16	0.88	0.993333	0.113333	0.125018	0.53134	1	24076657	24076969	AluY	-	Y	None	0	0	7	0.48	0.35	5	0.26	0.39	2639	51	0	16	313	16	171	10.22	54.63	0.69
24081	0.93	3	1	3	1	3	1	3	1	3	0.96	3	3	0.986667	0.976667	-0.01	0.809547	0.962036	1	24081429	24081666	AluJo	-	J	o	0	0	3	0.11	0.46	7	0.32	0.42	1107	181	252	0	238	3	113	2.52	47.48	0.22
24118	1	3	1	3	1	6	1	4	0.89	3	0.75	4	6	0.88	1	0.12	0.08553	0.500778	1	24097613	24097906	AluJb	+	J	b	20	0.85	18	0.56	0.51	6	0.27	0.42	1927	157	0	3	294	6	145	4.08	49.32	0.34
24139	0.85	3	1	3	1	3	1	3	1	3	1	3	3	1	0.95	-0.05	0.326394	0.723448	1	24108939	24109094	FRAM	+	FRAM	None	9	1	7	0.31	0.42	10	0.39	0.45	627	211	51	58	156	3	76	3.85	48.72	0.33
24142	1	5	0.8	5	1	5	1	3	1	4	0.5	5	10	0.833333	0.933333	0.1	0.788183	0.955213	1	24109946	24110244	AluSz	-	S	z	0	0	15	0.78	0.39	6	0.43	0.33	2195	110	0	10	299	10	159	6.69	53.18	0.48
24146	1	3	0.4	5	0.96	6	1	6	1	6	1	3	9	1	0.786667	-0.213333	0.161256	0.582829	1	24111701	24112000	AluSx	+	S	x	18	1	4	0.22	0.38	2	0.1	0.4	2075	130	0	0	300	9	153	6	51	0.47
24150	0.25	4	0	4	0.88	4	0.8	5	0.83	5	0.88	7	15	0.836667	0.376667	-0.46	0.140152	0.553149	1	24116381	24116693	AluY	-	Y	None	0	0	2	0.09	0.43	7	0.27	0.45	2471	54	0	10	313	15	169	9.58	53.99	0.67
24199	0.63	8	0	4	0.25	4	0.3	5	0.15	4	0.36	6	14	0.27	0.293333	0.0233333	0.645597	0.893963	1	24152118	24152435	AluSx1	+	S	x1	33	0.76	34	0.67	0.65	11	0.51	0.42	1721	94	6	98	318	14	157	8.81	49.37	0.72
24200	1	6	0.75	4	0.59	9	0.71	7	0.95	7	1	6	15	0.886667	0.78	-0.106667	0.614968	0.877904	1	24152835	24153146	AluSx	-	S	x	0	0	12	0.53	0.42	10	0.47	0.41	2245	103	0	0	312	15	170	9.62	54.49	0.65
24209	1	5	0.89	6	1	6	0.8	5	1	3	0.42	6	10	0.74	0.963333	0.223333	0.253453	0.698699	1	24157297	24157589	AluSq	-	S	q	0	0	2	0.1	0.41	1	0.06	0.36	1981	96	41	14	293	10	150	6.83	51.19	0.52
24251	1	4	1	3	1	5	1	5	0.9	5	0.98	5	6	0.96	1	0.04	0.193508	0.626995	1	24185236	24185571	AluJb	-	J	b	0	0	7	0.32	0.42	12	0.54	0.43	1679	149	15	110	336	6	172	3.57	51.19	0.27
24252	1	6	1	6	0.62	4	1	7	1	6	1	5	12	1	0.873333	-0.126667	0.309397	0.723448	1	24185776	24186077	AluSx1	+	S	x1	22	0.86	6	0.27	0.42	3	0.14	0.41	2257	99	3	7	302	12	165	7.95	54.64	0.53
24268	0.05	14	0	16	0.22	13	0.08	12	0.1	12	0.17	15	16	0.116667	0.09	-0.0266667	0.387959	0.740023	1	24195092	24195329	AluJb	+	J	b	0	0	49	0.97	0.64	10	0.35	0.51	1148	133	84	55	238	16	136	13.45	57.14	0.84
24300	0.83	3	0.88	7	0.98	7	0.8	5	1	6	1	4	12	0.933333	0.896667	-0.0366667	0.406594	0.750069	1	24212088	24212379	AluSg	+	S	g	12	0.75	2	0.09	0.42	9	0.31	0.48	2211	120	0	0	292	12	161	8.22	55.14	0.55
24321	1	3	0.83	3	0.43	5	1	3	0.93	3	1	3	5	0.976667	0.753333	-0.223333	0.212725	0.650414	1	24220629	24220923	AluSq2	+	S	q2	12	1	3	0.11	0.46	3	0.12	0.44	2044	125	10	10	295	5	146	3.39	49.49	0.28
24325	1	3	0.8	5	0.5	4	0.83	3	1	4	0.8	5	12	0.876667	0.766667	-0.11	0.738801	0.936047	1	24221994	24222291	AluSc	-	S	c	0	0	5	0.2	0.45	5	0.19	0.46	2268	87	13	3	298	12	158	8.05	53.02	0.58
24374	1	3	1	5	0.81	6	0.9	5	1	3	0.33	3	9	0.743333	0.936667	0.193333	0.390472	0.741992	1	24245517	24245815	AluSc	+	S	c	24	0.75	12	0.49	0.45	19	0.69	0.48	2195	102	4	0	299	9	151	6.02	50.5	0.47
24383	1	6	0.86	8	0.65	8	0.83	9	0.88	8	0.87	9	12	0.86	0.836667	-0.0233333	0.647883	0.894654	1	24250988	24251298	AluSp	-	S	p	0	0	7	0.22	0.51	4	0.16	0.46	2225	119	10	6	311	12	165	7.72	53.05	0.56
24565	1	3	0.48	5	0.78	6	0.96	5	1	6	0.93	6	7	0.963333	0.753333	-0.21	0.302218	0.723448	1	24375311	24375606	AluJb	+	J	b	14	0.86	3	0.13	0.42	2	0.12	0.37	1808	155	3	14	296	7	157	4.73	53.04	0.34
24598	1	6	0.95	5	1	5	0.67	4	0.83	6	0.83	6	6	0.776667	0.983333	0.206667	0.00601922	0.239268	1	24401293	24401605	AluJb	+	J	b	42	0.81	2	0.05	0.55	10	0.29	0.53	1756	155	41	0	313	6	157	3.83	50.16	0.32
24637	0.92	3	0.78	3	0.71	3	0.53	3	0.72	3	0.84	3	3	0.696667	0.803333	0.106667	0.373611	0.733299	1	24432103	24432253	FRAM	+	FRAM	None	11	0.91	10	0.24	0.58	12	0.25	0.62	940	132	60	13	151	3	85	3.97	56.29	0.25
24689	1	4	0.72	4	0.74	4	1	5	0.93	3	0.97	4	5	0.966667	0.82	-0.146667	0.302521	0.723448	1	24472427	24472731	AluJo	+	J	o	26	0.73	8	0.4	0.41	8	0.25	0.51	1842	148	10	10	305	5	156	3.28	51.15	0.25
24698	0.07	5	0	4	0.22	5	0	3	0.08	4	0	4	5	0.0266667	0.0966667	0.07	0.370042	0.730023	1	24477274	24477352	AluSx1	+	S	x1	1	1	23	0.55	0.58	13	0.51	0.45	599	89	0	0	79	5	49	12.66	62.03	0.75
24712	1	7	1	4	0.9	5	1	8	0.83	9	0.93	7	9	0.92	0.966667	0.0466667	0.451273	0.780407	1	24489439	24489735	AluSx1	-	S	x1	0	0	0	0	0.36	10	0.42	0.44	1774	145	54	3	297	9	156	6.06	52.53	0.45
24736	0.92	4	1	5	1	4	0.9	5	0.88	4	0.89	3	5	0.89	0.973333	0.0833333	0.0482754	0.463899	1	24509806	24510093	AluJr	+	J	r	23	0.65	3	0.2	0.35	5	0.18	0.49	1406	194	83	21	288	5	137	3.47	47.57	0.31
24753	1	4	0.92	4	0.92	4	1	4	0.75	4	0.92	4	7	0.89	0.946667	0.0566667	0.70448	0.919887	1	24521082	24521375	AluSx	-	S	x	0	0	9	0.28	0.5	8	0.49	0.37	2027	105	54	17	294	7	147	4.76	50	0.38
24755	0.86	7	0.82	8	0.97	8	0.94	8	0.93	7	0.84	9	9	0.903333	0.883333	-0.02	0.930301	1	1	24522762	24523049	AluJb	+	J	b	16	1	25	0.52	0.62	6	0.31	0.41	1831	146	7	14	288	9	153	6.25	53.13	0.45
24759	0.17	3	0.67	5	0.76	5	0.49	6	0.73	5	0.62	5	7	0.613333	0.533333	-0.08	0.661328	0.901293	1	24525372	24525663	AluJb	-	J	b	0	0	4	0.23	0.38	9	0.3	0.49	1808	178	14	3	292	7	147	4.79	50.34	0.39
24775	0.88	4	0.92	4	0.92	4	1	3	1	4	1	4	4	1	0.906667	-0.0933333	0.00101076	0.139905	1	24535899	24536044	AluJb	+	J	b	14	0.64	4	0.15	0.46	10	0.35	0.49	1759	149	7	45	146	4	71	5.48	48.63	0.47
24786	0.8	5	0.75	4	0.77	3	0.88	4	1	4	1	5	5	0.96	0.773333	-0.186667	0.0256526	0.387478	1	24545806	24546116	AluJb	-	J	b	0	0	4	0.25	0.41	9	0.27	0.52	2070	167	0	3	311	5	159	3.22	51.13	0.25
24791	0.83	6	0.93	5	0.96	6	1	6	1	6	0.85	7	8	0.95	0.906667	-0.0433333	0.269792	0.716706	1	24549680	24549992	AluJb	+	J	b	32	0.75	5	0.23	0.41	2	0.09	0.41	2059	157	3	6	313	8	161	5.11	51.44	0.39
24794	0.64	6	1	6	0.95	7	0.96	7	1	6	0.91	7	9	0.956667	0.863333	-0.0933333	0.605534	0.873733	1	24551572	24551859	AluJo	-	J	o	0	0	6	0.15	0.57	10	0.28	0.53	1922	132	31	7	288	9	149	6.25	51.74	0.47
24796	0.88	6	0.89	7	0.88	8	1	6	0.97	5	0.64	6	9	0.87	0.883333	0.0133333	0.461215	0.784041	1	24553742	24554040	AluSg4	+	S	g4	20	0.85	5	0.29	0.38	1	0.05	0.4	2215	117	3	0	299	9	160	6.02	53.51	0.43
24798	1	6	0.83	4	1	6	1	3	1	5	1	4	9	1	0.943333	-0.0566667	0.323295	0.723448	1	24556105	24556414	AluSx1	+	S	x1	30	0.9	10	0.44	0.43	7	0.24	0.48	2340	110	7	0	310	9	162	5.81	52.26	0.43
24891	0.4	5	0.35	6	0.95	4	0.87	5	0.73	5	0.93	5	8	0.843333	0.566667	-0.276667	0.332877	0.723448	1	24616841	24617132	AluSx1	+	S	x1	13	1	9	0.29	0.5	7	0.27	0.46	1931	134	24	14	292	8	149	5.48	51.03	0.44
24910	0.25	4	0.8	5	1	5	0.67	3	0.8	5	0.92	6	7	0.796667	0.683333	-0.113333	0.942083	1	1	24629343	24629513	AluSx1	+	S	x1	17	0.82	3	0.15	0.4	12	0.45	0.46	1262	117	6	0	171	7	94	8.19	54.97	0.55
24911	0.71	7	0.83	6	0.78	6	1	3	0.89	3	0.88	5	9	0.923333	0.773333	-0.15	0.097418	0.501285	1	24629658	24629912	AluSx1	+	S	x1	15	0.87	8	0.36	0.42	12	0.37	0.51	1958	90	12	0	255	9	137	7.06	53.73	0.49
24913	0.86	3	0.87	3	0.94	3	0.94	3	0.87	3	0.81	3	3	0.873333	0.89	0.0166667	0.828205	0.969524	1	24630216	24630364	FAM	-	FAM	None	0	0	17	0.51	0.52	1	0.05	0.39	902	174	20	0	149	3	78	4.03	52.35	0.29
24925	1	3	1	3	1	3	0.8	3	0.75	4	1	3	12	0.85	1	0.15	0.0752374	0.500778	1	24639624	24639928	AluSp	+	S	p	23	1	2	0.09	0.42	0	0	0.46	2669	49	3	0	305	12	161	7.87	52.79	0.57
25032	1	4	1	3	1	5	1	4	0.75	4	1	4	6	0.916667	1	0.0833333	0.315609	0.723448	1	24709397	24709702	AluJr	-	J	r	0	0	7	0.3	0.43	2	0.11	0.39	1888	160	3	3	306	6	151	3.92	49.35	0.33
25055	1	4	0.73	4	1	3	0.89	3	0.95	4	1	4	4	0.946667	0.91	-0.0366667	0.888034	0.98889	1	24735576	24735855	AluJb	+	J	b	6	1	1	0.08	0.31	3	0.17	0.38	1823	161	29	0	280	4	146	2.86	52.14	0.21
25063	0.44	8	0.57	7	0.74	11	0.83	12	0.56	9	0.88	8	17	0.756667	0.583333	-0.173333	0.215244	0.653568	1	24741022	24741319	AluJb	-	J	b	0	0	21	0.6	0.53	19	0.65	0.48	2180	94	30	3	298	17	163	11.41	54.7	0.77
25082	0.95	4	0.97	4	0.95	4	0.88	4	1	4	0.89	4	5	0.923333	0.956667	0.0333333	0.790052	0.956336	1	24754464	24754744	AluJb	+	J	b	4	1	2	0.08	0.44	3	0.13	0.42	1746	121	29	46	281	5	150	3.56	53.38	0.25
25085	1	3	1	7	1	4	0.9	5	0.9	5	0.8	5	12	0.866667	1	0.133333	0.00091094	0.137015	1	24758632	24758916	AluSp	-	S	p	0	0	5	0.19	0.48	4	0.21	0.39	2289	84	11	0	285	12	159	8.42	55.79	0.54
25105	0.92	3	0.92	3	1	3	0.75	4	1	3	1	3	4	0.916667	0.946667	0.03	0.833268	0.97172	1	24782028	24782160	FLAM_C	+	FLAM_C	None	16	0.81	6	0.25	0.45	10	0.31	0.51	822	158	0	8	133	4	71	6.02	53.38	0.43
25114	1	5	0.83	6	1	3	1	4	1	5	0.67	6	9	0.89	0.943333	0.0533333	0.84696	0.977125	1	24788976	24789265	AluSz	+	S	z	8	1	4	0.17	0.43	6	0.3	0.4	2157	114	0	0	290	9	156	6.21	53.79	0.43
25148	1	4	0.67	4	0.89	7	0.65	7	1	5	0.98	7	12	0.876667	0.853333	-0.0233333	0.713112	0.924378	1	24812520	24812847	AluSx3	-	S	x3	0	0	8	0.27	0.48	2	0.08	0.46	2049	89	3	53	328	12	167	7.32	50.91	0.57
25149	1	3	1	4	0.89	7	1	4	0.89	9	0.38	4	11	0.756667	0.963333	0.206667	0.302019	0.723448	1	24813800	24814048	AluSg	+	S	g	23	0.83	6	0.27	0.43	6	0.23	0.49	1858	100	52	0	249	11	131	8.84	52.61	0.64
25153	0.97	5	0.77	5	0.83	3	0.79	4	1	4	0.94	4	5	0.91	0.856667	-0.0533333	0.483514	0.800797	1	24817655	24817952	AluJr4	-	J	r4	0	0	10	0.37	0.46	8	0.38	0.42	1552	201	20	20	298	5	151	3.36	50.67	0.26
25167	0.4	4	1	4	0.92	4	0.82	3	0.9	4	0.74	5	5	0.82	0.773333	-0.0466667	0.654298	0.897681	1	24828192	24828322	FLAM_A	-	FLAM_A	None	0	0	5	0.22	0.43	16	0.48	0.54	888	137	0	8	131	5	70	7.63	53.44	0.55
25168	0.83	6	0.75	4	0.83	4	0.88	4	0.6	5	0.82	5	6	0.766667	0.803333	0.0366667	0.83524	0.972477	1	24830666	24830957	AluJb	-	J	b	0	0	4	0.24	0.37	5	0.31	0.36	1808	144	75	7	292	6	155	4.11	53.08	0.3
25169	1	6	0.77	4	0.33	5	0.8	6	1	6	0.94	6	6	0.913333	0.7	-0.213333	0.47654	0.795819	1	24831723	24832007	AluJb	-	J	b	0	0	8	0.49	0.36	1	0.08	0.32	1816	137	77	0	285	6	150	4.21	52.63	0.31
25172	0.9	14	1	13	0.84	13	0.86	11	0.98	13	1	13	16	0.946667	0.91	-0.0366667	0.599212	0.869755	1	24834289	24834632	AluSq	+	S	q	28	0.82	4	0.18	0.42	3	0.12	0.46	1837	87	35	131	344	16	189	9.3	54.94	0.62
25196	0.97	4	0.92	4	1	3	1	4	1	4	0.92	4	4	0.973333	0.963333	-0.01	0.688243	0.913049	1	24852600	24852852	AluJr	-	J	r	0	0	7	0.36	0.4	5	0.4	0.32	1418	170	119	4	253	4	134	3.16	52.96	0.23
25197	0.67	3	0.91	7	1	5	0.79	6	0.96	6	0.75	6	7	0.833333	0.86	0.0266667	0.588635	0.864601	1	24853534	24853791	AluSx3	-	S	x3	0	0	4	0.38	0.29	2	0.17	0.31	1645	128	116	0	258	7	132	5.43	51.16	0.41
25211	0.5	7	0.93	10	0.75	6	0.8	5	0.9	5	0.88	8	19	0.86	0.726667	-0.133333	0.438996	0.773493	1	24864871	24865204	AluY	-	Y	None	0	0	6	0.37	0.36	0	0	0.41	2287	58	0	38	334	19	172	11.38	51.5	0.88
25258	0.83	3	0.9	5	1	3	1	3	1	4	0.81	3	8	0.936667	0.91	-0.0266667	0.568138	0.854351	1	24900620	24900909	AluSz	-	S	z	0	0	11	0.33	0.51	15	0.43	0.53	2301	86	10	0	290	8	154	5.52	53.1	0.39
25278	0.78	3	0.88	4	0.67	3	1	6	0.95	4	0.8	5	9	0.916667	0.776667	-0.14	0.127513	0.534581	1	24912972	24913268	AluSg4	+	S	g4	18	1	9	0.29	0.5	3	0.13	0.44	2281	98	7	3	297	9	157	6.06	52.86	0.44
25334	0.83	3	0.88	4	0.56	3	1	4	1	4	1	3	4	1	0.756667	-0.243333	0.00151486	0.156477	1	24944585	24944908	AluJo	+	J	o	17	0.82	0	0	0.43	8	0.26	0.5	1510	185	3	80	324	4	156	2.47	48.15	0.22
25337	1	5	0.5	4	0.8	5	1	4	0.75	4	0.81	3	7	0.853333	0.766667	-0.0866667	0.811084	0.962864	1	24946653	24946955	AluSq2	-	S	q2	0	0	4	0.19	0.41	9	0.41	0.46	2267	102	0	13	303	7	164	4.62	54.13	0.32
25338	0.94	3	0.35	4	0.62	4	0.58	4	0.69	4	0.72	5	5	0.663333	0.636667	-0.0266667	0.849443	0.977197	1	24947594	24947820	AluJb	-	J	b	0	0	6	0.26	0.46	4	0.19	0.42	1362	163	4	9	227	5	110	4.41	48.46	0.38
25342	0.83	4	0.61	3	0.17	3	0.28	3	0.65	5	0.64	5	5	0.523333	0.536667	0.0133333	0.948334	1	1	24949817	24950087	AluJo	+	J	o	12	1	17	0.59	0.48	2	0.1	0.41	1663	148	89	4	271	5	142	3.69	52.4	0.27
25344	0.9	5	0.93	7	1	6	1	4	0.8	5	0.86	7	16	0.886667	0.943333	0.0566667	0.657089	0.899413	1	24951075	24951370	AluY	-	Y	None	0	0	3	0.24	0.33	15	0.59	0.45	2324	68	3	20	296	16	166	10.81	56.08	0.71
25351	1	5	0.75	4	1	5	0.88	4	1	4	1	4	6	0.96	0.916667	-0.0433333	0.825884	0.968528	1	24953984	24954297	AluJo	-	J	o	0	0	13	0.57	0.43	5	0.24	0.41	1800	185	3	10	314	6	156	3.82	49.68	0.31
25368	0.8	5	0.92	6	0.81	6	0.75	4	0.94	4	1	5	11	0.896667	0.843333	-0.0533333	0.324329	0.723448	1	24964003	24964310	AluSz	-	S	z	0	0	5	0.25	0.41	4	0.17	0.43	2261	107	0	7	308	11	163	7.14	52.92	0.52
25376	0	5	0	5	0	5	0	4	0	5	0	5	5	0	0	0	1	1	1	24968553	24968640	AluJo	+	J	o	0	0	22	0.64	0.56	33	0.76	0.59	473	68	341	11	88	5	58	11.36	65.91	0.52
25380	0.86	4	0.94	4	0.96	4	0.58	6	0.92	5	0.6	6	8	0.7	0.92	0.22	0.0983497	0.501351	1	24975807	24976097	AluSz6	-	S	z6	0	0	6	0.34	0.38	6	0.47	0.33	1941	141	45	3	291	8	147	5.5	50.52	0.43
25390	1	3	1	4	1	5	1	6	1	5	0.86	7	9	0.953333	1	0.0466667	0.328264	0.723448	1	24988299	24988599	AluSg	+	S	g	10	0.9	3	0.21	0.34	3	0.14	0.41	1956	130	7	40	301	9	167	5.98	55.48	0.39
25400	0.87	3	0.93	3	1	3	1	3	1	3	1	3	3	1	0.933333	-0.0666667	0.0930397	0.500778	1	24996991	24997246	AluJr	-	J	r	0	0	7	0.28	0.45	0	0	0.37	1426	180	23	23	256	3	130	2.34	50.78	0.18
25413	1	5	0.8	5	1	5	1	5	1	4	0.9	5	10	0.966667	0.933333	-0.0333333	0.829106	0.969524	1	25005940	25006246	AluSq2	-	S	q2	0	0	7	0.33	0.41	4	0.18	0.43	2350	75	3	7	307	10	160	6.51	52.12	0.48
25420	0.25	4	0.94	3	0.82	3	0.85	4	0.75	6	0.5	4	8	0.7	0.67	-0.03	0.923767	0.998819	1	25009616	25009910	AluSx	+	S	x	21	0.86	7	0.33	0.41	13	0.4	0.52	2015	125	24	0	295	8	149	5.42	50.51	0.43
25422	0.89	3	1	3	0.93	5	1	3	1	3	0.92	3	7	0.973333	0.94	-0.0333333	0.447301	0.779733	1	25010839	25011160	AluSz6	+	S	z6	30	0.87	7	0.35	0.4	9	0.36	0.45	1977	124	3	34	322	7	156	4.35	48.45	0.37
25438	0.75	5	0.89	3	0.67	3	0.55	3	0.83	3	0.5	3	5	0.626667	0.77	0.143333	0.323572	0.723448	1	25016725	25016930	AluJb	+	J	b	0	0	6	0.21	0.48	10	0.32	0.5	1348	136	34	0	206	5	116	4.85	56.31	0.31
25443	0.62	4	0.76	4	1	4	0.94	4	0.98	4	0.69	4	4	0.87	0.793333	-0.0766667	0.781538	0.952497	1	25018085	25018398	AluJb	+	J	b	28	0.79	2	0.07	0.48	11	0.41	0.46	1406	166	51	60	314	4	147	2.55	46.82	0.23
25451	0.83	8	1	7	0.83	6	0.83	11	0.83	3	1	8	14	0.886667	0.886667	0	1	1	1	25021474	25021795	AluSq2	+	S	q2	24	0.79	5	0.19	0.46	4	0.15	0.47	1839	111	0	61	322	14	170	8.7	52.8	0.62
25502	1	3	0.96	3	0.95	3	0.83	6	1	5	0.93	5	10	0.92	0.97	0.05	0.51789	0.824055	1	25042421	25042726	AluSq10	+	S	q10	22	0.77	3	0.12	0.48	4	0.16	0.45	2009	109	0	3	306	10	152	6.54	49.67	0.53
25514	0.76	7	1	7	1	4	1	6	0.25	6	0.8	5	13	0.683333	0.92	0.236667	0.343571	0.723747	1	25046979	25047282	AluSc5	+	S	c5	23	0.74	9	0.2	0.6	10	0.29	0.53	2146	92	0	7	304	13	172	8.55	56.58	0.54
25530	0.7	5	0.95	7	0.88	4	0.79	6	1	7	0.67	4	9	0.82	0.843333	0.0233333	0.824006	0.968528	1	25053740	25054021	AluSq2	-	S	q2	0	0	6	0.2	0.51	7	0.25	0.47	1656	160	32	7	282	9	147	6.38	52.13	0.47
25569	0.58	9	0.65	13	0.61	8	0.56	8	0.43	9	0.55	6	15	0.513333	0.613333	0.1	0.31865	0.723448	1	25073218	25073486	AluJb	+	J	b	8	0.88	9	0.44	0.4	17	0.62	0.48	1763	123	82	4	269	15	152	11.15	56.51	0.7
25573	0.75	4	0.95	7	0.8	4	0.98	5	0.76	6	0.6	4	7	0.78	0.833333	0.0533333	0.99518	1	1	25074985	25075289	AluSz	-	S	z	0	0	3	0.16	0.38	8	0.31	0.47	2037	115	39	16	305	7	153	4.59	50.16	0.36
25574	1	3	0.5	3	1	3	0.94	4	0.33	3	0.88	4	7	0.716667	0.833333	0.116667	0.335804	0.723448	1	25075431	25075736	AluSz	+	S	z	32	0.88	8	0.3	0.46	2	0.09	0.44	2088	124	26	7	306	7	152	4.58	49.67	0.38
25578	1	5	0.83	5	1	3	1	3	0.88	5	1	4	6	0.96	0.943333	-0.0166667	0.913089	0.995096	1	25076904	25077155	AluSp	-	S	p	0	0	7	0.22	0.51	1	0.06	0.38	1457	87	312	0	252	6	121	4.76	48.02	0.42
25598	0.93	5	1	5	0.93	7	1	7	0.85	7	0.83	9	10	0.893333	0.953333	0.06	0.587348	0.863917	1	25084954	25085249	AluSx	-	S	x	0	0	4	0.2	0.41	0	0	0.27	2102	122	3	7	296	10	159	6.76	53.72	0.47
25600	0.66	6	0.6	5	0.67	6	0.6	5	0.93	5	0.8	5	7	0.776667	0.643333	-0.133333	0.230364	0.671437	1	25086158	25086460	AluJb	+	J	b	9	1	1	0.08	0.33	4	0.18	0.43	1696	148	16	56	303	7	162	4.62	53.47	0.33
25602	0.53	3	0.56	3	0.88	3	0.87	3	0.77	3	0.84	3	3	0.826667	0.656667	-0.17	0.261553	0.707612	1	25088627	25088920	AluJr4	+	J	r4	11	0.91	1	0.07	0.41	2	0.11	0.44	1667	170	17	24	294	3	141	2.04	47.96	0.18
25608	0.9	7	0.83	7	1	3	0.94	6	1	7	0.79	7	8	0.91	0.91	0	0.936872	1	1	25092501	25092793	AluSc	-	S	c	0	0	6	0.31	0.4	8	0.33	0.44	2162	102	7	10	293	8	157	5.46	53.58	0.38
25622	1	6	0.86	7	1	5	1	7	0.95	6	1	6	7	0.983333	0.953333	-0.03	0.716473	0.926173	1	25101003	25101278	AluJo	+	J	o	9	1	8	0.38	0.41	7	0.32	0.42	1725	149	54	0	276	7	148	5.07	53.62	0.37
25631	0.9	8	1	5	1	6	1	6	1	5	1	7	13	1	0.966667	-0.0333333	0.339508	0.723448	1	25108160	25108440	AluSx3	-	S	x3	0	0	9	0.29	0.5	1	0.08	0.32	2085	96	60	0	281	13	147	9.25	52.31	0.68
25639	0.95	5	1	4	1	6	0.81	6	0.93	5	0.96	5	8	0.9	0.983333	0.0833333	0.0687799	0.500778	1	25112063	25112375	AluSx1	+	S	x1	50	0.72	3	0.19	0.36	2	0.15	0.33	2390	93	6	10	313	8	159	5.11	50.8	0.4
25653	0.93	3	0.51	3	0.84	3	0.9	3	0.85	3	0.89	3	3	0.88	0.76	-0.12	0.461501	0.784117	1	25121867	25122050	FAM	+	FAM	None	26	0.85	2	0.11	0.38	15	0.54	0.47	1046	201	0	16	184	3	80	3.26	43.48	0.36
25654	0.92	4	0.9	5	1	5	1	3	1	4	1	3	13	1	0.94	-0.06	0.0893999	0.500778	1	25122065	25122358	AluSg	-	S	g	0	0	3	0.16	0.38	11	0.56	0.4	2254	105	3	0	294	13	159	8.84	54.08	0.61
25655	1	4	0.83	6	1	7	1	6	1	5	1	6	12	1	0.943333	-0.0566667	0.323295	0.723448	1	25122675	25122976	AluSx3	-	S	x3	0	0	10	0.44	0.43	3	0.2	0.34	2276	99	7	0	302	12	158	7.95	52.32	0.58
25675	1	4	0.77	5	0.97	4	1	4	1	3	1	5	6	1	0.913333	-0.0866667	0.158131	0.57914	1	25140212	25140507	AluJb	-	J	b	0	0	10	0.35	0.49	4	0.23	0.38	1875	145	24	10	296	6	158	4.05	53.38	0.29
25684	0.76	3	0.92	4	0.75	4	1	5	0.8	5	0.72	5	6	0.84	0.81	-0.03	0.529464	0.830987	1	25148026	25148376	AluJo	-	J	o	0	0	1	0.06	0.37	0	0	0.35	1826	117	6	117	351	6	182	3.42	51.85	0.26
25704	0.7	5	0.61	6	0.43	6	0.59	6	0.53	6	0.52	6	6	0.546667	0.58	0.0333333	0.750225	0.940136	1	25174281	25174399	AluJr	-	J	r	0	0	2	0.09	0.43	36	0.65	0.67	762	151	0	8	119	6	72	10.08	60.5	0.55
25710	1	3	1	4	1	5	0.76	5	0.71	4	1	3	6	0.823333	1	0.176667	0.073676	0.500778	1	25179127	25179428	AluSg	+	S	g	22	0.95	4	0.2	0.4	6	0.26	0.43	2213	129	0	0	302	6	149	3.97	49.34	0.33
25726	0.4	5	0.73	5	1	4	1	4	1	5	0.62	4	8	0.873333	0.71	-0.163333	0.432158	0.768428	1	25190307	25190607	AluSz6	-	S	z6	0	0	5	0.14	0.55	12	0.4	0.49	2185	120	0	7	301	8	156	5.32	51.83	0.4
25735	1	5	1	4	0.8	5	1	3	0.92	4	1	3	7	0.973333	0.933333	-0.04	0.771814	0.948473	1	25195365	25195657	AluSg4	+	S	g4	28	0.82	14	0.36	0.56	9	0.34	0.47	1946	91	64	8	293	7	152	4.78	51.88	0.37
25847	1	4	0.93	3	0.5	4	1	4	1	5	0.96	6	7	0.986667	0.81	-0.176667	0.222774	0.662277	1	25315899	25316215	AluJb	-	J	b	0	0	2	0.07	0.51	6	0.18	0.56	1875	158	3	31	317	7	164	4.42	51.74	0.33
25867	0.33	3	0.08	6	0.38	4	0.61	3	0.22	6	0.52	6	6	0.45	0.263333	-0.186667	0.260458	0.706357	1	25333942	25334235	AluJb	-	J	b	0	0	9	0.29	0.52	13	0.43	0.5	1809	177	34	0	294	6	158	4.08	53.74	0.28
25868	0	4	0.58	4	0.24	6	0.83	6	0.3	5	0.67	4	10	0.6	0.273333	-0.326667	0.16558	0.588609	1	25334245	25334535	AluSc	-	S	c	0	0	8	0.25	0.51	4	0.12	0.52	2015	102	11	0	291	10	148	6.87	50.86	0.54
25949	0.8	5	0.71	7	0.71	4	1	3	0.67	3	0.33	3	9	0.666667	0.74	0.0733333	0.749601	0.939805	1	25401866	25402144	AluSx	+	S	x	0	0	7	0.27	0.46	6	0.28	0.42	2139	100	11	0	279	9	160	6.45	57.35	0.4
26005	0.5	3	0.75	4	0.89	3	1	3	0.94	3	1	3	10	0.98	0.713333	-0.266667	0.0135539	0.315441	1	25453406	25453703	AluSz6	+	S	z6	14	0.86	4	0.16	0.45	9	0.36	0.45	2199	121	0	7	298	10	152	6.71	51.01	0.52
26042	1	3	1	3	0.62	4	0.92	3	0.83	3	1	3	5	0.916667	0.873333	-0.0433333	0.816016	0.965137	1	25482288	25482601	AluJb	+	J	b	34	0.79	9	0.41	0.42	1	0.09	0.3	1904	137	29	35	314	5	156	3.18	49.68	0.26
26058	1	4	1	4	0.75	4	1	4	0.59	6	0.89	4	6	0.826667	0.916667	0.09	0.498846	0.811094	1	25498498	25498795	AluJo	+	J	o	16	0.81	9	0.3	0.49	1	0.06	0.37	1924	158	3	0	298	6	159	4.03	53.36	0.28
26080	1	4	0.86	7	0.72	6	1	3	0.72	8	0.83	6	13	0.85	0.86	0.01	0.958089	1	1	25514756	25515074	AluSx	+	S	x	38	0.76	3	0.13	0.43	2	0.12	0.37	2172	113	3	28	319	13	171	8.15	53.61	0.57
26086	1	6	0.93	7	1	5	1	6	1	6	0.78	6	11	0.926667	0.976667	0.05	0.718937	0.927543	1	25518261	25518553	AluSx3	+	S	x3	16	0.88	8	0.23	0.52	5	0.16	0.5	2095	113	17	7	293	11	160	7.51	54.61	0.5
26099	0.83	3	1	3	0.67	4	0.97	4	1	4	0.83	3	5	0.933333	0.833333	-0.1	0.508284	0.817321	1	25529950	25530250	AluSx	+	S	x	30	0.83	6	0.23	0.45	2	0.1	0.4	2073	149	36	0	301	5	145	3.32	48.17	0.29
26105	0.88	4	1	6	0.86	7	1	3	1	7	1	3	10	1	0.913333	-0.0866667	0.0815571	0.500778	1	25533870	25534177	AluSz	+	S	z	23	0.91	7	0.26	0.47	6	0.19	0.51	2255	117	0	10	308	10	164	6.49	53.25	0.46
26114	0.95	4	0.9	5	0.84	5	0.86	4	1	5	0.81	5	5	0.89	0.896667	0.00666667	0.729279	0.93074	1	25540625	25540921	AluJr	+	J	r	21	0.95	8	0.31	0.45	27	0.81	0.52	1665	175	47	24	297	5	146	3.37	49.16	0.29
26116	1	4	0.8	5	0.8	5	1	5	0.97	5	0.88	5	7	0.95	0.866667	-0.0833333	0.475036	0.794961	1	25541435	25541743	AluSx3	+	S	x3	28	1	25	0.79	0.5	6	0.24	0.46	2164	91	3	42	309	7	157	4.53	50.81	0.35
26122	1	6	0.89	6	1	5	1	5	0.96	6	0.8	5	9	0.92	0.963333	0.0433333	0.554191	0.846159	1	25546283	25546582	AluSx	-	S	x	0	0	2	0.08	0.47	7	0.29	0.44	2187	110	10	13	300	9	160	6	53.33	0.42
26126	1	6	1	3	1	5	0.75	4	0.67	3	0.75	4	6	0.723333	1	0.276667	9.33797e-05	0.100154	1	25548423	25548714	AluSx1	-	S	x1	0	0	4	0.23	0.38	1	0.11	0.28	2119	137	0	3	292	6	148	4.11	50.68	0.33
26142	1	3	1	7	1	7	1	6	1	7	0.92	6	16	0.973333	1	0.0266667	0.349605	0.723747	1	25557311	25557596	AluY	-	Y	None	0	0	7	0.31	0.43	1	0.05	0.42	2344	56	52	0	286	16	157	11.19	54.9	0.75
26149	0.81	6	0.92	5	0.96	5	0.96	4	0.98	5	0.83	4	7	0.923333	0.896667	-0.0266667	0.535718	0.834744	1	25562871	25563143	AluJb	+	J	b	17	1	13	0.56	0.43	9	0.42	0.42	1847	136	81	0	273	7	152	5.13	55.68	0.33
26153	1	4	0.92	4	0.94	4	0.96	4	0.88	4	1	4	4	0.946667	0.953333	0.00666667	0.993596	1	1	25565266	25565589	AluJo	-	J	o	0	0	2	0.12	0.38	15	0.59	0.45	1772	142	19	62	324	4	170	2.47	52.47	0.18
26155	0	4	0	4	0	4	0	4	0	4	0	4	4	0	0	0	1	1	1	25566144	25566241	FRAM	-	FRAM	None	0	0	15	0.53	0.48	35	0.73	0.63	302	163	124	28	98	4	52	8.16	53.06	0.58
26156	1	4	0.77	4	0.88	4	0.54	4	0.72	4	0.83	4	4	0.696667	0.883333	0.186667	0.146233	0.561354	1	25567111	25567371	AluJr4	+	J	r4	10	0.9	16	0.67	0.44	12	0.39	0.5	958	192	153	31	261	4	138	3.07	52.87	0.22
26162	0.53	3	0.47	3	0.87	3	0.65	4	0.83	3	0.93	3	4	0.803333	0.623333	-0.18	0.281382	0.723448	1	25571188	25571451	AluJb	-	J	b	0	0	3	0.22	0.33	4	0.27	0.34	1618	155	91	0	264	4	139	3.03	52.65	0.22
26163	0	4	0.12	6	0.37	6	0	6	0.14	7	0.28	8	9	0.14	0.163333	0.0233333	0.958234	1	1	25572392	25572542	AluSz6	-	S	z6	0	0	5	0.33	0.35	12	0.56	0.43	895	106	33	40	151	9	93	11.92	61.59	0.65
26164	0.43	5	0.88	5	0.69	4	0.46	6	0.94	4	0.45	6	7	0.616667	0.666667	0.05	0.971325	1	1	25574841	25575100	AluJo	-	J	o	0	0	21	0.63	0.52	13	0.48	0.47	1504	138	165	0	260	7	138	5.38	53.08	0.39
26165	0.94	6	0.85	6	0.88	4	1	3	1	5	0.97	6	11	0.99	0.89	-0.1	0.0100007	0.285842	1	25575358	25575648	AluSq	+	S	q	7	0.86	10	0.35	0.48	10	0.42	0.44	2215	113	0	0	291	11	156	7.56	53.61	0.53
26166	1	4	1	3	1	5	1	3	1	3	1	4	7	1	1	0	1	1	1	25575837	25576131	AluSz	-	S	z	0	0	15	0.58	0.46	10	0.52	0.39	2089	115	7	14	295	7	150	4.75	50.85	0.37
26173	1	6	0.9	13	1	6	0.89	9	0.94	9	1	11	17	0.943333	0.966667	0.0233333	0.54139	0.838512	1	25579852	25580150	AluSp	-	S	p	0	0	8	0.36	0.42	3	0.12	0.45	2283	77	43	0	299	17	161	11.37	53.85	0.79
26300	0.94	4	0.77	4	0.86	6	0.96	4	0.88	4	0.85	6	6	0.896667	0.856667	-0.04	0.578475	0.858757	1	25668191	25668481	AluJb	-	J	b	0	0	25	0.77	0.51	2	0.16	0.32	1664	148	0	55	291	6	150	4.12	51.55	0.31
26319	1	5	1	4	1	5	0.85	5	1	4	1	5	6	0.95	1	0.05	0.326394	0.723448	1	25680845	25681132	AluJr	+	J	r	30	0.83	3	0.16	0.39	6	0.29	0.41	1734	184	3	0	288	6	140	4.17	48.61	0.36
26443	0.93	7	0.83	8	0.97	7	0.83	6	0.91	8	0.88	8	8	0.873333	0.91	0.0366667	0.373622	0.733299	1	25763628	25763943	AluJo	-	J	o	0	0	3	0.16	0.39	7	0.28	0.45	1596	180	0	70	316	8	145	5.06	45.89	0.48
26478	1	4	0.93	3	0.95	4	1	3	0.8	5	0.75	6	8	0.85	0.96	0.11	0.41389	0.75524	1	25793468	25793768	AluSz	+	S	z	20	0.9	6	0.33	0.38	3	0.2	0.35	2180	133	3	0	301	8	152	5.32	50.5	0.42
26481	1	6	1	5	1	3	1	7	1	4	1	4	13	1	1	0	1	1	1	25796125	25796416	AluSx3	-	S	x3	0	0	2	0.14	0.34	0	0	0.37	2342	82	34	0	292	13	160	8.9	54.79	0.6
26515	0.91	5	0.9	5	0.64	5	0.98	5	0.85	5	0.96	5	5	0.93	0.816667	-0.113333	0.177569	0.606895	1	25845511	25845812	AluJr4	-	J	r4	0	0	14	0.43	0.52	2	0.08	0.45	1662	182	17	33	302	5	150	3.31	49.67	0.27
26549	0.79	7	1	5	0.7	5	0.71	7	1	4	0.67	6	17	0.793333	0.83	0.0366667	0.905264	0.99435	1	25866998	25867305	AluSp	-	S	p	0	0	5	0.19	0.46	9	0.22	0.57	2445	81	16	0	308	17	169	11.04	54.87	0.74
26574	0.94	4	1	3	0.71	4	0.93	3	1	4	0.75	4	6	0.893333	0.883333	-0.01	0.992536	1	1	25880061	25880280	AluSz	+	S	z	19	1	8	0.27	0.49	11	0.23	0.62	1287	100	368	0	220	6	119	5.45	54.09	0.38
26619	1	5	0.95	4	0.71	7	0.83	6	0.7	5	0.97	5	8	0.833333	0.886667	0.0533333	0.50697	0.816107	1	25917788	25918094	AluSx	-	S	x	0	0	14	0.45	0.5	6	0.28	0.42	2086	104	39	26	307	8	153	5.21	49.84	0.42
26621	0.9	6	0.86	7	0.92	6	1	7	0.94	8	0.91	8	8	0.95	0.893333	-0.0566667	0.185452	0.617651	1	25918547	25918858	AluJb	-	J	b	0	0	8	0.32	0.45	25	0.73	0.53	2019	144	16	16	312	8	162	5.13	51.92	0.38
26622	1	4	0.75	4	0.62	4	0.92	4	0.88	4	0.94	4	17	0.913333	0.79	-0.123333	0.784371	0.953772	1	25918860	25919159	AluSc8	-	S	c8	0	0	11	0.35	0.51	22	0.58	0.55	2362	83	0	7	300	17	165	11.33	55	0.77
26626	0.89	3	0.89	3	0.5	3	1	3	0.95	3	1	3	6	0.983333	0.76	-0.223333	0.0217275	0.36805	1	25922389	25922695	AluSz	-	S	z	0	0	2	0.08	0.46	3	0.12	0.45	2066	166	0	0	307	6	153	3.91	49.84	0.32
26635	0.58	4	0.38	3	0.31	6	0.38	4	0.75	6	0.7	5	7	0.61	0.423333	-0.186667	0.239586	0.681474	1	25927261	25927584	AluSz	-	S	z	0	0	4	0.22	0.38	2	0.08	0.47	2106	111	3	68	324	7	158	4.32	48.77	0.37
26654	0.69	7	0.81	7	1	5	0.88	8	0.8	5	1	6	12	0.893333	0.833333	-0.06	0.791527	0.956775	1	25948104	25948419	AluSx1	-	S	x1	0	0	5	0.2	0.46	2	0.07	0.49	2250	104	6	22	316	12	170	7.59	53.8	0.53
26664	1	5	0.9	7	0.58	6	0.57	6	0.69	8	1	6	8	0.753333	0.826667	0.0733333	0.777173	0.950535	1	25958307	25958568	AluSz	-	S	z	0	0	3	0.21	0.34	2	0.15	0.32	1767	130	4	30	262	8	142	6.11	54.2	0.42
26673	0.95	8	1	6	0.68	9	0.98	6	1	5	0.97	6	10	0.983333	0.876667	-0.106667	0.292488	0.723448	1	25971011	25971312	AluJb	-	J	b	0	0	7	0.3	0.47	5	0.13	0.55	1935	136	26	13	302	10	160	6.62	52.98	0.48
26684	1	4	0.5	5	1	5	0.83	3	0.83	6	0.9	5	7	0.853333	0.833333	-0.02	0.390975	0.742648	1	25984949	25985245	AluJb	-	J	b	0	0	2	0.05	0.54	10	0.25	0.57	1797	168	0	14	297	7	154	4.71	51.85	0.36
26714	0.9	4	0.6	4	0.48	3	0.77	4	0.79	3	0.69	4	4	0.75	0.66	-0.09	0.712595	0.92405	1	26013486	26013627	FLAM_A	+	FLAM_A	None	27	0.67	11	0.4	0.48	6	0.15	0.56	716	232	0	0	142	4	79	5.63	55.63	0.37
26748	1	4	0.88	4	0.33	3	1	4	1	4	0.94	4	5	0.98	0.736667	-0.243333	0.218896	0.658039	1	26042829	26043105	AluJb	-	J	b	0	0	5	0.2	0.45	3	0.17	0.38	1628	177	76	11	277	5	148	3.61	53.43	0.26
26776	0.71	6	0.94	7	0.9	6	0.95	6	0.94	6	0.97	6	9	0.953333	0.85	-0.103333	0.123214	0.527901	1	26061622	26061913	AluSz6	+	S	z6	4	1	6	0.22	0.48	2	0.1	0.4	1973	127	0	20	292	9	162	6.16	55.48	0.4
26816	0.94	3	1	5	0.91	5	1	4	0.67	6	0.93	5	11	0.866667	0.95	0.0833333	0.637383	0.889691	1	26091299	26091554	AluSg	+	S	g	16	0.88	9	0.31	0.48	3	0.08	0.54	2067	86	0	0	256	11	143	8.59	55.86	0.55
26832	1	4	1	6	0.97	6	0.88	4	1	6	0.97	5	6	0.95	0.99	0.04	0.321629	0.723448	1	26108372	26108587	AluJb	+	J	b	12	0.92	12	0.27	0.61	5	0.13	0.56	1322	167	0	23	216	6	108	5.56	50	0.45
26858	0.89	9	0.97	5	1	5	1	4	0.93	4	1	4	15	0.976667	0.953333	-0.0233333	0.578031	0.858622	1	26133307	26133629	AluY	-	Y	None	0	0	6	0.15	0.6	8	0.22	0.55	2357	65	0	56	323	15	172	9.29	53.25	0.66
26881	0.89	3	0.67	3	0.88	4	1	3	1	4	0.67	3	5	0.89	0.813333	-0.0766667	0.217944	0.657225	1	26159992	26160280	AluJr	+	J	r	36	0.78	5	0.2	0.45	0	0	0.38	1593	138	114	35	289	5	136	3.46	47.06	0.31
26893	1	4	1	4	1	5	1	3	1	4	1	3	6	1	1	0	1	1	1	26172934	26173214	AluSx1	+	S	x1	6	1	9	0.34	0.46	2	0.11	0.38	2032	132	21	0	281	6	148	4.27	52.67	0.31
26894	1	7	0.83	6	0.93	7	0.89	7	1	6	0.8	5	8	0.896667	0.92	0.0233333	0.851108	0.977386	1	26173748	26174055	AluSz	-	S	z	0	0	2	0.12	0.37	6	0.25	0.44	2195	123	3	13	308	8	149	5.19	48.38	0.45
26901	1	5	1	5	0.92	6	1	4	1	4	1	5	7	1	0.973333	-0.0266667	0.349605	0.723747	1	26179807	26180114	AluSx1	+	S	x1	29	0.83	1	0.1	0.29	8	0.29	0.47	2132	133	10	0	308	7	156	4.55	50.65	0.36
26902	0.5	3	0.61	3	0.66	3	0.8	5	0.68	4	0.67	3	6	0.716667	0.59	-0.126667	0.221989	0.661497	1	26180425	26180730	AluSx	+	S	x	30	0.8	5	0.2	0.45	1	0.05	0.4	2157	131	20	0	306	6	148	3.92	48.37	0.34
26907	0.69	7	0.85	8	0.85	8	0.81	6	0.93	7	0.91	8	10	0.883333	0.796667	-0.0866667	0.235719	0.677538	1	26183317	26183612	AluJb	+	J	b	4	1	8	0.29	0.47	16	0.6	0.46	1782	152	3	34	296	10	161	6.76	54.39	0.46
26918	0.72	4	0.7	4	0.88	4	0.6	5	0.91	4	0.7	5	11	0.736667	0.766667	0.03	0.918302	0.996533	1	26188224	26188533	AluSp	+	S	p	30	1	3	0.12	0.48	3	0.08	0.53	2510	71	13	3	310	11	158	7.1	50.97	0.55
26920	1	6	1	6	1	3	0.83	6	1	4	0.94	6	12	0.923333	1	0.0766667	0.101977	0.503913	1	26191366	26191666	AluYf4	+	Y	f4	31	0.87	4	0.13	0.51	16	0.5	0.51	2424	66	33	0	301	12	167	7.97	55.48	0.52
26936	1	4	1	5	0.75	4	1	4	0.94	4	1	4	5	0.98	0.916667	-0.0633333	0.658414	0.899652	1	26199001	26199301	AluJb	-	J	b	0	0	6	0.19	0.51	3	0.12	0.45	1951	139	27	10	301	5	148	3.32	49.17	0.28
26944	0.95	7	0.71	8	0.95	7	1	4	1	8	0.73	6	10	0.91	0.87	-0.04	0.396224	0.746765	1	26204580	26204877	AluSc	+	S	c	19	1	9	0.33	0.46	5	0.17	0.48	2418	91	0	0	298	10	155	6.71	52.01	0.5
26955	0.49	9	0.96	9	0.76	9	0.61	8	0.88	8	0.93	8	12	0.806667	0.736667	-0.07	0.820546	0.967353	1	26209959	26210255	AluY	-	Y	None	0	0	11	0.38	0.48	6	0.29	0.4	2297	81	0	27	297	12	166	8.08	55.89	0.53
26956	0.8	5	1	5	0.93	5	0.95	5	0.91	5	1	5	5	0.953333	0.91	-0.0433333	0.698291	0.917717	1	26210332	26210598	AluJr	+	J	r	26	0.77	17	0.61	0.47	13	0.47	0.47	1407	175	17	4	267	5	129	3.75	48.31	0.33
26993	0.67	3	0.95	5	0.6	5	0.89	3	0.2	3	0.9	4	13	0.663333	0.74	0.0766667	0.772157	0.948588	1	26240105	26240427	AluSp	-	S	p	0	0	0	0	0.42	1	0.03	0.5	2402	81	3	34	323	13	164	8.05	50.77	0.63
27014	0.96	5	0.93	5	0.88	4	0.8	5	0.83	3	1	5	5	0.876667	0.923333	0.0466667	0.951533	1	1	26254698	26254859	FRAM	+	FRAM	None	33	0.67	2	0.06	0.51	4	0.14	0.48	562	225	74	68	162	5	82	6.17	50.62	0.48
27018	0.92	4	0.56	3	0.88	4	1	4	0.75	3	1	4	4	0.916667	0.786667	-0.13	0.175523	0.603588	1	26256567	26256888	AluJo	+	J	o	20	0.85	3	0.09	0.53	3	0.12	0.46	1519	183	6	81	322	4	157	2.48	48.76	0.21
27027	0.5	6	0.48	4	0.25	4	0.38	4	0.74	4	0.73	3	10	0.616667	0.41	-0.206667	0.201131	0.635621	1	26262823	26263124	AluSz	+	S	z	17	0.82	5	0.21	0.44	6	0.19	0.5	2239	99	3	13	302	10	164	6.62	54.3	0.45
27069	0.83	5	1	5	0.57	7	0.7	6	0.95	7	0.8	7	7	0.816667	0.8	-0.0166667	0.747947	0.939504	1	26283234	26283401	AluJb	+	J	b	23	0.78	1	0.04	0.43	7	0.22	0.51	1097	143	30	0	168	7	95	8.33	56.55	0.54
27086	1	4	1	4	1	4	1	4	1	4	1	4	7	1	1	0	1	1	1	26296676	26296991	AluSz	+	S	z	23	0.83	6	0.24	0.45	8	0.26	0.49	2154	92	0	38	316	7	169	4.43	53.48	0.31
27104	0.89	3	1	4	1	4	1	3	0.93	3	1	3	5	0.976667	0.963333	-0.0133333	0.871812	0.984405	1	26309600	26309898	AluJo	+	J	o	23	0.91	0	0	0.45	3	0.13	0.44	1912	154	23	3	299	5	151	3.34	50.5	0.27
27112	0.89	3	1	3	1	3	1	3	1	4	1	4	4	1	0.963333	-0.0366667	0.335911	0.723448	1	26313941	26314014	AluSg4	+	S	g4	0	0	8	0.34	0.44	6	0.25	0.44	522	95	0	14	74	4	50	10.81	67.57	0.48
27140	1	5	0.65	5	0.68	6	0.96	6	0.79	6	0.68	6	6	0.81	0.776667	-0.0333333	0.864527	0.982157	1	26329721	26330022	AluJr	+	J	r	21	0.81	11	0.38	0.48	2	0.08	0.45	1806	176	7	13	302	6	146	3.97	48.34	0.35
27166	1	3	0.95	4	0.94	4	1	3	0.96	4	1	5	10	0.986667	0.963333	-0.0233333	0.381504	0.735821	1	26341368	26341678	AluSq2	+	S	q2	34	0.76	0	0	0.4	2	0.07	0.48	2359	103	3	0	311	10	160	6.43	51.45	0.5
27249	0.92	3	0.87	3	0.83	3	1	3	1	3	0.89	3	3	0.963333	0.873333	-0.09	0.0770791	0.500778	1	26397883	26398179	AluJb	+	J	b	12	0.92	7	0.3	0.46	11	0.39	0.48	2060	141	3	14	297	3	150	2.02	50.51	0.16
27277	1	4	1	6	0.75	4	0.86	5	0.83	6	0.83	6	8	0.84	0.916667	0.0766667	0.150543	0.566487	1	26411101	26411414	AluJb	+	J	b	29	0.76	1	0.03	0.49	5	0.19	0.47	1971	185	0	6	314	8	167	5.1	53.18	0.37
27295	0.56	3	0.88	4	0.62	4	0.88	4	0.82	4	0.88	7	11	0.86	0.686667	-0.173333	0.17457	0.601858	1	26419204	26419506	AluSx	+	S	x	25	0.8	5	0.24	0.41	4	0.22	0.38	2188	107	4	0	303	11	160	7.26	52.81	0.52
27310	1	3	0.75	4	1	4	0.65	4	0.81	5	0.48	4	8	0.646667	0.916667	0.27	0.0527119	0.476009	1	26430672	26430976	AluSx1	+	S	x1	2	1	4	0.15	0.46	3	0.14	0.42	2071	98	0	75	305	8	172	5.25	56.39	0.33
27371	0.93	5	0.82	7	1	4	0.86	7	1	6	1	4	7	0.953333	0.916667	-0.0366667	0.534108	0.833906	1	26470100	26470401	AluJb	+	J	b	22	0.82	3	0.19	0.35	7	0.31	0.43	1928	166	7	0	302	7	160	4.64	52.98	0.33
27387	0.69	3	0.62	4	0.56	3	0.9	4	0.67	4	0.96	3	4	0.843333	0.623333	-0.22	0.0828691	0.500778	1	26480017	26480313	AluJr	-	J	r	0	0	1	0.06	0.36	3	0.12	0.46	1747	165	7	20	297	4	154	2.69	51.85	0.2
27394	0.83	4	0.33	3	0.5	5	0.5	4	1	6	0.95	4	9	0.816667	0.553333	-0.263333	0.152159	0.569288	1	26483939	26484195	AluSg	+	S	g	0	0	11	0.36	0.5	5	0.17	0.49	1902	105	35	0	257	9	144	7	56.03	0.45
27416	0.95	7	0.92	5	1	6	1	4	0.94	6	0.94	8	15	0.96	0.956667	-0.00333333	0.964752	1	1	26502148	26502429	AluY	-	Y	None	0	0	4	0.22	0.38	11	0.4	0.47	2302	60	64	0	282	15	152	10.64	53.9	0.74
27417	0.83	3	1	3	0.88	3	1	3	0.92	3	0.97	3	3	0.963333	0.903333	-0.06	0.478382	0.796991	1	26502612	26502743	FLAM_A	-	FLAM_A	None	0	0	18	0.64	0.48	10	0.37	0.46	633	174	8	68	132	3	71	4.55	53.79	0.32
27421	0.5	4	0	3	0.4	5	0.3	5	1	3	0.5	4	8	0.6	0.3	-0.3	0.190423	0.624334	1	26504185	26504479	AluSx1	+	S	x1	23	0.87	22	0.46	0.63	7	0.17	0.57	2178	108	34	0	295	8	152	5.42	51.53	0.42
27434	1	5	1	4	1	3	1	4	0.88	4	0.8	5	9	0.893333	1	0.106667	0.0817681	0.500778	1	26512960	26513264	AluSx3	-	S	x3	0	0	2	0.07	0.5	2	0.06	0.51	2340	108	0	0	305	9	161	5.9	52.79	0.43
27437	1	4	0.97	4	1	4	1	4	1	4	1	4	4	1	0.99	-0.01	0.455388	0.780407	1	26514416	26514551	FLAM_C	-	FLAM_C	None	0	0	8	0.25	0.51	10	0.24	0.57	613	203	29	59	136	4	70	5.88	51.47	0.45
27530	1	4	1	3	1	3	1	3	1	3	0.92	4	10	0.973333	1	0.0266667	0.349605	0.723747	1	26570209	26570508	AluSg7	+	S	g7	26	1	0	0	0.4	9	0.39	0.43	2477	67	17	0	300	10	154	6.67	51.33	0.51
27587	0.92	4	0.95	4	0.88	4	0.88	4	0.71	4	0.35	4	5	0.646667	0.916667	0.27	0.0730892	0.500778	1	26614398	26614611	AluJr	-	J	r	0	0	3	0.09	0.52	5	0.14	0.55	1098	206	9	19	214	5	104	4.67	48.6	0.41
27607	1	6	0.81	8	1	8	0.83	7	0.96	7	1	6	11	0.93	0.936667	0.00666667	0.738483	0.935929	1	26628580	26628882	AluSc8	+	S	c8	29	1	9	0.24	0.55	4	0.14	0.49	2293	79	33	7	303	11	150	7.26	49.5	0.6
27609	0.71	5	0.75	4	0.58	5	0.8	5	0.87	6	0.66	7	9	0.776667	0.68	-0.0966667	0.319901	0.723448	1	26629877	26630144	AluSq2	+	S	q2	23	0.96	3	0.08	0.54	6	0.21	0.48	1854	112	4	22	268	9	135	6.72	50.37	0.54
27618	0.75	4	0.48	4	0.89	3	0.56	4	1	3	0.67	4	4	0.743333	0.706667	-0.0366667	0.569915	0.855765	1	26634187	26634383	AluJb	-	J	b	0	0	6	0.28	0.41	15	0.54	0.48	1224	162	0	5	197	4	109	4.06	55.33	0.28
27632	0.83	6	0.86	6	0.75	4	0.9	5	0.92	5	1	3	12	0.94	0.813333	-0.126667	0.086925	0.500778	1	26640265	26640570	AluY	-	Y	None	0	0	1	0.06	0.4	1	0.05	0.4	2416	95	0	0	306	12	158	7.84	51.63	0.59
27642	0.5	8	0.67	9	0.53	6	0.8	9	0.61	15	0.67	9	20	0.693333	0.566667	-0.126667	0.259583	0.705183	1	26645663	26645969	AluY	+	Y	None	14	1	10	0.29	0.53	14	0.41	0.53	2302	62	3	39	307	20	177	13.03	57.65	0.8
27652	1	3	0.67	3	0.58	4	1	4	0.75	4	0.56	3	11	0.77	0.75	-0.02	0.953034	1	1	26651767	26652082	AluSx	+	S	x	32	0.75	6	0.28	0.42	5	0.18	0.48	2334	98	0	13	316	11	163	6.96	51.58	0.53
27653	0.67	3	0.97	5	0.9	3	0.9	5	0.86	4	0.75	6	7	0.836667	0.846667	0.01	0.622722	0.88148	1	26652401	26652682	AluJo	-	J	o	0	0	6	0.22	0.47	8	0.36	0.43	1927	106	50	14	282	7	152	4.96	53.9	0.35
27710	0.82	8	0.52	8	0.68	8	0.81	6	0.62	8	0.64	8	8	0.69	0.673333	-0.0166667	0.924846	0.99929	1	26689979	26690247	AluJr	+	J	r	25	0.84	7	0.18	0.56	15	0.45	0.51	1270	216	123	0	269	8	134	5.95	49.81	0.5
27741	1	4	0	3	0.25	4	0.8	5	0.73	5	1	5	7	0.843333	0.416667	-0.426667	0.330427	0.723448	1	26708041	26708335	AluSq2	+	S	q2	26	0.81	7	0.35	0.4	6	0.26	0.43	2145	115	48	0	295	7	150	4.75	50.85	0.37
27782	0.67	4	0.89	3	0.75	4	0.33	6	0.66	6	1	3	10	0.663333	0.77	0.106667	0.885954	0.988648	1	26726451	26726741	AluY	-	Y	None	0	0	8	1.03	0.25	3	0.14	0.43	2257	89	0	10	291	10	157	6.87	53.95	0.49
27793	0.98	7	1	3	1	3	0.86	7	1	3	1	3	15	0.953333	0.993333	0.04	0.467345	0.7887	1	26731526	26731831	AluY	+	Y	None	27	0.89	1	0.06	0.38	6	0.26	0.43	2526	69	3	0	306	15	165	9.8	53.92	0.69
27799	0.83	3	0.44	5	0.7	5	0.94	4	1	7	0.9	5	8	0.946667	0.656667	-0.29	0.0300514	0.406056	1	26734434	26734711	AluJr	-	J	r	0	0	5	0.23	0.42	16	0.51	0.5	1801	140	40	14	278	8	153	5.76	55.04	0.39
27813	0.97	5	0.77	6	0.45	6	0.95	6	1	5	0.93	6	6	0.96	0.73	-0.23	0.147049	0.561714	1	26749564	26749836	AluSz6	-	S	z6	0	0	3	0.16	0.39	13	0.53	0.44	1677	143	48	18	273	6	146	4.4	53.48	0.31
27825	0.85	5	1	5	0.5	6	0.86	7	0.79	7	0.96	6	15	0.87	0.783333	-0.0866667	0.997741	1	1	26757331	26757642	AluSc	+	S	c	31	0.77	1	0.06	0.35	17	0.69	0.45	2250	75	0	4	312	15	159	9.62	50.96	0.74
27826	0.5	5	0.93	5	0.4	5	0.89	5	0.67	7	0.12	4	18	0.56	0.61	0.05	0.74661	0.939045	1	26757870	26758173	AluSq	-	S	q	0	0	13	0.61	0.41	31	0.89	0.53	2491	66	0	3	304	18	171	11.84	56.25	0.76
27827	1	5	0.8	4	0.73	5	0.82	5	1	4	0.93	4	5	0.916667	0.843333	-0.0733333	0.673926	0.907425	1	26759860	26760142	AluJo	+	J	o	8	1	2	0.11	0.39	5	0.23	0.42	1814	156	21	0	283	5	148	3.53	52.3	0.26
27836	0.78	5	0.96	4	0.62	4	0.92	4	1	4	0.94	4	5	0.953333	0.786667	-0.166667	0.146643	0.561507	1	26762607	26762892	AluJb	+	J	b	0	0	9	0.28	0.51	18	0.58	0.5	1399	199	9	85	286	5	142	3.5	49.65	0.28
27840	0.86	7	1	4	0.75	4	0.83	4	0.86	6	0.8	5	12	0.83	0.87	0.04	0.393891	0.74511	1	26763380	26763680	AluY	+	Y	None	20	0.85	16	0.54	0.49	10	0.39	0.46	2441	80	0	0	301	12	167	7.97	55.48	0.52
27869	1	3	0.88	4	0.96	5	1	4	1	3	1	4	10	1	0.946667	-0.0533333	0.120218	0.523583	1	26776059	26776348	AluSx	-	S	x	0	0	11	0.37	0.49	4	0.16	0.45	2339	86	7	0	290	10	161	6.9	55.52	0.45
27898	1	5	0.89	3	1	4	0.75	6	0.9	5	0.92	6	10	0.856667	0.963333	0.106667	0.0817939	0.500778	1	26790484	26790783	AluSx	-	S	x	0	0	12	0.44	0.47	0	0	0.44	2360	93	20	0	300	10	152	6.67	50.67	0.53
27922	1	7	1	6	1	6	1	6	0.98	6	1	6	7	0.993333	0.996667	0.00333333	0.573798	0.856284	1	26808952	26809247	AluJr	-	J	r	0	0	9	0.28	0.51	2	0.11	0.4	1591	182	36	7	296	7	147	4.73	49.66	0.38
27960	0.75	4	0.88	4	1	4	0.82	4	0.79	4	1	4	4	0.87	0.876667	0.00666667	0.95204	1	1	26826425	26826528	FLAM_C	+	FLAM_C	None	15	0.87	14	0.44	0.5	40	0.69	0.68	352	125	365	87	104	4	51	7.69	49.04	0.64
27962	0.38	4	0.81	4	0.95	4	0.65	4	0.53	4	0.72	4	4	0.633333	0.713333	0.08	0.463516	0.785977	1	26828665	26828938	AluJr	+	J	r	6	0.83	13	0.4	0.51	8	0.32	0.45	1513	142	69	18	274	4	151	2.92	55.11	0.19
27978	1	4	1	4	1	3	1	3	1	4	0.94	4	5	0.98	1	0.02	0.367384	0.72739	1	26834597	26834745	AluSx	+	S	x	17	1	17	0.5	0.52	17	0.52	0.52	1976	92	59	14	149	5	78	6.71	52.35	0.5
27982	1	4	0.97	4	1	4	0.98	4	0.98	4	1	4	4	0.986667	0.99	0.00333333	0.856594	0.978564	1	26835843	26835998	AluJb	-	J	b	1	1	25	0.97	0.46	11	0.44	0.45	1455	207	7	14	156	4	86	5.13	55.13	0.34
27989	0.94	4	0.94	6	0.78	6	1	3	0.83	5	0.75	6	6	0.86	0.886667	0.0266667	0.880794	0.986646	1	26837860	26838032	AluSx	-	S	x	2	1	3	0.1	0.49	11	0.36	0.5	2004	119	13	13	173	6	86	6.94	49.71	0.59
28017	1	4	1	5	1	3	1	3	1	4	0.75	4	11	0.916667	1	0.0833333	0.315609	0.723448	1	26849464	26849773	AluSc8	+	S	c8	30	0.87	4	0.15	0.47	4	0.15	0.47	2527	71	3	0	310	11	166	7.1	53.55	0.5
28036	0.75	4	0.7	5	0.67	3	0.63	5	0.82	7	1	3	7	0.816667	0.706667	-0.11	0.279114	0.723448	1	26855445	26855561	AluJo	+	J	o	0	0	7	0.22	0.51	8	0.28	0.49	857	120	0	0	117	7	71	11.97	60.68	0.67
28038	1	4	0.85	4	1	4	0.97	4	0.93	5	0.95	4	8	0.95	0.95	0	0.512062	0.820246	1	26859578	26859886	AluSc	-	S	c	0	0	3	0.08	0.54	10	0.31	0.51	2172	84	0	58	309	8	162	5.18	52.43	0.38
28082	0.9	7	0.8	5	0.92	6	1	3	0.86	6	0.78	6	8	0.88	0.873333	-0.00666667	0.59857	0.869511	1	26886301	26886580	AluSz6	+	S	z6	30	0.83	5	0.2	0.45	7	0.2	0.54	1734	132	125	11	280	8	138	5.71	49.29	0.47
28092	1	3	1	3	0.87	7	0.95	4	1	4	0.72	5	16	0.89	0.956667	0.0666667	0.510692	0.819122	1	26890751	26891048	AluY	-	Y	None	0	0	2	0.08	0.44	7	0.34	0.41	2412	81	0	0	298	16	166	10.74	55.7	0.71
28108	0.92	4	1	4	1	6	0.83	5	0.8	5	0.86	7	10	0.83	0.973333	0.143333	0.0209158	0.364377	1	26902396	26902683	AluSz	+	S	z	12	0.92	5	0.17	0.5	7	0.27	0.49	2032	125	21	0	288	10	157	6.94	54.51	0.47
28172	1	4	1	4	0.86	6	1	6	0.89	5	1	5	8	0.963333	0.953333	-0.01	0.937669	1	1	26934389	26934695	AluSx3	+	S	x3	26	1	3	0.14	0.43	9	0.31	0.48	2128	130	7	7	307	8	153	5.21	49.84	0.42
28177	0.86	8	0.94	3	0.97	7	0.86	7	0.9	10	0.83	6	11	0.863333	0.923333	0.06	0.196457	0.629998	1	26936183	26936477	AluSx	+	S	x	12	0.92	1	0.05	0.41	4	0.21	0.39	1938	156	7	7	295	11	160	7.46	54.24	0.52
28198	1	6	0.81	8	0.96	3	1	5	0.98	4	0.92	6	21	0.966667	0.923333	-0.0433333	0.595262	0.867462	1	26949470	26949768	AluY	-	Y	None	0	0	17	0.7	0.44	4	0.2	0.4	2531	43	7	0	299	21	175	14.05	58.53	0.83
28201	1	3	0.8	5	0.67	3	0.8	5	0.67	6	0.6	5	15	0.69	0.823333	0.133333	0.259635	0.705232	1	26950626	26950979	AluSp	-	S	p	0	0	9	0.4	0.42	12	0.38	0.51	2083	65	3	147	354	15	191	8.47	53.95	0.59
28202	1	3	1	5	0.83	3	0.83	6	1	4	0.89	7	12	0.906667	0.943333	0.0366667	0.522132	0.826846	1	26950982	26951279	AluY	-	Y	None	0	0	22	0.61	0.54	5	0.17	0.49	2162	111	3	7	298	12	161	8.05	54.03	0.57
28242	0.75	4	0.7	5	0.71	6	0.65	6	1	8	0.76	5	8	0.803333	0.72	-0.0833333	0.339325	0.723448	1	26972632	26972904	AluSx1	+	S	x1	6	1	1	0.06	0.38	14	0.42	0.52	1848	139	59	0	273	8	141	5.86	51.65	0.45
28260	0.63	5	0.27	4	0.65	5	0.88	5	1	5	0.9	5	5	0.926667	0.516667	-0.41	0.0223786	0.372346	1	26982039	26982317	AluJr4	+	J	r4	20	0.85	2	0.11	0.39	9	0.38	0.44	1457	151	122	25	279	5	136	3.58	48.75	0.31
28266	1	5	0.46	4	0.88	5	1	5	0.68	5	0.88	4	6	0.853333	0.78	-0.0733333	0.8526	0.977915	1	26984336	26984648	AluSx	+	S	x	32	0.78	6	0.2	0.49	4	0.18	0.42	2014	131	3	38	313	6	146	3.83	46.65	0.35
28270	0.75	4	0.75	4	0.7	4	0.67	3	0.75	4	1	3	9	0.806667	0.733333	-0.0733333	0.357774	0.725595	1	26985735	26986034	AluSx1	-	S	x1	0	0	15	0.47	0.52	7	0.21	0.52	2126	117	7	7	300	9	162	6	54	0.41
28274	0.85	4	0.93	4	0.55	3	1	4	0.95	3	0.87	4	5	0.94	0.776667	-0.163333	0.144079	0.558482	1	26988188	26988489	AluJr	+	J	r	26	0.65	3	0.2	0.38	5	0.2	0.45	1841	149	23	13	302	5	156	3.31	51.66	0.25
28283	0.67	3	0.93	5	0.5	3	0.88	8	0.69	4	1	3	10	0.856667	0.7	-0.156667	0.308395	0.723448	1	26992022	26992329	AluSx	-	S	x	0	0	6	0.27	0.42	8	0.28	0.48	2168	136	0	0	308	10	156	6.49	50.65	0.51
28285	1	3	0.75	6	0.78	6	1	6	1	8	0.67	6	8	0.89	0.843333	-0.0466667	0.544709	0.840101	1	26992580	26992880	AluSx1	-	S	x1	0	0	12	0.38	0.5	11	0.46	0.44	2064	136	0	10	301	8	153	5.32	50.83	0.41
28288	0.83	3	0.96	6	0.86	7	0.78	6	0.95	6	1	5	9	0.91	0.883333	-0.0266667	0.483434	0.800797	1	26994220	26994527	AluSx	-	S	x	0	0	11	0.41	0.47	4	0.19	0.41	1955	140	3	19	308	9	147	5.84	47.73	0.53
28306	1	5	1	4	0.6	5	1	6	1	4	0.92	6	9	0.973333	0.866667	-0.106667	0.643822	0.893196	1	27000934	27001245	AluSz6	+	S	z6	28	0.75	5	0.18	0.47	2	0.14	0.33	1949	164	0	6	312	9	165	5.77	52.88	0.42
28311	0.8	5	1	4	0.96	3	1	4	1	4	1	6	12	1	0.92	-0.08	0.1298	0.5379	1	27005446	27005742	AluY	+	Y	None	18	1	3	0.14	0.41	1	0.05	0.39	2355	91	3	0	297	12	159	8.08	53.54	0.57
28332	0.8	6	1	5	1	3	0.71	7	1	3	0.86	7	11	0.856667	0.933333	0.0766667	0.458044	0.781786	1	27015855	27016036	AluY	-	Y	None	0	0	6	0.27	0.43	9	0.37	0.45	1328	64	0	0	182	11	96	12.09	52.75	0.89
28334	0.81	8	1	8	0.88	8	1	5	0.83	6	0.92	7	18	0.916667	0.896667	-0.02	0.874749	0.985353	1	27017744	27018053	AluSc8	-	S	c8	0	0	0	0	0.37	1	0.06	0.36	2453	81	0	0	310	18	170	11.61	54.84	0.78
28337	0.89	3	1	5	1	5	1	6	0.93	6	0.94	6	6	0.956667	0.963333	0.00666667	0.659522	0.900269	1	27031067	27031366	AluJo	+	J	o	16	1	1	0.04	0.44	5	0.18	0.47	1784	160	13	20	300	6	156	4	52	0.3
28350	0.8	5	0.6	8	0.93	8	0.98	7	0.83	6	0.75	4	10	0.853333	0.776667	-0.0766667	0.483918	0.800992	1	27037606	27037912	AluSz	-	S	z	0	0	4	0.18	0.42	6	0.23	0.46	2066	104	7	52	307	10	150	6.51	48.86	0.56
28362	0.75	5	1	4	0.91	6	0.94	3	1	4	0.94	4	9	0.96	0.886667	-0.0733333	0.544498	0.840101	1	27046462	27046754	AluSg	+	S	g	14	1	13	0.53	0.44	5	0.18	0.47	2212	109	7	0	293	9	154	6.14	52.56	0.45
28367	0.95	5	0.82	5	0.75	4	0.93	5	0.8	5	0.75	5	9	0.826667	0.84	0.0133333	0.825787	0.968528	1	27048737	27049035	AluSx	-	S	x	0	0	1	0.05	0.42	1	0.06	0.37	2228	114	3	0	299	9	161	6.02	53.85	0.42
28369	1	8	1	6	0.92	6	0.88	4	0.97	3	1	6	8	0.95	0.973333	0.0233333	0.605265	0.873589	1	27052652	27052965	AluSz6	-	S	z6	0	0	11	0.37	0.49	0	0	0.41	2239	121	0	6	314	8	158	5.1	50.32	0.4
28379	1	3	1	3	1	3	0.75	4	1	4	1	3	8	0.916667	1	0.0833333	0.315609	0.723448	1	27063153	27063413	AluSp	+	S	p	20	1	10	0.33	0.5	4	0.14	0.48	2085	88	4	0	261	8	130	6.13	49.81	0.5
28409	0.75	6	0.79	7	0.87	9	0.94	8	0.62	8	1	8	13	0.853333	0.803333	-0.05	0.328893	0.723448	1	27086897	27087188	AluSp	+	S	p	11	1	0	0	0.38	6	0.21	0.48	2357	65	10	3	292	13	160	8.9	54.79	0.6
28411	1	7	1	5	0.91	8	1	7	0.96	7	1	9	12	0.986667	0.97	-0.0166667	0.743949	0.937897	1	27089982	27090252	AluSg	+	S	g	0	0	6	0.19	0.5	4	0.13	0.49	2130	96	7	0	271	12	154	8.86	56.83	0.55
28450	0.75	4	0.93	7	0.9	7	0.92	5	0.75	4	1	3	10	0.89	0.86	-0.03	0.488281	0.803943	1	27124921	27125227	AluSz6	+	S	z6	30	0.8	2	0.13	0.35	2	0.09	0.41	2169	127	16	0	307	10	151	6.51	49.19	0.54
28531	0.88	4	1	4	1	3	1	3	1	3	1	3	4	1	0.96	-0.04	0.332932	0.723448	1	27173699	27174002	AluJo	-	J	o	0	0	16	0.68	0.44	4	0.18	0.42	1916	155	3	23	304	4	157	2.63	51.64	0.2
28545	0.2	10	0.58	12	0.2	5	0	4	0.08	3	0	4	19	0.0266667	0.326667	0.3	0.0137473	0.316918	1	27192187	27192489	AluY	+	Y	None	19	0.68	41	0.79	0.64	11	0.4	0.47	2372	66	0	23	303	19	180	12.54	59.41	0.71
28581	0.8	5	1	4	1	6	1	6	1	5	1	6	7	1	0.933333	-0.0666667	0.319756	0.723448	1	27209996	27210300	AluSq2	+	S	q2	23	0.91	4	0.17	0.47	11	0.32	0.53	2214	118	10	7	305	7	154	4.59	50.49	0.36
28610	1	4	1	4	1	4	0.83	3	0.67	4	1	4	4	0.833333	1	0.166667	0.0787286	0.500778	1	27224347	27224653	AluJb	+	J	b	0	0	9	0.25	0.53	8	0.3	0.48	1750	136	21	4	307	4	151	2.61	49.19	0.22
28618	0.74	4	0.79	4	0.52	4	0.89	4	0.87	4	0.71	4	4	0.823333	0.683333	-0.14	0.205467	0.641614	1	27229093	27229250	AluJo	+	J	o	14	1	2	0.09	0.46	9	0.4	0.42	787	196	32	6	158	4	78	5.06	49.37	0.44
28623	0.52	3	0.65	3	0.69	3	0.92	3	0.86	3	0.85	3	3	0.876667	0.62	-0.256667	0.015274	0.326624	1	27230928	27231080	AluJo	-	J	o	0	0	7	0.38	0.39	8	0.34	0.44	831	189	0	0	153	3	83	3.92	54.25	0.28
28629	0.69	7	1	4	0.71	7	0.67	6	0.62	4	0.06	8	13	0.45	0.8	0.35	0.132172	0.5417	1	27232491	27232794	AluSp	+	S	p	25	0.84	4	0.16	0.46	17	0.5	0.53	2107	99	13	0	304	13	163	8.55	53.62	0.61
28635	1	6	0.96	6	0.9	7	1	6	0.94	8	0.89	7	10	0.943333	0.953333	0.01	0.856858	0.978691	1	27235221	27235462	AluSg4	-	S	g4	0	0	6	0.23	0.46	9	0.3	0.49	1578	107	66	0	242	10	119	8.26	49.17	0.68
28648	0.78	3	0.72	3	0.78	3	1	3	0.94	3	0.89	3	3	0.943333	0.76	-0.183333	0.0383976	0.433957	1	27243168	27243467	AluJb	+	J	b	26	0.73	1	0.05	0.42	10	0.3	0.52	1695	180	17	3	300	3	147	2	49	0.17
28674	1	3	1	4	0.91	11	0.8	5	0.88	8	1	7	13	0.893333	0.97	0.0766667	0.337304	0.723448	1	27253879	27254186	AluSg	-	S	g	0	0	6	0.24	0.46	3	0.2	0.35	2208	110	0	0	308	13	162	8.44	52.6	0.61
28677	1	3	1	3	1	3	1	3	1	3	1	3	3	1	1	0	1	1	1	27255783	27255914	FLAM_A	+	FLAM_A	None	17	0.94	4	0.22	0.38	7	0.34	0.41	856	144	15	0	132	3	67	4.55	50.76	0.35
28679	1	7	1	7	1	8	1	7	1	7	1	7	8	1	1	0	1	1	1	27256662	27256928	AluJb	-	J	b	0	0	7	0.28	0.45	5	0.17	0.48	1339	161	4	49	267	8	141	5.99	52.81	0.43
28687	1	3	0.95	5	0.94	6	0.83	6	0.88	4	1	4	9	0.903333	0.963333	0.06	0.513038	0.820993	1	27258662	27258969	AluSg	-	S	g	0	0	8	0.28	0.48	3	0.16	0.39	2070	130	0	13	308	9	152	5.84	49.35	0.48
28693	1	3	1	3	1	4	0.83	3	1	5	0.92	4	9	0.916667	1	0.0833333	0.0907667	0.500778	1	27261461	27261773	AluSx1	-	S	x1	0	0	16	0.51	0.51	2	0.09	0.43	2329	86	0	3	313	9	167	5.75	53.35	0.41
28698	0.95	11	1	11	1	7	1	10	1	12	1	11	14	1	0.983333	-0.0166667	0.382679	0.735821	1	27263764	27264071	AluJb	-	J	b	0	0	7	0.27	0.46	3	0.12	0.45	1548	162	7	65	308	14	167	9.09	54.22	0.62
28700	1	4	1	4	1	5	1	4	1	5	1	4	7	1	1	0	1	1	1	27265497	27265808	AluSx	-	S	x	0	0	4	0.13	0.51	3	0.12	0.45	1759	112	22	77	312	7	174	4.49	55.77	0.29
28709	1	5	0.64	4	0.8	5	0.6	5	1	3	1	5	5	0.866667	0.813333	-0.0533333	0.559343	0.849315	1	27269704	27269996	AluJr	-	J	r	5	0.4	12	0.31	0.57	8	0.26	0.5	1719	150	0	34	293	5	140	3.41	47.78	0.31
28733	0.75	8	1	3	0.93	5	0.8	5	0.71	7	0.78	9	12	0.763333	0.893333	0.13	0.149481	0.564614	1	27284619	27284923	AluSc8	-	S	c8	0	0	7	0.28	0.45	3	0.13	0.44	2409	66	13	16	305	12	164	7.87	53.77	0.54
28737	1	6	0.98	6	0.64	4	1	5	0.69	6	0.88	4	12	0.856667	0.873333	0.0166667	0.718875	0.927543	1	27287769	27288075	AluSx3	+	S	x3	27	0.78	4	0.14	0.47	3	0.12	0.45	2224	79	4	0	307	12	166	7.82	54.07	0.54
28761	0.65	5	1	5	1	5	0.9	7	0.62	4	1	7	7	0.84	0.883333	0.0433333	0.611587	0.876645	1	27299606	27299910	AluSx1	+	S	x1	26	0.85	4	0.12	0.54	3	0.08	0.54	2169	115	13	7	305	7	158	4.59	51.8	0.35
28769	0.68	5	0.78	6	0.92	3	0.83	3	1	4	0.8	5	6	0.876667	0.793333	-0.0833333	0.363413	0.72739	1	27304736	27304939	AluSg7	+	S	g7	0	0	3	0.12	0.44	9	0.32	0.48	1611	93	0	0	204	6	114	5.88	55.88	0.39
28781	0.77	8	1	4	0.67	5	0.83	6	0.91	6	0.68	6	10	0.806667	0.813333	0.00666667	0.616094	0.878244	1	27310904	27311192	AluJb	-	J	b	0	0	6	0.26	0.43	8	0.28	0.48	1944	159	0	3	289	10	158	6.92	54.67	0.47
28814	0.8	5	0.8	5	0.95	5	1	3	1	4	0.5	4	11	0.833333	0.85	0.0166667	0.45133	0.780407	1	27333884	27334172	AluSg4	-	S	g4	0	0	6	0.21	0.48	5	0.19	0.45	2282	90	21	0	289	11	151	7.61	52.25	0.56
28839	1	3	0.5	4	0.84	4	0.97	4	0.66	4	0.9	4	4	0.843333	0.78	-0.0633333	0.984761	1	1	27345603	27345882	AluJr	-	J	r	0	0	7	0.27	0.46	6	0.2	0.5	1431	186	71	25	280	4	132	2.86	47.14	0.26
28850	0.76	3	0.92	4	0.82	4	1	4	0.84	4	0.89	3	6	0.91	0.833333	-0.0766667	0.288087	0.723448	1	27350448	27350757	AluSx1	-	S	x1	0	0	14	0.48	0.48	7	0.28	0.45	2192	136	7	0	310	6	154	3.87	49.68	0.33
28858	0.5	3	0.96	3	0.77	4	1	4	1	4	0.97	4	5	0.99	0.743333	-0.246667	0.0271066	0.392752	1	27355086	27355335	AluJb	-	J	b	0	0	11	0.42	0.46	9	0.28	0.51	1568	120	152	4	250	5	138	4	55.2	0.27
28883	0.65	6	0.74	6	0.79	6	0.91	7	0.96	8	0.9	6	11	0.923333	0.726667	-0.196667	0.0172553	0.339155	1	27368794	27369103	AluSq2	+	S	q2	30	0.83	7	0.19	0.54	7	0.33	0.41	2260	107	3	7	310	11	163	7.1	52.58	0.52
28897	0.84	12	0.89	9	0.94	9	0.85	10	0.72	9	0.98	15	19	0.85	0.89	0.04	0.979467	1	1	27378675	27378988	AluSx3	+	S	x3	13	1	3	0.1	0.49	8	0.22	0.55	2005	83	13	73	314	19	182	12.1	57.96	0.72
28911	0.92	4	0.94	6	0.88	7	1	6	0.93	7	0.93	7	11	0.953333	0.913333	-0.04	0.264375	0.710652	1	27387219	27387387	AluY	-	Y	None	0	0	16	0.5	0.51	9	0.31	0.49	2309	65	6	19	169	11	97	13.02	57.4	0.79
28923	0.78	3	0.73	3	0.94	3	0.97	3	0.93	3	0.83	3	7	0.91	0.816667	-0.0933333	0.285918	0.723448	1	27393462	27393766	AluSx1	-	S	x1	0	0	6	0.19	0.5	8	0.26	0.49	2252	121	7	0	305	7	154	4.59	50.49	0.37
28936	0.49	4	0.09	4	0.32	5	0.79	3	0.82	4	0.83	4	5	0.813333	0.3	-0.513333	0.0114277	0.297807	1	27400405	27400691	AluJo	+	J	o	7	1	4	0.12	0.52	2	0.06	0.51	1856	164	11	3	287	5	150	3.48	52.26	0.26
28938	0.78	5	0.8	5	0.88	4	0.82	7	0.96	5	0.94	6	9	0.906667	0.82	-0.0866667	0.161813	0.583713	1	27401639	27401927	AluSx	-	S	x	0	0	4	0.11	0.55	8	0.32	0.45	2146	100	17	0	289	9	156	6.23	53.98	0.43
28982	0.53	3	0.83	3	0.5	3	0.58	3	0.81	3	0.74	3	5	0.71	0.62	-0.09	0.573574	0.856284	1	27431784	27432088	AluSq2	-	S	q2	0	0	2	0.07	0.5	11	0.31	0.54	2299	105	10	3	305	5	153	3.28	50.16	0.27
28988	0.92	7	1	6	0.76	7	0.78	6	0.93	5	0.88	4	8	0.863333	0.893333	0.03	0.458809	0.782401	1	27434887	27435171	AluSq2	+	S	q2	11	0.91	20	0.55	0.55	7	0.17	0.59	1864	158	32	0	285	8	147	5.61	51.58	0.43
29012	0.33	3	0.91	7	1	3	0.92	6	1	5	1	5	10	0.973333	0.746667	-0.226667	0.27507	0.722351	1	27446650	27446916	AluSq	-	S	q	0	0	2	0.07	0.47	8	0.26	0.49	1912	124	45	0	267	10	149	7.49	55.81	0.48
29016	0.8	5	0.92	4	0.9	5	0.83	6	0.7	6	0.9	5	10	0.81	0.873333	0.0633333	0.431543	0.767972	1	27448332	27448633	AluSx3	+	S	x3	28	0.79	5	0.15	0.52	4	0.1	0.57	2155	109	30	7	302	10	152	6.62	50.33	0.52
29027	1	3	1	3	1	4	1	4	0.95	5	0.8	5	6	0.916667	1	0.0833333	0.114599	0.519078	1	27454866	27455166	AluJb	+	J	b	18	1	8	0.28	0.48	13	0.34	0.55	1975	143	7	7	301	6	159	3.99	52.82	0.29
29032	1	5	1	6	0.6	5	0.75	8	1	6	1	3	17	0.916667	0.866667	-0.05	0.890103	0.989146	1	27456580	27456892	AluSx3	-	S	x3	0	0	4	0.12	0.53	2	0.06	0.52	2365	102	0	6	313	17	170	10.86	54.31	0.74
29041	0.83	3	0.71	3	1	3	1	3	0.67	3	1	3	10	0.89	0.846667	-0.0433333	0.559865	0.849685	1	27460257	27460553	AluSg7	-	S	g7	0	0	4	0.11	0.54	3	0.1	0.48	2356	88	0	3	297	10	158	6.73	53.2	0.49
29057	0.59	4	0.6	5	0.62	4	0.78	3	0.88	3	0.96	5	7	0.873333	0.603333	-0.27	0.0288722	0.400252	1	27471218	27471576	AluSx	+	S	x	30	0.87	7	0.22	0.51	3	0.1	0.49	1953	103	3	134	359	7	184	3.9	51.25	0.3
29101	0.9	5	0.89	6	0.81	6	0.88	4	0.83	5	0.88	6	8	0.863333	0.866667	0.00333333	0.89618	0.99134	1	27490364	27490670	AluSq2	-	S	q2	0	0	5	0.19	0.46	2	0.09	0.42	2121	98	19	39	307	8	156	5.21	50.81	0.41
29108	0.67	3	1	3	0.94	9	0.86	7	1	3	0.92	4	12	0.926667	0.87	-0.0566667	0.83919	0.974253	1	27493769	27494061	AluSx	-	S	x	0	0	3	0.14	0.47	6	0.23	0.46	2314	85	0	7	293	12	160	8.19	54.61	0.55
29131	0.96	7	0.88	4	0.83	7	0.92	6	1	7	0.98	7	8	0.966667	0.89	-0.0766667	0.121708	0.525492	1	27502247	27502546	AluSz	-	S	z	0	0	7	0.21	0.52	2	0.07	0.46	2028	130	10	7	300	8	149	5.33	49.67	0.44
29147	1	4	1	6	1	3	1	4	1	4	1	3	23	1	1	0	1	1	1	27513375	27513683	AluYb8	+	Y	b8	20	0.95	6	0.26	0.43	2	0.09	0.44	2855	19	0	0	309	23	181	14.89	58.58	0.88
29161	0.25	7	0.32	8	0.29	7	0.67	7	0.8	9	0.78	8	9	0.75	0.286667	-0.463333	0.00268102	0.181684	1	27518879	27519148	AluSg	-	S	g	0	0	3	0.11	0.46	6	0.19	0.51	1680	126	126	0	270	9	147	6.67	54.44	0.45
29207	0.83	3	0.92	6	0.6	5	1	5	1	5	1	4	7	1	0.783333	-0.216667	0.00289034	0.185874	1	27543007	27543296	AluJb	-	J	b	0	0	5	0.24	0.41	5	0.32	0.35	1864	172	10	0	290	7	150	4.83	51.72	0.37
29237	1	4	0.86	4	0.6	4	0.88	4	0.75	4	0.81	4	4	0.813333	0.82	0.00666667	0.529693	0.831058	1	27557525	27557624	AluJr	-	J	r	0	0	12	0.39	0.5	11	0.46	0.45	393	180	390	29	100	4	48	8	48	0.7
29239	0.44	3	0.67	3	0.72	4	0.85	4	0.83	3	0.78	3	10	0.82	0.61	-0.21	0.0712353	0.500778	1	27557900	27558186	AluSx	+	S	x	8	0.88	16	0.67	0.45	14	0.43	0.51	2252	98	0	3	287	10	154	6.97	53.66	0.49
29240	0.73	5	0.86	9	0.56	9	0.83	6	0.55	7	0.83	6	13	0.736667	0.716667	-0.02	0.875168	0.985353	1	27558378	27558666	AluY	+	Y	None	17	0.88	11	0.38	0.48	17	0.56	0.49	2149	73	45	14	289	13	163	9	56.4	0.59
29248	0.67	3	1	6	0.51	6	0.88	4	1	3	1	7	11	0.96	0.726667	-0.233333	0.237387	0.679191	1	27564059	27564382	AluSc8	+	S	c8	30	0.9	7	0.26	0.47	0	0	0.4	2415	80	0	40	324	11	162	6.79	50	0.55
29269	0.8	5	1	5	1	4	0.88	4	0.93	5	0.97	5	5	0.926667	0.933333	0.00666667	0.454846	0.780407	1	27570812	27571137	AluJr4	-	J	r4	0	0	6	0.25	0.45	4	0.17	0.44	1929	150	0	49	326	5	161	3.07	49.39	0.26
29290	0.96	7	0.93	5	0.8	5	0.89	6	0.88	4	0.69	7	7	0.82	0.896667	0.0766667	0.304184	0.723448	1	27580806	27581098	AluSz6	+	S	z6	13	0.92	2	0.15	0.33	10	0.41	0.45	1974	140	14	7	293	7	146	4.78	49.83	0.39
29316	0.91	4	0.4	4	0.85	4	0.47	4	0.56	3	0.75	4	5	0.593333	0.72	0.126667	0.379126	0.735821	1	27593737	27593985	AluSz6	-	S	z6	0	0	3	0.19	0.35	2	0.19	0.29	1594	153	16	0	249	5	126	4.02	50.6	0.32
29322	0.75	4	0.97	5	0.88	4	1	5	0.97	4	0.8	5	5	0.923333	0.866667	-0.0566667	0.400617	0.750069	1	27596447	27596711	AluJb	-	J	b	0	0	11	0.44	0.45	4	0.17	0.45	1645	181	53	4	265	5	147	3.77	55.47	0.25
29339	0.88	4	1	4	1	5	1	3	0.96	5	1	5	5	0.986667	0.96	-0.0266667	0.681279	0.909492	1	27605743	27605954	AluJb	+	J	b	0	0	5	0.25	0.4	4	0.16	0.45	1460	137	0	19	212	5	117	4.72	55.19	0.31
29351	0.75	4	1	4	1	5	0.93	5	1	5	0.9	5	9	0.943333	0.916667	-0.0266667	0.814614	0.964604	1	27612098	27612378	AluSp	-	S	p	0	0	4	0.16	0.45	8	0.33	0.44	1982	100	114	4	281	9	145	6.41	51.6	0.49
29361	0.75	6	0.8	5	1	3	0.9	4	0.87	4	0.79	5	6	0.853333	0.85	-0.00333333	0.616913	0.878596	1	27618983	27619217	AluJb	-	J	b	0	0	5	0.16	0.51	15	0.55	0.47	1520	157	13	8	235	6	124	5.11	52.77	0.39
29401	0.95	7	0.69	5	0.93	7	0.97	10	0.86	7	0.89	9	12	0.906667	0.856667	-0.05	0.676213	0.908461	1	27649989	27650284	AluSg	+	S	g	21	0.71	6	0.29	0.41	10	0.38	0.46	1969	138	17	0	296	12	155	8.11	52.36	0.6
29407	1	3	1	3	1	3	1	4	1	3	1	4	10	1	1	0	1	1	1	27656311	27656602	AluSz	+	S	z	10	0.9	5	0.25	0.4	12	0.34	0.53	2274	103	0	0	292	10	159	6.85	54.45	0.47
29413	1	3	0.8	5	0.5	4	0.76	5	1	8	1	4	11	0.92	0.766667	-0.153333	0.391792	0.74335	1	27663614	27663918	AluSx1	-	S	x1	0	0	8	0.2	0.57	18	0.56	0.51	2075	148	23	0	305	11	154	7.21	50.49	0.57
29414	0.88	4	0.75	4	0.87	5	0.8	5	0.81	6	1	6	16	0.87	0.833333	-0.0366667	0.449752	0.780407	1	27664006	27664309	AluY	+	Y	None	23	0.83	12	0.39	0.5	7	0.25	0.48	2444	72	0	0	304	16	172	10.53	56.58	0.66
29421	0.4	3	0.28	3	0.67	3	0.62	5	0.82	4	0.7	4	13	0.713333	0.45	-0.263333	0.102915	0.505894	1	27666997	27667313	AluY	-	Y	None	0	0	9	0.29	0.5	12	0.32	0.55	2244	76	0	17	317	13	165	8.2	52.05	0.61
29427	0.75	4	1	4	1	4	0.92	3	1	5	0.95	5	9	0.956667	0.916667	-0.04	0.934727	1	1	27671061	27671362	AluSg	+	S	g	29	0.97	10	0.31	0.51	11	0.26	0.58	2328	89	23	0	302	9	156	5.96	51.66	0.45
29435	0.69	8	0.86	5	0.86	7	1	5	1	4	0.57	7	9	0.856667	0.803333	-0.0533333	0.25174	0.696795	1	27678549	27678843	AluSx1	+	S	x1	16	0.94	6	0.16	0.55	15	0.47	0.51	2152	112	20	10	295	9	151	6.1	51.19	0.47
29437	0.64	3	0.94	5	0.84	4	0.75	4	0.87	3	0.88	4	7	0.833333	0.806667	-0.0266667	0.997433	1	1	27679281	27679576	AluSx	-	S	x	0	0	18	0.55	0.51	13	0.27	0.63	2274	108	0	0	296	7	157	4.73	53.04	0.34
29505	0.92	4	0.67	3	0.87	3	1	3	1	6	1	3	8	1	0.82	-0.18	0.00256427	0.178857	1	27747016	27747322	AluSx1	-	S	x1	0	0	6	0.26	0.43	3	0.15	0.4	2400	78	3	10	307	8	158	5.21	51.47	0.4
29515	0.94	4	0.96	4	1	4	1	4	0.93	4	1	3	4	0.976667	0.966667	-0.01	0.630426	0.885463	1	27751589	27751893	AluJo	-	J	o	0	0	4	0.14	0.48	16	0.49	0.51	1664	200	20	3	305	4	145	2.62	47.54	0.23
29518	1	5	0.92	4	0.92	4	0.95	4	1	4	1	4	5	0.983333	0.946667	-0.0366667	0.339461	0.723448	1	27752373	27752551	AluSx	+	S	x	26	0.85	16	0.49	0.51	2	0.12	0.39	1997	111	3	29	179	5	91	5.59	50.84	0.43
29522	0.87	5	0.8	5	0.86	6	0.25	4	1	4	0.86	7	9	0.703333	0.843333	0.14	0.963496	1	1	27756003	27756301	AluSq2	+	S	q2	16	1	1	0.05	0.39	5	0.25	0.4	2301	97	3	3	299	9	157	6.02	52.51	0.45
29524	1	3	0.87	3	0.95	4	0.96	4	0.69	4	1	3	4	0.883333	0.94	0.0566667	0.820117	0.967192	1	27757153	27757282	AluJb	-	J	b	0	0	6	0.26	0.43	2	0.11	0.39	795	185	8	0	130	4	61	6.15	46.92	0.56
29533	1	3	1	4	1	3	1	4	1	3	1	4	4	1	1	0	1	1	1	27766232	27766541	AluJb	+	J	b	27	0.81	2	0.15	0.33	7	0.3	0.44	1891	171	3	7	310	4	149	2.58	48.06	0.22
29567	0.88	4	0.94	3	0.88	4	0.92	3	0.94	4	0.67	3	5	0.843333	0.9	0.0566667	0.69672	0.917258	1	27780869	27781148	AluJo	-	J	o	0	0	3	0.21	0.34	3	0.21	0.34	1693	154	61	4	280	5	141	3.57	50.36	0.28
29570	1	6	0.92	12	1	5	0.97	9	1	10	0.86	7	13	0.943333	0.973333	0.03	0.578569	0.858757	1	27783238	27783553	AluSx1	-	S	x1	0	0	2	0.12	0.37	5	0.2	0.44	2236	95	3	29	316	13	166	8.23	52.53	0.6
29574	1	7	0.96	6	1	3	0.95	7	0.87	9	1	9	13	0.94	0.986667	0.0466667	0.301072	0.723448	1	27784539	27784845	AluSx	+	S	x	26	1	3	0.14	0.41	8	0.45	0.38	2126	121	16	13	307	13	160	8.47	52.12	0.63
29581	0.87	9	1	10	0.92	11	0.83	13	0.92	12	0.97	9	21	0.906667	0.93	0.0233333	0.62059	0.880376	1	27787972	27788284	AluY	-	Y	None	0	0	11	0.46	0.44	9	0.28	0.5	2436	45	0	45	313	21	175	13.42	55.91	0.88
29586	0.98	6	0.97	5	0.98	6	0.97	5	1	5	1	6	8	0.99	0.976667	-0.0133333	0.369384	0.729275	1	27789333	27789630	AluSz	-	S	z	0	0	3	0.18	0.37	12	0.51	0.44	1957	131	47	7	298	8	143	5.37	47.99	0.47
29600	1	5	1	5	1	3	0.75	4	0.81	3	1	3	6	0.853333	1	0.146667	0.0757423	0.500778	1	27796171	27796465	AluSx	+	S	x	11	1	5	0.32	0.36	3	0.18	0.4	2200	112	0	7	295	6	154	4.07	52.2	0.3
29602	1	4	0.86	5	1	5	0.97	5	1	5	1	5	5	0.99	0.953333	-0.0366667	0.571709	0.856284	1	27797882	27798141	AluJb	+	J	b	3	1	22	0.66	0.52	7	0.29	0.44	1333	204	96	0	260	5	141	3.85	54.23	0.26
29603	0.98	9	0.67	9	0.97	10	0.95	7	0.83	11	0.86	7	11	0.88	0.873333	-0.00666667	0.582861	0.861199	1	27798562	27798852	AluSg	+	S	g	22	0.86	4	0.17	0.44	2	0.07	0.49	1905	144	21	0	291	11	154	7.56	52.92	0.54
29622	0.71	7	1	6	1	5	1	3	0.94	8	1	4	14	0.98	0.903333	-0.0766667	0.634308	0.887894	1	27807244	27807576	AluY	+	Y	None	28	0.89	8	0.36	0.42	12	0.4	0.49	2356	45	18	90	333	14	183	8.41	54.95	0.56
[truncated: 115,780 more rows]

## Sheet: NSUMA-WGBS Alu overlap
Alu_id	Canc1_CM	Canc1_CGinf	Canc2_CM	Canc2_CGinf	Canc3_CM	Canc3_CGinf	Norm1_CM	Norm1_CGinf	Norm2_CM	Norm2_CGinf	Norm3_CM	Norm3_CGinf	totalCpG	meanNorm	meanCan	difNormCan	P.Value	adj.P.Val	chrom	chromStart	chromEnd	Alu_family	strand	Alu_mainfamily	Alu_subFamily	polyA_length	polyA_perA	up500_cpgNum	up500_OEratio	up500_perGc	down500_cpgNum	down500_OEratio	down500_perGc	swScore	milliDiv	milliDel	milliIns	length	cpgNum	gcNum	perCpg	perGc	OEratio	ampID	369_blood	544_blood	557_blood	369_normalcolon	544_normalcolon
380	0.5	4	0.83	6	1	3	0.8	5	0.76	5	0.5	4	13	0.686667	0.776667	0.09	0.375684	0.734988	1	830670	830888	AluYk4	-	Y	k4	0	0	13	0.44	0.49	6	0.32	0.39	1848	59	5	0	219	13	127	11.87	57.99	0.73	173	0	0	0	1	0
381	0.5	3	1	4	0.74	3	1	4	1	3	1	6	19	1	0.746667	-0.253333	0.0756476	0.500778	1	834402	834706	AluY	-	Y	None	0	0	17	0.5	0.52	16	0.42	0.56	2633	39	0	7	305	19	170	12.46	55.74	0.81	175	0	0	0	0	0
400	0.88	7	0.48	4	0.37	7	0.82	7	0.65	8	0.7	11	13	0.723333	0.576667	-0.146667	0.522351	0.826875	1	920274	920552	AluSz	-	S	z	0	0	20	0.73	0.47	11	0.42	0.46	2070	90	11	14	279	13	162	9.32	58.06	0.55	388	3	5	3	11	5
426	0.67	6	0.64	6	0.56	3	0.75	4	0.9	5	0.44	8	12	0.696667	0.623333	-0.0733333	0.497702	0.810211	1	944205	944490	AluJb	-	J	b	0	0	14	0.49	0.48	18	0.56	0.51	1904	136	25	0	286	12	155	8.39	54.2	0.58	426	1	1	1	3	0
448	0.14	9	0.16	6	0.19	8	0.38	6	0.56	9	0.88	4	14	0.606667	0.163333	-0.443333	0.0245718	0.382898	1	993189	993488	AluSx1	+	S	x1	21	0.81	13	0.43	0.5	15	0.32	0.63	2240	107	10	0	300	14	162	9.33	54	0.64	489	1	0	0	3	1
543	1	7	1	3	0.75	4	1	4	1	5	1	3	14	1	0.916667	-0.0833333	0.315609	0.723448	1	1197261	1197536	AluSp	-	S	p	0	0	8	0.28	0.48	12	0.32	0.56	2247	83	4	0	276	14	157	10.14	56.88	0.64	773	0	0	0	2	0
608	0.78	5	1	10	0.8	5	0.73	5	0.65	5	1	3	13	0.793333	0.86	0.0666667	0.822806	0.968418	1	1313552	1313863	AluSx	-	S	x	0	0	13	0.43	0.5	17	0.54	0.51	1871	122	26	51	312	13	160	8.33	51.28	0.65	915	0	0	0	0	1
656	0.86	16	0.58	13	0.78	17	0.79	16	0.68	15	0.8	16	17	0.756667	0.74	-0.0166667	0.970736	1	1	1341455	1341746	AluSz	+	S	z	12	0.92	6	0.25	0.45	34	0.73	0.65	1997	137	20	0	292	17	160	11.64	54.79	0.78	939	7	3	2	16	8
661	1	6	0.94	6	0.73	5	1	5	0.96	6	1	6	9	0.986667	0.89	-0.0966667	0.247119	0.691356	1	1344547	1344828	AluSx1	+	S	x1	21	0.81	21	0.71	0.49	5	0.18	0.47	1903	128	75	0	282	9	156	6.38	55.32	0.42	949	0	1	0	3	0
694	0.67	3	0.7	5	0.75	4	1	4	1	5	1	4	10	1	0.706667	-0.293333	7.80761e-05	0.100154	1	1386425	1386714	AluY	-	Y	None	0	0	25	0.52	0.64	15	0.42	0.54	2243	83	21	7	290	10	160	6.9	55.17	0.45	993	2	1	0	15	5
736	1	7	1	6	0.96	8	0.89	9	0.92	7	0.83	8	11	0.88	0.986667	0.106667	0.0124913	0.306361	1	1418392	1418697	AluSc8	+	S	c8	13	0.85	13	0.33	0.56	10	0.3	0.52	1615	144	36	62	306	11	157	7.19	51.31	0.56	1040	0	0	0	0	0
838	1	5	1	6	0.9	5	1	5	1	6	1	4	17	1	0.966667	-0.0333333	0.339508	0.723448	1	1500438	1500736	AluY	+	Y	None	0	0	17	0.58	0.48	11	0.36	0.5	2010	50	0	114	299	17	179	11.37	59.87	0.65	1165	0	0	0	1	0
850	0.33	3	1	7	1	7	1	5	0.67	6	1	3	14	0.89	0.776667	-0.113333	0.813792	0.96419	1	1507175	1507474	AluY	-	Y	None	0	0	12	0.51	0.44	16	0.51	0.5	2305	70	0	27	300	14	170	9.33	56.67	0.59	1172	0	1	0	1	0
856	0	6	0	6	0.13	8	0.33	3	0.25	10	0.25	8	25	0.276667	0.0433333	-0.233333	0.0208736	0.36411	1	1511094	1511391	AluY	+	Y	None	18	0.94	24	0.82	0.49	2	0.09	0.42	2592	34	0	0	298	25	181	16.78	60.74	0.91	1175	3	1	1	6	6
887	0.75	4	1	4	1	4	0.75	4	0.89	3	1	4	14	0.88	0.916667	0.0366667	0.569989	0.855765	1	1526643	1526937	AluSx	-	S	x	0	0	12	0.38	0.5	13	0.38	0.52	2484	64	0	0	295	14	168	9.49	56.95	0.59	1194	1	0	0	1	1
929	0.9	5	0.79	7	0.83	6	0.87	5	0.95	7	0.96	8	11	0.926667	0.84	-0.0866667	0.118704	0.522706	1	1587096	1587336	AluSc	+	S	c	4	0.5	7	0.32	0.42	6	0.28	0.41	1590	108	162	0	241	11	136	9.13	56.43	0.57	1260	0	1	0	5	2
1256	0.82	9	0.87	5	0.95	10	0.86	7	0.89	9	0.97	8	22	0.906667	0.88	-0.0266667	0.628768	0.884521	1	1811758	1812034	AluYc3	+	Y	c3	10	1	2	0.08	0.44	8	0.26	0.5	2211	50	11	0	277	22	167	15.88	60.29	0.88	1465	0	0	0	6	5
1270	1	9	0.7	5	1	3	0.42	6	0.62	4	0.93	8	15	0.656667	0.9	0.243333	0.126549	0.532962	1	1819072	1819351	AluSz6	-	S	z6	0	0	2	0.14	0.35	6	0.33	0.38	1880	111	46	0	280	15	155	10.71	55.36	0.74	1476	1	1	1	0	1
1969	0.83	6	0.88	4	0.75	4	0.79	6	0.8	5	1	4	9	0.863333	0.82	-0.0433333	0.422127	0.761542	1	3674756	3675049	AluSc	-	S	c	0	0	11	0.36	0.49	8	0.26	0.49	2232	102	7	0	294	9	155	6.12	52.72	0.45	3331	1	0	0	1	1
1997	1	3	0.62	4	0.25	4	0.54	4	0.69	4	0.93	3	12	0.72	0.623333	-0.0966667	0.931185	1	1	3710479	3710784	AluY	+	Y	None	26	0.69	8	0.28	0.48	10	0.33	0.49	2331	101	3	0	306	12	165	7.84	53.92	0.54	3363	1	0	0	0	0
2016	1	4	1	5	1	4	0.86	7	0.83	6	0.8	5	15	0.83	1	0.17	0.000242873	0.102528	1	3729122	3729448	AluSx3	+	S	x3	27	0.85	1	0.14	0.24	6	0.42	0.34	2285	73	0	49	327	15	181	9.17	55.35	0.6	3376	0	0	0	1	1
2054	0.33	5	0.6	5	0.8	5	0.28	8	0.62	10	0.39	3	16	0.43	0.576667	0.146667	0.394318	0.745361	1	3772697	3772946	AluSz	+	S	z	3	1	5	0.21	0.44	43	0.97	0.6	1871	44	116	0	250	16	144	12.8	57.6	0.78	3412	7	7	4	15	11
2091	1	3	0.88	7	0.93	5	0.83	6	0.93	7	1	11	20	0.92	0.936667	0.0166667	0.90372	0.993648	1	3818444	3818748	AluY	-	Y	None	0	0	22	0.52	0.58	9	0.3	0.49	2469	66	3	3	305	20	170	13.11	55.74	0.85	3468	0	1	0	0	1
2094	1	5	0.97	6	0.8	5	1	5	0.83	3	1	5	11	0.943333	0.923333	-0.02	0.733573	0.93309	1	3830419	3830705	AluSz	-	S	z	0	0	8	0.24	0.51	17	0.41	0.58	2056	112	35	3	287	11	157	7.67	54.7	0.52	3479	0	0	0	1	0
2623	1	3	0.45	5	0.25	4	0.68	5	0.94	4	0.5	3	9	0.706667	0.566667	-0.14	0.968793	1	1	5339906	5340214	AluSx	-	S	x	0	0	9	0.28	0.51	2	0.07	0.48	2185	129	10	0	309	9	164	5.83	53.07	0.42	3887	0	0	0	0	0
2664	0.57	4	0.53	4	0.76	4	0.79	4	0.96	4	0.91	4	7	0.886667	0.62	-0.266667	0.0357629	0.42551	1	5408546	5408819	AluSg	-	S	g	0	0	6	0.24	0.46	12	0.36	0.53	2147	95	4	4	274	7	151	5.11	55.11	0.34	3902	0	1	0	3	1
2932	0.73	5	0.85	7	0.9	7	0.79	7	0.69	8	1	6	13	0.826667	0.826667	0	0.61258	0.877278	1	6068400	6068697	AluSx	+	S	x	15	1	10	0.22	0.6	7	0.16	0.59	2257	87	10	17	298	13	159	8.72	53.36	0.61	4197	3	3	1	1	0
3064	0.94	9	0.78	9	0.79	7	1	8	1	8	1	6	14	1	0.836667	-0.163333	0.00257607	0.178857	1	6248853	6249144	AluSp	-	S	p	0	0	6	0.22	0.47	3	0.13	0.43	2349	51	20	7	292	14	161	9.59	55.14	0.64	4356	0	0	0	0	0
3126	1	4	0.95	4	1	4	0.75	4	1	4	1	4	9	0.916667	0.983333	0.0666667	0.615418	0.877904	1	6288805	6289118	AluSx	+	S	x	26	0.88	12	0.38	0.5	13	0.42	0.5	2249	112	0	19	314	9	161	5.73	51.27	0.44	4377	0	0	0	1	0
3206	1	4	1	4	1	5	0.67	3	0.75	4	0.86	7	13	0.76	1	0.24	0.000385419	0.110547	1	6387824	6388131	AluSc	-	S	c	0	0	14	0.45	0.5	7	0.24	0.48	2372	97	3	0	308	13	168	8.44	54.55	0.57	4463	0	1	0	0	0
3319	0.75	4	0.57	3	0.93	3	0.76	4	0.5	3	1	4	22	0.753333	0.75	-0.00333333	0.679298	0.909407	1	6464486	6464818	AluY	+	Y	None	51	0.76	9	0.33	0.47	23	0.66	0.53	2480	21	0	3	333	22	175	13.21	52.55	0.97	4530	2	1	1	5	2
3522	0.84	5	0.5	4	0.71	7	0.56	7	0.86	7	0.67	3	10	0.696667	0.683333	-0.0133333	0.919564	0.997204	1	6612830	6613171	AluSx	-	S	x	0	0	11	0.38	0.49	8	0.31	0.46	2317	116	0	0	342	10	183	5.85	53.51	0.42	4672	0	0	0	2	1
3570	0.83	8	0.6	5	0.94	8	0.44	3	0.89	9	0.79	7	11	0.706667	0.79	0.0833333	0.581664	0.860781	1	6656178	6656518	AluSx	+	S	x	24	0.83	0	0	0.55	7	0.2	0.52	1947	111	3	106	341	11	182	6.45	53.37	0.47	4708	1	1	1	3	1
3597	1	3	1	3	1	4	1	5	1	4	0.83	3	11	0.943333	1	0.0566667	0.323295	0.723448	1	6671491	6671783	AluSc	+	S	c	14	0.93	11	0.36	0.49	9	0.47	0.39	2266	89	3	0	293	11	163	7.51	55.63	0.5	4728	0	0	0	4	0
3599	0.62	7	0.37	7	0.9	5	0.35	6	0.67	3	0.2	5	20	0.406667	0.63	0.223333	0.264269	0.71054	1	6672214	6672510	AluSg	-	S	g	0	0	7	0.36	0.39	25	0.93	0.48	2532	54	0	0	297	20	168	13.47	56.57	0.85	4731	0	0	0	4	2
3601	0.92	8	1	8	0.67	6	0.85	8	1	6	0.73	6	10	0.86	0.863333	0.00333333	0.92309	0.998444	1	6677168	6677437	AluSx	-	S	x	0	0	8	0.32	0.45	13	0.47	0.47	1808	130	63	0	270	10	142	7.41	52.59	0.54	4745	1	0	0	5	1
3710	0.3	8	0.46	6	0.37	9	0.74	7	0.73	7	0.78	10	15	0.75	0.376667	-0.373333	0.0069966	0.251644	1	6762194	6762491	AluSx	-	S	x	0	0	56	0.89	0.71	5	0.2	0.45	2142	87	24	20	298	15	167	10.07	56.04	0.65	4796	3	3	4	2	3
3758	0.67	6	0	3	0	4	1	9	0.7	10	0.61	12	23	0.77	0.223333	-0.546667	0.0511325	0.471129	1	6795420	6795733	AluY	+	Y	None	30	0.97	4	0.19	0.41	8	0.27	0.49	2680	32	3	13	314	23	179	14.65	57.01	0.91	4823	5	2	3	4	6
3772	0.8	5	0.88	4	0.15	4	0.77	7	0.75	8	0.92	4	12	0.813333	0.61	-0.203333	0.390304	0.741833	1	6804968	6805255	AluSp	-	S	p	0	0	9	0.33	0.47	10	0.4	0.45	2228	94	3	0	288	12	154	8.33	53.47	0.59	4833	5	4	1	1	1
3838	1	8	1	6	0.8	5	0.92	5	0.93	3	0.89	3	13	0.913333	0.933333	0.02	0.290884	0.723448	1	6841350	6841624	AluSg	+	S	g	0	0	4	0.21	0.4	5	0.23	0.42	2222	80	4	0	275	13	154	9.45	56	0.61	4851	0	0	0	1	0
3904	1	4	0.92	4	0.82	5	0.83	3	0.69	4	0.72	5	7	0.746667	0.913333	0.166667	0.0990287	0.501358	1	6920688	6920999	AluSz	+	S	z	28	0.86	0	0	0.33	10	0.36	0.47	2253	122	0	6	312	7	158	4.49	50.64	0.35	4882	0	0	0	1	0
3922	0.87	5	0.93	5	1	4	1	5	1	5	1	4	5	1	0.933333	-0.0666667	0.0930397	0.500778	1	6943020	6943251	AluSz6	-	S	z6	0	0	3	0.15	0.45	9	0.36	0.5	1656	134	13	0	232	5	126	4.31	54.31	0.29	4888	0	0	0	0	0
4322	1	3	0.75	11	1	6	0.9	10	0.98	6	0.7	10	19	0.86	0.916667	0.0566667	0.425356	0.763601	1	7695386	7695687	AluY	+	Y	None	19	1	9	0.22	0.58	10	0.29	0.53	2429	63	0	7	302	19	172	12.58	56.95	0.78	5167	0	0	0	0	0
4413	0.78	3	0.78	3	0.75	4	0.75	4	0.75	4	0.62	6	9	0.706667	0.77	0.0633333	0.444889	0.777878	1	7817545	7817815	AluSz	+	S	z	20	0.85	0	0	0.33	6	0.44	0.33	1930	92	114	0	271	9	145	6.64	53.51	0.47	5223	2	1	1	3	0
4535	0.81	3	0.58	8	0.82	4	0.78	5	0.97	8	0.62	4	13	0.79	0.736667	-0.0533333	0.502239	0.813102	1	7963464	7963748	AluSx	-	S	x	0	0	4	0.21	0.57	3	0.23	0.33	1880	135	10	10	285	13	156	9.12	54.74	0.62	5281	11	11	8	21	10
4616	0.95	4	0.93	10	1	9	1	7	1	6	1	7	11	1	0.96	-0.04	0.105193	0.506562	1	8023433	8023734	AluSx1	-	S	x1	0	0	8	0.33	0.44	9	0.33	0.47	2121	122	30	0	302	11	160	7.28	52.98	0.52	5306	0	0	0	2	1
5145	1	4	1	3	1	4	1	4	1	5	1	5	5	1	1	0	1	1	1	8461397	8461527	AluSx	+	S	x	28	0.71	6	0.33	0.38	8	0.29	0.47	685	155	0	0	131	5	65	7.63	49.62	0.62	5522	0	0	0	0	1
5148	0.88	4	1	6	1	7	0.75	8	0.81	6	1	7	13	0.853333	0.96	0.106667	0.328752	0.723448	1	8462959	8463256	AluSg	-	S	g	0	0	7	0.35	0.4	4	0.21	0.4	2390	91	0	0	298	13	167	8.72	56.04	0.56	5527	0	1	0	0	0
5430	0.71	7	1	7	0.83	7	0.97	8	0.96	8	1	3	12	0.976667	0.846667	-0.13	0.255588	0.701306	1	8784624	8784907	AluSg	+	S	g	20	0.9	2	0.19	0.29	8	0.59	0.33	2185	92	56	0	284	12	157	8.45	55.28	0.55	5622	0	0	0	0	0
5435	1	4	0.91	4	1	5	0.98	6	1	4	1	5	14	0.993333	0.97	-0.0233333	0.517762	0.82393	1	8787543	8787850	AluSc	-	S	c	0	0	17	0.49	0.53	5	0.24	0.42	2369	97	3	0	308	14	163	9.09	52.92	0.65	5627	0	0	0	0	1
5550	1	3	0.96	5	0.89	3	1	4	0.89	3	0.71	7	11	0.866667	0.95	0.0833333	0.542664	0.839202	1	8870082	8870358	AluSx1	-	S	x1	0	0	0	0	0.31	2	0.1	0.4	2094	101	22	0	277	11	157	7.94	56.68	0.5	5671	0	0	0	2	0
5568	0.94	6	1	6	0.93	5	0.94	6	0.94	6	0.86	4	11	0.913333	0.956667	0.0433333	0.263874	0.710357	1	8885547	8885853	AluSq2	+	S	q2	4	1	18	0.62	0.48	11	0.35	0.51	2137	85	0	62	307	11	169	7.17	55.05	0.47	5685	0	1	0	1	1
5579	1	4	0.97	6	0.34	6	0.72	6	0.75	8	0.87	7	9	0.78	0.77	-0.01	0.454758	0.780407	1	8890800	8891090	AluSz6	+	S	z6	20	1	8	0.34	0.44	6	0.21	0.48	1997	86	28	21	291	9	148	6.19	50.86	0.48	5689	15	3	4	7	1
5685	1	7	0.77	4	1	4	1	3	0.94	7	0.92	4	14	0.953333	0.923333	-0.03	0.869071	0.983439	1	8955553	8955851	AluSc8	+	S	c8	29	0.79	5	0.24	0.41	6	0.25	0.45	2198	110	37	0	299	14	156	9.36	52.17	0.69	5735	4	4	3	1	0
5786	1	3	0.67	3	1	3	1	4	1	4	1	4	8	1	0.89	-0.11	0.311311	0.723448	1	9024296	9024604	AluSc	-	S	c	0	0	7	0.24	0.52	12	0.35	0.54	2254	129	3	3	309	8	165	5.18	53.4	0.37	5774	1	1	1	6	1
5799	0.67	3	0.55	5	0.42	4	1	4	1	3	0.8	5	15	0.933333	0.546667	-0.386667	0.0190171	0.351699	1	9032452	9032773	AluY	+	Y	None	32	0.81	5	0.22	0.44	8	0.34	0.44	2321	81	0	40	322	15	179	9.32	55.59	0.61	5783	3	3	1	3	1
6441	0.83	5	1	3	0.56	3	0.61	3	1	3	0.33	3	8	0.646667	0.796667	0.15	0.713667	0.924717	1	9566763	9567058	AluSx1	+	S	x1	23	0.87	19	0.53	0.54	6	0.22	0.47	2245	101	27	0	296	8	153	5.41	51.69	0.41	6118	1	0	0	2	1
6575	0.97	5	1	5	0.87	5	1	5	1	5	0.96	6	8	0.986667	0.946667	-0.04	0.388445	0.74053	1	9637234	9637568	AluSz	+	S	z	32	0.81	7	0.33	0.42	9	0.29	0.52	1606	104	66	134	335	8	175	4.78	52.24	0.36	6174	0	0	1	1	0
6628	1	3	0.72	3	0	4	0.89	3	0.78	3	1	3	19	0.89	0.573333	-0.316667	0.384416	0.737241	1	9683337	9683646	AluYa5	+	Y	a5	29	0.97	14	0.5	0.48	5	0.19	0.46	2814	19	0	0	310	19	172	12.26	55.48	0.8	6216	0	1	0	6	2
7081	1	7	0.89	12	1	5	0.86	7	0.74	10	0.78	5	16	0.793333	0.963333	0.17	0.0296656	0.403743	1	9971493	9971780	AluSz	-	S	z	0	0	7	0.29	0.44	15	0.5	0.49	2212	90	24	0	288	16	163	11.11	56.6	0.7	6430	1	1	0	10	3
7295	0.98	5	1	4	1	3	0.81	4	0.96	5	1	3	8	0.923333	0.993333	0.07	0.195983	0.629678	1	10067824	10068125	AluSx1	+	S	x1	14	1	5	0.26	0.39	10	0.34	0.49	2082	122	0	23	302	8	160	5.3	52.98	0.38	6498	2	1	0	2	0
7411	1	6	1	9	1	6	0.68	8	1	5	1	6	12	0.893333	1	0.106667	0.31175	0.723448	1	10128396	10128708	AluSx	-	S	x	0	0	7	0.22	0.51	4	0.17	0.44	2284	121	0	3	313	12	170	7.67	54.31	0.52	6554	0	0	0	2	1
7640	0.97	6	0.86	7	0.9	8	1	8	0.94	8	1	5	10	0.98	0.91	-0.07	0.103338	0.506562	1	10268392	10268712	AluSz6	-	S	z6	0	0	4	0.17	0.44	15	0.55	0.47	2170	97	3	40	321	10	161	6.23	50.16	0.5	6633	0	0	0	1	0
7651	1	4	0.74	3	0.83	3	0.44	3	0.83	3	1	3	8	0.756667	0.856667	0.1	0.795015	0.957977	1	10278484	10278778	AluSz	-	S	z	0	0	2	0.09	0.44	8	0.69	0.31	2306	108	0	0	295	8	150	5.42	50.85	0.42	6641	0	1	1	2	3
7937	0.83	6	1	6	1	8	0.88	8	0.92	6	0.93	7	11	0.91	0.943333	0.0333333	0.234619	0.676208	1	10477770	10478067	AluSq2	-	S	q2	0	0	9	0.29	0.5	14	0.8	0.37	2221	117	0	7	298	11	156	7.38	52.35	0.54	6734	0	0	0	1	1
8035	0.92	6	1	7	1	7	1	4	0.9	8	1	6	11	0.966667	0.973333	0.00666667	0.936586	1	1	10529884	10530170	AluSg7	-	S	g7	0	0	11	0.4	0.47	10	0.44	0.43	2068	112	70	0	287	11	147	7.67	51.22	0.59	6767	0	0	0	0	0
8178	1	3	1	4	1	3	1	3	1	4	0.83	4	11	0.943333	1	0.0566667	0.323295	0.723448	1	10660195	10660489	AluSq	+	S	q	11	0.91	5	0.32	0.36	16	0.56	0.48	2366	78	0	3	295	11	162	7.46	54.92	0.5	6825	0	0	0	1	0
8451	0.75	8	0.95	9	1	9	0.92	8	0.96	6	0.97	9	13	0.95	0.9	-0.05	0.880019	0.986305	1	10996375	10996674	AluSx	+	S	x	19	0.79	4	0.13	0.49	10	0.44	0.43	2260	110	3	0	300	13	165	8.67	55	0.58	7159	0	1	0	6	3
8835	1	3	1	6	0.93	7	0.69	7	0.94	8	0.67	3	14	0.766667	0.976667	0.21	0.032305	0.415865	1	11277454	11277767	AluY	-	Y	None	0	0	1	0.07	0.33	7	0.34	0.41	2267	64	0	64	314	14	168	8.92	53.5	0.64	7329	0	0	0	1	0
8892	0.95	7	0.44	12	0.3	10	0.67	12	0.57	8	0.44	11	18	0.56	0.563333	0.00333333	0.747395	0.939436	1	11323246	11323542	AluSx	+	S	x	2	1	22	0.86	0.45	13	0.53	0.44	2015	88	10	54	297	18	176	12.12	59.26	0.69	7351	1	1	1	6	4
9013	0.94	4	0.71	3	0.7	5	0.79	4	0.83	4	0.7	4	7	0.773333	0.783333	0.01	0.724331	0.930216	1	11413593	11413890	AluSz	-	S	z	0	0	7	0.2	0.53	5	0.17	0.48	2040	148	17	3	298	7	149	4.7	50	0.38	7401	7	5	4	9	5
9224	0.8	5	0.25	4	0.46	4	0.92	7	0.42	6	0.67	6	12	0.67	0.503333	-0.166667	0.401259	0.750069	1	11622440	11622741	AluSx	+	S	x	30	0.87	0	0	0.37	6	0.2	0.5	2059	106	33	0	302	12	167	7.95	55.3	0.52	7514	0	1	0	26	8
9240	0.83	3	0.37	3	0.67	3	0.93	3	0.82	3	0.81	3	3	0.853333	0.623333	-0.23	0.126302	0.532593	1	11636836	11636935	AluJb	+	J	b	1	1	14	0.34	0.58	14	0.41	0.52	1638	148	43	54	100	3	59	6	59	0.35	7524	4	4	2	11	14
9751	1	8	0.8	5	0.67	6	0.92	6	1	6	0.94	7	11	0.953333	0.823333	-0.13	0.434782	0.770337	1	12003344	12003653	AluSq2	-	S	q2	0	0	8	0.23	0.53	7	0.2	0.54	2357	113	0	0	310	11	160	7.1	51.61	0.54	7798	0	0	0	0	1
9821	0.67	9	0.07	8	0.64	7	0.67	6	1	6	0.69	6	13	0.786667	0.46	-0.326667	0.150044	0.565547	1	12041280	12041526	AluSx	+	S	x	0	0	14	0.46	0.5	7	0.26	0.47	1895	73	28	0	247	13	149	10.53	60.32	0.58	7827	2	2	1	12	2
9879	0.76	8	0.96	6	0.95	5	0.81	7	1	4	0.9	7	17	0.903333	0.89	-0.0133333	0.767542	0.948148	1	12080735	12081031	AluSx	-	S	x	0	0	6	0.21	0.48	13	0.43	0.49	2210	104	0	7	297	17	170	11.45	57.24	0.71	7848	1	0	0	3	1
9886	0.93	5	1	5	1	4	1	4	1	3	0.87	5	11	0.956667	0.976667	0.02	0.830518	0.970335	1	12083771	12084074	AluSg	+	S	g	23	0.78	15	0.55	0.47	11	0.38	0.48	2364	99	0	0	304	11	160	7.24	52.63	0.53	7851	1	1	1	1	0
10011	0.88	8	0.83	8	0.69	6	1	3	1	6	0.83	6	15	0.943333	0.8	-0.143333	0.0751825	0.500778	1	12178900	12179220	AluSg	-	S	g	0	0	11	0.41	0.47	4	0.16	0.45	2324	79	0	3	321	15	173	9.35	53.89	0.65	7915	1	1	1	4	1
10172	0.86	7	1	5	1	4	0.9	5	1	7	0.8	5	11	0.9	0.953333	0.0533333	0.46326	0.785714	1	12307215	12307486	AluSz	+	S	z	13	1	6	0.3	0.41	11	0.57	0.39	1991	96	37	15	272	11	146	8.09	53.68	0.57	7994	1	0	0	1	0
10183	0.58	6	0.67	3	0.4	5	0.69	5	1	5	1	3	12	0.896667	0.55	-0.346667	0.0408612	0.441125	1	12315001	12315301	AluSx	-	S	x	0	0	9	0.39	0.43	7	0.43	0.37	2433	90	0	0	301	12	162	7.97	53.82	0.55	8000	0	1	0	0	0
10400	1	3	0.67	4	1	5	0.8	5	0.83	3	0.93	5	9	0.853333	0.89	0.0366667	0.279229	0.723448	1	12581790	12582100	AluSq2	-	S	q2	0	0	6	0.28	0.41	8	0.34	0.44	2160	132	6	10	311	9	156	5.79	50.16	0.47	8061	1	2	1	4	1
10486	1	4	0.8	5	0.93	3	0.85	4	0.75	4	0.75	6	14	0.783333	0.91	0.126667	0.137988	0.551932	1	12657109	12657389	AluSg4	-	S	g4	0	0	6	0.15	0.57	5	0.19	0.46	2327	60	0	7	281	14	166	9.96	59.07	0.58	8110	0	0	0	3	0
11596	1	6	0.83	5	0.71	7	0.33	6	1	4	0.29	8	17	0.54	0.846667	0.306667	0.4936	0.807364	1	13857357	13857661	AluY	+	Y	None	10	1	16	0.52	0.5	9	0.34	0.47	2441	43	0	46	305	17	172	11.15	56.39	0.71	8464	0	0	0	0	0
11640	0.8	10	0.69	8	0.69	8	0.9	8	1	9	0.97	7	20	0.956667	0.726667	-0.23	0.0158971	0.330714	1	13901056	13901397	AluY	-	Y	None	0	0	11	0.41	0.47	3	0.14	0.42	2306	51	0	31	342	20	174	11.7	50.88	0.91	8487	0	0	0	0	0
12049	0.8	3	0.97	6	0.86	7	0.8	5	0.86	7	0.73	4	16	0.796667	0.876667	0.08	0.269694	0.716623	1	14501595	14501897	AluY	-	Y	None	0	0	4	0.2	0.4	7	0.39	0.41	2523	76	0	0	303	16	170	10.56	56.11	0.68	8655	0	0	0	0	0
12101	1	3	1	5	1	3	1	5	0.97	5	1	4	11	0.99	1	0.01	0.455388	0.780407	1	14606576	14606893	AluSc8	+	S	c8	28	1	7	0.26	0.47	6	0.23	0.45	2494	72	0	28	318	11	166	6.92	52.2	0.51	8672	1	3	0	3	2
12265	0.75	4	0.67	3	0.5	5	0.5	4	0.81	3	0.83	6	11	0.713333	0.64	-0.0733333	0.532823	0.832946	1	14874100	14874357	AluY	-	Y	None	0	0	3	0.21	0.34	8	0.34	0.43	2018	78	0	27	258	11	144	8.53	55.81	0.56	8734	0	0	0	0	0
12464	0.9	7	0.71	10	1	9	0.93	12	0.94	9	0.9	10	15	0.923333	0.87	-0.0533333	0.961264	1	1	15095854	15096149	AluSq2	-	S	q2	0	0	6	0.24	0.45	6	0.21	0.49	2290	101	3	0	296	15	162	10.14	54.73	0.69	8810	0	1	0	0	1
12568	0.78	6	0.86	7	0.62	8	1	4	1	5	1	8	13	1	0.753333	-0.246667	0.000551591	0.115334	1	15190779	15191077	AluSx1	+	S	x1	19	0.84	3	0.11	0.48	7	0.23	0.49	2326	84	10	0	299	13	165	8.7	55.18	0.58	8848	1	1	0	2	1
12669	0.88	4	0.75	4	0.83	6	0.8	5	1	5	1	7	12	0.933333	0.82	-0.113333	0.102266	0.50456	1	15267396	15267711	AluSx	-	S	x	0	0	6	0.16	0.55	6	0.19	0.5	2307	89	3	25	316	12	164	7.59	51.9	0.57	8898	1	0	0	0	1
13138	1	6	0.96	6	0.97	7	0.92	6	1	7	0.97	6	7	0.963333	0.976667	0.0133333	0.749804	0.939859	1	15693725	15693927	AluSx	+	S	x	0	0	3	0.11	0.47	9	0.23	0.56	1489	103	0	0	203	7	110	6.9	54.19	0.47	9119	2	0	0	3	1
13139	1	4	0.88	4	0.6	5	1	3	0.78	3	0.92	4	8	0.9	0.826667	-0.0733333	0.763734	0.946642	1	15694452	15694769	AluSz	-	S	z	0	0	8	0.22	0.55	5	0.19	0.46	2100	110	0	19	318	8	168	5.03	52.83	0.36	9122	0	0	0	0	0
13422	1	7	1	8	0.75	4	0.67	3	0.98	6	0.75	4	13	0.8	0.916667	0.116667	0.307992	0.723448	1	15882716	15883018	AluSx	-	S	x	0	0	10	0.38	0.46	1	0.08	0.32	1945	93	52	11	303	13	164	8.58	54.13	0.59	9230	0	0	0	1	0
13449	0.67	9	0.97	4	1	3	1	3	0.67	3	0.86	3	14	0.843333	0.88	0.0366667	0.715517	0.925831	1	15903233	15903544	AluYk4	-	Y	k4	0	0	15	0.41	0.54	11	0.38	0.48	2638	67	0	3	312	14	159	8.97	50.96	0.71	9238	0	1	0	1	1
13573	0.89	3	1	3	1	3	1	4	1	5	1	4	6	1	0.963333	-0.0366667	0.335911	0.723448	1	15974179	15974467	AluSx3	+	S	x3	8	1	9	0.35	0.46	1	0.06	0.35	1769	170	0	14	289	6	146	4.15	50.52	0.33	9284	0	0	0	1	0
13940	0.67	6	0.55	6	0.93	3	0.78	6	0.7	6	0.72	6	6	0.733333	0.716667	-0.0166667	0.845746	0.977125	1	16185149	16185459	AluJb	+	J	b	21	0.86	3	0.13	0.43	6	0.33	0.38	1647	186	3	29	311	6	162	3.86	52.09	0.28	9469	0	1	0	4	3
14043	1	11	0.82	9	0.96	7	0.89	9	0.89	12	0.92	9	15	0.9	0.926667	0.0266667	0.33483	0.723448	1	16244716	16245013	AluSq2	-	S	q2	0	0	1	0.06	0.36	4	0.34	0.31	2098	131	27	0	298	15	149	10.07	50	0.81	9502	0	0	0	0	0
14056	1	5	1	4	0.97	5	0.97	5	1	4	1	4	5	0.99	0.99	0	1	1	1	16264609	16264910	AluSz	-	S	z	0	0	12	0.29	0.58	6	0.21	0.48	1968	122	20	40	302	5	163	3.31	53.97	0.23	9510	0	0	0	3	1
14361	0.86	7	0.92	4	0.76	6	0.88	5	1	5	0.68	6	11	0.853333	0.846667	-0.00666667	0.573734	0.856284	1	16509352	16509646	AluSx1	+	S	x1	33	0.73	8	0.24	0.52	15	0.47	0.51	2322	78	20	3	295	11	161	7.46	54.58	0.5	9685	0	0	0	6	1
14471	0.91	6	0.77	7	0.83	6	0.9	5	0.82	7	1	6	9	0.906667	0.836667	-0.07	0.290738	0.723448	1	16595177	16595406	AluSp	+	S	p	0	0	0	0	0.39	13	0.42	0.5	1514	91	0	91	230	9	121	7.83	52.61	0.57	9728	0	0	0	0	0
14527	0.8	3	0.69	3	0.83	3	0.87	3	0.83	4	0.97	4	13	0.89	0.773333	-0.116667	0.151048	0.567347	1	16624075	16624380	AluY	+	Y	None	19	1	5	0.21	0.44	8	0.28	0.48	2410	72	0	20	306	13	166	8.5	54.25	0.58	9748	0	0	0	1	0
14639	1	4	0.8	5	1	5	0.93	5	0.79	6	1	4	12	0.906667	0.933333	0.0266667	0.609421	0.876031	1	16674913	16675219	AluSx1	+	S	x1	24	0.88	9	0.57	0.36	1	0.07	0.34	2258	91	10	16	307	12	162	7.82	52.77	0.58	9773	3	2	2	4	1
14695	0.8	5	0.8	9	0.95	5	0.67	9	1	7	0.72	12	17	0.796667	0.85	0.0533333	0.889464	0.989036	1	16701368	16701670	AluSg	-	S	g	0	0	4	0.16	0.44	12	0.42	0.48	2419	92	0	0	303	17	167	11.22	55.12	0.74	9798	4	3	2	2	1
14709	0.57	7	0.97	6	1	6	1	4	1	6	0.57	7	13	0.856667	0.846667	-0.01	0.833536	0.971827	1	16706962	16707262	AluSp	-	S	p	0	0	6	0.22	0.47	5	0.19	0.46	2283	100	3	10	301	13	164	8.64	54.49	0.58	9800	0	0	0	0	0
14748	1	3	1	3	1	3	1	3	1	3	0.83	3	5	0.943333	1	0.0566667	0.323295	0.723448	1	16732607	16732778	AluSx	-	S	x	0	0	4	0.13	0.5	5	0.19	0.46	1170	157	0	0	172	5	91	5.81	52.91	0.42	9818	1	2	1	1	3
15165	0.17	6	0	4	0.45	7	0	9	0.43	7	0	8	21	0.143333	0.206667	0.0633333	0.5677	0.854056	1	17230521	17230805	AluYc3	-	Y	c3	0	0	4	0.21	0.39	11	0.5	0.42	2329	42	3	14	285	21	164	14.74	57.54	0.91	9995	3	1	1	4	1
15527	1	7	0.9	5	0.92	3	0.92	6	0.89	7	0.96	8	13	0.923333	0.94	0.0166667	0.543753	0.839739	1	17472575	17472862	AluSc	-	S	c	0	0	3	0.14	0.42	3	0.12	0.45	2061	94	38	0	288	13	152	9.03	52.78	0.65	10128	0	1	0	2	1
15871	0.8	5	0.71	4	1	3	1	3	1	4	1	3	11	1	0.836667	-0.163333	0.0754761	0.500778	1	17759308	17759483	AluY	+	Y	None	30	0.87	3	0.08	0.55	15	0.6	0.45	1360	97	0	0	176	11	99	12.5	56.25	0.81	10264	2	2	2	5	2
15917	0.67	3	0.69	4	1	4	1	5	1	7	1	5	8	1	0.786667	-0.213333	0.071928	0.500778	1	17783313	17783605	AluSz	-	S	z	0	0	12	0.41	0.48	6	0.25	0.44	2115	119	24	0	293	8	149	5.46	50.85	0.42	10296	0	1	0	1	0
15922	1	3	0.85	4	0.83	3	0.72	4	1	3	1	5	11	0.906667	0.893333	-0.0133333	0.613415	0.877829	1	17784754	17785053	AluSq2	-	S	q2	0	0	15	0.44	0.53	3	0.14	0.44	2386	76	7	7	300	11	162	7.33	54	0.51	10299	1	0	0	1	0
[truncated: 9,859 more rows]
[truncated: 23 more columns]
