# Supplementary material for: The epigenetic landscape of Alu repeats delineates the structural and functional genomic architecture of colon cancer cells
Source: HighWire-hosted journal article supplement (doi:10.1101/gr.207522.116), 2016-12-20
Supplement: Supplemental_Data_S4.xlsx [file Supplemental_Data_S4.xlsx]

## Sheet: Description
Supplemental Data S4. Copy number variations detected by CGH and non canonical NSUMA reads
Mireia Jordà et al.
Field	description
chrom	chromosome
loc.start	segment start position
loc.end	segment end position
num.mark	number of informative marks in the segment
seg.mean	mean of the differential copy number

## Sheet: CGH 369T
chrom	loc.start	loc.end	num.mark	seg.mean
1	564423	44413758	7189	-0.1718
1	44418497	44422722	2	-0.9043
1	44427067	121350870	11488	-0.2154
1	142617942	145291710	49	-0.182
1	145382361	249218732	16063	0.2779
2	17018	91906583	13006	0.0833
2	95420437	96432288	114	0.0012
2	96604288	96610886	2	-0.8044
2	96739307	128450326	3875	0.0075
2	128452003	128452003	5	0.4304
2	128454885	130688818	224	0.0031
2	130701774	130748581	7	-0.4637
2	130759604	243041304	16073	0.0019
3	62074	43771204	6313	-0.317
3	43776375	43833978	4	-0.8363
3	43853414	90309007	6763	-0.3094
3	93538466	197845194	15047	-0.2588
4	45881	68158	5	-0.8142
4	71551	49083230	6151	-0.2547
4	52689100	190896614	17550	-0.2199
4	190896841	190916618	2	0.167
5	26141	46115026	5610	0.2823
5	49559919	180712203	17439	-0.1002
6	154129	58713014	9215	0.2224
6	61971891	84785342	2875	0.1683
6	84789263	124794888	5108	-0.2246
6	124801563	124890371	19	-0.4946
6	124895022	170911180	6909	-0.2182
7	44943	1973434	272	0.39
7	1976965	1981049	2	1.6003
7	1987001	17373667	2257	0.3434
7	17378910	17385387	7	0.7692
7	17388311	57621359	5603	0.3414
7	62452970	152093656	14973	0.3293
7	152101332	152112211	3	-0.6112
7	152116971	159118506	1120	0.3717
8	161471	43527905	6164	-0.2986
8	46939153	126814272	10316	0.4974
8	126818935	129093933	302	1.6399
8	129098276	129261356	33	0.1343
8	129281104	129395925	7	1.3636
8	129405672	129599580	15	0.2359
8	129630430	129679309	3	1.4398
8	129697600	131428197	245	0.1401
8	131435893	131442045	2	1.8928
8	131451827	146294041	2057	0.1592
9	204192	47212366	5438	0.0353
9	66505288	68437351	8	-0.3551
9	68453025	108191947	5330	0.0456
9	108197016	108197016	4	-0.4531
9	108200666	141025861	5462	0.1066
10	136360	39076531	5824	0.044
10	42651598	46169816	441	-0.0314
10	46968071	47702527	55	-0.453
10	48326209	53564374	637	-0.035
10	53568581	53643414	14	-0.5301
10	53650085	127573287	11095	-0.0356
10	127576582	127601626	6	-0.6865
10	127608434	135434118	1146	-0.0433
11	200214	51511401	7229	0.0352
11	55028486	58597404	579	-0.2132
11	58597404	58597404	4	-0.7029
11	58601509	102239688	6617	-0.1789
11	102249284	102261719	7	-0.6052
11	102265215	134945105	5000	-0.1307
12	87495	34756149	5278	0.0286
12	37958139	133779016	14066	0.0105
13	19296543	114290671	13490	0.8934
13	114292989	114292989	5	0.1062
13	114295822	115107185	110	1.0608
14	19376761	20420789	35	-0.639
14	20427182	107287445	13640	-0.1441
15	20102540	40674818	2574	-0.2261
15	40678691	40684242	6	-0.5999
15	40687777	102480828	10881	-0.2026
16	93627	35147448	4764	0.0946
16	46500740	88526839	5982	0.094
16	88534207	88540331	2	1.346
16	88544158	90163069	315	0.1351
17	47545	22218385	3618	-0.2917
17	25375448	81108002	9094	0.0438
18	14315	15072734	2206	-0.2369
18	18529850	78009972	7642	-0.2381
19	259394	24366014	4473	0.0955
19	27853206	59095358	5440	0.0984
20	67777	26199111	3898	0.2378
20	26200763	26225122	7	-0.6026
20	29633751	29652451	4	-0.3484
20	29833608	62908614	5357	0.5141
21	9832447	9834622	18	-0.8656
21	10861050	11145541	18	-0.262
21	14640391	14960388	22	-0.1007
21	14968457	15070237	5	-0.4634
21	15125364	48098543	5737	0.0142
22	16486085	51224201	7069	-0.195
23	61090	305721	48	-0.105
23	308308	314429	4	0.8453
23	316343	58482330	8541	0.2781
23	61931688	155257081	11545	0.2835
24	2668327	10035499	63	-0.0194
24	13213475	28779351	121	-0.0375
24	59002343	59031420	4	-0.8113

## Sheet: CGH 544T
chrom	loc.start	loc.end	num.mark	seg.mean
1	564423	1999213	191	0.2414
1	2006258	2013418	2	2.1339
1	2017425	2771707	120	0.1587
1	2777395	2780508	2	2.016
1	2785041	93639246	14511	0.0629
1	93645076	93645076	5	1.2301
1	93648631	120529669	3808	0.0677
1	120536871	120602632	8	0.4735
1	120608763	121350870	32	0.0832
1	142617942	228127480	12671	0.0745
1	228132539	228136981	2	2.6646
1	228140915	249218732	3439	0.0761
2	17018	1814462	289	0.0558
2	1818283	1821557	2	1.4971
2	1825994	34663095	4594	0.0622
2	34670839	34730082	12	-0.6677
2	34738176	42171908	1343	0.0679
2	42177255	42333407	27	0.6253
2	42342991	49531840	1227	0.0751
2	49545370	51908559	339	-0.6387
2	51924848	81488404	4277	0.0656
2	81509932	81509932	5	1.2336
2	81532580	85962377	466	0.0489
2	85965310	85965310	5	-0.5173
2	85971618	90265059	409	0.064
2	91693394	91906583	11	0.4163
2	95420437	132649660	4373	0.0527
2	132661347	133009620	4	0.5612
2	133019185	186342876	7568	0.0584
2	186356368	186500762	14	-0.4218
2	186507656	220314843	4988	0.0935
2	220321275	223076286	271	-0.5875
2	223082540	239028680	2413	0.116
2	239034165	239038261	2	1.3731
2	239044718	240575605	253	0.1127
2	240583545	242522127	347	-0.5105
2	242710412	243041304	67	0.1383
3	62074	39129166	5602	0.0632
3	39132536	39324182	36	0.6388
3	39329610	54980759	2755	0.0607
3	54985523	54988033	2	-0.746
3	54996386	60387542	880	0.0709
3	60392872	60458618	14	-0.7459
3	60462819	90309007	3791	0.0541
3	93538466	172528511	11187	0.0753
3	172538343	172538343	5	-0.488
3	172545534	174694490	337	0.0717
3	174702823	174845133	30	-0.5197
3	174854796	184321289	1282	0.0619
3	184327382	184540584	30	0.5165
3	184548546	197845194	2176	0.0939
4	45881	1613851	251	0.1868
4	1617893	1643325	6	1.5868
4	1652606	49083230	5899	0.0671
4	52689100	134396444	10393	0.0768
4	134423645	135068792	50	-0.6514
4	135087815	181054158	5732	0.074
4	181080213	181395476	23	1.0816
4	181402095	190916618	1354	0.073
5	26141	480458	69	-0.1814
5	486499	489755	2	2.4343
5	493202	46115026	5539	-0.2694
5	49559919	162012616	14847	-0.2464
5	162023266	168449496	689	-0.6513
5	168454336	171207172	477	0.3177
5	171215065	171288510	9	1.1171
5	171294651	177759470	897	0.3826
5	177764410	177776405	3	1.5458
5	177780866	180712203	517	0.3466
6	154129	43086790	6948	-0.2517
6	43094771	43252435	31	0.3683
6	43255802	58713014	2236	-0.2207
6	61971891	92842071	3902	-0.2366
6	92853471	113187872	2587	-0.8871
6	113206349	162054373	7103	-0.2431
6	162063086	162324733	56	-0.9957
6	162328279	168768831	944	-0.2381
6	168776872	168785435	2	1.1695
6	168790770	170911180	317	-0.2305
7	44943	27627347	4020	0.3583
7	27631452	27746239	20	1.0954
7	27759750	57621359	4101	0.3294
7	62452970	100275886	5170	0.3229
7	100279057	100283465	2	2.2661
7	100286616	111686296	2138	0.3298
7	111692631	127187666	2948	-0.2849
7	127193663	128492342	253	0.3142
7	128495620	128499015	2	1.543
7	128504577	150651100	4174	0.3159
7	150655712	150655712	5	1.5436
7	150659771	159118506	1404	0.3406
8	161471	42160779	5977	-0.6204
8	42167647	43527905	187	0.0921
8	46939153	124449409	9924	0.7046
8	124453739	124457201	6	0.2068
8	124464076	125293304	153	0.9428
8	125301319	126328458	173	0.0131
8	126338540	126419046	17	1.3598
8	126424800	127672496	141	0.8417
8	127678534	130791897	386	1.5385
8	130798857	144990159	1974	0.3871
8	144993092	145021160	10	1.5874
8	145022517	146294041	196	0.3982
9	204192	5775568	907	0.0403
9	5779131	5908257	27	-0.6889
9	5913344	47212366	4504	0.0356
9	66505288	68437351	8	0.4034
9	68453025	114111050	6205	0.0517
9	114117228	114496631	81	0.6886
9	114500246	131002625	2696	0.0505
9	131004695	131018721	6	-0.3458
9	131023779	131770354	162	0.0445
9	131775304	131775304	5	0.68
9	131782125	134027113	373	0.0223
9	134034781	134315595	52	0.5923
9	134322415	137328588	542	0.0484
9	137332374	137332374	5	2.9092
9	137337883	139407169	351	0.1064
9	139410338	139659614	56	0.7228
9	139665147	141025861	262	0.0977
10	136360	39076531	5824	-0.4887
10	42651598	56313982	1492	-0.1289
10	56319907	56329863	7	-0.6851
10	56335499	135434118	11895	-0.1067
11	200214	1257683	206	-0.4743
11	1262637	2207946	191	0.7663
11	2211813	2397122	30	1.5772
11	2406189	2889226	80	0.5759
11	2892651	3216114	67	-0.5791
11	3219856	3398247	17	0.7522
11	3406278	4189929	101	-0.5825
11	4201498	5145582	157	0.6414
11	5148864	5247722	20	-0.15
11	5254132	5626662	79	-0.6403
11	5632224	12725465	1282	0.6525
11	12729192	51511401	4999	0.0743
11	55028486	129090447	11236	0.0666
11	129101274	129260698	26	0.7898
11	129264467	134945105	945	0.0462
12	87495	12054433	2025	0.0225
12	12058334	12245897	29	0.6147
12	12248795	34756149	3224	0.0463
12	37958139	54793129	2631	0.0328
12	54797055	54802853	6	-0.5717
12	54806819	133281532	11329	0.0368
12	133287025	133294644	3	1.6305
12	133297807	133779016	97	0.0524
13	19296543	73567930	7770	0.4974
13	73572935	73572935	5	1.1254
13	73578274	115107185	5830	0.5001
14	19376761	33444330	2060	-0.5827
14	33449233	33691999	57	0.6872
14	33695427	34753108	171	-0.5955
14	34766773	43638817	1168	0.0854
14	43664745	44457367	49	-0.4985
14	44477373	100466223	8857	0.0795
14	100475199	100571168	26	0.731
14	100573503	105915676	1096	0.1203
14	105919631	105970011	16	0.8784
14	105974325	107287445	175	0.0795
15	20102540	90653990	11595	0.0686
15	90659369	90808316	30	0.5879
15	90811557	102480828	1836	0.0691
16	93627	6428449	1135	0.0153
16	6434140	6773517	64	-0.862
16	6776592	33961184	3470	-0.146
16	34197412	35147448	95	-0.648
16	46500740	90163069	6299	-0.5972
17	47545	22218385	3618	-0.6067
17	25375448	36857758	1917	0.0364
17	36862719	36862719	5	0.8449
17	36870210	62179853	4114	0.0109
17	62185156	62238198	11	0.6472
17	62248407	78851308	2645	-0.1502
17	78857418	80796218	343	0.4682
17	80802626	81108002	59	-0.1935
18	14315	11753635	1771	-0.5916
18	11759222	14158062	392	0.8648
18	14206223	15072734	43	0.2878
18	18529850	20981332	383	0.3457
18	20985858	21019953	7	1.0179
18	21023216	22093286	219	0.4065
18	22102017	22392131	22	-0.6267
18	22400124	23978245	200	0.073
18	23987364	78009972	6811	-0.5838
19	259394	2711081	500	-0.0889
19	2716702	2721801	2	2.4326
19	2725631	24366014	3971	-0.2572
19	27853206	45566023	2716	-0.2737
19	45570899	45785145	44	0.3193
19	45790513	55577463	1973	-0.258
19	55583391	55728755	31	0.4587
19	55731914	59095358	676	-0.2695
20	67777	26225122	3905	0.0585
20	29633751	30578465	141	0.5285
20	30586186	33143387	495	0.0955
20	33148089	33148326	2	2.5667
20	33152399	60444240	4228	0.0797
20	60450614	60455405	2	1.3367
20	60458838	62908614	493	0.1637
21	9832447	11145541	36	0.2542
21	14640391	45384572	5163	0.0548
21	45387379	45393476	3	1.9713
21	45400856	48098543	598	0.1053
22	16486085	20225971	628	-0.1222
22	20228242	20229923	2	1.7441
22	20231580	39977719	4077	-0.0093
22	39985868	39993067	2	1.6437
22	39997732	51224201	2360	-0.097
23	61090	182210	20	-0.6096
23	184527	194945	5	0.301
23	198277	1530141	356	-0.5515
23	1530321	1542286	5	0.2197
23	1544421	58482330	8207	-0.5809
23	61931688	155257081	11545	-0.5765
24	2668327	10035499	63	-0.1658
24	13213475	59031420	125	-0.1487

## Sheet: CGH 557T
chrom	loc.start	loc.end	num.mark	seg.mean
1	564423	41821370	6732	-0.0704
1	41829136	41832400	2	-0.8518
1	41838243	95019422	8361	-0.0428
1	95028912	95061703	7	-0.4084
1	95071343	121350870	3577	-0.0386
1	142617942	249218732	16112	-0.0443
2	17018	65093116	9676	-0.0478
2	65101227	65110144	2	-0.6737
2	65113628	77946598	1973	-0.0514
2	77965259	77989984	3	-0.8403
2	77998743	85962377	927	-0.0766
2	85965310	85965310	5	-0.7433
2	85971618	91906583	420	-0.0107
2	95420437	132649660	4373	-0.0529
2	132661347	133114056	18	0.4861
2	133127580	133269082	24	-0.1606
2	133272441	133276758	2	-0.7824
2	133282219	145500587	1843	-0.0753
2	145505830	145515123	6	-0.4619
2	145526622	174605411	3987	-0.0253
2	174630985	174630985	5	0.5131
2	174646812	243041304	10042	-0.0442
3	62074	20061432	3087	-0.0558
3	20064823	20099997	9	-0.7015
3	20105969	20287110	31	-0.0988
3	20301524	20321418	4	-0.576
3	20326085	48600889	4017	-0.0425
3	48603038	48630601	7	-0.3492
3	48633794	60411077	2125	-0.0432
3	60416592	60442256	6	-0.8694
3	60445745	71266616	1601	-0.0424
3	71273313	71434265	35	-0.5587
3	71441155	75397168	518	-0.0408
3	75700564	75720662	5	0.4747
3	75762755	90309007	1635	-0.0571
3	93538466	172528511	11187	-0.0321
3	172538343	172538343	5	-0.7293
3	172545534	175268422	451	-0.0578
3	175273006	175393874	22	-0.5798
3	175397431	197845194	3382	-0.0254
4	45881	3535699	615	-0.0775
4	3574455	3631753	14	0.3757
4	3636833	49083230	5527	-0.0631
4	52689100	91310603	5106	-0.0338
4	91318557	91618802	55	-0.5099
4	91627773	92209917	87	-0.0464
4	92214035	92234617	4	-0.7198
4	92240522	190916618	12300	-0.0427
5	26141	21453180	2692	0.1171
5	21457747	21558869	6	0.5163
5	21565095	46115026	2912	0.1502
5	49559919	180410253	17379	0.1454
5	180418511	180426370	3	1.1319
5	180429735	180712203	57	0.1143
6	154129	3975545	654	0.417
6	3984731	4177872	40	-0.0593
6	4187813	58713014	8521	0.3963
6	61971891	162640521	13712	0.394
6	162646832	162856110	40	-0.3657
6	162861995	170911180	1159	0.3707
7	44943	57375943	8115	-0.0448
7	57384668	57427041	5	0.4183
7	57438141	57621359	21	-0.0038
7	62452970	110627481	7100	-0.0422
7	110630418	110863680	50	-0.5159
7	110867620	159118506	8946	-0.0432
8	161471	31297976	4490	-1.0553
8	31311614	43527905	1674	-0.0773
8	46939153	59339680	1490	0.7573
8	59342641	59342641	5	0.1857
8	59347715	114000868	7130	0.777
8	114006906	114006906	5	0.0122
8	114012484	146294041	4350	0.7504
9	204192	32341956	4330	0.911
9	32348694	32399566	11	0.429
9	32408613	47212366	1097	0.8985
9	66505288	69194068	10	0.413
9	70984480	95146548	3389	-0.5703
9	95152392	95228714	16	-1.2178
9	95232077	95299558	12	-0.595
9	95303069	95311960	2	-1.6027
9	95313564	141025861	7375	-0.5882
10	136360	39076531	5824	-0.0464
10	42651598	93780359	6868	-0.0575
10	93789876	93831957	9	0.3702
10	93838355	94138396	51	-0.0109
10	94153331	94199331	8	0.4251
10	94202911	135434118	6458	-0.0628
11	200214	51511401	7229	-0.0685
11	55028486	134945105	12207	-0.0766
12	87495	34345525	5269	-0.0423
12	34359979	34371569	3	-0.6601
12	34382905	34756149	6	-0.1423
12	37958139	54764729	2624	-0.0429
12	54769384	54797055	12	-0.4193
12	54802853	133779016	11430	-0.0495
13	19296543	21868261	423	1.5317
13	21872030	21930656	16	0.942
13	21933697	69240910	6797	1.5464
13	69246262	69263712	5	-0.2531
13	69271955	115107185	6364	1.5516
14	19376761	49635371	4070	-0.5632
14	49659404	49777336	10	-1.4672
14	49789135	106778422	9503	-0.5758
14	106785926	106801314	2	-2.2009
14	106810847	107287445	90	-0.5426
15	20102540	43637910	3234	-0.5722
15	43641594	43656676	5	0.5468
15	43660907	44717004	225	-0.5137
15	44723683	52463931	1357	0.4234
15	52466795	54327075	297	-0.5327
15	54331204	69996451	2914	0.4186
15	70007236	70642938	84	-0.6291
15	70654975	78800466	1526	0.4032
15	78805640	78825247	9	0.8158
15	78829755	102480828	3810	0.3848
16	93627	6287025	1106	-0.0836
16	6294130	6525833	47	-0.7891
16	6531980	6972247	84	-1.4217
16	6977920	7008323	12	-0.823
16	7013475	35147448	3515	-0.0635
16	46500740	78999780	4540	-0.052
16	79005549	79194873	39	-0.6883
16	79198987	90163069	1720	-0.0763
17	47545	22218385	3618	-0.8033
17	25375448	27021389	271	0.3838
17	27031139	27031139	5	-0.1146
17	27034701	81108002	8818	0.3955
18	14315	15072734	2206	-0.6717
18	18529850	78009972	7642	-0.6009
19	259394	24366014	4473	-0.0996
19	27853206	42139069	2154	-0.0902
19	42144339	42393826	49	0.3828
19	42398435	59095358	3237	-0.1045
20	67777	14017180	2098	0.3658
20	14026780	14762982	132	1.3054
20	14766775	15268001	97	0.5329
20	15272155	17383933	324	1.3976
20	17390283	20233006	477	0.4113
20	20238942	26196660	769	1.4174
20	26199111	26225122	8	0.5101
20	29633751	47246371	2923	1.3925
20	47253611	47256995	6	0.5095
20	47262025	62908614	2432	1.3707
21	9832447	11145541	36	-0.004
21	14640391	48098543	5764	-0.043
22	16486085	51224201	7069	-0.2208
23	61090	58482330	8593	0.155
23	61931688	62405220	29	0.1482
23	62473919	62501708	3	-0.9692
23	62518745	71395012	1175	0.1645
23	71400687	71400687	5	0.7319
23	71404536	95845433	2070	0.166
23	95851575	95910021	8	-0.4948
23	95920737	134581921	5515	0.1829
23	134590528	134590528	5	-0.4244
23	134604639	155257081	2735	0.1536
24	2668327	10035499	63	-0.5242
24	13213475	59031420	125	-0.3987

## Sheet: CGH HCT116
chrom	loc.start	loc.end	num.mark	seg.mean
1	564423	94458151	14987	0.05
1	94461709	94461709	5	0.8707
1	94465554	121350870	3687	-0.0704
1	142617942	145291710	49	-0.5456
1	145382361	154241767	1182	0.082
1	154244968	154244968	5	1.0372
1	154248044	192920498	6198	-0.0226
1	192938876	193211857	63	0.6215
1	193216006	245634337	7973	-0.03
1	245642872	245647383	2	-1.7433
1	245653515	249218732	640	-0.0916
2	17018	20381940	2485	-0.0716
2	20386411	20426369	14	0.4756
2	20433323	61475741	6601	-0.0235
2	61480536	61556055	15	0.8838
2	61559800	85962377	3466	-0.0296
2	85965310	85965310	5	1.1325
2	85971618	89312530	367	0.0186
2	89429842	91906583	53	-0.863
2	95420437	96432288	114	0.0637
2	96604288	96610886	2	-1.3594
2	96739307	119913801	2871	-0.0259
2	119916809	119996665	15	0.66
2	120003949	132649660	1371	-0.0336
2	132661347	133019185	5	-0.9736
2	133023455	139143359	960	-0.0842
2	139162713	139517752	64	0.6753
2	139521050	141691773	250	-0.1921
2	141698089	142198204	94	-1.0386
2	142206430	205428353	8741	-0.0756
2	205434435	205794523	71	-0.9041
2	205799726	243041304	5742	-0.0081
3	62074	48600889	7148	-0.028
3	48603038	48621199	5	0.9536
3	48625539	50932143	484	0.1826
3	50954408	51003150	9	0.9432
3	51004313	60217904	1598	0.0424
3	60222677	60382705	30	-1.3403
3	60387542	60585245	40	-0.1714
3	60591758	60817491	45	-1.2555
3	60825435	90309007	3721	-0.1562
3	93538466	98120422	553	-0.1772
3	98146717	98600390	70	0.744
3	98606051	111608822	1558	-0.0931
3	111611866	111768463	32	1.0023
3	111772093	129477983	2996	-0.0029
3	129481200	129499389	5	-0.6746
3	129504593	129700669	39	0.0035
3	129703751	129703751	5	0.6903
3	129707648	172528511	5929	-0.0531
3	172538343	172538343	5	0.7438
3	172545534	188908593	2401	-0.0408
3	188915317	189259462	36	0.8207
3	189281538	197845194	1418	-0.0207
4	45881	68158	5	-1.9258
4	71551	19569911	2642	0.0285
4	19588015	19814909	20	-1.3705
4	19828087	49083230	3489	-0.0894
4	52689100	91310603	5106	-0.0832
4	91318557	91611975	54	-0.855
4	91618802	91713366	19	-0.1932
4	91721678	92023088	42	0.6647
4	92029630	92054000	4	-0.1601
4	92061827	92127460	8	0.6419
4	92135875	93561670	156	-0.1665
4	93565166	93590391	5	-1.1745
4	93599586	167282121	9136	-0.1129
4	167304814	167406568	9	0.6416
4	167418080	184312156	2012	-0.1232
4	184318459	185549935	211	-1.0336
4	185553530	185568548	8	-0.2005
4	185572486	185677437	22	-0.9155
4	185681360	190519768	716	-0.0566
4	190530859	190678648	21	-1.0881
4	190687569	190916618	23	-0.1619
5	26141	39765907	4836	-0.104
5	39795047	39859572	4	-0.951
5	39882695	46115026	770	-0.1091
5	49559919	99378789	6299	-0.0644
5	99387339	99390425	2	1.3056
5	99419596	115205537	1831	-0.1253
5	115210958	115425240	39	0.9741
5	115433804	168724413	7433	-0.0285
5	168729606	168749359	7	-0.7099
5	168755924	180712203	1828	0.0443
6	154129	1782374	267	-0.0768
6	1787298	2265220	92	-1.2217
6	2276302	20375022	2639	-0.0223
6	20382685	20623358	48	0.6841
6	20627336	26666602	918	-0.0495
6	26685435	26703036	4	-0.9654
6	26745190	35754523	1664	0.0742
6	35758266	35765356	2	-1.4206
6	35774469	58713014	3581	-0.0121
6	61971891	75934093	1831	-0.1346
6	75940677	75940677	5	-0.6938
6	75945085	78959181	332	-0.0775
6	78979171	79023268	4	1.2261
6	79045258	159064872	10932	-0.0698
6	159071014	159091325	5	-0.9723
6	159096495	159224274	30	0.8311
6	159230291	159277220	10	0.086
6	159282221	159348912	11	1.141
6	159354144	170911180	1751	-0.0954
7	44943	18168303	2633	-0.044
7	18170052	18206330	10	-1.3414
7	18219533	38315239	3124	-0.0404
7	38320011	38329692	3	0.982
7	38332988	57621359	2371	-0.057
7	62452970	100333267	5182	-0.042
7	100337054	100341654	2	-1.2696
7	100345922	110178879	1829	-0.006
7	110183287	110187165	2	1.1015
7	110193417	110264095	13	-0.0465
7	110271912	110337446	14	0.4725
7	110340772	133768750	4520	-0.0614
7	133776455	133832997	11	-1.3464
7	133838730	143951930	1859	-0.006
7	143952375	143953416	2	1.0952
7	144074491	150642117	1251	-0.0809
7	150646965	150659771	8	0.6819
7	150665751	152093656	280	0.0838
7	152101332	152112211	3	-1.1106
7	152116971	159118506	1120	-0.0108
8	161471	39226326	5546	-0.0446
8	39234991	39386098	28	0.8628
8	39392474	43527905	590	0.0014
8	46939153	67380567	2491	-0.1168
8	67386078	114000868	6134	0.6667
8	114006906	114006906	5	-0.2051
8	114012484	146294041	4350	0.7283
9	204192	11610240	1738	-0.1162
9	11632687	11659295	4	-0.9506
9	11684648	47212366	3696	-0.0493
9	66505288	68437351	8	-0.9108
9	68453025	141025861	10796	0.0165
10	136360	15150786	2310	-0.0365
10	15156290	15239064	15	0.919
10	15242683	39076531	3499	-0.0438
10	42651598	45816803	379	0.0168
10	45821747	45831891	3	-0.9755
10	45846774	64362339	2099	-0.1259
10	64370429	64380387	3	0.7205
10	64384782	100035958	5519	0.0117
10	100050352	127573287	4239	0.8074
10	127576582	127601626	6	-0.8848
10	127608434	131359404	505	0.7096
10	131365913	135434118	641	-0.9844
11	200214	10360202	1857	0.0557
11	10374638	10483560	15	0.746
11	10494002	18949928	1361	-0.0015
11	18956010	18990296	5	0.8921
11	19009870	35368065	2215	-0.0891
11	35373758	35387324	5	-1.5029
11	35394033	51511401	1771	-0.0352
11	55028486	84033300	4751	0.0831
11	84042034	84136661	19	-1.1776
11	84140913	118531936	4841	-0.0759
11	118538213	118569055	6	0.7774
11	118576088	125069339	1069	0.0609
11	125075678	125079481	2	-1.7511
11	125085891	134945105	1519	-0.0841
12	87495	34756149	5278	-0.0324
12	37958139	54793129	2631	0.0207
12	54797055	54797055	5	1.2658
12	54802853	66240147	1728	0.0132
12	66247287	66911132	124	0.8828
12	66921801	76121360	1233	-0.0457
12	76129434	76711640	68	-1.0304
12	76719820	130214048	7654	0.001
12	130219502	130270458	18	-0.5534
12	130275439	133779016	605	0.0197
13	19296543	114290671	13490	-0.0925
13	114292989	114295822	6	-0.6967
13	114303364	115107185	109	-0.0174
14	19376761	20427182	36	-0.7934
14	20465946	21341879	198	0.0177
14	21354330	21412011	12	0.8539
14	21420288	70009064	7312	-0.0193
14	70018436	70022457	2	1.3135
14	70028815	107287445	6115	0.026
15	20102540	20616626	19	-0.2947
15	20624421	22107446	33	-0.8476
15	22304595	67301725	7486	-0.0044
15	67305495	67481322	40	0.7843
15	67486918	94329712	4629	0.052
15	94334588	94368588	9	0.5271
15	94378244	102480828	1245	-0.0679
16	93627	728210	126	-0.8852
16	731637	6213402	965	0.1725
16	6219040	7004321	153	-1.7694
16	7008323	7017521	7	-0.0181
16	7026343	7139742	25	-1.044
16	7144128	21336883	1889	0.0676
16	21350517	21739826	37	-0.8006
16	21951378	35147448	1562	0.0721
16	46500740	53363640	913	-0.026
16	53373762	53376768	2	-1.2776
16	53388856	55794892	300	-0.03
16	55799202	55822332	6	0.9288
16	55832510	55853298	5	-0.7507
16	55867232	74360627	2608	0.0338
16	74372284	74407281	5	-0.7428
16	74465076	78577628	624	-0.0576
16	78581370	78738171	28	-1.331
16	78744858	78933527	37	-0.0341
16	78939147	90163069	1771	0.8562
17	47545	22218385	3618	0.085
17	25375448	34433775	1617	0.0615
17	34437474	34817421	8	1.1468
17	34823124	43438946	1556	0.1727
17	43452083	43518295	11	1.3374
17	43651876	43675407	5	0.0682
17	43706885	60782963	2572	0.8426
17	60789440	60789440	5	1.5928
17	60796304	62779637	352	0.8846
17	62784268	62948655	12	0.2284
17	62955244	81108002	2956	0.8803
18	14315	266182	29	-1.0366
18	270153	15072734	2177	-0.0582
18	18529850	54687949	4736	-0.0764
18	54690899	54937049	28	0.8399
18	54941950	78009972	2878	-0.0908
19	259394	15431643	2975	0.2096
19	15435497	15465393	7	-0.6212
19	15469479	20738611	1015	0.2055
19	20760438	21001148	44	-0.8727
19	21007674	24366014	432	-0.109
19	27853206	59095358	5440	0.1107
20	67777	3830545	688	0.068
20	3835296	3882750	11	0.7906
20	3885919	14940764	1566	-0.0738
20	14944154	14972194	6	-1.3677
20	14975902	26194399	1625	-0.07
20	26196660	26225122	9	-0.8343
20	29633751	29652451	4	-0.9075
20	29833608	30037873	36	0.1043
20	30045298	30049834	2	-0.961
20	30054888	33576494	683	0.1401
20	33578209	33582998	7	0.7915
20	33585913	48251587	2376	0.0827
20	48257093	48372025	24	0.7913
20	48384930	62908614	2229	0.0412
21	9832447	11145541	36	-0.7464
21	14640391	14960388	22	-0.2924
21	14968457	15070237	5	-0.9113
21	15125364	48098543	5737	-0.0411
22	16486085	39353569	4580	0.1265
22	39359111	39385438	6	-0.6694
22	39388722	46687014	1611	0.1492
22	46689865	46689865	5	1.0371
22	46693404	51224201	867	0.0735
23	61090	2665546	762	-0.7634
23	2669190	2680372	5	-1.7996
23	2682497	2695377	8	-0.8733
23	2698112	29379325	3876	0.1566
23	29385544	29517384	30	1.1067
23	29526154	29538932	4	0.1927
23	29543619	29963322	91	-0.517
23	29967096	45539305	2166	0.1377
23	45562253	45591757	7	1.2368
23	45592883	58482330	1644	0.2062
23	61931688	148597852	10425	0.1413
23	148606498	148613723	3	-0.6346
23	148620577	149105820	47	0.1934
23	149109080	149158159	10	1.2698
23	149162799	154929283	967	0.2158
23	154933495	155257081	93	-0.8219
24	2668327	10035499	63	-0.8444
24	13213475	59031420	125	-0.7586

## Sheet: CGH DKO
chrom	loc.start	loc.end	num.mark	seg.mean
1	564423	20123740	3076	0.1661
1	20130968	20130968	5	-0.5074
1	20135346	33221825	2201	0.2175
1	33227973	33238820	3	1.4308
1	33243431	49837367	2864	0.1386
1	49840229	49903352	14	-0.7915
1	49907776	94690347	6874	-0.0648
1	94697126	94809519	19	0.83
1	94827538	121350870	3623	-0.0613
1	142617942	161366841	2608	0.1407
1	161373079	161385820	4	0.9348
1	161388869	172304237	1836	-0.047
1	172308321	172313845	2	-1.0162
1	172319801	174155766	287	0.0319
1	174164010	174185692	4	-1.1963
1	174188338	174276059	17	-0.0545
1	174289041	174411606	24	-0.8186
1	174417587	192920498	2652	-0.0776
1	192938876	193168353	55	0.8097
1	193175412	193216006	9	0.0412
1	193220241	193260528	7	-1.0669
1	193269451	218458691	3758	-0.0222
1	218462707	218548462	17	-0.9848
1	218556198	245634337	4190	-0.0397
1	245642872	245647383	2	-1.7429
1	245653515	248093828	477	-0.1243
1	248098277	248251107	29	-0.9728
1	248256804	249218732	134	-0.1158
2	17018	42799763	6355	-0.0535
2	42805499	42858315	10	0.9222
2	42862368	61475741	2735	-0.0463
2	61480536	61556055	15	0.9481
2	61559800	85962377	3466	0
2	85965310	85965310	5	0.9
2	85971618	89312530	367	0.0616
2	89429842	91906583	53	-0.8194
2	95420437	132649660	4373	-0.0283
2	132661347	133036757	9	-0.7981
2	133039037	138440410	894	-0.094
2	138447311	138558272	8	-1.3845
2	138581221	139143359	54	-0.1628
2	139162713	139517752	64	0.7552
2	139521050	141691773	250	-0.2457
2	141698089	142154937	86	-1.1662
2	142158469	142238789	16	-0.1539
2	142245006	142307683	14	0.4332
2	142314031	186590112	6203	-0.0975
2	186596689	186681940	16	-1.2814
2	186689817	205428353	2500	-0.0454
2	205434435	205794523	71	-0.9551
2	205799726	237235755	4812	-0.036
2	237241886	237663174	63	-0.996
2	237684414	239606935	298	0.1102
2	239614328	241857125	380	-1.014
2	241864498	242374371	95	0.1353
2	242380539	242522127	27	-1.0327
2	242710412	243041304	67	0.086
3	62074	49822962	7416	-0.0149
3	49830974	49851702	5	1.2513
3	49863320	50932143	216	0.2997
3	50954408	51003150	9	0.9942
3	51004313	52651421	323	0.2238
3	52657566	52741960	18	-0.8586
3	52746192	60167603	1248	0.0179
3	60173717	60426340	48	-1.4598
3	60431641	60585245	31	-0.2757
3	60591758	60817491	45	-1.3459
3	60825435	71229391	1520	-0.179
3	71233517	71357409	28	-1.1238
3	71363329	71712410	75	-0.2497
3	71718710	71808107	19	-1.124
3	71813086	90309007	2079	-0.2356
3	93538466	98120422	553	-0.2218
3	98146717	98600390	70	0.8199
3	98606051	111603766	1557	-0.1201
3	111608822	111768463	33	0.8906
3	111772093	116795511	862	-0.0727
3	116814085	117563804	51	-1.326
3	117583392	127186575	1628	0.0438
3	127190653	127307733	23	0.9953
3	127311923	172528511	6410	-0.0519
3	172538343	172538343	5	0.5138
3	172545534	188908593	2401	-0.0756
3	188915317	189281538	37	0.8058
3	189290620	197845194	1417	-0.0166
4	45881	68158	5	-2.6155
4	71551	1530899	236	0.098
4	1537702	1554674	3	1.3032
4	1563817	19544366	2402	0.0124
4	19569911	19814909	21	-1.3263
4	19828087	21158948	210	-0.1512
4	21169189	21180095	3	0.5675
4	21183363	30766190	1011	-0.1351
4	30774086	31095801	68	0.5933
4	31103306	48656066	2121	-0.0729
4	48659465	48712055	11	0.8288
4	48721169	49083230	65	0.0302
4	52689100	91310603	5106	-0.1101
4	91318557	91713366	73	-0.9216
4	91721678	91769296	12	-0.2305
4	91775132	91940837	21	0.6713
4	91952025	92054000	13	-0.2299
4	92061827	92127460	8	0.687
4	92135875	93561670	156	-0.2285
4	93565166	93581339	4	-1.4605
4	93590391	93834536	44	-0.7094
4	93836415	156754340	7815	-0.1381
4	156757818	156757818	5	-0.8537
4	156760749	167282121	1273	-0.1968
4	167304814	167418080	10	0.591
4	167427313	184312156	2011	-0.1921
4	184318459	185549935	211	-1.07
4	185553530	185568548	8	-0.2398
4	185572486	185677437	22	-1.0117
4	185681360	190469277	711	-0.1162
4	190480806	190678648	26	-0.8632
4	190687569	190916618	23	-0.3223
5	26141	24128435	3022	-0.2154
5	24134211	25801683	152	-1.2887
5	25822294	41686657	1894	-0.1043
5	41699425	41802285	22	0.5089
5	41805960	46115026	520	-0.1254
5	49559919	57964399	1033	-0.0809
5	57971128	57975606	2	-0.9975
5	57980911	77919470	2593	-0.0576
5	77924038	77977370	10	0.8023
5	77991661	79837574	310	0.0823
5	79844192	79844192	5	0.5708
5	79851377	94043196	1704	-0.0977
5	94046155	94501376	88	0.7198
5	94508179	99378789	554	-0.0821
5	99387339	99390425	2	1.2094
5	99419596	115205537	1831	-0.1483
5	115210958	115436412	41	0.9186
5	115451175	115600159	29	-0.0787
5	115607518	115696093	12	0.6605
5	115704477	142026467	3645	0.0064
5	142031842	142044755	4	-0.7256
5	142047794	150201205	1317	0.0084
5	150204996	150229595	5	-0.5543
5	150235345	152614239	332	-0.0248
5	152639568	152873469	17	0.5172
5	152878000	168724413	2070	-0.1528
5	168729606	168763111	9	-0.6251
5	168778607	180712203	1826	0.0103
6	154129	1782374	267	-0.189
6	1787298	2265220	92	-1.3565
6	2276302	20375022	2639	-0.0494
6	20382685	20623358	48	0.8568
6	20627336	35754523	2586	0.061
6	35758266	35765356	2	-1.362
6	35774469	37798373	388	0.1855
6	37805178	37830523	7	1.1196
6	37835423	58713014	3186	-0.0276
6	61971891	77000762	2005	-0.1648
6	77022973	77034760	2	1.0399
6	77070232	78959181	161	-0.1897
6	78979171	79023268	4	1.2341
6	79045258	159071014	10933	-0.0834
6	159074070	159099915	6	-0.6915
6	159104730	159224274	28	0.9995
6	159230291	159277220	10	0.2038
6	159282221	159348912	11	1.1498
6	159354144	162328279	489	-0.0425
6	162337208	162707602	75	-1.2367
6	162711856	170911180	1187	-0.1959
7	44943	1973434	272	0.1957
7	1976965	1981049	2	2.1169
7	1987001	18168303	2359	-0.0821
7	18170052	18206330	10	-1.3763
7	18219533	38311202	3123	-0.0586
7	38315239	38364381	11	0.5622
7	38369438	39909913	271	-0.0251
7	39913545	40074499	30	1.5719
7	40081610	57621359	2063	-0.0749
7	62452970	65972974	347	0.0307
7	65990206	66023954	5	0.8606
7	66028892	72245324	851	-0.1113
7	72249139	72274003	3	-0.6605
7	72274128	76200156	448	0.3059
7	76206725	83409903	1036	-0.1856
7	83434113	83606413	14	0.6283
7	83611333	100333267	2478	-0.043
7	100337054	100341654	2	-1.2891
7	100345922	110178879	1829	0.0125
7	110183287	110187165	2	0.8462
7	110193417	110316716	22	-0.1417
7	110320577	110337446	5	0.8006
7	110340772	120826224	2020	-0.1606
7	120831207	120942737	22	-1.1119
7	120947809	130523647	1813	-0.0679
7	130529347	130580658	21	1.0696
7	130582594	133055591	504	0.0112
7	133059745	133064324	2	-1.1796
7	133070209	133768750	138	-0.1166
7	133776455	133832997	11	-1.4059
7	133838730	133880993	11	-0.0328
7	133884142	134287384	81	0.8066
7	134292288	143951930	1767	-0.0047
7	143952375	143953416	2	1.2547
7	144074491	152093656	1539	-0.0846
7	152101332	152112211	3	-1.0541
7	152116971	159118506	1120	-0.0817
8	161471	37794364	5292	-0.0684
8	37809582	37832540	9	0.5649
8	37838563	39234991	246	0.1122
8	39237437	39386098	27	0.7614
8	39392474	43527905	590	-0.0282
8	46939153	114000868	8625	0.1647
8	114006906	114006906	5	-0.5951
8	114012484	116629891	248	0.0049
8	116635803	119272352	339	0.6057
8	119279511	119390639	25	-0.1551
8	119394683	126194307	987	0.7037
8	126197234	126389679	40	1.4313
8	126397315	128151794	186	0.73
8	128166175	128358500	25	1.9637
8	128365746	128850600	56	0.8571
8	128860255	129005385	42	0.0339
8	129008841	137190019	1062	0.6051
8	137214986	137251512	3	1.2953
8	137268221	139004477	127	0.3979
8	139018164	139039337	4	-0.325
8	139045821	142202434	521	0.6494
8	142205750	142215120	6	0.1676
8	142218253	146294041	679	0.8521
9	204192	11610240	1738	-0.1647
9	11632687	11659295	4	-1.0595
9	11684648	12629753	80	-0.3591
9	12638879	12680187	5	0.5977
9	12686559	47212366	3611	-0.0653
9	66505288	68437351	8	-0.7882
9	68453025	79371184	1333	-0.0467
9	79377720	79381398	2	1.0544
9	79384968	132248267	7900	0.0018
9	132254121	132258913	2	1.7403
9	132263706	138658788	1111	0.1763
9	138662785	138684746	5	1.3644
9	138691532	139397148	123	0.2422
9	139400820	139422457	6	1.76
9	139428825	139638445	48	0.3312
9	139641470	139651254	3	1.516
9	139659614	141025861	263	0.2061
10	136360	15150786	2310	-0.0498
10	15156290	15239064	15	0.9639
10	15242683	39076531	3499	-0.0524
10	42651598	64362339	2481	-0.1298
10	64370429	64380387	3	0.7712
10	64384782	100035958	5519	0.023
10	100050352	121607180	3327	0.8521
10	121612490	121668606	11	1.5738
10	121677354	127573287	901	0.808
10	127576582	127601626	6	-0.8724
10	127608434	131359404	505	0.6458
10	131365913	132353316	163	-1.1096
10	132360481	132640782	33	-1.6064
10	132645194	135434118	445	-0.9273
11	200214	1880791	324	0.2407
11	1888383	1901861	3	2.4599
11	1908973	4958462	484	0.0608
11	4962434	4962434	5	-0.7819
11	4966723	10360202	1041	0.0057
11	10374638	10483560	15	0.8795
11	10494002	18949928	1361	0.0179
11	18956010	18990296	5	0.8444
11	19009870	35368065	2215	-0.1191
11	35373758	35387324	5	-1.6336
11	35394033	51511401	1771	-0.0411
11	55028486	57368919	370	-0.163
11	57373912	57414068	15	0.9981
11	57417953	84055672	4369	0.1314
11	84059470	84136661	16	-1.2384
11	84140913	84360259	50	-0.1772
11	84367237	84610530	46	-1.2937
11	84616969	118531936	4745	0.0252
11	118538213	118569055	6	1.3002
11	118576088	125069339	1069	0.5605
11	125075678	125079481	2	-1.7984
11	125085891	130920050	822	0.4013
11	130925959	133001647	384	-0.323
11	133005851	133136694	28	0.6646
11	133139631	134280276	199	1.5111
11	134288463	134945105	86	2.1573
12	87495	6905217	1211	0.0348
12	6909881	7109758	56	1.0983
12	7114196	19427434	1822	-0.0207
12	19431186	19505453	13	0.6231
12	19511318	34756149	2176	-0.0803
12	37958139	54793129	2631	0.0557
12	54797055	54797055	5	1.1362
12	54802853	56779631	367	0.144
12	56783466	56889827	19	0.9054
12	56898638	66247287	1343	0.0116
12	66251298	66332204	19	0.88
12	66335332	66417884	19	1.4748
12	66422335	66911132	85	0.8542
12	66921801	76121360	1233	-0.0594
12	76129434	76711640	68	-1.048
12	76719820	100429666	3058	-0.1323
12	100433506	100464398	7	0.8266
12	100472356	117799465	2687	0.0494
12	117806098	117833518	5	-0.4908
12	117845698	118590356	142	0.0642
12	118593467	118791807	40	0.8609
12	118798635	133779016	2338	0.0492
13	19296543	43718403	4014	-0.034
13	43723301	43731857	6	-1.0838
13	43744551	47842592	728	0.0069
13	47854343	70510295	2631	-1.1276
13	70514329	80933414	1416	-0.177
13	80936579	85263724	353	-0.7548
13	85274792	113738465	4217	-0.1547
13	113743884	113810040	12	0.9835
13	113813184	115107185	228	0.0393
14	19376761	19728640	5	0.0309
14	19794560	20420789	30	-0.6784
14	20427182	21341879	199	0.1043
14	21354330	21412011	12	0.909
14	21420288	58906555	5327	0.2969
14	58910765	58982427	18	1.3666
14	58985451	67024821	1349	0.4097
14	67032802	67119358	16	-0.9429
14	67136972	67306384	33	0.3286
14	67310354	67449429	26	-0.5055
14	67453056	76156391	1732	0.5193
14	76160523	76451026	58	-0.5202
14	76454129	105964735	4690	0.3647
14	105970011	105970011	5	3.3724
14	105974325	107287445	175	0.1651
15	20102540	20624421	20	-0.1666
15	20849109	22107446	32	-0.726
15	22304595	66446547	7325	0.0082
15	66451775	66651997	45	0.9504
15	66655117	67296452	115	0.2278
15	67301725	67481322	41	0.8582
15	67486918	67529105	10	-0.073
15	67532927	67643320	22	-1.0528
15	67649726	94136330	4578	0.0585
15	94150633	94603168	61	0.6165
15	94608068	102480828	1212	-0.1079
16	93627	207587	24	-1.2488
16	212284	227737	4	-0.2318
16	231777	316049	17	-1.2831
16	319559	724132	80	-0.5928
16	728210	6213402	966	0.2363
16	6219040	6932304	138	-1.8893
16	6935977	7004321	15	-1.1152
16	7008323	7017521	7	-0.0509
16	7026343	7139742	25	-1.1461
16	7144128	21350517	1890	0.0674
16	21475038	21739826	36	-0.7846
16	21951378	35147448	1562	0.0986
16	46500740	53363640	913	-0.0576
16	53373762	53376768	2	-1.3563
16	53388856	55794892	300	-0.1109
16	55799202	55822332	6	0.6702
16	55832510	55853298	5	-0.7011
16	55867232	78255683	3176	0.0403
16	78259370	78572515	60	-0.834
16	78577628	78738171	29	-1.4609
16	78744858	78838804	17	-0.2063
16	78845072	78933527	20	-1.0911
16	78939147	78970663	6	-0.102
16	78975006	90163069	1765	0.8621
17	47545	9170930	1723	0.2833
17	9174035	9248094	15	0.8734
17	9253763	18928346	1475	0.1347
17	19143172	19186400	10	1.4093
17	19190089	22218385	395	0.1549
17	25375448	34444782	1619	0.0955
17	34450404	34475454	5	1.4531
17	34817421	43438946	1557	0.2609
17	43452083	43651876	12	1.2654
17	43655746	43675407	4	0.1324
17	43706885	62779637	2929	0.947
17	62784268	62948655	12	0.2631
17	62955244	70545851	1082	0.8299
17	70551585	70714128	28	1.7394
17	70720435	81108002	1846	1.0116
18	14315	266182	29	-0.5533
18	270153	15072734	2177	0.3997
18	18529850	21666025	514	0.0988
18	21669502	27299780	671	-0.4775
18	27311902	27580125	16	0.2802
18	27600861	54687949	3535	-0.2403
18	54690899	54925537	27	0.7772
18	54937049	78009972	2879	-0.1616
19	259394	15431643	2975	0.2575
19	15435497	15456383	6	-0.7258
19	15465393	20738611	1016	0.2776
19	20760438	21001148	44	-0.9043
19	21007674	23433411	320	-0.1601
19	23436540	23455185	4	-0.9081
19	23462873	24366014	108	-0.1871
19	27853206	55088590	4668	0.1679
19	55098934	55228000	24	-1.1329
19	55380003	59095358	748	0.0273
20	67777	3830545	688	0.0927
20	3835296	3882750	11	1.0243
20	3885919	14940764	1566	-0.0727
20	14944154	14972194	6	-1.5232
20	14975902	15112283	27	-0.1903
20	15120106	15309307	37	-1.1832
20	15317251	15430032	22	-0.3605
20	15434134	15618414	37	-1.235
20	15621949	26199111	1504	-0.0764
20	26200763	26225122	7	-0.8821
20	29633751	29652451	4	-0.7419
20	29833608	30037873	36	0.1473
20	30045298	30049834	2	-1.0052
20	30054888	31364833	267	0.2363
20	31369339	31390123	5	-1.2741
20	31396101	48251587	2794	0.1333
20	48257093	48372025	24	0.9371
20	48384930	62908614	2229	0.0064
21	9832447	11145541	36	-0.8732
21	14640391	48098543	5764	-0.0674
22	16486085	24337607	1335	0.1898
22	24356689	24395304	3	-0.7545
22	24405240	32300793	1792	0.1402
22	32305172	32346251	14	0.5995
22	32350033	39353569	1436	0.1422
22	39359111	39385438	6	-0.6556
22	39388722	51224201	2483	0.1596
23	61090	230801	38	-0.9231
23	283985	330756	21	-0.2755
23	332595	2014831	491	-1.0353
23	2017308	2415477	129	-1.3123
23	2415775	2665546	83	-1.0215
23	2669190	2695373	12	-1.9382
23	2695377	7130123	560	-0.04
23	7134285	7213825	15	-0.5996
23	7218799	10439579	469	0.0247
23	10442640	10549812	21	-0.5807
23	10559488	10579579	6	0.1178
23	10586985	10629841	10	1.139
23	10633298	29538932	2830	0.0809
23	29543619	29963322	91	-0.6007
23	29967096	45539305	2166	0.0463
23	45562253	45591757	7	1.2455
23	45592883	58482330	1644	0.152
23	61931688	69448512	881	0.0737
23	69451972	69516804	15	0.3327
23	69521640	96411794	2497	0.0293
23	96417125	96496103	18	-0.5583
23	96499247	96507137	3	-1.2696
23	96515574	96727899	45	-0.476
23	96733126	101050436	512	0.0674
23	101055533	101059793	2	1.1434
23	101078989	148597852	6452	0.0534
23	148606498	148613723	3	-0.6274
23	148620577	149109080	48	0.1548
23	149112255	149158159	9	1.3017
23	149162799	154929283	967	0.1208
23	154933495	155257081	93	-0.9885
24	2668327	10035499	63	-1.1681
24	13213475	59031420	125	-0.983

## Sheet: ncNSUMA 369T
chrom	loc.start	loc.end	num.mark	seg.mean
1	0	148700000	1488	-0.218
1	148800000	249200000	1005	0.2234
2	0	243100000	2432	-0.0227
3	0	198000000	1981	-0.3487
4	0	191100000	1912	-0.2931
5	0	25600000	257	0.283
5	25700000	180900000	1553	-0.1106
6	0	84800000	849	0.1516
6	84900000	171100000	863	-0.2925
7	0	61000000	611	0.2675
7	61100000	61300000	3	-0.7125
7	61400000	74600000	133	0.2217
7	74700000	74800000	2	-0.903
7	74900000	159100000	843	0.2856
8	0	41000000	411	-0.3938
8	41100000	52200000	112	-0.0245
8	52300000	126700000	745	0.4715
8	126800000	129000000	23	1.6015
8	129100000	146300000	173	0.1137
9	0	141200000	1413	-0.0084
10	0	48600000	487	-0.0268
10	48700000	49100000	5	-0.9184
10	49200000	135500000	864	-0.0991
11	0	135000000	1351	-0.1494
12	0	133800000	1339	-0.0469
13	0	18900000	190	0
13	19000000	115100000	962	0.8441
14	0	107300000	1074	-0.1782
15	0	102300000	1024	-0.2155
15	102400000	102500000	2	0.3846
16	0	90300000	904	0.0303
17	0	22100000	222	-0.3697
17	22200000	81100000	590	-0.0139
18	0	78000000	781	-0.3061
19	0	59100000	592	0.0423
20	0	63000000	631	0.3082
21	0	9300000	94	0
21	9400000	10200000	9	-0.4703
21	10300000	46600000	364	-0.055
21	46700000	46800000	2	0.6535
21	46900000	48100000	13	-0.011
22	0	20000000	201	-0.0544
22	20100000	20400000	4	0.59
22	20500000	51300000	309	-0.2547
23	0	155200000	1553	0.2356
24	0	59300000	594	-0.0715

## Sheet: ncNSUMA 544T
chrom	loc.start	loc.end	num.mark	seg.mean
1	0	13300000	134	0.2346
1	13400000	13700000	4	1.0856
1	13800000	149100000	1354	0.0741
1	149200000	149500000	4	1.1787
1	149600000	249200000	997	0.0953
2	0	49400000	495	0.0868
2	49500000	51700000	23	-0.6795
2	51800000	220200000	1685	0.0453
2	220300000	223000000	28	-0.4616
2	223100000	240600000	176	0.1544
2	240700000	242800000	22	-0.3478
2	242900000	243100000	3	0.2288
3	0	198000000	1981	0.0482
4	0	134300000	1344	0.0136
4	134400000	135000000	7	-0.6389
4	135100000	191100000	561	0.0052
5	0	168300000	1684	-0.2312
5	168400000	180600000	123	0.3898
5	180700000	180900000	3	-0.3372
6	0	28400000	285	-0.173
6	28500000	30300000	19	0.437
6	30400000	32200000	19	0.8243
6	32300000	33400000	12	0.4843
6	33500000	92700000	593	-0.1983
6	92800000	113200000	205	-0.9695
6	113300000	171100000	579	-0.2201
7	0	111600000	1117	0.2708
7	111700000	127100000	155	-0.333
7	127200000	159100000	320	0.2847
8	0	42300000	424	-0.4942
8	42400000	46700000	44	0.0962
8	46800000	125200000	785	0.4896
8	125300000	126200000	10	-0.0241
8	126300000	127500000	13	0.5796
8	127600000	130700000	32	1.1228
8	130800000	146300000	156	0.3958
9	0	141200000	1413	0.0769
10	0	31600000	317	-0.502
10	31700000	135500000	1039	-0.0409
11	0	1100000	12	-0.1959
11	1200000	2800000	17	0.7235
11	2900000	5600000	28	0.0009
11	5700000	12400000	68	0.5364
11	12500000	89400000	770	0.0817
11	89500000	89600000	2	-0.8709
11	89700000	135000000	454	0.0719
12	0	133800000	1339	0.0626
13	0	115100000	1152	0.2821
14	0	20000000	201	-0.0108
14	20100000	33300000	133	-0.5629
14	33400000	33600000	3	0.3392
14	33700000	34600000	10	-0.613
14	34700000	107300000	727	0.0836
15	0	28600000	287	0.0186
15	28700000	28800000	2	1.5084
15	28900000	102500000	737	0.1249
16	0	90300000	904	-0.2019
17	0	20200000	203	-0.3941
17	20300000	20400000	2	1.1058
17	20500000	78900000	585	0.0846
17	79000000	80800000	19	0.6662
17	80900000	81100000	3	-0.1449
18	0	11600000	117	-0.4993
18	11700000	14100000	25	0.6648
18	14200000	23500000	94	0.134
18	23600000	78000000	545	-0.5175
19	0	59100000	592	0.0313
20	0	63000000	631	0.1648
21	0	48100000	482	0.0525
22	0	51300000	514	0.0838
23	0	2500000	26	0.2941
23	2600000	58400000	559	-0.5114
23	58500000	61800000	34	0.0058
23	61900000	155200000	934	-0.5425
24	0	59300000	594	0.0765

## Sheet: ncNSUMA 557T
chrom	loc.start	loc.end	num.mark	seg.mean
1	0	120700000	1208	-0.0653
1	120800000	120900000	2	-1.0737
1	121000000	249200000	1283	-0.0663
2	0	243100000	2432	-0.112
3	0	198000000	1981	-0.1267
4	0	191100000	1912	-0.1561
5	0	68800000	689	-0.0005
5	68900000	69000000	2	-1.12
5	69100000	180900000	1119	0.0074
6	0	28400000	285	0.2327
6	28500000	31400000	30	0.7819
6	31500000	32100000	7	1.3174
6	32200000	33400000	13	0.6681
6	33500000	171100000	1377	0.1709
7	0	159100000	1592	-0.0843
8	0	7000000	71	-1.1978
8	7100000	12100000	51	-0.4434
8	12200000	31300000	192	-1.1691
8	31400000	34600000	33	-0.5701
8	34700000	39600000	50	-0.1249
8	39700000	146300000	1067	0.435
9	0	39800000	399	0.537
9	39900000	42800000	30	-0.1623
9	42900000	46300000	35	0.5868
9	46400000	70900000	246	0.0337
9	71000000	141200000	703	-0.5066
10	0	135500000	1356	-0.0834
11	0	65200000	653	-0.1071
11	65300000	66100000	9	0.4872
11	66200000	135000000	689	-0.1152
12	0	133800000	1339	-0.1009
13	0	18900000	190	0
13	19000000	115100000	962	0.9966
14	0	19300000	194	-0.0049
14	19400000	107300000	880	-0.5532
15	0	20300000	204	-0.0001
15	20400000	44600000	243	-0.4485
15	44700000	52400000	78	0.2194
15	52500000	54200000	18	-0.4983
15	54300000	102500000	483	0.2478
16	0	6400000	65	0.1301
16	6500000	6900000	5	-2.1023
16	7000000	90300000	834	-0.0227
17	0	4800000	49	-0.3392
17	4900000	7100000	23	-1.0346
17	7200000	10500000	34	-0.3087
17	10600000	18800000	83	-0.9676
17	18900000	21600000	28	-0.0341
17	21700000	22000000	4	-1.2266
17	22100000	81100000	591	0.3059
18	0	700000	8	-0.5987
18	800000	2800000	21	-1.3038
18	2900000	13700000	109	-0.519
18	13800000	18500000	48	-0.0786
18	18600000	48200000	297	-0.5938
18	48300000	50000000	18	-1.2085
18	50100000	78000000	280	-0.5908
19	0	59100000	592	0.0986
20	0	13900000	140	0.242
20	14000000	14600000	7	0.8725
20	14700000	15200000	6	0.1842
20	15300000	17300000	21	0.8159
20	17400000	20100000	28	0.2724
20	20200000	26200000	61	0.9799
20	26300000	29800000	36	0.0643
20	29900000	63000000	332	1.0406
21	0	48100000	482	-0.0897
22	0	21400000	215	-0.0309
22	21500000	21600000	2	1.6658
22	21700000	51300000	297	-0.0676
23	0	155200000	1553	0.182
24	0	2500000	26	0.0772
24	2600000	9700000	72	-0.5252
24	9800000	13500000	38	0.0277
24	13600000	20100000	66	-0.5513
24	20200000	20500000	4	0.7325
24	20600000	24400000	39	-0.4371
24	24500000	59300000	349	-0.013

## Sheet: ncNSUMA HCT116
chrom	loc.start	loc.end	num.mark	seg.mean
1	0	249200000	2493	0.0346
2	0	141500000	1416	-0.0071
2	141600000	142200000	7	-1.0078
2	142300000	205400000	632	-0.1315
2	205500000	205700000	3	-1.3068
2	205800000	243100000	374	0.0196
3	0	98000000	981	-0.0393
3	98100000	98600000	6	0.6678
3	98700000	198000000	994	-0.0535
4	0	48800000	489	-0.0518
4	48900000	49600000	8	0.7019
4	49700000	69100000	195	-0.0894
4	69200000	69800000	7	0.7083
4	69900000	91200000	214	-0.0844
4	91300000	91500000	3	-1.2504
4	91600000	184300000	928	-0.1503
4	184400000	185200000	9	-0.9648
4	185300000	191100000	59	-0.028
5	0	68800000	689	-0.0743
5	68900000	70000000	12	0.6751
5	70100000	180900000	1109	-0.0537
6	0	1700000	18	0.0104
6	1800000	2200000	5	-0.9638
6	2300000	28400000	262	0.0173
6	28500000	33400000	50	1.2175
6	33500000	171100000	1377	-0.0614
7	0	159100000	1592	0.0086
8	0	141000000	1411	0.2295
8	141100000	146300000	53	0.7767
9	0	141200000	1413	0.0268
10	0	131300000	1314	0.1466
10	131400000	135500000	42	-0.6027
11	0	135000000	1351	0.0204
12	0	66100000	662	-0.0078
12	66200000	66700000	6	0.5757
12	66800000	133800000	671	-0.0112
13	0	115100000	1152	-0.0958
14	0	107300000	1074	-0.0025
15	0	102500000	1026	0.0476
16	0	600000	7	-0.2366
16	700000	6100000	55	0.3854
16	6200000	6900000	8	-3.1906
16	7000000	78200000	713	0.0794
16	78300000	78800000	6	-0.5692
16	78900000	90100000	113	0.7526
16	90200000	90300000	2	0.1132
17	0	81100000	812	0.4056
18	0	78000000	781	-0.0764
19	0	59100000	592	0.3014
20	0	63000000	631	0.1075
21	0	48100000	482	-0.017
22	0	51300000	514	0.1689
23	0	3000000	31	0.3993
23	3100000	29400000	264	-0.3333
23	29500000	29900000	5	-2.1385
23	30000000	61500000	316	-0.2326
23	61600000	61800000	3	1.0229
23	61900000	155200000	934	-0.3231
24	0	2500000	26	0.4185
24	2600000	9800000	73	-0.7798
24	9900000	13900000	41	0.1764
24	14000000	19500000	56	-0.8559
24	19600000	20900000	14	0.4734
24	21000000	24500000	36	-0.9846
24	24600000	26400000	19	0.1594
24	26500000	27400000	10	1.0006
24	27500000	28600000	12	-0.1095
24	28700000	28800000	2	0.7052
24	28900000	59300000	305	0.0057

[truncated: 1 more sheets: ncNSUMA DKO]
