# Supplementary material for: The epigenetic landscape of Alu repeats delineates the structural and functional genomic architecture of colon cancer cells
Source: HighWire-hosted journal article supplement (doi:10.1101/gr.207522.116), 2016-12-20
Supplement: Supplemental_Data_S6.xlsx [file Supplemental_Data_S6.xlsx]

## Sheet: Description
Supplemental Data S6. Hypomethylated Alu regions detected by NSUMA
Sheet's names identify the sample(s) considered in the analysis. The chromosome segments were obtained by applying theDNAcopy R package to normalized NSUMA reads mapped to canonical Alu amplicons (see Material and Methods)
Mireia Jordà et al.
Fields	description
chrom	chromosome
loc.start	segment start position
loc.end	segment end position
num.mark	number of informative marks (NSUMA canonical ALU amplicons) per segment
seg.mean	mean of the log2((number of normalized reads in the normal tissue+1)/(number of normalized reads in the tumor tissue+1)) of all canonical amplicons within the segment
SIZE	size of segment (bp)
UCSC GB view	direct link to the segment in UCSC genome browser (go to "links" sheet to modify deafault window size)
Sample	Cut off
369T	-0.8
544T	-0.8
557T	-0.8
ALL TUMORS	-0.8
HCT116	-1
DKO	NA
CaCo2	-2
SW480	-0.5
LoVo	-2
HT29	-1.5

## Sheet: 369T
chrom	loc.start	loc.end	num.mark	seg.mean	SIZE	UCSC GB view
1	532833	121182415	6583	-0.019	120649583	http://genome.ucsc.edu/cgi-bin/hgTracks?db=hg19&position=chr1:482833-121232415&hgsid=443362677_4V80BwZqd7j9QbFDPX1nAl3yp6cs
1	142582362	233885120	4128	-0.3254	91302759	http://genome.ucsc.edu/cgi-bin/hgTracks?db=hg19&position=chr1:142532362-233935120&hgsid=443362677_4V80BwZqd7j9QbFDPX1nAl3yp6cs
1	233919483	234525339	25	-1.3855	605857	http://genome.ucsc.edu/cgi-bin/hgTracks?db=hg19&position=chr1:233869483-234575339&hgsid=443362677_4V80BwZqd7j9QbFDPX1nAl3yp6cs
1	234528549	249237754	948	-0.366	14709206	http://genome.ucsc.edu/cgi-bin/hgTracks?db=hg19&position=chr1:234478549-249287754&hgsid=443362677_4V80BwZqd7j9QbFDPX1nAl3yp6cs
2	38125	92242661	3969	-0.2539	92204537	http://genome.ucsc.edu/cgi-bin/hgTracks?db=hg19&position=chr2:-11875-92292661&hgsid=443362677_4V80BwZqd7j9QbFDPX1nAl3yp6cs
2	95338540	145347364	2034	-0.1867	50008825	http://genome.ucsc.edu/cgi-bin/hgTracks?db=hg19&position=chr2:95288540-145397364&hgsid=443362677_4V80BwZqd7j9QbFDPX1nAl3yp6cs
2	145348137	147753826	57	-1.1158	2405690	http://genome.ucsc.edu/cgi-bin/hgTracks?db=hg19&position=chr2:145298137-147803826&hgsid=443362677_4V80BwZqd7j9QbFDPX1nAl3yp6cs
2	147794497	243062779	3919	-0.1752	95268283	http://genome.ucsc.edu/cgi-bin/hgTracks?db=hg19&position=chr2:147744497-243112779&hgsid=443362677_4V80BwZqd7j9QbFDPX1nAl3yp6cs
3	81317	47024892	1777	-0.0222	46943576	http://genome.ucsc.edu/cgi-bin/hgTracks?db=hg19&position=chr3:31317-47074892&hgsid=443362677_4V80BwZqd7j9QbFDPX1nAl3yp6cs
3	47063609	47090250	6	1.9919	26642	http://genome.ucsc.edu/cgi-bin/hgTracks?db=hg19&position=chr3:47013609-47140250&hgsid=443362677_4V80BwZqd7j9QbFDPX1nAl3yp6cs
3	47090955	90281211	1949	0.0296	43190257	http://genome.ucsc.edu/cgi-bin/hgTracks?db=hg19&position=chr3:47040955-90331211&hgsid=443362677_4V80BwZqd7j9QbFDPX1nAl3yp6cs
3	93530026	197887341	4343	-0.0292	104357316	http://genome.ucsc.edu/cgi-bin/hgTracks?db=hg19&position=chr3:93480026-197937341&hgsid=443362677_4V80BwZqd7j9QbFDPX1nAl3yp6cs
4	50401	49619217	1914	-0.0518	49568817	http://genome.ucsc.edu/cgi-bin/hgTracks?db=hg19&position=chr4:401-49669217&hgsid=443362677_4V80BwZqd7j9QbFDPX1nAl3yp6cs
4	52747218	81415022	915	-0.1263	28667805	http://genome.ucsc.edu/cgi-bin/hgTracks?db=hg19&position=chr4:52697218-81465022&hgsid=443362677_4V80BwZqd7j9QbFDPX1nAl3yp6cs
4	81456573	81803716	7	-1.9164	347144	http://genome.ucsc.edu/cgi-bin/hgTracks?db=hg19&position=chr4:81406573-81853716&hgsid=443362677_4V80BwZqd7j9QbFDPX1nAl3yp6cs
4	81991736	190974285	3908	-0.1337	108982550	http://genome.ucsc.edu/cgi-bin/hgTracks?db=hg19&position=chr4:81941736-191024285&hgsid=443362677_4V80BwZqd7j9QbFDPX1nAl3yp6cs
5	28689	11126337	312	-0.5395	11097649	http://genome.ucsc.edu/cgi-bin/hgTracks?db=hg19&position=chr5:-21311-11176337&hgsid=443362677_4V80BwZqd7j9QbFDPX1nAl3yp6cs
5	11131825	12964650	44	-1.3168	1832826	http://genome.ucsc.edu/cgi-bin/hgTracks?db=hg19&position=chr5:11081825-13014650&hgsid=443362677_4V80BwZqd7j9QbFDPX1nAl3yp6cs
5	12984075	15470779	74	-0.2819	2486705	http://genome.ucsc.edu/cgi-bin/hgTracks?db=hg19&position=chr5:12934075-15520779&hgsid=443362677_4V80BwZqd7j9QbFDPX1nAl3yp6cs
5	15517228	16303644	21	-1.2961	786417	http://genome.ucsc.edu/cgi-bin/hgTracks?db=hg19&position=chr5:15467228-16353644&hgsid=443362677_4V80BwZqd7j9QbFDPX1nAl3yp6cs
5	16368630	46164323	1130	-0.5007	29795694	http://genome.ucsc.edu/cgi-bin/hgTracks?db=hg19&position=chr5:16318630-46214323&hgsid=443362677_4V80BwZqd7j9QbFDPX1nAl3yp6cs
5	49486520	180706713	5387	-0.188	131220194	http://genome.ucsc.edu/cgi-bin/hgTracks?db=hg19&position=chr5:49436520-180756713&hgsid=443362677_4V80BwZqd7j9QbFDPX1nAl3yp6cs
6	132520	58674548	3288	-0.2656	58542029	http://genome.ucsc.edu/cgi-bin/hgTracks?db=hg19&position=chr6:82520-58724548&hgsid=443362677_4V80BwZqd7j9QbFDPX1nAl3yp6cs
6	62041228	148947978	2886	-0.2032	86906751	http://genome.ucsc.edu/cgi-bin/hgTracks?db=hg19&position=chr6:61991228-148997978&hgsid=443362677_4V80BwZqd7j9QbFDPX1nAl3yp6cs
6	149008380	149460612	18	-1.0904	452233	http://genome.ucsc.edu/cgi-bin/hgTracks?db=hg19&position=chr6:148958380-149510612&hgsid=443362677_4V80BwZqd7j9QbFDPX1nAl3yp6cs
6	149498976	170866748	1005	-0.0937	21367773	http://genome.ucsc.edu/cgi-bin/hgTracks?db=hg19&position=chr6:149448976-170916748&hgsid=443362677_4V80BwZqd7j9QbFDPX1nAl3yp6cs
7	28262	52356042	2351	-0.4649	52327781	http://genome.ucsc.edu/cgi-bin/hgTracks?db=hg19&position=chr7:-21738-52406042&hgsid=443362677_4V80BwZqd7j9QbFDPX1nAl3yp6cs
7	52384782	54815565	61	-1.1446	2430784	http://genome.ucsc.edu/cgi-bin/hgTracks?db=hg19&position=chr7:52334782-54865565&hgsid=443362677_4V80BwZqd7j9QbFDPX1nAl3yp6cs
7	54818973	57873380	242	-0.357	3054408	http://genome.ucsc.edu/cgi-bin/hgTracks?db=hg19&position=chr7:54768973-57923380&hgsid=443362677_4V80BwZqd7j9QbFDPX1nAl3yp6cs
7	61060852	70260895	673	-0.4606	9200044	http://genome.ucsc.edu/cgi-bin/hgTracks?db=hg19&position=chr7:61010852-70310895&hgsid=443362677_4V80BwZqd7j9QbFDPX1nAl3yp6cs
7	70261858	71896007	114	-0.8867	1634150	http://genome.ucsc.edu/cgi-bin/hgTracks?db=hg19&position=chr7:70211858-71946007&hgsid=443362677_4V80BwZqd7j9QbFDPX1nAl3yp6cs
7	71919909	143069976	3336	-0.362	71150068	http://genome.ucsc.edu/cgi-bin/hgTracks?db=hg19&position=chr7:71869909-143119976&hgsid=443362677_4V80BwZqd7j9QbFDPX1nAl3yp6cs
7	143111148	147696267	168	-0.9308	4585120	http://genome.ucsc.edu/cgi-bin/hgTracks?db=hg19&position=chr7:143061148-147746267&hgsid=443362677_4V80BwZqd7j9QbFDPX1nAl3yp6cs
7	147751157	152565210	374	-0.3586	4814054	http://genome.ucsc.edu/cgi-bin/hgTracks?db=hg19&position=chr7:147701157-152615210&hgsid=443362677_4V80BwZqd7j9QbFDPX1nAl3yp6cs
7	152580400	154415961	52	-1.0173	1835562	http://genome.ucsc.edu/cgi-bin/hgTracks?db=hg19&position=chr7:152530400-154465961&hgsid=443362677_4V80BwZqd7j9QbFDPX1nAl3yp6cs
7	154418998	159109010	195	-0.3025	4690013	http://genome.ucsc.edu/cgi-bin/hgTracks?db=hg19&position=chr7:154368998-159159010&hgsid=443362677_4V80BwZqd7j9QbFDPX1nAl3yp6cs
8	207053	43801451	1934	-0.0379	43594399	http://genome.ucsc.edu/cgi-bin/hgTracks?db=hg19&position=chr8:157053-43851451&hgsid=443362677_4V80BwZqd7j9QbFDPX1nAl3yp6cs
8	46864127	56935783	387	-0.4129	10071657	http://genome.ucsc.edu/cgi-bin/hgTracks?db=hg19&position=chr8:46814127-56985783&hgsid=443362677_4V80BwZqd7j9QbFDPX1nAl3yp6cs
8	56936057	59262253	91	-1.1163	2326197	http://genome.ucsc.edu/cgi-bin/hgTracks?db=hg19&position=chr8:56886057-59312253&hgsid=443362677_4V80BwZqd7j9QbFDPX1nAl3yp6cs
8	59322896	77209357	573	-0.5097	17886462	http://genome.ucsc.edu/cgi-bin/hgTracks?db=hg19&position=chr8:59272896-77259357&hgsid=443362677_4V80BwZqd7j9QbFDPX1nAl3yp6cs
8	77237252	78684880	21	-1.7396	1447629	http://genome.ucsc.edu/cgi-bin/hgTracks?db=hg19&position=chr8:77187252-78734880&hgsid=443362677_4V80BwZqd7j9QbFDPX1nAl3yp6cs
8	78728378	87848298	264	-0.6881	9119921	http://genome.ucsc.edu/cgi-bin/hgTracks?db=hg19&position=chr8:78678378-87898298&hgsid=443362677_4V80BwZqd7j9QbFDPX1nAl3yp6cs
8	87885422	88887533	25	-1.7012	1002112	http://genome.ucsc.edu/cgi-bin/hgTracks?db=hg19&position=chr8:87835422-88937533&hgsid=443362677_4V80BwZqd7j9QbFDPX1nAl3yp6cs
8	88891108	113056702	870	-0.5315	24165595	http://genome.ucsc.edu/cgi-bin/hgTracks?db=hg19&position=chr8:88841108-113106702&hgsid=443362677_4V80BwZqd7j9QbFDPX1nAl3yp6cs
8	113120505	117631832	122	-1.3673	4511328	http://genome.ucsc.edu/cgi-bin/hgTracks?db=hg19&position=chr8:113070505-117681832&hgsid=443362677_4V80BwZqd7j9QbFDPX1nAl3yp6cs
8	117662978	146297866	1089	-0.3918	28634889	http://genome.ucsc.edu/cgi-bin/hgTracks?db=hg19&position=chr8:117612978-146347866&hgsid=443362677_4V80BwZqd7j9QbFDPX1nAl3yp6cs
9	119529	28915054	971	-0.2664	28795526	http://genome.ucsc.edu/cgi-bin/hgTracks?db=hg19&position=chr9:69529-28965054&hgsid=443362677_4V80BwZqd7j9QbFDPX1nAl3yp6cs
9	28944496	30187398	19	-1.1093	1242903	http://genome.ucsc.edu/cgi-bin/hgTracks?db=hg19&position=chr9:28894496-30237398&hgsid=443362677_4V80BwZqd7j9QbFDPX1nAl3yp6cs
9	30226486	47266171	733	-0.1557	17039686	http://genome.ucsc.edu/cgi-bin/hgTracks?db=hg19&position=chr9:30176486-47316171&hgsid=443362677_4V80BwZqd7j9QbFDPX1nAl3yp6cs
9	65525248	141067511	3894	-0.1985	75542264	http://genome.ucsc.edu/cgi-bin/hgTracks?db=hg19&position=chr9:65475248-141117511&hgsid=443362677_4V80BwZqd7j9QbFDPX1nAl3yp6cs
10	77523	16889375	908	-0.2038	16811853	http://genome.ucsc.edu/cgi-bin/hgTracks?db=hg19&position=chr10:27523-16939375&hgsid=443362677_4V80BwZqd7j9QbFDPX1nAl3yp6cs
10	16892563	17236856	15	-1.6113	344294	http://genome.ucsc.edu/cgi-bin/hgTracks?db=hg19&position=chr10:16842563-17286856&hgsid=443362677_4V80BwZqd7j9QbFDPX1nAl3yp6cs
10	17239957	39060663	1150	-0.2305	21820707	http://genome.ucsc.edu/cgi-bin/hgTracks?db=hg19&position=chr10:17189957-39110663&hgsid=443362677_4V80BwZqd7j9QbFDPX1nAl3yp6cs
10	42700411	86581946	1710	-0.1483	43881536	http://genome.ucsc.edu/cgi-bin/hgTracks?db=hg19&position=chr10:42650411-86631946&hgsid=443362677_4V80BwZqd7j9QbFDPX1nAl3yp6cs
10	86648568	86967112	11	-1.5218	318545	http://genome.ucsc.edu/cgi-bin/hgTracks?db=hg19&position=chr10:86598568-87017112&hgsid=443362677_4V80BwZqd7j9QbFDPX1nAl3yp6cs
10	86997048	135450221	2214	-0.1154	48453174	http://genome.ucsc.edu/cgi-bin/hgTracks?db=hg19&position=chr10:86947048-135500221&hgsid=443362677_4V80BwZqd7j9QbFDPX1nAl3yp6cs
11	162894	51476568	2025	-0.1983	51313675	http://genome.ucsc.edu/cgi-bin/hgTracks?db=hg19&position=chr11:112894-51526568&hgsid=443362677_4V80BwZqd7j9QbFDPX1nAl3yp6cs
11	55078389	134939114	3619	-0.0924	79860726	http://genome.ucsc.edu/cgi-bin/hgTracks?db=hg19&position=chr11:55028389-134989114&hgsid=443362677_4V80BwZqd7j9QbFDPX1nAl3yp6cs
12	164714	31547640	1549	-0.1784	31382927	http://genome.ucsc.edu/cgi-bin/hgTracks?db=hg19&position=chr12:114714-31597640&hgsid=443362677_4V80BwZqd7j9QbFDPX1nAl3yp6cs
12	31550406	31796274	36	-1.0775	245869	http://genome.ucsc.edu/cgi-bin/hgTracks?db=hg19&position=chr12:31500406-31846274&hgsid=443362677_4V80BwZqd7j9QbFDPX1nAl3yp6cs
12	31799337	34409543	200	-0.1085	2610207	http://genome.ucsc.edu/cgi-bin/hgTracks?db=hg19&position=chr12:31749337-34459543&hgsid=443362677_4V80BwZqd7j9QbFDPX1nAl3yp6cs
12	37908243	72362987	1817	-0.1238	34454745	http://genome.ucsc.edu/cgi-bin/hgTracks?db=hg19&position=chr12:37858243-72412987&hgsid=443362677_4V80BwZqd7j9QbFDPX1nAl3yp6cs
12	72381556	74877720	40	-0.9625	2496165	http://genome.ucsc.edu/cgi-bin/hgTracks?db=hg19&position=chr12:72331556-74927720&hgsid=443362677_4V80BwZqd7j9QbFDPX1nAl3yp6cs
12	74930555	133813968	3296	-0.1498	58883414	http://genome.ucsc.edu/cgi-bin/hgTracks?db=hg19&position=chr12:74880555-133863968&hgsid=443362677_4V80BwZqd7j9QbFDPX1nAl3yp6cs
13	19138503	115098018	3570	-0.8746	95959516	http://genome.ucsc.edu/cgi-bin/hgTracks?db=hg19&position=chr13:19088503-115148018&hgsid=443362677_4V80BwZqd7j9QbFDPX1nAl3yp6cs
14	19073224	29584324	445	-0.0186	10511101	http://genome.ucsc.edu/cgi-bin/hgTracks?db=hg19&position=chr14:19023224-29634324&hgsid=443362677_4V80BwZqd7j9QbFDPX1nAl3yp6cs
14	29591229	31050832	44	-0.7402	1459604	http://genome.ucsc.edu/cgi-bin/hgTracks?db=hg19&position=chr14:29541229-31100832&hgsid=443362677_4V80BwZqd7j9QbFDPX1nAl3yp6cs
14	31064268	107287357	3706	-0.0894	76223090	http://genome.ucsc.edu/cgi-bin/hgTracks?db=hg19&position=chr14:31014268-107337357&hgsid=443362677_4V80BwZqd7j9QbFDPX1nAl3yp6cs
15	20046528	102471473	4478	-0.0508	82424946	http://genome.ucsc.edu/cgi-bin/hgTracks?db=hg19&position=chr15:19996528-102521473&hgsid=443362677_4V80BwZqd7j9QbFDPX1nAl3yp6cs
16	72304	34857691	2591	-0.2345	34785388	http://genome.ucsc.edu/cgi-bin/hgTracks?db=hg19&position=chr16:22304-34907691&hgsid=443362677_4V80BwZqd7j9QbFDPX1nAl3yp6cs
16	46472193	50749419	186	-0.264	4277227	http://genome.ucsc.edu/cgi-bin/hgTracks?db=hg19&position=chr16:46422193-50799419&hgsid=443362677_4V80BwZqd7j9QbFDPX1nAl3yp6cs
16	50768573	51526174	18	-1.6057	757602	http://genome.ucsc.edu/cgi-bin/hgTracks?db=hg19&position=chr16:50718573-51576174&hgsid=443362677_4V80BwZqd7j9QbFDPX1nAl3yp6cs
16	51539407	54822218	116	-0.2434	3282812	http://genome.ucsc.edu/cgi-bin/hgTracks?db=hg19&position=chr16:51489407-54872218&hgsid=443362677_4V80BwZqd7j9QbFDPX1nAl3yp6cs
16	54823484	56125010	31	-1.0746	1301527	http://genome.ucsc.edu/cgi-bin/hgTracks?db=hg19&position=chr16:54773484-56175010&hgsid=443362677_4V80BwZqd7j9QbFDPX1nAl3yp6cs
16	56130209	59569128	216	-0.1426	3438920	http://genome.ucsc.edu/cgi-bin/hgTracks?db=hg19&position=chr16:56080209-59619128&hgsid=443362677_4V80BwZqd7j9QbFDPX1nAl3yp6cs
16	59580212	65436155	181	-0.8068	5855944	http://genome.ucsc.edu/cgi-bin/hgTracks?db=hg19&position=chr16:59530212-65486155&hgsid=443362677_4V80BwZqd7j9QbFDPX1nAl3yp6cs
16	65446293	75929064	1022	-0.115	10482772	http://genome.ucsc.edu/cgi-bin/hgTracks?db=hg19&position=chr16:65396293-75979064&hgsid=443362677_4V80BwZqd7j9QbFDPX1nAl3yp6cs
16	75988649	77193521	39	-1.063	1204873	http://genome.ucsc.edu/cgi-bin/hgTracks?db=hg19&position=chr16:75938649-77243521&hgsid=443362677_4V80BwZqd7j9QbFDPX1nAl3yp6cs
16	77199381	90215975	726	-0.1507	13016595	http://genome.ucsc.edu/cgi-bin/hgTracks?db=hg19&position=chr16:77149381-90265975&hgsid=443362677_4V80BwZqd7j9QbFDPX1nAl3yp6cs
17	8759	21932497	2328	0.0315	21923739	http://genome.ucsc.edu/cgi-bin/hgTracks?db=hg19&position=chr17:-41241-21982497&hgsid=443362677_4V80BwZqd7j9QbFDPX1nAl3yp6cs
17	25344898	81118278	4656	-0.085	55773381	http://genome.ucsc.edu/cgi-bin/hgTracks?db=hg19&position=chr17:25294898-81168278&hgsid=443362677_4V80BwZqd7j9QbFDPX1nAl3yp6cs
18	31915	15371135	824	-0.1548	15339221	http://genome.ucsc.edu/cgi-bin/hgTracks?db=hg19&position=chr18:-18085-15421135&hgsid=443362677_4V80BwZqd7j9QbFDPX1nAl3yp6cs
18	18553834	77977184	2155	-0.1202	59423351	http://genome.ucsc.edu/cgi-bin/hgTracks?db=hg19&position=chr18:18503834-78027184&hgsid=443362677_4V80BwZqd7j9QbFDPX1nAl3yp6cs
19	183513	20040671	2988	-0.1293	19857159	http://genome.ucsc.edu/cgi-bin/hgTracks?db=hg19&position=chr19:133513-20090671&hgsid=443362677_4V80BwZqd7j9QbFDPX1nAl3yp6cs
19	20085058	21021655	74	-1.0071	936598	http://genome.ucsc.edu/cgi-bin/hgTracks?db=hg19&position=chr19:20035058-21071655&hgsid=443362677_4V80BwZqd7j9QbFDPX1nAl3yp6cs
19	21106815	24494920	303	-0.3548	3388106	http://genome.ucsc.edu/cgi-bin/hgTracks?db=hg19&position=chr19:21056815-24544920&hgsid=443362677_4V80BwZqd7j9QbFDPX1nAl3yp6cs
19	28126214	59093829	3149	-0.2089	30967616	http://genome.ucsc.edu/cgi-bin/hgTracks?db=hg19&position=chr19:28076214-59143829&hgsid=443362677_4V80BwZqd7j9QbFDPX1nAl3yp6cs
20	82019	26248131	1035	-0.3406	26166113	http://genome.ucsc.edu/cgi-bin/hgTracks?db=hg19&position=chr20:32019-26298131&hgsid=443362677_4V80BwZqd7j9QbFDPX1nAl3yp6cs
20	29442630	62934100	2131	-0.4133	33491471	http://genome.ucsc.edu/cgi-bin/hgTracks?db=hg19&position=chr20:29392630-62984100&hgsid=443362677_4V80BwZqd7j9QbFDPX1nAl3yp6cs
21	9418291	11154720	63	-0.0566	1736430	http://genome.ucsc.edu/cgi-bin/hgTracks?db=hg19&position=chr21:9368291-11204720&hgsid=443362677_4V80BwZqd7j9QbFDPX1nAl3yp6cs
21	14383121	19117892	178	-0.2426	4734772	http://genome.ucsc.edu/cgi-bin/hgTracks?db=hg19&position=chr21:14333121-19167892&hgsid=443362677_4V80BwZqd7j9QbFDPX1nAl3yp6cs
21	19138634	19326251	7	-1.338	187618	http://genome.ucsc.edu/cgi-bin/hgTracks?db=hg19&position=chr21:19088634-19376251&hgsid=443362677_4V80BwZqd7j9QbFDPX1nAl3yp6cs
21	19335305	22444323	123	-0.3378	3109019	http://genome.ucsc.edu/cgi-bin/hgTracks?db=hg19&position=chr21:19285305-22494323&hgsid=443362677_4V80BwZqd7j9QbFDPX1nAl3yp6cs
21	22454469	26865804	159	-0.7892	4411336	http://genome.ucsc.edu/cgi-bin/hgTracks?db=hg19&position=chr21:22404469-26915804&hgsid=443362677_4V80BwZqd7j9QbFDPX1nAl3yp6cs
21	26949494	48117364	1099	-0.1993	21167871	http://genome.ucsc.edu/cgi-bin/hgTracks?db=hg19&position=chr21:26899494-48167364&hgsid=443362677_4V80BwZqd7j9QbFDPX1nAl3yp6cs
22	16080687	28364835	852	0.0224	12284149	http://genome.ucsc.edu/cgi-bin/hgTracks?db=hg19&position=chr22:16030687-28414835&hgsid=443362677_4V80BwZqd7j9QbFDPX1nAl3yp6cs
22	28439155	29068249	33	-0.8186	629095	http://genome.ucsc.edu/cgi-bin/hgTracks?db=hg19&position=chr22:28389155-29118249&hgsid=443362677_4V80BwZqd7j9QbFDPX1nAl3yp6cs
22	29076413	34607242	565	0.0361	5530830	http://genome.ucsc.edu/cgi-bin/hgTracks?db=hg19&position=chr22:29026413-34657242&hgsid=443362677_4V80BwZqd7j9QbFDPX1nAl3yp6cs
22	34612097	34834545	8	-1.5458	222449	http://genome.ucsc.edu/cgi-bin/hgTracks?db=hg19&position=chr22:34562097-34884545&hgsid=443362677_4V80BwZqd7j9QbFDPX1nAl3yp6cs
22	34848256	51244237	1460	0.0196	16395982	http://genome.ucsc.edu/cgi-bin/hgTracks?db=hg19&position=chr22:34798256-51294237&hgsid=443362677_4V80BwZqd7j9QbFDPX1nAl3yp6cs
23	219332	58421316	2636	-0.312	58201985	http://genome.ucsc.edu/cgi-bin/hgTracks?db=hg19&position=chr23:169332-58471316&hgsid=443362677_4V80BwZqd7j9QbFDPX1nAl3yp6cs
23	62141982	154819035	2964	-0.36	92677054	http://genome.ucsc.edu/cgi-bin/hgTracks?db=hg19&position=chr23:62091982-154869035&hgsid=443362677_4V80BwZqd7j9QbFDPX1nAl3yp6cs
24	148518	10032472	127	-0.0656	9883955	http://genome.ucsc.edu/cgi-bin/hgTracks?db=hg19&position=chr24:98518-10082472&hgsid=443362677_4V80BwZqd7j9QbFDPX1nAl3yp6cs
24	13132760	59327398	163	-0.2123	46194639	http://genome.ucsc.edu/cgi-bin/hgTracks?db=hg19&position=chr24:13082760-59377398&hgsid=443362677_4V80BwZqd7j9QbFDPX1nAl3yp6cs

## Sheet: 544T
chrom	loc.start	loc.end	num.mark	seg.mean	SIZE	UCSC GB view
1	532833	4065980	208	-0.3407	3533148	http://genome.ucsc.edu/cgi-bin/hgTracks?db=hg19&position=chr1:482833-4115980&hgsid=443362677_4V80BwZqd7j9QbFDPX1nAl3yp6cs
1	4114512	5844486	48	-1.1977	1729975	http://genome.ucsc.edu/cgi-bin/hgTracks?db=hg19&position=chr1:4064512-5894486&hgsid=443362677_4V80BwZqd7j9QbFDPX1nAl3yp6cs
1	5872263	6943049	111	-0.1728	1070787	http://genome.ucsc.edu/cgi-bin/hgTracks?db=hg19&position=chr1:5822263-6993049&hgsid=443362677_4V80BwZqd7j9QbFDPX1nAl3yp6cs
1	6965346	7826011	28	-1.2104	860666	http://genome.ucsc.edu/cgi-bin/hgTracks?db=hg19&position=chr1:6915346-7876011&hgsid=443362677_4V80BwZqd7j9QbFDPX1nAl3yp6cs
1	7839179	11405739	473	-0.266	3566561	http://genome.ucsc.edu/cgi-bin/hgTracks?db=hg19&position=chr1:7789179-11455739&hgsid=443362677_4V80BwZqd7j9QbFDPX1nAl3yp6cs
1	11413688	11704868	34	-1.0928	291181	http://genome.ucsc.edu/cgi-bin/hgTracks?db=hg19&position=chr1:11363688-11754868&hgsid=443362677_4V80BwZqd7j9QbFDPX1nAl3yp6cs
1	11725710	12890772	112	-0.3265	1165063	http://genome.ucsc.edu/cgi-bin/hgTracks?db=hg19&position=chr1:11675710-12940772&hgsid=443362677_4V80BwZqd7j9QbFDPX1nAl3yp6cs
1	12898223	13951859	43	-1.096	1053637	http://genome.ucsc.edu/cgi-bin/hgTracks?db=hg19&position=chr1:12848223-14001859&hgsid=443362677_4V80BwZqd7j9QbFDPX1nAl3yp6cs
1	13952252	14418678	32	-0.3224	466427	http://genome.ucsc.edu/cgi-bin/hgTracks?db=hg19&position=chr1:13902252-14468678&hgsid=443362677_4V80BwZqd7j9QbFDPX1nAl3yp6cs
1	14453525	14955435	29	-1.7637	501911	http://genome.ucsc.edu/cgi-bin/hgTracks?db=hg19&position=chr1:14403525-15005435&hgsid=443362677_4V80BwZqd7j9QbFDPX1nAl3yp6cs
1	14968820	36957399	1932	-0.2968	21988580	http://genome.ucsc.edu/cgi-bin/hgTracks?db=hg19&position=chr1:14918820-37007399&hgsid=443362677_4V80BwZqd7j9QbFDPX1nAl3yp6cs
1	36975031	37468372	21	-1.5269	493342	http://genome.ucsc.edu/cgi-bin/hgTracks?db=hg19&position=chr1:36925031-37518372&hgsid=443362677_4V80BwZqd7j9QbFDPX1nAl3yp6cs
1	37476435	38497806	63	-0.2935	1021372	http://genome.ucsc.edu/cgi-bin/hgTracks?db=hg19&position=chr1:37426435-38547806&hgsid=443362677_4V80BwZqd7j9QbFDPX1nAl3yp6cs
1	38504073	39272603	27	-1.5868	768531	http://genome.ucsc.edu/cgi-bin/hgTracks?db=hg19&position=chr1:38454073-39322603&hgsid=443362677_4V80BwZqd7j9QbFDPX1nAl3yp6cs
1	39294605	49044992	785	-0.2676	9750388	http://genome.ucsc.edu/cgi-bin/hgTracks?db=hg19&position=chr1:39244605-49094992&hgsid=443362677_4V80BwZqd7j9QbFDPX1nAl3yp6cs
1	49088248	50733724	24	-1.166	1645477	http://genome.ucsc.edu/cgi-bin/hgTracks?db=hg19&position=chr1:49038248-50783724&hgsid=443362677_4V80BwZqd7j9QbFDPX1nAl3yp6cs
1	50762667	51544061	38	-0.1251	781395	http://genome.ucsc.edu/cgi-bin/hgTracks?db=hg19&position=chr1:50712667-51594061&hgsid=443362677_4V80BwZqd7j9QbFDPX1nAl3yp6cs
1	51551977	51727452	14	-1.5772	175476	http://genome.ucsc.edu/cgi-bin/hgTracks?db=hg19&position=chr1:51501977-51777452&hgsid=443362677_4V80BwZqd7j9QbFDPX1nAl3yp6cs
1	51744301	55640992	311	-0.1781	3896692	http://genome.ucsc.edu/cgi-bin/hgTracks?db=hg19&position=chr1:51694301-55690992&hgsid=443362677_4V80BwZqd7j9QbFDPX1nAl3yp6cs
1	55647817	58798674	77	-1.305	3150858	http://genome.ucsc.edu/cgi-bin/hgTracks?db=hg19&position=chr1:55597817-58848674&hgsid=443362677_4V80BwZqd7j9QbFDPX1nAl3yp6cs
1	58862661	60616296	44	-0.0749	1753636	http://genome.ucsc.edu/cgi-bin/hgTracks?db=hg19&position=chr1:58812661-60666296&hgsid=443362677_4V80BwZqd7j9QbFDPX1nAl3yp6cs
1	60629025	61216337	10	-1.351	587313	http://genome.ucsc.edu/cgi-bin/hgTracks?db=hg19&position=chr1:60579025-61266337&hgsid=443362677_4V80BwZqd7j9QbFDPX1nAl3yp6cs
1	61230597	62630645	79	-0.1579	1400049	http://genome.ucsc.edu/cgi-bin/hgTracks?db=hg19&position=chr1:61180597-62680645&hgsid=443362677_4V80BwZqd7j9QbFDPX1nAl3yp6cs
1	62654580	62880606	24	-1.4221	226027	http://genome.ucsc.edu/cgi-bin/hgTracks?db=hg19&position=chr1:62604580-62930606&hgsid=443362677_4V80BwZqd7j9QbFDPX1nAl3yp6cs
1	62882752	63312772	37	-0.0673	430021	http://genome.ucsc.edu/cgi-bin/hgTracks?db=hg19&position=chr1:62832752-63362772&hgsid=443362677_4V80BwZqd7j9QbFDPX1nAl3yp6cs
1	63336469	63761688	24	-1.4236	425220	http://genome.ucsc.edu/cgi-bin/hgTracks?db=hg19&position=chr1:63286469-63811688&hgsid=443362677_4V80BwZqd7j9QbFDPX1nAl3yp6cs
1	63766223	68973830	228	-0.3924	5207608	http://genome.ucsc.edu/cgi-bin/hgTracks?db=hg19&position=chr1:63716223-69023830&hgsid=443362677_4V80BwZqd7j9QbFDPX1nAl3yp6cs
1	69060232	70574797	31	-1.2707	1514566	http://genome.ucsc.edu/cgi-bin/hgTracks?db=hg19&position=chr1:69010232-70624797&hgsid=443362677_4V80BwZqd7j9QbFDPX1nAl3yp6cs
1	70661409	70959914	27	-0.2218	298506	http://genome.ucsc.edu/cgi-bin/hgTracks?db=hg19&position=chr1:70611409-71009914&hgsid=443362677_4V80BwZqd7j9QbFDPX1nAl3yp6cs
1	70988375	77859824	158	-1.1849	6871450	http://genome.ucsc.edu/cgi-bin/hgTracks?db=hg19&position=chr1:70938375-77909824&hgsid=443362677_4V80BwZqd7j9QbFDPX1nAl3yp6cs
1	77876055	78719256	62	-0.1959	843202	http://genome.ucsc.edu/cgi-bin/hgTracks?db=hg19&position=chr1:77826055-78769256&hgsid=443362677_4V80BwZqd7j9QbFDPX1nAl3yp6cs
1	78766215	81289773	49	-1.3376	2523559	http://genome.ucsc.edu/cgi-bin/hgTracks?db=hg19&position=chr1:78716215-81339773&hgsid=443362677_4V80BwZqd7j9QbFDPX1nAl3yp6cs
1	81363847	83909123	71	-0.4345	2545277	http://genome.ucsc.edu/cgi-bin/hgTracks?db=hg19&position=chr1:81313847-83959123&hgsid=443362677_4V80BwZqd7j9QbFDPX1nAl3yp6cs
1	84013256	84528830	16	-1.8332	515575	http://genome.ucsc.edu/cgi-bin/hgTracks?db=hg19&position=chr1:83963256-84578830&hgsid=443362677_4V80BwZqd7j9QbFDPX1nAl3yp6cs
1	84714489	95542228	447	-0.3419	10827740	http://genome.ucsc.edu/cgi-bin/hgTracks?db=hg19&position=chr1:84664489-95592228&hgsid=443362677_4V80BwZqd7j9QbFDPX1nAl3yp6cs
1	95547564	97176089	37	-1.161	1628526	http://genome.ucsc.edu/cgi-bin/hgTracks?db=hg19&position=chr1:95497564-97226089&hgsid=443362677_4V80BwZqd7j9QbFDPX1nAl3yp6cs
1	97195385	100957220	115	-0.4091	3761836	http://genome.ucsc.edu/cgi-bin/hgTracks?db=hg19&position=chr1:97145385-101007220&hgsid=443362677_4V80BwZqd7j9QbFDPX1nAl3yp6cs
1	100981032	108510760	187	-1.1797	7529729	http://genome.ucsc.edu/cgi-bin/hgTracks?db=hg19&position=chr1:100931032-108560760&hgsid=443362677_4V80BwZqd7j9QbFDPX1nAl3yp6cs
1	108512112	121182415	527	-0.2464	12670304	http://genome.ucsc.edu/cgi-bin/hgTracks?db=hg19&position=chr1:108462112-121232415&hgsid=443362677_4V80BwZqd7j9QbFDPX1nAl3yp6cs
1	142582362	143472733	28	-1.3686	890372	http://genome.ucsc.edu/cgi-bin/hgTracks?db=hg19&position=chr1:142532362-143522733&hgsid=443362677_4V80BwZqd7j9QbFDPX1nAl3yp6cs
1	143666300	156966489	930	-0.2507	13300190	http://genome.ucsc.edu/cgi-bin/hgTracks?db=hg19&position=chr1:143616300-157016489&hgsid=443362677_4V80BwZqd7j9QbFDPX1nAl3yp6cs
1	157006206	159827289	96	-1.0112	2821084	http://genome.ucsc.edu/cgi-bin/hgTracks?db=hg19&position=chr1:156956206-159877289&hgsid=443362677_4V80BwZqd7j9QbFDPX1nAl3yp6cs
1	159856054	162820436	177	-0.3589	2964383	http://genome.ucsc.edu/cgi-bin/hgTracks?db=hg19&position=chr1:159806054-162870436&hgsid=443362677_4V80BwZqd7j9QbFDPX1nAl3yp6cs
1	162833733	167585488	156	-0.9158	4751756	http://genome.ucsc.edu/cgi-bin/hgTracks?db=hg19&position=chr1:162783733-167635488&hgsid=443362677_4V80BwZqd7j9QbFDPX1nAl3yp6cs
1	167605916	176346286	337	-0.3501	8740371	http://genome.ucsc.edu/cgi-bin/hgTracks?db=hg19&position=chr1:167555916-176396286&hgsid=443362677_4V80BwZqd7j9QbFDPX1nAl3yp6cs
1	176383469	177165678	22	-1.9277	782210	http://genome.ucsc.edu/cgi-bin/hgTracks?db=hg19&position=chr1:176333469-177215678&hgsid=443362677_4V80BwZqd7j9QbFDPX1nAl3yp6cs
1	177210200	187041627	424	-0.4295	9831428	http://genome.ucsc.edu/cgi-bin/hgTracks?db=hg19&position=chr1:177160200-187091627&hgsid=443362677_4V80BwZqd7j9QbFDPX1nAl3yp6cs
1	187063382	192197128	136	-1.245	5133747	http://genome.ucsc.edu/cgi-bin/hgTracks?db=hg19&position=chr1:187013382-192247128&hgsid=443362677_4V80BwZqd7j9QbFDPX1nAl3yp6cs
1	192317248	193532919	35	-0.1477	1215672	http://genome.ucsc.edu/cgi-bin/hgTracks?db=hg19&position=chr1:192267248-193582919&hgsid=443362677_4V80BwZqd7j9QbFDPX1nAl3yp6cs
1	193590657	194912991	32	-1.175	1322335	http://genome.ucsc.edu/cgi-bin/hgTracks?db=hg19&position=chr1:193540657-194962991&hgsid=443362677_4V80BwZqd7j9QbFDPX1nAl3yp6cs
1	194927617	208487159	606	-0.3096	13559543	http://genome.ucsc.edu/cgi-bin/hgTracks?db=hg19&position=chr1:194877617-208537159&hgsid=443362677_4V80BwZqd7j9QbFDPX1nAl3yp6cs
1	208532887	211416659	100	-1.2994	2883773	http://genome.ucsc.edu/cgi-bin/hgTracks?db=hg19&position=chr1:208482887-211466659&hgsid=443362677_4V80BwZqd7j9QbFDPX1nAl3yp6cs
1	211430255	214849761	194	-0.3191	3419507	http://genome.ucsc.edu/cgi-bin/hgTracks?db=hg19&position=chr1:211380255-214899761&hgsid=443362677_4V80BwZqd7j9QbFDPX1nAl3yp6cs
1	214855629	215677070	16	-1.4614	821442	http://genome.ucsc.edu/cgi-bin/hgTracks?db=hg19&position=chr1:214805629-215727070&hgsid=443362677_4V80BwZqd7j9QbFDPX1nAl3yp6cs
1	215750003	216384247	17	-0.2697	634245	http://genome.ucsc.edu/cgi-bin/hgTracks?db=hg19&position=chr1:215700003-216434247&hgsid=443362677_4V80BwZqd7j9QbFDPX1nAl3yp6cs
1	216543189	217588881	30	-1.9062	1045693	http://genome.ucsc.edu/cgi-bin/hgTracks?db=hg19&position=chr1:216493189-217638881&hgsid=443362677_4V80BwZqd7j9QbFDPX1nAl3yp6cs
1	217631496	224757578	294	-0.4251	7126083	http://genome.ucsc.edu/cgi-bin/hgTracks?db=hg19&position=chr1:217581496-224807578&hgsid=443362677_4V80BwZqd7j9QbFDPX1nAl3yp6cs
1	224824746	225557908	23	-1.4836	733163	http://genome.ucsc.edu/cgi-bin/hgTracks?db=hg19&position=chr1:224774746-225607908&hgsid=443362677_4V80BwZqd7j9QbFDPX1nAl3yp6cs
1	225561091	236768607	703	-0.3532	11207517	http://genome.ucsc.edu/cgi-bin/hgTracks?db=hg19&position=chr1:225511091-236818607&hgsid=443362677_4V80BwZqd7j9QbFDPX1nAl3yp6cs
1	236777020	239334825	115	-1.1587	2557806	http://genome.ucsc.edu/cgi-bin/hgTracks?db=hg19&position=chr1:236727020-239384825&hgsid=443362677_4V80BwZqd7j9QbFDPX1nAl3yp6cs
1	239340935	240111914	46	-0.0677	770980	http://genome.ucsc.edu/cgi-bin/hgTracks?db=hg19&position=chr1:239290935-240161914&hgsid=443362677_4V80BwZqd7j9QbFDPX1nAl3yp6cs
1	240168672	240856176	55	-1.6273	687505	http://genome.ucsc.edu/cgi-bin/hgTracks?db=hg19&position=chr1:240118672-240906176&hgsid=443362677_4V80BwZqd7j9QbFDPX1nAl3yp6cs
1	240864598	242153747	86	-0.4571	1289150	http://genome.ucsc.edu/cgi-bin/hgTracks?db=hg19&position=chr1:240814598-242203747&hgsid=443362677_4V80BwZqd7j9QbFDPX1nAl3yp6cs
1	242176076	243022875	58	-1.3316	846800	http://genome.ucsc.edu/cgi-bin/hgTracks?db=hg19&position=chr1:242126076-243072875&hgsid=443362677_4V80BwZqd7j9QbFDPX1nAl3yp6cs
1	243023938	243642184	44	-0.4151	618247	http://genome.ucsc.edu/cgi-bin/hgTracks?db=hg19&position=chr1:242973938-243692184&hgsid=443362677_4V80BwZqd7j9QbFDPX1nAl3yp6cs
1	243672060	244527499	40	-1.2655	855440	http://genome.ucsc.edu/cgi-bin/hgTracks?db=hg19&position=chr1:243622060-244577499&hgsid=443362677_4V80BwZqd7j9QbFDPX1nAl3yp6cs
1	244540516	247439947	244	-0.3628	2899432	http://genome.ucsc.edu/cgi-bin/hgTracks?db=hg19&position=chr1:244490516-247489947&hgsid=443362677_4V80BwZqd7j9QbFDPX1nAl3yp6cs
1	247441824	249237754	57	-1.1898	1795931	http://genome.ucsc.edu/cgi-bin/hgTracks?db=hg19&position=chr1:247391824-249287754&hgsid=443362677_4V80BwZqd7j9QbFDPX1nAl3yp6cs
2	38125	7816463	175	-1.0859	7778339	http://genome.ucsc.edu/cgi-bin/hgTracks?db=hg19&position=chr2:-11875-7866463&hgsid=443362677_4V80BwZqd7j9QbFDPX1nAl3yp6cs
2	7821931	11599934	244	-0.3158	3778004	http://genome.ucsc.edu/cgi-bin/hgTracks?db=hg19&position=chr2:7771931-11649934&hgsid=443362677_4V80BwZqd7j9QbFDPX1nAl3yp6cs
2	11625064	14183178	82	-1.0001	2558115	http://genome.ucsc.edu/cgi-bin/hgTracks?db=hg19&position=chr2:11575064-14233178&hgsid=443362677_4V80BwZqd7j9QbFDPX1nAl3yp6cs
2	14192018	21037292	174	-0.4514	6845275	http://genome.ucsc.edu/cgi-bin/hgTracks?db=hg19&position=chr2:14142018-21087292&hgsid=443362677_4V80BwZqd7j9QbFDPX1nAl3yp6cs
2	21096574	23026190	53	-1.4623	1929617	http://genome.ucsc.edu/cgi-bin/hgTracks?db=hg19&position=chr2:21046574-23076190&hgsid=443362677_4V80BwZqd7j9QbFDPX1nAl3yp6cs
2	23061989	29418525	507	-0.3297	6356537	http://genome.ucsc.edu/cgi-bin/hgTracks?db=hg19&position=chr2:23011989-29468525&hgsid=443362677_4V80BwZqd7j9QbFDPX1nAl3yp6cs
2	29432332	30308606	25	-1.4936	876275	http://genome.ucsc.edu/cgi-bin/hgTracks?db=hg19&position=chr2:29382332-30358606&hgsid=443362677_4V80BwZqd7j9QbFDPX1nAl3yp6cs
2	30318997	33825509	231	-0.2657	3506513	http://genome.ucsc.edu/cgi-bin/hgTracks?db=hg19&position=chr2:30268997-33875509&hgsid=443362677_4V80BwZqd7j9QbFDPX1nAl3yp6cs
2	33830999	36998593	116	-1.458	3167595	http://genome.ucsc.edu/cgi-bin/hgTracks?db=hg19&position=chr2:33780999-37048593&hgsid=443362677_4V80BwZqd7j9QbFDPX1nAl3yp6cs
2	37022648	39828568	188	-0.2558	2805921	http://genome.ucsc.edu/cgi-bin/hgTracks?db=hg19&position=chr2:36972648-39878568&hgsid=443362677_4V80BwZqd7j9QbFDPX1nAl3yp6cs
2	39834457	42079731	42	-1.3219	2245275	http://genome.ucsc.edu/cgi-bin/hgTracks?db=hg19&position=chr2:39784457-42129731&hgsid=443362677_4V80BwZqd7j9QbFDPX1nAl3yp6cs
2	42089674	48780719	379	-0.2879	6691046	http://genome.ucsc.edu/cgi-bin/hgTracks?db=hg19&position=chr2:42039674-48830719&hgsid=443362677_4V80BwZqd7j9QbFDPX1nAl3yp6cs
2	48785286	53844194	126	-0.7296	5058909	http://genome.ucsc.edu/cgi-bin/hgTracks?db=hg19&position=chr2:48735286-53894194&hgsid=443362677_4V80BwZqd7j9QbFDPX1nAl3yp6cs
2	53871754	56030591	120	-0.1689	2158838	http://genome.ucsc.edu/cgi-bin/hgTracks?db=hg19&position=chr2:53821754-56080591&hgsid=443362677_4V80BwZqd7j9QbFDPX1nAl3yp6cs
2	56051504	59695431	87	-1.0133	3643928	http://genome.ucsc.edu/cgi-bin/hgTracks?db=hg19&position=chr2:56001504-59745431&hgsid=443362677_4V80BwZqd7j9QbFDPX1nAl3yp6cs
2	59758800	68491275	473	-0.2129	8732476	http://genome.ucsc.edu/cgi-bin/hgTracks?db=hg19&position=chr2:59708800-68541275&hgsid=443362677_4V80BwZqd7j9QbFDPX1nAl3yp6cs
2	68523862	68614230	7	-2.1506	90369	http://genome.ucsc.edu/cgi-bin/hgTracks?db=hg19&position=chr2:68473862-68664230&hgsid=443362677_4V80BwZqd7j9QbFDPX1nAl3yp6cs
2	68674725	75864113	391	-0.3329	7189389	http://genome.ucsc.edu/cgi-bin/hgTracks?db=hg19&position=chr2:68624725-75914113&hgsid=443362677_4V80BwZqd7j9QbFDPX1nAl3yp6cs
2	75935730	83919706	228	-1.4126	7983977	http://genome.ucsc.edu/cgi-bin/hgTracks?db=hg19&position=chr2:75885730-83969706&hgsid=443362677_4V80BwZqd7j9QbFDPX1nAl3yp6cs
2	83932076	88221736	218	-0.2895	4289661	http://genome.ucsc.edu/cgi-bin/hgTracks?db=hg19&position=chr2:83882076-88271736&hgsid=443362677_4V80BwZqd7j9QbFDPX1nAl3yp6cs
2	88266851	92242661	103	-0.9655	3975811	http://genome.ucsc.edu/cgi-bin/hgTracks?db=hg19&position=chr2:88216851-92292661&hgsid=443362677_4V80BwZqd7j9QbFDPX1nAl3yp6cs
2	95338540	95682019	14	-1.1904	343480	http://genome.ucsc.edu/cgi-bin/hgTracks?db=hg19&position=chr2:95288540-95732019&hgsid=443362677_4V80BwZqd7j9QbFDPX1nAl3yp6cs
2	95693549	100123311	234	-0.2311	4429763	http://genome.ucsc.edu/cgi-bin/hgTracks?db=hg19&position=chr2:95643549-100173311&hgsid=443362677_4V80BwZqd7j9QbFDPX1nAl3yp6cs
2	100131436	101148659	45	-1.3184	1017224	http://genome.ucsc.edu/cgi-bin/hgTracks?db=hg19&position=chr2:100081436-101198659&hgsid=443362677_4V80BwZqd7j9QbFDPX1nAl3yp6cs
2	101152166	103438371	154	-0.3239	2286206	http://genome.ucsc.edu/cgi-bin/hgTracks?db=hg19&position=chr2:101102166-103488371&hgsid=443362677_4V80BwZqd7j9QbFDPX1nAl3yp6cs
2	103482848	104324516	34	-1.4073	841669	http://genome.ucsc.edu/cgi-bin/hgTracks?db=hg19&position=chr2:103432848-104374516&hgsid=443362677_4V80BwZqd7j9QbFDPX1nAl3yp6cs
2	104382852	107146927	107	-0.4897	2764076	http://genome.ucsc.edu/cgi-bin/hgTracks?db=hg19&position=chr2:104332852-107196927&hgsid=443362677_4V80BwZqd7j9QbFDPX1nAl3yp6cs
2	107165543	108364762	30	-1.3652	1199220	http://genome.ucsc.edu/cgi-bin/hgTracks?db=hg19&position=chr2:107115543-108414762&hgsid=443362677_4V80BwZqd7j9QbFDPX1nAl3yp6cs
2	108398055	111439107	118	-0.2219	3041053	http://genome.ucsc.edu/cgi-bin/hgTracks?db=hg19&position=chr2:108348055-111489107&hgsid=443362677_4V80BwZqd7j9QbFDPX1nAl3yp6cs
2	111513796	111734887	8	-1.7874	221092	http://genome.ucsc.edu/cgi-bin/hgTracks?db=hg19&position=chr2:111463796-111784887&hgsid=443362677_4V80BwZqd7j9QbFDPX1nAl3yp6cs
2	111738859	115511410	177	-0.3524	3772552	http://genome.ucsc.edu/cgi-bin/hgTracks?db=hg19&position=chr2:111688859-115561410&hgsid=443362677_4V80BwZqd7j9QbFDPX1nAl3yp6cs
2	115537637	118551567	89	-1.3597	3013931	http://genome.ucsc.edu/cgi-bin/hgTracks?db=hg19&position=chr2:115487637-118601567&hgsid=443362677_4V80BwZqd7j9QbFDPX1nAl3yp6cs
2	118592315	122512104	161	-0.3416	3919790	http://genome.ucsc.edu/cgi-bin/hgTracks?db=hg19&position=chr2:118542315-122562104&hgsid=443362677_4V80BwZqd7j9QbFDPX1nAl3yp6cs
2	122514409	127794131	154	-1.1329	5279723	http://genome.ucsc.edu/cgi-bin/hgTracks?db=hg19&position=chr2:122464409-127844131&hgsid=443362677_4V80BwZqd7j9QbFDPX1nAl3yp6cs
2	127857182	129006147	111	-0.3267	1148966	http://genome.ucsc.edu/cgi-bin/hgTracks?db=hg19&position=chr2:127807182-129056147&hgsid=443362677_4V80BwZqd7j9QbFDPX1nAl3yp6cs
2	129022086	130518107	56	-1.65	1496022	http://genome.ucsc.edu/cgi-bin/hgTracks?db=hg19&position=chr2:128972086-130568107&hgsid=443362677_4V80BwZqd7j9QbFDPX1nAl3yp6cs
2	130606507	131899137	93	-0.346	1292631	http://genome.ucsc.edu/cgi-bin/hgTracks?db=hg19&position=chr2:130556507-131949137&hgsid=443362677_4V80BwZqd7j9QbFDPX1nAl3yp6cs
2	131920951	135769031	138	-0.8762	3848081	http://genome.ucsc.edu/cgi-bin/hgTracks?db=hg19&position=chr2:131870951-135819031&hgsid=443362677_4V80BwZqd7j9QbFDPX1nAl3yp6cs
2	135775785	136916026	95	-0.1365	1140242	http://genome.ucsc.edu/cgi-bin/hgTracks?db=hg19&position=chr2:135725785-136966026&hgsid=443362677_4V80BwZqd7j9QbFDPX1nAl3yp6cs
2	136930041	138649645	42	-1.2036	1719605	http://genome.ucsc.edu/cgi-bin/hgTracks?db=hg19&position=chr2:136880041-138699645&hgsid=443362677_4V80BwZqd7j9QbFDPX1nAl3yp6cs
2	138661256	139336581	14	-0.1011	675326	http://genome.ucsc.edu/cgi-bin/hgTracks?db=hg19&position=chr2:138611256-139386581&hgsid=443362677_4V80BwZqd7j9QbFDPX1nAl3yp6cs
2	139379430	144688200	135	-1.3695	5308771	http://genome.ucsc.edu/cgi-bin/hgTracks?db=hg19&position=chr2:139329430-144738200&hgsid=443362677_4V80BwZqd7j9QbFDPX1nAl3yp6cs
2	144699166	145114958	19	-0.1887	415793	http://genome.ucsc.edu/cgi-bin/hgTracks?db=hg19&position=chr2:144649166-145164958&hgsid=443362677_4V80BwZqd7j9QbFDPX1nAl3yp6cs
2	145120977	147753826	63	-1.407	2632850	http://genome.ucsc.edu/cgi-bin/hgTracks?db=hg19&position=chr2:145070977-147803826&hgsid=443362677_4V80BwZqd7j9QbFDPX1nAl3yp6cs
2	147794497	153670814	202	-0.4045	5876318	http://genome.ucsc.edu/cgi-bin/hgTracks?db=hg19&position=chr2:147744497-153720814&hgsid=443362677_4V80BwZqd7j9QbFDPX1nAl3yp6cs
2	153678182	156772745	69	-1.375	3094564	http://genome.ucsc.edu/cgi-bin/hgTracks?db=hg19&position=chr2:153628182-156822745&hgsid=443362677_4V80BwZqd7j9QbFDPX1nAl3yp6cs
2	156897706	161312287	145	-0.2405	4414582	http://genome.ucsc.edu/cgi-bin/hgTracks?db=hg19&position=chr2:156847706-161362287&hgsid=443362677_4V80BwZqd7j9QbFDPX1nAl3yp6cs
2	161333158	168992803	201	-1.0027	7659646	http://genome.ucsc.edu/cgi-bin/hgTracks?db=hg19&position=chr2:161283158-169042803&hgsid=443362677_4V80BwZqd7j9QbFDPX1nAl3yp6cs
2	169025417	175068615	330	-0.2387	6043199	http://genome.ucsc.edu/cgi-bin/hgTracks?db=hg19&position=chr2:168975417-175118615&hgsid=443362677_4V80BwZqd7j9QbFDPX1nAl3yp6cs
2	175090851	177969044	127	-1.0779	2878194	http://genome.ucsc.edu/cgi-bin/hgTracks?db=hg19&position=chr2:175040851-178019044&hgsid=443362677_4V80BwZqd7j9QbFDPX1nAl3yp6cs
2	177975496	187735529	279	-0.6538	9760034	http://genome.ucsc.edu/cgi-bin/hgTracks?db=hg19&position=chr2:177925496-187785529&hgsid=443362677_4V80BwZqd7j9QbFDPX1nAl3yp6cs
2	187760581	190202001	81	-1.185	2441421	http://genome.ucsc.edu/cgi-bin/hgTracks?db=hg19&position=chr2:187710581-190252001&hgsid=443362677_4V80BwZqd7j9QbFDPX1nAl3yp6cs
2	190261324	197759450	238	-0.3263	7498127	http://genome.ucsc.edu/cgi-bin/hgTracks?db=hg19&position=chr2:190211324-197809450&hgsid=443362677_4V80BwZqd7j9QbFDPX1nAl3yp6cs
2	197768209	198143173	18	-1.3598	374965	http://genome.ucsc.edu/cgi-bin/hgTracks?db=hg19&position=chr2:197718209-198193173&hgsid=443362677_4V80BwZqd7j9QbFDPX1nAl3yp6cs
2	198152668	198431625	38	-0.1461	278958	http://genome.ucsc.edu/cgi-bin/hgTracks?db=hg19&position=chr2:198102668-198481625&hgsid=443362677_4V80BwZqd7j9QbFDPX1nAl3yp6cs
2	198463768	199329675	22	-1.4001	865908	http://genome.ucsc.edu/cgi-bin/hgTracks?db=hg19&position=chr2:198413768-199379675&hgsid=443362677_4V80BwZqd7j9QbFDPX1nAl3yp6cs
2	199332491	200351153	19	-0.0987	1018663	http://genome.ucsc.edu/cgi-bin/hgTracks?db=hg19&position=chr2:199282491-200401153&hgsid=443362677_4V80BwZqd7j9QbFDPX1nAl3yp6cs
2	200355648	200741471	20	-1.3556	385824	http://genome.ucsc.edu/cgi-bin/hgTracks?db=hg19&position=chr2:200305648-200791471&hgsid=443362677_4V80BwZqd7j9QbFDPX1nAl3yp6cs
2	200772744	204851706	361	-0.1647	4078963	http://genome.ucsc.edu/cgi-bin/hgTracks?db=hg19&position=chr2:200722744-204901706&hgsid=443362677_4V80BwZqd7j9QbFDPX1nAl3yp6cs
2	204855125	205205270	16	-1.5124	350146	http://genome.ucsc.edu/cgi-bin/hgTracks?db=hg19&position=chr2:204805125-205255270&hgsid=443362677_4V80BwZqd7j9QbFDPX1nAl3yp6cs
2	205222796	207135386	95	-0.0792	1912591	http://genome.ucsc.edu/cgi-bin/hgTracks?db=hg19&position=chr2:205172796-207185386&hgsid=443362677_4V80BwZqd7j9QbFDPX1nAl3yp6cs
2	207177231	208188030	26	-1.3593	1010800	http://genome.ucsc.edu/cgi-bin/hgTracks?db=hg19&position=chr2:207127231-208238030&hgsid=443362677_4V80BwZqd7j9QbFDPX1nAl3yp6cs
2	208294693	209149912	75	-0.1618	855220	http://genome.ucsc.edu/cgi-bin/hgTracks?db=hg19&position=chr2:208244693-209199912&hgsid=443362677_4V80BwZqd7j9QbFDPX1nAl3yp6cs
2	209293734	216738441	253	-1.1591	7444708	http://genome.ucsc.edu/cgi-bin/hgTracks?db=hg19&position=chr2:209243734-216788441&hgsid=443362677_4V80BwZqd7j9QbFDPX1nAl3yp6cs
2	216801798	228712503	585	-0.5076	11910706	http://genome.ucsc.edu/cgi-bin/hgTracks?db=hg19&position=chr2:216751798-228762503&hgsid=443362677_4V80BwZqd7j9QbFDPX1nAl3yp6cs
2	228801572	229937228	31	-1.4978	1135657	http://genome.ucsc.edu/cgi-bin/hgTracks?db=hg19&position=chr2:228751572-229987228&hgsid=443362677_4V80BwZqd7j9QbFDPX1nAl3yp6cs
2	229970719	243062779	688	-0.2717	13092061	http://genome.ucsc.edu/cgi-bin/hgTracks?db=hg19&position=chr2:229920719-243112779&hgsid=443362677_4V80BwZqd7j9QbFDPX1nAl3yp6cs
3	81317	3153827	105	-1.3268	3072511	http://genome.ucsc.edu/cgi-bin/hgTracks?db=hg19&position=chr3:31317-3203827&hgsid=443362677_4V80BwZqd7j9QbFDPX1nAl3yp6cs
3	3163386	6357907	93	-0.6508	3194522	http://genome.ucsc.edu/cgi-bin/hgTracks?db=hg19&position=chr3:3113386-6407907&hgsid=443362677_4V80BwZqd7j9QbFDPX1nAl3yp6cs
3	6365434	7294468	36	-1.7093	929035	http://genome.ucsc.edu/cgi-bin/hgTracks?db=hg19&position=chr3:6315434-7344468&hgsid=443362677_4V80BwZqd7j9QbFDPX1nAl3yp6cs
3	7313170	7690849	14	-0.3131	377680	http://genome.ucsc.edu/cgi-bin/hgTracks?db=hg19&position=chr3:7263170-7740849&hgsid=443362677_4V80BwZqd7j9QbFDPX1nAl3yp6cs
3	7706951	8320726	14	-1.5922	613776	http://genome.ucsc.edu/cgi-bin/hgTracks?db=hg19&position=chr3:7656951-8370726&hgsid=443362677_4V80BwZqd7j9QbFDPX1nAl3yp6cs
3	8463984	20030748	539	-0.3403	11566765	http://genome.ucsc.edu/cgi-bin/hgTracks?db=hg19&position=chr3:8413984-20080748&hgsid=443362677_4V80BwZqd7j9QbFDPX1nAl3yp6cs
3	20047329	22763507	54	-1.1828	2716179	http://genome.ucsc.edu/cgi-bin/hgTracks?db=hg19&position=chr3:19997329-22813507&hgsid=443362677_4V80BwZqd7j9QbFDPX1nAl3yp6cs
3	22786364	24819630	70	-0.3411	2033267	http://genome.ucsc.edu/cgi-bin/hgTracks?db=hg19&position=chr3:22736364-24869630&hgsid=443362677_4V80BwZqd7j9QbFDPX1nAl3yp6cs
3	24897335	27325801	60	-1.1017	2428467	http://genome.ucsc.edu/cgi-bin/hgTracks?db=hg19&position=chr3:24847335-27375801&hgsid=443362677_4V80BwZqd7j9QbFDPX1nAl3yp6cs
3	27359386	27711775	34	-0.3275	352390	http://genome.ucsc.edu/cgi-bin/hgTracks?db=hg19&position=chr3:27309386-27761775&hgsid=443362677_4V80BwZqd7j9QbFDPX1nAl3yp6cs
3	27723726	29834646	64	-1.3305	2110921	http://genome.ucsc.edu/cgi-bin/hgTracks?db=hg19&position=chr3:27673726-29884646&hgsid=443362677_4V80BwZqd7j9QbFDPX1nAl3yp6cs
3	29836001	35113905	237	-0.4316	5277905	http://genome.ucsc.edu/cgi-bin/hgTracks?db=hg19&position=chr3:29786001-35163905&hgsid=443362677_4V80BwZqd7j9QbFDPX1nAl3yp6cs
3	35124160	36406977	20	-1.6519	1282818	http://genome.ucsc.edu/cgi-bin/hgTracks?db=hg19&position=chr3:35074160-36456977&hgsid=443362677_4V80BwZqd7j9QbFDPX1nAl3yp6cs
3	36680501	53954686	1144	-0.281	17274186	http://genome.ucsc.edu/cgi-bin/hgTracks?db=hg19&position=chr3:36630501-54004686&hgsid=443362677_4V80BwZqd7j9QbFDPX1nAl3yp6cs
3	53966894	56585653	78	-1.3549	2618760	http://genome.ucsc.edu/cgi-bin/hgTracks?db=hg19&position=chr3:53916894-56635653&hgsid=443362677_4V80BwZqd7j9QbFDPX1nAl3yp6cs
3	56599394	58925277	208	-0.2544	2325884	http://genome.ucsc.edu/cgi-bin/hgTracks?db=hg19&position=chr3:56549394-58975277&hgsid=443362677_4V80BwZqd7j9QbFDPX1nAl3yp6cs
3	58926979	61527152	78	-1.4134	2600174	http://genome.ucsc.edu/cgi-bin/hgTracks?db=hg19&position=chr3:58876979-61577152&hgsid=443362677_4V80BwZqd7j9QbFDPX1nAl3yp6cs
3	61539692	64913939	96	-0.3166	3374248	http://genome.ucsc.edu/cgi-bin/hgTracks?db=hg19&position=chr3:61489692-64963939&hgsid=443362677_4V80BwZqd7j9QbFDPX1nAl3yp6cs
3	64946579	65291177	13	-2.0272	344599	http://genome.ucsc.edu/cgi-bin/hgTracks?db=hg19&position=chr3:64896579-65341177&hgsid=443362677_4V80BwZqd7j9QbFDPX1nAl3yp6cs
3	65360956	73043496	291	-0.566	7682541	http://genome.ucsc.edu/cgi-bin/hgTracks?db=hg19&position=chr3:65310956-73093496&hgsid=443362677_4V80BwZqd7j9QbFDPX1nAl3yp6cs
3	73056718	86988699	406	-1.1593	13931982	http://genome.ucsc.edu/cgi-bin/hgTracks?db=hg19&position=chr3:73006718-87038699&hgsid=443362677_4V80BwZqd7j9QbFDPX1nAl3yp6cs
3	86998901	88643234	47	-0.301	1644334	http://genome.ucsc.edu/cgi-bin/hgTracks?db=hg19&position=chr3:86948901-88693234&hgsid=443362677_4V80BwZqd7j9QbFDPX1nAl3yp6cs
3	88679188	90281211	31	-1.1303	1602024	http://genome.ucsc.edu/cgi-bin/hgTracks?db=hg19&position=chr3:88629188-90331211&hgsid=443362677_4V80BwZqd7j9QbFDPX1nAl3yp6cs
3	93530026	97495593	101	-1.1127	3965568	http://genome.ucsc.edu/cgi-bin/hgTracks?db=hg19&position=chr3:93480026-97545593&hgsid=443362677_4V80BwZqd7j9QbFDPX1nAl3yp6cs
3	97676264	101903677	132	-0.3846	4227414	http://genome.ucsc.edu/cgi-bin/hgTracks?db=hg19&position=chr3:97626264-101953677&hgsid=443362677_4V80BwZqd7j9QbFDPX1nAl3yp6cs
3	101972295	105043548	67	-1.2367	3071254	http://genome.ucsc.edu/cgi-bin/hgTracks?db=hg19&position=chr3:101922295-105093548&hgsid=443362677_4V80BwZqd7j9QbFDPX1nAl3yp6cs
3	105061581	106273350	45	-0.12	1211770	http://genome.ucsc.edu/cgi-bin/hgTracks?db=hg19&position=chr3:105011581-106323350&hgsid=443362677_4V80BwZqd7j9QbFDPX1nAl3yp6cs
3	106307520	106918471	25	-1.5439	610952	http://genome.ucsc.edu/cgi-bin/hgTracks?db=hg19&position=chr3:106257520-106968471&hgsid=443362677_4V80BwZqd7j9QbFDPX1nAl3yp6cs
3	106919494	109077308	89	-0.2409	2157815	http://genome.ucsc.edu/cgi-bin/hgTracks?db=hg19&position=chr3:106869494-109127308&hgsid=443362677_4V80BwZqd7j9QbFDPX1nAl3yp6cs
3	109080910	109343685	23	-1.5619	262776	http://genome.ucsc.edu/cgi-bin/hgTracks?db=hg19&position=chr3:109030910-109393685&hgsid=443362677_4V80BwZqd7j9QbFDPX1nAl3yp6cs
3	109347270	116209062	218	-0.4632	6861793	http://genome.ucsc.edu/cgi-bin/hgTracks?db=hg19&position=chr3:109297270-116259062&hgsid=443362677_4V80BwZqd7j9QbFDPX1nAl3yp6cs
3	116239711	118821937	45	-1.4394	2582227	http://genome.ucsc.edu/cgi-bin/hgTracks?db=hg19&position=chr3:116189711-118871937&hgsid=443362677_4V80BwZqd7j9QbFDPX1nAl3yp6cs
3	118843206	134271138	629	-0.3799	15427933	http://genome.ucsc.edu/cgi-bin/hgTracks?db=hg19&position=chr3:118793206-134321138&hgsid=443362677_4V80BwZqd7j9QbFDPX1nAl3yp6cs
3	134300610	135718708	24	-1.6358	1418099	http://genome.ucsc.edu/cgi-bin/hgTracks?db=hg19&position=chr3:134250610-135768708&hgsid=443362677_4V80BwZqd7j9QbFDPX1nAl3yp6cs
3	135729361	136770715	93	-0.0451	1041355	http://genome.ucsc.edu/cgi-bin/hgTracks?db=hg19&position=chr3:135679361-136820715&hgsid=443362677_4V80BwZqd7j9QbFDPX1nAl3yp6cs
3	136839954	137696729	15	-1.8113	856776	http://genome.ucsc.edu/cgi-bin/hgTracks?db=hg19&position=chr3:136789954-137746729&hgsid=443362677_4V80BwZqd7j9QbFDPX1nAl3yp6cs
3	137737271	143957207	308	-0.4013	6219937	http://genome.ucsc.edu/cgi-bin/hgTracks?db=hg19&position=chr3:137687271-144007207&hgsid=443362677_4V80BwZqd7j9QbFDPX1nAl3yp6cs
3	144082574	148040406	99	-1.3285	3957833	http://genome.ucsc.edu/cgi-bin/hgTracks?db=hg19&position=chr3:144032574-148090406&hgsid=443362677_4V80BwZqd7j9QbFDPX1nAl3yp6cs
3	148143176	156918284	359	-0.408	8775109	http://genome.ucsc.edu/cgi-bin/hgTracks?db=hg19&position=chr3:148093176-156968284&hgsid=443362677_4V80BwZqd7j9QbFDPX1nAl3yp6cs
3	156931672	157716047	19	-1.8745	784376	http://genome.ucsc.edu/cgi-bin/hgTracks?db=hg19&position=chr3:156881672-157766047&hgsid=443362677_4V80BwZqd7j9QbFDPX1nAl3yp6cs
3	157778460	158883495	35	-0.3713	1105036	http://genome.ucsc.edu/cgi-bin/hgTracks?db=hg19&position=chr3:157728460-158933495&hgsid=443362677_4V80BwZqd7j9QbFDPX1nAl3yp6cs
3	158912824	159274839	10	-1.9678	362016	http://genome.ucsc.edu/cgi-bin/hgTracks?db=hg19&position=chr3:158862824-159324839&hgsid=443362677_4V80BwZqd7j9QbFDPX1nAl3yp6cs
3	159340631	161197120	78	-0.2718	1856490	http://genome.ucsc.edu/cgi-bin/hgTracks?db=hg19&position=chr3:159290631-161247120&hgsid=443362677_4V80BwZqd7j9QbFDPX1nAl3yp6cs
3	161246934	167377285	125	-1.2098	6130352	http://genome.ucsc.edu/cgi-bin/hgTracks?db=hg19&position=chr3:161196934-167427285&hgsid=443362677_4V80BwZqd7j9QbFDPX1nAl3yp6cs
3	167388397	167911619	14	0	523223	http://genome.ucsc.edu/cgi-bin/hgTracks?db=hg19&position=chr3:167338397-167961619&hgsid=443362677_4V80BwZqd7j9QbFDPX1nAl3yp6cs
3	167953548	168559090	16	-1.2346	605543	http://genome.ucsc.edu/cgi-bin/hgTracks?db=hg19&position=chr3:167903548-168609090&hgsid=443362677_4V80BwZqd7j9QbFDPX1nAl3yp6cs
3	168570446	172640686	229	-0.1469	4070241	http://genome.ucsc.edu/cgi-bin/hgTracks?db=hg19&position=chr3:168520446-172690686&hgsid=443362677_4V80BwZqd7j9QbFDPX1nAl3yp6cs
3	172658697	174018937	45	-1.4169	1360241	http://genome.ucsc.edu/cgi-bin/hgTracks?db=hg19&position=chr3:172608697-174068937&hgsid=443362677_4V80BwZqd7j9QbFDPX1nAl3yp6cs
3	174185307	175307924	50	0.0185	1122618	http://genome.ucsc.edu/cgi-bin/hgTracks?db=hg19&position=chr3:174135307-175357924&hgsid=443362677_4V80BwZqd7j9QbFDPX1nAl3yp6cs
3	175322184	176787451	42	-1.159	1465268	http://genome.ucsc.edu/cgi-bin/hgTracks?db=hg19&position=chr3:175272184-176837451&hgsid=443362677_4V80BwZqd7j9QbFDPX1nAl3yp6cs
3	176796661	179547657	178	-0.4326	2750997	http://genome.ucsc.edu/cgi-bin/hgTracks?db=hg19&position=chr3:176746661-179597657&hgsid=443362677_4V80BwZqd7j9QbFDPX1nAl3yp6cs
3	179562542	181527118	78	-1.2364	1964577	http://genome.ucsc.edu/cgi-bin/hgTracks?db=hg19&position=chr3:179512542-181577118&hgsid=443362677_4V80BwZqd7j9QbFDPX1nAl3yp6cs
3	181528408	190468850	603	-0.2991	8940443	http://genome.ucsc.edu/cgi-bin/hgTracks?db=hg19&position=chr3:181478408-190518850&hgsid=443362677_4V80BwZqd7j9QbFDPX1nAl3yp6cs
3	190471189	192420505	69	-1.2827	1949317	http://genome.ucsc.edu/cgi-bin/hgTracks?db=hg19&position=chr3:190421189-192470505&hgsid=443362677_4V80BwZqd7j9QbFDPX1nAl3yp6cs
3	192432400	197887341	480	-0.2737	5454942	http://genome.ucsc.edu/cgi-bin/hgTracks?db=hg19&position=chr3:192382400-197937341&hgsid=443362677_4V80BwZqd7j9QbFDPX1nAl3yp6cs
4	50401	16647084	671	-0.4703	16596684	http://genome.ucsc.edu/cgi-bin/hgTracks?db=hg19&position=chr4:401-16697084&hgsid=443362677_4V80BwZqd7j9QbFDPX1nAl3yp6cs
4	16657615	17316128	29	-1.4663	658514	http://genome.ucsc.edu/cgi-bin/hgTracks?db=hg19&position=chr4:16607615-17366128&hgsid=443362677_4V80BwZqd7j9QbFDPX1nAl3yp6cs
4	17347675	18015523	45	-0.4503	667849	http://genome.ucsc.edu/cgi-bin/hgTracks?db=hg19&position=chr4:17297675-18065523&hgsid=443362677_4V80BwZqd7j9QbFDPX1nAl3yp6cs
4	18034514	21717952	98	-1.3804	3683439	http://genome.ucsc.edu/cgi-bin/hgTracks?db=hg19&position=chr4:17984514-21767952&hgsid=443362677_4V80BwZqd7j9QbFDPX1nAl3yp6cs
4	21788283	27173871	207	-0.42	5385589	http://genome.ucsc.edu/cgi-bin/hgTracks?db=hg19&position=chr4:21738283-27223871&hgsid=443362677_4V80BwZqd7j9QbFDPX1nAl3yp6cs
4	27190973	35852735	232	-1.3244	8661763	http://genome.ucsc.edu/cgi-bin/hgTracks?db=hg19&position=chr4:27140973-35902735&hgsid=443362677_4V80BwZqd7j9QbFDPX1nAl3yp6cs
4	35996152	36310998	9	0	314847	http://genome.ucsc.edu/cgi-bin/hgTracks?db=hg19&position=chr4:35946152-36360998&hgsid=443362677_4V80BwZqd7j9QbFDPX1nAl3yp6cs
4	36333731	37468644	30	-1.1102	1134914	http://genome.ucsc.edu/cgi-bin/hgTracks?db=hg19&position=chr4:36283731-37518644&hgsid=443362677_4V80BwZqd7j9QbFDPX1nAl3yp6cs
4	37482039	42774651	422	-0.2254	5292613	http://genome.ucsc.edu/cgi-bin/hgTracks?db=hg19&position=chr4:37432039-42824651&hgsid=443362677_4V80BwZqd7j9QbFDPX1nAl3yp6cs
4	42801547	47418560	96	-1.3729	4617014	http://genome.ucsc.edu/cgi-bin/hgTracks?db=hg19&position=chr4:42751547-47468560&hgsid=443362677_4V80BwZqd7j9QbFDPX1nAl3yp6cs
4	47458188	49619217	75	-0.5033	2161030	http://genome.ucsc.edu/cgi-bin/hgTracks?db=hg19&position=chr4:47408188-49669217&hgsid=443362677_4V80BwZqd7j9QbFDPX1nAl3yp6cs
4	52747218	57880761	236	-0.3678	5133544	http://genome.ucsc.edu/cgi-bin/hgTracks?db=hg19&position=chr4:52697218-57930761&hgsid=443362677_4V80BwZqd7j9QbFDPX1nAl3yp6cs
4	57905156	67826209	224	-1.2751	9921054	http://genome.ucsc.edu/cgi-bin/hgTracks?db=hg19&position=chr4:57855156-67876209&hgsid=443362677_4V80BwZqd7j9QbFDPX1nAl3yp6cs
4	67861649	71926470	161	-0.4653	4064822	http://genome.ucsc.edu/cgi-bin/hgTracks?db=hg19&position=chr4:67811649-71976470&hgsid=443362677_4V80BwZqd7j9QbFDPX1nAl3yp6cs
4	71982584	73852623	39	-1.1644	1870040	http://genome.ucsc.edu/cgi-bin/hgTracks?db=hg19&position=chr4:71932584-73902623&hgsid=443362677_4V80BwZqd7j9QbFDPX1nAl3yp6cs
4	73880619	84538098	425	-0.3062	10657480	http://genome.ucsc.edu/cgi-bin/hgTracks?db=hg19&position=chr4:73830619-84588098&hgsid=443362677_4V80BwZqd7j9QbFDPX1nAl3yp6cs
4	84570050	85265362	14	-1.5834	695313	http://genome.ucsc.edu/cgi-bin/hgTracks?db=hg19&position=chr4:84520050-85315362&hgsid=443362677_4V80BwZqd7j9QbFDPX1nAl3yp6cs
4	85403667	85932802	23	0.0435	529136	http://genome.ucsc.edu/cgi-bin/hgTracks?db=hg19&position=chr4:85353667-85982802&hgsid=443362677_4V80BwZqd7j9QbFDPX1nAl3yp6cs
4	85947954	86692955	23	-1.7906	745002	http://genome.ucsc.edu/cgi-bin/hgTracks?db=hg19&position=chr4:85897954-86742955&hgsid=443362677_4V80BwZqd7j9QbFDPX1nAl3yp6cs
4	86718418	93332949	239	-0.349	6614532	http://genome.ucsc.edu/cgi-bin/hgTracks?db=hg19&position=chr4:86668418-93382949&hgsid=443362677_4V80BwZqd7j9QbFDPX1nAl3yp6cs
4	93349337	99144451	169	-0.948	5795115	http://genome.ucsc.edu/cgi-bin/hgTracks?db=hg19&position=chr4:93299337-99194451&hgsid=443362677_4V80BwZqd7j9QbFDPX1nAl3yp6cs
4	99151913	109719874	320	-0.3597	10567962	http://genome.ucsc.edu/cgi-bin/hgTracks?db=hg19&position=chr4:99101913-109769874&hgsid=443362677_4V80BwZqd7j9QbFDPX1nAl3yp6cs
4	109721470	110281833	20	-1.4124	560364	http://genome.ucsc.edu/cgi-bin/hgTracks?db=hg19&position=chr4:109671470-110331833&hgsid=443362677_4V80BwZqd7j9QbFDPX1nAl3yp6cs
4	110325342	111126153	55	0.0226	800812	http://genome.ucsc.edu/cgi-bin/hgTracks?db=hg19&position=chr4:110275342-111176153&hgsid=443362677_4V80BwZqd7j9QbFDPX1nAl3yp6cs
4	111129952	113059317	57	-0.9169	1929366	http://genome.ucsc.edu/cgi-bin/hgTracks?db=hg19&position=chr4:111079952-113109317&hgsid=443362677_4V80BwZqd7j9QbFDPX1nAl3yp6cs
4	113064507	113591714	29	0.0018	527208	http://genome.ucsc.edu/cgi-bin/hgTracks?db=hg19&position=chr4:113014507-113641714&hgsid=443362677_4V80BwZqd7j9QbFDPX1nAl3yp6cs
4	113593664	114242981	58	-1.0316	649318	http://genome.ucsc.edu/cgi-bin/hgTracks?db=hg19&position=chr4:113543664-114292981&hgsid=443362677_4V80BwZqd7j9QbFDPX1nAl3yp6cs
4	114263780	115645125	41	-0.2701	1381346	http://genome.ucsc.edu/cgi-bin/hgTracks?db=hg19&position=chr4:114213780-115695125&hgsid=443362677_4V80BwZqd7j9QbFDPX1nAl3yp6cs
4	115752301	119148859	87	-1.256	3396559	http://genome.ucsc.edu/cgi-bin/hgTracks?db=hg19&position=chr4:115702301-119198859&hgsid=443362677_4V80BwZqd7j9QbFDPX1nAl3yp6cs
4	119172374	120789802	72	-0.3757	1617429	http://genome.ucsc.edu/cgi-bin/hgTracks?db=hg19&position=chr4:119122374-120839802&hgsid=443362677_4V80BwZqd7j9QbFDPX1nAl3yp6cs
4	120791605	123069575	71	-1.2044	2277971	http://genome.ucsc.edu/cgi-bin/hgTracks?db=hg19&position=chr4:120741605-123119575&hgsid=443362677_4V80BwZqd7j9QbFDPX1nAl3yp6cs
4	123075423	125580392	86	-0.2329	2504970	http://genome.ucsc.edu/cgi-bin/hgTracks?db=hg19&position=chr4:123025423-125630392&hgsid=443362677_4V80BwZqd7j9QbFDPX1nAl3yp6cs
4	125603395	128491232	71	-1.3684	2887838	http://genome.ucsc.edu/cgi-bin/hgTracks?db=hg19&position=chr4:125553395-128541232&hgsid=443362677_4V80BwZqd7j9QbFDPX1nAl3yp6cs
4	128566808	130201798	109	-0.2371	1634991	http://genome.ucsc.edu/cgi-bin/hgTracks?db=hg19&position=chr4:128516808-130251798&hgsid=443362677_4V80BwZqd7j9QbFDPX1nAl3yp6cs
4	130231140	138916820	183	-1.358	8685681	http://genome.ucsc.edu/cgi-bin/hgTracks?db=hg19&position=chr4:130181140-138966820&hgsid=443362677_4V80BwZqd7j9QbFDPX1nAl3yp6cs
4	138932311	154637140	580	-0.3287	15704830	http://genome.ucsc.edu/cgi-bin/hgTracks?db=hg19&position=chr4:138882311-154687140&hgsid=443362677_4V80BwZqd7j9QbFDPX1nAl3yp6cs
4	154665498	159554246	123	-1.2109	4888749	http://genome.ucsc.edu/cgi-bin/hgTracks?db=hg19&position=chr4:154615498-159604246&hgsid=443362677_4V80BwZqd7j9QbFDPX1nAl3yp6cs
4	159591268	160366690	50	-0.1374	775423	http://genome.ucsc.edu/cgi-bin/hgTracks?db=hg19&position=chr4:159541268-160416690&hgsid=443362677_4V80BwZqd7j9QbFDPX1nAl3yp6cs
4	160378571	168978170	278	-1.2148	8599600	http://genome.ucsc.edu/cgi-bin/hgTracks?db=hg19&position=chr4:160328571-169028170&hgsid=443362677_4V80BwZqd7j9QbFDPX1nAl3yp6cs
4	169014752	171094438	103	-0.1126	2079687	http://genome.ucsc.edu/cgi-bin/hgTracks?db=hg19&position=chr4:168964752-171144438&hgsid=443362677_4V80BwZqd7j9QbFDPX1nAl3yp6cs
4	171154438	174990219	98	-1.2314	3835782	http://genome.ucsc.edu/cgi-bin/hgTracks?db=hg19&position=chr4:171104438-175040219&hgsid=443362677_4V80BwZqd7j9QbFDPX1nAl3yp6cs
4	175102457	176159324	31	-0.097	1056868	http://genome.ucsc.edu/cgi-bin/hgTracks?db=hg19&position=chr4:175052457-176209324&hgsid=443362677_4V80BwZqd7j9QbFDPX1nAl3yp6cs
4	176204078	183698803	293	-1.2529	7494726	http://genome.ucsc.edu/cgi-bin/hgTracks?db=hg19&position=chr4:176154078-183748803&hgsid=443362677_4V80BwZqd7j9QbFDPX1nAl3yp6cs
4	183742835	189028261	347	-0.5494	5285427	http://genome.ucsc.edu/cgi-bin/hgTracks?db=hg19&position=chr4:183692835-189078261&hgsid=443362677_4V80BwZqd7j9QbFDPX1nAl3yp6cs
4	189036795	190974285	115	-1.3299	1937491	http://genome.ucsc.edu/cgi-bin/hgTracks?db=hg19&position=chr4:188986795-191024285&hgsid=443362677_4V80BwZqd7j9QbFDPX1nAl3yp6cs
5	28689	17267720	545	-0.5927	17239032	http://genome.ucsc.edu/cgi-bin/hgTracks?db=hg19&position=chr5:-21311-17317720&hgsid=443362677_4V80BwZqd7j9QbFDPX1nAl3yp6cs
5	17295428	32098288	518	-0.9178	14802861	http://genome.ucsc.edu/cgi-bin/hgTracks?db=hg19&position=chr5:17245428-32148288&hgsid=443362677_4V80BwZqd7j9QbFDPX1nAl3yp6cs
5	32119333	46164323	518	-0.4805	14044991	http://genome.ucsc.edu/cgi-bin/hgTracks?db=hg19&position=chr5:32069333-46214323&hgsid=443362677_4V80BwZqd7j9QbFDPX1nAl3yp6cs
5	49486520	61926990	463	-0.3084	12440471	http://genome.ucsc.edu/cgi-bin/hgTracks?db=hg19&position=chr5:49436520-61976990&hgsid=443362677_4V80BwZqd7j9QbFDPX1nAl3yp6cs
5	61927533	63824562	47	-0.9462	1897030	http://genome.ucsc.edu/cgi-bin/hgTracks?db=hg19&position=chr5:61877533-63874562&hgsid=443362677_4V80BwZqd7j9QbFDPX1nAl3yp6cs
5	63969459	74999904	458	-0.1131	11030446	http://genome.ucsc.edu/cgi-bin/hgTracks?db=hg19&position=chr5:63919459-75049904&hgsid=443362677_4V80BwZqd7j9QbFDPX1nAl3yp6cs
5	75011059	75147558	9	-1.7929	136500	http://genome.ucsc.edu/cgi-bin/hgTracks?db=hg19&position=chr5:74961059-75197558&hgsid=443362677_4V80BwZqd7j9QbFDPX1nAl3yp6cs
5	75297351	82605022	371	-0.2048	7307672	http://genome.ucsc.edu/cgi-bin/hgTracks?db=hg19&position=chr5:75247351-82655022&hgsid=443362677_4V80BwZqd7j9QbFDPX1nAl3yp6cs
5	82605507	87324213	113	-0.8968	4718707	http://genome.ucsc.edu/cgi-bin/hgTracks?db=hg19&position=chr5:82555507-87374213&hgsid=443362677_4V80BwZqd7j9QbFDPX1nAl3yp6cs
5	87335721	110458731	599	-0.4315	23123011	http://genome.ucsc.edu/cgi-bin/hgTracks?db=hg19&position=chr5:87285721-110508731&hgsid=443362677_4V80BwZqd7j9QbFDPX1nAl3yp6cs
5	110518190	111317701	18	-1.2921	799512	http://genome.ucsc.edu/cgi-bin/hgTracks?db=hg19&position=chr5:110468190-111367701&hgsid=443362677_4V80BwZqd7j9QbFDPX1nAl3yp6cs
5	111377704	112670380	52	-0.0914	1292677	http://genome.ucsc.edu/cgi-bin/hgTracks?db=hg19&position=chr5:111327704-112720380&hgsid=443362677_4V80BwZqd7j9QbFDPX1nAl3yp6cs
5	112720209	112735912	3	-2.0256	15704	http://genome.ucsc.edu/cgi-bin/hgTracks?db=hg19&position=chr5:112670209-112785912&hgsid=443362677_4V80BwZqd7j9QbFDPX1nAl3yp6cs
5	112739656	112897258	8	0	157603	http://genome.ucsc.edu/cgi-bin/hgTracks?db=hg19&position=chr5:112689656-112947258&hgsid=443362677_4V80BwZqd7j9QbFDPX1nAl3yp6cs
5	113023928	113538376	15	-1.8483	514449	http://genome.ucsc.edu/cgi-bin/hgTracks?db=hg19&position=chr5:112973928-113588376&hgsid=443362677_4V80BwZqd7j9QbFDPX1nAl3yp6cs
5	113568710	128804139	456	-0.4577	15235430	http://genome.ucsc.edu/cgi-bin/hgTracks?db=hg19&position=chr5:113518710-128854139&hgsid=443362677_4V80BwZqd7j9QbFDPX1nAl3yp6cs
5	128897146	129981444	37	-1.0994	1084299	http://genome.ucsc.edu/cgi-bin/hgTracks?db=hg19&position=chr5:128847146-130031444&hgsid=443362677_4V80BwZqd7j9QbFDPX1nAl3yp6cs
5	130098685	132753575	162	-0.1365	2654891	http://genome.ucsc.edu/cgi-bin/hgTracks?db=hg19&position=chr5:130048685-132803575&hgsid=443362677_4V80BwZqd7j9QbFDPX1nAl3yp6cs
5	132908859	133239302	10	-1.5721	330444	http://genome.ucsc.edu/cgi-bin/hgTracks?db=hg19&position=chr5:132858859-133289302&hgsid=443362677_4V80BwZqd7j9QbFDPX1nAl3yp6cs
5	133247893	135532570	174	-0.05	2284678	http://genome.ucsc.edu/cgi-bin/hgTracks?db=hg19&position=chr5:133197893-135582570&hgsid=443362677_4V80BwZqd7j9QbFDPX1nAl3yp6cs
5	135671516	137199416	40	-1.09	1527901	http://genome.ucsc.edu/cgi-bin/hgTracks?db=hg19&position=chr5:135621516-137249416&hgsid=443362677_4V80BwZqd7j9QbFDPX1nAl3yp6cs
5	137210080	142935586	478	-0.1416	5725507	http://genome.ucsc.edu/cgi-bin/hgTracks?db=hg19&position=chr5:137160080-142985586&hgsid=443362677_4V80BwZqd7j9QbFDPX1nAl3yp6cs
5	142935855	144560881	46	-1.0582	1625027	http://genome.ucsc.edu/cgi-bin/hgTracks?db=hg19&position=chr5:142885855-144610881&hgsid=443362677_4V80BwZqd7j9QbFDPX1nAl3yp6cs
5	144597250	145912642	54	-0.0455	1315393	http://genome.ucsc.edu/cgi-bin/hgTracks?db=hg19&position=chr5:144547250-145962642&hgsid=443362677_4V80BwZqd7j9QbFDPX1nAl3yp6cs
5	145914698	147205097	34	-0.8504	1290400	http://genome.ucsc.edu/cgi-bin/hgTracks?db=hg19&position=chr5:145864698-147255097&hgsid=443362677_4V80BwZqd7j9QbFDPX1nAl3yp6cs
5	147301567	150315400	146	-0.1699	3013834	http://genome.ucsc.edu/cgi-bin/hgTracks?db=hg19&position=chr5:147251567-150365400&hgsid=443362677_4V80BwZqd7j9QbFDPX1nAl3yp6cs
5	150336735	153299650	78	-0.9197	2962916	http://genome.ucsc.edu/cgi-bin/hgTracks?db=hg19&position=chr5:150286735-153349650&hgsid=443362677_4V80BwZqd7j9QbFDPX1nAl3yp6cs
5	153310912	154373529	75	-0.1967	1062618	http://genome.ucsc.edu/cgi-bin/hgTracks?db=hg19&position=chr5:153260912-154423529&hgsid=443362677_4V80BwZqd7j9QbFDPX1nAl3yp6cs
5	154376575	156743022	73	-1.0895	2366448	http://genome.ucsc.edu/cgi-bin/hgTracks?db=hg19&position=chr5:154326575-156793022&hgsid=443362677_4V80BwZqd7j9QbFDPX1nAl3yp6cs
5	156754497	157633778	48	-0.1784	879282	http://genome.ucsc.edu/cgi-bin/hgTracks?db=hg19&position=chr5:156704497-157683778&hgsid=443362677_4V80BwZqd7j9QbFDPX1nAl3yp6cs
5	157649456	158266483	13	-1.5358	617028	http://genome.ucsc.edu/cgi-bin/hgTracks?db=hg19&position=chr5:157599456-158316483&hgsid=443362677_4V80BwZqd7j9QbFDPX1nAl3yp6cs
5	158267772	160588782	94	-0.2545	2321011	http://genome.ucsc.edu/cgi-bin/hgTracks?db=hg19&position=chr5:158217772-160638782&hgsid=443362677_4V80BwZqd7j9QbFDPX1nAl3yp6cs
5	160590721	167087394	239	-0.8535	6496674	http://genome.ucsc.edu/cgi-bin/hgTracks?db=hg19&position=chr5:160540721-167137394&hgsid=443362677_4V80BwZqd7j9QbFDPX1nAl3yp6cs
5	167133944	168400345	56	-0.0813	1266402	http://genome.ucsc.edu/cgi-bin/hgTracks?db=hg19&position=chr5:167083944-168450345&hgsid=443362677_4V80BwZqd7j9QbFDPX1nAl3yp6cs
5	168460910	170802206	80	-1.4725	2341297	http://genome.ucsc.edu/cgi-bin/hgTracks?db=hg19&position=chr5:168410910-170852206&hgsid=443362677_4V80BwZqd7j9QbFDPX1nAl3yp6cs
5	170806897	176987515	455	-0.3685	6180619	http://genome.ucsc.edu/cgi-bin/hgTracks?db=hg19&position=chr5:170756897-177037515&hgsid=443362677_4V80BwZqd7j9QbFDPX1nAl3yp6cs
5	176987978	178917698	171	-1.0226	1929721	http://genome.ucsc.edu/cgi-bin/hgTracks?db=hg19&position=chr5:176937978-178967698&hgsid=443362677_4V80BwZqd7j9QbFDPX1nAl3yp6cs
5	178935181	180706713	212	-0.4404	1771533	http://genome.ucsc.edu/cgi-bin/hgTracks?db=hg19&position=chr5:178885181-180756713&hgsid=443362677_4V80BwZqd7j9QbFDPX1nAl3yp6cs
6	132520	8538966	394	-0.2235	8406447	http://genome.ucsc.edu/cgi-bin/hgTracks?db=hg19&position=chr6:82520-8588966&hgsid=443362677_4V80BwZqd7j9QbFDPX1nAl3yp6cs
6	8650245	10001416	46	-1.3036	1351172	http://genome.ucsc.edu/cgi-bin/hgTracks?db=hg19&position=chr6:8600245-10051416&hgsid=443362677_4V80BwZqd7j9QbFDPX1nAl3yp6cs
6	10036240	14268003	222	-0.3135	4231764	http://genome.ucsc.edu/cgi-bin/hgTracks?db=hg19&position=chr6:9986240-14318003&hgsid=443362677_4V80BwZqd7j9QbFDPX1nAl3yp6cs
6	14296821	15274252	89	-0.8689	977432	http://genome.ucsc.edu/cgi-bin/hgTracks?db=hg19&position=chr6:14246821-15324252&hgsid=443362677_4V80BwZqd7j9QbFDPX1nAl3yp6cs
6	15278741	18318603	226	-0.1805	3039863	http://genome.ucsc.edu/cgi-bin/hgTracks?db=hg19&position=chr6:15228741-18368603&hgsid=443362677_4V80BwZqd7j9QbFDPX1nAl3yp6cs
6	18338676	19998338	64	-0.8281	1659663	http://genome.ucsc.edu/cgi-bin/hgTracks?db=hg19&position=chr6:18288676-20048338&hgsid=443362677_4V80BwZqd7j9QbFDPX1nAl3yp6cs
6	20052545	22266416	158	-0.2907	2213872	http://genome.ucsc.edu/cgi-bin/hgTracks?db=hg19&position=chr6:20002545-22316416&hgsid=443362677_4V80BwZqd7j9QbFDPX1nAl3yp6cs
6	22266682	24399520	61	-1.1457	2132839	http://genome.ucsc.edu/cgi-bin/hgTracks?db=hg19&position=chr6:22216682-24449520&hgsid=443362677_4V80BwZqd7j9QbFDPX1nAl3yp6cs
6	24419051	28366634	290	-0.1802	3947584	http://genome.ucsc.edu/cgi-bin/hgTracks?db=hg19&position=chr6:24369051-28416634&hgsid=443362677_4V80BwZqd7j9QbFDPX1nAl3yp6cs
6	28379157	33495752	421	-0.9867	5116596	http://genome.ucsc.edu/cgi-bin/hgTracks?db=hg19&position=chr6:28329157-33545752&hgsid=443362677_4V80BwZqd7j9QbFDPX1nAl3yp6cs
6	33510187	39297155	515	-0.21	5786969	http://genome.ucsc.edu/cgi-bin/hgTracks?db=hg19&position=chr6:33460187-39347155&hgsid=443362677_4V80BwZqd7j9QbFDPX1nAl3yp6cs
6	39329259	41414407	48	-0.9935	2085149	http://genome.ucsc.edu/cgi-bin/hgTracks?db=hg19&position=chr6:39279259-41464407&hgsid=443362677_4V80BwZqd7j9QbFDPX1nAl3yp6cs
6	41420423	47729257	416	-0.1781	6308835	http://genome.ucsc.edu/cgi-bin/hgTracks?db=hg19&position=chr6:41370423-47779257&hgsid=443362677_4V80BwZqd7j9QbFDPX1nAl3yp6cs
6	47803365	52259995	120	-0.8299	4456631	http://genome.ucsc.edu/cgi-bin/hgTracks?db=hg19&position=chr6:47753365-52309995&hgsid=443362677_4V80BwZqd7j9QbFDPX1nAl3yp6cs
6	52267086	57239184	177	-0.0648	4972099	http://genome.ucsc.edu/cgi-bin/hgTracks?db=hg19&position=chr6:52217086-57289184&hgsid=443362677_4V80BwZqd7j9QbFDPX1nAl3yp6cs
6	57262850	58674548	41	-0.9288	1411699	http://genome.ucsc.edu/cgi-bin/hgTracks?db=hg19&position=chr6:57212850-58724548&hgsid=443362677_4V80BwZqd7j9QbFDPX1nAl3yp6cs
6	62041228	64304163	63	-1.0194	2262936	http://genome.ucsc.edu/cgi-bin/hgTracks?db=hg19&position=chr6:61991228-64354163&hgsid=443362677_4V80BwZqd7j9QbFDPX1nAl3yp6cs
6	64305304	64537661	11	0.5455	232358	http://genome.ucsc.edu/cgi-bin/hgTracks?db=hg19&position=chr6:64255304-64587661&hgsid=443362677_4V80BwZqd7j9QbFDPX1nAl3yp6cs
6	64561974	74094994	240	-0.9647	9533021	http://genome.ucsc.edu/cgi-bin/hgTracks?db=hg19&position=chr6:64511974-74144994&hgsid=443362677_4V80BwZqd7j9QbFDPX1nAl3yp6cs
6	74095910	77873771	159	-0.3999	3777862	http://genome.ucsc.edu/cgi-bin/hgTracks?db=hg19&position=chr6:74045910-77923771&hgsid=443362677_4V80BwZqd7j9QbFDPX1nAl3yp6cs
6	77895249	79187832	23	-1.5226	1292584	http://genome.ucsc.edu/cgi-bin/hgTracks?db=hg19&position=chr6:77845249-79237832&hgsid=443362677_4V80BwZqd7j9QbFDPX1nAl3yp6cs
6	79327392	81195083	50	-0.2366	1867692	http://genome.ucsc.edu/cgi-bin/hgTracks?db=hg19&position=chr6:79277392-81245083&hgsid=443362677_4V80BwZqd7j9QbFDPX1nAl3yp6cs
6	81368678	82235354	13	-1.6317	866677	http://genome.ucsc.edu/cgi-bin/hgTracks?db=hg19&position=chr6:81318678-82285354&hgsid=443362677_4V80BwZqd7j9QbFDPX1nAl3yp6cs
6	82259261	85268800	84	-0.2065	3009540	http://genome.ucsc.edu/cgi-bin/hgTracks?db=hg19&position=chr6:82209261-85318800&hgsid=443362677_4V80BwZqd7j9QbFDPX1nAl3yp6cs
6	85382452	85906416	9	-1.5999	523965	http://genome.ucsc.edu/cgi-bin/hgTracks?db=hg19&position=chr6:85332452-85956416&hgsid=443362677_4V80BwZqd7j9QbFDPX1nAl3yp6cs
6	85980535	86390771	25	-0.08	410237	http://genome.ucsc.edu/cgi-bin/hgTracks?db=hg19&position=chr6:85930535-86440771&hgsid=443362677_4V80BwZqd7j9QbFDPX1nAl3yp6cs
6	86417945	87296657	14	-1.7524	878713	http://genome.ucsc.edu/cgi-bin/hgTracks?db=hg19&position=chr6:86367945-87346657&hgsid=443362677_4V80BwZqd7j9QbFDPX1nAl3yp6cs
6	87325860	90598375	185	-0.3141	3272516	http://genome.ucsc.edu/cgi-bin/hgTracks?db=hg19&position=chr6:87275860-90648375&hgsid=443362677_4V80BwZqd7j9QbFDPX1nAl3yp6cs
6	90610589	90899251	9	-2.0316	288663	http://genome.ucsc.edu/cgi-bin/hgTracks?db=hg19&position=chr6:90560589-90949251&hgsid=443362677_4V80BwZqd7j9QbFDPX1nAl3yp6cs
6	91052537	123447437	1104	-0.2279	32394901	http://genome.ucsc.edu/cgi-bin/hgTracks?db=hg19&position=chr6:91002537-123497437&hgsid=443362677_4V80BwZqd7j9QbFDPX1nAl3yp6cs
6	123526259	124478172	27	-1.5321	951914	http://genome.ucsc.edu/cgi-bin/hgTracks?db=hg19&position=chr6:123476259-124528172&hgsid=443362677_4V80BwZqd7j9QbFDPX1nAl3yp6cs
6	124499021	145324256	738	-0.3113	20825236	http://genome.ucsc.edu/cgi-bin/hgTracks?db=hg19&position=chr6:124449021-145374256&hgsid=443362677_4V80BwZqd7j9QbFDPX1nAl3yp6cs
6	145356862	145843181	10	-1.4276	486320	http://genome.ucsc.edu/cgi-bin/hgTracks?db=hg19&position=chr6:145306862-145893181&hgsid=443362677_4V80BwZqd7j9QbFDPX1nAl3yp6cs
6	145918123	146191490	8	0.0731	273368	http://genome.ucsc.edu/cgi-bin/hgTracks?db=hg19&position=chr6:145868123-146241490&hgsid=443362677_4V80BwZqd7j9QbFDPX1nAl3yp6cs
6	146200972	147142935	24	-1.3259	941964	http://genome.ucsc.edu/cgi-bin/hgTracks?db=hg19&position=chr6:146150972-147192935&hgsid=443362677_4V80BwZqd7j9QbFDPX1nAl3yp6cs
6	147155585	152044929	329	-0.1812	4889345	http://genome.ucsc.edu/cgi-bin/hgTracks?db=hg19&position=chr6:147105585-152094929&hgsid=443362677_4V80BwZqd7j9QbFDPX1nAl3yp6cs
6	152096805	153274693	46	-1.5072	1177889	http://genome.ucsc.edu/cgi-bin/hgTracks?db=hg19&position=chr6:152046805-153324693&hgsid=443362677_4V80BwZqd7j9QbFDPX1nAl3yp6cs
6	153312774	156221555	162	-0.2929	2908782	http://genome.ucsc.edu/cgi-bin/hgTracks?db=hg19&position=chr6:153262774-156271555&hgsid=443362677_4V80BwZqd7j9QbFDPX1nAl3yp6cs
6	156241722	157046589	32	-1.2088	804868	http://genome.ucsc.edu/cgi-bin/hgTracks?db=hg19&position=chr6:156191722-157096589&hgsid=443362677_4V80BwZqd7j9QbFDPX1nAl3yp6cs
6	157057267	162562086	277	-0.3499	5504820	http://genome.ucsc.edu/cgi-bin/hgTracks?db=hg19&position=chr6:157007267-162612086&hgsid=443362677_4V80BwZqd7j9QbFDPX1nAl3yp6cs
6	162581847	165781577	114	-1.1126	3199731	http://genome.ucsc.edu/cgi-bin/hgTracks?db=hg19&position=chr6:162531847-165831577&hgsid=443362677_4V80BwZqd7j9QbFDPX1nAl3yp6cs
6	165824500	170866748	153	-0.205	5042249	http://genome.ucsc.edu/cgi-bin/hgTracks?db=hg19&position=chr6:165774500-170916748&hgsid=443362677_4V80BwZqd7j9QbFDPX1nAl3yp6cs
7	28262	2937341	183	-0.6011	2909080	http://genome.ucsc.edu/cgi-bin/hgTracks?db=hg19&position=chr7:-21738-2987341&hgsid=443362677_4V80BwZqd7j9QbFDPX1nAl3yp6cs
7	2939405	4969248	148	-1.3232	2029844	http://genome.ucsc.edu/cgi-bin/hgTracks?db=hg19&position=chr7:2889405-5019248&hgsid=443362677_4V80BwZqd7j9QbFDPX1nAl3yp6cs
7	4974741	8456890	335	-0.413	3482150	http://genome.ucsc.edu/cgi-bin/hgTracks?db=hg19&position=chr7:4924741-8506890&hgsid=443362677_4V80BwZqd7j9QbFDPX1nAl3yp6cs
7	8463829	10434683	37	-1.7395	1970855	http://genome.ucsc.edu/cgi-bin/hgTracks?db=hg19&position=chr7:8413829-10484683&hgsid=443362677_4V80BwZqd7j9QbFDPX1nAl3yp6cs
7	10451789	18013399	241	-0.3672	7561611	http://genome.ucsc.edu/cgi-bin/hgTracks?db=hg19&position=chr7:10401789-18063399&hgsid=443362677_4V80BwZqd7j9QbFDPX1nAl3yp6cs
7	18015434	19379705	53	-1.4252	1364272	http://genome.ucsc.edu/cgi-bin/hgTracks?db=hg19&position=chr7:17965434-19429705&hgsid=443362677_4V80BwZqd7j9QbFDPX1nAl3yp6cs
7	19384034	22897262	122	-0.5653	3513229	http://genome.ucsc.edu/cgi-bin/hgTracks?db=hg19&position=chr7:19334034-22947262&hgsid=443362677_4V80BwZqd7j9QbFDPX1nAl3yp6cs
7	22914231	23109308	16	-1.9466	195078	http://genome.ucsc.edu/cgi-bin/hgTracks?db=hg19&position=chr7:22864231-23159308&hgsid=443362677_4V80BwZqd7j9QbFDPX1nAl3yp6cs
7	23113471	25044818	105	-0.6688	1931348	http://genome.ucsc.edu/cgi-bin/hgTracks?db=hg19&position=chr7:23063471-25094818&hgsid=443362677_4V80BwZqd7j9QbFDPX1nAl3yp6cs
7	25048444	26060469	29	-1.3651	1012026	http://genome.ucsc.edu/cgi-bin/hgTracks?db=hg19&position=chr7:24998444-26110469&hgsid=443362677_4V80BwZqd7j9QbFDPX1nAl3yp6cs
7	26076711	29008681	159	-0.2527	2931971	http://genome.ucsc.edu/cgi-bin/hgTracks?db=hg19&position=chr7:26026711-29058681&hgsid=443362677_4V80BwZqd7j9QbFDPX1nAl3yp6cs
7	29080840	29120098	6	-2.0283	39259	http://genome.ucsc.edu/cgi-bin/hgTracks?db=hg19&position=chr7:29030840-29170098&hgsid=443362677_4V80BwZqd7j9QbFDPX1nAl3yp6cs
7	29141135	30666521	57	-0.3036	1525387	http://genome.ucsc.edu/cgi-bin/hgTracks?db=hg19&position=chr7:29091135-30716521&hgsid=443362677_4V80BwZqd7j9QbFDPX1nAl3yp6cs
7	30675291	32446811	42	-1.3302	1771521	http://genome.ucsc.edu/cgi-bin/hgTracks?db=hg19&position=chr7:30625291-32496811&hgsid=443362677_4V80BwZqd7j9QbFDPX1nAl3yp6cs
7	32490219	36992664	195	-0.5163	4502446	http://genome.ucsc.edu/cgi-bin/hgTracks?db=hg19&position=chr7:32440219-37042664&hgsid=443362677_4V80BwZqd7j9QbFDPX1nAl3yp6cs
7	37114844	39538912	69	-1.3918	2424069	http://genome.ucsc.edu/cgi-bin/hgTracks?db=hg19&position=chr7:37064844-39588912&hgsid=443362677_4V80BwZqd7j9QbFDPX1nAl3yp6cs
7	39579079	40205645	58	-0.4952	626567	http://genome.ucsc.edu/cgi-bin/hgTracks?db=hg19&position=chr7:39529079-40255645&hgsid=443362677_4V80BwZqd7j9QbFDPX1nAl3yp6cs
7	40214911	43606342	126	-1.74	3391432	http://genome.ucsc.edu/cgi-bin/hgTracks?db=hg19&position=chr7:40164911-43656342&hgsid=443362677_4V80BwZqd7j9QbFDPX1nAl3yp6cs
7	43624720	45138569	128	-0.2661	1513850	http://genome.ucsc.edu/cgi-bin/hgTracks?db=hg19&position=chr7:43574720-45188569&hgsid=443362677_4V80BwZqd7j9QbFDPX1nAl3yp6cs
7	45324815	45598047	12	-1.9183	273233	http://genome.ucsc.edu/cgi-bin/hgTracks?db=hg19&position=chr7:45274815-45648047&hgsid=443362677_4V80BwZqd7j9QbFDPX1nAl3yp6cs
7	45602088	48334136	128	-0.5157	2732049	http://genome.ucsc.edu/cgi-bin/hgTracks?db=hg19&position=chr7:45552088-48384136&hgsid=443362677_4V80BwZqd7j9QbFDPX1nAl3yp6cs
7	48374024	50178869	33	-1.7486	1804846	http://genome.ucsc.edu/cgi-bin/hgTracks?db=hg19&position=chr7:48324024-50228869&hgsid=443362677_4V80BwZqd7j9QbFDPX1nAl3yp6cs
7	50182853	52513475	74	-0.4533	2330623	http://genome.ucsc.edu/cgi-bin/hgTracks?db=hg19&position=chr7:50132853-52563475&hgsid=443362677_4V80BwZqd7j9QbFDPX1nAl3yp6cs
7	52528676	54794364	55	-1.8155	2265689	http://genome.ucsc.edu/cgi-bin/hgTracks?db=hg19&position=chr7:52478676-54844364&hgsid=443362677_4V80BwZqd7j9QbFDPX1nAl3yp6cs
7	54815565	56177901	117	-0.424	1362337	http://genome.ucsc.edu/cgi-bin/hgTracks?db=hg19&position=chr7:54765565-56227901&hgsid=443362677_4V80BwZqd7j9QbFDPX1nAl3yp6cs
7	56187447	57873380	126	-1.2467	1685934	http://genome.ucsc.edu/cgi-bin/hgTracks?db=hg19&position=chr7:56137447-57923380&hgsid=443362677_4V80BwZqd7j9QbFDPX1nAl3yp6cs
7	61060852	64120370	110	-1.1872	3059519	http://genome.ucsc.edu/cgi-bin/hgTracks?db=hg19&position=chr7:61010852-64170370&hgsid=443362677_4V80BwZqd7j9QbFDPX1nAl3yp6cs
7	64132252	66847386	305	-0.3002	2715135	http://genome.ucsc.edu/cgi-bin/hgTracks?db=hg19&position=chr7:64082252-66897386&hgsid=443362677_4V80BwZqd7j9QbFDPX1nAl3yp6cs
7	66849577	69521066	213	-1.5961	2671490	http://genome.ucsc.edu/cgi-bin/hgTracks?db=hg19&position=chr7:66799577-69571066&hgsid=443362677_4V80BwZqd7j9QbFDPX1nAl3yp6cs
7	69526866	70272211	48	-0.2287	745346	http://genome.ucsc.edu/cgi-bin/hgTracks?db=hg19&position=chr7:69476866-70322211&hgsid=443362677_4V80BwZqd7j9QbFDPX1nAl3yp6cs
7	70272446	72033039	125	-1.4516	1760594	http://genome.ucsc.edu/cgi-bin/hgTracks?db=hg19&position=chr7:70222446-72083039&hgsid=443362677_4V80BwZqd7j9QbFDPX1nAl3yp6cs
7	72035547	77614047	568	-0.2836	5578501	http://genome.ucsc.edu/cgi-bin/hgTracks?db=hg19&position=chr7:71985547-77664047&hgsid=443362677_4V80BwZqd7j9QbFDPX1nAl3yp6cs
7	77616225	78498162	36	-1.4079	881938	http://genome.ucsc.edu/cgi-bin/hgTracks?db=hg19&position=chr7:77566225-78548162&hgsid=443362677_4V80BwZqd7j9QbFDPX1nAl3yp6cs
7	78523642	88069155	282	-0.7129	9545514	http://genome.ucsc.edu/cgi-bin/hgTracks?db=hg19&position=chr7:78473642-88119155&hgsid=443362677_4V80BwZqd7j9QbFDPX1nAl3yp6cs
7	88361378	89714638	25	-1.9961	1353261	http://genome.ucsc.edu/cgi-bin/hgTracks?db=hg19&position=chr7:88311378-89764638&hgsid=443362677_4V80BwZqd7j9QbFDPX1nAl3yp6cs
7	89770967	90057673	15	-0.1035	286707	http://genome.ucsc.edu/cgi-bin/hgTracks?db=hg19&position=chr7:89720967-90107673&hgsid=443362677_4V80BwZqd7j9QbFDPX1nAl3yp6cs
7	90068611	91551151	41	-1.6589	1482541	http://genome.ucsc.edu/cgi-bin/hgTracks?db=hg19&position=chr7:90018611-91601151&hgsid=443362677_4V80BwZqd7j9QbFDPX1nAl3yp6cs
7	91579636	92949758	59	-0.2556	1370123	http://genome.ucsc.edu/cgi-bin/hgTracks?db=hg19&position=chr7:91529636-92999758&hgsid=443362677_4V80BwZqd7j9QbFDPX1nAl3yp6cs
7	93059336	94812855	42	-1.7466	1753520	http://genome.ucsc.edu/cgi-bin/hgTracks?db=hg19&position=chr7:93009336-94862855&hgsid=443362677_4V80BwZqd7j9QbFDPX1nAl3yp6cs
7	94818841	95924585	36	-0.5038	1105745	http://genome.ucsc.edu/cgi-bin/hgTracks?db=hg19&position=chr7:94768841-95974585&hgsid=443362677_4V80BwZqd7j9QbFDPX1nAl3yp6cs
7	95973193	97351117	55	-1.5887	1377925	http://genome.ucsc.edu/cgi-bin/hgTracks?db=hg19&position=chr7:95923193-97401117&hgsid=443362677_4V80BwZqd7j9QbFDPX1nAl3yp6cs
7	97382021	100910770	386	-0.3609	3528750	http://genome.ucsc.edu/cgi-bin/hgTracks?db=hg19&position=chr7:97332021-100960770&hgsid=443362677_4V80BwZqd7j9QbFDPX1nAl3yp6cs
7	100915867	101465227	76	-1.0283	549361	http://genome.ucsc.edu/cgi-bin/hgTracks?db=hg19&position=chr7:100865867-101515227&hgsid=443362677_4V80BwZqd7j9QbFDPX1nAl3yp6cs
7	101478200	103022889	99	-0.2348	1544690	http://genome.ucsc.edu/cgi-bin/hgTracks?db=hg19&position=chr7:101428200-103072889&hgsid=443362677_4V80BwZqd7j9QbFDPX1nAl3yp6cs
7	103025702	103139031	7	-2.357	113330	http://genome.ucsc.edu/cgi-bin/hgTracks?db=hg19&position=chr7:102975702-103189031&hgsid=443362677_4V80BwZqd7j9QbFDPX1nAl3yp6cs
7	103144575	108353063	232	-0.5295	5208489	http://genome.ucsc.edu/cgi-bin/hgTracks?db=hg19&position=chr7:103094575-108403063&hgsid=443362677_4V80BwZqd7j9QbFDPX1nAl3yp6cs
7	108379148	110343994	37	-1.5005	1964847	http://genome.ucsc.edu/cgi-bin/hgTracks?db=hg19&position=chr7:108329148-110393994&hgsid=443362677_4V80BwZqd7j9QbFDPX1nAl3yp6cs
7	110370673	111171100	15	-0.1548	800428	http://genome.ucsc.edu/cgi-bin/hgTracks?db=hg19&position=chr7:110320673-111221100&hgsid=443362677_4V80BwZqd7j9QbFDPX1nAl3yp6cs
7	111203137	111522761	15	-1.6596	319625	http://genome.ucsc.edu/cgi-bin/hgTracks?db=hg19&position=chr7:111153137-111572761&hgsid=443362677_4V80BwZqd7j9QbFDPX1nAl3yp6cs
7	111534202	123722490	310	-0.3824	12188289	http://genome.ucsc.edu/cgi-bin/hgTracks?db=hg19&position=chr7:111484202-123772490&hgsid=443362677_4V80BwZqd7j9QbFDPX1nAl3yp6cs
7	123744976	124265522	6	-1.695	520547	http://genome.ucsc.edu/cgi-bin/hgTracks?db=hg19&position=chr7:123694976-124315522&hgsid=443362677_4V80BwZqd7j9QbFDPX1nAl3yp6cs
7	124295669	125236702	31	-0.4339	941034	http://genome.ucsc.edu/cgi-bin/hgTracks?db=hg19&position=chr7:124245669-125286702&hgsid=443362677_4V80BwZqd7j9QbFDPX1nAl3yp6cs
7	125298453	126518666	27	-1.5588	1220214	http://genome.ucsc.edu/cgi-bin/hgTracks?db=hg19&position=chr7:125248453-126568666&hgsid=443362677_4V80BwZqd7j9QbFDPX1nAl3yp6cs
7	126540656	133737915	411	-0.3838	7197260	http://genome.ucsc.edu/cgi-bin/hgTracks?db=hg19&position=chr7:126490656-133787915&hgsid=443362677_4V80BwZqd7j9QbFDPX1nAl3yp6cs
7	133794428	134920669	45	-1.4607	1126242	http://genome.ucsc.edu/cgi-bin/hgTracks?db=hg19&position=chr7:133744428-134970669&hgsid=443362677_4V80BwZqd7j9QbFDPX1nAl3yp6cs
7	134922568	135775381	45	-0.4784	852814	http://genome.ucsc.edu/cgi-bin/hgTracks?db=hg19&position=chr7:134872568-135825381&hgsid=443362677_4V80BwZqd7j9QbFDPX1nAl3yp6cs
7	135836396	138036948	86	-1.4029	2200553	http://genome.ucsc.edu/cgi-bin/hgTracks?db=hg19&position=chr7:135786396-138086948&hgsid=443362677_4V80BwZqd7j9QbFDPX1nAl3yp6cs
7	138053599	138333377	21	-0.2938	279779	http://genome.ucsc.edu/cgi-bin/hgTracks?db=hg19&position=chr7:138003599-138383377&hgsid=443362677_4V80BwZqd7j9QbFDPX1nAl3yp6cs
7	138334669	138428127	11	-1.6054	93459	http://genome.ucsc.edu/cgi-bin/hgTracks?db=hg19&position=chr7:138284669-138478127&hgsid=443362677_4V80BwZqd7j9QbFDPX1nAl3yp6cs
7	138430613	140799722	209	-0.2571	2369110	http://genome.ucsc.edu/cgi-bin/hgTracks?db=hg19&position=chr7:138380613-140849722&hgsid=443362677_4V80BwZqd7j9QbFDPX1nAl3yp6cs
7	140838708	141245767	16	-1.9245	407060	http://genome.ucsc.edu/cgi-bin/hgTracks?db=hg19&position=chr7:140788708-141295767&hgsid=443362677_4V80BwZqd7j9QbFDPX1nAl3yp6cs
7	141250223	144253111	100	-0.4417	3002889	http://genome.ucsc.edu/cgi-bin/hgTracks?db=hg19&position=chr7:141200223-144303111&hgsid=443362677_4V80BwZqd7j9QbFDPX1nAl3yp6cs
7	144263288	147935365	162	-1.5457	3672078	http://genome.ucsc.edu/cgi-bin/hgTracks?db=hg19&position=chr7:144213288-147985365&hgsid=443362677_4V80BwZqd7j9QbFDPX1nAl3yp6cs
7	147958345	152565210	358	-0.4867	4606866	http://genome.ucsc.edu/cgi-bin/hgTracks?db=hg19&position=chr7:147908345-152615210&hgsid=443362677_4V80BwZqd7j9QbFDPX1nAl3yp6cs
7	152580400	154714268	61	-1.4437	2133869	http://genome.ucsc.edu/cgi-bin/hgTracks?db=hg19&position=chr7:152530400-154764268&hgsid=443362677_4V80BwZqd7j9QbFDPX1nAl3yp6cs
7	154749601	159109010	186	-0.6029	4359410	http://genome.ucsc.edu/cgi-bin/hgTracks?db=hg19&position=chr7:154699601-159159010&hgsid=443362677_4V80BwZqd7j9QbFDPX1nAl3yp6cs
8	207053	1973768	53	-0.229	1766716	http://genome.ucsc.edu/cgi-bin/hgTracks?db=hg19&position=chr8:157053-2023768&hgsid=443362677_4V80BwZqd7j9QbFDPX1nAl3yp6cs
8	2017793	5429786	114	-1.0179	3411994	http://genome.ucsc.edu/cgi-bin/hgTracks?db=hg19&position=chr8:1967793-5479786&hgsid=443362677_4V80BwZqd7j9QbFDPX1nAl3yp6cs
8	5435428	12528824	301	-0.2626	7093397	http://genome.ucsc.edu/cgi-bin/hgTracks?db=hg19&position=chr8:5385428-12578824&hgsid=443362677_4V80BwZqd7j9QbFDPX1nAl3yp6cs
8	12619980	16669253	169	-0.8671	4049274	http://genome.ucsc.edu/cgi-bin/hgTracks?db=hg19&position=chr8:12569980-16719253&hgsid=443362677_4V80BwZqd7j9QbFDPX1nAl3yp6cs
8	16692669	19696507	140	-0.0218	3003839	http://genome.ucsc.edu/cgi-bin/hgTracks?db=hg19&position=chr8:16642669-19746507&hgsid=443362677_4V80BwZqd7j9QbFDPX1nAl3yp6cs
8	19764003	21733372	68	-0.9545	1969370	http://genome.ucsc.edu/cgi-bin/hgTracks?db=hg19&position=chr8:19714003-21783372&hgsid=443362677_4V80BwZqd7j9QbFDPX1nAl3yp6cs
8	21736929	40116479	851	-0.208	18379551	http://genome.ucsc.edu/cgi-bin/hgTracks?db=hg19&position=chr8:21686929-40166479&hgsid=443362677_4V80BwZqd7j9QbFDPX1nAl3yp6cs
8	40120627	40911189	17	-1.3722	790563	http://genome.ucsc.edu/cgi-bin/hgTracks?db=hg19&position=chr8:40070627-40961189&hgsid=443362677_4V80BwZqd7j9QbFDPX1nAl3yp6cs
8	40920680	42555249	138	-0.1571	1634570	http://genome.ucsc.edu/cgi-bin/hgTracks?db=hg19&position=chr8:40870680-42605249&hgsid=443362677_4V80BwZqd7j9QbFDPX1nAl3yp6cs
8	42557830	42680533	24	-1.1888	122704	http://genome.ucsc.edu/cgi-bin/hgTracks?db=hg19&position=chr8:42507830-42730533&hgsid=443362677_4V80BwZqd7j9QbFDPX1nAl3yp6cs
8	42682021	43091656	51	-0.0425	409636	http://genome.ucsc.edu/cgi-bin/hgTracks?db=hg19&position=chr8:42632021-43141656&hgsid=443362677_4V80BwZqd7j9QbFDPX1nAl3yp6cs
8	43125053	43801451	8	-1.6295	676399	http://genome.ucsc.edu/cgi-bin/hgTracks?db=hg19&position=chr8:43075053-43851451&hgsid=443362677_4V80BwZqd7j9QbFDPX1nAl3yp6cs
8	46864127	48014169	10	-1.8307	1150043	http://genome.ucsc.edu/cgi-bin/hgTracks?db=hg19&position=chr8:46814127-48064169&hgsid=443362677_4V80BwZqd7j9QbFDPX1nAl3yp6cs
8	48061402	57577458	413	-0.7516	9516057	http://genome.ucsc.edu/cgi-bin/hgTracks?db=hg19&position=chr8:48011402-57627458&hgsid=443362677_4V80BwZqd7j9QbFDPX1nAl3yp6cs
8	57587464	61022255	91	-1.6575	3434792	http://genome.ucsc.edu/cgi-bin/hgTracks?db=hg19&position=chr8:57537464-61072255&hgsid=443362677_4V80BwZqd7j9QbFDPX1nAl3yp6cs
8	61050782	64141080	77	-0.4767	3090299	http://genome.ucsc.edu/cgi-bin/hgTracks?db=hg19&position=chr8:61000782-64191080&hgsid=443362677_4V80BwZqd7j9QbFDPX1nAl3yp6cs
8	64144983	66469132	54	-1.7157	2324150	http://genome.ucsc.edu/cgi-bin/hgTracks?db=hg19&position=chr8:64094983-66519132&hgsid=443362677_4V80BwZqd7j9QbFDPX1nAl3yp6cs
8	66506685	68358425	115	-0.4478	1851741	http://genome.ucsc.edu/cgi-bin/hgTracks?db=hg19&position=chr8:66456685-68408425&hgsid=443362677_4V80BwZqd7j9QbFDPX1nAl3yp6cs
8	68362143	76307043	271	-1.1074	7944901	http://genome.ucsc.edu/cgi-bin/hgTracks?db=hg19&position=chr8:68312143-76357043&hgsid=443362677_4V80BwZqd7j9QbFDPX1nAl3yp6cs
8	76331055	76439094	11	0.0085	108040	http://genome.ucsc.edu/cgi-bin/hgTracks?db=hg19&position=chr8:76281055-76489094&hgsid=443362677_4V80BwZqd7j9QbFDPX1nAl3yp6cs
8	76611888	80518356	49	-1.8709	3906469	http://genome.ucsc.edu/cgi-bin/hgTracks?db=hg19&position=chr8:76561888-80568356&hgsid=443362677_4V80BwZqd7j9QbFDPX1nAl3yp6cs
8	80595710	82215323	81	-0.6259	1619614	http://genome.ucsc.edu/cgi-bin/hgTracks?db=hg19&position=chr8:80545710-82265323&hgsid=443362677_4V80BwZqd7j9QbFDPX1nAl3yp6cs
8	82255167	86005511	92	-1.4937	3750345	http://genome.ucsc.edu/cgi-bin/hgTracks?db=hg19&position=chr8:82205167-86055511&hgsid=443362677_4V80BwZqd7j9QbFDPX1nAl3yp6cs
8	86016605	86507270	23	-0.2462	490666	http://genome.ucsc.edu/cgi-bin/hgTracks?db=hg19&position=chr8:85966605-86557270&hgsid=443362677_4V80BwZqd7j9QbFDPX1nAl3yp6cs
8	86517424	87319137	19	-1.7473	801714	http://genome.ucsc.edu/cgi-bin/hgTracks?db=hg19&position=chr8:86467424-87369137&hgsid=443362677_4V80BwZqd7j9QbFDPX1nAl3yp6cs
8	87320180	87580269	23	-0.1953	260090	http://genome.ucsc.edu/cgi-bin/hgTracks?db=hg19&position=chr8:87270180-87630269&hgsid=443362677_4V80BwZqd7j9QbFDPX1nAl3yp6cs
8	87634198	93881590	141	-1.5604	6247393	http://genome.ucsc.edu/cgi-bin/hgTracks?db=hg19&position=chr8:87584198-93931590&hgsid=443362677_4V80BwZqd7j9QbFDPX1nAl3yp6cs
8	93927812	94461954	13	0.0319	534143	http://genome.ucsc.edu/cgi-bin/hgTracks?db=hg19&position=chr8:93877812-94511954&hgsid=443362677_4V80BwZqd7j9QbFDPX1nAl3yp6cs
8	94501823	94699595	7	-2.1998	197773	http://genome.ucsc.edu/cgi-bin/hgTracks?db=hg19&position=chr8:94451823-94749595&hgsid=443362677_4V80BwZqd7j9QbFDPX1nAl3yp6cs
8	94763140	96331230	110	-0.3369	1568091	http://genome.ucsc.edu/cgi-bin/hgTracks?db=hg19&position=chr8:94713140-96381230&hgsid=443362677_4V80BwZqd7j9QbFDPX1nAl3yp6cs
8	96360961	97191423	22	-2.1725	830463	http://genome.ucsc.edu/cgi-bin/hgTracks?db=hg19&position=chr8:96310961-97241423&hgsid=443362677_4V80BwZqd7j9QbFDPX1nAl3yp6cs
8	97192206	97353816	12	-0.0975	161611	http://genome.ucsc.edu/cgi-bin/hgTracks?db=hg19&position=chr8:97142206-97403816&hgsid=443362677_4V80BwZqd7j9QbFDPX1nAl3yp6cs
8	97404961	98646651	33	-1.7483	1241691	http://genome.ucsc.edu/cgi-bin/hgTracks?db=hg19&position=chr8:97354961-98696651&hgsid=443362677_4V80BwZqd7j9QbFDPX1nAl3yp6cs
8	98649292	104480680	342	-0.6254	5831389	http://genome.ucsc.edu/cgi-bin/hgTracks?db=hg19&position=chr8:98599292-104530680&hgsid=443362677_4V80BwZqd7j9QbFDPX1nAl3yp6cs
8	104482214	112406346	209	-1.2979	7924133	http://genome.ucsc.edu/cgi-bin/hgTracks?db=hg19&position=chr8:104432214-112456346&hgsid=443362677_4V80BwZqd7j9QbFDPX1nAl3yp6cs
8	112437174	116018469	95	-1.9201	3581296	http://genome.ucsc.edu/cgi-bin/hgTracks?db=hg19&position=chr8:112387174-116068469&hgsid=443362677_4V80BwZqd7j9QbFDPX1nAl3yp6cs
8	116052167	118826169	75	-1.0621	2774003	http://genome.ucsc.edu/cgi-bin/hgTracks?db=hg19&position=chr8:116002167-118876169&hgsid=443362677_4V80BwZqd7j9QbFDPX1nAl3yp6cs
8	118868586	126659681	371	-0.5305	7791096	http://genome.ucsc.edu/cgi-bin/hgTracks?db=hg19&position=chr8:118818586-126709681&hgsid=443362677_4V80BwZqd7j9QbFDPX1nAl3yp6cs
8	126675251	127830467	40	-1.4666	1155217	http://genome.ucsc.edu/cgi-bin/hgTracks?db=hg19&position=chr8:126625251-127880467&hgsid=443362677_4V80BwZqd7j9QbFDPX1nAl3yp6cs
8	127892194	128986150	50	-0.4894	1093957	http://genome.ucsc.edu/cgi-bin/hgTracks?db=hg19&position=chr8:127842194-129036150&hgsid=443362677_4V80BwZqd7j9QbFDPX1nAl3yp6cs
8	128996217	130784431	37	-1.8897	1788215	http://genome.ucsc.edu/cgi-bin/hgTracks?db=hg19&position=chr8:128946217-130834431&hgsid=443362677_4V80BwZqd7j9QbFDPX1nAl3yp6cs
8	130798502	131371962	33	-0.2579	573461	http://genome.ucsc.edu/cgi-bin/hgTracks?db=hg19&position=chr8:130748502-131421962&hgsid=443362677_4V80BwZqd7j9QbFDPX1nAl3yp6cs
8	131393222	133306340	47	-1.5869	1913119	http://genome.ucsc.edu/cgi-bin/hgTracks?db=hg19&position=chr8:131343222-133356340&hgsid=443362677_4V80BwZqd7j9QbFDPX1nAl3yp6cs
8	133347380	134762797	44	-0.5878	1415418	http://genome.ucsc.edu/cgi-bin/hgTracks?db=hg19&position=chr8:133297380-134812797&hgsid=443362677_4V80BwZqd7j9QbFDPX1nAl3yp6cs
8	134931627	140429273	143	-1.5016	5497647	http://genome.ucsc.edu/cgi-bin/hgTracks?db=hg19&position=chr8:134881627-140479273&hgsid=443362677_4V80BwZqd7j9QbFDPX1nAl3yp6cs
8	140468279	141470865	47	-0.1417	1002587	http://genome.ucsc.edu/cgi-bin/hgTracks?db=hg19&position=chr8:140418279-141520865&hgsid=443362677_4V80BwZqd7j9QbFDPX1nAl3yp6cs
8	141479187	141501284	6	-1.8295	22098	http://genome.ucsc.edu/cgi-bin/hgTracks?db=hg19&position=chr8:141429187-141551284&hgsid=443362677_4V80BwZqd7j9QbFDPX1nAl3yp6cs
8	141514318	146297866	236	-0.38	4783549	http://genome.ucsc.edu/cgi-bin/hgTracks?db=hg19&position=chr8:141464318-146347866&hgsid=443362677_4V80BwZqd7j9QbFDPX1nAl3yp6cs
9	119529	7067888	329	-0.4492	6948360	http://genome.ucsc.edu/cgi-bin/hgTracks?db=hg19&position=chr9:69529-7117888&hgsid=443362677_4V80BwZqd7j9QbFDPX1nAl3yp6cs
9	7302082	13916860	150	-1.2139	6614779	http://genome.ucsc.edu/cgi-bin/hgTracks?db=hg19&position=chr9:7252082-13966860&hgsid=443362677_4V80BwZqd7j9QbFDPX1nAl3yp6cs
9	14029524	15651199	89	-0.1639	1621676	http://genome.ucsc.edu/cgi-bin/hgTracks?db=hg19&position=chr9:13979524-15701199&hgsid=443362677_4V80BwZqd7j9QbFDPX1nAl3yp6cs
9	15656244	19007269	108	-1.3997	3351026	http://genome.ucsc.edu/cgi-bin/hgTracks?db=hg19&position=chr9:15606244-19057269&hgsid=443362677_4V80BwZqd7j9QbFDPX1nAl3yp6cs
9	19013637	22173864	114	-0.2559	3160228	http://genome.ucsc.edu/cgi-bin/hgTracks?db=hg19&position=chr9:18963637-22223864&hgsid=443362677_4V80BwZqd7j9QbFDPX1nAl3yp6cs
9	22210012	26825236	106	-1.1819	4615225	http://genome.ucsc.edu/cgi-bin/hgTracks?db=hg19&position=chr9:22160012-26875236&hgsid=443362677_4V80BwZqd7j9QbFDPX1nAl3yp6cs
9	26847305	27738947	45	-0.0758	891643	http://genome.ucsc.edu/cgi-bin/hgTracks?db=hg19&position=chr9:26797305-27788947&hgsid=443362677_4V80BwZqd7j9QbFDPX1nAl3yp6cs
9	27794124	31035572	71	-1.4655	3241449	http://genome.ucsc.edu/cgi-bin/hgTracks?db=hg19&position=chr9:27744124-31085572&hgsid=443362677_4V80BwZqd7j9QbFDPX1nAl3yp6cs
9	31105668	47266171	711	-0.376	16160504	http://genome.ucsc.edu/cgi-bin/hgTracks?db=hg19&position=chr9:31055668-47316171&hgsid=443362677_4V80BwZqd7j9QbFDPX1nAl3yp6cs
9	65525248	70885723	80	-0.3764	5360476	http://genome.ucsc.edu/cgi-bin/hgTracks?db=hg19&position=chr9:65475248-70935723&hgsid=443362677_4V80BwZqd7j9QbFDPX1nAl3yp6cs
9	71036557	71180867	6	-2.2233	144311	http://genome.ucsc.edu/cgi-bin/hgTracks?db=hg19&position=chr9:70986557-71230867&hgsid=443362677_4V80BwZqd7j9QbFDPX1nAl3yp6cs
9	71196619	73066475	91	-0.3122	1869857	http://genome.ucsc.edu/cgi-bin/hgTracks?db=hg19&position=chr9:71146619-73116475&hgsid=443362677_4V80BwZqd7j9QbFDPX1nAl3yp6cs
9	73119226	74175826	33	-1.5514	1056601	http://genome.ucsc.edu/cgi-bin/hgTracks?db=hg19&position=chr9:73069226-74225826&hgsid=443362677_4V80BwZqd7j9QbFDPX1nAl3yp6cs
9	74239487	74609467	29	-0.2268	369981	http://genome.ucsc.edu/cgi-bin/hgTracks?db=hg19&position=chr9:74189487-74659467&hgsid=443362677_4V80BwZqd7j9QbFDPX1nAl3yp6cs
9	74612715	74665576	4	-2.335	52862	http://genome.ucsc.edu/cgi-bin/hgTracks?db=hg19&position=chr9:74562715-74715576&hgsid=443362677_4V80BwZqd7j9QbFDPX1nAl3yp6cs
9	74669007	76001269	83	0.0024	1332263	http://genome.ucsc.edu/cgi-bin/hgTracks?db=hg19&position=chr9:74619007-76051269&hgsid=443362677_4V80BwZqd7j9QbFDPX1nAl3yp6cs
9	76123235	77341350	27	-1.2147	1218116	http://genome.ucsc.edu/cgi-bin/hgTracks?db=hg19&position=chr9:76073235-77391350&hgsid=443362677_4V80BwZqd7j9QbFDPX1nAl3yp6cs
9	77372018	79384434	97	-0.1903	2012417	http://genome.ucsc.edu/cgi-bin/hgTracks?db=hg19&position=chr9:77322018-79434434&hgsid=443362677_4V80BwZqd7j9QbFDPX1nAl3yp6cs
9	79388452	79773322	34	-0.8663	384871	http://genome.ucsc.edu/cgi-bin/hgTracks?db=hg19&position=chr9:79338452-79823322&hgsid=443362677_4V80BwZqd7j9QbFDPX1nAl3yp6cs
9	79781019	81020107	66	0.1769	1239089	http://genome.ucsc.edu/cgi-bin/hgTracks?db=hg19&position=chr9:79731019-81070107&hgsid=443362677_4V80BwZqd7j9QbFDPX1nAl3yp6cs
9	81029028	84125400	89	-1.2292	3096373	http://genome.ucsc.edu/cgi-bin/hgTracks?db=hg19&position=chr9:80979028-84175400&hgsid=443362677_4V80BwZqd7j9QbFDPX1nAl3yp6cs
9	84129822	84343154	28	0.0505	213333	http://genome.ucsc.edu/cgi-bin/hgTracks?db=hg19&position=chr9:84079822-84393154&hgsid=443362677_4V80BwZqd7j9QbFDPX1nAl3yp6cs
9	84346391	85557951	74	-1.1987	1211561	http://genome.ucsc.edu/cgi-bin/hgTracks?db=hg19&position=chr9:84296391-85607951&hgsid=443362677_4V80BwZqd7j9QbFDPX1nAl3yp6cs
9	85559243	89048249	185	-0.3098	3489007	http://genome.ucsc.edu/cgi-bin/hgTracks?db=hg19&position=chr9:85509243-89098249&hgsid=443362677_4V80BwZqd7j9QbFDPX1nAl3yp6cs
9	89054374	89938650	36	-1.1614	884277	http://genome.ucsc.edu/cgi-bin/hgTracks?db=hg19&position=chr9:89004374-89988650&hgsid=443362677_4V80BwZqd7j9QbFDPX1nAl3yp6cs
9	89972509	91121264	91	-0.1695	1148756	http://genome.ucsc.edu/cgi-bin/hgTracks?db=hg19&position=chr9:89922509-91171264&hgsid=443362677_4V80BwZqd7j9QbFDPX1nAl3yp6cs
9	91123181	94767714	152	-0.7969	3644534	http://genome.ucsc.edu/cgi-bin/hgTracks?db=hg19&position=chr9:91073181-94817714&hgsid=443362677_4V80BwZqd7j9QbFDPX1nAl3yp6cs
9	94787219	102044321	453	-0.2444	7257103	http://genome.ucsc.edu/cgi-bin/hgTracks?db=hg19&position=chr9:94737219-102094321&hgsid=443362677_4V80BwZqd7j9QbFDPX1nAl3yp6cs
9	102077672	102279603	7	-1.9818	201932	http://genome.ucsc.edu/cgi-bin/hgTracks?db=hg19&position=chr9:102027672-102329603&hgsid=443362677_4V80BwZqd7j9QbFDPX1nAl3yp6cs
9	102301874	104379406	69	-0.4853	2077533	http://genome.ucsc.edu/cgi-bin/hgTracks?db=hg19&position=chr9:102251874-104429406&hgsid=443362677_4V80BwZqd7j9QbFDPX1nAl3yp6cs
9	104396539	107874302	100	-1.2375	3477764	http://genome.ucsc.edu/cgi-bin/hgTracks?db=hg19&position=chr9:104346539-107924302&hgsid=443362677_4V80BwZqd7j9QbFDPX1nAl3yp6cs
9	107879141	108636861	43	-0.2643	757721	http://genome.ucsc.edu/cgi-bin/hgTracks?db=hg19&position=chr9:107829141-108686861&hgsid=443362677_4V80BwZqd7j9QbFDPX1nAl3yp6cs
9	108641061	109556269	23	-1.2831	915209	http://genome.ucsc.edu/cgi-bin/hgTracks?db=hg19&position=chr9:108591061-109606269&hgsid=443362677_4V80BwZqd7j9QbFDPX1nAl3yp6cs
9	109556821	119629753	467	-0.3492	10072933	http://genome.ucsc.edu/cgi-bin/hgTracks?db=hg19&position=chr9:109506821-119679753&hgsid=443362677_4V80BwZqd7j9QbFDPX1nAl3yp6cs
9	119664228	123127126	88	-1.3988	3462899	http://genome.ucsc.edu/cgi-bin/hgTracks?db=hg19&position=chr9:119614228-123177126&hgsid=443362677_4V80BwZqd7j9QbFDPX1nAl3yp6cs
9	123129727	140705244	1419	-0.361	17575518	http://genome.ucsc.edu/cgi-bin/hgTracks?db=hg19&position=chr9:123079727-140755244&hgsid=443362677_4V80BwZqd7j9QbFDPX1nAl3yp6cs
9	140757435	141067511	20	-1.1564	310077	http://genome.ucsc.edu/cgi-bin/hgTracks?db=hg19&position=chr9:140707435-141117511&hgsid=443362677_4V80BwZqd7j9QbFDPX1nAl3yp6cs
10	77523	13713378	704	-0.2285	13635856	http://genome.ucsc.edu/cgi-bin/hgTracks?db=hg19&position=chr10:27523-13763378&hgsid=443362677_4V80BwZqd7j9QbFDPX1nAl3yp6cs
10	13721351	14277241	45	-0.9601	555891	http://genome.ucsc.edu/cgi-bin/hgTracks?db=hg19&position=chr10:13671351-14327241&hgsid=443362677_4V80BwZqd7j9QbFDPX1nAl3yp6cs
10	14281550	15217356	65	-0.2011	935807	http://genome.ucsc.edu/cgi-bin/hgTracks?db=hg19&position=chr10:14231550-15267356&hgsid=443362677_4V80BwZqd7j9QbFDPX1nAl3yp6cs
10	15222421	15722319	42	-0.8847	499899	http://genome.ucsc.edu/cgi-bin/hgTracks?db=hg19&position=chr10:15172421-15772319&hgsid=443362677_4V80BwZqd7j9QbFDPX1nAl3yp6cs
10	15776810	35845865	1061	-0.1616	20069056	http://genome.ucsc.edu/cgi-bin/hgTracks?db=hg19&position=chr10:15726810-35895865&hgsid=443362677_4V80BwZqd7j9QbFDPX1nAl3yp6cs
10	35852897	38248935	127	-1.1692	2396039	http://genome.ucsc.edu/cgi-bin/hgTracks?db=hg19&position=chr10:35802897-38298935&hgsid=443362677_4V80BwZqd7j9QbFDPX1nAl3yp6cs
10	38252143	39060663	29	-0.518	808521	http://genome.ucsc.edu/cgi-bin/hgTracks?db=hg19&position=chr10:38202143-39110663&hgsid=443362677_4V80BwZqd7j9QbFDPX1nAl3yp6cs
10	42700411	55218620	339	-0.4452	12518210	http://genome.ucsc.edu/cgi-bin/hgTracks?db=hg19&position=chr10:42650411-55268620&hgsid=443362677_4V80BwZqd7j9QbFDPX1nAl3yp6cs
10	55219602	58619633	94	-1.1845	3400032	http://genome.ucsc.edu/cgi-bin/hgTracks?db=hg19&position=chr10:55169602-58669633&hgsid=443362677_4V80BwZqd7j9QbFDPX1nAl3yp6cs
10	58710820	64231049	152	-0.3589	5520230	http://genome.ucsc.edu/cgi-bin/hgTracks?db=hg19&position=chr10:58660820-64281049&hgsid=443362677_4V80BwZqd7j9QbFDPX1nAl3yp6cs
10	64245215	64536269	9	-1.9192	291055	http://genome.ucsc.edu/cgi-bin/hgTracks?db=hg19&position=chr10:64195215-64586269&hgsid=443362677_4V80BwZqd7j9QbFDPX1nAl3yp6cs
10	64562701	65588259	64	-0.3022	1025559	http://genome.ucsc.edu/cgi-bin/hgTracks?db=hg19&position=chr10:64512701-65638259&hgsid=443362677_4V80BwZqd7j9QbFDPX1nAl3yp6cs
10	65594837	69578506	106	-1.2448	3983670	http://genome.ucsc.edu/cgi-bin/hgTracks?db=hg19&position=chr10:65544837-69628506&hgsid=443362677_4V80BwZqd7j9QbFDPX1nAl3yp6cs
10	69579015	82933005	838	-0.2699	13353991	http://genome.ucsc.edu/cgi-bin/hgTracks?db=hg19&position=chr10:69529015-82983005&hgsid=443362677_4V80BwZqd7j9QbFDPX1nAl3yp6cs
10	82934271	85592069	68	-1.4111	2657799	http://genome.ucsc.edu/cgi-bin/hgTracks?db=hg19&position=chr10:82884271-85642069&hgsid=443362677_4V80BwZqd7j9QbFDPX1nAl3yp6cs
10	85601611	86687060	42	-0.3733	1085450	http://genome.ucsc.edu/cgi-bin/hgTracks?db=hg19&position=chr10:85551611-86737060&hgsid=443362677_4V80BwZqd7j9QbFDPX1nAl3yp6cs
10	86742047	87918743	26	-1.4374	1176697	http://genome.ucsc.edu/cgi-bin/hgTracks?db=hg19&position=chr10:86692047-87968743&hgsid=443362677_4V80BwZqd7j9QbFDPX1nAl3yp6cs
10	87935559	100316894	639	-0.2941	12381336	http://genome.ucsc.edu/cgi-bin/hgTracks?db=hg19&position=chr10:87885559-100366894&hgsid=443362677_4V80BwZqd7j9QbFDPX1nAl3yp6cs
10	100322396	101268932	31	-1.3413	946537	http://genome.ucsc.edu/cgi-bin/hgTracks?db=hg19&position=chr10:100272396-101318932&hgsid=443362677_4V80BwZqd7j9QbFDPX1nAl3yp6cs
10	101335907	106098759	418	-0.2391	4762853	http://genome.ucsc.edu/cgi-bin/hgTracks?db=hg19&position=chr10:101285907-106148759&hgsid=443362677_4V80BwZqd7j9QbFDPX1nAl3yp6cs
10	106164460	111487901	143	-1.2957	5323442	http://genome.ucsc.edu/cgi-bin/hgTracks?db=hg19&position=chr10:106114460-111537901&hgsid=443362677_4V80BwZqd7j9QbFDPX1nAl3yp6cs
10	111490009	116756818	224	-0.1875	5266810	http://genome.ucsc.edu/cgi-bin/hgTracks?db=hg19&position=chr10:111440009-116806818&hgsid=443362677_4V80BwZqd7j9QbFDPX1nAl3yp6cs
10	116776126	118303414	57	-1.3443	1527289	http://genome.ucsc.edu/cgi-bin/hgTracks?db=hg19&position=chr10:116726126-118353414&hgsid=443362677_4V80BwZqd7j9QbFDPX1nAl3yp6cs
10	118307162	135450221	685	-0.3403	17143060	http://genome.ucsc.edu/cgi-bin/hgTracks?db=hg19&position=chr10:118257162-135500221&hgsid=443362677_4V80BwZqd7j9QbFDPX1nAl3yp6cs
11	162894	6714368	327	-0.3333	6551475	http://genome.ucsc.edu/cgi-bin/hgTracks?db=hg19&position=chr11:112894-6764368&hgsid=443362677_4V80BwZqd7j9QbFDPX1nAl3yp6cs
11	6721662	8555746	50	-1.8287	1834085	http://genome.ucsc.edu/cgi-bin/hgTracks?db=hg19&position=chr11:6671662-8605746&hgsid=443362677_4V80BwZqd7j9QbFDPX1nAl3yp6cs
11	8568854	11013744	205	-0.2273	2444891	http://genome.ucsc.edu/cgi-bin/hgTracks?db=hg19&position=chr11:8518854-11063744&hgsid=443362677_4V80BwZqd7j9QbFDPX1nAl3yp6cs
11	11034619	11748157	13	-1.9702	713539	http://genome.ucsc.edu/cgi-bin/hgTracks?db=hg19&position=chr11:10984619-11798157&hgsid=443362677_4V80BwZqd7j9QbFDPX1nAl3yp6cs
11	11807293	20204193	299	-0.1921	8396901	http://genome.ucsc.edu/cgi-bin/hgTracks?db=hg19&position=chr11:11757293-20254193&hgsid=443362677_4V80BwZqd7j9QbFDPX1nAl3yp6cs
11	20208181	26874078	152	-1.0037	6665898	http://genome.ucsc.edu/cgi-bin/hgTracks?db=hg19&position=chr11:20158181-26924078&hgsid=443362677_4V80BwZqd7j9QbFDPX1nAl3yp6cs
11	26894817	28375396	46	-0.269	1480580	http://genome.ucsc.edu/cgi-bin/hgTracks?db=hg19&position=chr11:26844817-28425396&hgsid=443362677_4V80BwZqd7j9QbFDPX1nAl3yp6cs
11	28617739	32583240	117	-1.2147	3965502	http://genome.ucsc.edu/cgi-bin/hgTracks?db=hg19&position=chr11:28567739-32633240&hgsid=443362677_4V80BwZqd7j9QbFDPX1nAl3yp6cs
11	32591770	35843392	151	-0.1953	3251623	http://genome.ucsc.edu/cgi-bin/hgTracks?db=hg19&position=chr11:32541770-35893392&hgsid=443362677_4V80BwZqd7j9QbFDPX1nAl3yp6cs
11	35857441	43305456	218	-0.9657	7448016	http://genome.ucsc.edu/cgi-bin/hgTracks?db=hg19&position=chr11:35807441-43355456&hgsid=443362677_4V80BwZqd7j9QbFDPX1nAl3yp6cs
11	43322004	49192091	409	-0.3354	5870088	http://genome.ucsc.edu/cgi-bin/hgTracks?db=hg19&position=chr11:43272004-49242091&hgsid=443362677_4V80BwZqd7j9QbFDPX1nAl3yp6cs
11	49202752	50181223	26	-1.4349	978472	http://genome.ucsc.edu/cgi-bin/hgTracks?db=hg19&position=chr11:49152752-50231223&hgsid=443362677_4V80BwZqd7j9QbFDPX1nAl3yp6cs
11	50188277	51476568	12	-0.6024	1288292	http://genome.ucsc.edu/cgi-bin/hgTracks?db=hg19&position=chr11:50138277-51526568&hgsid=443362677_4V80BwZqd7j9QbFDPX1nAl3yp6cs
11	55078389	57147797	45	-1.3689	2069409	http://genome.ucsc.edu/cgi-bin/hgTracks?db=hg19&position=chr11:55028389-57197797&hgsid=443362677_4V80BwZqd7j9QbFDPX1nAl3yp6cs
11	57149378	60008589	153	-0.4999	2859212	http://genome.ucsc.edu/cgi-bin/hgTracks?db=hg19&position=chr11:57099378-60058589&hgsid=443362677_4V80BwZqd7j9QbFDPX1nAl3yp6cs
11	60067038	60178411	7	-1.5407	111374	http://genome.ucsc.edu/cgi-bin/hgTracks?db=hg19&position=chr11:60017038-60228411&hgsid=443362677_4V80BwZqd7j9QbFDPX1nAl3yp6cs
11	60257954	62702730	240	-0.3638	2444777	http://genome.ucsc.edu/cgi-bin/hgTracks?db=hg19&position=chr11:60207954-62752730&hgsid=443362677_4V80BwZqd7j9QbFDPX1nAl3yp6cs
11	62707851	63067667	15	-1.6575	359817	http://genome.ucsc.edu/cgi-bin/hgTracks?db=hg19&position=chr11:62657851-63117667&hgsid=443362677_4V80BwZqd7j9QbFDPX1nAl3yp6cs
11	63151445	78404984	1163	-0.241	15253540	http://genome.ucsc.edu/cgi-bin/hgTracks?db=hg19&position=chr11:63101445-78454984&hgsid=443362677_4V80BwZqd7j9QbFDPX1nAl3yp6cs
11	78472377	79809485	29	-1.1005	1337109	http://genome.ucsc.edu/cgi-bin/hgTracks?db=hg19&position=chr11:78422377-79859485&hgsid=443362677_4V80BwZqd7j9QbFDPX1nAl3yp6cs
11	79883260	80999378	18	0.0965	1116119	http://genome.ucsc.edu/cgi-bin/hgTracks?db=hg19&position=chr11:79833260-81049378&hgsid=443362677_4V80BwZqd7j9QbFDPX1nAl3yp6cs
11	81002831	85270288	110	-1.057	4267458	http://genome.ucsc.edu/cgi-bin/hgTracks?db=hg19&position=chr11:80952831-85320288&hgsid=443362677_4V80BwZqd7j9QbFDPX1nAl3yp6cs
11	85316946	85616577	11	0.2195	299632	http://genome.ucsc.edu/cgi-bin/hgTracks?db=hg19&position=chr11:85266946-85666577&hgsid=443362677_4V80BwZqd7j9QbFDPX1nAl3yp6cs
11	85620758	85645226	4	-1.6767	24469	http://genome.ucsc.edu/cgi-bin/hgTracks?db=hg19&position=chr11:85570758-85695226&hgsid=443362677_4V80BwZqd7j9QbFDPX1nAl3yp6cs
11	85648632	86404540	35	-0.0739	755909	http://genome.ucsc.edu/cgi-bin/hgTracks?db=hg19&position=chr11:85598632-86454540&hgsid=443362677_4V80BwZqd7j9QbFDPX1nAl3yp6cs
11	86428373	86741420	15	-1.2155	313048	http://genome.ucsc.edu/cgi-bin/hgTracks?db=hg19&position=chr11:86378373-86791420&hgsid=443362677_4V80BwZqd7j9QbFDPX1nAl3yp6cs
11	86756164	87127252	23	-0.0473	371089	http://genome.ucsc.edu/cgi-bin/hgTracks?db=hg19&position=chr11:86706164-87177252&hgsid=443362677_4V80BwZqd7j9QbFDPX1nAl3yp6cs
11	87130158	92167106	110	-0.9941	5036949	http://genome.ucsc.edu/cgi-bin/hgTracks?db=hg19&position=chr11:87080158-92217106&hgsid=443362677_4V80BwZqd7j9QbFDPX1nAl3yp6cs
11	92344666	92496249	8	-2.6508	151584	http://genome.ucsc.edu/cgi-bin/hgTracks?db=hg19&position=chr11:92294666-92546249&hgsid=443362677_4V80BwZqd7j9QbFDPX1nAl3yp6cs
11	92500339	93169086	22	-1.1056	668748	http://genome.ucsc.edu/cgi-bin/hgTracks?db=hg19&position=chr11:92450339-93219086&hgsid=443362677_4V80BwZqd7j9QbFDPX1nAl3yp6cs
11	93202145	94717955	43	-0.1076	1515811	http://genome.ucsc.edu/cgi-bin/hgTracks?db=hg19&position=chr11:93152145-94767955&hgsid=443362677_4V80BwZqd7j9QbFDPX1nAl3yp6cs
11	94733252	95403200	12	-1.7255	669949	http://genome.ucsc.edu/cgi-bin/hgTracks?db=hg19&position=chr11:94683252-95453200&hgsid=443362677_4V80BwZqd7j9QbFDPX1nAl3yp6cs
11	95435405	96156735	40	-0.1018	721331	http://genome.ucsc.edu/cgi-bin/hgTracks?db=hg19&position=chr11:95385405-96206735&hgsid=443362677_4V80BwZqd7j9QbFDPX1nAl3yp6cs
11	96219901	100314967	119	-1.3403	4095067	http://genome.ucsc.edu/cgi-bin/hgTracks?db=hg19&position=chr11:96169901-100364967&hgsid=443362677_4V80BwZqd7j9QbFDPX1nAl3yp6cs
11	100339676	100679229	19	0.0595	339554	http://genome.ucsc.edu/cgi-bin/hgTracks?db=hg19&position=chr11:100289676-100729229&hgsid=443362677_4V80BwZqd7j9QbFDPX1nAl3yp6cs
11	100873896	101590751	18	-1.3376	716856	http://genome.ucsc.edu/cgi-bin/hgTracks?db=hg19&position=chr11:100823896-101640751&hgsid=443362677_4V80BwZqd7j9QbFDPX1nAl3yp6cs
11	101721235	102973017	63	-0.2464	1251783	http://genome.ucsc.edu/cgi-bin/hgTracks?db=hg19&position=chr11:101671235-103023017&hgsid=443362677_4V80BwZqd7j9QbFDPX1nAl3yp6cs
11	102981647	107584408	119	-1.1401	4602762	http://genome.ucsc.edu/cgi-bin/hgTracks?db=hg19&position=chr11:102931647-107634408&hgsid=443362677_4V80BwZqd7j9QbFDPX1nAl3yp6cs
11	107588613	108834470	92	-0.2189	1245858	http://genome.ucsc.edu/cgi-bin/hgTracks?db=hg19&position=chr11:107538613-108884470&hgsid=443362677_4V80BwZqd7j9QbFDPX1nAl3yp6cs
11	108877100	111380729	82	-1.3553	2503630	http://genome.ucsc.edu/cgi-bin/hgTracks?db=hg19&position=chr11:108827100-111430729&hgsid=443362677_4V80BwZqd7j9QbFDPX1nAl3yp6cs
11	111424268	112156212	64	-0.0098	731945	http://genome.ucsc.edu/cgi-bin/hgTracks?db=hg19&position=chr11:111374268-112206212&hgsid=443362677_4V80BwZqd7j9QbFDPX1nAl3yp6cs
11	112173786	113459324	22	-1.0652	1285539	http://genome.ucsc.edu/cgi-bin/hgTracks?db=hg19&position=chr11:112123786-113509324&hgsid=443362677_4V80BwZqd7j9QbFDPX1nAl3yp6cs
11	113482089	113752292	26	0.1604	270204	http://genome.ucsc.edu/cgi-bin/hgTracks?db=hg19&position=chr11:113432089-113802292&hgsid=443362677_4V80BwZqd7j9QbFDPX1nAl3yp6cs
11	113759363	116430107	83	-1.1446	2670745	http://genome.ucsc.edu/cgi-bin/hgTracks?db=hg19&position=chr11:113709363-116480107&hgsid=443362677_4V80BwZqd7j9QbFDPX1nAl3yp6cs
11	116451546	117243224	71	-0.1353	791679	http://genome.ucsc.edu/cgi-bin/hgTracks?db=hg19&position=chr11:116401546-117293224&hgsid=443362677_4V80BwZqd7j9QbFDPX1nAl3yp6cs
11	117294395	117344136	5	-2.4415	49742	http://genome.ucsc.edu/cgi-bin/hgTracks?db=hg19&position=chr11:117244395-117394136&hgsid=443362677_4V80BwZqd7j9QbFDPX1nAl3yp6cs
11	117345562	121470177	230	-0.3362	4124616	http://genome.ucsc.edu/cgi-bin/hgTracks?db=hg19&position=chr11:117295562-121520177&hgsid=443362677_4V80BwZqd7j9QbFDPX1nAl3yp6cs
11	121662066	122448509	25	-1.7946	786444	http://genome.ucsc.edu/cgi-bin/hgTracks?db=hg19&position=chr11:121612066-122498509&hgsid=443362677_4V80BwZqd7j9QbFDPX1nAl3yp6cs
11	122478965	122895842	48	-0.8655	416878	http://genome.ucsc.edu/cgi-bin/hgTracks?db=hg19&position=chr11:122428965-122945842&hgsid=443362677_4V80BwZqd7j9QbFDPX1nAl3yp6cs
11	122903105	122976617	17	0.1077	73513	http://genome.ucsc.edu/cgi-bin/hgTracks?db=hg19&position=chr11:122853105-123026617&hgsid=443362677_4V80BwZqd7j9QbFDPX1nAl3yp6cs
11	122977652	124464273	67	-1.2024	1486622	http://genome.ucsc.edu/cgi-bin/hgTracks?db=hg19&position=chr11:122927652-124514273&hgsid=443362677_4V80BwZqd7j9QbFDPX1nAl3yp6cs
11	124475220	125286123	25	-0.3518	810904	http://genome.ucsc.edu/cgi-bin/hgTracks?db=hg19&position=chr11:124425220-125336123&hgsid=443362677_4V80BwZqd7j9QbFDPX1nAl3yp6cs
11	125304618	125437604	8	-1.8086	132987	http://genome.ucsc.edu/cgi-bin/hgTracks?db=hg19&position=chr11:125254618-125487604&hgsid=443362677_4V80BwZqd7j9QbFDPX1nAl3yp6cs
11	125447080	126299957	60	-0.1615	852878	http://genome.ucsc.edu/cgi-bin/hgTracks?db=hg19&position=chr11:125397080-126349957&hgsid=443362677_4V80BwZqd7j9QbFDPX1nAl3yp6cs
11	126315967	128754501	54	-1.1411	2438535	http://genome.ucsc.edu/cgi-bin/hgTracks?db=hg19&position=chr11:126265967-128804501&hgsid=443362677_4V80BwZqd7j9QbFDPX1nAl3yp6cs
11	128832145	130927326	99	-0.2589	2095182	http://genome.ucsc.edu/cgi-bin/hgTracks?db=hg19&position=chr11:128782145-130977326&hgsid=443362677_4V80BwZqd7j9QbFDPX1nAl3yp6cs
11	130975825	133763705	73	-1.3465	2787881	http://genome.ucsc.edu/cgi-bin/hgTracks?db=hg19&position=chr11:130925825-133813705&hgsid=443362677_4V80BwZqd7j9QbFDPX1nAl3yp6cs
11	133922021	134939114	27	-0.2846	1017094	http://genome.ucsc.edu/cgi-bin/hgTracks?db=hg19&position=chr11:133872021-134989114&hgsid=443362677_4V80BwZqd7j9QbFDPX1nAl3yp6cs
12	164714	19951463	1139	-0.4016	19786750	http://genome.ucsc.edu/cgi-bin/hgTracks?db=hg19&position=chr12:114714-20001463&hgsid=443362677_4V80BwZqd7j9QbFDPX1nAl3yp6cs
12	19993094	26258478	214	-1.2259	6265385	http://genome.ucsc.edu/cgi-bin/hgTracks?db=hg19&position=chr12:19943094-26308478&hgsid=443362677_4V80BwZqd7j9QbFDPX1nAl3yp6cs
12	26264337	29573543	123	-0.0796	3309207	http://genome.ucsc.edu/cgi-bin/hgTracks?db=hg19&position=chr12:26214337-29623543&hgsid=443362677_4V80BwZqd7j9QbFDPX1nAl3yp6cs
12	29661599	30374656	21	-1.4023	713058	http://genome.ucsc.edu/cgi-bin/hgTracks?db=hg19&position=chr12:29611599-30424656&hgsid=443362677_4V80BwZqd7j9QbFDPX1nAl3yp6cs
12	30398201	33064466	248	-0.1968	2666266	http://genome.ucsc.edu/cgi-bin/hgTracks?db=hg19&position=chr12:30348201-33114466&hgsid=443362677_4V80BwZqd7j9QbFDPX1nAl3yp6cs
12	33065772	34409543	40	-1.1431	1343772	http://genome.ucsc.edu/cgi-bin/hgTracks?db=hg19&position=chr12:33015772-34459543&hgsid=443362677_4V80BwZqd7j9QbFDPX1nAl3yp6cs
12	37908243	42363469	106	-1.0876	4455227	http://genome.ucsc.edu/cgi-bin/hgTracks?db=hg19&position=chr12:37858243-42413469&hgsid=443362677_4V80BwZqd7j9QbFDPX1nAl3yp6cs
12	42519968	44981858	111	-0.4937	2461891	http://genome.ucsc.edu/cgi-bin/hgTracks?db=hg19&position=chr12:42469968-45031858&hgsid=443362677_4V80BwZqd7j9QbFDPX1nAl3yp6cs
12	45098726	45469294	12	-1.7813	370569	http://genome.ucsc.edu/cgi-bin/hgTracks?db=hg19&position=chr12:45048726-45519294&hgsid=443362677_4V80BwZqd7j9QbFDPX1nAl3yp6cs
12	45511865	54755247	760	-0.2262	9243383	http://genome.ucsc.edu/cgi-bin/hgTracks?db=hg19&position=chr12:45461865-54805247&hgsid=443362677_4V80BwZqd7j9QbFDPX1nAl3yp6cs
12	54759296	56039859	42	-1.2695	1280564	http://genome.ucsc.edu/cgi-bin/hgTracks?db=hg19&position=chr12:54709296-56089859&hgsid=443362677_4V80BwZqd7j9QbFDPX1nAl3yp6cs
12	56047444	58252192	272	-0.1874	2204749	http://genome.ucsc.edu/cgi-bin/hgTracks?db=hg19&position=chr12:55997444-58302192&hgsid=443362677_4V80BwZqd7j9QbFDPX1nAl3yp6cs
12	58259907	62614809	95	-1.0004	4354903	http://genome.ucsc.edu/cgi-bin/hgTracks?db=hg19&position=chr12:58209907-62664809&hgsid=443362677_4V80BwZqd7j9QbFDPX1nAl3yp6cs
12	62630138	66573986	180	-0.236	3943849	http://genome.ucsc.edu/cgi-bin/hgTracks?db=hg19&position=chr12:62580138-66623986&hgsid=443362677_4V80BwZqd7j9QbFDPX1nAl3yp6cs
12	66589532	69330256	109	-0.9886	2740725	http://genome.ucsc.edu/cgi-bin/hgTracks?db=hg19&position=chr12:66539532-69380256&hgsid=443362677_4V80BwZqd7j9QbFDPX1nAl3yp6cs
12	69463203	72362987	130	-0.1115	2899785	http://genome.ucsc.edu/cgi-bin/hgTracks?db=hg19&position=chr12:69413203-72412987&hgsid=443362677_4V80BwZqd7j9QbFDPX1nAl3yp6cs
12	72381556	74425250	32	-1.6098	2043695	http://genome.ucsc.edu/cgi-bin/hgTracks?db=hg19&position=chr12:72331556-74475250&hgsid=443362677_4V80BwZqd7j9QbFDPX1nAl3yp6cs
12	74583779	80396394	211	-0.4893	5812616	http://genome.ucsc.edu/cgi-bin/hgTracks?db=hg19&position=chr12:74533779-80446394&hgsid=443362677_4V80BwZqd7j9QbFDPX1nAl3yp6cs
12	80448168	82695755	55	-1.2347	2247588	http://genome.ucsc.edu/cgi-bin/hgTracks?db=hg19&position=chr12:80398168-82745755&hgsid=443362677_4V80BwZqd7j9QbFDPX1nAl3yp6cs
12	82716497	83571077	33	0.0205	854581	http://genome.ucsc.edu/cgi-bin/hgTracks?db=hg19&position=chr12:82666497-83621077&hgsid=443362677_4V80BwZqd7j9QbFDPX1nAl3yp6cs
12	83574907	88454261	109	-0.9422	4879355	http://genome.ucsc.edu/cgi-bin/hgTracks?db=hg19&position=chr12:83524907-88504261&hgsid=443362677_4V80BwZqd7j9QbFDPX1nAl3yp6cs
12	88481421	96933973	413	-0.3019	8452553	http://genome.ucsc.edu/cgi-bin/hgTracks?db=hg19&position=chr12:88431421-96983973&hgsid=443362677_4V80BwZqd7j9QbFDPX1nAl3yp6cs
12	96941056	98836820	52	-1.1981	1895765	http://genome.ucsc.edu/cgi-bin/hgTracks?db=hg19&position=chr12:96891056-98886820&hgsid=443362677_4V80BwZqd7j9QbFDPX1nAl3yp6cs
12	98853470	111387521	681	-0.4682	12534052	http://genome.ucsc.edu/cgi-bin/hgTracks?db=hg19&position=chr12:98803470-111437521&hgsid=443362677_4V80BwZqd7j9QbFDPX1nAl3yp6cs
12	111407264	111762397	11	-2.0649	355134	http://genome.ucsc.edu/cgi-bin/hgTracks?db=hg19&position=chr12:111357264-111812397&hgsid=443362677_4V80BwZqd7j9QbFDPX1nAl3yp6cs
12	111771587	113072076	165	-0.3488	1300490	http://genome.ucsc.edu/cgi-bin/hgTracks?db=hg19&position=chr12:111721587-113122076&hgsid=443362677_4V80BwZqd7j9QbFDPX1nAl3yp6cs
12	113086716	113519058	16	-1.5478	432343	http://genome.ucsc.edu/cgi-bin/hgTracks?db=hg19&position=chr12:113036716-113569058&hgsid=443362677_4V80BwZqd7j9QbFDPX1nAl3yp6cs
12	113541335	118940345	317	-0.3414	5399011	http://genome.ucsc.edu/cgi-bin/hgTracks?db=hg19&position=chr12:113491335-118990345&hgsid=443362677_4V80BwZqd7j9QbFDPX1nAl3yp6cs
12	118972591	120002899	48	-1.3743	1030309	http://genome.ucsc.edu/cgi-bin/hgTracks?db=hg19&position=chr12:118922591-120052899&hgsid=443362677_4V80BwZqd7j9QbFDPX1nAl3yp6cs
12	120011861	125594658	746	-0.2621	5582798	http://genome.ucsc.edu/cgi-bin/hgTracks?db=hg19&position=chr12:119961861-125644658&hgsid=443362677_4V80BwZqd7j9QbFDPX1nAl3yp6cs
12	125653114	130803515	229	-1.0986	5150402	http://genome.ucsc.edu/cgi-bin/hgTracks?db=hg19&position=chr12:125603114-130853515&hgsid=443362677_4V80BwZqd7j9QbFDPX1nAl3yp6cs
12	130833369	133813968	218	-0.4807	2980600	http://genome.ucsc.edu/cgi-bin/hgTracks?db=hg19&position=chr12:130783369-133863968&hgsid=443362677_4V80BwZqd7j9QbFDPX1nAl3yp6cs
13	19138503	19300271	6	-0.8579	161769	http://genome.ucsc.edu/cgi-bin/hgTracks?db=hg19&position=chr13:19088503-19350271&hgsid=443362677_4V80BwZqd7j9QbFDPX1nAl3yp6cs
13	19390397	19708278	10	-2.277	317882	http://genome.ucsc.edu/cgi-bin/hgTracks?db=hg19&position=chr13:19340397-19758278&hgsid=443362677_4V80BwZqd7j9QbFDPX1nAl3yp6cs
13	19754734	22346979	237	-0.5028	2592246	http://genome.ucsc.edu/cgi-bin/hgTracks?db=hg19&position=chr13:19704734-22396979&hgsid=443362677_4V80BwZqd7j9QbFDPX1nAl3yp6cs
13	22363457	24062087	98	-1.5345	1698631	http://genome.ucsc.edu/cgi-bin/hgTracks?db=hg19&position=chr13:22313457-24112087&hgsid=443362677_4V80BwZqd7j9QbFDPX1nAl3yp6cs
13	24072343	34772666	521	-0.7463	10700324	http://genome.ucsc.edu/cgi-bin/hgTracks?db=hg19&position=chr13:24022343-34822666&hgsid=443362677_4V80BwZqd7j9QbFDPX1nAl3yp6cs
13	34812713	40648205	182	-1.4888	5835493	http://genome.ucsc.edu/cgi-bin/hgTracks?db=hg19&position=chr13:34762713-40698205&hgsid=443362677_4V80BwZqd7j9QbFDPX1nAl3yp6cs
13	40715629	53325792	570	-0.5072	12610164	http://genome.ucsc.edu/cgi-bin/hgTracks?db=hg19&position=chr13:40665629-53375792&hgsid=443362677_4V80BwZqd7j9QbFDPX1nAl3yp6cs
13	53327321	60130463	185	-1.7491	6803143	http://genome.ucsc.edu/cgi-bin/hgTracks?db=hg19&position=chr13:53277321-60180463&hgsid=443362677_4V80BwZqd7j9QbFDPX1nAl3yp6cs
13	60244809	61148588	30	-0.3113	903780	http://genome.ucsc.edu/cgi-bin/hgTracks?db=hg19&position=chr13:60194809-61198588&hgsid=443362677_4V80BwZqd7j9QbFDPX1nAl3yp6cs
13	61154005	71176996	271	-1.749	10022992	http://genome.ucsc.edu/cgi-bin/hgTracks?db=hg19&position=chr13:61104005-71226996&hgsid=443362677_4V80BwZqd7j9QbFDPX1nAl3yp6cs
13	71184727	72380032	32	-0.471	1195306	http://genome.ucsc.edu/cgi-bin/hgTracks?db=hg19&position=chr13:71134727-72430032&hgsid=443362677_4V80BwZqd7j9QbFDPX1nAl3yp6cs
13	72390141	73106723	12	-1.9767	716583	http://genome.ucsc.edu/cgi-bin/hgTracks?db=hg19&position=chr13:72340141-73156723&hgsid=443362677_4V80BwZqd7j9QbFDPX1nAl3yp6cs
13	73133786	74723044	76	-0.2228	1589259	http://genome.ucsc.edu/cgi-bin/hgTracks?db=hg19&position=chr13:73083786-74773044&hgsid=443362677_4V80BwZqd7j9QbFDPX1nAl3yp6cs
13	74729591	75792898	22	-1.3844	1063308	http://genome.ucsc.edu/cgi-bin/hgTracks?db=hg19&position=chr13:74679591-75842898&hgsid=443362677_4V80BwZqd7j9QbFDPX1nAl3yp6cs
13	75799317	76443052	27	0.0524	643736	http://genome.ucsc.edu/cgi-bin/hgTracks?db=hg19&position=chr13:75749317-76493052&hgsid=443362677_4V80BwZqd7j9QbFDPX1nAl3yp6cs
13	76458201	79941466	103	-1.1786	3483266	http://genome.ucsc.edu/cgi-bin/hgTracks?db=hg19&position=chr13:76408201-79991466&hgsid=443362677_4V80BwZqd7j9QbFDPX1nAl3yp6cs
13	79971741	81005917	53	-0.0741	1034177	http://genome.ucsc.edu/cgi-bin/hgTracks?db=hg19&position=chr13:79921741-81055917&hgsid=443362677_4V80BwZqd7j9QbFDPX1nAl3yp6cs
13	81013220	98971798	583	-1.587	17958579	http://genome.ucsc.edu/cgi-bin/hgTracks?db=hg19&position=chr13:80963220-99021798&hgsid=443362677_4V80BwZqd7j9QbFDPX1nAl3yp6cs
13	98995202	101307368	141	-0.2376	2312167	http://genome.ucsc.edu/cgi-bin/hgTracks?db=hg19&position=chr13:98945202-101357368&hgsid=443362677_4V80BwZqd7j9QbFDPX1nAl3yp6cs
13	101337019	103193715	50	-1.5916	1856697	http://genome.ucsc.edu/cgi-bin/hgTracks?db=hg19&position=chr13:101287019-103243715&hgsid=443362677_4V80BwZqd7j9QbFDPX1nAl3yp6cs
13	103247246	103526964	18	0.0702	279719	http://genome.ucsc.edu/cgi-bin/hgTracks?db=hg19&position=chr13:103197246-103576964&hgsid=443362677_4V80BwZqd7j9QbFDPX1nAl3yp6cs
13	103604951	106088754	56	-1.6225	2483804	http://genome.ucsc.edu/cgi-bin/hgTracks?db=hg19&position=chr13:103554951-106138754&hgsid=443362677_4V80BwZqd7j9QbFDPX1nAl3yp6cs
13	106097438	107201189	35	-0.3165	1103752	http://genome.ucsc.edu/cgi-bin/hgTracks?db=hg19&position=chr13:106047438-107251189&hgsid=443362677_4V80BwZqd7j9QbFDPX1nAl3yp6cs
13	107345606	109284350	64	-1.2991	1938745	http://genome.ucsc.edu/cgi-bin/hgTracks?db=hg19&position=chr13:107295606-109334350&hgsid=443362677_4V80BwZqd7j9QbFDPX1nAl3yp6cs
13	109347384	110541064	37	-0.1902	1193681	http://genome.ucsc.edu/cgi-bin/hgTracks?db=hg19&position=chr13:109297384-110591064&hgsid=443362677_4V80BwZqd7j9QbFDPX1nAl3yp6cs
13	110569034	111157045	15	-1.5661	588012	http://genome.ucsc.edu/cgi-bin/hgTracks?db=hg19&position=chr13:110519034-111207045&hgsid=443362677_4V80BwZqd7j9QbFDPX1nAl3yp6cs
13	111165766	112002447	31	-0.3437	836682	http://genome.ucsc.edu/cgi-bin/hgTracks?db=hg19&position=chr13:111115766-112052447&hgsid=443362677_4V80BwZqd7j9QbFDPX1nAl3yp6cs
13	112044606	113059389	15	-1.7923	1014784	http://genome.ucsc.edu/cgi-bin/hgTracks?db=hg19&position=chr13:111994606-113109389&hgsid=443362677_4V80BwZqd7j9QbFDPX1nAl3yp6cs
13	113130803	115098018	90	-0.4567	1967216	http://genome.ucsc.edu/cgi-bin/hgTracks?db=hg19&position=chr13:113080803-115148018&hgsid=443362677_4V80BwZqd7j9QbFDPX1nAl3yp6cs
14	19073224	25772203	363	-0.185	6698980	http://genome.ucsc.edu/cgi-bin/hgTracks?db=hg19&position=chr14:19023224-25822203&hgsid=443362677_4V80BwZqd7j9QbFDPX1nAl3yp6cs
14	25773800	31027211	125	-0.8108	5253412	http://genome.ucsc.edu/cgi-bin/hgTracks?db=hg19&position=chr14:25723800-31077211&hgsid=443362677_4V80BwZqd7j9QbFDPX1nAl3yp6cs
14	31050832	32922895	133	-0.0287	1872064	http://genome.ucsc.edu/cgi-bin/hgTracks?db=hg19&position=chr14:31000832-32972895&hgsid=443362677_4V80BwZqd7j9QbFDPX1nAl3yp6cs
14	32975273	34290260	31	-0.9065	1314988	http://genome.ucsc.edu/cgi-bin/hgTracks?db=hg19&position=chr14:32925273-34340260&hgsid=443362677_4V80BwZqd7j9QbFDPX1nAl3yp6cs
14	34319874	36771622	230	-0.1163	2451749	http://genome.ucsc.edu/cgi-bin/hgTracks?db=hg19&position=chr14:34269874-36821622&hgsid=443362677_4V80BwZqd7j9QbFDPX1nAl3yp6cs
14	36812058	39409622	69	-0.9487	2597565	http://genome.ucsc.edu/cgi-bin/hgTracks?db=hg19&position=chr14:36762058-39459622&hgsid=443362677_4V80BwZqd7j9QbFDPX1nAl3yp6cs
14	39482183	39912380	48	-0.0414	430198	http://genome.ucsc.edu/cgi-bin/hgTracks?db=hg19&position=chr14:39432183-39962380&hgsid=443362677_4V80BwZqd7j9QbFDPX1nAl3yp6cs
14	39930956	43567663	68	-1.2364	3636708	http://genome.ucsc.edu/cgi-bin/hgTracks?db=hg19&position=chr14:39880956-43617663&hgsid=443362677_4V80BwZqd7j9QbFDPX1nAl3yp6cs
14	43757520	45795698	65	-0.5657	2038179	http://genome.ucsc.edu/cgi-bin/hgTracks?db=hg19&position=chr14:43707520-45845698&hgsid=443362677_4V80BwZqd7j9QbFDPX1nAl3yp6cs
14	45802927	49958546	85	-1.3901	4155620	http://genome.ucsc.edu/cgi-bin/hgTracks?db=hg19&position=chr14:45752927-50008546&hgsid=443362677_4V80BwZqd7j9QbFDPX1nAl3yp6cs
14	49970033	51412682	145	-0.2107	1442650	http://genome.ucsc.edu/cgi-bin/hgTracks?db=hg19&position=chr14:49920033-51462682&hgsid=443362677_4V80BwZqd7j9QbFDPX1nAl3yp6cs
14	51435709	52896898	46	-1.157	1461190	http://genome.ucsc.edu/cgi-bin/hgTracks?db=hg19&position=chr14:51385709-52946898&hgsid=443362677_4V80BwZqd7j9QbFDPX1nAl3yp6cs
14	52921458	56655801	177	-0.2571	3734344	http://genome.ucsc.edu/cgi-bin/hgTracks?db=hg19&position=chr14:52871458-56705801&hgsid=443362677_4V80BwZqd7j9QbFDPX1nAl3yp6cs
14	56794085	58647943	68	-0.9749	1853859	http://genome.ucsc.edu/cgi-bin/hgTracks?db=hg19&position=chr14:56744085-58697943&hgsid=443362677_4V80BwZqd7j9QbFDPX1nAl3yp6cs
14	58669226	60751284	92	-0.2015	2082059	http://genome.ucsc.edu/cgi-bin/hgTracks?db=hg19&position=chr14:58619226-60801284&hgsid=443362677_4V80BwZqd7j9QbFDPX1nAl3yp6cs
14	60831682	61153291	9	-2.1451	321610	http://genome.ucsc.edu/cgi-bin/hgTracks?db=hg19&position=chr14:60781682-61203291&hgsid=443362677_4V80BwZqd7j9QbFDPX1nAl3yp6cs
14	61156011	62412498	52	-0.2885	1256488	http://genome.ucsc.edu/cgi-bin/hgTracks?db=hg19&position=chr14:61106011-62462498&hgsid=443362677_4V80BwZqd7j9QbFDPX1nAl3yp6cs
14	62446524	63824112	36	-1.4374	1377589	http://genome.ucsc.edu/cgi-bin/hgTracks?db=hg19&position=chr14:62396524-63874112&hgsid=443362677_4V80BwZqd7j9QbFDPX1nAl3yp6cs
14	63843775	72189545	477	-0.2325	8345771	http://genome.ucsc.edu/cgi-bin/hgTracks?db=hg19&position=chr14:63793775-72239545&hgsid=443362677_4V80BwZqd7j9QbFDPX1nAl3yp6cs
14	72213879	73197798	31	-1.5638	983920	http://genome.ucsc.edu/cgi-bin/hgTracks?db=hg19&position=chr14:72163879-73247798&hgsid=443362677_4V80BwZqd7j9QbFDPX1nAl3yp6cs
14	73231289	76888646	334	-0.3364	3657358	http://genome.ucsc.edu/cgi-bin/hgTracks?db=hg19&position=chr14:73181289-76938646&hgsid=443362677_4V80BwZqd7j9QbFDPX1nAl3yp6cs
14	76899111	77403213	35	-1.1073	504103	http://genome.ucsc.edu/cgi-bin/hgTracks?db=hg19&position=chr14:76849111-77453213&hgsid=443362677_4V80BwZqd7j9QbFDPX1nAl3yp6cs
14	77412218	78438008	98	-0.2027	1025791	http://genome.ucsc.edu/cgi-bin/hgTracks?db=hg19&position=chr14:77362218-78488008&hgsid=443362677_4V80BwZqd7j9QbFDPX1nAl3yp6cs
14	78452745	79659206	34	-1.3973	1206462	http://genome.ucsc.edu/cgi-bin/hgTracks?db=hg19&position=chr14:78402745-79709206&hgsid=443362677_4V80BwZqd7j9QbFDPX1nAl3yp6cs
14	79735485	80274504	15	-0.1723	539020	http://genome.ucsc.edu/cgi-bin/hgTracks?db=hg19&position=chr14:79685485-80324504&hgsid=443362677_4V80BwZqd7j9QbFDPX1nAl3yp6cs
14	80284489	81083667	21	-1.2794	799179	http://genome.ucsc.edu/cgi-bin/hgTracks?db=hg19&position=chr14:80234489-81133667&hgsid=443362677_4V80BwZqd7j9QbFDPX1nAl3yp6cs
14	81092732	81442348	15	-0.0667	349617	http://genome.ucsc.edu/cgi-bin/hgTracks?db=hg19&position=chr14:81042732-81492348&hgsid=443362677_4V80BwZqd7j9QbFDPX1nAl3yp6cs
14	81451518	81617365	11	-1.6636	165848	http://genome.ucsc.edu/cgi-bin/hgTracks?db=hg19&position=chr14:81401518-81667365&hgsid=443362677_4V80BwZqd7j9QbFDPX1nAl3yp6cs
14	81640934	81991142	21	-0.2067	350209	http://genome.ucsc.edu/cgi-bin/hgTracks?db=hg19&position=chr14:81590934-82041142&hgsid=443362677_4V80BwZqd7j9QbFDPX1nAl3yp6cs
14	82005427	88372809	175	-1.5399	6367383	http://genome.ucsc.edu/cgi-bin/hgTracks?db=hg19&position=chr14:81955427-88422809&hgsid=443362677_4V80BwZqd7j9QbFDPX1nAl3yp6cs
14	88393690	89999930	68	-0.4101	1606241	http://genome.ucsc.edu/cgi-bin/hgTracks?db=hg19&position=chr14:88343690-90049930&hgsid=443362677_4V80BwZqd7j9QbFDPX1nAl3yp6cs
14	90000542	90157873	15	-1.6226	157332	http://genome.ucsc.edu/cgi-bin/hgTracks?db=hg19&position=chr14:89950542-90207873&hgsid=443362677_4V80BwZqd7j9QbFDPX1nAl3yp6cs
14	90158293	90540107	23	-0.3003	381815	http://genome.ucsc.edu/cgi-bin/hgTracks?db=hg19&position=chr14:90108293-90590107&hgsid=443362677_4V80BwZqd7j9QbFDPX1nAl3yp6cs
14	90543556	90597082	6	-1.9061	53527	http://genome.ucsc.edu/cgi-bin/hgTracks?db=hg19&position=chr14:90493556-90647082&hgsid=443362677_4V80BwZqd7j9QbFDPX1nAl3yp6cs
14	90597668	93732192	248	-0.1907	3134525	http://genome.ucsc.edu/cgi-bin/hgTracks?db=hg19&position=chr14:90547668-93782192&hgsid=443362677_4V80BwZqd7j9QbFDPX1nAl3yp6cs
14	93738552	100702116	260	-0.8718	6963565	http://genome.ucsc.edu/cgi-bin/hgTracks?db=hg19&position=chr14:93688552-100752116&hgsid=443362677_4V80BwZqd7j9QbFDPX1nAl3yp6cs
14	100711366	104418670	358	-0.125	3707305	http://genome.ucsc.edu/cgi-bin/hgTracks?db=hg19&position=chr14:100661366-104468670&hgsid=443362677_4V80BwZqd7j9QbFDPX1nAl3yp6cs
14	104432206	105133251	31	-1.0385	701046	http://genome.ucsc.edu/cgi-bin/hgTracks?db=hg19&position=chr14:104382206-105183251&hgsid=443362677_4V80BwZqd7j9QbFDPX1nAl3yp6cs
14	105135956	107287357	77	-0.3806	2151402	http://genome.ucsc.edu/cgi-bin/hgTracks?db=hg19&position=chr14:105085956-107337357&hgsid=443362677_4V80BwZqd7j9QbFDPX1nAl3yp6cs
15	20046528	22504074	40	-1.2946	2457547	http://genome.ucsc.edu/cgi-bin/hgTracks?db=hg19&position=chr15:19996528-22554074&hgsid=443362677_4V80BwZqd7j9QbFDPX1nAl3yp6cs
15	22509642	23695985	109	-0.2873	1186344	http://genome.ucsc.edu/cgi-bin/hgTracks?db=hg19&position=chr15:22459642-23745985&hgsid=443362677_4V80BwZqd7j9QbFDPX1nAl3yp6cs
15	23699220	25519628	93	-1.3978	1820409	http://genome.ucsc.edu/cgi-bin/hgTracks?db=hg19&position=chr15:23649220-25569628&hgsid=443362677_4V80BwZqd7j9QbFDPX1nAl3yp6cs
15	25531025	25729516	10	0.1	198492	http://genome.ucsc.edu/cgi-bin/hgTracks?db=hg19&position=chr15:25481025-25779516&hgsid=443362677_4V80BwZqd7j9QbFDPX1nAl3yp6cs
15	25762849	28295631	97	-1.4138	2532783	http://genome.ucsc.edu/cgi-bin/hgTracks?db=hg19&position=chr15:25712849-28345631&hgsid=443362677_4V80BwZqd7j9QbFDPX1nAl3yp6cs
15	28318484	29061039	47	-0.3059	742556	http://genome.ucsc.edu/cgi-bin/hgTracks?db=hg19&position=chr15:28268484-29111039&hgsid=443362677_4V80BwZqd7j9QbFDPX1nAl3yp6cs
15	29066151	29926087	62	-1.3433	859937	http://genome.ucsc.edu/cgi-bin/hgTracks?db=hg19&position=chr15:29016151-29976087&hgsid=443362677_4V80BwZqd7j9QbFDPX1nAl3yp6cs
15	29958150	35288785	293	-0.3656	5330636	http://genome.ucsc.edu/cgi-bin/hgTracks?db=hg19&position=chr15:29908150-35338785&hgsid=443362677_4V80BwZqd7j9QbFDPX1nAl3yp6cs
15	35291641	36841216	66	-1.0632	1549576	http://genome.ucsc.edu/cgi-bin/hgTracks?db=hg19&position=chr15:35241641-36891216&hgsid=443362677_4V80BwZqd7j9QbFDPX1nAl3yp6cs
15	36859296	46003718	691	-0.2281	9144423	http://genome.ucsc.edu/cgi-bin/hgTracks?db=hg19&position=chr15:36809296-46053718&hgsid=443362677_4V80BwZqd7j9QbFDPX1nAl3yp6cs
15	46014788	48547559	60	-1.5358	2532772	http://genome.ucsc.edu/cgi-bin/hgTracks?db=hg19&position=chr15:45964788-48597559&hgsid=443362677_4V80BwZqd7j9QbFDPX1nAl3yp6cs
15	48550482	53021707	268	-0.3635	4471226	http://genome.ucsc.edu/cgi-bin/hgTracks?db=hg19&position=chr15:48500482-53071707&hgsid=443362677_4V80BwZqd7j9QbFDPX1nAl3yp6cs
15	53041071	55403542	56	-1.2923	2362472	http://genome.ucsc.edu/cgi-bin/hgTracks?db=hg19&position=chr15:52991071-55453542&hgsid=443362677_4V80BwZqd7j9QbFDPX1nAl3yp6cs
15	55414182	60999655	307	-0.3275	5585474	http://genome.ucsc.edu/cgi-bin/hgTracks?db=hg19&position=chr15:55364182-61049655&hgsid=443362677_4V80BwZqd7j9QbFDPX1nAl3yp6cs
15	61096411	61805716	22	-1.7915	709306	http://genome.ucsc.edu/cgi-bin/hgTracks?db=hg19&position=chr15:61046411-61855716&hgsid=443362677_4V80BwZqd7j9QbFDPX1nAl3yp6cs
15	61816162	80526912	1174	-0.2803	18710751	http://genome.ucsc.edu/cgi-bin/hgTracks?db=hg19&position=chr15:61766162-80576912&hgsid=443362677_4V80BwZqd7j9QbFDPX1nAl3yp6cs
15	80574219	84028958	165	-0.875	3454740	http://genome.ucsc.edu/cgi-bin/hgTracks?db=hg19&position=chr15:80524219-84078958&hgsid=443362677_4V80BwZqd7j9QbFDPX1nAl3yp6cs
15	84050065	84476132	25	-2.0643	426068	http://genome.ucsc.edu/cgi-bin/hgTracks?db=hg19&position=chr15:84000065-84526132&hgsid=443362677_4V80BwZqd7j9QbFDPX1nAl3yp6cs
15	84479583	84806520	12	-1.0283	326938	http://genome.ucsc.edu/cgi-bin/hgTracks?db=hg19&position=chr15:84429583-84856520&hgsid=443362677_4V80BwZqd7j9QbFDPX1nAl3yp6cs
15	84923393	86293522	99	-0.2167	1370130	http://genome.ucsc.edu/cgi-bin/hgTracks?db=hg19&position=chr15:84873393-86343522&hgsid=443362677_4V80BwZqd7j9QbFDPX1nAl3yp6cs
15	86328417	89596291	106	-1.1958	3267875	http://genome.ucsc.edu/cgi-bin/hgTracks?db=hg19&position=chr15:86278417-89646291&hgsid=443362677_4V80BwZqd7j9QbFDPX1nAl3yp6cs
15	89599798	91568728	206	-0.2368	1968931	http://genome.ucsc.edu/cgi-bin/hgTracks?db=hg19&position=chr15:89549798-91618728&hgsid=443362677_4V80BwZqd7j9QbFDPX1nAl3yp6cs
15	91571514	91821833	9	-1.7946	250320	http://genome.ucsc.edu/cgi-bin/hgTracks?db=hg19&position=chr15:91521514-91871833&hgsid=443362677_4V80BwZqd7j9QbFDPX1nAl3yp6cs
15	91882964	93644436	76	-0.3766	1761473	http://genome.ucsc.edu/cgi-bin/hgTracks?db=hg19&position=chr15:91832964-93694436&hgsid=443362677_4V80BwZqd7j9QbFDPX1nAl3yp6cs
15	93659228	97756478	173	-0.9043	4097251	http://genome.ucsc.edu/cgi-bin/hgTracks?db=hg19&position=chr15:93609228-97806478&hgsid=443362677_4V80BwZqd7j9QbFDPX1nAl3yp6cs
15	97762742	102471473	212	-0.4593	4708732	http://genome.ucsc.edu/cgi-bin/hgTracks?db=hg19&position=chr15:97712742-102521473&hgsid=443362677_4V80BwZqd7j9QbFDPX1nAl3yp6cs
16	72304	5018273	596	-0.2912	4945970	http://genome.ucsc.edu/cgi-bin/hgTracks?db=hg19&position=chr16:22304-5068273&hgsid=443362677_4V80BwZqd7j9QbFDPX1nAl3yp6cs
16	5023776	8218776	172	-1.4736	3195001	http://genome.ucsc.edu/cgi-bin/hgTracks?db=hg19&position=chr16:4973776-8268776&hgsid=443362677_4V80BwZqd7j9QbFDPX1nAl3yp6cs
16	8221511	12919287	353	-0.443	4697777	http://genome.ucsc.edu/cgi-bin/hgTracks?db=hg19&position=chr16:8171511-12969287&hgsid=443362677_4V80BwZqd7j9QbFDPX1nAl3yp6cs
16	12924416	14047064	58	-1.2752	1122649	http://genome.ucsc.edu/cgi-bin/hgTracks?db=hg19&position=chr16:12874416-14097064&hgsid=443362677_4V80BwZqd7j9QbFDPX1nAl3yp6cs
16	14047812	17633477	272	-0.2569	3585666	http://genome.ucsc.edu/cgi-bin/hgTracks?db=hg19&position=chr16:13997812-17683477&hgsid=443362677_4V80BwZqd7j9QbFDPX1nAl3yp6cs
16	17649948	18146234	31	-1.3088	496287	http://genome.ucsc.edu/cgi-bin/hgTracks?db=hg19&position=chr16:17599948-18196234&hgsid=443362677_4V80BwZqd7j9QbFDPX1nAl3yp6cs
16	18214291	19879313	138	-0.2586	1665023	http://genome.ucsc.edu/cgi-bin/hgTracks?db=hg19&position=chr16:18164291-19929313&hgsid=443362677_4V80BwZqd7j9QbFDPX1nAl3yp6cs
16	19917985	20801089	38	-1.1988	883105	http://genome.ucsc.edu/cgi-bin/hgTracks?db=hg19&position=chr16:19867985-20851089&hgsid=443362677_4V80BwZqd7j9QbFDPX1nAl3yp6cs
16	20816671	23776476	200	-0.2175	2959806	http://genome.ucsc.edu/cgi-bin/hgTracks?db=hg19&position=chr16:20766671-23826476&hgsid=443362677_4V80BwZqd7j9QbFDPX1nAl3yp6cs
16	23782384	24683535	55	-1.5442	901152	http://genome.ucsc.edu/cgi-bin/hgTracks?db=hg19&position=chr16:23732384-24733535&hgsid=443362677_4V80BwZqd7j9QbFDPX1nAl3yp6cs
16	24703013	25273623	64	-0.3065	570611	http://genome.ucsc.edu/cgi-bin/hgTracks?db=hg19&position=chr16:24653013-25323623&hgsid=443362677_4V80BwZqd7j9QbFDPX1nAl3yp6cs
16	25288415	27100147	74	-1.233	1811733	http://genome.ucsc.edu/cgi-bin/hgTracks?db=hg19&position=chr16:25238415-27150147&hgsid=443362677_4V80BwZqd7j9QbFDPX1nAl3yp6cs
16	27105532	31438360	446	-0.2411	4332829	http://genome.ucsc.edu/cgi-bin/hgTracks?db=hg19&position=chr16:27055532-31488360&hgsid=443362677_4V80BwZqd7j9QbFDPX1nAl3yp6cs
16	31445887	33997596	73	-0.9037	2551710	http://genome.ucsc.edu/cgi-bin/hgTracks?db=hg19&position=chr16:31395887-34047596&hgsid=443362677_4V80BwZqd7j9QbFDPX1nAl3yp6cs
16	34001687	34857691	21	-0.3336	856005	http://genome.ucsc.edu/cgi-bin/hgTracks?db=hg19&position=chr16:33951687-34907691&hgsid=443362677_4V80BwZqd7j9QbFDPX1nAl3yp6cs
16	46472193	48550124	108	-0.1504	2077932	http://genome.ucsc.edu/cgi-bin/hgTracks?db=hg19&position=chr16:46422193-48600124&hgsid=443362677_4V80BwZqd7j9QbFDPX1nAl3yp6cs
16	48550624	48769394	7	-1.2825	218771	http://genome.ucsc.edu/cgi-bin/hgTracks?db=hg19&position=chr16:48500624-48819394&hgsid=443362677_4V80BwZqd7j9QbFDPX1nAl3yp6cs
16	48812640	56000331	229	-0.4061	7187692	http://genome.ucsc.edu/cgi-bin/hgTracks?db=hg19&position=chr16:48762640-56050331&hgsid=443362677_4V80BwZqd7j9QbFDPX1nAl3yp6cs
16	56003600	56254752	10	-1.337	251153	http://genome.ucsc.edu/cgi-bin/hgTracks?db=hg19&position=chr16:55953600-56304752&hgsid=443362677_4V80BwZqd7j9QbFDPX1nAl3yp6cs
16	56349895	59292626	201	-0.0182	2942732	http://genome.ucsc.edu/cgi-bin/hgTracks?db=hg19&position=chr16:56299895-59342626&hgsid=443362677_4V80BwZqd7j9QbFDPX1nAl3yp6cs
16	59303177	65329890	187	-0.8698	6026714	http://genome.ucsc.edu/cgi-bin/hgTracks?db=hg19&position=chr16:59253177-65379890&hgsid=443362677_4V80BwZqd7j9QbFDPX1nAl3yp6cs
16	65345774	90215975	1793	-0.127	24870202	http://genome.ucsc.edu/cgi-bin/hgTracks?db=hg19&position=chr16:65295774-90265975&hgsid=443362677_4V80BwZqd7j9QbFDPX1nAl3yp6cs
17	8759	6047858	855	-0.051	6039100	http://genome.ucsc.edu/cgi-bin/hgTracks?db=hg19&position=chr17:-41241-6097858&hgsid=443362677_4V80BwZqd7j9QbFDPX1nAl3yp6cs
17	6061851	6152586	11	-1.3521	90736	http://genome.ucsc.edu/cgi-bin/hgTracks?db=hg19&position=chr17:6011851-6202586&hgsid=443362677_4V80BwZqd7j9QbFDPX1nAl3yp6cs
17	6155432	8488254	308	-0.0413	2332823	http://genome.ucsc.edu/cgi-bin/hgTracks?db=hg19&position=chr17:6105432-8538254&hgsid=443362677_4V80BwZqd7j9QbFDPX1nAl3yp6cs
17	8494283	8995300	44	-0.7432	501018	http://genome.ucsc.edu/cgi-bin/hgTracks?db=hg19&position=chr17:8444283-9045300&hgsid=443362677_4V80BwZqd7j9QbFDPX1nAl3yp6cs
17	8999209	10812822	227	-0.1239	1813614	http://genome.ucsc.edu/cgi-bin/hgTracks?db=hg19&position=chr17:8949209-10862822&hgsid=443362677_4V80BwZqd7j9QbFDPX1nAl3yp6cs
17	10844131	11437002	45	-0.8913	592872	http://genome.ucsc.edu/cgi-bin/hgTracks?db=hg19&position=chr17:10794131-11487002&hgsid=443362677_4V80BwZqd7j9QbFDPX1nAl3yp6cs
17	11437386	13026363	126	-0.3604	1588978	http://genome.ucsc.edu/cgi-bin/hgTracks?db=hg19&position=chr17:11387386-13076363&hgsid=443362677_4V80BwZqd7j9QbFDPX1nAl3yp6cs
17	13028652	15202825	121	-0.8587	2174174	http://genome.ucsc.edu/cgi-bin/hgTracks?db=hg19&position=chr17:12978652-15252825&hgsid=443362677_4V80BwZqd7j9QbFDPX1nAl3yp6cs
17	15224419	21932497	591	-0.1307	6708079	http://genome.ucsc.edu/cgi-bin/hgTracks?db=hg19&position=chr17:15174419-21982497&hgsid=443362677_4V80BwZqd7j9QbFDPX1nAl3yp6cs
17	25344898	31332060	567	-0.1971	5987163	http://genome.ucsc.edu/cgi-bin/hgTracks?db=hg19&position=chr17:25294898-31382060&hgsid=443362677_4V80BwZqd7j9QbFDPX1nAl3yp6cs
17	31397448	33096577	33	-1.5327	1699130	http://genome.ucsc.edu/cgi-bin/hgTracks?db=hg19&position=chr17:31347448-33146577&hgsid=443362677_4V80BwZqd7j9QbFDPX1nAl3yp6cs
17	33160281	49377709	1690	-0.2604	16217429	http://genome.ucsc.edu/cgi-bin/hgTracks?db=hg19&position=chr17:33110281-49427709&hgsid=443362677_4V80BwZqd7j9QbFDPX1nAl3yp6cs
17	49419234	52785993	83	-1.2401	3366760	http://genome.ucsc.edu/cgi-bin/hgTracks?db=hg19&position=chr17:49369234-52835993&hgsid=443362677_4V80BwZqd7j9QbFDPX1nAl3yp6cs
17	52810656	66239368	1067	-0.3254	13428713	http://genome.ucsc.edu/cgi-bin/hgTracks?db=hg19&position=chr17:52760656-66289368&hgsid=443362677_4V80BwZqd7j9QbFDPX1nAl3yp6cs
17	66268036	66714501	32	-1.1245	446466	http://genome.ucsc.edu/cgi-bin/hgTracks?db=hg19&position=chr17:66218036-66764501&hgsid=443362677_4V80BwZqd7j9QbFDPX1nAl3yp6cs
17	66746836	80032156	1060	-0.2222	13285321	http://genome.ucsc.edu/cgi-bin/hgTracks?db=hg19&position=chr17:66696836-80082156&hgsid=443362677_4V80BwZqd7j9QbFDPX1nAl3yp6cs
17	80033416	80067949	4	-2.509	34534	http://genome.ucsc.edu/cgi-bin/hgTracks?db=hg19&position=chr17:79983416-80117949&hgsid=443362677_4V80BwZqd7j9QbFDPX1nAl3yp6cs
17	80084080	81118278	120	-0.1803	1034199	http://genome.ucsc.edu/cgi-bin/hgTracks?db=hg19&position=chr17:80034080-81168278&hgsid=443362677_4V80BwZqd7j9QbFDPX1nAl3yp6cs
18	31915	15371135	824	-0.4777	15339221	http://genome.ucsc.edu/cgi-bin/hgTracks?db=hg19&position=chr18:-18085-15421135&hgsid=443362677_4V80BwZqd7j9QbFDPX1nAl3yp6cs
18	18553834	21689894	274	-0.2351	3136061	http://genome.ucsc.edu/cgi-bin/hgTracks?db=hg19&position=chr18:18503834-21739894&hgsid=443362677_4V80BwZqd7j9QbFDPX1nAl3yp6cs
18	21723954	26130437	164	-0.8347	4406484	http://genome.ucsc.edu/cgi-bin/hgTracks?db=hg19&position=chr18:21673954-26180437&hgsid=443362677_4V80BwZqd7j9QbFDPX1nAl3yp6cs
18	26201130	40606443	413	-0.3086	14405314	http://genome.ucsc.edu/cgi-bin/hgTracks?db=hg19&position=chr18:26151130-40656443&hgsid=443362677_4V80BwZqd7j9QbFDPX1nAl3yp6cs
18	40656992	42789232	42	-1.2365	2132241	http://genome.ucsc.edu/cgi-bin/hgTracks?db=hg19&position=chr18:40606992-42839232&hgsid=443362677_4V80BwZqd7j9QbFDPX1nAl3yp6cs
18	42826630	48714002	256	-0.1878	5887373	http://genome.ucsc.edu/cgi-bin/hgTracks?db=hg19&position=chr18:42776630-48764002&hgsid=443362677_4V80BwZqd7j9QbFDPX1nAl3yp6cs
18	48733321	51535873	62	-0.8637	2802553	http://genome.ucsc.edu/cgi-bin/hgTracks?db=hg19&position=chr18:48683321-51585873&hgsid=443362677_4V80BwZqd7j9QbFDPX1nAl3yp6cs
18	51576424	53810681	60	-0.0698	2234258	http://genome.ucsc.edu/cgi-bin/hgTracks?db=hg19&position=chr18:51526424-53860681&hgsid=443362677_4V80BwZqd7j9QbFDPX1nAl3yp6cs
18	53904174	54229500	9	-1.5744	325327	http://genome.ucsc.edu/cgi-bin/hgTracks?db=hg19&position=chr18:53854174-54279500&hgsid=443362677_4V80BwZqd7j9QbFDPX1nAl3yp6cs
18	54266884	77977184	875	-0.3798	23710301	http://genome.ucsc.edu/cgi-bin/hgTracks?db=hg19&position=chr18:54216884-78027184&hgsid=443362677_4V80BwZqd7j9QbFDPX1nAl3yp6cs
19	183513	13390392	2082	-0.2827	13206880	http://genome.ucsc.edu/cgi-bin/hgTracks?db=hg19&position=chr19:133513-13440392&hgsid=443362677_4V80BwZqd7j9QbFDPX1nAl3yp6cs
19	13404352	13810500	46	-1.0146	406149	http://genome.ucsc.edu/cgi-bin/hgTracks?db=hg19&position=chr19:13354352-13860500&hgsid=443362677_4V80BwZqd7j9QbFDPX1nAl3yp6cs
19	13822759	14654343	130	-0.1376	831585	http://genome.ucsc.edu/cgi-bin/hgTracks?db=hg19&position=chr19:13772759-14704343&hgsid=443362677_4V80BwZqd7j9QbFDPX1nAl3yp6cs
19	14657323	15051882	49	-1.1645	394560	http://genome.ucsc.edu/cgi-bin/hgTracks?db=hg19&position=chr19:14607323-15101882&hgsid=443362677_4V80BwZqd7j9QbFDPX1nAl3yp6cs
19	15053713	20165356	691	-0.1546	5111644	http://genome.ucsc.edu/cgi-bin/hgTracks?db=hg19&position=chr19:15003713-20215356&hgsid=443362677_4V80BwZqd7j9QbFDPX1nAl3yp6cs
19	20166222	20925596	57	-0.8454	759375	http://genome.ucsc.edu/cgi-bin/hgTracks?db=hg19&position=chr19:20116222-20975596&hgsid=443362677_4V80BwZqd7j9QbFDPX1nAl3yp6cs
19	20959845	21727211	80	-0.1714	767367	http://genome.ucsc.edu/cgi-bin/hgTracks?db=hg19&position=chr19:20909845-21777211&hgsid=443362677_4V80BwZqd7j9QbFDPX1nAl3yp6cs
19	21739433	23441218	153	-1.061	1701786	http://genome.ucsc.edu/cgi-bin/hgTracks?db=hg19&position=chr19:21689433-23491218&hgsid=443362677_4V80BwZqd7j9QbFDPX1nAl3yp6cs
19	23443437	24316231	74	-0.1486	872795	http://genome.ucsc.edu/cgi-bin/hgTracks?db=hg19&position=chr19:23393437-24366231&hgsid=443362677_4V80BwZqd7j9QbFDPX1nAl3yp6cs
19	24343223	24494920	3	-2.6235	151698	http://genome.ucsc.edu/cgi-bin/hgTracks?db=hg19&position=chr19:24293223-24544920&hgsid=443362677_4V80BwZqd7j9QbFDPX1nAl3yp6cs
19	28126214	33069680	164	-0.8127	4943467	http://genome.ucsc.edu/cgi-bin/hgTracks?db=hg19&position=chr19:28076214-33119680&hgsid=443362677_4V80BwZqd7j9QbFDPX1nAl3yp6cs
19	33070876	36864103	353	-0.2855	3793228	http://genome.ucsc.edu/cgi-bin/hgTracks?db=hg19&position=chr19:33020876-36914103&hgsid=443362677_4V80BwZqd7j9QbFDPX1nAl3yp6cs
19	36868674	38208631	150	-0.9377	1339958	http://genome.ucsc.edu/cgi-bin/hgTracks?db=hg19&position=chr19:36818674-38258631&hgsid=443362677_4V80BwZqd7j9QbFDPX1nAl3yp6cs
19	38215633	52881824	1676	-0.2077	14666192	http://genome.ucsc.edu/cgi-bin/hgTracks?db=hg19&position=chr19:38165633-52931824&hgsid=443362677_4V80BwZqd7j9QbFDPX1nAl3yp6cs
19	52889979	52921330	7	-2.7003	31352	http://genome.ucsc.edu/cgi-bin/hgTracks?db=hg19&position=chr19:52839979-52971330&hgsid=443362677_4V80BwZqd7j9QbFDPX1nAl3yp6cs
19	52931152	53609789	90	-0.1698	678638	http://genome.ucsc.edu/cgi-bin/hgTracks?db=hg19&position=chr19:52881152-53659789&hgsid=443362677_4V80BwZqd7j9QbFDPX1nAl3yp6cs
19	53616684	54329559	114	-0.9808	712876	http://genome.ucsc.edu/cgi-bin/hgTracks?db=hg19&position=chr19:53566684-54379559&hgsid=443362677_4V80BwZqd7j9QbFDPX1nAl3yp6cs
19	54344989	55468806	151	-0.4562	1123818	http://genome.ucsc.edu/cgi-bin/hgTracks?db=hg19&position=chr19:54294989-55518806&hgsid=443362677_4V80BwZqd7j9QbFDPX1nAl3yp6cs
19	55469937	55545848	19	-1.2555	75912	http://genome.ucsc.edu/cgi-bin/hgTracks?db=hg19&position=chr19:55419937-55595848&hgsid=443362677_4V80BwZqd7j9QbFDPX1nAl3yp6cs
19	55551131	59093829	425	-0.5921	3542699	http://genome.ucsc.edu/cgi-bin/hgTracks?db=hg19&position=chr19:55501131-59143829&hgsid=443362677_4V80BwZqd7j9QbFDPX1nAl3yp6cs
20	82019	6789998	449	-0.468	6707980	http://genome.ucsc.edu/cgi-bin/hgTracks?db=hg19&position=chr20:32019-6839998&hgsid=443362677_4V80BwZqd7j9QbFDPX1nAl3yp6cs
20	6794583	9702225	72	-1.2301	2907643	http://genome.ucsc.edu/cgi-bin/hgTracks?db=hg19&position=chr20:6744583-9752225&hgsid=443362677_4V80BwZqd7j9QbFDPX1nAl3yp6cs
20	9703184	16606644	203	-0.5066	6903461	http://genome.ucsc.edu/cgi-bin/hgTracks?db=hg19&position=chr20:9653184-16656644&hgsid=443362677_4V80BwZqd7j9QbFDPX1nAl3yp6cs
20	16617432	17334034	24	-1.7048	716603	http://genome.ucsc.edu/cgi-bin/hgTracks?db=hg19&position=chr20:16567432-17384034&hgsid=443362677_4V80BwZqd7j9QbFDPX1nAl3yp6cs
20	17421431	26248131	287	-0.4786	8826701	http://genome.ucsc.edu/cgi-bin/hgTracks?db=hg19&position=chr20:17371431-26298131&hgsid=443362677_4V80BwZqd7j9QbFDPX1nAl3yp6cs
20	29442630	30057150	28	-1.2811	614521	http://genome.ucsc.edu/cgi-bin/hgTracks?db=hg19&position=chr20:29392630-30107150&hgsid=443362677_4V80BwZqd7j9QbFDPX1nAl3yp6cs
20	30079881	50818491	1562	-0.3584	20738611	http://genome.ucsc.edu/cgi-bin/hgTracks?db=hg19&position=chr20:30029881-50868491&hgsid=443362677_4V80BwZqd7j9QbFDPX1nAl3yp6cs
20	50828464	51931253	27	-1.4537	1102790	http://genome.ucsc.edu/cgi-bin/hgTracks?db=hg19&position=chr20:50778464-51981253&hgsid=443362677_4V80BwZqd7j9QbFDPX1nAl3yp6cs
20	51938147	52828656	91	-0.4232	890510	http://genome.ucsc.edu/cgi-bin/hgTracks?db=hg19&position=chr20:51888147-52878656&hgsid=443362677_4V80BwZqd7j9QbFDPX1nAl3yp6cs
20	52841381	53802206	49	-1.5361	960826	http://genome.ucsc.edu/cgi-bin/hgTracks?db=hg19&position=chr20:52791381-53852206&hgsid=443362677_4V80BwZqd7j9QbFDPX1nAl3yp6cs
20	53867047	58007754	184	-0.4947	4140708	http://genome.ucsc.edu/cgi-bin/hgTracks?db=hg19&position=chr20:53817047-58057754&hgsid=443362677_4V80BwZqd7j9QbFDPX1nAl3yp6cs
20	58059132	60386820	52	-1.241	2327689	http://genome.ucsc.edu/cgi-bin/hgTracks?db=hg19&position=chr20:58009132-60436820&hgsid=443362677_4V80BwZqd7j9QbFDPX1nAl3yp6cs
20	60535664	62934100	138	-0.4107	2398437	http://genome.ucsc.edu/cgi-bin/hgTracks?db=hg19&position=chr20:60485664-62984100&hgsid=443362677_4V80BwZqd7j9QbFDPX1nAl3yp6cs
21	9418291	11154720	63	-1.1217	1736430	http://genome.ucsc.edu/cgi-bin/hgTracks?db=hg19&position=chr21:9368291-11204720&hgsid=443362677_4V80BwZqd7j9QbFDPX1nAl3yp6cs
21	14383121	17275865	96	-0.7166	2892745	http://genome.ucsc.edu/cgi-bin/hgTracks?db=hg19&position=chr21:14333121-17325865&hgsid=443362677_4V80BwZqd7j9QbFDPX1nAl3yp6cs
21	17333267	18633624	46	-1.3657	1300358	http://genome.ucsc.edu/cgi-bin/hgTracks?db=hg19&position=chr21:17283267-18683624&hgsid=443362677_4V80BwZqd7j9QbFDPX1nAl3yp6cs
21	18709087	18954353	29	-0.2719	245267	http://genome.ucsc.edu/cgi-bin/hgTracks?db=hg19&position=chr21:18659087-19004353&hgsid=443362677_4V80BwZqd7j9QbFDPX1nAl3yp6cs
21	19035035	26865804	296	-1.4603	7830770	http://genome.ucsc.edu/cgi-bin/hgTracks?db=hg19&position=chr21:18985035-26915804&hgsid=443362677_4V80BwZqd7j9QbFDPX1nAl3yp6cs
21	26949494	27551780	42	-0.0656	602287	http://genome.ucsc.edu/cgi-bin/hgTracks?db=hg19&position=chr21:26899494-27601780&hgsid=443362677_4V80BwZqd7j9QbFDPX1nAl3yp6cs
21	27558571	30123477	88	-1.3546	2564907	http://genome.ucsc.edu/cgi-bin/hgTracks?db=hg19&position=chr21:27508571-30173477&hgsid=443362677_4V80BwZqd7j9QbFDPX1nAl3yp6cs
21	30234885	30819712	21	-0.1476	584828	http://genome.ucsc.edu/cgi-bin/hgTracks?db=hg19&position=chr21:30184885-30869712&hgsid=443362677_4V80BwZqd7j9QbFDPX1nAl3yp6cs
21	30822774	33078307	133	-1.3083	2255534	http://genome.ucsc.edu/cgi-bin/hgTracks?db=hg19&position=chr21:30772774-33128307&hgsid=443362677_4V80BwZqd7j9QbFDPX1nAl3yp6cs
21	33098451	41587070	477	-0.3583	8488620	http://genome.ucsc.edu/cgi-bin/hgTracks?db=hg19&position=chr21:33048451-41637070&hgsid=443362677_4V80BwZqd7j9QbFDPX1nAl3yp6cs
21	41652201	42359365	45	-1.6843	707165	http://genome.ucsc.edu/cgi-bin/hgTracks?db=hg19&position=chr21:41602201-42409365&hgsid=443362677_4V80BwZqd7j9QbFDPX1nAl3yp6cs
21	42360905	46650868	220	-0.1725	4289964	http://genome.ucsc.edu/cgi-bin/hgTracks?db=hg19&position=chr21:42310905-46700868&hgsid=443362677_4V80BwZqd7j9QbFDPX1nAl3yp6cs
21	46658030	47577184	29	-1.1486	919155	http://genome.ucsc.edu/cgi-bin/hgTracks?db=hg19&position=chr21:46608030-47627184&hgsid=443362677_4V80BwZqd7j9QbFDPX1nAl3yp6cs
21	47584630	48117364	44	-0.0123	532735	http://genome.ucsc.edu/cgi-bin/hgTracks?db=hg19&position=chr21:47534630-48167364&hgsid=443362677_4V80BwZqd7j9QbFDPX1nAl3yp6cs
22	16080687	17064885	19	-0.281	984199	http://genome.ucsc.edu/cgi-bin/hgTracks?db=hg19&position=chr22:16030687-17114885&hgsid=443362677_4V80BwZqd7j9QbFDPX1nAl3yp6cs
22	17075491	17440011	19	-1.3467	364521	http://genome.ucsc.edu/cgi-bin/hgTracks?db=hg19&position=chr22:17025491-17490011&hgsid=443362677_4V80BwZqd7j9QbFDPX1nAl3yp6cs
22	17503142	22336118	454	-0.3036	4832977	http://genome.ucsc.edu/cgi-bin/hgTracks?db=hg19&position=chr22:17453142-22386118&hgsid=443362677_4V80BwZqd7j9QbFDPX1nAl3yp6cs
22	22337892	23954578	75	-1.032	1616687	http://genome.ucsc.edu/cgi-bin/hgTracks?db=hg19&position=chr22:22287892-24004578&hgsid=443362677_4V80BwZqd7j9QbFDPX1nAl3yp6cs
22	23985050	27152328	250	-0.3348	3167279	http://genome.ucsc.edu/cgi-bin/hgTracks?db=hg19&position=chr22:23935050-27202328&hgsid=443362677_4V80BwZqd7j9QbFDPX1nAl3yp6cs
22	27266693	29051763	67	-1.1098	1785071	http://genome.ucsc.edu/cgi-bin/hgTracks?db=hg19&position=chr22:27216693-29101763&hgsid=443362677_4V80BwZqd7j9QbFDPX1nAl3yp6cs
22	29068249	32541404	402	-0.1819	3473156	http://genome.ucsc.edu/cgi-bin/hgTracks?db=hg19&position=chr22:29018249-32591404&hgsid=443362677_4V80BwZqd7j9QbFDPX1nAl3yp6cs
22	32567695	33530337	77	-0.7954	962643	http://genome.ucsc.edu/cgi-bin/hgTracks?db=hg19&position=chr22:32517695-33580337&hgsid=443362677_4V80BwZqd7j9QbFDPX1nAl3yp6cs
22	33591833	34338948	69	-0.0058	747116	http://genome.ucsc.edu/cgi-bin/hgTracks?db=hg19&position=chr22:33541833-34388948&hgsid=443362677_4V80BwZqd7j9QbFDPX1nAl3yp6cs
22	34351646	35600485	65	-0.9549	1248840	http://genome.ucsc.edu/cgi-bin/hgTracks?db=hg19&position=chr22:34301646-35650485&hgsid=443362677_4V80BwZqd7j9QbFDPX1nAl3yp6cs
22	35605073	45317339	1047	-0.2173	9712267	http://genome.ucsc.edu/cgi-bin/hgTracks?db=hg19&position=chr22:35555073-45367339&hgsid=443362677_4V80BwZqd7j9QbFDPX1nAl3yp6cs
22	45324382	45527183	23	-1.3918	202802	http://genome.ucsc.edu/cgi-bin/hgTracks?db=hg19&position=chr22:45274382-45577183&hgsid=443362677_4V80BwZqd7j9QbFDPX1nAl3yp6cs
22	45564875	45745310	22	-0.3138	180436	http://genome.ucsc.edu/cgi-bin/hgTracks?db=hg19&position=chr22:45514875-45795310&hgsid=443362677_4V80BwZqd7j9QbFDPX1nAl3yp6cs
22	45749066	45812434	8	-1.8628	63369	http://genome.ucsc.edu/cgi-bin/hgTracks?db=hg19&position=chr22:45699066-45862434&hgsid=443362677_4V80BwZqd7j9QbFDPX1nAl3yp6cs
22	45815830	47921821	128	-0.2173	2105992	http://genome.ucsc.edu/cgi-bin/hgTracks?db=hg19&position=chr22:45765830-47971821&hgsid=443362677_4V80BwZqd7j9QbFDPX1nAl3yp6cs
22	47923215	49755697	78	-1.0199	1832483	http://genome.ucsc.edu/cgi-bin/hgTracks?db=hg19&position=chr22:47873215-49805697&hgsid=443362677_4V80BwZqd7j9QbFDPX1nAl3yp6cs
22	49782904	51244237	115	-0.0846	1461334	http://genome.ucsc.edu/cgi-bin/hgTracks?db=hg19&position=chr22:49732904-51294237&hgsid=443362677_4V80BwZqd7j9QbFDPX1nAl3yp6cs
23	219332	4675282	109	-0.1935	4455951	http://genome.ucsc.edu/cgi-bin/hgTracks?db=hg19&position=chr23:169332-4725282&hgsid=443362677_4V80BwZqd7j9QbFDPX1nAl3yp6cs
23	4732638	6868544	58	-1.0823	2135907	http://genome.ucsc.edu/cgi-bin/hgTracks?db=hg19&position=chr23:4682638-6918544&hgsid=443362677_4V80BwZqd7j9QbFDPX1nAl3yp6cs
23	6910406	7240534	11	0.0532	330129	http://genome.ucsc.edu/cgi-bin/hgTracks?db=hg19&position=chr23:6860406-7290534&hgsid=443362677_4V80BwZqd7j9QbFDPX1nAl3yp6cs
23	7393700	8681746	47	-0.8961	1288047	http://genome.ucsc.edu/cgi-bin/hgTracks?db=hg19&position=chr23:7343700-8731746&hgsid=443362677_4V80BwZqd7j9QbFDPX1nAl3yp6cs
23	8697532	22288373	618	-0.1115	13590842	http://genome.ucsc.edu/cgi-bin/hgTracks?db=hg19&position=chr23:8647532-22338373&hgsid=443362677_4V80BwZqd7j9QbFDPX1nAl3yp6cs
23	22295405	23406872	50	-0.8176	1111468	http://genome.ucsc.edu/cgi-bin/hgTracks?db=hg19&position=chr23:22245405-23456872&hgsid=443362677_4V80BwZqd7j9QbFDPX1nAl3yp6cs
23	23418519	25048933	167	0.0612	1630415	http://genome.ucsc.edu/cgi-bin/hgTracks?db=hg19&position=chr23:23368519-25098933&hgsid=443362677_4V80BwZqd7j9QbFDPX1nAl3yp6cs
23	25063472	27466989	65	-0.7111	2403518	http://genome.ucsc.edu/cgi-bin/hgTracks?db=hg19&position=chr23:25013472-27516989&hgsid=443362677_4V80BwZqd7j9QbFDPX1nAl3yp6cs
23	27468544	58421316	1511	-0.124	30952773	http://genome.ucsc.edu/cgi-bin/hgTracks?db=hg19&position=chr23:27418544-58471316&hgsid=443362677_4V80BwZqd7j9QbFDPX1nAl3yp6cs
23	62141982	68956266	145	-0.2548	6814285	http://genome.ucsc.edu/cgi-bin/hgTracks?db=hg19&position=chr23:62091982-69006266&hgsid=443362677_4V80BwZqd7j9QbFDPX1nAl3yp6cs
23	69094070	69231273	7	-1.701	137204	http://genome.ucsc.edu/cgi-bin/hgTracks?db=hg19&position=chr23:69044070-69281273&hgsid=443362677_4V80BwZqd7j9QbFDPX1nAl3yp6cs
23	69240333	97619998	783	-0.1713	28379666	http://genome.ucsc.edu/cgi-bin/hgTracks?db=hg19&position=chr23:69190333-97669998&hgsid=443362677_4V80BwZqd7j9QbFDPX1nAl3yp6cs
23	97655123	99220728	28	-0.8898	1565606	http://genome.ucsc.edu/cgi-bin/hgTracks?db=hg19&position=chr23:97605123-99270728&hgsid=443362677_4V80BwZqd7j9QbFDPX1nAl3yp6cs
23	99278294	106941105	280	-0.0014	7662812	http://genome.ucsc.edu/cgi-bin/hgTracks?db=hg19&position=chr23:99228294-106991105&hgsid=443362677_4V80BwZqd7j9QbFDPX1nAl3yp6cs
23	106947025	107958584	26	-0.8816	1011560	http://genome.ucsc.edu/cgi-bin/hgTracks?db=hg19&position=chr23:106897025-108008584&hgsid=443362677_4V80BwZqd7j9QbFDPX1nAl3yp6cs
23	107982560	112593028	128	-0.3026	4610469	http://genome.ucsc.edu/cgi-bin/hgTracks?db=hg19&position=chr23:107932560-112643028&hgsid=443362677_4V80BwZqd7j9QbFDPX1nAl3yp6cs
23	112657312	113794476	34	-0.9357	1137165	http://genome.ucsc.edu/cgi-bin/hgTracks?db=hg19&position=chr23:112607312-113844476&hgsid=443362677_4V80BwZqd7j9QbFDPX1nAl3yp6cs
23	113797787	120149344	323	-0.0452	6351558	http://genome.ucsc.edu/cgi-bin/hgTracks?db=hg19&position=chr23:113747787-120199344&hgsid=443362677_4V80BwZqd7j9QbFDPX1nAl3yp6cs
23	120160109	122385379	44	-0.7767	2225271	http://genome.ucsc.edu/cgi-bin/hgTracks?db=hg19&position=chr23:120110109-122435379&hgsid=443362677_4V80BwZqd7j9QbFDPX1nAl3yp6cs
23	122472494	123323612	96	-0.0091	851119	http://genome.ucsc.edu/cgi-bin/hgTracks?db=hg19&position=chr23:122422494-123373612&hgsid=443362677_4V80BwZqd7j9QbFDPX1nAl3yp6cs
23	123361148	126689842	67	-0.7728	3328695	http://genome.ucsc.edu/cgi-bin/hgTracks?db=hg19&position=chr23:123311148-126739842&hgsid=443362677_4V80BwZqd7j9QbFDPX1nAl3yp6cs
23	126704869	134061364	314	-0.0628	7356496	http://genome.ucsc.edu/cgi-bin/hgTracks?db=hg19&position=chr23:126654869-134111364&hgsid=443362677_4V80BwZqd7j9QbFDPX1nAl3yp6cs
23	134065539	135765610	58	-0.6774	1700072	http://genome.ucsc.edu/cgi-bin/hgTracks?db=hg19&position=chr23:134015539-135815610&hgsid=443362677_4V80BwZqd7j9QbFDPX1nAl3yp6cs
23	135783959	136584833	49	0.0914	800875	http://genome.ucsc.edu/cgi-bin/hgTracks?db=hg19&position=chr23:135733959-136634833&hgsid=443362677_4V80BwZqd7j9QbFDPX1nAl3yp6cs
23	136618961	138685918	69	-0.9348	2066958	http://genome.ucsc.edu/cgi-bin/hgTracks?db=hg19&position=chr23:136568961-138735918&hgsid=443362677_4V80BwZqd7j9QbFDPX1nAl3yp6cs
23	138688609	154819035	513	-0.4004	16130427	http://genome.ucsc.edu/cgi-bin/hgTracks?db=hg19&position=chr23:138638609-154869035&hgsid=443362677_4V80BwZqd7j9QbFDPX1nAl3yp6cs
24	148518	10032472	127	-0.0345	9883955	http://genome.ucsc.edu/cgi-bin/hgTracks?db=hg19&position=chr24:98518-10082472&hgsid=443362677_4V80BwZqd7j9QbFDPX1nAl3yp6cs
24	13132760	13501157	12	-0.5502	368398	http://genome.ucsc.edu/cgi-bin/hgTracks?db=hg19&position=chr24:13082760-13551157&hgsid=443362677_4V80BwZqd7j9QbFDPX1nAl3yp6cs
24	13507176	59021020	147	-0.02	45513845	http://genome.ucsc.edu/cgi-bin/hgTracks?db=hg19&position=chr24:13457176-59071020&hgsid=443362677_4V80BwZqd7j9QbFDPX1nAl3yp6cs
24	59023927	59327398	4	-1.123	303472	http://genome.ucsc.edu/cgi-bin/hgTracks?db=hg19&position=chr24:58973927-59377398&hgsid=443362677_4V80BwZqd7j9QbFDPX1nAl3yp6cs

## Sheet: 557T
chrom	loc.start	loc.end	num.mark	seg.mean	SIZE	UCSC GB view
1	532833	63312772	4604	-0.3913	62779940	http://genome.ucsc.edu/cgi-bin/hgTracks?db=hg19&position=chr1:482833-63362772&hgsid=443362677_4V80BwZqd7j9QbFDPX1nAl3yp6cs
1	63336469	63776722	28	-1.2912	440254	http://genome.ucsc.edu/cgi-bin/hgTracks?db=hg19&position=chr1:63286469-63826722&hgsid=443362677_4V80BwZqd7j9QbFDPX1nAl3yp6cs
1	63780119	100991320	1239	-0.536	37211202	http://genome.ucsc.edu/cgi-bin/hgTracks?db=hg19&position=chr1:63730119-101041320&hgsid=443362677_4V80BwZqd7j9QbFDPX1nAl3yp6cs
1	101083192	108512789	187	-0.9647	7429598	http://genome.ucsc.edu/cgi-bin/hgTracks?db=hg19&position=chr1:101033192-108562789&hgsid=443362677_4V80BwZqd7j9QbFDPX1nAl3yp6cs
1	108535841	121182415	525	-0.3279	12646575	http://genome.ucsc.edu/cgi-bin/hgTracks?db=hg19&position=chr1:108485841-121232415&hgsid=443362677_4V80BwZqd7j9QbFDPX1nAl3yp6cs
1	142582362	187081732	2173	-0.382	44499371	http://genome.ucsc.edu/cgi-bin/hgTracks?db=hg19&position=chr1:142532362-187131732&hgsid=443362677_4V80BwZqd7j9QbFDPX1nAl3yp6cs
1	187106737	192894030	147	-1.019	5787294	http://genome.ucsc.edu/cgi-bin/hgTracks?db=hg19&position=chr1:187056737-192944030&hgsid=443362677_4V80BwZqd7j9QbFDPX1nAl3yp6cs
1	192930205	236768607	2036	-0.4593	43838403	http://genome.ucsc.edu/cgi-bin/hgTracks?db=hg19&position=chr1:192880205-236818607&hgsid=443362677_4V80BwZqd7j9QbFDPX1nAl3yp6cs
1	236777020	239334825	115	-0.8993	2557806	http://genome.ucsc.edu/cgi-bin/hgTracks?db=hg19&position=chr1:236727020-239384825&hgsid=443362677_4V80BwZqd7j9QbFDPX1nAl3yp6cs
1	239340935	240044507	43	-0.1163	703573	http://genome.ucsc.edu/cgi-bin/hgTracks?db=hg19&position=chr1:239290935-240094507&hgsid=443362677_4V80BwZqd7j9QbFDPX1nAl3yp6cs
1	240045298	241136734	74	-1.0203	1091437	http://genome.ucsc.edu/cgi-bin/hgTracks?db=hg19&position=chr1:239995298-241186734&hgsid=443362677_4V80BwZqd7j9QbFDPX1nAl3yp6cs
1	241165677	249237754	513	-0.4359	8072078	http://genome.ucsc.edu/cgi-bin/hgTracks?db=hg19&position=chr1:241115677-249287754&hgsid=443362677_4V80BwZqd7j9QbFDPX1nAl3yp6cs
2	38125	4607260	94	-0.4457	4569136	http://genome.ucsc.edu/cgi-bin/hgTracks?db=hg19&position=chr2:-11875-4657260&hgsid=443362677_4V80BwZqd7j9QbFDPX1nAl3yp6cs
2	4610505	6297383	48	-1.2313	1686879	http://genome.ucsc.edu/cgi-bin/hgTracks?db=hg19&position=chr2:4560505-6347383&hgsid=443362677_4V80BwZqd7j9QbFDPX1nAl3yp6cs
2	6340038	29162901	1083	-0.4158	22822864	http://genome.ucsc.edu/cgi-bin/hgTracks?db=hg19&position=chr2:6290038-29212901&hgsid=443362677_4V80BwZqd7j9QbFDPX1nAl3yp6cs
2	29185134	30514657	53	-1.0425	1329524	http://genome.ucsc.edu/cgi-bin/hgTracks?db=hg19&position=chr2:29135134-30564657&hgsid=443362677_4V80BwZqd7j9QbFDPX1nAl3yp6cs
2	30521911	33998892	225	-0.3265	3476982	http://genome.ucsc.edu/cgi-bin/hgTracks?db=hg19&position=chr2:30471911-34048892&hgsid=443362677_4V80BwZqd7j9QbFDPX1nAl3yp6cs
2	34012779	36794829	90	-0.944	2782051	http://genome.ucsc.edu/cgi-bin/hgTracks?db=hg19&position=chr2:33962779-36844829&hgsid=443362677_4V80BwZqd7j9QbFDPX1nAl3yp6cs
2	36808216	48780719	623	-0.3519	11972504	http://genome.ucsc.edu/cgi-bin/hgTracks?db=hg19&position=chr2:36758216-48830719&hgsid=443362677_4V80BwZqd7j9QbFDPX1nAl3yp6cs
2	48785286	53871754	127	-0.8808	5086469	http://genome.ucsc.edu/cgi-bin/hgTracks?db=hg19&position=chr2:48735286-53921754&hgsid=443362677_4V80BwZqd7j9QbFDPX1nAl3yp6cs
2	53971445	56392617	127	-0.2641	2421173	http://genome.ucsc.edu/cgi-bin/hgTracks?db=hg19&position=chr2:53921445-56442617&hgsid=443362677_4V80BwZqd7j9QbFDPX1nAl3yp6cs
2	56533357	57619565	27	-1.4765	1086209	http://genome.ucsc.edu/cgi-bin/hgTracks?db=hg19&position=chr2:56483357-57669565&hgsid=443362677_4V80BwZqd7j9QbFDPX1nAl3yp6cs
2	57620452	59362412	46	-0.7265	1741961	http://genome.ucsc.edu/cgi-bin/hgTracks?db=hg19&position=chr2:57570452-59412412&hgsid=443362677_4V80BwZqd7j9QbFDPX1nAl3yp6cs
2	59387136	59588859	5	-2.0738	201724	http://genome.ucsc.edu/cgi-bin/hgTracks?db=hg19&position=chr2:59337136-59638859&hgsid=443362677_4V80BwZqd7j9QbFDPX1nAl3yp6cs
2	59695431	76137205	881	-0.3931	16441775	http://genome.ucsc.edu/cgi-bin/hgTracks?db=hg19&position=chr2:59645431-76187205&hgsid=443362677_4V80BwZqd7j9QbFDPX1nAl3yp6cs
2	76156668	84185028	229	-0.9189	8028361	http://genome.ucsc.edu/cgi-bin/hgTracks?db=hg19&position=chr2:76106668-84235028&hgsid=443362677_4V80BwZqd7j9QbFDPX1nAl3yp6cs
2	84188076	92242661	311	-0.4987	8054586	http://genome.ucsc.edu/cgi-bin/hgTracks?db=hg19&position=chr2:84138076-92292661&hgsid=443362677_4V80BwZqd7j9QbFDPX1nAl3yp6cs
2	95338540	98947462	177	-0.369	3608923	http://genome.ucsc.edu/cgi-bin/hgTracks?db=hg19&position=chr2:95288540-98997462&hgsid=443362677_4V80BwZqd7j9QbFDPX1nAl3yp6cs
2	98957174	99000442	4	-2.0323	43269	http://genome.ucsc.edu/cgi-bin/hgTracks?db=hg19&position=chr2:98907174-99050442&hgsid=443362677_4V80BwZqd7j9QbFDPX1nAl3yp6cs
2	99042160	100123311	67	-0.1219	1081152	http://genome.ucsc.edu/cgi-bin/hgTracks?db=hg19&position=chr2:98992160-100173311&hgsid=443362677_4V80BwZqd7j9QbFDPX1nAl3yp6cs
2	100131436	101090551	43	-1.2881	959116	http://genome.ucsc.edu/cgi-bin/hgTracks?db=hg19&position=chr2:100081436-101140551&hgsid=443362677_4V80BwZqd7j9QbFDPX1nAl3yp6cs
2	101131813	139621032	1589	-0.5272	38489220	http://genome.ucsc.edu/cgi-bin/hgTracks?db=hg19&position=chr2:101081813-139671032&hgsid=443362677_4V80BwZqd7j9QbFDPX1nAl3yp6cs
2	139662311	142521842	81	-1.134	2859532	http://genome.ucsc.edu/cgi-bin/hgTracks?db=hg19&position=chr2:139612311-142571842&hgsid=443362677_4V80BwZqd7j9QbFDPX1nAl3yp6cs
2	142535077	143677565	30	-0.5076	1142489	http://genome.ucsc.edu/cgi-bin/hgTracks?db=hg19&position=chr2:142485077-143727565&hgsid=443362677_4V80BwZqd7j9QbFDPX1nAl3yp6cs
2	143885175	144324537	12	-1.5425	439363	http://genome.ucsc.edu/cgi-bin/hgTracks?db=hg19&position=chr2:143835175-144374537&hgsid=443362677_4V80BwZqd7j9QbFDPX1nAl3yp6cs
2	144479348	145322332	30	-0.2862	842985	http://genome.ucsc.edu/cgi-bin/hgTracks?db=hg19&position=chr2:144429348-145372332&hgsid=443362677_4V80BwZqd7j9QbFDPX1nAl3yp6cs
2	145347364	147711176	55	-1.4267	2363813	http://genome.ucsc.edu/cgi-bin/hgTracks?db=hg19&position=chr2:145297364-147761176&hgsid=443362677_4V80BwZqd7j9QbFDPX1nAl3yp6cs
2	147714888	153678182	206	-0.3441	5963295	http://genome.ucsc.edu/cgi-bin/hgTracks?db=hg19&position=chr2:147664888-153728182&hgsid=443362677_4V80BwZqd7j9QbFDPX1nAl3yp6cs
2	153695166	156501759	61	-1.0575	2806594	http://genome.ucsc.edu/cgi-bin/hgTracks?db=hg19&position=chr2:153645166-156551759&hgsid=443362677_4V80BwZqd7j9QbFDPX1nAl3yp6cs
2	156518192	161253169	151	-0.2045	4734978	http://genome.ucsc.edu/cgi-bin/hgTracks?db=hg19&position=chr2:156468192-161303169&hgsid=443362677_4V80BwZqd7j9QbFDPX1nAl3yp6cs
2	161312287	165430844	105	-0.9439	4118558	http://genome.ucsc.edu/cgi-bin/hgTracks?db=hg19&position=chr2:161262287-165480844&hgsid=443362677_4V80BwZqd7j9QbFDPX1nAl3yp6cs
2	165448737	187536771	830	-0.4859	22088035	http://genome.ucsc.edu/cgi-bin/hgTracks?db=hg19&position=chr2:165398737-187586771&hgsid=443362677_4V80BwZqd7j9QbFDPX1nAl3yp6cs
2	187646426	190160265	83	-1.0964	2513840	http://genome.ucsc.edu/cgi-bin/hgTracks?db=hg19&position=chr2:187596426-190210265&hgsid=443362677_4V80BwZqd7j9QbFDPX1nAl3yp6cs
2	190202001	225577678	1627	-0.5164	35375678	http://genome.ucsc.edu/cgi-bin/hgTracks?db=hg19&position=chr2:190152001-225627678&hgsid=443362677_4V80BwZqd7j9QbFDPX1nAl3yp6cs
2	225582883	228114953	84	-0.7799	2532071	http://genome.ucsc.edu/cgi-bin/hgTracks?db=hg19&position=chr2:225532883-228164953&hgsid=443362677_4V80BwZqd7j9QbFDPX1nAl3yp6cs
2	228117022	228712503	56	-0.2865	595482	http://genome.ucsc.edu/cgi-bin/hgTracks?db=hg19&position=chr2:228067022-228762503&hgsid=443362677_4V80BwZqd7j9QbFDPX1nAl3yp6cs
2	228801572	229840917	30	-1.3179	1039346	http://genome.ucsc.edu/cgi-bin/hgTracks?db=hg19&position=chr2:228751572-229890917&hgsid=443362677_4V80BwZqd7j9QbFDPX1nAl3yp6cs
2	229937228	243062779	689	-0.3656	13125552	http://genome.ucsc.edu/cgi-bin/hgTracks?db=hg19&position=chr2:229887228-243112779&hgsid=443362677_4V80BwZqd7j9QbFDPX1nAl3yp6cs
3	81317	8505356	266	-0.8223	8424040	http://genome.ucsc.edu/cgi-bin/hgTracks?db=hg19&position=chr3:31317-8555356&hgsid=443362677_4V80BwZqd7j9QbFDPX1nAl3yp6cs
3	8519705	20601885	551	-0.3751	12082181	http://genome.ucsc.edu/cgi-bin/hgTracks?db=hg19&position=chr3:8469705-20651885&hgsid=443362677_4V80BwZqd7j9QbFDPX1nAl3yp6cs
3	20632907	23445239	53	-1.2659	2812333	http://genome.ucsc.edu/cgi-bin/hgTracks?db=hg19&position=chr3:20582907-23495239&hgsid=443362677_4V80BwZqd7j9QbFDPX1nAl3yp6cs
3	23482954	75823864	2472	-0.4034	52340911	http://genome.ucsc.edu/cgi-bin/hgTracks?db=hg19&position=chr3:23432954-75873864&hgsid=443362677_4V80BwZqd7j9QbFDPX1nAl3yp6cs
3	75829648	90281211	390	-0.9408	14451564	http://genome.ucsc.edu/cgi-bin/hgTracks?db=hg19&position=chr3:75779648-90331211&hgsid=443362677_4V80BwZqd7j9QbFDPX1nAl3yp6cs
3	93530026	186789472	3655	-0.5235	93259447	http://genome.ucsc.edu/cgi-bin/hgTracks?db=hg19&position=chr3:93480026-186839472&hgsid=443362677_4V80BwZqd7j9QbFDPX1nAl3yp6cs
3	186805709	187047291	16	-1.8122	241583	http://genome.ucsc.edu/cgi-bin/hgTracks?db=hg19&position=chr3:186755709-187097291&hgsid=443362677_4V80BwZqd7j9QbFDPX1nAl3yp6cs
3	187063833	190462866	122	-0.3468	3399034	http://genome.ucsc.edu/cgi-bin/hgTracks?db=hg19&position=chr3:187013833-190512866&hgsid=443362677_4V80BwZqd7j9QbFDPX1nAl3yp6cs
3	190468850	192420505	70	-1.111	1951656	http://genome.ucsc.edu/cgi-bin/hgTracks?db=hg19&position=chr3:190418850-192470505&hgsid=443362677_4V80BwZqd7j9QbFDPX1nAl3yp6cs
3	192432400	197887341	480	-0.3647	5454942	http://genome.ucsc.edu/cgi-bin/hgTracks?db=hg19&position=chr3:192382400-197937341&hgsid=443362677_4V80BwZqd7j9QbFDPX1nAl3yp6cs
4	50401	18624118	758	-0.4178	18573718	http://genome.ucsc.edu/cgi-bin/hgTracks?db=hg19&position=chr4:401-18674118&hgsid=443362677_4V80BwZqd7j9QbFDPX1nAl3yp6cs
4	18667451	21790620	87	-1.1242	3123170	http://genome.ucsc.edu/cgi-bin/hgTracks?db=hg19&position=chr4:18617451-21840620&hgsid=443362677_4V80BwZqd7j9QbFDPX1nAl3yp6cs
4	21803324	27773107	216	-0.4175	5969784	http://genome.ucsc.edu/cgi-bin/hgTracks?db=hg19&position=chr4:21753324-27823107&hgsid=443362677_4V80BwZqd7j9QbFDPX1nAl3yp6cs
4	27809847	37482039	261	-0.934	9672193	http://genome.ucsc.edu/cgi-bin/hgTracks?db=hg19&position=chr4:27759847-37532039&hgsid=443362677_4V80BwZqd7j9QbFDPX1nAl3yp6cs
4	37518797	49619217	592	-0.4621	12100421	http://genome.ucsc.edu/cgi-bin/hgTracks?db=hg19&position=chr4:37468797-49669217&hgsid=443362677_4V80BwZqd7j9QbFDPX1nAl3yp6cs
4	52747218	57841966	232	-0.3865	5094749	http://genome.ucsc.edu/cgi-bin/hgTracks?db=hg19&position=chr4:52697218-57891966&hgsid=443362677_4V80BwZqd7j9QbFDPX1nAl3yp6cs
4	57870943	68062356	234	-0.9866	10191414	http://genome.ucsc.edu/cgi-bin/hgTracks?db=hg19&position=chr4:57820943-68112356&hgsid=443362677_4V80BwZqd7j9QbFDPX1nAl3yp6cs
4	68213123	85923738	655	-0.4054	17710616	http://genome.ucsc.edu/cgi-bin/hgTracks?db=hg19&position=chr4:68163123-85973738&hgsid=443362677_4V80BwZqd7j9QbFDPX1nAl3yp6cs
4	85932802	86756931	27	-1.2461	824130	http://genome.ucsc.edu/cgi-bin/hgTracks?db=hg19&position=chr4:85882802-86806931&hgsid=443362677_4V80BwZqd7j9QbFDPX1nAl3yp6cs
4	86761095	92966538	229	-0.3408	6205444	http://genome.ucsc.edu/cgi-bin/hgTracks?db=hg19&position=chr4:86711095-93016538&hgsid=443362677_4V80BwZqd7j9QbFDPX1nAl3yp6cs
4	93052715	99109656	173	-0.9269	6056942	http://genome.ucsc.edu/cgi-bin/hgTracks?db=hg19&position=chr4:93002715-99159656&hgsid=443362677_4V80BwZqd7j9QbFDPX1nAl3yp6cs
4	99121095	116104678	596	-0.4385	16983584	http://genome.ucsc.edu/cgi-bin/hgTracks?db=hg19&position=chr4:99071095-116154678&hgsid=443362677_4V80BwZqd7j9QbFDPX1nAl3yp6cs
4	116174762	119421996	86	-0.9337	3247235	http://genome.ucsc.edu/cgi-bin/hgTracks?db=hg19&position=chr4:116124762-119471996&hgsid=443362677_4V80BwZqd7j9QbFDPX1nAl3yp6cs
4	119424919	125917825	228	-0.4913	6492907	http://genome.ucsc.edu/cgi-bin/hgTracks?db=hg19&position=chr4:119374919-125967825&hgsid=443362677_4V80BwZqd7j9QbFDPX1nAl3yp6cs
4	125967414	128284777	57	-1.1796	2317364	http://genome.ucsc.edu/cgi-bin/hgTracks?db=hg19&position=chr4:125917414-128334777&hgsid=443362677_4V80BwZqd7j9QbFDPX1nAl3yp6cs
4	128290492	130239100	114	-0.3778	1948609	http://genome.ucsc.edu/cgi-bin/hgTracks?db=hg19&position=chr4:128240492-130289100&hgsid=443362677_4V80BwZqd7j9QbFDPX1nAl3yp6cs
4	130385305	137485213	150	-1.069	7099909	http://genome.ucsc.edu/cgi-bin/hgTracks?db=hg19&position=chr4:130335305-137535213&hgsid=443362677_4V80BwZqd7j9QbFDPX1nAl3yp6cs
4	137618442	154675246	614	-0.4228	17056805	http://genome.ucsc.edu/cgi-bin/hgTracks?db=hg19&position=chr4:137568442-154725246&hgsid=443362677_4V80BwZqd7j9QbFDPX1nAl3yp6cs
4	154689257	158124218	87	-1.119	3434962	http://genome.ucsc.edu/cgi-bin/hgTracks?db=hg19&position=chr4:154639257-158174218&hgsid=443362677_4V80BwZqd7j9QbFDPX1nAl3yp6cs
4	158133905	160358491	81	-0.3944	2224587	http://genome.ucsc.edu/cgi-bin/hgTracks?db=hg19&position=chr4:158083905-160408491&hgsid=443362677_4V80BwZqd7j9QbFDPX1nAl3yp6cs
4	160359119	168978170	280	-0.9859	8619052	http://genome.ucsc.edu/cgi-bin/hgTracks?db=hg19&position=chr4:160309119-169028170&hgsid=443362677_4V80BwZqd7j9QbFDPX1nAl3yp6cs
4	169014752	170680315	81	-0.1025	1665564	http://genome.ucsc.edu/cgi-bin/hgTracks?db=hg19&position=chr4:168964752-170730315&hgsid=443362677_4V80BwZqd7j9QbFDPX1nAl3yp6cs
4	170682020	183984527	460	-0.9028	13302508	http://genome.ucsc.edu/cgi-bin/hgTracks?db=hg19&position=chr4:170632020-184034527&hgsid=443362677_4V80BwZqd7j9QbFDPX1nAl3yp6cs
4	183986343	189254532	366	-0.5186	5268190	http://genome.ucsc.edu/cgi-bin/hgTracks?db=hg19&position=chr4:183936343-189304532&hgsid=443362677_4V80BwZqd7j9QbFDPX1nAl3yp6cs
4	189259180	190974285	80	-1.1029	1715106	http://genome.ucsc.edu/cgi-bin/hgTracks?db=hg19&position=chr4:189209180-191024285&hgsid=443362677_4V80BwZqd7j9QbFDPX1nAl3yp6cs
5	28689	1728837	51	-0.3925	1700149	http://genome.ucsc.edu/cgi-bin/hgTracks?db=hg19&position=chr5:-21311-1778837&hgsid=443362677_4V80BwZqd7j9QbFDPX1nAl3yp6cs
5	1757158	10962079	257	-0.8169	9204922	http://genome.ucsc.edu/cgi-bin/hgTracks?db=hg19&position=chr5:1707158-11012079&hgsid=443362677_4V80BwZqd7j9QbFDPX1nAl3yp6cs
5	10985110	11798298	21	-1.7923	813189	http://genome.ucsc.edu/cgi-bin/hgTracks?db=hg19&position=chr5:10935110-11848298&hgsid=443362677_4V80BwZqd7j9QbFDPX1nAl3yp6cs
5	11865099	16085973	121	-0.8147	4220875	http://genome.ucsc.edu/cgi-bin/hgTracks?db=hg19&position=chr5:11815099-16135973&hgsid=443362677_4V80BwZqd7j9QbFDPX1nAl3yp6cs
5	16303644	17792783	115	-0.3392	1489140	http://genome.ucsc.edu/cgi-bin/hgTracks?db=hg19&position=chr5:16253644-17842783&hgsid=443362677_4V80BwZqd7j9QbFDPX1nAl3yp6cs
5	17804946	32080378	497	-1.0062	14275433	http://genome.ucsc.edu/cgi-bin/hgTracks?db=hg19&position=chr5:17754946-32130378&hgsid=443362677_4V80BwZqd7j9QbFDPX1nAl3yp6cs
5	32098288	43850741	484	-0.5519	11752454	http://genome.ucsc.edu/cgi-bin/hgTracks?db=hg19&position=chr5:32048288-43900741&hgsid=443362677_4V80BwZqd7j9QbFDPX1nAl3yp6cs
5	44209423	46164323	35	-1.2979	1954901	http://genome.ucsc.edu/cgi-bin/hgTracks?db=hg19&position=chr5:44159423-46214323&hgsid=443362677_4V80BwZqd7j9QbFDPX1nAl3yp6cs
5	49486520	82605507	1349	-0.4411	33118988	http://genome.ucsc.edu/cgi-bin/hgTracks?db=hg19&position=chr5:49436520-82655507&hgsid=443362677_4V80BwZqd7j9QbFDPX1nAl3yp6cs
5	82691919	85644342	75	-1.2287	2952424	http://genome.ucsc.edu/cgi-bin/hgTracks?db=hg19&position=chr5:82641919-85694342&hgsid=443362677_4V80BwZqd7j9QbFDPX1nAl3yp6cs
5	85742574	104388801	494	-0.6135	18646228	http://genome.ucsc.edu/cgi-bin/hgTracks?db=hg19&position=chr5:85692574-104438801&hgsid=443362677_4V80BwZqd7j9QbFDPX1nAl3yp6cs
5	104405798	106827105	57	-1.3265	2421308	http://genome.ucsc.edu/cgi-bin/hgTracks?db=hg19&position=chr5:104355798-106877105&hgsid=443362677_4V80BwZqd7j9QbFDPX1nAl3yp6cs
5	106875252	161142434	2213	-0.5157	54267183	http://genome.ucsc.edu/cgi-bin/hgTracks?db=hg19&position=chr5:106825252-161192434&hgsid=443362677_4V80BwZqd7j9QbFDPX1nAl3yp6cs
5	161148844	167280219	230	-1.133	6131376	http://genome.ucsc.edu/cgi-bin/hgTracks?db=hg19&position=chr5:161098844-167330219&hgsid=443362677_4V80BwZqd7j9QbFDPX1nAl3yp6cs
5	167347447	168168400	40	-0.1699	820954	http://genome.ucsc.edu/cgi-bin/hgTracks?db=hg19&position=chr5:167297447-168218400&hgsid=443362677_4V80BwZqd7j9QbFDPX1nAl3yp6cs
5	168178835	170270558	61	-1.0658	2091724	http://genome.ucsc.edu/cgi-bin/hgTracks?db=hg19&position=chr5:168128835-170320558&hgsid=443362677_4V80BwZqd7j9QbFDPX1nAl3yp6cs
5	170292159	178342755	614	-0.4738	8050597	http://genome.ucsc.edu/cgi-bin/hgTracks?db=hg19&position=chr5:170242159-178392755&hgsid=443362677_4V80BwZqd7j9QbFDPX1nAl3yp6cs
5	178344540	178901652	40	-1.1476	557113	http://genome.ucsc.edu/cgi-bin/hgTracks?db=hg19&position=chr5:178294540-178951652&hgsid=443362677_4V80BwZqd7j9QbFDPX1nAl3yp6cs
5	178915128	180706713	214	-0.4103	1791586	http://genome.ucsc.edu/cgi-bin/hgTracks?db=hg19&position=chr5:178865128-180756713&hgsid=443362677_4V80BwZqd7j9QbFDPX1nAl3yp6cs
6	132520	8650245	395	-0.4442	8517726	http://genome.ucsc.edu/cgi-bin/hgTracks?db=hg19&position=chr6:82520-8700245&hgsid=443362677_4V80BwZqd7j9QbFDPX1nAl3yp6cs
6	8678713	10651577	84	-1.1274	1972865	http://genome.ucsc.edu/cgi-bin/hgTracks?db=hg19&position=chr6:8628713-10701577&hgsid=443362677_4V80BwZqd7j9QbFDPX1nAl3yp6cs
6	10677857	23104545	738	-0.5412	12426689	http://genome.ucsc.edu/cgi-bin/hgTracks?db=hg19&position=chr6:10627857-23154545&hgsid=443362677_4V80BwZqd7j9QbFDPX1nAl3yp6cs
6	23119204	24180106	28	-1.4686	1060903	http://genome.ucsc.edu/cgi-bin/hgTracks?db=hg19&position=chr6:23069204-24230106&hgsid=443362677_4V80BwZqd7j9QbFDPX1nAl3yp6cs
6	24238619	28236815	301	-0.4702	3998197	http://genome.ucsc.edu/cgi-bin/hgTracks?db=hg19&position=chr6:24188619-28286815&hgsid=443362677_4V80BwZqd7j9QbFDPX1nAl3yp6cs
6	28311413	33473182	420	-1.052	5161770	http://genome.ucsc.edu/cgi-bin/hgTracks?db=hg19&position=chr6:28261413-33523182&hgsid=443362677_4V80BwZqd7j9QbFDPX1nAl3yp6cs
6	33476140	49561578	1029	-0.5518	16085439	http://genome.ucsc.edu/cgi-bin/hgTracks?db=hg19&position=chr6:33426140-49611578&hgsid=443362677_4V80BwZqd7j9QbFDPX1nAl3yp6cs
6	49579547	50533610	31	-1.8628	954064	http://genome.ucsc.edu/cgi-bin/hgTracks?db=hg19&position=chr6:49529547-50583610&hgsid=443362677_4V80BwZqd7j9QbFDPX1nAl3yp6cs
6	50577667	58674548	262	-0.6854	8096882	http://genome.ucsc.edu/cgi-bin/hgTracks?db=hg19&position=chr6:50527667-58724548&hgsid=443362677_4V80BwZqd7j9QbFDPX1nAl3yp6cs
6	62041228	73446315	268	-0.9715	11405088	http://genome.ucsc.edu/cgi-bin/hgTracks?db=hg19&position=chr6:61991228-73496315&hgsid=443362677_4V80BwZqd7j9QbFDPX1nAl3yp6cs
6	73446776	92629839	640	-0.6535	19183064	http://genome.ucsc.edu/cgi-bin/hgTracks?db=hg19&position=chr6:73396776-92679839&hgsid=443362677_4V80BwZqd7j9QbFDPX1nAl3yp6cs
6	92658962	105814056	356	-0.9927	13155095	http://genome.ucsc.edu/cgi-bin/hgTracks?db=hg19&position=chr6:92608962-105864056&hgsid=443362677_4V80BwZqd7j9QbFDPX1nAl3yp6cs
6	105815471	112679768	399	-0.3904	6864298	http://genome.ucsc.edu/cgi-bin/hgTracks?db=hg19&position=chr6:105765471-112729768&hgsid=443362677_4V80BwZqd7j9QbFDPX1nAl3yp6cs
6	112699502	115849822	75	-0.9958	3150321	http://genome.ucsc.edu/cgi-bin/hgTracks?db=hg19&position=chr6:112649502-115899822&hgsid=443362677_4V80BwZqd7j9QbFDPX1nAl3yp6cs
6	115996159	118224272	60	-0.5776	2228114	http://genome.ucsc.edu/cgi-bin/hgTracks?db=hg19&position=chr6:115946159-118274272&hgsid=443362677_4V80BwZqd7j9QbFDPX1nAl3yp6cs
6	118298452	126002606	254	-1.1184	7704155	http://genome.ucsc.edu/cgi-bin/hgTracks?db=hg19&position=chr6:118248452-126052606&hgsid=443362677_4V80BwZqd7j9QbFDPX1nAl3yp6cs
6	126039756	152556589	1087	-0.5781	26516834	http://genome.ucsc.edu/cgi-bin/hgTracks?db=hg19&position=chr6:125989756-152606589&hgsid=443362677_4V80BwZqd7j9QbFDPX1nAl3yp6cs
6	152575479	154062779	59	-1.3259	1487301	http://genome.ucsc.edu/cgi-bin/hgTracks?db=hg19&position=chr6:152525479-154112779&hgsid=443362677_4V80BwZqd7j9QbFDPX1nAl3yp6cs
6	154108244	163141575	477	-0.5647	9033332	http://genome.ucsc.edu/cgi-bin/hgTracks?db=hg19&position=chr6:154058244-163191575&hgsid=443362677_4V80BwZqd7j9QbFDPX1nAl3yp6cs
6	163160798	166487049	94	-1.1871	3326252	http://genome.ucsc.edu/cgi-bin/hgTracks?db=hg19&position=chr6:163110798-166537049&hgsid=443362677_4V80BwZqd7j9QbFDPX1nAl3yp6cs
6	166505709	170866748	140	-0.6175	4361040	http://genome.ucsc.edu/cgi-bin/hgTracks?db=hg19&position=chr6:166455709-170916748&hgsid=443362677_4V80BwZqd7j9QbFDPX1nAl3yp6cs
7	28262	1207842	57	-0.2117	1179581	http://genome.ucsc.edu/cgi-bin/hgTracks?db=hg19&position=chr7:-21738-1257842&hgsid=443362677_4V80BwZqd7j9QbFDPX1nAl3yp6cs
7	1213306	1840311	41	-1.1704	627006	http://genome.ucsc.edu/cgi-bin/hgTracks?db=hg19&position=chr7:1163306-1890311&hgsid=443362677_4V80BwZqd7j9QbFDPX1nAl3yp6cs
7	1842985	2897699	81	-0.3276	1054715	http://genome.ucsc.edu/cgi-bin/hgTracks?db=hg19&position=chr7:1792985-2947699&hgsid=443362677_4V80BwZqd7j9QbFDPX1nAl3yp6cs
7	2907239	4539163	107	-1.0115	1631925	http://genome.ucsc.edu/cgi-bin/hgTracks?db=hg19&position=chr7:2857239-4589163&hgsid=443362677_4V80BwZqd7j9QbFDPX1nAl3yp6cs
7	4553811	18872451	692	-0.4776	14318641	http://genome.ucsc.edu/cgi-bin/hgTracks?db=hg19&position=chr7:4503811-18922451&hgsid=443362677_4V80BwZqd7j9QbFDPX1nAl3yp6cs
7	18927972	19707320	26	-1.6214	779349	http://genome.ucsc.edu/cgi-bin/hgTracks?db=hg19&position=chr7:18877972-19757320&hgsid=443362677_4V80BwZqd7j9QbFDPX1nAl3yp6cs
7	19727064	22895447	114	-0.5014	3168384	http://genome.ucsc.edu/cgi-bin/hgTracks?db=hg19&position=chr7:19677064-22945447&hgsid=443362677_4V80BwZqd7j9QbFDPX1nAl3yp6cs
7	22897262	23035836	10	-2.2376	138575	http://genome.ucsc.edu/cgi-bin/hgTracks?db=hg19&position=chr7:22847262-23085836&hgsid=443362677_4V80BwZqd7j9QbFDPX1nAl3yp6cs
7	23044517	51426446	1190	-0.5199	28381930	http://genome.ucsc.edu/cgi-bin/hgTracks?db=hg19&position=chr7:22994517-51476446&hgsid=443362677_4V80BwZqd7j9QbFDPX1nAl3yp6cs
7	51438334	54778200	91	-1.176	3339867	http://genome.ucsc.edu/cgi-bin/hgTracks?db=hg19&position=chr7:51388334-54828200&hgsid=443362677_4V80BwZqd7j9QbFDPX1nAl3yp6cs
7	54781591	56505967	147	-0.4901	1724377	http://genome.ucsc.edu/cgi-bin/hgTracks?db=hg19&position=chr7:54731591-56555967&hgsid=443362677_4V80BwZqd7j9QbFDPX1nAl3yp6cs
7	56516756	56669964	19	-1.5981	153209	http://genome.ucsc.edu/cgi-bin/hgTracks?db=hg19&position=chr7:56466756-56719964&hgsid=443362677_4V80BwZqd7j9QbFDPX1nAl3yp6cs
7	56672335	57873380	79	-0.5133	1201046	http://genome.ucsc.edu/cgi-bin/hgTracks?db=hg19&position=chr7:56622335-57923380&hgsid=443362677_4V80BwZqd7j9QbFDPX1nAl3yp6cs
7	61060852	66876403	418	-0.3764	5815552	http://genome.ucsc.edu/cgi-bin/hgTracks?db=hg19&position=chr7:61010852-66926403&hgsid=443362677_4V80BwZqd7j9QbFDPX1nAl3yp6cs
7	66885392	71873354	366	-0.9321	4987963	http://genome.ucsc.edu/cgi-bin/hgTracks?db=hg19&position=chr7:66835392-71923354&hgsid=443362677_4V80BwZqd7j9QbFDPX1nAl3yp6cs
7	71885701	89120415	915	-0.4285	17234715	http://genome.ucsc.edu/cgi-bin/hgTracks?db=hg19&position=chr7:71835701-89170415&hgsid=443362677_4V80BwZqd7j9QbFDPX1nAl3yp6cs
7	89374770	89464010	6	-2.3428	89241	http://genome.ucsc.edu/cgi-bin/hgTracks?db=hg19&position=chr7:89324770-89514010&hgsid=443362677_4V80BwZqd7j9QbFDPX1nAl3yp6cs
7	89471157	112764502	1162	-0.4451	23293346	http://genome.ucsc.edu/cgi-bin/hgTracks?db=hg19&position=chr7:89421157-112814502&hgsid=443362677_4V80BwZqd7j9QbFDPX1nAl3yp6cs
7	112767760	116501312	90	-1.0726	3733553	http://genome.ucsc.edu/cgi-bin/hgTracks?db=hg19&position=chr7:112717760-116551312&hgsid=443362677_4V80BwZqd7j9QbFDPX1nAl3yp6cs
7	116510016	135626724	743	-0.4285	19116709	http://genome.ucsc.edu/cgi-bin/hgTracks?db=hg19&position=chr7:116460016-135676724&hgsid=443362677_4V80BwZqd7j9QbFDPX1nAl3yp6cs
7	135704543	136785938	28	-1.4723	1081396	http://genome.ucsc.edu/cgi-bin/hgTracks?db=hg19&position=chr7:135654543-136835938&hgsid=443362677_4V80BwZqd7j9QbFDPX1nAl3yp6cs
7	136834557	144818826	447	-0.4156	7984270	http://genome.ucsc.edu/cgi-bin/hgTracks?db=hg19&position=chr7:136784557-144868826&hgsid=443362677_4V80BwZqd7j9QbFDPX1nAl3yp6cs
7	144853302	147822886	122	-1.1205	2969585	http://genome.ucsc.edu/cgi-bin/hgTracks?db=hg19&position=chr7:144803302-147872886&hgsid=443362677_4V80BwZqd7j9QbFDPX1nAl3yp6cs
7	147828283	159109010	615	-0.463	11280728	http://genome.ucsc.edu/cgi-bin/hgTracks?db=hg19&position=chr7:147778283-159159010&hgsid=443362677_4V80BwZqd7j9QbFDPX1nAl3yp6cs
8	207053	9671524	379	-0.2492	9464472	http://genome.ucsc.edu/cgi-bin/hgTracks?db=hg19&position=chr8:157053-9721524&hgsid=443362677_4V80BwZqd7j9QbFDPX1nAl3yp6cs
8	9680825	9835333	9	-1.5277	154509	http://genome.ucsc.edu/cgi-bin/hgTracks?db=hg19&position=chr8:9630825-9885333&hgsid=443362677_4V80BwZqd7j9QbFDPX1nAl3yp6cs
8	9844636	43801451	1546	-0.3128	33956816	http://genome.ucsc.edu/cgi-bin/hgTracks?db=hg19&position=chr8:9794636-43851451&hgsid=443362677_4V80BwZqd7j9QbFDPX1nAl3yp6cs
8	46864127	49820625	114	-0.5854	2956499	http://genome.ucsc.edu/cgi-bin/hgTracks?db=hg19&position=chr8:46814127-49870625&hgsid=443362677_4V80BwZqd7j9QbFDPX1nAl3yp6cs
8	49982418	52621907	65	-1.5363	2639490	http://genome.ucsc.edu/cgi-bin/hgTracks?db=hg19&position=chr8:49932418-52671907&hgsid=443362677_4V80BwZqd7j9QbFDPX1nAl3yp6cs
8	52655870	55076851	129	-0.5272	2420982	http://genome.ucsc.edu/cgi-bin/hgTracks?db=hg19&position=chr8:52605870-55126851&hgsid=443362677_4V80BwZqd7j9QbFDPX1nAl3yp6cs
8	55080257	60848242	205	-1.1187	5767986	http://genome.ucsc.edu/cgi-bin/hgTracks?db=hg19&position=chr8:55030257-60898242&hgsid=443362677_4V80BwZqd7j9QbFDPX1nAl3yp6cs
8	61022255	64255000	85	-0.4928	3232746	http://genome.ucsc.edu/cgi-bin/hgTracks?db=hg19&position=chr8:60972255-64305000&hgsid=443362677_4V80BwZqd7j9QbFDPX1nAl3yp6cs
8	64257976	66375244	45	-1.5333	2117269	http://genome.ucsc.edu/cgi-bin/hgTracks?db=hg19&position=chr8:64207976-66425244&hgsid=443362677_4V80BwZqd7j9QbFDPX1nAl3yp6cs
8	66418440	77125363	407	-0.6456	10706924	http://genome.ucsc.edu/cgi-bin/hgTracks?db=hg19&position=chr8:66368440-77175363&hgsid=443362677_4V80BwZqd7j9QbFDPX1nAl3yp6cs
8	77209357	80815176	52	-1.303	3605820	http://genome.ucsc.edu/cgi-bin/hgTracks?db=hg19&position=chr8:77159357-80865176&hgsid=443362677_4V80BwZqd7j9QbFDPX1nAl3yp6cs
8	80818086	83323413	101	-0.5213	2505328	http://genome.ucsc.edu/cgi-bin/hgTracks?db=hg19&position=chr8:80768086-83373413&hgsid=443362677_4V80BwZqd7j9QbFDPX1nAl3yp6cs
8	83332793	85761886	49	-1.6782	2429094	http://genome.ucsc.edu/cgi-bin/hgTracks?db=hg19&position=chr8:83282793-85811886&hgsid=443362677_4V80BwZqd7j9QbFDPX1nAl3yp6cs
8	85769187	87896304	86	-0.7313	2127118	http://genome.ucsc.edu/cgi-bin/hgTracks?db=hg19&position=chr8:85719187-87946304&hgsid=443362677_4V80BwZqd7j9QbFDPX1nAl3yp6cs
8	87990863	89630992	42	-1.8209	1640130	http://genome.ucsc.edu/cgi-bin/hgTracks?db=hg19&position=chr8:87940863-89680992&hgsid=443362677_4V80BwZqd7j9QbFDPX1nAl3yp6cs
8	89651299	96360961	221	-0.5241	6709663	http://genome.ucsc.edu/cgi-bin/hgTracks?db=hg19&position=chr8:89601299-96410961&hgsid=443362677_4V80BwZqd7j9QbFDPX1nAl3yp6cs
8	96397786	97192206	22	-1.6683	794421	http://genome.ucsc.edu/cgi-bin/hgTracks?db=hg19&position=chr8:96347786-97242206&hgsid=443362677_4V80BwZqd7j9QbFDPX1nAl3yp6cs
8	97209654	103968122	360	-0.525	6758469	http://genome.ucsc.edu/cgi-bin/hgTracks?db=hg19&position=chr8:97159654-104018122&hgsid=443362677_4V80BwZqd7j9QbFDPX1nAl3yp6cs
8	103970690	118480443	395	-1.1755	14509754	http://genome.ucsc.edu/cgi-bin/hgTracks?db=hg19&position=chr8:103920690-118530443&hgsid=443362677_4V80BwZqd7j9QbFDPX1nAl3yp6cs
8	118532346	131820154	561	-0.5873	13287809	http://genome.ucsc.edu/cgi-bin/hgTracks?db=hg19&position=chr8:118482346-131870154&hgsid=443362677_4V80BwZqd7j9QbFDPX1nAl3yp6cs
8	131911776	132830007	17	-2.0263	918232	http://genome.ucsc.edu/cgi-bin/hgTracks?db=hg19&position=chr8:131861776-132880007&hgsid=443362677_4V80BwZqd7j9QbFDPX1nAl3yp6cs
8	132920400	140320898	193	-1.0686	7400499	http://genome.ucsc.edu/cgi-bin/hgTracks?db=hg19&position=chr8:132870400-140370898&hgsid=443362677_4V80BwZqd7j9QbFDPX1nAl3yp6cs
8	140383037	143893317	128	-0.5517	3510281	http://genome.ucsc.edu/cgi-bin/hgTracks?db=hg19&position=chr8:140333037-143943317&hgsid=443362677_4V80BwZqd7j9QbFDPX1nAl3yp6cs
8	143907538	144202810	21	-1.8053	295273	http://genome.ucsc.edu/cgi-bin/hgTracks?db=hg19&position=chr8:143857538-144252810&hgsid=443362677_4V80BwZqd7j9QbFDPX1nAl3yp6cs
8	144245688	146297866	144	-0.6177	2052179	http://genome.ucsc.edu/cgi-bin/hgTracks?db=hg19&position=chr8:144195688-146347866&hgsid=443362677_4V80BwZqd7j9QbFDPX1nAl3yp6cs
9	119529	8904596	370	-0.6169	8785068	http://genome.ucsc.edu/cgi-bin/hgTracks?db=hg19&position=chr9:69529-8954596&hgsid=443362677_4V80BwZqd7j9QbFDPX1nAl3yp6cs
9	8922739	26950234	542	-1.0478	18027496	http://genome.ucsc.edu/cgi-bin/hgTracks?db=hg19&position=chr9:8872739-27000234&hgsid=443362677_4V80BwZqd7j9QbFDPX1nAl3yp6cs
9	26968352	27886313	32	-0.3697	917962	http://genome.ucsc.edu/cgi-bin/hgTracks?db=hg19&position=chr9:26918352-27936313&hgsid=443362677_4V80BwZqd7j9QbFDPX1nAl3yp6cs
9	27911753	32019072	86	-1.4401	4107320	http://genome.ucsc.edu/cgi-bin/hgTracks?db=hg19&position=chr9:27861753-32069072&hgsid=443362677_4V80BwZqd7j9QbFDPX1nAl3yp6cs
9	32060569	47266171	693	-0.6017	15205603	http://genome.ucsc.edu/cgi-bin/hgTracks?db=hg19&position=chr9:32010569-47316171&hgsid=443362677_4V80BwZqd7j9QbFDPX1nAl3yp6cs
9	65525248	83206470	598	-0.3151	17681223	http://genome.ucsc.edu/cgi-bin/hgTracks?db=hg19&position=chr9:65475248-83256470&hgsid=443362677_4V80BwZqd7j9QbFDPX1nAl3yp6cs
9	83243171	83751677	14	-1.3856	508507	http://genome.ucsc.edu/cgi-bin/hgTracks?db=hg19&position=chr9:83193171-83801677&hgsid=443362677_4V80BwZqd7j9QbFDPX1nAl3yp6cs
9	83801963	94155409	547	-0.3451	10353447	http://genome.ucsc.edu/cgi-bin/hgTracks?db=hg19&position=chr9:83751963-94205409&hgsid=443362677_4V80BwZqd7j9QbFDPX1nAl3yp6cs
9	94163354	94216440	3	-2.8405	53087	http://genome.ucsc.edu/cgi-bin/hgTracks?db=hg19&position=chr9:94113354-94266440&hgsid=443362677_4V80BwZqd7j9QbFDPX1nAl3yp6cs
9	94244874	104297282	570	-0.1871	10052409	http://genome.ucsc.edu/cgi-bin/hgTracks?db=hg19&position=chr9:94194874-104347282&hgsid=443362677_4V80BwZqd7j9QbFDPX1nAl3yp6cs
9	104346231	107004587	52	-0.8234	2658357	http://genome.ucsc.edu/cgi-bin/hgTracks?db=hg19&position=chr9:104296231-107054587&hgsid=443362677_4V80BwZqd7j9QbFDPX1nAl3yp6cs
9	107043672	141067511	2110	-0.248	34023840	http://genome.ucsc.edu/cgi-bin/hgTracks?db=hg19&position=chr9:106993672-141117511&hgsid=443362677_4V80BwZqd7j9QbFDPX1nAl3yp6cs
10	77523	39060663	2073	-0.5093	38983141	http://genome.ucsc.edu/cgi-bin/hgTracks?db=hg19&position=chr10:27523-39110663&hgsid=443362677_4V80BwZqd7j9QbFDPX1nAl3yp6cs
10	42700411	83187779	1608	-0.4311	40487369	http://genome.ucsc.edu/cgi-bin/hgTracks?db=hg19&position=chr10:42650411-83237779&hgsid=443362677_4V80BwZqd7j9QbFDPX1nAl3yp6cs
10	83202062	85616563	64	-1.2758	2414502	http://genome.ucsc.edu/cgi-bin/hgTracks?db=hg19&position=chr10:83152062-85666563&hgsid=443362677_4V80BwZqd7j9QbFDPX1nAl3yp6cs
10	85626295	106098759	1154	-0.3979	20472465	http://genome.ucsc.edu/cgi-bin/hgTracks?db=hg19&position=chr10:85576295-106148759&hgsid=443362677_4V80BwZqd7j9QbFDPX1nAl3yp6cs
10	106164460	111293341	142	-1.0246	5128882	http://genome.ucsc.edu/cgi-bin/hgTracks?db=hg19&position=chr10:106114460-111343341&hgsid=443362677_4V80BwZqd7j9QbFDPX1nAl3yp6cs
10	111487901	116815747	227	-0.342	5327847	http://genome.ucsc.edu/cgi-bin/hgTracks?db=hg19&position=chr10:111437901-116865747&hgsid=443362677_4V80BwZqd7j9QbFDPX1nAl3yp6cs
10	116816746	118233126	50	-1.231	1416381	http://genome.ucsc.edu/cgi-bin/hgTracks?db=hg19&position=chr10:116766746-118283126&hgsid=443362677_4V80BwZqd7j9QbFDPX1nAl3yp6cs
10	118238991	135450221	690	-0.4773	17211231	http://genome.ucsc.edu/cgi-bin/hgTracks?db=hg19&position=chr10:118188991-135500221&hgsid=443362677_4V80BwZqd7j9QbFDPX1nAl3yp6cs
11	162894	20534076	906	-0.3459	20371183	http://genome.ucsc.edu/cgi-bin/hgTracks?db=hg19&position=chr11:112894-20584076&hgsid=443362677_4V80BwZqd7j9QbFDPX1nAl3yp6cs
11	20579786	27275650	150	-0.8886	6695865	http://genome.ucsc.edu/cgi-bin/hgTracks?db=hg19&position=chr11:20529786-27325650&hgsid=443362677_4V80BwZqd7j9QbFDPX1nAl3yp6cs
11	27307993	28375396	36	-0.109	1067404	http://genome.ucsc.edu/cgi-bin/hgTracks?db=hg19&position=chr11:27257993-28425396&hgsid=443362677_4V80BwZqd7j9QbFDPX1nAl3yp6cs
11	28617739	32573849	116	-0.9071	3956111	http://genome.ucsc.edu/cgi-bin/hgTracks?db=hg19&position=chr11:28567739-32623849&hgsid=443362677_4V80BwZqd7j9QbFDPX1nAl3yp6cs
11	32583240	35411110	145	-0.2777	2827871	http://genome.ucsc.edu/cgi-bin/hgTracks?db=hg19&position=chr11:32533240-35461110&hgsid=443362677_4V80BwZqd7j9QbFDPX1nAl3yp6cs
11	35515974	35930365	12	-1.3943	414392	http://genome.ucsc.edu/cgi-bin/hgTracks?db=hg19&position=chr11:35465974-35980365&hgsid=443362677_4V80BwZqd7j9QbFDPX1nAl3yp6cs
11	35943468	37224054	38	-0.3427	1280587	http://genome.ucsc.edu/cgi-bin/hgTracks?db=hg19&position=chr11:35893468-37274054&hgsid=443362677_4V80BwZqd7j9QbFDPX1nAl3yp6cs
11	37384626	42373009	156	-1.0744	4988384	http://genome.ucsc.edu/cgi-bin/hgTracks?db=hg19&position=chr11:37334626-42423009&hgsid=443362677_4V80BwZqd7j9QbFDPX1nAl3yp6cs
11	42411351	51476568	466	-0.43	9065218	http://genome.ucsc.edu/cgi-bin/hgTracks?db=hg19&position=chr11:42361351-51526568&hgsid=443362677_4V80BwZqd7j9QbFDPX1nAl3yp6cs
11	55078389	64176309	576	-0.4431	9097921	http://genome.ucsc.edu/cgi-bin/hgTracks?db=hg19&position=chr11:55028389-64226309&hgsid=443362677_4V80BwZqd7j9QbFDPX1nAl3yp6cs
11	64184358	64430178	10	-1.8439	245821	http://genome.ucsc.edu/cgi-bin/hgTracks?db=hg19&position=chr11:64134358-64480178&hgsid=443362677_4V80BwZqd7j9QbFDPX1nAl3yp6cs
11	64432677	96219901	1518	-0.4002	31787225	http://genome.ucsc.edu/cgi-bin/hgTracks?db=hg19&position=chr11:64382677-96269901&hgsid=443362677_4V80BwZqd7j9QbFDPX1nAl3yp6cs
11	96233338	98558020	71	-1.2444	2324683	http://genome.ucsc.edu/cgi-bin/hgTracks?db=hg19&position=chr11:96183338-98608020&hgsid=443362677_4V80BwZqd7j9QbFDPX1nAl3yp6cs
11	98579822	102548695	135	-0.5169	3968874	http://genome.ucsc.edu/cgi-bin/hgTracks?db=hg19&position=chr11:98529822-102598695&hgsid=443362677_4V80BwZqd7j9QbFDPX1nAl3yp6cs
11	102551459	107637282	136	-0.956	5085824	http://genome.ucsc.edu/cgi-bin/hgTracks?db=hg19&position=chr11:102501459-107687282&hgsid=443362677_4V80BwZqd7j9QbFDPX1nAl3yp6cs
11	107640595	117243224	435	-0.4639	9602630	http://genome.ucsc.edu/cgi-bin/hgTracks?db=hg19&position=chr11:107590595-117293224&hgsid=443362677_4V80BwZqd7j9QbFDPX1nAl3yp6cs
11	117294395	117323743	3	-3.4162	29349	http://genome.ucsc.edu/cgi-bin/hgTracks?db=hg19&position=chr11:117244395-117373743&hgsid=443362677_4V80BwZqd7j9QbFDPX1nAl3yp6cs
11	117337341	121701848	236	-0.4673	4364508	http://genome.ucsc.edu/cgi-bin/hgTracks?db=hg19&position=chr11:117287341-121751848&hgsid=443362677_4V80BwZqd7j9QbFDPX1nAl3yp6cs
11	121782643	122840973	61	-1.2839	1058331	http://genome.ucsc.edu/cgi-bin/hgTracks?db=hg19&position=chr11:121732643-122890973&hgsid=443362677_4V80BwZqd7j9QbFDPX1nAl3yp6cs
11	122849606	134939114	438	-0.6148	12089509	http://genome.ucsc.edu/cgi-bin/hgTracks?db=hg19&position=chr11:122799606-134989114&hgsid=443362677_4V80BwZqd7j9QbFDPX1nAl3yp6cs
12	164714	19993094	1140	-0.4117	19828381	http://genome.ucsc.edu/cgi-bin/hgTracks?db=hg19&position=chr12:114714-20043094&hgsid=443362677_4V80BwZqd7j9QbFDPX1nAl3yp6cs
12	20055714	26179461	208	-0.8577	6123748	http://genome.ucsc.edu/cgi-bin/hgTracks?db=hg19&position=chr12:20005714-26229461&hgsid=443362677_4V80BwZqd7j9QbFDPX1nAl3yp6cs
12	26226596	34409543	437	-0.344	8182948	http://genome.ucsc.edu/cgi-bin/hgTracks?db=hg19&position=chr12:26176596-34459543&hgsid=443362677_4V80BwZqd7j9QbFDPX1nAl3yp6cs
12	37908243	72986583	1826	-0.4066	35078341	http://genome.ucsc.edu/cgi-bin/hgTracks?db=hg19&position=chr12:37858243-73036583&hgsid=443362677_4V80BwZqd7j9QbFDPX1nAl3yp6cs
12	73092492	74930555	32	-1.3593	1838064	http://genome.ucsc.edu/cgi-bin/hgTracks?db=hg19&position=chr12:73042492-74980555&hgsid=443362677_4V80BwZqd7j9QbFDPX1nAl3yp6cs
12	74941696	103649755	1106	-0.5062	28708060	http://genome.ucsc.edu/cgi-bin/hgTracks?db=hg19&position=chr12:74891696-103699755&hgsid=443362677_4V80BwZqd7j9QbFDPX1nAl3yp6cs
12	103671490	103906704	7	-2.2967	235215	http://genome.ucsc.edu/cgi-bin/hgTracks?db=hg19&position=chr12:103621490-103956704&hgsid=443362677_4V80BwZqd7j9QbFDPX1nAl3yp6cs
12	103934774	125996322	1748	-0.4111	22061549	http://genome.ucsc.edu/cgi-bin/hgTracks?db=hg19&position=chr12:103884774-126046322&hgsid=443362677_4V80BwZqd7j9QbFDPX1nAl3yp6cs
12	126041393	131236878	241	-0.8274	5195486	http://genome.ucsc.edu/cgi-bin/hgTracks?db=hg19&position=chr12:125991393-131286878&hgsid=443362677_4V80BwZqd7j9QbFDPX1nAl3yp6cs
12	131240576	133813968	193	-0.3858	2573393	http://genome.ucsc.edu/cgi-bin/hgTracks?db=hg19&position=chr12:131190576-133863968&hgsid=443362677_4V80BwZqd7j9QbFDPX1nAl3yp6cs
13	19138503	23697610	318	-1.009	4559108	http://genome.ucsc.edu/cgi-bin/hgTracks?db=hg19&position=chr13:19088503-23747610&hgsid=443362677_4V80BwZqd7j9QbFDPX1nAl3yp6cs
13	23711824	23987209	23	-2.5605	275386	http://genome.ucsc.edu/cgi-bin/hgTracks?db=hg19&position=chr13:23661824-24037209&hgsid=443362677_4V80BwZqd7j9QbFDPX1nAl3yp6cs
13	23998588	96810831	2563	-1.2976	72812244	http://genome.ucsc.edu/cgi-bin/hgTracks?db=hg19&position=chr13:23948588-96860831&hgsid=443362677_4V80BwZqd7j9QbFDPX1nAl3yp6cs
13	96815576	97261316	13	-2.7215	445741	http://genome.ucsc.edu/cgi-bin/hgTracks?db=hg19&position=chr13:96765576-97311316&hgsid=443362677_4V80BwZqd7j9QbFDPX1nAl3yp6cs
13	97266476	115098018	653	-1.0338	17831543	http://genome.ucsc.edu/cgi-bin/hgTracks?db=hg19&position=chr13:97216476-115148018&hgsid=443362677_4V80BwZqd7j9QbFDPX1nAl3yp6cs
14	19073224	81991142	2934	-0.2719	62917919	http://genome.ucsc.edu/cgi-bin/hgTracks?db=hg19&position=chr14:19023224-82041142&hgsid=443362677_4V80BwZqd7j9QbFDPX1nAl3yp6cs
14	82005427	88645179	180	-0.7341	6639753	http://genome.ucsc.edu/cgi-bin/hgTracks?db=hg19&position=chr14:81955427-88695179&hgsid=443362677_4V80BwZqd7j9QbFDPX1nAl3yp6cs
14	88663842	107287357	1081	-0.2693	18623516	http://genome.ucsc.edu/cgi-bin/hgTracks?db=hg19&position=chr14:88613842-107337357&hgsid=443362677_4V80BwZqd7j9QbFDPX1nAl3yp6cs
15	20046528	22509642	41	-0.7952	2463115	http://genome.ucsc.edu/cgi-bin/hgTracks?db=hg19&position=chr15:19996528-22559642&hgsid=443362677_4V80BwZqd7j9QbFDPX1nAl3yp6cs
15	22530320	45816172	1452	-0.2285	23285853	http://genome.ucsc.edu/cgi-bin/hgTracks?db=hg19&position=chr15:22480320-45866172&hgsid=443362677_4V80BwZqd7j9QbFDPX1nAl3yp6cs
15	45828722	48653528	80	-1.0235	2824807	http://genome.ucsc.edu/cgi-bin/hgTracks?db=hg19&position=chr15:45778722-48703528&hgsid=443362677_4V80BwZqd7j9QbFDPX1nAl3yp6cs
15	48678298	60775214	619	-0.5173	12096917	http://genome.ucsc.edu/cgi-bin/hgTracks?db=hg19&position=chr15:48628298-60825214&hgsid=443362677_4V80BwZqd7j9QbFDPX1nAl3yp6cs
15	60790182	61967645	35	-1.6244	1177464	http://genome.ucsc.edu/cgi-bin/hgTracks?db=hg19&position=chr15:60740182-62017645&hgsid=443362677_4V80BwZqd7j9QbFDPX1nAl3yp6cs
15	61981032	81359527	1194	-0.4381	19378496	http://genome.ucsc.edu/cgi-bin/hgTracks?db=hg19&position=chr15:61931032-81409527&hgsid=443362677_4V80BwZqd7j9QbFDPX1nAl3yp6cs
15	81379823	85145277	184	-1.0104	3765455	http://genome.ucsc.edu/cgi-bin/hgTracks?db=hg19&position=chr15:81329823-85195277&hgsid=443362677_4V80BwZqd7j9QbFDPX1nAl3yp6cs
15	85158277	86394409	98	-0.3868	1236133	http://genome.ucsc.edu/cgi-bin/hgTracks?db=hg19&position=chr15:85108277-86444409&hgsid=443362677_4V80BwZqd7j9QbFDPX1nAl3yp6cs
15	86418146	89481769	86	-1.2372	3063624	http://genome.ucsc.edu/cgi-bin/hgTracks?db=hg19&position=chr15:86368146-89531769&hgsid=443362677_4V80BwZqd7j9QbFDPX1nAl3yp6cs
15	89496885	91571514	220	-0.4193	2074630	http://genome.ucsc.edu/cgi-bin/hgTracks?db=hg19&position=chr15:89446885-91621514&hgsid=443362677_4V80BwZqd7j9QbFDPX1nAl3yp6cs
15	91639221	97970051	261	-1.0641	6330831	http://genome.ucsc.edu/cgi-bin/hgTracks?db=hg19&position=chr15:91589221-98020051&hgsid=443362677_4V80BwZqd7j9QbFDPX1nAl3yp6cs
15	97983048	102471473	208	-0.5565	4488426	http://genome.ucsc.edu/cgi-bin/hgTracks?db=hg19&position=chr15:97933048-102521473&hgsid=443362677_4V80BwZqd7j9QbFDPX1nAl3yp6cs
16	72304	7013792	710	-0.436	6941489	http://genome.ucsc.edu/cgi-bin/hgTracks?db=hg19&position=chr16:22304-7063792&hgsid=443362677_4V80BwZqd7j9QbFDPX1nAl3yp6cs
16	7015430	8172662	55	-1.2282	1157233	http://genome.ucsc.edu/cgi-bin/hgTracks?db=hg19&position=chr16:6965430-8222662&hgsid=443362677_4V80BwZqd7j9QbFDPX1nAl3yp6cs
16	8175592	9950406	114	-0.499	1774815	http://genome.ucsc.edu/cgi-bin/hgTracks?db=hg19&position=chr16:8125592-10000406&hgsid=443362677_4V80BwZqd7j9QbFDPX1nAl3yp6cs
16	9962216	10317996	17	-1.7469	355781	http://genome.ucsc.edu/cgi-bin/hgTracks?db=hg19&position=chr16:9912216-10367996&hgsid=443362677_4V80BwZqd7j9QbFDPX1nAl3yp6cs
16	10329351	19837792	719	-0.4855	9508442	http://genome.ucsc.edu/cgi-bin/hgTracks?db=hg19&position=chr16:10279351-19887792&hgsid=443362677_4V80BwZqd7j9QbFDPX1nAl3yp6cs
16	19846999	20716619	40	-1.343	869621	http://genome.ucsc.edu/cgi-bin/hgTracks?db=hg19&position=chr16:19796999-20766619&hgsid=443362677_4V80BwZqd7j9QbFDPX1nAl3yp6cs
16	20763436	34857691	936	-0.4869	14094256	http://genome.ucsc.edu/cgi-bin/hgTracks?db=hg19&position=chr16:20713436-34907691&hgsid=443362677_4V80BwZqd7j9QbFDPX1nAl3yp6cs
16	46472193	59292626	555	-0.4958	12820434	http://genome.ucsc.edu/cgi-bin/hgTracks?db=hg19&position=chr16:46422193-59342626&hgsid=443362677_4V80BwZqd7j9QbFDPX1nAl3yp6cs
16	59303177	65432043	192	-1.1106	6128867	http://genome.ucsc.edu/cgi-bin/hgTracks?db=hg19&position=chr16:59253177-65482043&hgsid=443362677_4V80BwZqd7j9QbFDPX1nAl3yp6cs
16	65436155	90215975	1788	-0.429	24779821	http://genome.ucsc.edu/cgi-bin/hgTracks?db=hg19&position=chr16:65386155-90265975&hgsid=443362677_4V80BwZqd7j9QbFDPX1nAl3yp6cs
17	8759	9630382	1323	-0.2036	9621624	http://genome.ucsc.edu/cgi-bin/hgTracks?db=hg19&position=chr17:-41241-9680382&hgsid=443362677_4V80BwZqd7j9QbFDPX1nAl3yp6cs
17	9637322	9965726	30	-0.8668	328405	http://genome.ucsc.edu/cgi-bin/hgTracks?db=hg19&position=chr17:9587322-10015726&hgsid=443362677_4V80BwZqd7j9QbFDPX1nAl3yp6cs
17	9969590	19871120	836	-0.1195	9901531	http://genome.ucsc.edu/cgi-bin/hgTracks?db=hg19&position=chr17:9919590-19921120&hgsid=443362677_4V80BwZqd7j9QbFDPX1nAl3yp6cs
17	19871438	21541807	120	-0.7226	1670370	http://genome.ucsc.edu/cgi-bin/hgTracks?db=hg19&position=chr17:19821438-21591807&hgsid=443362677_4V80BwZqd7j9QbFDPX1nAl3yp6cs
17	21703053	21932497	19	-0.0218	229445	http://genome.ucsc.edu/cgi-bin/hgTracks?db=hg19&position=chr17:21653053-21982497&hgsid=443362677_4V80BwZqd7j9QbFDPX1nAl3yp6cs
17	25344898	31332060	567	-0.4345	5987163	http://genome.ucsc.edu/cgi-bin/hgTracks?db=hg19&position=chr17:25294898-31382060&hgsid=443362677_4V80BwZqd7j9QbFDPX1nAl3yp6cs
17	31397448	33909524	71	-1.1956	2512077	http://genome.ucsc.edu/cgi-bin/hgTracks?db=hg19&position=chr17:31347448-33959524&hgsid=443362677_4V80BwZqd7j9QbFDPX1nAl3yp6cs
17	33928441	50555064	1680	-0.5173	16626624	http://genome.ucsc.edu/cgi-bin/hgTracks?db=hg19&position=chr17:33878441-50605064&hgsid=443362677_4V80BwZqd7j9QbFDPX1nAl3yp6cs
17	50555617	52933881	59	-1.2958	2378265	http://genome.ucsc.edu/cgi-bin/hgTracks?db=hg19&position=chr17:50505617-52983881&hgsid=443362677_4V80BwZqd7j9QbFDPX1nAl3yp6cs
17	53003189	56042576	143	-0.5759	3039388	http://genome.ucsc.edu/cgi-bin/hgTracks?db=hg19&position=chr17:52953189-56092576&hgsid=443362677_4V80BwZqd7j9QbFDPX1nAl3yp6cs
17	56047629	56712467	52	-1.1709	664839	http://genome.ucsc.edu/cgi-bin/hgTracks?db=hg19&position=chr17:55997629-56762467&hgsid=443362677_4V80BwZqd7j9QbFDPX1nAl3yp6cs
17	56715640	71971581	1184	-0.4613	15255942	http://genome.ucsc.edu/cgi-bin/hgTracks?db=hg19&position=chr17:56665640-72021581&hgsid=443362677_4V80BwZqd7j9QbFDPX1nAl3yp6cs
17	72020163	72704978	43	-1.2056	684816	http://genome.ucsc.edu/cgi-bin/hgTracks?db=hg19&position=chr17:71970163-72754978&hgsid=443362677_4V80BwZqd7j9QbFDPX1nAl3yp6cs
17	72706210	81118278	857	-0.4929	8412069	http://genome.ucsc.edu/cgi-bin/hgTracks?db=hg19&position=chr17:72656210-81168278&hgsid=443362677_4V80BwZqd7j9QbFDPX1nAl3yp6cs
18	31915	7003342	345	-0.2402	6971428	http://genome.ucsc.edu/cgi-bin/hgTracks?db=hg19&position=chr18:-18085-7053342&hgsid=443362677_4V80BwZqd7j9QbFDPX1nAl3yp6cs
18	7012597	8482427	86	-0.774	1469831	http://genome.ucsc.edu/cgi-bin/hgTracks?db=hg19&position=chr18:6962597-8532427&hgsid=443362677_4V80BwZqd7j9QbFDPX1nAl3yp6cs
18	8492100	15371135	393	-0.2964	6879036	http://genome.ucsc.edu/cgi-bin/hgTracks?db=hg19&position=chr18:8442100-15421135&hgsid=443362677_4V80BwZqd7j9QbFDPX1nAl3yp6cs
18	18553834	23941633	380	-0.2418	5387800	http://genome.ucsc.edu/cgi-bin/hgTracks?db=hg19&position=chr18:18503834-23991633&hgsid=443362677_4V80BwZqd7j9QbFDPX1nAl3yp6cs
18	24001277	28174898	115	-0.9171	4173622	http://genome.ucsc.edu/cgi-bin/hgTracks?db=hg19&position=chr18:23951277-28224898&hgsid=443362677_4V80BwZqd7j9QbFDPX1nAl3yp6cs
18	28358513	40712856	359	-0.3074	12354344	http://genome.ucsc.edu/cgi-bin/hgTracks?db=hg19&position=chr18:28308513-40762856&hgsid=443362677_4V80BwZqd7j9QbFDPX1nAl3yp6cs
18	40726135	42213584	25	-1.3326	1487450	http://genome.ucsc.edu/cgi-bin/hgTracks?db=hg19&position=chr18:40676135-42263584&hgsid=443362677_4V80BwZqd7j9QbFDPX1nAl3yp6cs
18	42229801	61954533	736	-0.3194	19724733	http://genome.ucsc.edu/cgi-bin/hgTracks?db=hg19&position=chr18:42179801-62004533&hgsid=443362677_4V80BwZqd7j9QbFDPX1nAl3yp6cs
18	61963559	71390349	317	-0.7308	9426791	http://genome.ucsc.edu/cgi-bin/hgTracks?db=hg19&position=chr18:61913559-71440349&hgsid=443362677_4V80BwZqd7j9QbFDPX1nAl3yp6cs
18	71480688	77977184	223	-0.3748	6496497	http://genome.ucsc.edu/cgi-bin/hgTracks?db=hg19&position=chr18:71430688-78027184&hgsid=443362677_4V80BwZqd7j9QbFDPX1nAl3yp6cs
19	183513	8629749	1358	-0.4455	8446237	http://genome.ucsc.edu/cgi-bin/hgTracks?db=hg19&position=chr19:133513-8679749&hgsid=443362677_4V80BwZqd7j9QbFDPX1nAl3yp6cs
19	8631144	9662215	118	-0.8457	1031072	http://genome.ucsc.edu/cgi-bin/hgTracks?db=hg19&position=chr19:8581144-9712215&hgsid=443362677_4V80BwZqd7j9QbFDPX1nAl3yp6cs
19	9669064	14654343	782	-0.3369	4985280	http://genome.ucsc.edu/cgi-bin/hgTracks?db=hg19&position=chr19:9619064-14704343&hgsid=443362677_4V80BwZqd7j9QbFDPX1nAl3yp6cs
19	14657323	14958415	39	-1.1239	301093	http://genome.ucsc.edu/cgi-bin/hgTracks?db=hg19&position=chr19:14607323-15008415&hgsid=443362677_4V80BwZqd7j9QbFDPX1nAl3yp6cs
19	14966129	20151871	698	-0.3783	5185743	http://genome.ucsc.edu/cgi-bin/hgTracks?db=hg19&position=chr19:14916129-20201871&hgsid=443362677_4V80BwZqd7j9QbFDPX1nAl3yp6cs
19	20157929	20990479	64	-1.022	832551	http://genome.ucsc.edu/cgi-bin/hgTracks?db=hg19&position=chr19:20107929-21040479&hgsid=443362677_4V80BwZqd7j9QbFDPX1nAl3yp6cs
19	20999105	21715593	73	-0.3627	716489	http://genome.ucsc.edu/cgi-bin/hgTracks?db=hg19&position=chr19:20949105-21765593&hgsid=443362677_4V80BwZqd7j9QbFDPX1nAl3yp6cs
19	21716548	23389982	146	-1.0705	1673435	http://genome.ucsc.edu/cgi-bin/hgTracks?db=hg19&position=chr19:21666548-23439982&hgsid=443362677_4V80BwZqd7j9QbFDPX1nAl3yp6cs
19	23391413	24494920	87	-0.2928	1103508	http://genome.ucsc.edu/cgi-bin/hgTracks?db=hg19&position=chr19:23341413-24544920&hgsid=443362677_4V80BwZqd7j9QbFDPX1nAl3yp6cs
19	28126214	32865480	146	-0.8526	4739267	http://genome.ucsc.edu/cgi-bin/hgTracks?db=hg19&position=chr19:28076214-32915480&hgsid=443362677_4V80BwZqd7j9QbFDPX1nAl3yp6cs
19	32881911	58421838	2889	-0.4606	25539928	http://genome.ucsc.edu/cgi-bin/hgTracks?db=hg19&position=chr19:32831911-58471838&hgsid=443362677_4V80BwZqd7j9QbFDPX1nAl3yp6cs
19	58425778	58553718	28	-1.5007	127941	http://genome.ucsc.edu/cgi-bin/hgTracks?db=hg19&position=chr19:58375778-58603718&hgsid=443362677_4V80BwZqd7j9QbFDPX1nAl3yp6cs
19	58573843	59093829	86	-0.2868	519987	http://genome.ucsc.edu/cgi-bin/hgTracks?db=hg19&position=chr19:58523843-59143829&hgsid=443362677_4V80BwZqd7j9QbFDPX1nAl3yp6cs
20	82019	15199616	690	-0.6923	15117598	http://genome.ucsc.edu/cgi-bin/hgTracks?db=hg19&position=chr20:32019-15249616&hgsid=443362677_4V80BwZqd7j9QbFDPX1nAl3yp6cs
20	15256970	17527271	62	-1.5373	2270302	http://genome.ucsc.edu/cgi-bin/hgTracks?db=hg19&position=chr20:15206970-17577271&hgsid=443362677_4V80BwZqd7j9QbFDPX1nAl3yp6cs
20	17536222	20679126	129	-0.4243	3142905	http://genome.ucsc.edu/cgi-bin/hgTracks?db=hg19&position=chr20:17486222-20729126&hgsid=443362677_4V80BwZqd7j9QbFDPX1nAl3yp6cs
20	20739396	26248131	154	-1.1155	5508736	http://genome.ucsc.edu/cgi-bin/hgTracks?db=hg19&position=chr20:20689396-26298131&hgsid=443362677_4V80BwZqd7j9QbFDPX1nAl3yp6cs
20	29442630	50828464	1591	-0.8881	21385835	http://genome.ucsc.edu/cgi-bin/hgTracks?db=hg19&position=chr20:29392630-50878464&hgsid=443362677_4V80BwZqd7j9QbFDPX1nAl3yp6cs
20	50836405	51105278	7	-3.3434	268874	http://genome.ucsc.edu/cgi-bin/hgTracks?db=hg19&position=chr20:50786405-51155278&hgsid=443362677_4V80BwZqd7j9QbFDPX1nAl3yp6cs
20	51216236	51538541	9	-0.9728	322306	http://genome.ucsc.edu/cgi-bin/hgTracks?db=hg19&position=chr20:51166236-51588541&hgsid=443362677_4V80BwZqd7j9QbFDPX1nAl3yp6cs
20	51602865	51922441	9	-2.3444	319577	http://genome.ucsc.edu/cgi-bin/hgTracks?db=hg19&position=chr20:51552865-51972441&hgsid=443362677_4V80BwZqd7j9QbFDPX1nAl3yp6cs
20	51931253	52926256	96	-0.8728	995004	http://genome.ucsc.edu/cgi-bin/hgTracks?db=hg19&position=chr20:51881253-52976256&hgsid=443362677_4V80BwZqd7j9QbFDPX1nAl3yp6cs
20	52946930	53185395	11	-2.8107	238466	http://genome.ucsc.edu/cgi-bin/hgTracks?db=hg19&position=chr20:52896930-53235395&hgsid=443362677_4V80BwZqd7j9QbFDPX1nAl3yp6cs
20	53209172	58530850	234	-1.0391	5321679	http://genome.ucsc.edu/cgi-bin/hgTracks?db=hg19&position=chr20:53159172-58580850&hgsid=443362677_4V80BwZqd7j9QbFDPX1nAl3yp6cs
20	58564507	60386820	36	-2.0954	1822314	http://genome.ucsc.edu/cgi-bin/hgTracks?db=hg19&position=chr20:58514507-60436820&hgsid=443362677_4V80BwZqd7j9QbFDPX1nAl3yp6cs
20	60535664	62934100	138	-1.014	2398437	http://genome.ucsc.edu/cgi-bin/hgTracks?db=hg19&position=chr20:60485664-62984100&hgsid=443362677_4V80BwZqd7j9QbFDPX1nAl3yp6cs
21	9418291	11154720	63	-0.9332	1736430	http://genome.ucsc.edu/cgi-bin/hgTracks?db=hg19&position=chr21:9368291-11204720&hgsid=443362677_4V80BwZqd7j9QbFDPX1nAl3yp6cs
21	14383121	18633624	142	-0.8578	4250504	http://genome.ucsc.edu/cgi-bin/hgTracks?db=hg19&position=chr21:14333121-18683624&hgsid=443362677_4V80BwZqd7j9QbFDPX1nAl3yp6cs
21	18709087	19117892	36	-0.2097	408806	http://genome.ucsc.edu/cgi-bin/hgTracks?db=hg19&position=chr21:18659087-19167892&hgsid=443362677_4V80BwZqd7j9QbFDPX1nAl3yp6cs
21	19138634	26865804	289	-1.0562	7727171	http://genome.ucsc.edu/cgi-bin/hgTracks?db=hg19&position=chr21:19088634-26915804&hgsid=443362677_4V80BwZqd7j9QbFDPX1nAl3yp6cs
21	26949494	27337006	24	-0.0551	387513	http://genome.ucsc.edu/cgi-bin/hgTracks?db=hg19&position=chr21:26899494-27387006&hgsid=443362677_4V80BwZqd7j9QbFDPX1nAl3yp6cs
21	27360939	30105525	105	-0.7687	2744587	http://genome.ucsc.edu/cgi-bin/hgTracks?db=hg19&position=chr21:27310939-30155525&hgsid=443362677_4V80BwZqd7j9QbFDPX1nAl3yp6cs
21	30123477	31028606	37	-0.1867	905130	http://genome.ucsc.edu/cgi-bin/hgTracks?db=hg19&position=chr21:30073477-31078606&hgsid=443362677_4V80BwZqd7j9QbFDPX1nAl3yp6cs
21	31063554	33608619	153	-1.0158	2545066	http://genome.ucsc.edu/cgi-bin/hgTracks?db=hg19&position=chr21:31013554-33658619&hgsid=443362677_4V80BwZqd7j9QbFDPX1nAl3yp6cs
21	33614283	40874023	423	-0.3784	7259741	http://genome.ucsc.edu/cgi-bin/hgTracks?db=hg19&position=chr21:33564283-40924023&hgsid=443362677_4V80BwZqd7j9QbFDPX1nAl3yp6cs
21	40884643	42359365	64	-1.0591	1474723	http://genome.ucsc.edu/cgi-bin/hgTracks?db=hg19&position=chr21:40834643-42409365&hgsid=443362677_4V80BwZqd7j9QbFDPX1nAl3yp6cs
21	42360905	48117364	293	-0.4809	5756460	http://genome.ucsc.edu/cgi-bin/hgTracks?db=hg19&position=chr21:42310905-48167364&hgsid=443362677_4V80BwZqd7j9QbFDPX1nAl3yp6cs
22	16080687	51244237	2918	-0.3653	35163551	http://genome.ucsc.edu/cgi-bin/hgTracks?db=hg19&position=chr22:16030687-51294237&hgsid=443362677_4V80BwZqd7j9QbFDPX1nAl3yp6cs
23	219332	25827608	1085	-0.4324	25608277	http://genome.ucsc.edu/cgi-bin/hgTracks?db=hg19&position=chr23:169332-25877608&hgsid=443362677_4V80BwZqd7j9QbFDPX1nAl3yp6cs
23	25832714	29906433	151	-0.9369	4073720	http://genome.ucsc.edu/cgi-bin/hgTracks?db=hg19&position=chr23:25782714-29956433&hgsid=443362677_4V80BwZqd7j9QbFDPX1nAl3yp6cs
23	29924376	32188563	123	-0.5188	2264188	http://genome.ucsc.edu/cgi-bin/hgTracks?db=hg19&position=chr23:29874376-32238563&hgsid=443362677_4V80BwZqd7j9QbFDPX1nAl3yp6cs
23	32215027	34959084	97	-1.0547	2744058	http://genome.ucsc.edu/cgi-bin/hgTracks?db=hg19&position=chr23:32165027-35009084&hgsid=443362677_4V80BwZqd7j9QbFDPX1nAl3yp6cs
23	34959683	58421316	1180	-0.3846	23461634	http://genome.ucsc.edu/cgi-bin/hgTracks?db=hg19&position=chr23:34909683-58471316&hgsid=443362677_4V80BwZqd7j9QbFDPX1nAl3yp6cs
23	62141982	85597734	656	-0.428	23455753	http://genome.ucsc.edu/cgi-bin/hgTracks?db=hg19&position=chr23:62091982-85647734&hgsid=443362677_4V80BwZqd7j9QbFDPX1nAl3yp6cs
23	85763487	94829324	179	-0.8429	9065838	http://genome.ucsc.edu/cgi-bin/hgTracks?db=hg19&position=chr23:85713487-94879324&hgsid=443362677_4V80BwZqd7j9QbFDPX1nAl3yp6cs
23	94849139	136466430	1539	-0.4732	41617292	http://genome.ucsc.edu/cgi-bin/hgTracks?db=hg19&position=chr23:94799139-136516430&hgsid=443362677_4V80BwZqd7j9QbFDPX1nAl3yp6cs
23	136471877	146780262	346	-0.8376	10308386	http://genome.ucsc.edu/cgi-bin/hgTracks?db=hg19&position=chr23:136421877-146830262&hgsid=443362677_4V80BwZqd7j9QbFDPX1nAl3yp6cs
23	146794254	151646496	118	-0.3748	4852243	http://genome.ucsc.edu/cgi-bin/hgTracks?db=hg19&position=chr23:146744254-151696496&hgsid=443362677_4V80BwZqd7j9QbFDPX1nAl3yp6cs
23	151816920	153165953	37	-0.9914	1349034	http://genome.ucsc.edu/cgi-bin/hgTracks?db=hg19&position=chr23:151766920-153215953&hgsid=443362677_4V80BwZqd7j9QbFDPX1nAl3yp6cs
23	153180075	154819035	89	-0.2707	1638961	http://genome.ucsc.edu/cgi-bin/hgTracks?db=hg19&position=chr23:153130075-154869035&hgsid=443362677_4V80BwZqd7j9QbFDPX1nAl3yp6cs
24	148518	3384622	33	-0.0606	3236105	http://genome.ucsc.edu/cgi-bin/hgTracks?db=hg19&position=chr24:98518-3434622&hgsid=443362677_4V80BwZqd7j9QbFDPX1nAl3yp6cs
24	3436255	5671502	47	-0.6933	2235248	http://genome.ucsc.edu/cgi-bin/hgTracks?db=hg19&position=chr24:3386255-5721502&hgsid=443362677_4V80BwZqd7j9QbFDPX1nAl3yp6cs
24	5787665	10032472	47	-0.0961	4244808	http://genome.ucsc.edu/cgi-bin/hgTracks?db=hg19&position=chr24:5737665-10082472&hgsid=443362677_4V80BwZqd7j9QbFDPX1nAl3yp6cs
24	13132760	59327398	163	-0.3339	46194639	http://genome.ucsc.edu/cgi-bin/hgTracks?db=hg19&position=chr24:13082760-59377398&hgsid=443362677_4V80BwZqd7j9QbFDPX1nAl3yp6cs

## Sheet: ALL TUMORs
chrom	loc.start	loc.end	num.mark	seg.mean	UCSC GB view
1	532833	4065980	208	-0.2641	http://genome.ucsc.edu/cgi-bin/hgTracks?db=hg19&position=chr1:482833-4115980&hgsid=443362677_4V80BwZqd7j9QbFDPX1nAl3yp6cs
1	4114512	5844486	48	-0.8386	http://genome.ucsc.edu/cgi-bin/hgTracks?db=hg19&position=chr1:4064512-5894486&hgsid=443362677_4V80BwZqd7j9QbFDPX1nAl3yp6cs
1	5872263	14453525	834	-0.2683	http://genome.ucsc.edu/cgi-bin/hgTracks?db=hg19&position=chr1:5822263-14503525&hgsid=443362677_4V80BwZqd7j9QbFDPX1nAl3yp6cs
1	14501691	14968820	29	-0.9611	http://genome.ucsc.edu/cgi-bin/hgTracks?db=hg19&position=chr1:14451691-15018820&hgsid=443362677_4V80BwZqd7j9QbFDPX1nAl3yp6cs
1	15026891	36992413	1934	-0.2335	http://genome.ucsc.edu/cgi-bin/hgTracks?db=hg19&position=chr1:14976891-37042413&hgsid=443362677_4V80BwZqd7j9QbFDPX1nAl3yp6cs
1	37006720	37468372	18	-1.0684	http://genome.ucsc.edu/cgi-bin/hgTracks?db=hg19&position=chr1:36956720-37518372&hgsid=443362677_4V80BwZqd7j9QbFDPX1nAl3yp6cs
1	37476435	38504073	64	-0.1401	http://genome.ucsc.edu/cgi-bin/hgTracks?db=hg19&position=chr1:37426435-38554073&hgsid=443362677_4V80BwZqd7j9QbFDPX1nAl3yp6cs
1	38545683	39272603	26	-0.9812	http://genome.ucsc.edu/cgi-bin/hgTracks?db=hg19&position=chr1:38495683-39322603&hgsid=443362677_4V80BwZqd7j9QbFDPX1nAl3yp6cs
1	39294605	55693742	1174	-0.2415	http://genome.ucsc.edu/cgi-bin/hgTracks?db=hg19&position=chr1:39244605-55743742&hgsid=443362677_4V80BwZqd7j9QbFDPX1nAl3yp6cs
1	55703766	58798674	75	-0.8319	http://genome.ucsc.edu/cgi-bin/hgTracks?db=hg19&position=chr1:55653766-58848674&hgsid=443362677_4V80BwZqd7j9QbFDPX1nAl3yp6cs
1	58862661	62654580	134	-0.1505	http://genome.ucsc.edu/cgi-bin/hgTracks?db=hg19&position=chr1:58812661-62704580&hgsid=443362677_4V80BwZqd7j9QbFDPX1nAl3yp6cs
1	62655429	62882752	24	-0.8065	http://genome.ucsc.edu/cgi-bin/hgTracks?db=hg19&position=chr1:62605429-62932752&hgsid=443362677_4V80BwZqd7j9QbFDPX1nAl3yp6cs
1	62893684	63312772	36	0.0723	http://genome.ucsc.edu/cgi-bin/hgTracks?db=hg19&position=chr1:62843684-63362772&hgsid=443362677_4V80BwZqd7j9QbFDPX1nAl3yp6cs
1	63336469	63761688	24	-1.0451	http://genome.ucsc.edu/cgi-bin/hgTracks?db=hg19&position=chr1:63286469-63811688&hgsid=443362677_4V80BwZqd7j9QbFDPX1nAl3yp6cs
1	63766223	68705111	211	-0.2412	http://genome.ucsc.edu/cgi-bin/hgTracks?db=hg19&position=chr1:63716223-68755111&hgsid=443362677_4V80BwZqd7j9QbFDPX1nAl3yp6cs
1	68707898	78016786	240	-0.7506	http://genome.ucsc.edu/cgi-bin/hgTracks?db=hg19&position=chr1:68657898-78066786&hgsid=443362677_4V80BwZqd7j9QbFDPX1nAl3yp6cs
1	78020383	78719256	55	-0.1529	http://genome.ucsc.edu/cgi-bin/hgTracks?db=hg19&position=chr1:77970383-78769256&hgsid=443362677_4V80BwZqd7j9QbFDPX1nAl3yp6cs
1	78766215	83907777	119	-0.7233	http://genome.ucsc.edu/cgi-bin/hgTracks?db=hg19&position=chr1:78716215-83957777&hgsid=443362677_4V80BwZqd7j9QbFDPX1nAl3yp6cs
1	83909123	84528830	17	-1.4004	http://genome.ucsc.edu/cgi-bin/hgTracks?db=hg19&position=chr1:83859123-84578830&hgsid=443362677_4V80BwZqd7j9QbFDPX1nAl3yp6cs
1	84714489	97448408	498	-0.3344	http://genome.ucsc.edu/cgi-bin/hgTracks?db=hg19&position=chr1:84664489-97498408&hgsid=443362677_4V80BwZqd7j9QbFDPX1nAl3yp6cs
1	97599479	108721360	293	-0.7252	http://genome.ucsc.edu/cgi-bin/hgTracks?db=hg19&position=chr1:97549479-108771360&hgsid=443362677_4V80BwZqd7j9QbFDPX1nAl3yp6cs
1	108849480	121182415	522	-0.1918	http://genome.ucsc.edu/cgi-bin/hgTracks?db=hg19&position=chr1:108799480-121232415&hgsid=443362677_4V80BwZqd7j9QbFDPX1nAl3yp6cs
1	142582362	154598404	676	-0.3448	http://genome.ucsc.edu/cgi-bin/hgTracks?db=hg19&position=chr1:142532362-154648404&hgsid=443362677_4V80BwZqd7j9QbFDPX1nAl3yp6cs
1	154603413	154798448	14	-1.2266	http://genome.ucsc.edu/cgi-bin/hgTracks?db=hg19&position=chr1:154553413-154848448&hgsid=443362677_4V80BwZqd7j9QbFDPX1nAl3yp6cs
1	154823547	175348239	1001	-0.4124	http://genome.ucsc.edu/cgi-bin/hgTracks?db=hg19&position=chr1:154773547-175398239&hgsid=443362677_4V80BwZqd7j9QbFDPX1nAl3yp6cs
1	175349631	175859609	12	-1.3996	http://genome.ucsc.edu/cgi-bin/hgTracks?db=hg19&position=chr1:175299631-175909609&hgsid=443362677_4V80BwZqd7j9QbFDPX1nAl3yp6cs
1	175876196	176173988	17	0.027	http://genome.ucsc.edu/cgi-bin/hgTracks?db=hg19&position=chr1:175826196-176223988&hgsid=443362677_4V80BwZqd7j9QbFDPX1nAl3yp6cs
1	176190044	177165678	26	-1.4814	http://genome.ucsc.edu/cgi-bin/hgTracks?db=hg19&position=chr1:176140044-177215678&hgsid=443362677_4V80BwZqd7j9QbFDPX1nAl3yp6cs
1	177210200	214928645	1531	-0.5101	http://genome.ucsc.edu/cgi-bin/hgTracks?db=hg19&position=chr1:177160200-214978645&hgsid=443362677_4V80BwZqd7j9QbFDPX1nAl3yp6cs
1	214953959	215377305	6	-1.8193	http://genome.ucsc.edu/cgi-bin/hgTracks?db=hg19&position=chr1:214903959-215427305&hgsid=443362677_4V80BwZqd7j9QbFDPX1nAl3yp6cs
1	215386878	216384247	23	-0.3834	http://genome.ucsc.edu/cgi-bin/hgTracks?db=hg19&position=chr1:215336878-216434247&hgsid=443362677_4V80BwZqd7j9QbFDPX1nAl3yp6cs
1	216543189	217588881	30	-1.3657	http://genome.ucsc.edu/cgi-bin/hgTracks?db=hg19&position=chr1:216493189-217638881&hgsid=443362677_4V80BwZqd7j9QbFDPX1nAl3yp6cs
1	217631496	233922135	794	-0.4256	http://genome.ucsc.edu/cgi-bin/hgTracks?db=hg19&position=chr1:217581496-233972135&hgsid=443362677_4V80BwZqd7j9QbFDPX1nAl3yp6cs
1	233969799	234525339	23	-1.3151	http://genome.ucsc.edu/cgi-bin/hgTracks?db=hg19&position=chr1:233919799-234575339&hgsid=443362677_4V80BwZqd7j9QbFDPX1nAl3yp6cs
1	234528549	236768607	203	-0.3549	http://genome.ucsc.edu/cgi-bin/hgTracks?db=hg19&position=chr1:234478549-236818607&hgsid=443362677_4V80BwZqd7j9QbFDPX1nAl3yp6cs
1	236777020	239334825	115	-0.9331	http://genome.ucsc.edu/cgi-bin/hgTracks?db=hg19&position=chr1:236727020-239384825&hgsid=443362677_4V80BwZqd7j9QbFDPX1nAl3yp6cs
1	239340935	240111914	46	0	http://genome.ucsc.edu/cgi-bin/hgTracks?db=hg19&position=chr1:239290935-240161914&hgsid=443362677_4V80BwZqd7j9QbFDPX1nAl3yp6cs
1	240168672	240856176	55	-1.236	http://genome.ucsc.edu/cgi-bin/hgTracks?db=hg19&position=chr1:240118672-240906176&hgsid=443362677_4V80BwZqd7j9QbFDPX1nAl3yp6cs
1	240864598	242184252	90	-0.5111	http://genome.ucsc.edu/cgi-bin/hgTracks?db=hg19&position=chr1:240814598-242234252&hgsid=443362677_4V80BwZqd7j9QbFDPX1nAl3yp6cs
1	242186858	242986189	53	-1.0627	http://genome.ucsc.edu/cgi-bin/hgTracks?db=hg19&position=chr1:242136858-243036189&hgsid=443362677_4V80BwZqd7j9QbFDPX1nAl3yp6cs
1	243022875	243642184	45	-0.3493	http://genome.ucsc.edu/cgi-bin/hgTracks?db=hg19&position=chr1:242972875-243692184&hgsid=443362677_4V80BwZqd7j9QbFDPX1nAl3yp6cs
1	243672060	244195618	24	-1.3956	http://genome.ucsc.edu/cgi-bin/hgTracks?db=hg19&position=chr1:243622060-244245618&hgsid=443362677_4V80BwZqd7j9QbFDPX1nAl3yp6cs
1	244242867	247349849	254	-0.319	http://genome.ucsc.edu/cgi-bin/hgTracks?db=hg19&position=chr1:244192867-247399849&hgsid=443362677_4V80BwZqd7j9QbFDPX1nAl3yp6cs
1	247389814	249237754	63	-0.9092	http://genome.ucsc.edu/cgi-bin/hgTracks?db=hg19&position=chr1:247339814-249287754&hgsid=443362677_4V80BwZqd7j9QbFDPX1nAl3yp6cs
2	38125	3766768	75	-0.5669	http://genome.ucsc.edu/cgi-bin/hgTracks?db=hg19&position=chr2:-11875-3816768&hgsid=443362677_4V80BwZqd7j9QbFDPX1nAl3yp6cs
2	3884376	6297383	67	-1.1714	http://genome.ucsc.edu/cgi-bin/hgTracks?db=hg19&position=chr2:3834376-6347383&hgsid=443362677_4V80BwZqd7j9QbFDPX1nAl3yp6cs
2	6340038	21023504	531	-0.4344	http://genome.ucsc.edu/cgi-bin/hgTracks?db=hg19&position=chr2:6290038-21073504&hgsid=443362677_4V80BwZqd7j9QbFDPX1nAl3yp6cs
2	21033721	23026190	55	-1.0543	http://genome.ucsc.edu/cgi-bin/hgTracks?db=hg19&position=chr2:20983721-23076190&hgsid=443362677_4V80BwZqd7j9QbFDPX1nAl3yp6cs
2	23061989	29418525	507	-0.299	http://genome.ucsc.edu/cgi-bin/hgTracks?db=hg19&position=chr2:23011989-29468525&hgsid=443362677_4V80BwZqd7j9QbFDPX1nAl3yp6cs
2	29432332	30434433	33	-1.0897	http://genome.ucsc.edu/cgi-bin/hgTracks?db=hg19&position=chr2:29382332-30484433&hgsid=443362677_4V80BwZqd7j9QbFDPX1nAl3yp6cs
2	30437340	33825509	223	-0.3166	http://genome.ucsc.edu/cgi-bin/hgTracks?db=hg19&position=chr2:30387340-33875509&hgsid=443362677_4V80BwZqd7j9QbFDPX1nAl3yp6cs
2	33830999	36569535	101	-1.0788	http://genome.ucsc.edu/cgi-bin/hgTracks?db=hg19&position=chr2:33780999-36619535&hgsid=443362677_4V80BwZqd7j9QbFDPX1nAl3yp6cs
2	36794829	39834457	204	-0.2591	http://genome.ucsc.edu/cgi-bin/hgTracks?db=hg19&position=chr2:36744829-39884457&hgsid=443362677_4V80BwZqd7j9QbFDPX1nAl3yp6cs
2	39873882	42051799	40	-1.0321	http://genome.ucsc.edu/cgi-bin/hgTracks?db=hg19&position=chr2:39823882-42101799&hgsid=443362677_4V80BwZqd7j9QbFDPX1nAl3yp6cs
2	42079731	48780719	380	-0.2898	http://genome.ucsc.edu/cgi-bin/hgTracks?db=hg19&position=chr2:42029731-48830719&hgsid=443362677_4V80BwZqd7j9QbFDPX1nAl3yp6cs
2	48785286	53871754	127	-0.7505	http://genome.ucsc.edu/cgi-bin/hgTracks?db=hg19&position=chr2:48735286-53921754&hgsid=443362677_4V80BwZqd7j9QbFDPX1nAl3yp6cs
2	53971445	56030591	119	-0.2094	http://genome.ucsc.edu/cgi-bin/hgTracks?db=hg19&position=chr2:53921445-56080591&hgsid=443362677_4V80BwZqd7j9QbFDPX1nAl3yp6cs
2	56051504	59695431	87	-0.9856	http://genome.ucsc.edu/cgi-bin/hgTracks?db=hg19&position=chr2:56001504-59745431&hgsid=443362677_4V80BwZqd7j9QbFDPX1nAl3yp6cs
2	59758800	60656461	22	-0.0627	http://genome.ucsc.edu/cgi-bin/hgTracks?db=hg19&position=chr2:59708800-60706461&hgsid=443362677_4V80BwZqd7j9QbFDPX1nAl3yp6cs
2	60676576	60910791	12	-1.3051	http://genome.ucsc.edu/cgi-bin/hgTracks?db=hg19&position=chr2:60626576-60960791&hgsid=443362677_4V80BwZqd7j9QbFDPX1nAl3yp6cs
2	60915376	65903907	373	-0.2461	http://genome.ucsc.edu/cgi-bin/hgTracks?db=hg19&position=chr2:60865376-65953907&hgsid=443362677_4V80BwZqd7j9QbFDPX1nAl3yp6cs
2	65967794	66747537	22	-1.1086	http://genome.ucsc.edu/cgi-bin/hgTracks?db=hg19&position=chr2:65917794-66797537&hgsid=443362677_4V80BwZqd7j9QbFDPX1nAl3yp6cs
2	66766112	75864113	442	-0.3283	http://genome.ucsc.edu/cgi-bin/hgTracks?db=hg19&position=chr2:66716112-75914113&hgsid=443362677_4V80BwZqd7j9QbFDPX1nAl3yp6cs
2	75935730	84054713	233	-1.0614	http://genome.ucsc.edu/cgi-bin/hgTracks?db=hg19&position=chr2:75885730-84104713&hgsid=443362677_4V80BwZqd7j9QbFDPX1nAl3yp6cs
2	84072630	92242661	316	-0.434	http://genome.ucsc.edu/cgi-bin/hgTracks?db=hg19&position=chr2:84022630-92292661&hgsid=443362677_4V80BwZqd7j9QbFDPX1nAl3yp6cs
2	95338540	100123311	248	-0.2337	http://genome.ucsc.edu/cgi-bin/hgTracks?db=hg19&position=chr2:95288540-100173311&hgsid=443362677_4V80BwZqd7j9QbFDPX1nAl3yp6cs
2	100131436	101167292	48	-1.1744	http://genome.ucsc.edu/cgi-bin/hgTracks?db=hg19&position=chr2:100081436-101217292&hgsid=443362677_4V80BwZqd7j9QbFDPX1nAl3yp6cs
2	101170046	102829353	125	-0.2463	http://genome.ucsc.edu/cgi-bin/hgTracks?db=hg19&position=chr2:101120046-102879353&hgsid=443362677_4V80BwZqd7j9QbFDPX1nAl3yp6cs
2	102881216	102991162	7	-1.5389	http://genome.ucsc.edu/cgi-bin/hgTracks?db=hg19&position=chr2:102831216-103041162&hgsid=443362677_4V80BwZqd7j9QbFDPX1nAl3yp6cs
2	103026904	103438371	19	-0.063	http://genome.ucsc.edu/cgi-bin/hgTracks?db=hg19&position=chr2:102976904-103488371&hgsid=443362677_4V80BwZqd7j9QbFDPX1nAl3yp6cs
2	103482848	104324516	34	-1.1222	http://genome.ucsc.edu/cgi-bin/hgTracks?db=hg19&position=chr2:103432848-104374516&hgsid=443362677_4V80BwZqd7j9QbFDPX1nAl3yp6cs
2	104382852	107414906	114	-0.4346	http://genome.ucsc.edu/cgi-bin/hgTracks?db=hg19&position=chr2:104332852-107464906&hgsid=443362677_4V80BwZqd7j9QbFDPX1nAl3yp6cs
2	107489150	108398055	24	-0.9964	http://genome.ucsc.edu/cgi-bin/hgTracks?db=hg19&position=chr2:107439150-108448055&hgsid=443362677_4V80BwZqd7j9QbFDPX1nAl3yp6cs
2	108409602	111439107	117	-0.2215	http://genome.ucsc.edu/cgi-bin/hgTracks?db=hg19&position=chr2:108359602-111489107&hgsid=443362677_4V80BwZqd7j9QbFDPX1nAl3yp6cs
2	111513796	111734887	8	-1.4549	http://genome.ucsc.edu/cgi-bin/hgTracks?db=hg19&position=chr2:111463796-111784887&hgsid=443362677_4V80BwZqd7j9QbFDPX1nAl3yp6cs
2	111738859	129006147	692	-0.4799	http://genome.ucsc.edu/cgi-bin/hgTracks?db=hg19&position=chr2:111688859-129056147&hgsid=443362677_4V80BwZqd7j9QbFDPX1nAl3yp6cs
2	129022086	130624931	59	-1.1405	http://genome.ucsc.edu/cgi-bin/hgTracks?db=hg19&position=chr2:128972086-130674931&hgsid=443362677_4V80BwZqd7j9QbFDPX1nAl3yp6cs
2	130632170	145322332	538	-0.6045	http://genome.ucsc.edu/cgi-bin/hgTracks?db=hg19&position=chr2:130582170-145372332&hgsid=443362677_4V80BwZqd7j9QbFDPX1nAl3yp6cs
2	145347364	147753826	58	-1.4027	http://genome.ucsc.edu/cgi-bin/hgTracks?db=hg19&position=chr2:145297364-147803826&hgsid=443362677_4V80BwZqd7j9QbFDPX1nAl3yp6cs
2	147794497	153695166	204	-0.3682	http://genome.ucsc.edu/cgi-bin/hgTracks?db=hg19&position=chr2:147744497-153745166&hgsid=443362677_4V80BwZqd7j9QbFDPX1nAl3yp6cs
2	153714838	156501759	60	-1.1589	http://genome.ucsc.edu/cgi-bin/hgTracks?db=hg19&position=chr2:153664838-156551759&hgsid=443362677_4V80BwZqd7j9QbFDPX1nAl3yp6cs
2	156518192	181925942	937	-0.446	http://genome.ucsc.edu/cgi-bin/hgTracks?db=hg19&position=chr2:156468192-181975942&hgsid=443362677_4V80BwZqd7j9QbFDPX1nAl3yp6cs
2	181961123	182353378	10	-1.8242	http://genome.ucsc.edu/cgi-bin/hgTracks?db=hg19&position=chr2:181911123-182403378&hgsid=443362677_4V80BwZqd7j9QbFDPX1nAl3yp6cs
2	182466213	184965103	85	-0.5413	http://genome.ucsc.edu/cgi-bin/hgTracks?db=hg19&position=chr2:182416213-185015103&hgsid=443362677_4V80BwZqd7j9QbFDPX1nAl3yp6cs
2	184997318	186003694	17	-1.2307	http://genome.ucsc.edu/cgi-bin/hgTracks?db=hg19&position=chr2:184947318-186053694&hgsid=443362677_4V80BwZqd7j9QbFDPX1nAl3yp6cs
2	186081603	187735529	40	-0.3437	http://genome.ucsc.edu/cgi-bin/hgTracks?db=hg19&position=chr2:186031603-187785529&hgsid=443362677_4V80BwZqd7j9QbFDPX1nAl3yp6cs
2	187760581	190160265	80	-0.9965	http://genome.ucsc.edu/cgi-bin/hgTracks?db=hg19&position=chr2:187710581-190210265&hgsid=443362677_4V80BwZqd7j9QbFDPX1nAl3yp6cs
2	190202001	207135386	828	-0.2972	http://genome.ucsc.edu/cgi-bin/hgTracks?db=hg19&position=chr2:190152001-207185386&hgsid=443362677_4V80BwZqd7j9QbFDPX1nAl3yp6cs
2	207177231	208294693	27	-1.1578	http://genome.ucsc.edu/cgi-bin/hgTracks?db=hg19&position=chr2:207127231-208344693&hgsid=443362677_4V80BwZqd7j9QbFDPX1nAl3yp6cs
2	208305450	228712503	912	-0.5516	http://genome.ucsc.edu/cgi-bin/hgTracks?db=hg19&position=chr2:208255450-228762503&hgsid=443362677_4V80BwZqd7j9QbFDPX1nAl3yp6cs
2	228801572	229840917	30	-1.2263	http://genome.ucsc.edu/cgi-bin/hgTracks?db=hg19&position=chr2:228751572-229890917&hgsid=443362677_4V80BwZqd7j9QbFDPX1nAl3yp6cs
2	229937228	243062779	689	-0.2735	http://genome.ucsc.edu/cgi-bin/hgTracks?db=hg19&position=chr2:229887228-243112779&hgsid=443362677_4V80BwZqd7j9QbFDPX1nAl3yp6cs
3	81317	3153827	105	-0.9026	http://genome.ucsc.edu/cgi-bin/hgTracks?db=hg19&position=chr3:31317-3203827&hgsid=443362677_4V80BwZqd7j9QbFDPX1nAl3yp6cs
3	3163386	4629050	28	-0.1206	http://genome.ucsc.edu/cgi-bin/hgTracks?db=hg19&position=chr3:3113386-4679050&hgsid=443362677_4V80BwZqd7j9QbFDPX1nAl3yp6cs
3	4657153	4667333	4	-2.2304	http://genome.ucsc.edu/cgi-bin/hgTracks?db=hg19&position=chr3:4607153-4717333&hgsid=443362677_4V80BwZqd7j9QbFDPX1nAl3yp6cs
3	4674715	6298012	59	-0.4125	http://genome.ucsc.edu/cgi-bin/hgTracks?db=hg19&position=chr3:4624715-6348012&hgsid=443362677_4V80BwZqd7j9QbFDPX1nAl3yp6cs
3	6337139	8499437	69	-0.9054	http://genome.ucsc.edu/cgi-bin/hgTracks?db=hg19&position=chr3:6287139-8549437&hgsid=443362677_4V80BwZqd7j9QbFDPX1nAl3yp6cs
3	8505356	20253077	549	-0.2606	http://genome.ucsc.edu/cgi-bin/hgTracks?db=hg19&position=chr3:8455356-20303077&hgsid=443362677_4V80BwZqd7j9QbFDPX1nAl3yp6cs
3	20338892	23445239	56	-1.0241	http://genome.ucsc.edu/cgi-bin/hgTracks?db=hg19&position=chr3:20288892-23495239&hgsid=443362677_4V80BwZqd7j9QbFDPX1nAl3yp6cs
3	23482954	90281211	2862	-0.3878	http://genome.ucsc.edu/cgi-bin/hgTracks?db=hg19&position=chr3:23432954-90331211&hgsid=443362677_4V80BwZqd7j9QbFDPX1nAl3yp6cs
3	93530026	97495593	101	-0.754	http://genome.ucsc.edu/cgi-bin/hgTracks?db=hg19&position=chr3:93480026-97545593&hgsid=443362677_4V80BwZqd7j9QbFDPX1nAl3yp6cs
3	97676264	101972295	133	-0.3152	http://genome.ucsc.edu/cgi-bin/hgTracks?db=hg19&position=chr3:97626264-102022295&hgsid=443362677_4V80BwZqd7j9QbFDPX1nAl3yp6cs
3	101981567	105043548	66	-0.8118	http://genome.ucsc.edu/cgi-bin/hgTracks?db=hg19&position=chr3:101931567-105093548&hgsid=443362677_4V80BwZqd7j9QbFDPX1nAl3yp6cs
3	105061581	106273350	45	-0.2752	http://genome.ucsc.edu/cgi-bin/hgTracks?db=hg19&position=chr3:105011581-106323350&hgsid=443362677_4V80BwZqd7j9QbFDPX1nAl3yp6cs
3	106307520	106964057	27	-1.0949	http://genome.ucsc.edu/cgi-bin/hgTracks?db=hg19&position=chr3:106257520-107014057&hgsid=443362677_4V80BwZqd7j9QbFDPX1nAl3yp6cs
3	107000570	134271138	1002	-0.3564	http://genome.ucsc.edu/cgi-bin/hgTracks?db=hg19&position=chr3:106950570-134321138&hgsid=443362677_4V80BwZqd7j9QbFDPX1nAl3yp6cs
3	134300610	135773193	27	-1.0239	http://genome.ucsc.edu/cgi-bin/hgTracks?db=hg19&position=chr3:134250610-135823193&hgsid=443362677_4V80BwZqd7j9QbFDPX1nAl3yp6cs
3	135780686	136770715	90	-0.0329	http://genome.ucsc.edu/cgi-bin/hgTracks?db=hg19&position=chr3:135730686-136820715&hgsid=443362677_4V80BwZqd7j9QbFDPX1nAl3yp6cs
3	136839954	137846340	20	-1.0276	http://genome.ucsc.edu/cgi-bin/hgTracks?db=hg19&position=chr3:136789954-137896340&hgsid=443362677_4V80BwZqd7j9QbFDPX1nAl3yp6cs
3	137868566	156918284	761	-0.4412	http://genome.ucsc.edu/cgi-bin/hgTracks?db=hg19&position=chr3:137818566-156968284&hgsid=443362677_4V80BwZqd7j9QbFDPX1nAl3yp6cs
3	156931672	157716047	19	-1.2748	http://genome.ucsc.edu/cgi-bin/hgTracks?db=hg19&position=chr3:156881672-157766047&hgsid=443362677_4V80BwZqd7j9QbFDPX1nAl3yp6cs
3	157778460	167953548	263	-0.5655	http://genome.ucsc.edu/cgi-bin/hgTracks?db=hg19&position=chr3:157728460-168003548&hgsid=443362677_4V80BwZqd7j9QbFDPX1nAl3yp6cs
3	168008916	168570446	16	-0.9338	http://genome.ucsc.edu/cgi-bin/hgTracks?db=hg19&position=chr3:167958916-168620446&hgsid=443362677_4V80BwZqd7j9QbFDPX1nAl3yp6cs
3	168609292	172548250	223	-0.1327	http://genome.ucsc.edu/cgi-bin/hgTracks?db=hg19&position=chr3:168559292-172598250&hgsid=443362677_4V80BwZqd7j9QbFDPX1nAl3yp6cs
3	172550319	174018937	50	-0.8875	http://genome.ucsc.edu/cgi-bin/hgTracks?db=hg19&position=chr3:172500319-174068937&hgsid=443362677_4V80BwZqd7j9QbFDPX1nAl3yp6cs
3	174185307	179505482	267	-0.35	http://genome.ucsc.edu/cgi-bin/hgTracks?db=hg19&position=chr3:174135307-179555482&hgsid=443362677_4V80BwZqd7j9QbFDPX1nAl3yp6cs
3	179526786	181555410	84	-0.9162	http://genome.ucsc.edu/cgi-bin/hgTracks?db=hg19&position=chr3:179476786-181605410&hgsid=443362677_4V80BwZqd7j9QbFDPX1nAl3yp6cs
3	181564104	186789472	461	-0.2233	http://genome.ucsc.edu/cgi-bin/hgTracks?db=hg19&position=chr3:181514104-186839472&hgsid=443362677_4V80BwZqd7j9QbFDPX1nAl3yp6cs
3	186805709	187047291	16	-1.2443	http://genome.ucsc.edu/cgi-bin/hgTracks?db=hg19&position=chr3:186755709-187097291&hgsid=443362677_4V80BwZqd7j9QbFDPX1nAl3yp6cs
3	187063833	190462866	122	-0.1414	http://genome.ucsc.edu/cgi-bin/hgTracks?db=hg19&position=chr3:187013833-190512866&hgsid=443362677_4V80BwZqd7j9QbFDPX1nAl3yp6cs
3	190468850	192432400	71	-0.9488	http://genome.ucsc.edu/cgi-bin/hgTracks?db=hg19&position=chr3:190418850-192482400&hgsid=443362677_4V80BwZqd7j9QbFDPX1nAl3yp6cs
3	192556310	197887341	479	-0.2088	http://genome.ucsc.edu/cgi-bin/hgTracks?db=hg19&position=chr3:192506310-197937341&hgsid=443362677_4V80BwZqd7j9QbFDPX1nAl3yp6cs
4	50401	16647084	671	-0.3189	http://genome.ucsc.edu/cgi-bin/hgTracks?db=hg19&position=chr4:401-16697084&hgsid=443362677_4V80BwZqd7j9QbFDPX1nAl3yp6cs
4	16657615	17316128	29	-1.1085	http://genome.ucsc.edu/cgi-bin/hgTracks?db=hg19&position=chr4:16607615-17366128&hgsid=443362677_4V80BwZqd7j9QbFDPX1nAl3yp6cs
4	17347675	18624118	58	-0.3376	http://genome.ucsc.edu/cgi-bin/hgTracks?db=hg19&position=chr4:17297675-18674118&hgsid=443362677_4V80BwZqd7j9QbFDPX1nAl3yp6cs
4	18667451	21717952	85	-1.0081	http://genome.ucsc.edu/cgi-bin/hgTracks?db=hg19&position=chr4:18617451-21767952&hgsid=443362677_4V80BwZqd7j9QbFDPX1nAl3yp6cs
4	21788283	27173871	207	-0.3117	http://genome.ucsc.edu/cgi-bin/hgTracks?db=hg19&position=chr4:21738283-27223871&hgsid=443362677_4V80BwZqd7j9QbFDPX1nAl3yp6cs
4	27190973	35814926	231	-0.9329	http://genome.ucsc.edu/cgi-bin/hgTracks?db=hg19&position=chr4:27140973-35864926&hgsid=443362677_4V80BwZqd7j9QbFDPX1nAl3yp6cs
4	35852735	42801547	463	-0.231	http://genome.ucsc.edu/cgi-bin/hgTracks?db=hg19&position=chr4:35802735-42851547&hgsid=443362677_4V80BwZqd7j9QbFDPX1nAl3yp6cs
4	42844795	47418560	95	-0.932	http://genome.ucsc.edu/cgi-bin/hgTracks?db=hg19&position=chr4:42794795-47468560&hgsid=443362677_4V80BwZqd7j9QbFDPX1nAl3yp6cs
4	47458188	49619217	75	-0.3531	http://genome.ucsc.edu/cgi-bin/hgTracks?db=hg19&position=chr4:47408188-49669217&hgsid=443362677_4V80BwZqd7j9QbFDPX1nAl3yp6cs
4	52747218	57880761	236	-0.2965	http://genome.ucsc.edu/cgi-bin/hgTracks?db=hg19&position=chr4:52697218-57930761&hgsid=443362677_4V80BwZqd7j9QbFDPX1nAl3yp6cs
4	57905156	67826209	224	-0.9255	http://genome.ucsc.edu/cgi-bin/hgTracks?db=hg19&position=chr4:57855156-67876209&hgsid=443362677_4V80BwZqd7j9QbFDPX1nAl3yp6cs
4	67861649	85923738	661	-0.3319	http://genome.ucsc.edu/cgi-bin/hgTracks?db=hg19&position=chr4:67811649-85973738&hgsid=443362677_4V80BwZqd7j9QbFDPX1nAl3yp6cs
4	85932802	86692955	24	-1.3053	http://genome.ucsc.edu/cgi-bin/hgTracks?db=hg19&position=chr4:85882802-86742955&hgsid=443362677_4V80BwZqd7j9QbFDPX1nAl3yp6cs
4	86718418	92966538	232	-0.2508	http://genome.ucsc.edu/cgi-bin/hgTracks?db=hg19&position=chr4:86668418-93016538&hgsid=443362677_4V80BwZqd7j9QbFDPX1nAl3yp6cs
4	93052715	99121095	174	-0.7467	http://genome.ucsc.edu/cgi-bin/hgTracks?db=hg19&position=chr4:93002715-99171095&hgsid=443362677_4V80BwZqd7j9QbFDPX1nAl3yp6cs
4	99137939	109722120	324	-0.3443	http://genome.ucsc.edu/cgi-bin/hgTracks?db=hg19&position=chr4:99087939-109772120&hgsid=443362677_4V80BwZqd7j9QbFDPX1nAl3yp6cs
4	109792564	110238947	15	-1.2413	http://genome.ucsc.edu/cgi-bin/hgTracks?db=hg19&position=chr4:109742564-110288947&hgsid=443362677_4V80BwZqd7j9QbFDPX1nAl3yp6cs
4	110252289	111116366	57	-0.0205	http://genome.ucsc.edu/cgi-bin/hgTracks?db=hg19&position=chr4:110202289-111166366&hgsid=443362677_4V80BwZqd7j9QbFDPX1nAl3yp6cs
4	111126153	113059317	58	-0.6659	http://genome.ucsc.edu/cgi-bin/hgTracks?db=hg19&position=chr4:111076153-113109317&hgsid=443362677_4V80BwZqd7j9QbFDPX1nAl3yp6cs
4	113064507	113591714	29	0.0058	http://genome.ucsc.edu/cgi-bin/hgTracks?db=hg19&position=chr4:113014507-113641714&hgsid=443362677_4V80BwZqd7j9QbFDPX1nAl3yp6cs
4	113593664	114242981	58	-0.8149	http://genome.ucsc.edu/cgi-bin/hgTracks?db=hg19&position=chr4:113543664-114292981&hgsid=443362677_4V80BwZqd7j9QbFDPX1nAl3yp6cs
4	114263780	115855634	45	-0.2518	http://genome.ucsc.edu/cgi-bin/hgTracks?db=hg19&position=chr4:114213780-115905634&hgsid=443362677_4V80BwZqd7j9QbFDPX1nAl3yp6cs
4	115890394	118984269	79	-0.8676	http://genome.ucsc.edu/cgi-bin/hgTracks?db=hg19&position=chr4:115840394-119034269&hgsid=443362677_4V80BwZqd7j9QbFDPX1nAl3yp6cs
4	119065428	120791605	77	-0.2881	http://genome.ucsc.edu/cgi-bin/hgTracks?db=hg19&position=chr4:119015428-120841605&hgsid=443362677_4V80BwZqd7j9QbFDPX1nAl3yp6cs
4	120802721	123607511	87	-0.6968	http://genome.ucsc.edu/cgi-bin/hgTracks?db=hg19&position=chr4:120752721-123657511&hgsid=443362677_4V80BwZqd7j9QbFDPX1nAl3yp6cs
4	123640067	125720887	74	-0.2471	http://genome.ucsc.edu/cgi-bin/hgTracks?db=hg19&position=chr4:123590067-125770887&hgsid=443362677_4V80BwZqd7j9QbFDPX1nAl3yp6cs
4	125749306	128442031	65	-1.0395	http://genome.ucsc.edu/cgi-bin/hgTracks?db=hg19&position=chr4:125699306-128492031&hgsid=443362677_4V80BwZqd7j9QbFDPX1nAl3yp6cs
4	128491232	130201798	110	-0.2311	http://genome.ucsc.edu/cgi-bin/hgTracks?db=hg19&position=chr4:128441232-130251798&hgsid=443362677_4V80BwZqd7j9QbFDPX1nAl3yp6cs
4	130231140	138851872	181	-0.9482	http://genome.ucsc.edu/cgi-bin/hgTracks?db=hg19&position=chr4:130181140-138901872&hgsid=443362677_4V80BwZqd7j9QbFDPX1nAl3yp6cs
4	138908888	154637140	582	-0.2546	http://genome.ucsc.edu/cgi-bin/hgTracks?db=hg19&position=chr4:138858888-154687140&hgsid=443362677_4V80BwZqd7j9QbFDPX1nAl3yp6cs
4	154665498	159017906	107	-1.0261	http://genome.ucsc.edu/cgi-bin/hgTracks?db=hg19&position=chr4:154615498-159067906&hgsid=443362677_4V80BwZqd7j9QbFDPX1nAl3yp6cs
4	159056397	160358491	64	-0.2202	http://genome.ucsc.edu/cgi-bin/hgTracks?db=hg19&position=chr4:159006397-160408491&hgsid=443362677_4V80BwZqd7j9QbFDPX1nAl3yp6cs
4	160359119	165616335	148	-0.9659	http://genome.ucsc.edu/cgi-bin/hgTracks?db=hg19&position=chr4:160309119-165666335&hgsid=443362677_4V80BwZqd7j9QbFDPX1nAl3yp6cs
4	165660991	165723309	8	-0.0399	http://genome.ucsc.edu/cgi-bin/hgTracks?db=hg19&position=chr4:165610991-165773309&hgsid=443362677_4V80BwZqd7j9QbFDPX1nAl3yp6cs
4	165735677	165958568	24	-0.8836	http://genome.ucsc.edu/cgi-bin/hgTracks?db=hg19&position=chr4:165685677-166008568&hgsid=443362677_4V80BwZqd7j9QbFDPX1nAl3yp6cs
4	165960874	166401068	33	-0.315	http://genome.ucsc.edu/cgi-bin/hgTracks?db=hg19&position=chr4:165910874-166451068&hgsid=443362677_4V80BwZqd7j9QbFDPX1nAl3yp6cs
4	166411709	169014752	68	-0.9475	http://genome.ucsc.edu/cgi-bin/hgTracks?db=hg19&position=chr4:166361709-169064752&hgsid=443362677_4V80BwZqd7j9QbFDPX1nAl3yp6cs
4	169102466	171094438	102	-0.0894	http://genome.ucsc.edu/cgi-bin/hgTracks?db=hg19&position=chr4:169052466-171144438&hgsid=443362677_4V80BwZqd7j9QbFDPX1nAl3yp6cs
4	171154438	173579225	61	-1.0211	http://genome.ucsc.edu/cgi-bin/hgTracks?db=hg19&position=chr4:171104438-173629225&hgsid=443362677_4V80BwZqd7j9QbFDPX1nAl3yp6cs
4	173608703	174504452	24	-0.2094	http://genome.ucsc.edu/cgi-bin/hgTracks?db=hg19&position=chr4:173558703-174554452&hgsid=443362677_4V80BwZqd7j9QbFDPX1nAl3yp6cs
4	174630222	174729542	3	-2.1137	http://genome.ucsc.edu/cgi-bin/hgTracks?db=hg19&position=chr4:174580222-174779542&hgsid=443362677_4V80BwZqd7j9QbFDPX1nAl3yp6cs
4	174783082	189254532	716	-0.623	http://genome.ucsc.edu/cgi-bin/hgTracks?db=hg19&position=chr4:174733082-189304532&hgsid=443362677_4V80BwZqd7j9QbFDPX1nAl3yp6cs
4	189259180	190721126	71	-1.1764	http://genome.ucsc.edu/cgi-bin/hgTracks?db=hg19&position=chr4:189209180-190771126&hgsid=443362677_4V80BwZqd7j9QbFDPX1nAl3yp6cs
4	190766057	190974285	9	-0.4025	http://genome.ucsc.edu/cgi-bin/hgTracks?db=hg19&position=chr4:190716057-191024285&hgsid=443362677_4V80BwZqd7j9QbFDPX1nAl3yp6cs
5	28689	8780979	230	-0.8066	http://genome.ucsc.edu/cgi-bin/hgTracks?db=hg19&position=chr5:-21311-8830979&hgsid=443362677_4V80BwZqd7j9QbFDPX1nAl3yp6cs
5	8835246	9707719	22	0.1195	http://genome.ucsc.edu/cgi-bin/hgTracks?db=hg19&position=chr5:8785246-9757719&hgsid=443362677_4V80BwZqd7j9QbFDPX1nAl3yp6cs
5	9718164	13795000	115	-0.9663	http://genome.ucsc.edu/cgi-bin/hgTracks?db=hg19&position=chr5:9668164-13845000&hgsid=443362677_4V80BwZqd7j9QbFDPX1nAl3yp6cs
5	13798968	15470779	63	-0.317	http://genome.ucsc.edu/cgi-bin/hgTracks?db=hg19&position=chr5:13748968-15520779&hgsid=443362677_4V80BwZqd7j9QbFDPX1nAl3yp6cs
5	15517228	16063629	19	-1.285	http://genome.ucsc.edu/cgi-bin/hgTracks?db=hg19&position=chr5:15467228-16113629&hgsid=443362677_4V80BwZqd7j9QbFDPX1nAl3yp6cs
5	16085973	17267720	96	-0.2458	http://genome.ucsc.edu/cgi-bin/hgTracks?db=hg19&position=chr5:16035973-17317720&hgsid=443362677_4V80BwZqd7j9QbFDPX1nAl3yp6cs
5	17295428	32080378	517	-0.9228	http://genome.ucsc.edu/cgi-bin/hgTracks?db=hg19&position=chr5:17245428-32130378&hgsid=443362677_4V80BwZqd7j9QbFDPX1nAl3yp6cs
5	32098288	32466797	40	-0.2852	http://genome.ucsc.edu/cgi-bin/hgTracks?db=hg19&position=chr5:32048288-32516797&hgsid=443362677_4V80BwZqd7j9QbFDPX1nAl3yp6cs
5	32480879	33966638	46	-0.8164	http://genome.ucsc.edu/cgi-bin/hgTracks?db=hg19&position=chr5:32430879-34016638&hgsid=443362677_4V80BwZqd7j9QbFDPX1nAl3yp6cs
5	34028170	35649040	75	-0.3074	http://genome.ucsc.edu/cgi-bin/hgTracks?db=hg19&position=chr5:33978170-35699040&hgsid=443362677_4V80BwZqd7j9QbFDPX1nAl3yp6cs
5	35676755	37218006	53	-0.8781	http://genome.ucsc.edu/cgi-bin/hgTracks?db=hg19&position=chr5:35626755-37268006&hgsid=443362677_4V80BwZqd7j9QbFDPX1nAl3yp6cs
5	37230202	37759636	51	-0.1737	http://genome.ucsc.edu/cgi-bin/hgTracks?db=hg19&position=chr5:37180202-37809636&hgsid=443362677_4V80BwZqd7j9QbFDPX1nAl3yp6cs
5	37792363	38565782	19	-1.3014	http://genome.ucsc.edu/cgi-bin/hgTracks?db=hg19&position=chr5:37742363-38615782&hgsid=443362677_4V80BwZqd7j9QbFDPX1nAl3yp6cs
5	38578746	46164323	235	-0.5053	http://genome.ucsc.edu/cgi-bin/hgTracks?db=hg19&position=chr5:38528746-46214323&hgsid=443362677_4V80BwZqd7j9QbFDPX1nAl3yp6cs
5	49486520	82457910	1345	-0.3264	http://genome.ucsc.edu/cgi-bin/hgTracks?db=hg19&position=chr5:49436520-82507910&hgsid=443362677_4V80BwZqd7j9QbFDPX1nAl3yp6cs
5	82547267	85900853	81	-1.0201	http://genome.ucsc.edu/cgi-bin/hgTracks?db=hg19&position=chr5:82497267-85950853&hgsid=443362677_4V80BwZqd7j9QbFDPX1nAl3yp6cs
5	85911885	122196384	959	-0.5114	http://genome.ucsc.edu/cgi-bin/hgTracks?db=hg19&position=chr5:85861885-122246384&hgsid=443362677_4V80BwZqd7j9QbFDPX1nAl3yp6cs
5	122201118	122252876	3	-1.7098	http://genome.ucsc.edu/cgi-bin/hgTracks?db=hg19&position=chr5:122151118-122302876&hgsid=443362677_4V80BwZqd7j9QbFDPX1nAl3yp6cs
5	122274559	126654860	171	-0.2056	http://genome.ucsc.edu/cgi-bin/hgTracks?db=hg19&position=chr5:122224559-126704860&hgsid=443362677_4V80BwZqd7j9QbFDPX1nAl3yp6cs
5	126715384	129981444	90	-0.7302	http://genome.ucsc.edu/cgi-bin/hgTracks?db=hg19&position=chr5:126665384-130031444&hgsid=443362677_4V80BwZqd7j9QbFDPX1nAl3yp6cs
5	130098685	132656623	160	-0.1445	http://genome.ucsc.edu/cgi-bin/hgTracks?db=hg19&position=chr5:130048685-132706623&hgsid=443362677_4V80BwZqd7j9QbFDPX1nAl3yp6cs
5	132680753	133239302	12	-1.0994	http://genome.ucsc.edu/cgi-bin/hgTracks?db=hg19&position=chr5:132630753-133289302&hgsid=443362677_4V80BwZqd7j9QbFDPX1nAl3yp6cs
5	133247893	133647120	43	-0.0911	http://genome.ucsc.edu/cgi-bin/hgTracks?db=hg19&position=chr5:133197893-133697120&hgsid=443362677_4V80BwZqd7j9QbFDPX1nAl3yp6cs
5	133649759	133689335	4	-1.6325	http://genome.ucsc.edu/cgi-bin/hgTracks?db=hg19&position=chr5:133599759-133739335&hgsid=443362677_4V80BwZqd7j9QbFDPX1nAl3yp6cs
5	133698134	135494512	126	-0.1572	http://genome.ucsc.edu/cgi-bin/hgTracks?db=hg19&position=chr5:133648134-135544512&hgsid=443362677_4V80BwZqd7j9QbFDPX1nAl3yp6cs
5	135532570	137199416	41	-0.9965	http://genome.ucsc.edu/cgi-bin/hgTracks?db=hg19&position=chr5:135482570-137249416&hgsid=443362677_4V80BwZqd7j9QbFDPX1nAl3yp6cs
5	137210080	142558527	465	-0.22	http://genome.ucsc.edu/cgi-bin/hgTracks?db=hg19&position=chr5:137160080-142608527&hgsid=443362677_4V80BwZqd7j9QbFDPX1nAl3yp6cs
5	142634323	144518689	57	-0.7988	http://genome.ucsc.edu/cgi-bin/hgTracks?db=hg19&position=chr5:142584323-144568689&hgsid=443362677_4V80BwZqd7j9QbFDPX1nAl3yp6cs
5	144555596	150479616	241	-0.2579	http://genome.ucsc.edu/cgi-bin/hgTracks?db=hg19&position=chr5:144505596-150529616&hgsid=443362677_4V80BwZqd7j9QbFDPX1nAl3yp6cs
5	150529140	153442652	77	-0.7933	http://genome.ucsc.edu/cgi-bin/hgTracks?db=hg19&position=chr5:150479140-153492652&hgsid=443362677_4V80BwZqd7j9QbFDPX1nAl3yp6cs
5	153443484	154356792	69	-0.1786	http://genome.ucsc.edu/cgi-bin/hgTracks?db=hg19&position=chr5:153393484-154406792&hgsid=443362677_4V80BwZqd7j9QbFDPX1nAl3yp6cs
5	154358665	156520880	65	-0.9611	http://genome.ucsc.edu/cgi-bin/hgTracks?db=hg19&position=chr5:154308665-156570880&hgsid=443362677_4V80BwZqd7j9QbFDPX1nAl3yp6cs
5	156525342	157633778	58	-0.2632	http://genome.ucsc.edu/cgi-bin/hgTracks?db=hg19&position=chr5:156475342-157683778&hgsid=443362677_4V80BwZqd7j9QbFDPX1nAl3yp6cs
5	157649456	167347447	352	-0.749	http://genome.ucsc.edu/cgi-bin/hgTracks?db=hg19&position=chr5:157599456-167397447&hgsid=443362677_4V80BwZqd7j9QbFDPX1nAl3yp6cs
5	167423836	168168400	39	-0.0216	http://genome.ucsc.edu/cgi-bin/hgTracks?db=hg19&position=chr5:167373836-168218400&hgsid=443362677_4V80BwZqd7j9QbFDPX1nAl3yp6cs
5	168178835	170252559	58	-1.1153	http://genome.ucsc.edu/cgi-bin/hgTracks?db=hg19&position=chr5:168128835-170302559&hgsid=443362677_4V80BwZqd7j9QbFDPX1nAl3yp6cs
5	170255947	180706713	871	-0.4116	http://genome.ucsc.edu/cgi-bin/hgTracks?db=hg19&position=chr5:170205947-180756713&hgsid=443362677_4V80BwZqd7j9QbFDPX1nAl3yp6cs
6	132520	49561578	2995	-0.4596	http://genome.ucsc.edu/cgi-bin/hgTracks?db=hg19&position=chr6:82520-49611578&hgsid=443362677_4V80BwZqd7j9QbFDPX1nAl3yp6cs
6	49579547	52135051	63	-1.0778	http://genome.ucsc.edu/cgi-bin/hgTracks?db=hg19&position=chr6:49529547-52185051&hgsid=443362677_4V80BwZqd7j9QbFDPX1nAl3yp6cs
6	52157120	58674548	230	-0.4548	http://genome.ucsc.edu/cgi-bin/hgTracks?db=hg19&position=chr6:52107120-58724548&hgsid=443362677_4V80BwZqd7j9QbFDPX1nAl3yp6cs
6	62041228	63089772	21	-1.2901	http://genome.ucsc.edu/cgi-bin/hgTracks?db=hg19&position=chr6:61991228-63139772&hgsid=443362677_4V80BwZqd7j9QbFDPX1nAl3yp6cs
6	63091282	74094994	293	-0.8192	http://genome.ucsc.edu/cgi-bin/hgTracks?db=hg19&position=chr6:63041282-74144994&hgsid=443362677_4V80BwZqd7j9QbFDPX1nAl3yp6cs
6	74095910	74373524	51	-0.1396	http://genome.ucsc.edu/cgi-bin/hgTracks?db=hg19&position=chr6:74045910-74423524&hgsid=443362677_4V80BwZqd7j9QbFDPX1nAl3yp6cs
6	74396507	75855440	38	-0.9384	http://genome.ucsc.edu/cgi-bin/hgTracks?db=hg19&position=chr6:74346507-75905440&hgsid=443362677_4V80BwZqd7j9QbFDPX1nAl3yp6cs
6	75949741	77099550	55	-0.335	http://genome.ucsc.edu/cgi-bin/hgTracks?db=hg19&position=chr6:75899741-77149550&hgsid=443362677_4V80BwZqd7j9QbFDPX1nAl3yp6cs
6	77120287	79046188	34	-1.1561	http://genome.ucsc.edu/cgi-bin/hgTracks?db=hg19&position=chr6:77070287-79096188&hgsid=443362677_4V80BwZqd7j9QbFDPX1nAl3yp6cs
6	79127723	86390771	185	-0.3876	http://genome.ucsc.edu/cgi-bin/hgTracks?db=hg19&position=chr6:79077723-86440771&hgsid=443362677_4V80BwZqd7j9QbFDPX1nAl3yp6cs
6	86417945	87805938	23	-1.1913	http://genome.ucsc.edu/cgi-bin/hgTracks?db=hg19&position=chr6:86367945-87855938&hgsid=443362677_4V80BwZqd7j9QbFDPX1nAl3yp6cs
6	87822825	170866748	3209	-0.4288	http://genome.ucsc.edu/cgi-bin/hgTracks?db=hg19&position=chr6:87772825-170916748&hgsid=443362677_4V80BwZqd7j9QbFDPX1nAl3yp6cs
7	28262	1232840	61	-0.3802	http://genome.ucsc.edu/cgi-bin/hgTracks?db=hg19&position=chr7:-21738-1282840&hgsid=443362677_4V80BwZqd7j9QbFDPX1nAl3yp6cs
7	1238875	1829684	35	-1.1777	http://genome.ucsc.edu/cgi-bin/hgTracks?db=hg19&position=chr7:1188875-1879684&hgsid=443362677_4V80BwZqd7j9QbFDPX1nAl3yp6cs
7	1830590	18785262	880	-0.5797	http://genome.ucsc.edu/cgi-bin/hgTracks?db=hg19&position=chr7:1780590-18835262&hgsid=443362677_4V80BwZqd7j9QbFDPX1nAl3yp6cs
7	18862070	19707320	28	-1.5442	http://genome.ucsc.edu/cgi-bin/hgTracks?db=hg19&position=chr7:18812070-19757320&hgsid=443362677_4V80BwZqd7j9QbFDPX1nAl3yp6cs
7	19727064	22897262	115	-0.5561	http://genome.ucsc.edu/cgi-bin/hgTracks?db=hg19&position=chr7:19677064-22947262&hgsid=443362677_4V80BwZqd7j9QbFDPX1nAl3yp6cs
7	22914231	23035836	9	-2.0375	http://genome.ucsc.edu/cgi-bin/hgTracks?db=hg19&position=chr7:22864231-23085836&hgsid=443362677_4V80BwZqd7j9QbFDPX1nAl3yp6cs
7	23044517	40205645	727	-0.5797	http://genome.ucsc.edu/cgi-bin/hgTracks?db=hg19&position=chr7:22994517-40255645&hgsid=443362677_4V80BwZqd7j9QbFDPX1nAl3yp6cs
7	40214911	43606342	126	-1.2386	http://genome.ucsc.edu/cgi-bin/hgTracks?db=hg19&position=chr7:40164911-43656342&hgsid=443362677_4V80BwZqd7j9QbFDPX1nAl3yp6cs
7	43624720	45138569	128	-0.3865	http://genome.ucsc.edu/cgi-bin/hgTracks?db=hg19&position=chr7:43574720-45188569&hgsid=443362677_4V80BwZqd7j9QbFDPX1nAl3yp6cs
7	45324815	45673325	16	-1.5068	http://genome.ucsc.edu/cgi-bin/hgTracks?db=hg19&position=chr7:45274815-45723325&hgsid=443362677_4V80BwZqd7j9QbFDPX1nAl3yp6cs
7	45676232	48334136	124	-0.5504	http://genome.ucsc.edu/cgi-bin/hgTracks?db=hg19&position=chr7:45626232-48384136&hgsid=443362677_4V80BwZqd7j9QbFDPX1nAl3yp6cs
7	48374024	50178869	33	-1.3343	http://genome.ucsc.edu/cgi-bin/hgTracks?db=hg19&position=chr7:48324024-50228869&hgsid=443362677_4V80BwZqd7j9QbFDPX1nAl3yp6cs
7	50182853	52513475	74	-0.4931	http://genome.ucsc.edu/cgi-bin/hgTracks?db=hg19&position=chr7:50132853-52563475&hgsid=443362677_4V80BwZqd7j9QbFDPX1nAl3yp6cs
7	52528676	54794364	55	-1.4639	http://genome.ucsc.edu/cgi-bin/hgTracks?db=hg19&position=chr7:52478676-54844364&hgsid=443362677_4V80BwZqd7j9QbFDPX1nAl3yp6cs
7	54815565	56496676	144	-0.5102	http://genome.ucsc.edu/cgi-bin/hgTracks?db=hg19&position=chr7:54765565-56546676&hgsid=443362677_4V80BwZqd7j9QbFDPX1nAl3yp6cs
7	56505967	56669964	20	-1.5907	http://genome.ucsc.edu/cgi-bin/hgTracks?db=hg19&position=chr7:56455967-56719964&hgsid=443362677_4V80BwZqd7j9QbFDPX1nAl3yp6cs
7	56672335	57873380	79	-0.6856	http://genome.ucsc.edu/cgi-bin/hgTracks?db=hg19&position=chr7:56622335-57923380&hgsid=443362677_4V80BwZqd7j9QbFDPX1nAl3yp6cs
7	61060852	64020584	103	-0.8635	http://genome.ucsc.edu/cgi-bin/hgTracks?db=hg19&position=chr7:61010852-64070584&hgsid=443362677_4V80BwZqd7j9QbFDPX1nAl3yp6cs
7	64022534	66847386	312	-0.3464	http://genome.ucsc.edu/cgi-bin/hgTracks?db=hg19&position=chr7:63972534-66897386&hgsid=443362677_4V80BwZqd7j9QbFDPX1nAl3yp6cs
7	66849577	69503837	212	-1.2303	http://genome.ucsc.edu/cgi-bin/hgTracks?db=hg19&position=chr7:66799577-69553837&hgsid=443362677_4V80BwZqd7j9QbFDPX1nAl3yp6cs
7	69521066	70298298	53	-0.3155	http://genome.ucsc.edu/cgi-bin/hgTracks?db=hg19&position=chr7:69471066-70348298&hgsid=443362677_4V80BwZqd7j9QbFDPX1nAl3yp6cs
7	70340963	71971231	114	-1.111	http://genome.ucsc.edu/cgi-bin/hgTracks?db=hg19&position=chr7:70290963-72021231&hgsid=443362677_4V80BwZqd7j9QbFDPX1nAl3yp6cs
7	71990612	77583543	573	-0.294	http://genome.ucsc.edu/cgi-bin/hgTracks?db=hg19&position=chr7:71940612-77633543&hgsid=443362677_4V80BwZqd7j9QbFDPX1nAl3yp6cs
7	77604543	80335500	93	-0.8539	http://genome.ucsc.edu/cgi-bin/hgTracks?db=hg19&position=chr7:77554543-80385500&hgsid=443362677_4V80BwZqd7j9QbFDPX1nAl3yp6cs
7	80353030	81111065	37	-0.1061	http://genome.ucsc.edu/cgi-bin/hgTracks?db=hg19&position=chr7:80303030-81161065&hgsid=443362677_4V80BwZqd7j9QbFDPX1nAl3yp6cs
7	81115340	83531392	79	-0.9794	http://genome.ucsc.edu/cgi-bin/hgTracks?db=hg19&position=chr7:81065340-83581392&hgsid=443362677_4V80BwZqd7j9QbFDPX1nAl3yp6cs
7	83582511	83910021	19	0.249	http://genome.ucsc.edu/cgi-bin/hgTracks?db=hg19&position=chr7:83532511-83960021&hgsid=443362677_4V80BwZqd7j9QbFDPX1nAl3yp6cs
7	83917938	86323752	50	-0.9536	http://genome.ucsc.edu/cgi-bin/hgTracks?db=hg19&position=chr7:83867938-86373752&hgsid=443362677_4V80BwZqd7j9QbFDPX1nAl3yp6cs
7	86433818	88069155	42	-0.2426	http://genome.ucsc.edu/cgi-bin/hgTracks?db=hg19&position=chr7:86383818-88119155&hgsid=443362677_4V80BwZqd7j9QbFDPX1nAl3yp6cs
7	88361378	89714638	25	-1.5163	http://genome.ucsc.edu/cgi-bin/hgTracks?db=hg19&position=chr7:88311378-89764638&hgsid=443362677_4V80BwZqd7j9QbFDPX1nAl3yp6cs
7	89770967	90091388	17	-0.1295	http://genome.ucsc.edu/cgi-bin/hgTracks?db=hg19&position=chr7:89720967-90141388&hgsid=443362677_4V80BwZqd7j9QbFDPX1nAl3yp6cs
7	90128990	91551151	39	-1.302	http://genome.ucsc.edu/cgi-bin/hgTracks?db=hg19&position=chr7:90078990-91601151&hgsid=443362677_4V80BwZqd7j9QbFDPX1nAl3yp6cs
7	91579636	108353063	992	-0.4937	http://genome.ucsc.edu/cgi-bin/hgTracks?db=hg19&position=chr7:91529636-108403063&hgsid=443362677_4V80BwZqd7j9QbFDPX1nAl3yp6cs
7	108379148	109974063	26	-1.3715	http://genome.ucsc.edu/cgi-bin/hgTracks?db=hg19&position=chr7:108329148-110024063&hgsid=443362677_4V80BwZqd7j9QbFDPX1nAl3yp6cs
7	110025545	114320723	118	-0.6292	http://genome.ucsc.edu/cgi-bin/hgTracks?db=hg19&position=chr7:109975545-114370723&hgsid=443362677_4V80BwZqd7j9QbFDPX1nAl3yp6cs
7	114391262	115992005	35	-1.264	http://genome.ucsc.edu/cgi-bin/hgTracks?db=hg19&position=chr7:114341262-116042005&hgsid=443362677_4V80BwZqd7j9QbFDPX1nAl3yp6cs
7	115993145	135626724	761	-0.4877	http://genome.ucsc.edu/cgi-bin/hgTracks?db=hg19&position=chr7:115943145-135676724&hgsid=443362677_4V80BwZqd7j9QbFDPX1nAl3yp6cs
7	135704543	136488621	24	-1.4885	http://genome.ucsc.edu/cgi-bin/hgTracks?db=hg19&position=chr7:135654543-136538621&hgsid=443362677_4V80BwZqd7j9QbFDPX1nAl3yp6cs
7	136488974	138474638	103	-0.7869	http://genome.ucsc.edu/cgi-bin/hgTracks?db=hg19&position=chr7:136438974-138524638&hgsid=443362677_4V80BwZqd7j9QbFDPX1nAl3yp6cs
7	138498314	140799722	202	-0.3126	http://genome.ucsc.edu/cgi-bin/hgTracks?db=hg19&position=chr7:138448314-140849722&hgsid=443362677_4V80BwZqd7j9QbFDPX1nAl3yp6cs
7	140838708	141245767	16	-1.4675	http://genome.ucsc.edu/cgi-bin/hgTracks?db=hg19&position=chr7:140788708-141295767&hgsid=443362677_4V80BwZqd7j9QbFDPX1nAl3yp6cs
7	141250223	144253111	100	-0.4984	http://genome.ucsc.edu/cgi-bin/hgTracks?db=hg19&position=chr7:141200223-144303111&hgsid=443362677_4V80BwZqd7j9QbFDPX1nAl3yp6cs
7	144263288	147696267	146	-1.2547	http://genome.ucsc.edu/cgi-bin/hgTracks?db=hg19&position=chr7:144213288-147746267&hgsid=443362677_4V80BwZqd7j9QbFDPX1nAl3yp6cs
7	147751157	159109010	621	-0.5583	http://genome.ucsc.edu/cgi-bin/hgTracks?db=hg19&position=chr7:147701157-159159010&hgsid=443362677_4V80BwZqd7j9QbFDPX1nAl3yp6cs
8	207053	2211394	62	-0.1502	http://genome.ucsc.edu/cgi-bin/hgTracks?db=hg19&position=chr8:157053-2261394&hgsid=443362677_4V80BwZqd7j9QbFDPX1nAl3yp6cs
8	2240670	4612584	82	-0.7508	http://genome.ucsc.edu/cgi-bin/hgTracks?db=hg19&position=chr8:2190670-4662584&hgsid=443362677_4V80BwZqd7j9QbFDPX1nAl3yp6cs
8	4692403	9656239	234	-0.1973	http://genome.ucsc.edu/cgi-bin/hgTracks?db=hg19&position=chr8:4642403-9706239&hgsid=443362677_4V80BwZqd7j9QbFDPX1nAl3yp6cs
8	9671524	9835333	10	-1.258	http://genome.ucsc.edu/cgi-bin/hgTracks?db=hg19&position=chr8:9621524-9885333&hgsid=443362677_4V80BwZqd7j9QbFDPX1nAl3yp6cs
8	9844636	34592078	1063	-0.1949	http://genome.ucsc.edu/cgi-bin/hgTracks?db=hg19&position=chr8:9794636-34642078&hgsid=443362677_4V80BwZqd7j9QbFDPX1nAl3yp6cs
8	34623920	36657145	51	-0.6593	http://genome.ucsc.edu/cgi-bin/hgTracks?db=hg19&position=chr8:34573920-36707145&hgsid=443362677_4V80BwZqd7j9QbFDPX1nAl3yp6cs
8	36683820	39055989	152	-0.1201	http://genome.ucsc.edu/cgi-bin/hgTracks?db=hg19&position=chr8:36633820-39105989&hgsid=443362677_4V80BwZqd7j9QbFDPX1nAl3yp6cs
8	39150441	39832364	24	-0.9784	http://genome.ucsc.edu/cgi-bin/hgTracks?db=hg19&position=chr8:39100441-39882364&hgsid=443362677_4V80BwZqd7j9QbFDPX1nAl3yp6cs
8	39849182	40116479	18	0.1962	http://genome.ucsc.edu/cgi-bin/hgTracks?db=hg19&position=chr8:39799182-40166479&hgsid=443362677_4V80BwZqd7j9QbFDPX1nAl3yp6cs
8	40120627	41276924	36	-0.9997	http://genome.ucsc.edu/cgi-bin/hgTracks?db=hg19&position=chr8:40070627-41326924&hgsid=443362677_4V80BwZqd7j9QbFDPX1nAl3yp6cs
8	41284814	42555249	119	-0.1722	http://genome.ucsc.edu/cgi-bin/hgTracks?db=hg19&position=chr8:41234814-42605249&hgsid=443362677_4V80BwZqd7j9QbFDPX1nAl3yp6cs
8	42557830	42680533	24	-1.0231	http://genome.ucsc.edu/cgi-bin/hgTracks?db=hg19&position=chr8:42507830-42730533&hgsid=443362677_4V80BwZqd7j9QbFDPX1nAl3yp6cs
8	42682021	43801451	59	-0.3244	http://genome.ucsc.edu/cgi-bin/hgTracks?db=hg19&position=chr8:42632021-43851451&hgsid=443362677_4V80BwZqd7j9QbFDPX1nAl3yp6cs
8	46864127	49820625	114	-0.5234	http://genome.ucsc.edu/cgi-bin/hgTracks?db=hg19&position=chr8:46814127-49870625&hgsid=443362677_4V80BwZqd7j9QbFDPX1nAl3yp6cs
8	49982418	52621907	65	-1.3001	http://genome.ucsc.edu/cgi-bin/hgTracks?db=hg19&position=chr8:49932418-52671907&hgsid=443362677_4V80BwZqd7j9QbFDPX1nAl3yp6cs
8	52655870	55067914	128	-0.4728	http://genome.ucsc.edu/cgi-bin/hgTracks?db=hg19&position=chr8:52605870-55117914&hgsid=443362677_4V80BwZqd7j9QbFDPX1nAl3yp6cs
8	55076851	56509165	51	-1.1474	http://genome.ucsc.edu/cgi-bin/hgTracks?db=hg19&position=chr8:55026851-56559165&hgsid=443362677_4V80BwZqd7j9QbFDPX1nAl3yp6cs
8	56524433	57022777	40	-0.5003	http://genome.ucsc.edu/cgi-bin/hgTracks?db=hg19&position=chr8:56474433-57072777&hgsid=443362677_4V80BwZqd7j9QbFDPX1nAl3yp6cs
8	57035831	61022255	116	-1.3452	http://genome.ucsc.edu/cgi-bin/hgTracks?db=hg19&position=chr8:56985831-61072255&hgsid=443362677_4V80BwZqd7j9QbFDPX1nAl3yp6cs
8	61050782	64141080	77	-0.4875	http://genome.ucsc.edu/cgi-bin/hgTracks?db=hg19&position=chr8:61000782-64191080&hgsid=443362677_4V80BwZqd7j9QbFDPX1nAl3yp6cs
8	64144983	66375244	52	-1.3653	http://genome.ucsc.edu/cgi-bin/hgTracks?db=hg19&position=chr8:64094983-66425244&hgsid=443362677_4V80BwZqd7j9QbFDPX1nAl3yp6cs
8	66418440	73073621	262	-0.7291	http://genome.ucsc.edu/cgi-bin/hgTracks?db=hg19&position=chr8:66368440-73123621&hgsid=443362677_4V80BwZqd7j9QbFDPX1nAl3yp6cs
8	73083745	73910982	17	-1.6237	http://genome.ucsc.edu/cgi-bin/hgTracks?db=hg19&position=chr8:73033745-73960982&hgsid=443362677_4V80BwZqd7j9QbFDPX1nAl3yp6cs
8	73919577	74890849	72	-0.501	http://genome.ucsc.edu/cgi-bin/hgTracks?db=hg19&position=chr8:73869577-74940849&hgsid=443362677_4V80BwZqd7j9QbFDPX1nAl3yp6cs
8	74900313	74988651	5	-1.9821	http://genome.ucsc.edu/cgi-bin/hgTracks?db=hg19&position=chr8:74850313-75038651&hgsid=443362677_4V80BwZqd7j9QbFDPX1nAl3yp6cs
8	75028336	75364277	14	-0.5388	http://genome.ucsc.edu/cgi-bin/hgTracks?db=hg19&position=chr8:74978336-75414277&hgsid=443362677_4V80BwZqd7j9QbFDPX1nAl3yp6cs
8	75464691	76307043	18	-1.5868	http://genome.ucsc.edu/cgi-bin/hgTracks?db=hg19&position=chr8:75414691-76357043&hgsid=443362677_4V80BwZqd7j9QbFDPX1nAl3yp6cs
8	76331055	76611888	12	-0.009	http://genome.ucsc.edu/cgi-bin/hgTracks?db=hg19&position=chr8:76281055-76661888&hgsid=443362677_4V80BwZqd7j9QbFDPX1nAl3yp6cs
8	76635682	87848298	293	-1.0231	http://genome.ucsc.edu/cgi-bin/hgTracks?db=hg19&position=chr8:76585682-87898298&hgsid=443362677_4V80BwZqd7j9QbFDPX1nAl3yp6cs
8	87885422	89601342	43	-1.7715	http://genome.ucsc.edu/cgi-bin/hgTracks?db=hg19&position=chr8:87835422-89651342&hgsid=443362677_4V80BwZqd7j9QbFDPX1nAl3yp6cs
8	89630992	94699595	111	-0.9768	http://genome.ucsc.edu/cgi-bin/hgTracks?db=hg19&position=chr8:89580992-94749595&hgsid=443362677_4V80BwZqd7j9QbFDPX1nAl3yp6cs
8	94763140	96331230	110	-0.4054	http://genome.ucsc.edu/cgi-bin/hgTracks?db=hg19&position=chr8:94713140-96381230&hgsid=443362677_4V80BwZqd7j9QbFDPX1nAl3yp6cs
8	96360961	97192206	23	-1.6974	http://genome.ucsc.edu/cgi-bin/hgTracks?db=hg19&position=chr8:96310961-97242206&hgsid=443362677_4V80BwZqd7j9QbFDPX1nAl3yp6cs
8	97209654	97353816	11	-0.1558	http://genome.ucsc.edu/cgi-bin/hgTracks?db=hg19&position=chr8:97159654-97403816&hgsid=443362677_4V80BwZqd7j9QbFDPX1nAl3yp6cs
8	97404961	98646651	33	-1.45	http://genome.ucsc.edu/cgi-bin/hgTracks?db=hg19&position=chr8:97354961-98696651&hgsid=443362677_4V80BwZqd7j9QbFDPX1nAl3yp6cs
8	98649292	112406346	551	-0.7373	http://genome.ucsc.edu/cgi-bin/hgTracks?db=hg19&position=chr8:98599292-112456346&hgsid=443362677_4V80BwZqd7j9QbFDPX1nAl3yp6cs
8	112437174	117631832	135	-1.5652	http://genome.ucsc.edu/cgi-bin/hgTracks?db=hg19&position=chr8:112387174-117681832&hgsid=443362677_4V80BwZqd7j9QbFDPX1nAl3yp6cs
8	117662978	146297866	1089	-0.686	http://genome.ucsc.edu/cgi-bin/hgTracks?db=hg19&position=chr8:117612978-146347866&hgsid=443362677_4V80BwZqd7j9QbFDPX1nAl3yp6cs
9	119529	1313875	81	-0.3782	http://genome.ucsc.edu/cgi-bin/hgTracks?db=hg19&position=chr9:69529-1363875&hgsid=443362677_4V80BwZqd7j9QbFDPX1nAl3yp6cs
9	1322320	2010212	21	-1.3195	http://genome.ucsc.edu/cgi-bin/hgTracks?db=hg19&position=chr9:1272320-2060212&hgsid=443362677_4V80BwZqd7j9QbFDPX1nAl3yp6cs
9	2034169	7067888	227	-0.4089	http://genome.ucsc.edu/cgi-bin/hgTracks?db=hg19&position=chr9:1984169-7117888&hgsid=443362677_4V80BwZqd7j9QbFDPX1nAl3yp6cs
9	7302082	14029524	151	-1.0277	http://genome.ucsc.edu/cgi-bin/hgTracks?db=hg19&position=chr9:7252082-14079524&hgsid=443362677_4V80BwZqd7j9QbFDPX1nAl3yp6cs
9	14100637	15609190	87	-0.2542	http://genome.ucsc.edu/cgi-bin/hgTracks?db=hg19&position=chr9:14050637-15659190&hgsid=443362677_4V80BwZqd7j9QbFDPX1nAl3yp6cs
9	15651199	26825236	329	-0.8627	http://genome.ucsc.edu/cgi-bin/hgTracks?db=hg19&position=chr9:15601199-26875236&hgsid=443362677_4V80BwZqd7j9QbFDPX1nAl3yp6cs
9	26847305	27738947	45	-0.2201	http://genome.ucsc.edu/cgi-bin/hgTracks?db=hg19&position=chr9:26797305-27788947&hgsid=443362677_4V80BwZqd7j9QbFDPX1nAl3yp6cs
9	27794124	32019072	89	-1.1195	http://genome.ucsc.edu/cgi-bin/hgTracks?db=hg19&position=chr9:27744124-32069072&hgsid=443362677_4V80BwZqd7j9QbFDPX1nAl3yp6cs
9	32060569	47266171	693	-0.4094	http://genome.ucsc.edu/cgi-bin/hgTracks?db=hg19&position=chr9:32010569-47316171&hgsid=443362677_4V80BwZqd7j9QbFDPX1nAl3yp6cs
9	65525248	73013497	172	-0.301	http://genome.ucsc.edu/cgi-bin/hgTracks?db=hg19&position=chr9:65475248-73063497&hgsid=443362677_4V80BwZqd7j9QbFDPX1nAl3yp6cs
9	73038748	74239487	39	-0.9502	http://genome.ucsc.edu/cgi-bin/hgTracks?db=hg19&position=chr9:72988748-74289487&hgsid=443362677_4V80BwZqd7j9QbFDPX1nAl3yp6cs
9	74240324	75619406	108	-0.1428	http://genome.ucsc.edu/cgi-bin/hgTracks?db=hg19&position=chr9:74190324-75669406&hgsid=443362677_4V80BwZqd7j9QbFDPX1nAl3yp6cs
9	75643131	77334809	33	-0.8801	http://genome.ucsc.edu/cgi-bin/hgTracks?db=hg19&position=chr9:75593131-77384809&hgsid=443362677_4V80BwZqd7j9QbFDPX1nAl3yp6cs
9	77341350	79465057	106	-0.1298	http://genome.ucsc.edu/cgi-bin/hgTracks?db=hg19&position=chr9:77291350-79515057&hgsid=443362677_4V80BwZqd7j9QbFDPX1nAl3yp6cs
9	79466388	79773322	26	-0.619	http://genome.ucsc.edu/cgi-bin/hgTracks?db=hg19&position=chr9:79416388-79823322&hgsid=443362677_4V80BwZqd7j9QbFDPX1nAl3yp6cs
9	79781019	81107935	70	0.0399	http://genome.ucsc.edu/cgi-bin/hgTracks?db=hg19&position=chr9:79731019-81157935&hgsid=443362677_4V80BwZqd7j9QbFDPX1nAl3yp6cs
9	81113765	84125400	85	-0.9252	http://genome.ucsc.edu/cgi-bin/hgTracks?db=hg19&position=chr9:81063765-84175400&hgsid=443362677_4V80BwZqd7j9QbFDPX1nAl3yp6cs
9	84129822	84349280	31	-0.0972	http://genome.ucsc.edu/cgi-bin/hgTracks?db=hg19&position=chr9:84079822-84399280&hgsid=443362677_4V80BwZqd7j9QbFDPX1nAl3yp6cs
9	84362290	85304025	64	-0.8665	http://genome.ucsc.edu/cgi-bin/hgTracks?db=hg19&position=chr9:84312290-85354025&hgsid=443362677_4V80BwZqd7j9QbFDPX1nAl3yp6cs
9	85360290	88874977	184	-0.2288	http://genome.ucsc.edu/cgi-bin/hgTracks?db=hg19&position=chr9:85310290-88924977&hgsid=443362677_4V80BwZqd7j9QbFDPX1nAl3yp6cs
9	88917624	90012035	47	-0.8589	http://genome.ucsc.edu/cgi-bin/hgTracks?db=hg19&position=chr9:88867624-90062035&hgsid=443362677_4V80BwZqd7j9QbFDPX1nAl3yp6cs
9	90023531	90593414	29	-0.1243	http://genome.ucsc.edu/cgi-bin/hgTracks?db=hg19&position=chr9:89973531-90643414&hgsid=443362677_4V80BwZqd7j9QbFDPX1nAl3yp6cs
9	90599945	90718414	14	-0.8148	http://genome.ucsc.edu/cgi-bin/hgTracks?db=hg19&position=chr9:90549945-90768414&hgsid=443362677_4V80BwZqd7j9QbFDPX1nAl3yp6cs
9	90754009	104222490	721	-0.2984	http://genome.ucsc.edu/cgi-bin/hgTracks?db=hg19&position=chr9:90704009-104272490&hgsid=443362677_4V80BwZqd7j9QbFDPX1nAl3yp6cs
9	104226116	107395548	71	-0.9268	http://genome.ucsc.edu/cgi-bin/hgTracks?db=hg19&position=chr9:104176116-107445548&hgsid=443362677_4V80BwZqd7j9QbFDPX1nAl3yp6cs
9	107401194	108641061	78	-0.4322	http://genome.ucsc.edu/cgi-bin/hgTracks?db=hg19&position=chr9:107351194-108691061&hgsid=443362677_4V80BwZqd7j9QbFDPX1nAl3yp6cs
9	108665642	109986160	30	-0.906	http://genome.ucsc.edu/cgi-bin/hgTracks?db=hg19&position=chr9:108615642-110036160&hgsid=443362677_4V80BwZqd7j9QbFDPX1nAl3yp6cs
9	110031268	119629753	459	-0.2836	http://genome.ucsc.edu/cgi-bin/hgTracks?db=hg19&position=chr9:109981268-119679753&hgsid=443362677_4V80BwZqd7j9QbFDPX1nAl3yp6cs
9	119664228	122357191	67	-0.8056	http://genome.ucsc.edu/cgi-bin/hgTracks?db=hg19&position=chr9:119614228-122407191&hgsid=443362677_4V80BwZqd7j9QbFDPX1nAl3yp6cs
9	122360566	122967380	16	-1.5286	http://genome.ucsc.edu/cgi-bin/hgTracks?db=hg19&position=chr9:122310566-123017380&hgsid=443362677_4V80BwZqd7j9QbFDPX1nAl3yp6cs
9	123034039	141067511	1444	-0.299	http://genome.ucsc.edu/cgi-bin/hgTracks?db=hg19&position=chr9:122984039-141117511&hgsid=443362677_4V80BwZqd7j9QbFDPX1nAl3yp6cs
10	77523	35871273	1919	-0.3575	http://genome.ucsc.edu/cgi-bin/hgTracks?db=hg19&position=chr10:27523-35921273&hgsid=443362677_4V80BwZqd7j9QbFDPX1nAl3yp6cs
10	35895066	37085248	70	-1.065	http://genome.ucsc.edu/cgi-bin/hgTracks?db=hg19&position=chr10:35845066-37135248&hgsid=443362677_4V80BwZqd7j9QbFDPX1nAl3yp6cs
10	37095651	39060663	84	-0.5218	http://genome.ucsc.edu/cgi-bin/hgTracks?db=hg19&position=chr10:37045651-39110663&hgsid=443362677_4V80BwZqd7j9QbFDPX1nAl3yp6cs
10	42700411	65545481	656	-0.4524	http://genome.ucsc.edu/cgi-bin/hgTracks?db=hg19&position=chr10:42650411-65595481&hgsid=443362677_4V80BwZqd7j9QbFDPX1nAl3yp6cs
10	65555888	69578506	108	-0.8711	http://genome.ucsc.edu/cgi-bin/hgTracks?db=hg19&position=chr10:65505888-69628506&hgsid=443362677_4V80BwZqd7j9QbFDPX1nAl3yp6cs
10	69579015	82873619	836	-0.2395	http://genome.ucsc.edu/cgi-bin/hgTracks?db=hg19&position=chr10:69529015-82923619&hgsid=443362677_4V80BwZqd7j9QbFDPX1nAl3yp6cs
10	82874199	85592069	70	-1.0514	http://genome.ucsc.edu/cgi-bin/hgTracks?db=hg19&position=chr10:82824199-85642069&hgsid=443362677_4V80BwZqd7j9QbFDPX1nAl3yp6cs
10	85601611	86687060	42	-0.3879	http://genome.ucsc.edu/cgi-bin/hgTracks?db=hg19&position=chr10:85551611-86737060&hgsid=443362677_4V80BwZqd7j9QbFDPX1nAl3yp6cs
10	86742047	87918743	26	-1.118	http://genome.ucsc.edu/cgi-bin/hgTracks?db=hg19&position=chr10:86692047-87968743&hgsid=443362677_4V80BwZqd7j9QbFDPX1nAl3yp6cs
10	87935559	89745445	114	-0.2124	http://genome.ucsc.edu/cgi-bin/hgTracks?db=hg19&position=chr10:87885559-89795445&hgsid=443362677_4V80BwZqd7j9QbFDPX1nAl3yp6cs
10	89752267	93554456	77	-0.663	http://genome.ucsc.edu/cgi-bin/hgTracks?db=hg19&position=chr10:89702267-93604456&hgsid=443362677_4V80BwZqd7j9QbFDPX1nAl3yp6cs
10	93567677	100316894	448	-0.2297	http://genome.ucsc.edu/cgi-bin/hgTracks?db=hg19&position=chr10:93517677-100366894&hgsid=443362677_4V80BwZqd7j9QbFDPX1nAl3yp6cs
10	100322396	101268932	31	-1.0498	http://genome.ucsc.edu/cgi-bin/hgTracks?db=hg19&position=chr10:100272396-101318932&hgsid=443362677_4V80BwZqd7j9QbFDPX1nAl3yp6cs
10	101335907	106098759	418	-0.2514	http://genome.ucsc.edu/cgi-bin/hgTracks?db=hg19&position=chr10:101285907-106148759&hgsid=443362677_4V80BwZqd7j9QbFDPX1nAl3yp6cs
10	106164460	111293341	142	-0.9695	http://genome.ucsc.edu/cgi-bin/hgTracks?db=hg19&position=chr10:106114460-111343341&hgsid=443362677_4V80BwZqd7j9QbFDPX1nAl3yp6cs
10	111487901	116756818	225	-0.2373	http://genome.ucsc.edu/cgi-bin/hgTracks?db=hg19&position=chr10:111437901-116806818&hgsid=443362677_4V80BwZqd7j9QbFDPX1nAl3yp6cs
10	116776126	118288118	56	-1.0618	http://genome.ucsc.edu/cgi-bin/hgTracks?db=hg19&position=chr10:116726126-118338118&hgsid=443362677_4V80BwZqd7j9QbFDPX1nAl3yp6cs
10	118303414	135450221	686	-0.3213	http://genome.ucsc.edu/cgi-bin/hgTracks?db=hg19&position=chr10:118253414-135500221&hgsid=443362677_4V80BwZqd7j9QbFDPX1nAl3yp6cs
11	162894	6627327	325	-0.2795	http://genome.ucsc.edu/cgi-bin/hgTracks?db=hg19&position=chr11:112894-6677327&hgsid=443362677_4V80BwZqd7j9QbFDPX1nAl3yp6cs
11	6705707	8555746	52	-1.1467	http://genome.ucsc.edu/cgi-bin/hgTracks?db=hg19&position=chr11:6655707-8605746&hgsid=443362677_4V80BwZqd7j9QbFDPX1nAl3yp6cs
11	8568854	11013744	205	-0.1809	http://genome.ucsc.edu/cgi-bin/hgTracks?db=hg19&position=chr11:8518854-11063744&hgsid=443362677_4V80BwZqd7j9QbFDPX1nAl3yp6cs
11	11034619	11748157	13	-1.2489	http://genome.ucsc.edu/cgi-bin/hgTracks?db=hg19&position=chr11:10984619-11798157&hgsid=443362677_4V80BwZqd7j9QbFDPX1nAl3yp6cs
11	11807293	20171225	298	-0.1572	http://genome.ucsc.edu/cgi-bin/hgTracks?db=hg19&position=chr11:11757293-20221225&hgsid=443362677_4V80BwZqd7j9QbFDPX1nAl3yp6cs
11	20204193	26874078	153	-0.8701	http://genome.ucsc.edu/cgi-bin/hgTracks?db=hg19&position=chr11:20154193-26924078&hgsid=443362677_4V80BwZqd7j9QbFDPX1nAl3yp6cs
11	26894817	28375396	46	-0.2694	http://genome.ucsc.edu/cgi-bin/hgTracks?db=hg19&position=chr11:26844817-28425396&hgsid=443362677_4V80BwZqd7j9QbFDPX1nAl3yp6cs
11	28617739	32583240	117	-0.9215	http://genome.ucsc.edu/cgi-bin/hgTracks?db=hg19&position=chr11:28567739-32633240&hgsid=443362677_4V80BwZqd7j9QbFDPX1nAl3yp6cs
11	32591770	37224054	194	-0.3481	http://genome.ucsc.edu/cgi-bin/hgTracks?db=hg19&position=chr11:32541770-37274054&hgsid=443362677_4V80BwZqd7j9QbFDPX1nAl3yp6cs
11	37384626	43301254	174	-0.9149	http://genome.ucsc.edu/cgi-bin/hgTracks?db=hg19&position=chr11:37334626-43351254&hgsid=443362677_4V80BwZqd7j9QbFDPX1nAl3yp6cs
11	43305456	45355849	74	-0.3362	http://genome.ucsc.edu/cgi-bin/hgTracks?db=hg19&position=chr11:43255456-45405849&hgsid=443362677_4V80BwZqd7j9QbFDPX1nAl3yp6cs
11	45358650	45769153	13	-1.2226	http://genome.ucsc.edu/cgi-bin/hgTracks?db=hg19&position=chr11:45308650-45819153&hgsid=443362677_4V80BwZqd7j9QbFDPX1nAl3yp6cs
11	45787929	47881076	261	-0.2074	http://genome.ucsc.edu/cgi-bin/hgTracks?db=hg19&position=chr11:45737929-47931076&hgsid=443362677_4V80BwZqd7j9QbFDPX1nAl3yp6cs
11	47887939	51476568	100	-0.6583	http://genome.ucsc.edu/cgi-bin/hgTracks?db=hg19&position=chr11:47837939-51526568&hgsid=443362677_4V80BwZqd7j9QbFDPX1nAl3yp6cs
11	55078389	57422201	70	-0.7571	http://genome.ucsc.edu/cgi-bin/hgTracks?db=hg19&position=chr11:55028389-57472201&hgsid=443362677_4V80BwZqd7j9QbFDPX1nAl3yp6cs
11	57430960	96156735	2033	-0.2973	http://genome.ucsc.edu/cgi-bin/hgTracks?db=hg19&position=chr11:57380960-96206735&hgsid=443362677_4V80BwZqd7j9QbFDPX1nAl3yp6cs
11	96219901	99862123	112	-1.0279	http://genome.ucsc.edu/cgi-bin/hgTracks?db=hg19&position=chr11:96169901-99912123&hgsid=443362677_4V80BwZqd7j9QbFDPX1nAl3yp6cs
11	99980082	100679229	26	-0.2327	http://genome.ucsc.edu/cgi-bin/hgTracks?db=hg19&position=chr11:99930082-100729229&hgsid=443362677_4V80BwZqd7j9QbFDPX1nAl3yp6cs
11	100873896	101586859	17	-1.1823	http://genome.ucsc.edu/cgi-bin/hgTracks?db=hg19&position=chr11:100823896-101636859&hgsid=443362677_4V80BwZqd7j9QbFDPX1nAl3yp6cs
11	101590751	134939114	1361	-0.5262	http://genome.ucsc.edu/cgi-bin/hgTracks?db=hg19&position=chr11:101540751-134989114&hgsid=443362677_4V80BwZqd7j9QbFDPX1nAl3yp6cs
12	164714	8670466	618	-0.3496	http://genome.ucsc.edu/cgi-bin/hgTracks?db=hg19&position=chr12:114714-8720466&hgsid=443362677_4V80BwZqd7j9QbFDPX1nAl3yp6cs
12	8694063	8905072	21	-1.1766	http://genome.ucsc.edu/cgi-bin/hgTracks?db=hg19&position=chr12:8644063-8955072&hgsid=443362677_4V80BwZqd7j9QbFDPX1nAl3yp6cs
12	8922661	16338824	355	-0.2614	http://genome.ucsc.edu/cgi-bin/hgTracks?db=hg19&position=chr12:8872661-16388824&hgsid=443362677_4V80BwZqd7j9QbFDPX1nAl3yp6cs
12	16357315	18868428	68	-0.7552	http://genome.ucsc.edu/cgi-bin/hgTracks?db=hg19&position=chr12:16307315-18918428&hgsid=443362677_4V80BwZqd7j9QbFDPX1nAl3yp6cs
12	18953673	19153549	4	0.1038	http://genome.ucsc.edu/cgi-bin/hgTracks?db=hg19&position=chr12:18903673-19203549&hgsid=443362677_4V80BwZqd7j9QbFDPX1nAl3yp6cs
12	19154498	19231379	6	-0.6457	http://genome.ucsc.edu/cgi-bin/hgTracks?db=hg19&position=chr12:19104498-19281379&hgsid=443362677_4V80BwZqd7j9QbFDPX1nAl3yp6cs
12	19243112	19993094	68	-0.1264	http://genome.ucsc.edu/cgi-bin/hgTracks?db=hg19&position=chr12:19193112-20043094&hgsid=443362677_4V80BwZqd7j9QbFDPX1nAl3yp6cs
12	20055714	26258478	213	-0.9428	http://genome.ucsc.edu/cgi-bin/hgTracks?db=hg19&position=chr12:20005714-26308478&hgsid=443362677_4V80BwZqd7j9QbFDPX1nAl3yp6cs
12	26264337	33090667	396	-0.271	http://genome.ucsc.edu/cgi-bin/hgTracks?db=hg19&position=chr12:26214337-33140667&hgsid=443362677_4V80BwZqd7j9QbFDPX1nAl3yp6cs
12	33101935	34409543	36	-0.9192	http://genome.ucsc.edu/cgi-bin/hgTracks?db=hg19&position=chr12:33051935-34459543&hgsid=443362677_4V80BwZqd7j9QbFDPX1nAl3yp6cs
12	37908243	45585659	233	-0.6579	http://genome.ucsc.edu/cgi-bin/hgTracks?db=hg19&position=chr12:37858243-45635659&hgsid=443362677_4V80BwZqd7j9QbFDPX1nAl3yp6cs
12	45587626	54702885	748	-0.2176	http://genome.ucsc.edu/cgi-bin/hgTracks?db=hg19&position=chr12:45537626-54752885&hgsid=443362677_4V80BwZqd7j9QbFDPX1nAl3yp6cs
12	54710601	56039859	50	-0.8824	http://genome.ucsc.edu/cgi-bin/hgTracks?db=hg19&position=chr12:54660601-56089859&hgsid=443362677_4V80BwZqd7j9QbFDPX1nAl3yp6cs
12	56047444	61491135	342	-0.2811	http://genome.ucsc.edu/cgi-bin/hgTracks?db=hg19&position=chr12:55997444-61541135&hgsid=443362677_4V80BwZqd7j9QbFDPX1nAl3yp6cs
12	61565580	62614809	25	-1.242	http://genome.ucsc.edu/cgi-bin/hgTracks?db=hg19&position=chr12:61515580-62664809&hgsid=443362677_4V80BwZqd7j9QbFDPX1nAl3yp6cs
12	62630138	72362987	419	-0.3174	http://genome.ucsc.edu/cgi-bin/hgTracks?db=hg19&position=chr12:62580138-72412987&hgsid=443362677_4V80BwZqd7j9QbFDPX1nAl3yp6cs
12	72381556	74877720	40	-1.2864	http://genome.ucsc.edu/cgi-bin/hgTracks?db=hg19&position=chr12:72331556-74927720&hgsid=443362677_4V80BwZqd7j9QbFDPX1nAl3yp6cs
12	74930555	96808153	793	-0.4135	http://genome.ucsc.edu/cgi-bin/hgTracks?db=hg19&position=chr12:74880555-96858153&hgsid=443362677_4V80BwZqd7j9QbFDPX1nAl3yp6cs
12	96829514	98836820	72	-0.8967	http://genome.ucsc.edu/cgi-bin/hgTracks?db=hg19&position=chr12:96779514-98886820&hgsid=443362677_4V80BwZqd7j9QbFDPX1nAl3yp6cs
12	98853470	103649755	242	-0.4836	http://genome.ucsc.edu/cgi-bin/hgTracks?db=hg19&position=chr12:98803470-103699755&hgsid=443362677_4V80BwZqd7j9QbFDPX1nAl3yp6cs
12	103671490	103789206	4	-2.3638	http://genome.ucsc.edu/cgi-bin/hgTracks?db=hg19&position=chr12:103621490-103839206&hgsid=443362677_4V80BwZqd7j9QbFDPX1nAl3yp6cs
12	103793239	112935881	604	-0.3619	http://genome.ucsc.edu/cgi-bin/hgTracks?db=hg19&position=chr12:103743239-112985881&hgsid=443362677_4V80BwZqd7j9QbFDPX1nAl3yp6cs
12	112958869	113519058	23	-1.0157	http://genome.ucsc.edu/cgi-bin/hgTracks?db=hg19&position=chr12:112908869-113569058&hgsid=443362677_4V80BwZqd7j9QbFDPX1nAl3yp6cs
12	113541335	118882388	312	-0.2687	http://genome.ucsc.edu/cgi-bin/hgTracks?db=hg19&position=chr12:113491335-118932388&hgsid=443362677_4V80BwZqd7j9QbFDPX1nAl3yp6cs
12	118890579	120023946	55	-0.808	http://genome.ucsc.edu/cgi-bin/hgTracks?db=hg19&position=chr12:118840579-120073946&hgsid=443362677_4V80BwZqd7j9QbFDPX1nAl3yp6cs
12	120034389	125727945	748	-0.23	http://genome.ucsc.edu/cgi-bin/hgTracks?db=hg19&position=chr12:119984389-125777945&hgsid=443362677_4V80BwZqd7j9QbFDPX1nAl3yp6cs
12	125757941	131240576	251	-0.7838	http://genome.ucsc.edu/cgi-bin/hgTracks?db=hg19&position=chr12:125707941-131290576&hgsid=443362677_4V80BwZqd7j9QbFDPX1nAl3yp6cs
12	131275995	133813968	192	-0.36	http://genome.ucsc.edu/cgi-bin/hgTracks?db=hg19&position=chr12:131225995-133863968&hgsid=443362677_4V80BwZqd7j9QbFDPX1nAl3yp6cs
13	19138503	23327446	287	-0.8227	http://genome.ucsc.edu/cgi-bin/hgTracks?db=hg19&position=chr13:19088503-23377446&hgsid=443362677_4V80BwZqd7j9QbFDPX1nAl3yp6cs
13	23333774	24072343	65	-1.7271	http://genome.ucsc.edu/cgi-bin/hgTracks?db=hg19&position=chr13:23283774-24122343&hgsid=443362677_4V80BwZqd7j9QbFDPX1nAl3yp6cs
13	24081867	53327321	1273	-0.8973	http://genome.ucsc.edu/cgi-bin/hgTracks?db=hg19&position=chr13:24031867-53377321&hgsid=443362677_4V80BwZqd7j9QbFDPX1nAl3yp6cs
13	53351843	60130463	184	-1.6696	http://genome.ucsc.edu/cgi-bin/hgTracks?db=hg19&position=chr13:53301843-60180463&hgsid=443362677_4V80BwZqd7j9QbFDPX1nAl3yp6cs
13	60244809	61155906	32	-0.4391	http://genome.ucsc.edu/cgi-bin/hgTracks?db=hg19&position=chr13:60194809-61205906&hgsid=443362677_4V80BwZqd7j9QbFDPX1nAl3yp6cs
13	61164753	71968142	286	-1.7377	http://genome.ucsc.edu/cgi-bin/hgTracks?db=hg19&position=chr13:61114753-72018142&hgsid=443362677_4V80BwZqd7j9QbFDPX1nAl3yp6cs
13	71987338	72390141	16	-0.2188	http://genome.ucsc.edu/cgi-bin/hgTracks?db=hg19&position=chr13:71937338-72440141&hgsid=443362677_4V80BwZqd7j9QbFDPX1nAl3yp6cs
13	72462303	73242221	15	-1.5987	http://genome.ucsc.edu/cgi-bin/hgTracks?db=hg19&position=chr13:72412303-73292221&hgsid=443362677_4V80BwZqd7j9QbFDPX1nAl3yp6cs
13	73294950	81013220	278	-0.8056	http://genome.ucsc.edu/cgi-bin/hgTracks?db=hg19&position=chr13:73244950-81063220&hgsid=443362677_4V80BwZqd7j9QbFDPX1nAl3yp6cs
13	81029642	95218798	395	-1.7193	http://genome.ucsc.edu/cgi-bin/hgTracks?db=hg19&position=chr13:80979642-95268798&hgsid=443362677_4V80BwZqd7j9QbFDPX1nAl3yp6cs
13	95241661	96636792	69	-0.8776	http://genome.ucsc.edu/cgi-bin/hgTracks?db=hg19&position=chr13:95191661-96686792&hgsid=443362677_4V80BwZqd7j9QbFDPX1nAl3yp6cs
13	96644341	97460044	22	-1.8365	http://genome.ucsc.edu/cgi-bin/hgTracks?db=hg19&position=chr13:96594341-97510044&hgsid=443362677_4V80BwZqd7j9QbFDPX1nAl3yp6cs
13	97484133	98114141	20	-0.4078	http://genome.ucsc.edu/cgi-bin/hgTracks?db=hg19&position=chr13:97434133-98164141&hgsid=443362677_4V80BwZqd7j9QbFDPX1nAl3yp6cs
13	98121480	98608310	21	-1.4861	http://genome.ucsc.edu/cgi-bin/hgTracks?db=hg19&position=chr13:98071480-98658310&hgsid=443362677_4V80BwZqd7j9QbFDPX1nAl3yp6cs
13	98611912	101297161	195	-0.6539	http://genome.ucsc.edu/cgi-bin/hgTracks?db=hg19&position=chr13:98561912-101347161&hgsid=443362677_4V80BwZqd7j9QbFDPX1nAl3yp6cs
13	101307368	103097782	47	-1.703	http://genome.ucsc.edu/cgi-bin/hgTracks?db=hg19&position=chr13:101257368-103147782&hgsid=443362677_4V80BwZqd7j9QbFDPX1nAl3yp6cs
13	103102841	103526964	22	-0.5679	http://genome.ucsc.edu/cgi-bin/hgTracks?db=hg19&position=chr13:103052841-103576964&hgsid=443362677_4V80BwZqd7j9QbFDPX1nAl3yp6cs
13	103604951	106088754	56	-1.6531	http://genome.ucsc.edu/cgi-bin/hgTracks?db=hg19&position=chr13:103554951-106138754&hgsid=443362677_4V80BwZqd7j9QbFDPX1nAl3yp6cs
13	106097438	107201189	35	-0.4518	http://genome.ucsc.edu/cgi-bin/hgTracks?db=hg19&position=chr13:106047438-107251189&hgsid=443362677_4V80BwZqd7j9QbFDPX1nAl3yp6cs
13	107345606	109902971	79	-1.4165	http://genome.ucsc.edu/cgi-bin/hgTracks?db=hg19&position=chr13:107295606-109952971&hgsid=443362677_4V80BwZqd7j9QbFDPX1nAl3yp6cs
13	109915177	110541064	22	-0.4449	http://genome.ucsc.edu/cgi-bin/hgTracks?db=hg19&position=chr13:109865177-110591064&hgsid=443362677_4V80BwZqd7j9QbFDPX1nAl3yp6cs
13	110569034	111028101	10	-2.0869	http://genome.ucsc.edu/cgi-bin/hgTracks?db=hg19&position=chr13:110519034-111078101&hgsid=443362677_4V80BwZqd7j9QbFDPX1nAl3yp6cs
13	111036055	115098018	141	-0.8411	http://genome.ucsc.edu/cgi-bin/hgTracks?db=hg19&position=chr13:110986055-115148018&hgsid=443362677_4V80BwZqd7j9QbFDPX1nAl3yp6cs
14	19073224	25772203	363	-0.1312	http://genome.ucsc.edu/cgi-bin/hgTracks?db=hg19&position=chr14:19023224-25822203&hgsid=443362677_4V80BwZqd7j9QbFDPX1nAl3yp6cs
14	25773800	31027211	125	-0.6591	http://genome.ucsc.edu/cgi-bin/hgTracks?db=hg19&position=chr14:25723800-31077211&hgsid=443362677_4V80BwZqd7j9QbFDPX1nAl3yp6cs
14	31050832	38232182	431	-0.1676	http://genome.ucsc.edu/cgi-bin/hgTracks?db=hg19&position=chr14:31000832-38282182&hgsid=443362677_4V80BwZqd7j9QbFDPX1nAl3yp6cs
14	38245348	39409622	32	-0.7384	http://genome.ucsc.edu/cgi-bin/hgTracks?db=hg19&position=chr14:38195348-39459622&hgsid=443362677_4V80BwZqd7j9QbFDPX1nAl3yp6cs
14	39482183	39912380	48	-0.0738	http://genome.ucsc.edu/cgi-bin/hgTracks?db=hg19&position=chr14:39432183-39962380&hgsid=443362677_4V80BwZqd7j9QbFDPX1nAl3yp6cs
14	39930956	49997577	220	-0.7185	http://genome.ucsc.edu/cgi-bin/hgTracks?db=hg19&position=chr14:39880956-50047577&hgsid=443362677_4V80BwZqd7j9QbFDPX1nAl3yp6cs
14	50027546	62412498	587	-0.2765	http://genome.ucsc.edu/cgi-bin/hgTracks?db=hg19&position=chr14:49977546-62462498&hgsid=443362677_4V80BwZqd7j9QbFDPX1nAl3yp6cs
14	62446524	63824112	36	-0.9097	http://genome.ucsc.edu/cgi-bin/hgTracks?db=hg19&position=chr14:62396524-63874112&hgsid=443362677_4V80BwZqd7j9QbFDPX1nAl3yp6cs
14	63843775	72227768	479	-0.1473	http://genome.ucsc.edu/cgi-bin/hgTracks?db=hg19&position=chr14:63793775-72277768&hgsid=443362677_4V80BwZqd7j9QbFDPX1nAl3yp6cs
14	72230523	72332365	8	-1.054	http://genome.ucsc.edu/cgi-bin/hgTracks?db=hg19&position=chr14:72180523-72382365&hgsid=443362677_4V80BwZqd7j9QbFDPX1nAl3yp6cs
14	72384822	72856898	8	-0.3023	http://genome.ucsc.edu/cgi-bin/hgTracks?db=hg19&position=chr14:72334822-72906898&hgsid=443362677_4V80BwZqd7j9QbFDPX1nAl3yp6cs
14	72873016	73197798	13	-1.0824	http://genome.ucsc.edu/cgi-bin/hgTracks?db=hg19&position=chr14:72823016-73247798&hgsid=443362677_4V80BwZqd7j9QbFDPX1nAl3yp6cs
14	73231289	76888646	334	-0.1861	http://genome.ucsc.edu/cgi-bin/hgTracks?db=hg19&position=chr14:73181289-76938646&hgsid=443362677_4V80BwZqd7j9QbFDPX1nAl3yp6cs
14	76899111	77209128	22	-0.857	http://genome.ucsc.edu/cgi-bin/hgTracks?db=hg19&position=chr14:76849111-77259128&hgsid=443362677_4V80BwZqd7j9QbFDPX1nAl3yp6cs
14	77256130	78438008	111	-0.1369	http://genome.ucsc.edu/cgi-bin/hgTracks?db=hg19&position=chr14:77206130-78488008&hgsid=443362677_4V80BwZqd7j9QbFDPX1nAl3yp6cs
14	78452745	79659206	34	-0.9535	http://genome.ucsc.edu/cgi-bin/hgTracks?db=hg19&position=chr14:78402745-79709206&hgsid=443362677_4V80BwZqd7j9QbFDPX1nAl3yp6cs
14	79735485	81442348	51	-0.3805	http://genome.ucsc.edu/cgi-bin/hgTracks?db=hg19&position=chr14:79685485-81492348&hgsid=443362677_4V80BwZqd7j9QbFDPX1nAl3yp6cs
14	81451518	81617365	11	-1.11	http://genome.ucsc.edu/cgi-bin/hgTracks?db=hg19&position=chr14:81401518-81667365&hgsid=443362677_4V80BwZqd7j9QbFDPX1nAl3yp6cs
14	81640934	81991142	21	-0.0715	http://genome.ucsc.edu/cgi-bin/hgTracks?db=hg19&position=chr14:81590934-82041142&hgsid=443362677_4V80BwZqd7j9QbFDPX1nAl3yp6cs
14	82005427	88372809	175	-1.0336	http://genome.ucsc.edu/cgi-bin/hgTracks?db=hg19&position=chr14:81955427-88422809&hgsid=443362677_4V80BwZqd7j9QbFDPX1nAl3yp6cs
14	88393690	93732192	360	-0.2379	http://genome.ucsc.edu/cgi-bin/hgTracks?db=hg19&position=chr14:88343690-93782192&hgsid=443362677_4V80BwZqd7j9QbFDPX1nAl3yp6cs
14	93738552	96437542	111	-0.756	http://genome.ucsc.edu/cgi-bin/hgTracks?db=hg19&position=chr14:93688552-96487542&hgsid=443362677_4V80BwZqd7j9QbFDPX1nAl3yp6cs
14	96514955	96964828	28	-0.0026	http://genome.ucsc.edu/cgi-bin/hgTracks?db=hg19&position=chr14:96464955-97014828&hgsid=443362677_4V80BwZqd7j9QbFDPX1nAl3yp6cs
14	96972333	100561302	107	-0.6753	http://genome.ucsc.edu/cgi-bin/hgTracks?db=hg19&position=chr14:96922333-100611302&hgsid=443362677_4V80BwZqd7j9QbFDPX1nAl3yp6cs
14	100628607	107287357	480	-0.1977	http://genome.ucsc.edu/cgi-bin/hgTracks?db=hg19&position=chr14:100578607-107337357&hgsid=443362677_4V80BwZqd7j9QbFDPX1nAl3yp6cs
15	20046528	22677040	54	-0.7253	http://genome.ucsc.edu/cgi-bin/hgTracks?db=hg19&position=chr15:19996528-22727040&hgsid=443362677_4V80BwZqd7j9QbFDPX1nAl3yp6cs
15	22682734	23695985	95	-0.1226	http://genome.ucsc.edu/cgi-bin/hgTracks?db=hg19&position=chr15:22632734-23745985&hgsid=443362677_4V80BwZqd7j9QbFDPX1nAl3yp6cs
15	23699220	28295631	200	-0.7865	http://genome.ucsc.edu/cgi-bin/hgTracks?db=hg19&position=chr15:23649220-28345631&hgsid=443362677_4V80BwZqd7j9QbFDPX1nAl3yp6cs
15	28318484	29077053	50	-0.1858	http://genome.ucsc.edu/cgi-bin/hgTracks?db=hg19&position=chr15:28268484-29127053&hgsid=443362677_4V80BwZqd7j9QbFDPX1nAl3yp6cs
15	29100914	29926087	59	-0.703	http://genome.ucsc.edu/cgi-bin/hgTracks?db=hg19&position=chr15:29050914-29976087&hgsid=443362677_4V80BwZqd7j9QbFDPX1nAl3yp6cs
15	29958150	33455247	175	-0.1851	http://genome.ucsc.edu/cgi-bin/hgTracks?db=hg19&position=chr15:29908150-33505247&hgsid=443362677_4V80BwZqd7j9QbFDPX1nAl3yp6cs
15	33457684	34135445	34	-0.5449	http://genome.ucsc.edu/cgi-bin/hgTracks?db=hg19&position=chr15:33407684-34185445&hgsid=443362677_4V80BwZqd7j9QbFDPX1nAl3yp6cs
15	34141129	45812560	825	-0.1868	http://genome.ucsc.edu/cgi-bin/hgTracks?db=hg19&position=chr15:34091129-45862560&hgsid=443362677_4V80BwZqd7j9QbFDPX1nAl3yp6cs
15	45816172	48547559	76	-0.8979	http://genome.ucsc.edu/cgi-bin/hgTracks?db=hg19&position=chr15:45766172-48597559&hgsid=443362677_4V80BwZqd7j9QbFDPX1nAl3yp6cs
15	48550482	52584028	237	-0.3168	http://genome.ucsc.edu/cgi-bin/hgTracks?db=hg19&position=chr15:48500482-52634028&hgsid=443362677_4V80BwZqd7j9QbFDPX1nAl3yp6cs
15	52627637	56109914	162	-0.6667	http://genome.ucsc.edu/cgi-bin/hgTracks?db=hg19&position=chr15:52577637-56159914&hgsid=443362677_4V80BwZqd7j9QbFDPX1nAl3yp6cs
15	56116828	59822682	168	-0.2078	http://genome.ucsc.edu/cgi-bin/hgTracks?db=hg19&position=chr15:56066828-59872682&hgsid=443362677_4V80BwZqd7j9QbFDPX1nAl3yp6cs
15	59846817	60591090	41	-0.7554	http://genome.ucsc.edu/cgi-bin/hgTracks?db=hg19&position=chr15:59796817-60641090&hgsid=443362677_4V80BwZqd7j9QbFDPX1nAl3yp6cs
15	60615314	60775214	16	-0.0808	http://genome.ucsc.edu/cgi-bin/hgTracks?db=hg19&position=chr15:60565314-60825214&hgsid=443362677_4V80BwZqd7j9QbFDPX1nAl3yp6cs
15	60790182	61944084	34	-1.2324	http://genome.ucsc.edu/cgi-bin/hgTracks?db=hg19&position=chr15:60740182-61994084&hgsid=443362677_4V80BwZqd7j9QbFDPX1nAl3yp6cs
15	61967645	83761748	1315	-0.308	http://genome.ucsc.edu/cgi-bin/hgTracks?db=hg19&position=chr15:61917645-83811748&hgsid=443362677_4V80BwZqd7j9QbFDPX1nAl3yp6cs
15	83774088	85135527	63	-1.1041	http://genome.ucsc.edu/cgi-bin/hgTracks?db=hg19&position=chr15:83724088-85185527&hgsid=443362677_4V80BwZqd7j9QbFDPX1nAl3yp6cs
15	85145277	86394409	99	-0.229	http://genome.ucsc.edu/cgi-bin/hgTracks?db=hg19&position=chr15:85095277-86444409&hgsid=443362677_4V80BwZqd7j9QbFDPX1nAl3yp6cs
15	86418146	89585970	98	-0.9078	http://genome.ucsc.edu/cgi-bin/hgTracks?db=hg19&position=chr15:86368146-89635970&hgsid=443362677_4V80BwZqd7j9QbFDPX1nAl3yp6cs
15	89596291	93942065	336	-0.3092	http://genome.ucsc.edu/cgi-bin/hgTracks?db=hg19&position=chr15:89546291-93992065&hgsid=443362677_4V80BwZqd7j9QbFDPX1nAl3yp6cs
15	93951909	94561643	31	-1.0563	http://genome.ucsc.edu/cgi-bin/hgTracks?db=hg19&position=chr15:93901909-94611643&hgsid=443362677_4V80BwZqd7j9QbFDPX1nAl3yp6cs
15	94563019	95103344	17	-0.2311	http://genome.ucsc.edu/cgi-bin/hgTracks?db=hg19&position=chr15:94513019-95153344&hgsid=443362677_4V80BwZqd7j9QbFDPX1nAl3yp6cs
15	95139665	97762742	82	-1.1074	http://genome.ucsc.edu/cgi-bin/hgTracks?db=hg19&position=chr15:95089665-97812742&hgsid=443362677_4V80BwZqd7j9QbFDPX1nAl3yp6cs
15	97912195	98734615	32	-0.1084	http://genome.ucsc.edu/cgi-bin/hgTracks?db=hg19&position=chr15:97862195-98784615&hgsid=443362677_4V80BwZqd7j9QbFDPX1nAl3yp6cs
15	98769128	99174534	25	-0.9367	http://genome.ucsc.edu/cgi-bin/hgTracks?db=hg19&position=chr15:98719128-99224534&hgsid=443362677_4V80BwZqd7j9QbFDPX1nAl3yp6cs
15	99178715	102471473	154	-0.3051	http://genome.ucsc.edu/cgi-bin/hgTracks?db=hg19&position=chr15:99128715-102521473&hgsid=443362677_4V80BwZqd7j9QbFDPX1nAl3yp6cs
16	72304	5000692	593	-0.2974	http://genome.ucsc.edu/cgi-bin/hgTracks?db=hg19&position=chr16:22304-5050692&hgsid=443362677_4V80BwZqd7j9QbFDPX1nAl3yp6cs
16	5004202	6542494	92	-0.8447	http://genome.ucsc.edu/cgi-bin/hgTracks?db=hg19&position=chr16:4954202-6592494&hgsid=443362677_4V80BwZqd7j9QbFDPX1nAl3yp6cs
16	6569626	6708334	10	0.0967	http://genome.ucsc.edu/cgi-bin/hgTracks?db=hg19&position=chr16:6519626-6758334&hgsid=443362677_4V80BwZqd7j9QbFDPX1nAl3yp6cs
16	6730356	8204037	72	-1.1848	http://genome.ucsc.edu/cgi-bin/hgTracks?db=hg19&position=chr16:6680356-8254037&hgsid=443362677_4V80BwZqd7j9QbFDPX1nAl3yp6cs
16	8218776	9242035	79	-0.3728	http://genome.ucsc.edu/cgi-bin/hgTracks?db=hg19&position=chr16:8168776-9292035&hgsid=443362677_4V80BwZqd7j9QbFDPX1nAl3yp6cs
16	9245417	10452563	66	-0.9647	http://genome.ucsc.edu/cgi-bin/hgTracks?db=hg19&position=chr16:9195417-10502563&hgsid=443362677_4V80BwZqd7j9QbFDPX1nAl3yp6cs
16	10459964	12919287	209	-0.3576	http://genome.ucsc.edu/cgi-bin/hgTracks?db=hg19&position=chr16:10409964-12969287&hgsid=443362677_4V80BwZqd7j9QbFDPX1nAl3yp6cs
16	12924416	14055833	61	-0.9846	http://genome.ucsc.edu/cgi-bin/hgTracks?db=hg19&position=chr16:12874416-14105833&hgsid=443362677_4V80BwZqd7j9QbFDPX1nAl3yp6cs
16	14056847	14430731	25	-0.1059	http://genome.ucsc.edu/cgi-bin/hgTracks?db=hg19&position=chr16:14006847-14480731&hgsid=443362677_4V80BwZqd7j9QbFDPX1nAl3yp6cs
16	14439192	14507133	15	-1.0106	http://genome.ucsc.edu/cgi-bin/hgTracks?db=hg19&position=chr16:14389192-14557133&hgsid=443362677_4V80BwZqd7j9QbFDPX1nAl3yp6cs
16	14519574	16918322	177	-0.2434	http://genome.ucsc.edu/cgi-bin/hgTracks?db=hg19&position=chr16:14469574-16968322&hgsid=443362677_4V80BwZqd7j9QbFDPX1nAl3yp6cs
16	16930463	17224422	22	-0.9936	http://genome.ucsc.edu/cgi-bin/hgTracks?db=hg19&position=chr16:16880463-17274422&hgsid=443362677_4V80BwZqd7j9QbFDPX1nAl3yp6cs
16	17302674	17633477	30	-0.1757	http://genome.ucsc.edu/cgi-bin/hgTracks?db=hg19&position=chr16:17252674-17683477&hgsid=443362677_4V80BwZqd7j9QbFDPX1nAl3yp6cs
16	17649948	18146234	31	-0.9686	http://genome.ucsc.edu/cgi-bin/hgTracks?db=hg19&position=chr16:17599948-18196234&hgsid=443362677_4V80BwZqd7j9QbFDPX1nAl3yp6cs
16	18214291	19879313	138	-0.2989	http://genome.ucsc.edu/cgi-bin/hgTracks?db=hg19&position=chr16:18164291-19929313&hgsid=443362677_4V80BwZqd7j9QbFDPX1nAl3yp6cs
16	19917985	20716619	35	-0.9904	http://genome.ucsc.edu/cgi-bin/hgTracks?db=hg19&position=chr16:19867985-20766619&hgsid=443362677_4V80BwZqd7j9QbFDPX1nAl3yp6cs
16	20763436	23857855	209	-0.3246	http://genome.ucsc.edu/cgi-bin/hgTracks?db=hg19&position=chr16:20713436-23907855&hgsid=443362677_4V80BwZqd7j9QbFDPX1nAl3yp6cs
16	23915908	24627571	42	-1.2395	http://genome.ucsc.edu/cgi-bin/hgTracks?db=hg19&position=chr16:23865908-24677571&hgsid=443362677_4V80BwZqd7j9QbFDPX1nAl3yp6cs
16	24636971	25288415	72	-0.4117	http://genome.ucsc.edu/cgi-bin/hgTracks?db=hg19&position=chr16:24586971-25338415&hgsid=443362677_4V80BwZqd7j9QbFDPX1nAl3yp6cs
16	25299116	26925833	59	-0.9663	http://genome.ucsc.edu/cgi-bin/hgTracks?db=hg19&position=chr16:25249116-26975833&hgsid=443362677_4V80BwZqd7j9QbFDPX1nAl3yp6cs
16	26955840	34857691	554	-0.3239	http://genome.ucsc.edu/cgi-bin/hgTracks?db=hg19&position=chr16:26905840-34907691&hgsid=443362677_4V80BwZqd7j9QbFDPX1nAl3yp6cs
16	46472193	50749419	186	-0.4175	http://genome.ucsc.edu/cgi-bin/hgTracks?db=hg19&position=chr16:46422193-50799419&hgsid=443362677_4V80BwZqd7j9QbFDPX1nAl3yp6cs
16	50768573	51683175	25	-1.1837	http://genome.ucsc.edu/cgi-bin/hgTracks?db=hg19&position=chr16:50718573-51733175&hgsid=443362677_4V80BwZqd7j9QbFDPX1nAl3yp6cs
16	51738510	54449563	97	-0.2605	http://genome.ucsc.edu/cgi-bin/hgTracks?db=hg19&position=chr16:51688510-54499563&hgsid=443362677_4V80BwZqd7j9QbFDPX1nAl3yp6cs
16	54454198	56254752	46	-0.8866	http://genome.ucsc.edu/cgi-bin/hgTracks?db=hg19&position=chr16:54404198-56304752&hgsid=443362677_4V80BwZqd7j9QbFDPX1nAl3yp6cs
16	56349895	59559905	212	-0.2354	http://genome.ucsc.edu/cgi-bin/hgTracks?db=hg19&position=chr16:56299895-59609905&hgsid=443362677_4V80BwZqd7j9QbFDPX1nAl3yp6cs
16	59569128	65436155	182	-0.959	http://genome.ucsc.edu/cgi-bin/hgTracks?db=hg19&position=chr16:59519128-65486155&hgsid=443362677_4V80BwZqd7j9QbFDPX1nAl3yp6cs
16	65446293	73015874	733	-0.1501	http://genome.ucsc.edu/cgi-bin/hgTracks?db=hg19&position=chr16:65396293-73065874&hgsid=443362677_4V80BwZqd7j9QbFDPX1nAl3yp6cs
16	73039613	74278509	69	-0.6776	http://genome.ucsc.edu/cgi-bin/hgTracks?db=hg19&position=chr16:72989613-74328509&hgsid=443362677_4V80BwZqd7j9QbFDPX1nAl3yp6cs
16	74282789	75929064	220	-0.2564	http://genome.ucsc.edu/cgi-bin/hgTracks?db=hg19&position=chr16:74232789-75979064&hgsid=443362677_4V80BwZqd7j9QbFDPX1nAl3yp6cs
16	75988649	76488104	17	-1.307	http://genome.ucsc.edu/cgi-bin/hgTracks?db=hg19&position=chr16:75938649-76538104&hgsid=443362677_4V80BwZqd7j9QbFDPX1nAl3yp6cs
16	76504471	90215975	748	-0.3288	http://genome.ucsc.edu/cgi-bin/hgTracks?db=hg19&position=chr16:76454471-90265975&hgsid=443362677_4V80BwZqd7j9QbFDPX1nAl3yp6cs
17	8759	8488254	1174	-0.0758	http://genome.ucsc.edu/cgi-bin/hgTracks?db=hg19&position=chr17:-41241-8538254&hgsid=443362677_4V80BwZqd7j9QbFDPX1nAl3yp6cs
17	8494283	8995300	44	-0.5225	http://genome.ucsc.edu/cgi-bin/hgTracks?db=hg19&position=chr17:8444283-9045300&hgsid=443362677_4V80BwZqd7j9QbFDPX1nAl3yp6cs
17	8999209	21932497	1110	-0.1802	http://genome.ucsc.edu/cgi-bin/hgTracks?db=hg19&position=chr17:8949209-21982497&hgsid=443362677_4V80BwZqd7j9QbFDPX1nAl3yp6cs
17	25344898	31332060	567	-0.2475	http://genome.ucsc.edu/cgi-bin/hgTracks?db=hg19&position=chr17:25294898-31382060&hgsid=443362677_4V80BwZqd7j9QbFDPX1nAl3yp6cs
17	31397448	33334843	36	-1.2425	http://genome.ucsc.edu/cgi-bin/hgTracks?db=hg19&position=chr17:31347448-33384843&hgsid=443362677_4V80BwZqd7j9QbFDPX1nAl3yp6cs
17	33335743	49438915	1690	-0.3091	http://genome.ucsc.edu/cgi-bin/hgTracks?db=hg19&position=chr17:33285743-49488915&hgsid=443362677_4V80BwZqd7j9QbFDPX1nAl3yp6cs
17	49463069	51466123	48	-0.8216	http://genome.ucsc.edu/cgi-bin/hgTracks?db=hg19&position=chr17:49413069-51516123&hgsid=443362677_4V80BwZqd7j9QbFDPX1nAl3yp6cs
17	51516201	52424683	27	-1.4385	http://genome.ucsc.edu/cgi-bin/hgTracks?db=hg19&position=chr17:51466201-52474683&hgsid=443362677_4V80BwZqd7j9QbFDPX1nAl3yp6cs
17	52581274	74779183	1727	-0.3289	http://genome.ucsc.edu/cgi-bin/hgTracks?db=hg19&position=chr17:52531274-74829183&hgsid=443362677_4V80BwZqd7j9QbFDPX1nAl3yp6cs
17	74791828	74996741	18	-1.1324	http://genome.ucsc.edu/cgi-bin/hgTracks?db=hg19&position=chr17:74741828-75046741&hgsid=443362677_4V80BwZqd7j9QbFDPX1nAl3yp6cs
17	75011778	81118278	543	-0.2752	http://genome.ucsc.edu/cgi-bin/hgTracks?db=hg19&position=chr17:74961778-81168278&hgsid=443362677_4V80BwZqd7j9QbFDPX1nAl3yp6cs
18	31915	15371135	824	-0.3694	http://genome.ucsc.edu/cgi-bin/hgTracks?db=hg19&position=chr18:-18085-15421135&hgsid=443362677_4V80BwZqd7j9QbFDPX1nAl3yp6cs
18	18553834	21904110	294	-0.1602	http://genome.ucsc.edu/cgi-bin/hgTracks?db=hg19&position=chr18:18503834-21954110&hgsid=443362677_4V80BwZqd7j9QbFDPX1nAl3yp6cs
18	21911453	28572055	211	-0.5919	http://genome.ucsc.edu/cgi-bin/hgTracks?db=hg19&position=chr18:21861453-28622055&hgsid=443362677_4V80BwZqd7j9QbFDPX1nAl3yp6cs
18	28655740	40606443	346	-0.2287	http://genome.ucsc.edu/cgi-bin/hgTracks?db=hg19&position=chr18:28605740-40656443&hgsid=443362677_4V80BwZqd7j9QbFDPX1nAl3yp6cs
18	40656992	42229801	29	-1.1887	http://genome.ucsc.edu/cgi-bin/hgTracks?db=hg19&position=chr18:40606992-42279801&hgsid=443362677_4V80BwZqd7j9QbFDPX1nAl3yp6cs
18	42243972	53467269	388	-0.2858	http://genome.ucsc.edu/cgi-bin/hgTracks?db=hg19&position=chr18:42193972-53517269&hgsid=443362677_4V80BwZqd7j9QbFDPX1nAl3yp6cs
18	53491756	54229500	12	-1.2068	http://genome.ucsc.edu/cgi-bin/hgTracks?db=hg19&position=chr18:53441756-54279500&hgsid=443362677_4V80BwZqd7j9QbFDPX1nAl3yp6cs
18	54266884	61157349	314	-0.216	http://genome.ucsc.edu/cgi-bin/hgTracks?db=hg19&position=chr18:54216884-61207349&hgsid=443362677_4V80BwZqd7j9QbFDPX1nAl3yp6cs
18	61184777	64097942	86	-0.6877	http://genome.ucsc.edu/cgi-bin/hgTracks?db=hg19&position=chr18:61134777-64147942&hgsid=443362677_4V80BwZqd7j9QbFDPX1nAl3yp6cs
18	64113637	65234120	37	-0.1706	http://genome.ucsc.edu/cgi-bin/hgTracks?db=hg19&position=chr18:64063637-65284120&hgsid=443362677_4V80BwZqd7j9QbFDPX1nAl3yp6cs
18	65266049	67537603	81	-0.6927	http://genome.ucsc.edu/cgi-bin/hgTracks?db=hg19&position=chr18:65216049-67587603&hgsid=443362677_4V80BwZqd7j9QbFDPX1nAl3yp6cs
18	67709704	68115723	28	0.09	http://genome.ucsc.edu/cgi-bin/hgTracks?db=hg19&position=chr18:67659704-68165723&hgsid=443362677_4V80BwZqd7j9QbFDPX1nAl3yp6cs
18	68134201	71480688	107	-0.6362	http://genome.ucsc.edu/cgi-bin/hgTracks?db=hg19&position=chr18:68084201-71530688&hgsid=443362677_4V80BwZqd7j9QbFDPX1nAl3yp6cs
18	71513603	77977184	222	-0.303	http://genome.ucsc.edu/cgi-bin/hgTracks?db=hg19&position=chr18:71463603-78027184&hgsid=443362677_4V80BwZqd7j9QbFDPX1nAl3yp6cs
19	183513	20040671	2988	-0.2967	http://genome.ucsc.edu/cgi-bin/hgTracks?db=hg19&position=chr19:133513-20090671&hgsid=443362677_4V80BwZqd7j9QbFDPX1nAl3yp6cs
19	20085058	21018523	73	-0.9726	http://genome.ucsc.edu/cgi-bin/hgTracks?db=hg19&position=chr19:20035058-21068523&hgsid=443362677_4V80BwZqd7j9QbFDPX1nAl3yp6cs
19	21021655	21655810	65	-0.2152	http://genome.ucsc.edu/cgi-bin/hgTracks?db=hg19&position=chr19:20971655-21705810&hgsid=443362677_4V80BwZqd7j9QbFDPX1nAl3yp6cs
19	21665369	23380602	148	-0.9571	http://genome.ucsc.edu/cgi-bin/hgTracks?db=hg19&position=chr19:21615369-23430602&hgsid=443362677_4V80BwZqd7j9QbFDPX1nAl3yp6cs
19	23384730	24494920	91	-0.2965	http://genome.ucsc.edu/cgi-bin/hgTracks?db=hg19&position=chr19:23334730-24544920&hgsid=443362677_4V80BwZqd7j9QbFDPX1nAl3yp6cs
19	28126214	33041369	160	-0.7515	http://genome.ucsc.edu/cgi-bin/hgTracks?db=hg19&position=chr19:28076214-33091369&hgsid=443362677_4V80BwZqd7j9QbFDPX1nAl3yp6cs
19	33042696	33198979	23	-0.1762	http://genome.ucsc.edu/cgi-bin/hgTracks?db=hg19&position=chr19:32992696-33248979&hgsid=443362677_4V80BwZqd7j9QbFDPX1nAl3yp6cs
19	33210004	33290733	10	-1.1604	http://genome.ucsc.edu/cgi-bin/hgTracks?db=hg19&position=chr19:33160004-33340733&hgsid=443362677_4V80BwZqd7j9QbFDPX1nAl3yp6cs
19	33312951	33933237	59	-0.2101	http://genome.ucsc.edu/cgi-bin/hgTracks?db=hg19&position=chr19:33262951-33983237&hgsid=443362677_4V80BwZqd7j9QbFDPX1nAl3yp6cs
19	33965514	34619183	46	-0.7581	http://genome.ucsc.edu/cgi-bin/hgTracks?db=hg19&position=chr19:33915514-34669183&hgsid=443362677_4V80BwZqd7j9QbFDPX1nAl3yp6cs
19	34627709	35754351	101	-0.1681	http://genome.ucsc.edu/cgi-bin/hgTracks?db=hg19&position=chr19:34577709-35804351&hgsid=443362677_4V80BwZqd7j9QbFDPX1nAl3yp6cs
19	35774790	35903532	11	-1.2177	http://genome.ucsc.edu/cgi-bin/hgTracks?db=hg19&position=chr19:35724790-35953532&hgsid=443362677_4V80BwZqd7j9QbFDPX1nAl3yp6cs
19	35906658	52881824	1933	-0.3093	http://genome.ucsc.edu/cgi-bin/hgTracks?db=hg19&position=chr19:35856658-52931824&hgsid=443362677_4V80BwZqd7j9QbFDPX1nAl3yp6cs
19	52889979	52921330	7	-1.9437	http://genome.ucsc.edu/cgi-bin/hgTracks?db=hg19&position=chr19:52839979-52971330&hgsid=443362677_4V80BwZqd7j9QbFDPX1nAl3yp6cs
19	52931152	56214253	455	-0.4079	http://genome.ucsc.edu/cgi-bin/hgTracks?db=hg19&position=chr19:52881152-56264253&hgsid=443362677_4V80BwZqd7j9QbFDPX1nAl3yp6cs
19	56228492	56575330	50	-0.974	http://genome.ucsc.edu/cgi-bin/hgTracks?db=hg19&position=chr19:56178492-56625330&hgsid=443362677_4V80BwZqd7j9QbFDPX1nAl3yp6cs
19	56576947	56860998	37	-0.3068	http://genome.ucsc.edu/cgi-bin/hgTracks?db=hg19&position=chr19:56526947-56910998&hgsid=443362677_4V80BwZqd7j9QbFDPX1nAl3yp6cs
19	56865075	57496607	47	-1.1946	http://genome.ucsc.edu/cgi-bin/hgTracks?db=hg19&position=chr19:56815075-57546607&hgsid=443362677_4V80BwZqd7j9QbFDPX1nAl3yp6cs
19	57505040	58421838	96	-0.3681	http://genome.ucsc.edu/cgi-bin/hgTracks?db=hg19&position=chr19:57455040-58471838&hgsid=443362677_4V80BwZqd7j9QbFDPX1nAl3yp6cs
19	58425778	58602049	32	-1.1872	http://genome.ucsc.edu/cgi-bin/hgTracks?db=hg19&position=chr19:58375778-58652049&hgsid=443362677_4V80BwZqd7j9QbFDPX1nAl3yp6cs
19	58612592	59093829	82	-0.3915	http://genome.ucsc.edu/cgi-bin/hgTracks?db=hg19&position=chr19:58562592-59143829&hgsid=443362677_4V80BwZqd7j9QbFDPX1nAl3yp6cs
20	82019	26248131	1035	-0.6042	http://genome.ucsc.edu/cgi-bin/hgTracks?db=hg19&position=chr20:32019-26298131&hgsid=443362677_4V80BwZqd7j9QbFDPX1nAl3yp6cs
20	29442630	50818491	1590	-0.5866	http://genome.ucsc.edu/cgi-bin/hgTracks?db=hg19&position=chr20:29392630-50868491&hgsid=443362677_4V80BwZqd7j9QbFDPX1nAl3yp6cs
20	50828464	51931253	27	-1.5612	http://genome.ucsc.edu/cgi-bin/hgTracks?db=hg19&position=chr20:50778464-51981253&hgsid=443362677_4V80BwZqd7j9QbFDPX1nAl3yp6cs
20	51938147	52926256	95	-0.6556	http://genome.ucsc.edu/cgi-bin/hgTracks?db=hg19&position=chr20:51888147-52976256&hgsid=443362677_4V80BwZqd7j9QbFDPX1nAl3yp6cs
20	52946930	53254585	22	-1.7233	http://genome.ucsc.edu/cgi-bin/hgTracks?db=hg19&position=chr20:52896930-53304585&hgsid=443362677_4V80BwZqd7j9QbFDPX1nAl3yp6cs
20	53261169	58564507	224	-0.7865	http://genome.ucsc.edu/cgi-bin/hgTracks?db=hg19&position=chr20:53211169-58614507&hgsid=443362677_4V80BwZqd7j9QbFDPX1nAl3yp6cs
20	58614110	60386820	35	-1.5299	http://genome.ucsc.edu/cgi-bin/hgTracks?db=hg19&position=chr20:58564110-60436820&hgsid=443362677_4V80BwZqd7j9QbFDPX1nAl3yp6cs
20	60535664	62934100	138	-0.6753	http://genome.ucsc.edu/cgi-bin/hgTracks?db=hg19&position=chr20:60485664-62984100&hgsid=443362677_4V80BwZqd7j9QbFDPX1nAl3yp6cs
21	9418291	11154720	63	-0.6643	http://genome.ucsc.edu/cgi-bin/hgTracks?db=hg19&position=chr21:9368291-11204720&hgsid=443362677_4V80BwZqd7j9QbFDPX1nAl3yp6cs
21	14383121	26865804	467	-0.9248	http://genome.ucsc.edu/cgi-bin/hgTracks?db=hg19&position=chr21:14333121-26915804&hgsid=443362677_4V80BwZqd7j9QbFDPX1nAl3yp6cs
21	26949494	27545451	41	-0.1335	http://genome.ucsc.edu/cgi-bin/hgTracks?db=hg19&position=chr21:26899494-27595451&hgsid=443362677_4V80BwZqd7j9QbFDPX1nAl3yp6cs
21	27551780	32906911	228	-0.9349	http://genome.ucsc.edu/cgi-bin/hgTracks?db=hg19&position=chr21:27501780-32956911&hgsid=443362677_4V80BwZqd7j9QbFDPX1nAl3yp6cs
21	32911671	33406651	35	-0.3081	http://genome.ucsc.edu/cgi-bin/hgTracks?db=hg19&position=chr21:32861671-33456651&hgsid=443362677_4V80BwZqd7j9QbFDPX1nAl3yp6cs
21	33418967	33608619	15	-1.3478	http://genome.ucsc.edu/cgi-bin/hgTracks?db=hg19&position=chr21:33368967-33658619&hgsid=443362677_4V80BwZqd7j9QbFDPX1nAl3yp6cs
21	33614283	34306397	37	-0.1107	http://genome.ucsc.edu/cgi-bin/hgTracks?db=hg19&position=chr21:33564283-34356397&hgsid=443362677_4V80BwZqd7j9QbFDPX1nAl3yp6cs
21	34347789	34565951	13	-1.3348	http://genome.ucsc.edu/cgi-bin/hgTracks?db=hg19&position=chr21:34297789-34615951&hgsid=443362677_4V80BwZqd7j9QbFDPX1nAl3yp6cs
21	34578624	41106274	381	-0.2546	http://genome.ucsc.edu/cgi-bin/hgTracks?db=hg19&position=chr21:34528624-41156274&hgsid=443362677_4V80BwZqd7j9QbFDPX1nAl3yp6cs
21	41110908	42488188	62	-1.0589	http://genome.ucsc.edu/cgi-bin/hgTracks?db=hg19&position=chr21:41060908-42538188&hgsid=443362677_4V80BwZqd7j9QbFDPX1nAl3yp6cs
21	42576036	46650868	214	-0.2634	http://genome.ucsc.edu/cgi-bin/hgTracks?db=hg19&position=chr21:42526036-46700868&hgsid=443362677_4V80BwZqd7j9QbFDPX1nAl3yp6cs
21	46658030	47386150	27	-0.9495	http://genome.ucsc.edu/cgi-bin/hgTracks?db=hg19&position=chr21:46608030-47436150&hgsid=443362677_4V80BwZqd7j9QbFDPX1nAl3yp6cs
21	47387878	48117364	46	-0.0637	http://genome.ucsc.edu/cgi-bin/hgTracks?db=hg19&position=chr21:47337878-48167364&hgsid=443362677_4V80BwZqd7j9QbFDPX1nAl3yp6cs
22	16080687	22680532	506	-0.249	http://genome.ucsc.edu/cgi-bin/hgTracks?db=hg19&position=chr22:16030687-22730532&hgsid=443362677_4V80BwZqd7j9QbFDPX1nAl3yp6cs
22	22729414	23020243	22	-1.1306	http://genome.ucsc.edu/cgi-bin/hgTracks?db=hg19&position=chr22:22679414-23070243&hgsid=443362677_4V80BwZqd7j9QbFDPX1nAl3yp6cs
22	23060943	27116658	285	-0.2612	http://genome.ucsc.edu/cgi-bin/hgTracks?db=hg19&position=chr22:23010943-27166658&hgsid=443362677_4V80BwZqd7j9QbFDPX1nAl3yp6cs
22	27125265	29051763	71	-0.8278	http://genome.ucsc.edu/cgi-bin/hgTracks?db=hg19&position=chr22:27075265-29101763&hgsid=443362677_4V80BwZqd7j9QbFDPX1nAl3yp6cs
22	29068249	29559458	64	-0.0324	http://genome.ucsc.edu/cgi-bin/hgTracks?db=hg19&position=chr22:29018249-29609458&hgsid=443362677_4V80BwZqd7j9QbFDPX1nAl3yp6cs
22	29560658	29576585	5	-1.5369	http://genome.ucsc.edu/cgi-bin/hgTracks?db=hg19&position=chr22:29510658-29626585&hgsid=443362677_4V80BwZqd7j9QbFDPX1nAl3yp6cs
22	29589481	32673627	343	-0.1505	http://genome.ucsc.edu/cgi-bin/hgTracks?db=hg19&position=chr22:29539481-32723627&hgsid=443362677_4V80BwZqd7j9QbFDPX1nAl3yp6cs
22	32675187	33530337	67	-0.6218	http://genome.ucsc.edu/cgi-bin/hgTracks?db=hg19&position=chr22:32625187-33580337&hgsid=443362677_4V80BwZqd7j9QbFDPX1nAl3yp6cs
22	33591833	34338948	69	-0.0865	http://genome.ucsc.edu/cgi-bin/hgTracks?db=hg19&position=chr22:33541833-34388948&hgsid=443362677_4V80BwZqd7j9QbFDPX1nAl3yp6cs
22	34351646	34607242	18	-0.6289	http://genome.ucsc.edu/cgi-bin/hgTracks?db=hg19&position=chr22:34301646-34657242&hgsid=443362677_4V80BwZqd7j9QbFDPX1nAl3yp6cs
22	34612097	34834545	8	-1.5488	http://genome.ucsc.edu/cgi-bin/hgTracks?db=hg19&position=chr22:34562097-34884545&hgsid=443362677_4V80BwZqd7j9QbFDPX1nAl3yp6cs
22	34848256	35518333	32	-0.5643	http://genome.ucsc.edu/cgi-bin/hgTracks?db=hg19&position=chr22:34798256-35568333&hgsid=443362677_4V80BwZqd7j9QbFDPX1nAl3yp6cs
22	35519120	47921821	1235	-0.1948	http://genome.ucsc.edu/cgi-bin/hgTracks?db=hg19&position=chr22:35469120-47971821&hgsid=443362677_4V80BwZqd7j9QbFDPX1nAl3yp6cs
22	47923215	49939181	90	-0.6639	http://genome.ucsc.edu/cgi-bin/hgTracks?db=hg19&position=chr22:47873215-49989181&hgsid=443362677_4V80BwZqd7j9QbFDPX1nAl3yp6cs
22	49964799	51244237	103	-0.192	http://genome.ucsc.edu/cgi-bin/hgTracks?db=hg19&position=chr22:49914799-51294237&hgsid=443362677_4V80BwZqd7j9QbFDPX1nAl3yp6cs
23	219332	3860324	84	-0.193	http://genome.ucsc.edu/cgi-bin/hgTracks?db=hg19&position=chr23:169332-3910324&hgsid=443362677_4V80BwZqd7j9QbFDPX1nAl3yp6cs
23	3902802	8681746	141	-0.7732	http://genome.ucsc.edu/cgi-bin/hgTracks?db=hg19&position=chr23:3852802-8731746&hgsid=443362677_4V80BwZqd7j9QbFDPX1nAl3yp6cs
23	8697532	20612380	564	-0.2693	http://genome.ucsc.edu/cgi-bin/hgTracks?db=hg19&position=chr23:8647532-20662380&hgsid=443362677_4V80BwZqd7j9QbFDPX1nAl3yp6cs
23	20694454	21642720	20	-0.8981	http://genome.ucsc.edu/cgi-bin/hgTracks?db=hg19&position=chr23:20644454-21692720&hgsid=443362677_4V80BwZqd7j9QbFDPX1nAl3yp6cs
23	21645541	22620383	48	-0.2548	http://genome.ucsc.edu/cgi-bin/hgTracks?db=hg19&position=chr23:21595541-22670383&hgsid=443362677_4V80BwZqd7j9QbFDPX1nAl3yp6cs
23	22626676	23211768	32	-0.9486	http://genome.ucsc.edu/cgi-bin/hgTracks?db=hg19&position=chr23:22576676-23261768&hgsid=443362677_4V80BwZqd7j9QbFDPX1nAl3yp6cs
23	23217622	58421316	1747	-0.3482	http://genome.ucsc.edu/cgi-bin/hgTracks?db=hg19&position=chr23:23167622-58471316&hgsid=443362677_4V80BwZqd7j9QbFDPX1nAl3yp6cs
23	62141982	107375222	1253	-0.349	http://genome.ucsc.edu/cgi-bin/hgTracks?db=hg19&position=chr23:62091982-107425222&hgsid=443362677_4V80BwZqd7j9QbFDPX1nAl3yp6cs
23	107483397	108208056	21	-1.0385	http://genome.ucsc.edu/cgi-bin/hgTracks?db=hg19&position=chr23:107433397-108258056&hgsid=443362677_4V80BwZqd7j9QbFDPX1nAl3yp6cs
23	108225878	112537301	122	-0.3889	http://genome.ucsc.edu/cgi-bin/hgTracks?db=hg19&position=chr23:108175878-112587301&hgsid=443362677_4V80BwZqd7j9QbFDPX1nAl3yp6cs
23	112593028	113177060	18	-1.1405	http://genome.ucsc.edu/cgi-bin/hgTracks?db=hg19&position=chr23:112543028-113227060&hgsid=443362677_4V80BwZqd7j9QbFDPX1nAl3yp6cs
23	113180262	123369166	482	-0.329	http://genome.ucsc.edu/cgi-bin/hgTracks?db=hg19&position=chr23:113130262-123419166&hgsid=443362677_4V80BwZqd7j9QbFDPX1nAl3yp6cs
23	123370968	126689842	65	-0.9371	http://genome.ucsc.edu/cgi-bin/hgTracks?db=hg19&position=chr23:123320968-126739842&hgsid=443362677_4V80BwZqd7j9QbFDPX1nAl3yp6cs
23	126704869	135083420	342	-0.2899	http://genome.ucsc.edu/cgi-bin/hgTracks?db=hg19&position=chr23:126654869-135133420&hgsid=443362677_4V80BwZqd7j9QbFDPX1nAl3yp6cs
23	135090487	135765610	30	-0.9181	http://genome.ucsc.edu/cgi-bin/hgTracks?db=hg19&position=chr23:135040487-135815610&hgsid=443362677_4V80BwZqd7j9QbFDPX1nAl3yp6cs
23	135783959	136584833	49	-0.1528	http://genome.ucsc.edu/cgi-bin/hgTracks?db=hg19&position=chr23:135733959-136634833&hgsid=443362677_4V80BwZqd7j9QbFDPX1nAl3yp6cs
23	136618961	138685918	69	-0.8699	http://genome.ucsc.edu/cgi-bin/hgTracks?db=hg19&position=chr23:136568961-138735918&hgsid=443362677_4V80BwZqd7j9QbFDPX1nAl3yp6cs
23	138688609	139020053	18	0.0315	http://genome.ucsc.edu/cgi-bin/hgTracks?db=hg19&position=chr23:138638609-139070053&hgsid=443362677_4V80BwZqd7j9QbFDPX1nAl3yp6cs
23	139047912	146384245	242	-0.7686	http://genome.ucsc.edu/cgi-bin/hgTracks?db=hg19&position=chr23:138997912-146434245&hgsid=443362677_4V80BwZqd7j9QbFDPX1nAl3yp6cs
23	146404981	154819035	253	-0.3491	http://genome.ucsc.edu/cgi-bin/hgTracks?db=hg19&position=chr23:146354981-154869035&hgsid=443362677_4V80BwZqd7j9QbFDPX1nAl3yp6cs
24	148518	10032472	127	-0.1557	http://genome.ucsc.edu/cgi-bin/hgTracks?db=hg19&position=chr24:98518-10082472&hgsid=443362677_4V80BwZqd7j9QbFDPX1nAl3yp6cs
24	13132760	59327398	163	-0.2697	http://genome.ucsc.edu/cgi-bin/hgTracks?db=hg19&position=chr24:13082760-59377398&hgsid=443362677_4V80BwZqd7j9QbFDPX1nAl3yp6cs

## Sheet: ALL TUMOR + HCT116
	TUMORS						HCT116
chrom	loc.start	loc.end	loc.start.x	loc.end.x	num.mark.x	seg.mean.x	loc.start.y	loc.end.y	num.mark.y	seg.mean.y	UCSC GB view
1	532833	4065980	532833	4065980	208	-0.2641	532833	4114512	209	-0.0355	http://genome.ucsc.edu/cgi-bin/hgTracks?db=hg19&position=chr1:482833-4115980&hgsid=443362677_4V80BwZqd7j9QbFDPX1nAl3yp6cs
1	4114512	4114512	4114512	5844486	48	-0.8386	532833	4114512	209	-0.0355	http://genome.ucsc.edu/cgi-bin/hgTracks?db=hg19&position=chr1:4064512-4164512&hgsid=443362677_4V80BwZqd7j9QbFDPX1nAl3yp6cs
1	4155254	5844486	4114512	5844486	48	-0.8386	4155254	5872263	48	-2.0938	http://genome.ucsc.edu/cgi-bin/hgTracks?db=hg19&position=chr1:4105254-5894486&hgsid=443362677_4V80BwZqd7j9QbFDPX1nAl3yp6cs
1	5872263	5872263	5872263	14453525	834	-0.2683	4155254	5872263	48	-2.0938	http://genome.ucsc.edu/cgi-bin/hgTracks?db=hg19&position=chr1:5822263-5922263&hgsid=443362677_4V80BwZqd7j9QbFDPX1nAl3yp6cs
1	5972522	14453525	5872263	14453525	834	-0.2683	5972522	14501691	834	-0.1402	http://genome.ucsc.edu/cgi-bin/hgTracks?db=hg19&position=chr1:5922522-14503525&hgsid=443362677_4V80BwZqd7j9QbFDPX1nAl3yp6cs
1	14501691	14501691	14501691	14968820	29	-0.9611	5972522	14501691	834	-0.1402	http://genome.ucsc.edu/cgi-bin/hgTracks?db=hg19&position=chr1:14451691-14551691&hgsid=443362677_4V80BwZqd7j9QbFDPX1nAl3yp6cs
1	14537808	14921564	14501691	14968820	29	-0.9611	14537808	14921564	24	-2.0142	http://genome.ucsc.edu/cgi-bin/hgTracks?db=hg19&position=chr1:14487808-14971564&hgsid=443362677_4V80BwZqd7j9QbFDPX1nAl3yp6cs
1	14936796	14968820	14501691	14968820	29	-0.9611	14936796	15217432	20	-1.1113	http://genome.ucsc.edu/cgi-bin/hgTracks?db=hg19&position=chr1:14886796-15018820&hgsid=443362677_4V80BwZqd7j9QbFDPX1nAl3yp6cs
1	15026891	15217432	15026891	36992413	1934	-0.2335	14936796	15217432	20	-1.1113	http://genome.ucsc.edu/cgi-bin/hgTracks?db=hg19&position=chr1:14976891-15267432&hgsid=443362677_4V80BwZqd7j9QbFDPX1nAl3yp6cs
1	15222643	33976835	15026891	36992413	1934	-0.2335	15222643	33976835	1695	-0.0004	http://genome.ucsc.edu/cgi-bin/hgTracks?db=hg19&position=chr1:15172643-34026835&hgsid=443362677_4V80BwZqd7j9QbFDPX1nAl3yp6cs
1	34078374	35057156	15026891	36992413	1934	-0.2335	34078374	35057156	27	-1.6522	http://genome.ucsc.edu/cgi-bin/hgTracks?db=hg19&position=chr1:34028374-35107156&hgsid=443362677_4V80BwZqd7j9QbFDPX1nAl3yp6cs
1	35063231	36992413	15026891	36992413	1934	-0.2335	35063231	37190678	207	-0.1588	http://genome.ucsc.edu/cgi-bin/hgTracks?db=hg19&position=chr1:35013231-37042413&hgsid=443362677_4V80BwZqd7j9QbFDPX1nAl3yp6cs
1	37006720	37190678	37006720	37468372	18	-1.0684	35063231	37190678	207	-0.1588	http://genome.ucsc.edu/cgi-bin/hgTracks?db=hg19&position=chr1:36956720-37240678&hgsid=443362677_4V80BwZqd7j9QbFDPX1nAl3yp6cs
1	37243799	37468372	37006720	37468372	18	-1.0684	37243799	37607640	11	-1.9761	http://genome.ucsc.edu/cgi-bin/hgTracks?db=hg19&position=chr1:37193799-37518372&hgsid=443362677_4V80BwZqd7j9QbFDPX1nAl3yp6cs
1	37476435	37607640	37476435	38504073	64	-0.1401	37243799	37607640	11	-1.9761	http://genome.ucsc.edu/cgi-bin/hgTracks?db=hg19&position=chr1:37426435-37657640&hgsid=443362677_4V80BwZqd7j9QbFDPX1nAl3yp6cs
1	37862703	38504073	37476435	38504073	64	-0.1401	37862703	38564860	62	0.0161	http://genome.ucsc.edu/cgi-bin/hgTracks?db=hg19&position=chr1:37812703-38554073&hgsid=443362677_4V80BwZqd7j9QbFDPX1nAl3yp6cs
1	38545683	38564860	38545683	39272603	26	-0.9812	37862703	38564860	62	0.0161	http://genome.ucsc.edu/cgi-bin/hgTracks?db=hg19&position=chr1:38495683-38614860&hgsid=443362677_4V80BwZqd7j9QbFDPX1nAl3yp6cs
1	38631657	38950596	38545683	39272603	26	-0.9812	38631657	38950596	12	-2.2391	http://genome.ucsc.edu/cgi-bin/hgTracks?db=hg19&position=chr1:38581657-39000596&hgsid=443362677_4V80BwZqd7j9QbFDPX1nAl3yp6cs
1	38979351	39272603	38545683	39272603	26	-0.9812	38979351	48878383	794	-0.0947	http://genome.ucsc.edu/cgi-bin/hgTracks?db=hg19&position=chr1:38929351-39322603&hgsid=443362677_4V80BwZqd7j9QbFDPX1nAl3yp6cs
1	39294605	48878383	39294605	55693742	1174	-0.2415	38979351	48878383	794	-0.0947	http://genome.ucsc.edu/cgi-bin/hgTracks?db=hg19&position=chr1:39244605-48928383&hgsid=443362677_4V80BwZqd7j9QbFDPX1nAl3yp6cs
1	48955360	50813480	39294605	55693742	1174	-0.2415	48955360	50813480	29	-1.7666	http://genome.ucsc.edu/cgi-bin/hgTracks?db=hg19&position=chr1:48905360-50863480&hgsid=443362677_4V80BwZqd7j9QbFDPX1nAl3yp6cs
1	50861515	55693742	39294605	55693742	1174	-0.2415	50861515	56433461	372	0.0204	http://genome.ucsc.edu/cgi-bin/hgTracks?db=hg19&position=chr1:50811515-55743742&hgsid=443362677_4V80BwZqd7j9QbFDPX1nAl3yp6cs
1	55703766	56433461	55703766	58798674	75	-0.8319	50861515	56433461	372	0.0204	http://genome.ucsc.edu/cgi-bin/hgTracks?db=hg19&position=chr1:55653766-56483461&hgsid=443362677_4V80BwZqd7j9QbFDPX1nAl3yp6cs
1	56437740	56814147	55703766	58798674	75	-0.8319	56437740	56814147	12	-1.4074	http://genome.ucsc.edu/cgi-bin/hgTracks?db=hg19&position=chr1:56387740-56864147&hgsid=443362677_4V80BwZqd7j9QbFDPX1nAl3yp6cs
1	56871926	57082272	55703766	58798674	75	-0.8319	56871926	57082272	10	-0.2044	http://genome.ucsc.edu/cgi-bin/hgTracks?db=hg19&position=chr1:56821926-57132272&hgsid=443362677_4V80BwZqd7j9QbFDPX1nAl3yp6cs
1	57087920	58798674	55703766	58798674	75	-0.8319	57087920	58897154	46	-1.9301	http://genome.ucsc.edu/cgi-bin/hgTracks?db=hg19&position=chr1:57037920-58848674&hgsid=443362677_4V80BwZqd7j9QbFDPX1nAl3yp6cs
1	58862661	58897154	58862661	62654580	134	-0.1505	57087920	58897154	46	-1.9301	http://genome.ucsc.edu/cgi-bin/hgTracks?db=hg19&position=chr1:58812661-58947154&hgsid=443362677_4V80BwZqd7j9QbFDPX1nAl3yp6cs
1	58916350	62654580	58862661	62654580	134	-0.1505	58916350	69377756	448	-0.0308	http://genome.ucsc.edu/cgi-bin/hgTracks?db=hg19&position=chr1:58866350-62704580&hgsid=443362677_4V80BwZqd7j9QbFDPX1nAl3yp6cs
1	62655429	62882752	62655429	62882752	24	-0.8065	58916350	69377756	448	-0.0308	http://genome.ucsc.edu/cgi-bin/hgTracks?db=hg19&position=chr1:62605429-62932752&hgsid=443362677_4V80BwZqd7j9QbFDPX1nAl3yp6cs
1	62893684	63312772	62893684	63312772	36	0.0723	58916350	69377756	448	-0.0308	http://genome.ucsc.edu/cgi-bin/hgTracks?db=hg19&position=chr1:62843684-63362772&hgsid=443362677_4V80BwZqd7j9QbFDPX1nAl3yp6cs
1	63336469	63761688	63336469	63761688	24	-1.0451	58916350	69377756	448	-0.0308	http://genome.ucsc.edu/cgi-bin/hgTracks?db=hg19&position=chr1:63286469-63811688&hgsid=443362677_4V80BwZqd7j9QbFDPX1nAl3yp6cs
1	63766223	68705111	63766223	68705111	211	-0.2412	58916350	69377756	448	-0.0308	http://genome.ucsc.edu/cgi-bin/hgTracks?db=hg19&position=chr1:63716223-68755111&hgsid=443362677_4V80BwZqd7j9QbFDPX1nAl3yp6cs
1	68707898	69377756	68707898	78016786	240	-0.7506	58916350	69377756	448	-0.0308	http://genome.ucsc.edu/cgi-bin/hgTracks?db=hg19&position=chr1:68657898-69427756&hgsid=443362677_4V80BwZqd7j9QbFDPX1nAl3yp6cs
1	69573474	70472079	68707898	78016786	240	-0.7506	69573474	70472079	24	-1.3506	http://genome.ucsc.edu/cgi-bin/hgTracks?db=hg19&position=chr1:69523474-70522079&hgsid=443362677_4V80BwZqd7j9QbFDPX1nAl3yp6cs
1	70482882	70989392	68707898	78016786	240	-0.7506	70482882	70989392	32	0.0651	http://genome.ucsc.edu/cgi-bin/hgTracks?db=hg19&position=chr1:70432882-71039392&hgsid=443362677_4V80BwZqd7j9QbFDPX1nAl3yp6cs
1	71011367	75665688	68707898	78016786	240	-0.7506	71011367	75665688	100	-1.9497	http://genome.ucsc.edu/cgi-bin/hgTracks?db=hg19&position=chr1:70961367-75715688&hgsid=443362677_4V80BwZqd7j9QbFDPX1nAl3yp6cs
1	75667159	78016786	68707898	78016786	240	-0.7506	75667159	80216940	144	-0.2101	http://genome.ucsc.edu/cgi-bin/hgTracks?db=hg19&position=chr1:75617159-78066786&hgsid=443362677_4V80BwZqd7j9QbFDPX1nAl3yp6cs
1	78020383	78719256	78020383	78719256	55	-0.1529	75667159	80216940	144	-0.2101	http://genome.ucsc.edu/cgi-bin/hgTracks?db=hg19&position=chr1:77970383-78769256&hgsid=443362677_4V80BwZqd7j9QbFDPX1nAl3yp6cs
1	78766215	80216940	78766215	83907777	119	-0.7233	75667159	80216940	144	-0.2101	http://genome.ucsc.edu/cgi-bin/hgTracks?db=hg19&position=chr1:78716215-80266940&hgsid=443362677_4V80BwZqd7j9QbFDPX1nAl3yp6cs
1	80246724	83907777	78766215	83907777	119	-0.7233	80246724	84292419	105	-1.3481	http://genome.ucsc.edu/cgi-bin/hgTracks?db=hg19&position=chr1:80196724-83957777&hgsid=443362677_4V80BwZqd7j9QbFDPX1nAl3yp6cs
1	83909123	84292419	83909123	84528830	17	-1.4004	80246724	84292419	105	-1.3481	http://genome.ucsc.edu/cgi-bin/hgTracks?db=hg19&position=chr1:83859123-84342419&hgsid=443362677_4V80BwZqd7j9QbFDPX1nAl3yp6cs
1	84337504	84528830	83909123	84528830	17	-1.4004	84337504	90542566	211	0.0311	http://genome.ucsc.edu/cgi-bin/hgTracks?db=hg19&position=chr1:84287504-84578830&hgsid=443362677_4V80BwZqd7j9QbFDPX1nAl3yp6cs
1	84714489	90542566	84714489	97448408	498	-0.3344	84337504	90542566	211	0.0311	http://genome.ucsc.edu/cgi-bin/hgTracks?db=hg19&position=chr1:84664489-90592566&hgsid=443362677_4V80BwZqd7j9QbFDPX1nAl3yp6cs
1	90552177	91158538	84714489	97448408	498	-0.3344	90552177	91158538	16	-1.7206	http://genome.ucsc.edu/cgi-bin/hgTracks?db=hg19&position=chr1:90502177-91208538&hgsid=443362677_4V80BwZqd7j9QbFDPX1nAl3yp6cs
1	91229514	97448408	84714489	97448408	498	-0.3344	91229514	101759890	405	0.0135	http://genome.ucsc.edu/cgi-bin/hgTracks?db=hg19&position=chr1:91179514-97498408&hgsid=443362677_4V80BwZqd7j9QbFDPX1nAl3yp6cs
1	97599479	101759890	97599479	108721360	293	-0.7252	91229514	101759890	405	0.0135	http://genome.ucsc.edu/cgi-bin/hgTracks?db=hg19&position=chr1:97549479-101809890&hgsid=443362677_4V80BwZqd7j9QbFDPX1nAl3yp6cs
1	101762377	108539811	97599479	108721360	293	-0.7252	101762377	108539811	163	-1.6804	http://genome.ucsc.edu/cgi-bin/hgTracks?db=hg19&position=chr1:101712377-108589811&hgsid=443362677_4V80BwZqd7j9QbFDPX1nAl3yp6cs
1	108721360	108721360	97599479	108721360	293	-0.7252	108721360	111055718	138	-0.0288	http://genome.ucsc.edu/cgi-bin/hgTracks?db=hg19&position=chr1:108671360-108771360&hgsid=443362677_4V80BwZqd7j9QbFDPX1nAl3yp6cs
1	108849480	111055718	108849480	121182415	522	-0.1918	108721360	111055718	138	-0.0288	http://genome.ucsc.edu/cgi-bin/hgTracks?db=hg19&position=chr1:108799480-111105718&hgsid=443362677_4V80BwZqd7j9QbFDPX1nAl3yp6cs
1	111184970	111522443	108849480	121182415	522	-0.1918	111184970	111522443	12	-1.4902	http://genome.ucsc.edu/cgi-bin/hgTracks?db=hg19&position=chr1:111134970-111572443&hgsid=443362677_4V80BwZqd7j9QbFDPX1nAl3yp6cs
1	111553360	112302520	108849480	121182415	522	-0.1918	111553360	112302520	36	0.0033	http://genome.ucsc.edu/cgi-bin/hgTracks?db=hg19&position=chr1:111503360-112352520&hgsid=443362677_4V80BwZqd7j9QbFDPX1nAl3yp6cs
1	112492625	112733370	108849480	121182415	522	-0.1918	112492625	112733370	6	-2.0873	http://genome.ucsc.edu/cgi-bin/hgTracks?db=hg19&position=chr1:112442625-112783370&hgsid=443362677_4V80BwZqd7j9QbFDPX1nAl3yp6cs
1	112908447	118704253	108849480	121182415	522	-0.1918	112908447	118704253	273	-0.1156	http://genome.ucsc.edu/cgi-bin/hgTracks?db=hg19&position=chr1:112858447-118754253&hgsid=443362677_4V80BwZqd7j9QbFDPX1nAl3yp6cs
1	118708361	119515314	108849480	121182415	522	-0.1918	118708361	119515314	11	-2.3725	http://genome.ucsc.edu/cgi-bin/hgTracks?db=hg19&position=chr1:118658361-119565314&hgsid=443362677_4V80BwZqd7j9QbFDPX1nAl3yp6cs
1	119558886	121182415	108849480	121182415	522	-0.1918	119558886	121182415	47	-0.2315	http://genome.ucsc.edu/cgi-bin/hgTracks?db=hg19&position=chr1:119508886-121232415&hgsid=443362677_4V80BwZqd7j9QbFDPX1nAl3yp6cs
1	142582362	143472733	142582362	154598404	676	-0.3448	142582362	143472733	28	-1.9421	http://genome.ucsc.edu/cgi-bin/hgTracks?db=hg19&position=chr1:142532362-143522733&hgsid=443362677_4V80BwZqd7j9QbFDPX1nAl3yp6cs
1	143666300	151862475	142582362	154598404	676	-0.3448	143666300	151862475	441	-0.11	http://genome.ucsc.edu/cgi-bin/hgTracks?db=hg19&position=chr1:143616300-151912475&hgsid=443362677_4V80BwZqd7j9QbFDPX1nAl3yp6cs
1	151865772	153425454	142582362	154598404	676	-0.3448	151865772	153425454	41	-1.3947	http://genome.ucsc.edu/cgi-bin/hgTracks?db=hg19&position=chr1:151815772-153475454&hgsid=443362677_4V80BwZqd7j9QbFDPX1nAl3yp6cs
1	153461892	154598404	142582362	154598404	676	-0.3448	153461892	157145465	459	0.0236	http://genome.ucsc.edu/cgi-bin/hgTracks?db=hg19&position=chr1:153411892-154648404&hgsid=443362677_4V80BwZqd7j9QbFDPX1nAl3yp6cs
1	154603413	154798448	154603413	154798448	14	-1.2266	153461892	157145465	459	0.0236	http://genome.ucsc.edu/cgi-bin/hgTracks?db=hg19&position=chr1:154553413-154848448&hgsid=443362677_4V80BwZqd7j9QbFDPX1nAl3yp6cs
1	154823547	157145465	154823547	175348239	1001	-0.4124	153461892	157145465	459	0.0236	http://genome.ucsc.edu/cgi-bin/hgTracks?db=hg19&position=chr1:154773547-157195465&hgsid=443362677_4V80BwZqd7j9QbFDPX1nAl3yp6cs
1	157199679	157931383	154823547	175348239	1001	-0.4124	157199679	157931383	21	-2.0088	http://genome.ucsc.edu/cgi-bin/hgTracks?db=hg19&position=chr1:157149679-157981383&hgsid=443362677_4V80BwZqd7j9QbFDPX1nAl3yp6cs
1	157960249	158103414	154823547	175348239	1001	-0.4124	157960249	158103414	8	0.5703	http://genome.ucsc.edu/cgi-bin/hgTracks?db=hg19&position=chr1:157910249-158153414&hgsid=443362677_4V80BwZqd7j9QbFDPX1nAl3yp6cs
1	158136836	159491714	154823547	175348239	1001	-0.4124	158136836	159491714	50	-2.223	http://genome.ucsc.edu/cgi-bin/hgTracks?db=hg19&position=chr1:158086836-159541714&hgsid=443362677_4V80BwZqd7j9QbFDPX1nAl3yp6cs
1	159525625	166232490	154823547	175348239	1001	-0.4124	159525625	166232490	294	-0.2954	http://genome.ucsc.edu/cgi-bin/hgTracks?db=hg19&position=chr1:159475625-166282490&hgsid=443362677_4V80BwZqd7j9QbFDPX1nAl3yp6cs
1	166287623	166751898	154823547	175348239	1001	-0.4124	166287623	166751898	13	-2.2488	http://genome.ucsc.edu/cgi-bin/hgTracks?db=hg19&position=chr1:166237623-166801898&hgsid=443362677_4V80BwZqd7j9QbFDPX1nAl3yp6cs
1	166793683	175348239	154823547	175348239	1001	-0.4124	166793683	175705581	344	-0.1153	http://genome.ucsc.edu/cgi-bin/hgTracks?db=hg19&position=chr1:166743683-175398239&hgsid=443362677_4V80BwZqd7j9QbFDPX1nAl3yp6cs
1	175349631	175705581	175349631	175859609	12	-1.3996	166793683	175705581	344	-0.1153	http://genome.ucsc.edu/cgi-bin/hgTracks?db=hg19&position=chr1:175299631-175755581&hgsid=443362677_4V80BwZqd7j9QbFDPX1nAl3yp6cs
1	175743564	175806740	175349631	175859609	12	-1.3996	175743564	175806740	3	-3.9905	http://genome.ucsc.edu/cgi-bin/hgTracks?db=hg19&position=chr1:175693564-175856740&hgsid=443362677_4V80BwZqd7j9QbFDPX1nAl3yp6cs
1	175859609	175859609	175349631	175859609	12	-1.3996	175859609	176190044	19	0.0501	http://genome.ucsc.edu/cgi-bin/hgTracks?db=hg19&position=chr1:175809609-175909609&hgsid=443362677_4V80BwZqd7j9QbFDPX1nAl3yp6cs
1	175876196	176173988	175876196	176173988	17	0.027	175859609	176190044	19	0.0501	http://genome.ucsc.edu/cgi-bin/hgTracks?db=hg19&position=chr1:175826196-176223988&hgsid=443362677_4V80BwZqd7j9QbFDPX1nAl3yp6cs
1	176190044	176190044	176190044	177165678	26	-1.4814	175859609	176190044	19	0.0501	http://genome.ucsc.edu/cgi-bin/hgTracks?db=hg19&position=chr1:176140044-176240044&hgsid=443362677_4V80BwZqd7j9QbFDPX1nAl3yp6cs
1	176205545	177165678	176190044	177165678	26	-1.4814	176205545	177594541	31	-1.9808	http://genome.ucsc.edu/cgi-bin/hgTracks?db=hg19&position=chr1:176155545-177215678&hgsid=443362677_4V80BwZqd7j9QbFDPX1nAl3yp6cs
1	177210200	177594541	177210200	214928645	1531	-0.5101	176205545	177594541	31	-1.9808	http://genome.ucsc.edu/cgi-bin/hgTracks?db=hg19&position=chr1:177160200-177644541&hgsid=443362677_4V80BwZqd7j9QbFDPX1nAl3yp6cs
1	177798276	181504916	177210200	214928645	1531	-0.5101	177798276	181504916	198	-0.0831	http://genome.ucsc.edu/cgi-bin/hgTracks?db=hg19&position=chr1:177748276-181554916&hgsid=443362677_4V80BwZqd7j9QbFDPX1nAl3yp6cs
1	181584419	181764669	177210200	214928645	1531	-0.5101	181584419	181764669	3	-2.6545	http://genome.ucsc.edu/cgi-bin/hgTracks?db=hg19&position=chr1:181534419-181814669&hgsid=443362677_4V80BwZqd7j9QbFDPX1nAl3yp6cs
1	181829360	208116112	177210200	214928645	1531	-0.5101	181829360	208116112	1017	0.0325	http://genome.ucsc.edu/cgi-bin/hgTracks?db=hg19&position=chr1:181779360-208166112&hgsid=443362677_4V80BwZqd7j9QbFDPX1nAl3yp6cs
1	208162721	209330055	177210200	214928645	1531	-0.5101	208162721	209330055	34	-1.948	http://genome.ucsc.edu/cgi-bin/hgTracks?db=hg19&position=chr1:208112721-209380055&hgsid=443362677_4V80BwZqd7j9QbFDPX1nAl3yp6cs
1	209367816	210583489	177210200	214928645	1531	-0.5101	209367816	210583489	39	-0.7916	http://genome.ucsc.edu/cgi-bin/hgTracks?db=hg19&position=chr1:209317816-210633489&hgsid=443362677_4V80BwZqd7j9QbFDPX1nAl3yp6cs
1	210624355	211325141	177210200	214928645	1531	-0.5101	210624355	211325141	28	-1.9172	http://genome.ucsc.edu/cgi-bin/hgTracks?db=hg19&position=chr1:210574355-211375141&hgsid=443362677_4V80BwZqd7j9QbFDPX1nAl3yp6cs
1	211363870	213483120	177210200	214928645	1531	-0.5101	211363870	213483120	166	-0.0429	http://genome.ucsc.edu/cgi-bin/hgTracks?db=hg19&position=chr1:211313870-213533120&hgsid=443362677_4V80BwZqd7j9QbFDPX1nAl3yp6cs
1	213492580	214122430	177210200	214928645	1531	-0.5101	213492580	214122430	13	-1.3264	http://genome.ucsc.edu/cgi-bin/hgTracks?db=hg19&position=chr1:213442580-214172430&hgsid=443362677_4V80BwZqd7j9QbFDPX1nAl3yp6cs
1	214357451	214928645	177210200	214928645	1531	-0.5101	214357451	215866288	44	0.1801	http://genome.ucsc.edu/cgi-bin/hgTracks?db=hg19&position=chr1:214307451-214978645&hgsid=443362677_4V80BwZqd7j9QbFDPX1nAl3yp6cs
1	214953959	215377305	214953959	215377305	6	-1.8193	214357451	215866288	44	0.1801	http://genome.ucsc.edu/cgi-bin/hgTracks?db=hg19&position=chr1:214903959-215427305&hgsid=443362677_4V80BwZqd7j9QbFDPX1nAl3yp6cs
1	215386878	215866288	215386878	216384247	23	-0.3834	214357451	215866288	44	0.1801	http://genome.ucsc.edu/cgi-bin/hgTracks?db=hg19&position=chr1:215336878-215916288&hgsid=443362677_4V80BwZqd7j9QbFDPX1nAl3yp6cs
1	215867839	216384247	215386878	216384247	23	-0.3834	215867839	217497033	40	-1.7381	http://genome.ucsc.edu/cgi-bin/hgTracks?db=hg19&position=chr1:215817839-216434247&hgsid=443362677_4V80BwZqd7j9QbFDPX1nAl3yp6cs
1	216543189	217497033	216543189	217588881	30	-1.3657	215867839	217497033	40	-1.7381	http://genome.ucsc.edu/cgi-bin/hgTracks?db=hg19&position=chr1:216493189-217547033&hgsid=443362677_4V80BwZqd7j9QbFDPX1nAl3yp6cs
1	217585904	217588881	216543189	217588881	30	-1.3657	217585904	226262771	397	-0.0815	http://genome.ucsc.edu/cgi-bin/hgTracks?db=hg19&position=chr1:217535904-217638881&hgsid=443362677_4V80BwZqd7j9QbFDPX1nAl3yp6cs
1	217631496	226262771	217631496	233922135	794	-0.4256	217585904	226262771	397	-0.0815	http://genome.ucsc.edu/cgi-bin/hgTracks?db=hg19&position=chr1:217581496-226312771&hgsid=443362677_4V80BwZqd7j9QbFDPX1nAl3yp6cs
1	226263915	226265351	217631496	233922135	794	-0.4256	226263915	226265351	3	3.2387	http://genome.ucsc.edu/cgi-bin/hgTracks?db=hg19&position=chr1:226213915-226315351&hgsid=443362677_4V80BwZqd7j9QbFDPX1nAl3yp6cs
1	226267133	233922135	217631496	233922135	794	-0.4256	226267133	237109139	643	-0.0774	http://genome.ucsc.edu/cgi-bin/hgTracks?db=hg19&position=chr1:226217133-233972135&hgsid=443362677_4V80BwZqd7j9QbFDPX1nAl3yp6cs
1	233969799	234525339	233969799	234525339	23	-1.3151	226267133	237109139	643	-0.0774	http://genome.ucsc.edu/cgi-bin/hgTracks?db=hg19&position=chr1:233919799-234575339&hgsid=443362677_4V80BwZqd7j9QbFDPX1nAl3yp6cs
1	234528549	236768607	234528549	236768607	203	-0.3549	226267133	237109139	643	-0.0774	http://genome.ucsc.edu/cgi-bin/hgTracks?db=hg19&position=chr1:234478549-236818607&hgsid=443362677_4V80BwZqd7j9QbFDPX1nAl3yp6cs
1	236777020	237109139	236777020	239334825	115	-0.9331	226267133	237109139	643	-0.0774	http://genome.ucsc.edu/cgi-bin/hgTracks?db=hg19&position=chr1:236727020-237159139&hgsid=443362677_4V80BwZqd7j9QbFDPX1nAl3yp6cs
1	237122879	239334825	236777020	239334825	115	-0.9331	237122879	241547738	235	-1.961	http://genome.ucsc.edu/cgi-bin/hgTracks?db=hg19&position=chr1:237072879-239384825&hgsid=443362677_4V80BwZqd7j9QbFDPX1nAl3yp6cs
1	239340935	240111914	239340935	240111914	46	0	237122879	241547738	235	-1.961	http://genome.ucsc.edu/cgi-bin/hgTracks?db=hg19&position=chr1:239290935-240161914&hgsid=443362677_4V80BwZqd7j9QbFDPX1nAl3yp6cs
1	240168672	240856176	240168672	240856176	55	-1.236	237122879	241547738	235	-1.961	http://genome.ucsc.edu/cgi-bin/hgTracks?db=hg19&position=chr1:240118672-240906176&hgsid=443362677_4V80BwZqd7j9QbFDPX1nAl3yp6cs
1	240864598	241547738	240864598	242184252	90	-0.5111	237122879	241547738	235	-1.961	http://genome.ucsc.edu/cgi-bin/hgTracks?db=hg19&position=chr1:240814598-241597738&hgsid=443362677_4V80BwZqd7j9QbFDPX1nAl3yp6cs
1	241552423	242184252	240864598	242184252	90	-0.5111	241552423	242203578	56	-0.3176	http://genome.ucsc.edu/cgi-bin/hgTracks?db=hg19&position=chr1:241502423-242234252&hgsid=443362677_4V80BwZqd7j9QbFDPX1nAl3yp6cs
1	242186858	242203578	242186858	242986189	53	-1.0627	241552423	242203578	56	-0.3176	http://genome.ucsc.edu/cgi-bin/hgTracks?db=hg19&position=chr1:242136858-242253578&hgsid=443362677_4V80BwZqd7j9QbFDPX1nAl3yp6cs
1	242204200	242986189	242186858	242986189	53	-1.0627	242204200	243239429	65	-1.714	http://genome.ucsc.edu/cgi-bin/hgTracks?db=hg19&position=chr1:242154200-243036189&hgsid=443362677_4V80BwZqd7j9QbFDPX1nAl3yp6cs
1	243022875	243239429	243022875	243642184	45	-0.3493	242204200	243239429	65	-1.714	http://genome.ucsc.edu/cgi-bin/hgTracks?db=hg19&position=chr1:242972875-243289429&hgsid=443362677_4V80BwZqd7j9QbFDPX1nAl3yp6cs
1	243254435	243642184	243022875	243642184	45	-0.3493	243254435	243672060	28	-0.2001	http://genome.ucsc.edu/cgi-bin/hgTracks?db=hg19&position=chr1:243204435-243692184&hgsid=443362677_4V80BwZqd7j9QbFDPX1nAl3yp6cs
1	243672060	243672060	243672060	244195618	24	-1.3956	243254435	243672060	28	-0.2001	http://genome.ucsc.edu/cgi-bin/hgTracks?db=hg19&position=chr1:243622060-243722060&hgsid=443362677_4V80BwZqd7j9QbFDPX1nAl3yp6cs
1	243679203	244195618	243672060	244195618	24	-1.3956	243679203	244195618	23	-1.9738	http://genome.ucsc.edu/cgi-bin/hgTracks?db=hg19&position=chr1:243629203-244245618&hgsid=443362677_4V80BwZqd7j9QbFDPX1nAl3yp6cs
1	244242867	247349849	244242867	247349849	254	-0.319	244242867	247581696	272	-0.2451	http://genome.ucsc.edu/cgi-bin/hgTracks?db=hg19&position=chr1:244192867-247399849&hgsid=443362677_4V80BwZqd7j9QbFDPX1nAl3yp6cs
1	247389814	247581696	247389814	249237754	63	-0.9092	244242867	247581696	272	-0.2451	http://genome.ucsc.edu/cgi-bin/hgTracks?db=hg19&position=chr1:247339814-247631696&hgsid=443362677_4V80BwZqd7j9QbFDPX1nAl3yp6cs
1	247582549	249090969	247389814	249237754	63	-0.9092	247582549	249090969	38	-1.8952	http://genome.ucsc.edu/cgi-bin/hgTracks?db=hg19&position=chr1:247532549-249140969&hgsid=443362677_4V80BwZqd7j9QbFDPX1nAl3yp6cs
1	249112471	249237754	247389814	249237754	63	-0.9092	249112471	249237754	7	0.0217	http://genome.ucsc.edu/cgi-bin/hgTracks?db=hg19&position=chr1:249062471-249287754&hgsid=443362677_4V80BwZqd7j9QbFDPX1nAl3yp6cs
2	38125	3766768	38125	3766768	75	-0.5669	38125	3927926	77	-0.7067	http://genome.ucsc.edu/cgi-bin/hgTracks?db=hg19&position=chr2:-11875-3816768&hgsid=443362677_4V80BwZqd7j9QbFDPX1nAl3yp6cs
2	3884376	3927926	3884376	6297383	67	-1.1714	38125	3927926	77	-0.7067	http://genome.ucsc.edu/cgi-bin/hgTracks?db=hg19&position=chr2:3834376-3977926&hgsid=443362677_4V80BwZqd7j9QbFDPX1nAl3yp6cs
2	3952845	6297383	3884376	6297383	67	-1.1714	3952845	7931516	105	-1.9427	http://genome.ucsc.edu/cgi-bin/hgTracks?db=hg19&position=chr2:3902845-6347383&hgsid=443362677_4V80BwZqd7j9QbFDPX1nAl3yp6cs
2	6340038	7931516	6340038	21023504	531	-0.4344	3952845	7931516	105	-1.9427	http://genome.ucsc.edu/cgi-bin/hgTracks?db=hg19&position=chr2:6290038-7981516&hgsid=443362677_4V80BwZqd7j9QbFDPX1nAl3yp6cs
2	7980806	13002186	6340038	21023504	531	-0.4344	7980806	13002186	294	-0.0582	http://genome.ucsc.edu/cgi-bin/hgTracks?db=hg19&position=chr2:7930806-13052186&hgsid=443362677_4V80BwZqd7j9QbFDPX1nAl3yp6cs
2	13014526	15042348	6340038	21023504	531	-0.4344	13014526	15042348	43	-1.7481	http://genome.ucsc.edu/cgi-bin/hgTracks?db=hg19&position=chr2:12964526-15092348&hgsid=443362677_4V80BwZqd7j9QbFDPX1nAl3yp6cs
2	15045097	16447965	6340038	21023504	531	-0.4344	15045097	16447965	46	-0.5659	http://genome.ucsc.edu/cgi-bin/hgTracks?db=hg19&position=chr2:14995097-16497965&hgsid=443362677_4V80BwZqd7j9QbFDPX1nAl3yp6cs
2	16465573	17475436	6340038	21023504	531	-0.4344	16465573	17475436	16	-2.1178	http://genome.ucsc.edu/cgi-bin/hgTracks?db=hg19&position=chr2:16415573-17525436&hgsid=443362677_4V80BwZqd7j9QbFDPX1nAl3yp6cs
2	17507380	18080417	6340038	21023504	531	-0.4344	17507380	18080417	16	-0.0824	http://genome.ucsc.edu/cgi-bin/hgTracks?db=hg19&position=chr2:17457380-18130417&hgsid=443362677_4V80BwZqd7j9QbFDPX1nAl3yp6cs
2	18139210	19521306	6340038	21023504	531	-0.4344	18139210	19521306	27	-1.1414	http://genome.ucsc.edu/cgi-bin/hgTracks?db=hg19&position=chr2:18089210-19571306&hgsid=443362677_4V80BwZqd7j9QbFDPX1nAl3yp6cs
2	19664012	21023504	6340038	21023504	531	-0.4344	19664012	21207837	54	-0.0728	http://genome.ucsc.edu/cgi-bin/hgTracks?db=hg19&position=chr2:19614012-21073504&hgsid=443362677_4V80BwZqd7j9QbFDPX1nAl3yp6cs
2	21033721	21207837	21033721	23026190	55	-1.0543	19664012	21207837	54	-0.0728	http://genome.ucsc.edu/cgi-bin/hgTracks?db=hg19&position=chr2:20983721-21257837&hgsid=443362677_4V80BwZqd7j9QbFDPX1nAl3yp6cs
2	21239780	23026190	21033721	23026190	55	-1.0543	21239780	23481647	58	-2.1218	http://genome.ucsc.edu/cgi-bin/hgTracks?db=hg19&position=chr2:21189780-23076190&hgsid=443362677_4V80BwZqd7j9QbFDPX1nAl3yp6cs
2	23061989	23481647	23061989	29418525	507	-0.299	21239780	23481647	58	-2.1218	http://genome.ucsc.edu/cgi-bin/hgTracks?db=hg19&position=chr2:23011989-23531647&hgsid=443362677_4V80BwZqd7j9QbFDPX1nAl3yp6cs
2	23535645	29418525	23061989	29418525	507	-0.299	23535645	29433391	501	-0.0323	http://genome.ucsc.edu/cgi-bin/hgTracks?db=hg19&position=chr2:23485645-29468525&hgsid=443362677_4V80BwZqd7j9QbFDPX1nAl3yp6cs
2	29432332	29433391	29432332	30434433	33	-1.0897	23535645	29433391	501	-0.0323	http://genome.ucsc.edu/cgi-bin/hgTracks?db=hg19&position=chr2:29382332-29483391&hgsid=443362677_4V80BwZqd7j9QbFDPX1nAl3yp6cs
2	29525308	30318997	29432332	30434433	33	-1.0897	29525308	30318997	24	-1.673	http://genome.ucsc.edu/cgi-bin/hgTracks?db=hg19&position=chr2:29475308-30368997&hgsid=443362677_4V80BwZqd7j9QbFDPX1nAl3yp6cs
2	30329019	30434433	29432332	30434433	33	-1.0897	30329019	30898086	40	-0.1617	http://genome.ucsc.edu/cgi-bin/hgTracks?db=hg19&position=chr2:30279019-30484433&hgsid=443362677_4V80BwZqd7j9QbFDPX1nAl3yp6cs
2	30437340	30898086	30437340	33825509	223	-0.3166	30329019	30898086	40	-0.1617	http://genome.ucsc.edu/cgi-bin/hgTracks?db=hg19&position=chr2:30387340-30948086&hgsid=443362677_4V80BwZqd7j9QbFDPX1nAl3yp6cs
2	30983041	32017050	30437340	33825509	223	-0.3166	30983041	32017050	21	-1.5565	http://genome.ucsc.edu/cgi-bin/hgTracks?db=hg19&position=chr2:30933041-32067050&hgsid=443362677_4V80BwZqd7j9QbFDPX1nAl3yp6cs
2	32062715	33825509	30437340	33825509	223	-0.3166	32062715	34012779	182	-0.1787	http://genome.ucsc.edu/cgi-bin/hgTracks?db=hg19&position=chr2:32012715-33875509&hgsid=443362677_4V80BwZqd7j9QbFDPX1nAl3yp6cs
2	33830999	34012779	33830999	36569535	101	-1.0788	32062715	34012779	182	-0.1787	http://genome.ucsc.edu/cgi-bin/hgTracks?db=hg19&position=chr2:33780999-34062779&hgsid=443362677_4V80BwZqd7j9QbFDPX1nAl3yp6cs
2	34026979	36446927	33830999	36569535	101	-1.0788	34026979	36446927	86	-1.9816	http://genome.ucsc.edu/cgi-bin/hgTracks?db=hg19&position=chr2:33976979-36496927&hgsid=443362677_4V80BwZqd7j9QbFDPX1nAl3yp6cs
2	36560274	36569535	33830999	36569535	101	-1.0788	36560274	40068340	214	0.0135	http://genome.ucsc.edu/cgi-bin/hgTracks?db=hg19&position=chr2:36510274-36619535&hgsid=443362677_4V80BwZqd7j9QbFDPX1nAl3yp6cs
2	36794829	39834457	36794829	39834457	204	-0.2591	36560274	40068340	214	0.0135	http://genome.ucsc.edu/cgi-bin/hgTracks?db=hg19&position=chr2:36744829-39884457&hgsid=443362677_4V80BwZqd7j9QbFDPX1nAl3yp6cs
2	39873882	40068340	39873882	42051799	40	-1.0321	36560274	40068340	214	0.0135	http://genome.ucsc.edu/cgi-bin/hgTracks?db=hg19&position=chr2:39823882-40118340&hgsid=443362677_4V80BwZqd7j9QbFDPX1nAl3yp6cs
2	40075513	40361324	39873882	42051799	40	-1.0321	40075513	40361324	6	-2.3733	http://genome.ucsc.edu/cgi-bin/hgTracks?db=hg19&position=chr2:40025513-40411324&hgsid=443362677_4V80BwZqd7j9QbFDPX1nAl3yp6cs
2	40439517	41092944	39873882	42051799	40	-1.0321	40439517	41092944	10	-0.5286	http://genome.ucsc.edu/cgi-bin/hgTracks?db=hg19&position=chr2:40389517-41142944&hgsid=443362677_4V80BwZqd7j9QbFDPX1nAl3yp6cs
2	41526979	42051799	39873882	42051799	40	-1.0321	41526979	42079731	17	-2.4849	http://genome.ucsc.edu/cgi-bin/hgTracks?db=hg19&position=chr2:41476979-42101799&hgsid=443362677_4V80BwZqd7j9QbFDPX1nAl3yp6cs
2	42079731	42079731	42079731	48780719	380	-0.2898	41526979	42079731	17	-2.4849	http://genome.ucsc.edu/cgi-bin/hgTracks?db=hg19&position=chr2:42029731-42129731&hgsid=443362677_4V80BwZqd7j9QbFDPX1nAl3yp6cs
2	42089674	48780719	42079731	48780719	380	-0.2898	42089674	48826135	383	-0.0637	http://genome.ucsc.edu/cgi-bin/hgTracks?db=hg19&position=chr2:42039674-48830719&hgsid=443362677_4V80BwZqd7j9QbFDPX1nAl3yp6cs
2	48785286	48826135	48785286	53871754	127	-0.7505	42089674	48826135	383	-0.0637	http://genome.ucsc.edu/cgi-bin/hgTracks?db=hg19&position=chr2:48735286-48876135&hgsid=443362677_4V80BwZqd7j9QbFDPX1nAl3yp6cs
2	48834845	50661290	48785286	53871754	127	-0.7505	48834845	50661290	44	-1.6288	http://genome.ucsc.edu/cgi-bin/hgTracks?db=hg19&position=chr2:48784845-50711290&hgsid=443362677_4V80BwZqd7j9QbFDPX1nAl3yp6cs
2	50708996	53871754	48785286	53871754	127	-0.7505	50708996	58819150	269	0.061	http://genome.ucsc.edu/cgi-bin/hgTracks?db=hg19&position=chr2:50658996-53921754&hgsid=443362677_4V80BwZqd7j9QbFDPX1nAl3yp6cs
2	53971445	56030591	53971445	56030591	119	-0.2094	50708996	58819150	269	0.061	http://genome.ucsc.edu/cgi-bin/hgTracks?db=hg19&position=chr2:53921445-56080591&hgsid=443362677_4V80BwZqd7j9QbFDPX1nAl3yp6cs
2	56051504	58819150	56051504	59695431	87	-0.9856	50708996	58819150	269	0.061	http://genome.ucsc.edu/cgi-bin/hgTracks?db=hg19&position=chr2:56001504-58869150&hgsid=443362677_4V80BwZqd7j9QbFDPX1nAl3yp6cs
2	58952996	59695431	56051504	59695431	87	-0.9856	58952996	60931250	52	-1.232	http://genome.ucsc.edu/cgi-bin/hgTracks?db=hg19&position=chr2:58902996-59745431&hgsid=443362677_4V80BwZqd7j9QbFDPX1nAl3yp6cs
2	59758800	60656461	59758800	60656461	22	-0.0627	58952996	60931250	52	-1.232	http://genome.ucsc.edu/cgi-bin/hgTracks?db=hg19&position=chr2:59708800-60706461&hgsid=443362677_4V80BwZqd7j9QbFDPX1nAl3yp6cs
2	60676576	60910791	60676576	60910791	12	-1.3051	58952996	60931250	52	-1.232	http://genome.ucsc.edu/cgi-bin/hgTracks?db=hg19&position=chr2:60626576-60960791&hgsid=443362677_4V80BwZqd7j9QbFDPX1nAl3yp6cs
2	60915376	60931250	60915376	65903907	373	-0.2461	58952996	60931250	52	-1.232	http://genome.ucsc.edu/cgi-bin/hgTracks?db=hg19&position=chr2:60865376-60981250&hgsid=443362677_4V80BwZqd7j9QbFDPX1nAl3yp6cs
2	60937115	65903907	60915376	65903907	373	-0.2461	60937115	65903907	371	-0.0928	http://genome.ucsc.edu/cgi-bin/hgTracks?db=hg19&position=chr2:60887115-65953907&hgsid=443362677_4V80BwZqd7j9QbFDPX1nAl3yp6cs
2	65967794	66747537	65967794	66747537	22	-1.1086	65967794	68254069	51	-1.8671	http://genome.ucsc.edu/cgi-bin/hgTracks?db=hg19&position=chr2:65917794-66797537&hgsid=443362677_4V80BwZqd7j9QbFDPX1nAl3yp6cs
2	66766112	68254069	66766112	75864113	442	-0.3283	65967794	68254069	51	-1.8671	http://genome.ucsc.edu/cgi-bin/hgTracks?db=hg19&position=chr2:66716112-68304069&hgsid=443362677_4V80BwZqd7j9QbFDPX1nAl3yp6cs
2	68271764	75238476	66766112	75864113	442	-0.3283	68271764	75238476	407	-0.0144	http://genome.ucsc.edu/cgi-bin/hgTracks?db=hg19&position=chr2:68221764-75288476&hgsid=443362677_4V80BwZqd7j9QbFDPX1nAl3yp6cs
2	75352402	75864113	66766112	75864113	442	-0.3283	75352402	80902459	148	-1.9231	http://genome.ucsc.edu/cgi-bin/hgTracks?db=hg19&position=chr2:75302402-75914113&hgsid=443362677_4V80BwZqd7j9QbFDPX1nAl3yp6cs
2	75935730	80902459	75935730	84054713	233	-1.0614	75352402	80902459	148	-1.9231	http://genome.ucsc.edu/cgi-bin/hgTracks?db=hg19&position=chr2:75885730-80952459&hgsid=443362677_4V80BwZqd7j9QbFDPX1nAl3yp6cs
2	80947288	81211889	75935730	84054713	233	-1.0614	80947288	81211889	9	-0.8523	http://genome.ucsc.edu/cgi-bin/hgTracks?db=hg19&position=chr2:80897288-81261889&hgsid=443362677_4V80BwZqd7j9QbFDPX1nAl3yp6cs
2	81308349	84054713	75935730	84054713	233	-1.0614	81308349	89130472	354	0.0157	http://genome.ucsc.edu/cgi-bin/hgTracks?db=hg19&position=chr2:81258349-84104713&hgsid=443362677_4V80BwZqd7j9QbFDPX1nAl3yp6cs
2	84072630	89130472	84072630	92242661	316	-0.434	81308349	89130472	354	0.0157	http://genome.ucsc.edu/cgi-bin/hgTracks?db=hg19&position=chr2:84022630-89180472&hgsid=443362677_4V80BwZqd7j9QbFDPX1nAl3yp6cs
2	89162582	92242661	84072630	92242661	316	-0.434	89162582	92242661	44	-1.1534	http://genome.ucsc.edu/cgi-bin/hgTracks?db=hg19&position=chr2:89112582-92292661&hgsid=443362677_4V80BwZqd7j9QbFDPX1nAl3yp6cs
2	95338540	100123311	95338540	100123311	248	-0.2337	95338540	100137213	250	-0.065	http://genome.ucsc.edu/cgi-bin/hgTracks?db=hg19&position=chr2:95288540-100173311&hgsid=443362677_4V80BwZqd7j9QbFDPX1nAl3yp6cs
2	100131436	100137213	100131436	101167292	48	-1.1744	95338540	100137213	250	-0.065	http://genome.ucsc.edu/cgi-bin/hgTracks?db=hg19&position=chr2:100081436-100187213&hgsid=443362677_4V80BwZqd7j9QbFDPX1nAl3yp6cs
2	100159392	100748014	100131436	101167292	48	-1.1744	100159392	100748014	29	-1.869	http://genome.ucsc.edu/cgi-bin/hgTracks?db=hg19&position=chr2:100109392-100798014&hgsid=443362677_4V80BwZqd7j9QbFDPX1nAl3yp6cs
2	100781771	101167292	100131436	101167292	48	-1.1744	100781771	103572594	170	-0.0449	http://genome.ucsc.edu/cgi-bin/hgTracks?db=hg19&position=chr2:100731771-101217292&hgsid=443362677_4V80BwZqd7j9QbFDPX1nAl3yp6cs
2	101170046	102829353	101170046	102829353	125	-0.2463	100781771	103572594	170	-0.0449	http://genome.ucsc.edu/cgi-bin/hgTracks?db=hg19&position=chr2:101120046-102879353&hgsid=443362677_4V80BwZqd7j9QbFDPX1nAl3yp6cs
2	102881216	102991162	102881216	102991162	7	-1.5389	100781771	103572594	170	-0.0449	http://genome.ucsc.edu/cgi-bin/hgTracks?db=hg19&position=chr2:102831216-103041162&hgsid=443362677_4V80BwZqd7j9QbFDPX1nAl3yp6cs
2	103026904	103438371	103026904	103438371	19	-0.063	100781771	103572594	170	-0.0449	http://genome.ucsc.edu/cgi-bin/hgTracks?db=hg19&position=chr2:102976904-103488371&hgsid=443362677_4V80BwZqd7j9QbFDPX1nAl3yp6cs
2	103482848	103572594	103482848	104324516	34	-1.1222	100781771	103572594	170	-0.0449	http://genome.ucsc.edu/cgi-bin/hgTracks?db=hg19&position=chr2:103432848-103622594&hgsid=443362677_4V80BwZqd7j9QbFDPX1nAl3yp6cs
2	103574332	104324516	103482848	104324516	34	-1.1222	103574332	105402189	64	-1.8616	http://genome.ucsc.edu/cgi-bin/hgTracks?db=hg19&position=chr2:103524332-104374516&hgsid=443362677_4V80BwZqd7j9QbFDPX1nAl3yp6cs
2	104382852	105402189	104382852	107414906	114	-0.4346	103574332	105402189	64	-1.8616	http://genome.ucsc.edu/cgi-bin/hgTracks?db=hg19&position=chr2:104332852-105452189&hgsid=443362677_4V80BwZqd7j9QbFDPX1nAl3yp6cs
2	105536565	107259688	104382852	107414906	114	-0.4346	105536565	107259688	79	-0.2031	http://genome.ucsc.edu/cgi-bin/hgTracks?db=hg19&position=chr2:105486565-107309688&hgsid=443362677_4V80BwZqd7j9QbFDPX1nAl3yp6cs
2	107378994	107414906	104382852	107414906	114	-0.4346	107378994	108913000	43	-1.6539	http://genome.ucsc.edu/cgi-bin/hgTracks?db=hg19&position=chr2:107328994-107464906&hgsid=443362677_4V80BwZqd7j9QbFDPX1nAl3yp6cs
2	107489150	108398055	107489150	108398055	24	-0.9964	107378994	108913000	43	-1.6539	http://genome.ucsc.edu/cgi-bin/hgTracks?db=hg19&position=chr2:107439150-108448055&hgsid=443362677_4V80BwZqd7j9QbFDPX1nAl3yp6cs
2	108409602	108913000	108409602	111439107	117	-0.2215	107378994	108913000	43	-1.6539	http://genome.ucsc.edu/cgi-bin/hgTracks?db=hg19&position=chr2:108359602-108963000&hgsid=443362677_4V80BwZqd7j9QbFDPX1nAl3yp6cs
2	108917961	111439107	108409602	111439107	117	-0.2215	108917961	114750600	269	-0.0534	http://genome.ucsc.edu/cgi-bin/hgTracks?db=hg19&position=chr2:108867961-111489107&hgsid=443362677_4V80BwZqd7j9QbFDPX1nAl3yp6cs
2	111513796	111734887	111513796	111734887	8	-1.4549	108917961	114750600	269	-0.0534	http://genome.ucsc.edu/cgi-bin/hgTracks?db=hg19&position=chr2:111463796-111784887&hgsid=443362677_4V80BwZqd7j9QbFDPX1nAl3yp6cs
2	111738859	114750600	111738859	129006147	692	-0.4799	108917961	114750600	269	-0.0534	http://genome.ucsc.edu/cgi-bin/hgTracks?db=hg19&position=chr2:111688859-114800600&hgsid=443362677_4V80BwZqd7j9QbFDPX1nAl3yp6cs
2	114768844	118470695	111738859	129006147	692	-0.4799	114768844	118470695	104	-1.918	http://genome.ucsc.edu/cgi-bin/hgTracks?db=hg19&position=chr2:114718844-118520695&hgsid=443362677_4V80BwZqd7j9QbFDPX1nAl3yp6cs
2	118535048	122598350	111738859	129006147	692	-0.4799	118535048	122598350	171	-0.1294	http://genome.ucsc.edu/cgi-bin/hgTracks?db=hg19&position=chr2:118485048-122648350&hgsid=443362677_4V80BwZqd7j9QbFDPX1nAl3yp6cs
2	122607551	127553999	111738859	129006147	692	-0.4799	122607551	127553999	133	-1.7786	http://genome.ucsc.edu/cgi-bin/hgTracks?db=hg19&position=chr2:122557551-127603999&hgsid=443362677_4V80BwZqd7j9QbFDPX1nAl3yp6cs
2	127562631	129006147	111738859	129006147	692	-0.4799	127562631	129414512	141	-0.2069	http://genome.ucsc.edu/cgi-bin/hgTracks?db=hg19&position=chr2:127512631-129056147&hgsid=443362677_4V80BwZqd7j9QbFDPX1nAl3yp6cs
2	129022086	129414512	129022086	130624931	59	-1.1405	127562631	129414512	141	-0.2069	http://genome.ucsc.edu/cgi-bin/hgTracks?db=hg19&position=chr2:128972086-129464512&hgsid=443362677_4V80BwZqd7j9QbFDPX1nAl3yp6cs
2	129428452	130511476	129022086	130624931	59	-1.1405	129428452	130511476	38	-1.798	http://genome.ucsc.edu/cgi-bin/hgTracks?db=hg19&position=chr2:129378452-130561476&hgsid=443362677_4V80BwZqd7j9QbFDPX1nAl3yp6cs
2	130518107	130624931	129022086	130624931	59	-1.1405	130518107	133420939	146	-0.4175	http://genome.ucsc.edu/cgi-bin/hgTracks?db=hg19&position=chr2:130468107-130674931&hgsid=443362677_4V80BwZqd7j9QbFDPX1nAl3yp6cs
2	130632170	133420939	130632170	145322332	538	-0.6045	130518107	133420939	146	-0.4175	http://genome.ucsc.edu/cgi-bin/hgTracks?db=hg19&position=chr2:130582170-133470939&hgsid=443362677_4V80BwZqd7j9QbFDPX1nAl3yp6cs
2	133456331	134120418	130632170	145322332	538	-0.6045	133456331	134120418	28	-2.182	http://genome.ucsc.edu/cgi-bin/hgTracks?db=hg19&position=chr2:133406331-134170418&hgsid=443362677_4V80BwZqd7j9QbFDPX1nAl3yp6cs
2	134230827	137173802	130632170	145322332	538	-0.6045	134230827	137173802	167	-0.2814	http://genome.ucsc.edu/cgi-bin/hgTracks?db=hg19&position=chr2:134180827-137223802&hgsid=443362677_4V80BwZqd7j9QbFDPX1nAl3yp6cs
2	137343026	138552075	130632170	145322332	538	-0.6045	137343026	138552075	25	-1.8468	http://genome.ucsc.edu/cgi-bin/hgTracks?db=hg19&position=chr2:137293026-138602075&hgsid=443362677_4V80BwZqd7j9QbFDPX1nAl3yp6cs
2	138576772	143885175	130632170	145322332	538	-0.6045	138576772	143885175	135	0.2355	http://genome.ucsc.edu/cgi-bin/hgTracks?db=hg19&position=chr2:138526772-143935175&hgsid=443362677_4V80BwZqd7j9QbFDPX1nAl3yp6cs
2	143892296	144075660	130632170	145322332	538	-0.6045	143892296	144075660	6	-2.5588	http://genome.ucsc.edu/cgi-bin/hgTracks?db=hg19&position=chr2:143842296-144125660&hgsid=443362677_4V80BwZqd7j9QbFDPX1nAl3yp6cs
2	144081386	145322332	130632170	145322332	538	-0.6045	144081386	163232968	555	0.0755	http://genome.ucsc.edu/cgi-bin/hgTracks?db=hg19&position=chr2:144031386-145372332&hgsid=443362677_4V80BwZqd7j9QbFDPX1nAl3yp6cs
2	145347364	147753826	145347364	147753826	58	-1.4027	144081386	163232968	555	0.0755	http://genome.ucsc.edu/cgi-bin/hgTracks?db=hg19&position=chr2:145297364-147803826&hgsid=443362677_4V80BwZqd7j9QbFDPX1nAl3yp6cs
2	147794497	153695166	147794497	153695166	204	-0.3682	144081386	163232968	555	0.0755	http://genome.ucsc.edu/cgi-bin/hgTracks?db=hg19&position=chr2:147744497-153745166&hgsid=443362677_4V80BwZqd7j9QbFDPX1nAl3yp6cs
2	153714838	156501759	153714838	156501759	60	-1.1589	144081386	163232968	555	0.0755	http://genome.ucsc.edu/cgi-bin/hgTracks?db=hg19&position=chr2:153664838-156551759&hgsid=443362677_4V80BwZqd7j9QbFDPX1nAl3yp6cs
2	156518192	163232968	156518192	181925942	937	-0.446	144081386	163232968	555	0.0755	http://genome.ucsc.edu/cgi-bin/hgTracks?db=hg19&position=chr2:156468192-163282968&hgsid=443362677_4V80BwZqd7j9QbFDPX1nAl3yp6cs
2	163316528	165389835	156518192	181925942	937	-0.446	163316528	165389835	56	-1.4612	http://genome.ucsc.edu/cgi-bin/hgTracks?db=hg19&position=chr2:163266528-165439835&hgsid=443362677_4V80BwZqd7j9QbFDPX1nAl3yp6cs
2	165426711	165859946	156518192	181925942	937	-0.446	165426711	165859946	16	0.1903	http://genome.ucsc.edu/cgi-bin/hgTracks?db=hg19&position=chr2:165376711-165909946&hgsid=443362677_4V80BwZqd7j9QbFDPX1nAl3yp6cs
2	165869193	166471977	156518192	181925942	937	-0.446	165869193	166471977	18	-1.1757	http://genome.ucsc.edu/cgi-bin/hgTracks?db=hg19&position=chr2:165819193-166521977&hgsid=443362677_4V80BwZqd7j9QbFDPX1nAl3yp6cs
2	166508258	166817966	156518192	181925942	937	-0.446	166508258	166817966	7	0.2678	http://genome.ucsc.edu/cgi-bin/hgTracks?db=hg19&position=chr2:166458258-166867966&hgsid=443362677_4V80BwZqd7j9QbFDPX1nAl3yp6cs
2	166821959	168631100	156518192	181925942	937	-0.446	166821959	168631100	43	-1.6222	http://genome.ucsc.edu/cgi-bin/hgTracks?db=hg19&position=chr2:166771959-168681100&hgsid=443362677_4V80BwZqd7j9QbFDPX1nAl3yp6cs
2	168660592	177507269	156518192	181925942	937	-0.446	168660592	177507269	457	-0.0091	http://genome.ucsc.edu/cgi-bin/hgTracks?db=hg19&position=chr2:168610592-177557269&hgsid=443362677_4V80BwZqd7j9QbFDPX1nAl3yp6cs
2	177530435	177918215	156518192	181925942	937	-0.446	177530435	177918215	12	-2.1378	http://genome.ucsc.edu/cgi-bin/hgTracks?db=hg19&position=chr2:177480435-177968215&hgsid=443362677_4V80BwZqd7j9QbFDPX1nAl3yp6cs
2	177920044	181925942	156518192	181925942	937	-0.446	177920044	198611548	666	0.0544	http://genome.ucsc.edu/cgi-bin/hgTracks?db=hg19&position=chr2:177870044-181975942&hgsid=443362677_4V80BwZqd7j9QbFDPX1nAl3yp6cs
2	181961123	182353378	181961123	182353378	10	-1.8242	177920044	198611548	666	0.0544	http://genome.ucsc.edu/cgi-bin/hgTracks?db=hg19&position=chr2:181911123-182403378&hgsid=443362677_4V80BwZqd7j9QbFDPX1nAl3yp6cs
2	182466213	184965103	182466213	184965103	85	-0.5413	177920044	198611548	666	0.0544	http://genome.ucsc.edu/cgi-bin/hgTracks?db=hg19&position=chr2:182416213-185015103&hgsid=443362677_4V80BwZqd7j9QbFDPX1nAl3yp6cs
2	184997318	186003694	184997318	186003694	17	-1.2307	177920044	198611548	666	0.0544	http://genome.ucsc.edu/cgi-bin/hgTracks?db=hg19&position=chr2:184947318-186053694&hgsid=443362677_4V80BwZqd7j9QbFDPX1nAl3yp6cs
2	186081603	187735529	186081603	187735529	40	-0.3437	177920044	198611548	666	0.0544	http://genome.ucsc.edu/cgi-bin/hgTracks?db=hg19&position=chr2:186031603-187785529&hgsid=443362677_4V80BwZqd7j9QbFDPX1nAl3yp6cs
2	187760581	190160265	187760581	190160265	80	-0.9965	177920044	198611548	666	0.0544	http://genome.ucsc.edu/cgi-bin/hgTracks?db=hg19&position=chr2:187710581-190210265&hgsid=443362677_4V80BwZqd7j9QbFDPX1nAl3yp6cs
2	190202001	198611548	190202001	207135386	828	-0.2972	177920044	198611548	666	0.0544	http://genome.ucsc.edu/cgi-bin/hgTracks?db=hg19&position=chr2:190152001-198661548&hgsid=443362677_4V80BwZqd7j9QbFDPX1nAl3yp6cs
2	198701095	199927065	190202001	207135386	828	-0.2972	198701095	199927065	21	-1.4209	http://genome.ucsc.edu/cgi-bin/hgTracks?db=hg19&position=chr2:198651095-199977065&hgsid=443362677_4V80BwZqd7j9QbFDPX1nAl3yp6cs
2	199969457	204851706	190202001	207135386	828	-0.2972	199969457	204851706	392	-0.0111	http://genome.ucsc.edu/cgi-bin/hgTracks?db=hg19&position=chr2:199919457-204901706&hgsid=443362677_4V80BwZqd7j9QbFDPX1nAl3yp6cs
2	204855125	206707180	190202001	207135386	828	-0.2972	204855125	206707180	59	-1.0717	http://genome.ucsc.edu/cgi-bin/hgTracks?db=hg19&position=chr2:204805125-206757180&hgsid=443362677_4V80BwZqd7j9QbFDPX1nAl3yp6cs
2	206726480	207135386	190202001	207135386	828	-0.2972	206726480	209293734	154	0.0291	http://genome.ucsc.edu/cgi-bin/hgTracks?db=hg19&position=chr2:206676480-207185386&hgsid=443362677_4V80BwZqd7j9QbFDPX1nAl3yp6cs
2	207177231	208294693	207177231	208294693	27	-1.1578	206726480	209293734	154	0.0291	http://genome.ucsc.edu/cgi-bin/hgTracks?db=hg19&position=chr2:207127231-208344693&hgsid=443362677_4V80BwZqd7j9QbFDPX1nAl3yp6cs
2	208305450	209293734	208305450	228712503	912	-0.5516	206726480	209293734	154	0.0291	http://genome.ucsc.edu/cgi-bin/hgTracks?db=hg19&position=chr2:208255450-209343734&hgsid=443362677_4V80BwZqd7j9QbFDPX1nAl3yp6cs
2	209295364	210112605	208305450	228712503	912	-0.5516	209295364	210112605	21	-1.3519	http://genome.ucsc.edu/cgi-bin/hgTracks?db=hg19&position=chr2:209245364-210162605&hgsid=443362677_4V80BwZqd7j9QbFDPX1nAl3yp6cs
2	210124880	217650232	208305450	228712503	912	-0.5516	210124880	217650232	284	0.0379	http://genome.ucsc.edu/cgi-bin/hgTracks?db=hg19&position=chr2:210074880-217700232&hgsid=443362677_4V80BwZqd7j9QbFDPX1nAl3yp6cs
2	217676239	218506089	208305450	228712503	912	-0.5516	217676239	218506089	16	-1.8276	http://genome.ucsc.edu/cgi-bin/hgTracks?db=hg19&position=chr2:217626239-218556089&hgsid=443362677_4V80BwZqd7j9QbFDPX1nAl3yp6cs
2	218516054	221833996	208305450	228712503	912	-0.5516	218516054	221833996	195	0.0708	http://genome.ucsc.edu/cgi-bin/hgTracks?db=hg19&position=chr2:218466054-221883996&hgsid=443362677_4V80BwZqd7j9QbFDPX1nAl3yp6cs
2	221837593	223417503	208305450	228712503	912	-0.5516	221837593	223417503	55	-1.0656	http://genome.ucsc.edu/cgi-bin/hgTracks?db=hg19&position=chr2:221787593-223467503&hgsid=443362677_4V80BwZqd7j9QbFDPX1nAl3yp6cs
2	223468861	228712503	208305450	228712503	912	-0.5516	223468861	229577670	290	0.0439	http://genome.ucsc.edu/cgi-bin/hgTracks?db=hg19&position=chr2:223418861-228762503&hgsid=443362677_4V80BwZqd7j9QbFDPX1nAl3yp6cs
2	228801572	229577670	228801572	229840917	30	-1.2263	223468861	229577670	290	0.0439	http://genome.ucsc.edu/cgi-bin/hgTracks?db=hg19&position=chr2:228751572-229627670&hgsid=443362677_4V80BwZqd7j9QbFDPX1nAl3yp6cs
2	229619597	229840917	228801572	229840917	30	-1.2263	229619597	229977294	9	-1.9267	http://genome.ucsc.edu/cgi-bin/hgTracks?db=hg19&position=chr2:229569597-229890917&hgsid=443362677_4V80BwZqd7j9QbFDPX1nAl3yp6cs
2	229937228	229977294	229937228	243062779	689	-0.2735	229619597	229977294	9	-1.9267	http://genome.ucsc.edu/cgi-bin/hgTracks?db=hg19&position=chr2:229887228-230027294&hgsid=443362677_4V80BwZqd7j9QbFDPX1nAl3yp6cs
2	229996039	237283426	229937228	243062779	689	-0.2735	229996039	237283426	431	0.0122	http://genome.ucsc.edu/cgi-bin/hgTracks?db=hg19&position=chr2:229946039-237333426&hgsid=443362677_4V80BwZqd7j9QbFDPX1nAl3yp6cs
2	237315481	237887100	229937228	243062779	689	-0.2735	237315481	237887100	23	-2.1411	http://genome.ucsc.edu/cgi-bin/hgTracks?db=hg19&position=chr2:237265481-237937100&hgsid=443362677_4V80BwZqd7j9QbFDPX1nAl3yp6cs
2	237917204	243062779	229937228	243062779	689	-0.2735	237917204	243062779	232	-0.0806	http://genome.ucsc.edu/cgi-bin/hgTracks?db=hg19&position=chr2:237867204-243112779&hgsid=443362677_4V80BwZqd7j9QbFDPX1nAl3yp6cs
3	81317	3153827	81317	3153827	105	-0.9026	81317	3741000	120	-1.846	http://genome.ucsc.edu/cgi-bin/hgTracks?db=hg19&position=chr3:31317-3203827&hgsid=443362677_4V80BwZqd7j9QbFDPX1nAl3yp6cs
3	3163386	3741000	3163386	4629050	28	-0.1206	81317	3741000	120	-1.846	http://genome.ucsc.edu/cgi-bin/hgTracks?db=hg19&position=chr3:3113386-3791000&hgsid=443362677_4V80BwZqd7j9QbFDPX1nAl3yp6cs
3	3995022	4629050	3163386	4629050	28	-0.1206	3995022	6394644	80	-0.1009	http://genome.ucsc.edu/cgi-bin/hgTracks?db=hg19&position=chr3:3945022-4679050&hgsid=443362677_4V80BwZqd7j9QbFDPX1nAl3yp6cs
3	4657153	4667333	4657153	4667333	4	-2.2304	3995022	6394644	80	-0.1009	http://genome.ucsc.edu/cgi-bin/hgTracks?db=hg19&position=chr3:4607153-4717333&hgsid=443362677_4V80BwZqd7j9QbFDPX1nAl3yp6cs
3	4674715	6298012	4674715	6298012	59	-0.4125	3995022	6394644	80	-0.1009	http://genome.ucsc.edu/cgi-bin/hgTracks?db=hg19&position=chr3:4624715-6348012&hgsid=443362677_4V80BwZqd7j9QbFDPX1nAl3yp6cs
3	6337139	6394644	6337139	8499437	69	-0.9054	3995022	6394644	80	-0.1009	http://genome.ucsc.edu/cgi-bin/hgTracks?db=hg19&position=chr3:6287139-6444644&hgsid=443362677_4V80BwZqd7j9QbFDPX1nAl3yp6cs
3	6497246	7294468	6337139	8499437	69	-0.9054	6497246	7294468	34	-1.7938	http://genome.ucsc.edu/cgi-bin/hgTracks?db=hg19&position=chr3:6447246-7344468&hgsid=443362677_4V80BwZqd7j9QbFDPX1nAl3yp6cs
3	7313170	8499437	6337139	8499437	69	-0.9054	7313170	18427039	536	-0.0407	http://genome.ucsc.edu/cgi-bin/hgTracks?db=hg19&position=chr3:7263170-8549437&hgsid=443362677_4V80BwZqd7j9QbFDPX1nAl3yp6cs
3	8505356	18427039	8505356	20253077	549	-0.2606	7313170	18427039	536	-0.0407	http://genome.ucsc.edu/cgi-bin/hgTracks?db=hg19&position=chr3:8455356-18477039&hgsid=443362677_4V80BwZqd7j9QbFDPX1nAl3yp6cs
3	18578661	18774471	8505356	20253077	549	-0.2606	18578661	18774471	5	-2.5368	http://genome.ucsc.edu/cgi-bin/hgTracks?db=hg19&position=chr3:18528661-18824471&hgsid=443362677_4V80BwZqd7j9QbFDPX1nAl3yp6cs
3	18839798	19340338	8505356	20253077	549	-0.2606	18839798	19340338	12	-1.2828	http://genome.ucsc.edu/cgi-bin/hgTracks?db=hg19&position=chr3:18789798-19390338&hgsid=443362677_4V80BwZqd7j9QbFDPX1nAl3yp6cs
3	19364865	19763520	8505356	20253077	549	-0.2606	19364865	19763520	4	-2.6264	http://genome.ucsc.edu/cgi-bin/hgTracks?db=hg19&position=chr3:19314865-19813520&hgsid=443362677_4V80BwZqd7j9QbFDPX1nAl3yp6cs
3	19911365	20253077	8505356	20253077	549	-0.2606	19911365	20338892	24	0.1723	http://genome.ucsc.edu/cgi-bin/hgTracks?db=hg19&position=chr3:19861365-20303077&hgsid=443362677_4V80BwZqd7j9QbFDPX1nAl3yp6cs
3	20338892	20338892	20338892	23445239	56	-1.0241	19911365	20338892	24	0.1723	http://genome.ucsc.edu/cgi-bin/hgTracks?db=hg19&position=chr3:20288892-20388892&hgsid=443362677_4V80BwZqd7j9QbFDPX1nAl3yp6cs
3	20481202	23239633	20338892	23445239	56	-1.0241	20481202	23239633	53	-2.0492	http://genome.ucsc.edu/cgi-bin/hgTracks?db=hg19&position=chr3:20431202-23289633&hgsid=443362677_4V80BwZqd7j9QbFDPX1nAl3yp6cs
3	23300308	23445239	20338892	23445239	56	-1.0241	23300308	24920844	59	-0.3159	http://genome.ucsc.edu/cgi-bin/hgTracks?db=hg19&position=chr3:23250308-23495239&hgsid=443362677_4V80BwZqd7j9QbFDPX1nAl3yp6cs
3	23482954	24920844	23482954	90281211	2862	-0.3878	23300308	24920844	59	-0.3159	http://genome.ucsc.edu/cgi-bin/hgTracks?db=hg19&position=chr3:23432954-24970844&hgsid=443362677_4V80BwZqd7j9QbFDPX1nAl3yp6cs
3	25031383	25411337	23482954	90281211	2862	-0.3878	25031383	25411337	9	-2.3071	http://genome.ucsc.edu/cgi-bin/hgTracks?db=hg19&position=chr3:24981383-25461337&hgsid=443362677_4V80BwZqd7j9QbFDPX1nAl3yp6cs
3	25443360	25934611	23482954	90281211	2862	-0.3878	25443360	25934611	22	-0.438	http://genome.ucsc.edu/cgi-bin/hgTracks?db=hg19&position=chr3:25393360-25984611&hgsid=443362677_4V80BwZqd7j9QbFDPX1nAl3yp6cs
3	25939988	27235709	23482954	90281211	2862	-0.3878	25939988	27235709	26	-1.5092	http://genome.ucsc.edu/cgi-bin/hgTracks?db=hg19&position=chr3:25889988-27285709&hgsid=443362677_4V80BwZqd7j9QbFDPX1nAl3yp6cs
3	27325801	34039060	23482954	90281211	2862	-0.3878	27325801	34039060	320	-0.1684	http://genome.ucsc.edu/cgi-bin/hgTracks?db=hg19&position=chr3:27275801-34089060&hgsid=443362677_4V80BwZqd7j9QbFDPX1nAl3yp6cs
3	34051972	36680501	23482954	90281211	2862	-0.3878	34051972	36680501	37	-2.0475	http://genome.ucsc.edu/cgi-bin/hgTracks?db=hg19&position=chr3:34001972-36730501&hgsid=443362677_4V80BwZqd7j9QbFDPX1nAl3yp6cs
3	36791664	54044080	23482954	90281211	2862	-0.3878	36791664	54044080	1147	-0.1132	http://genome.ucsc.edu/cgi-bin/hgTracks?db=hg19&position=chr3:36741664-54094080&hgsid=443362677_4V80BwZqd7j9QbFDPX1nAl3yp6cs
3	54055679	56544069	23482954	90281211	2862	-0.3878	54055679	56544069	73	-2.1051	http://genome.ucsc.edu/cgi-bin/hgTracks?db=hg19&position=chr3:54005679-56594069&hgsid=443362677_4V80BwZqd7j9QbFDPX1nAl3yp6cs
3	56585653	59113863	23482954	90281211	2862	-0.3878	56585653	59113863	215	0.0159	http://genome.ucsc.edu/cgi-bin/hgTracks?db=hg19&position=chr3:56535653-59163863&hgsid=443362677_4V80BwZqd7j9QbFDPX1nAl3yp6cs
3	59125441	60023532	23482954	90281211	2862	-0.3878	59125441	60023532	24	-1.2943	http://genome.ucsc.edu/cgi-bin/hgTracks?db=hg19&position=chr3:59075441-60073532&hgsid=443362677_4V80BwZqd7j9QbFDPX1nAl3yp6cs
3	60086034	62311623	23482954	90281211	2862	-0.3878	60086034	62311623	79	-0.0464	http://genome.ucsc.edu/cgi-bin/hgTracks?db=hg19&position=chr3:60036034-62361623&hgsid=443362677_4V80BwZqd7j9QbFDPX1nAl3yp6cs
3	62370088	63736356	23482954	90281211	2862	-0.3878	62370088	63736356	27	-1.6545	http://genome.ucsc.edu/cgi-bin/hgTracks?db=hg19&position=chr3:62320088-63786356&hgsid=443362677_4V80BwZqd7j9QbFDPX1nAl3yp6cs
3	63793457	64114346	23482954	90281211	2862	-0.3878	63793457	64114346	19	-0.2862	http://genome.ucsc.edu/cgi-bin/hgTracks?db=hg19&position=chr3:63743457-64164346&hgsid=443362677_4V80BwZqd7j9QbFDPX1nAl3yp6cs
3	64132343	65291177	23482954	90281211	2862	-0.3878	64132343	65291177	32	-1.8987	http://genome.ucsc.edu/cgi-bin/hgTracks?db=hg19&position=chr3:64082343-65341177&hgsid=443362677_4V80BwZqd7j9QbFDPX1nAl3yp6cs
3	65360956	66829541	23482954	90281211	2862	-0.3878	65360956	66829541	67	-0.0671	http://genome.ucsc.edu/cgi-bin/hgTracks?db=hg19&position=chr3:65310956-66879541&hgsid=443362677_4V80BwZqd7j9QbFDPX1nAl3yp6cs
3	66849678	67250878	23482954	90281211	2862	-0.3878	66849678	67250878	18	-1.4782	http://genome.ucsc.edu/cgi-bin/hgTracks?db=hg19&position=chr3:66799678-67300878&hgsid=443362677_4V80BwZqd7j9QbFDPX1nAl3yp6cs
3	67365621	67755788	23482954	90281211	2862	-0.3878	67365621	67755788	12	-0.1586	http://genome.ucsc.edu/cgi-bin/hgTracks?db=hg19&position=chr3:67315621-67805788&hgsid=443362677_4V80BwZqd7j9QbFDPX1nAl3yp6cs
3	67796450	68946701	23482954	90281211	2862	-0.3878	67796450	68946701	23	-2.1161	http://genome.ucsc.edu/cgi-bin/hgTracks?db=hg19&position=chr3:67746450-68996701&hgsid=443362677_4V80BwZqd7j9QbFDPX1nAl3yp6cs
3	69076239	69392823	23482954	90281211	2862	-0.3878	69076239	69392823	22	-0.404	http://genome.ucsc.edu/cgi-bin/hgTracks?db=hg19&position=chr3:69026239-69442823&hgsid=443362677_4V80BwZqd7j9QbFDPX1nAl3yp6cs
3	69438277	71608046	23482954	90281211	2862	-0.3878	69438277	71608046	75	-1.7835	http://genome.ucsc.edu/cgi-bin/hgTracks?db=hg19&position=chr3:69388277-71658046&hgsid=443362677_4V80BwZqd7j9QbFDPX1nAl3yp6cs
3	71614175	73185133	23482954	90281211	2862	-0.3878	71614175	73185133	83	-0.2978	http://genome.ucsc.edu/cgi-bin/hgTracks?db=hg19&position=chr3:71564175-73235133&hgsid=443362677_4V80BwZqd7j9QbFDPX1nAl3yp6cs
3	73195830	81433739	23482954	90281211	2862	-0.3878	73195830	81433739	257	-1.8768	http://genome.ucsc.edu/cgi-bin/hgTracks?db=hg19&position=chr3:73145830-81483739&hgsid=443362677_4V80BwZqd7j9QbFDPX1nAl3yp6cs
3	81464606	82425982	23482954	90281211	2862	-0.3878	81464606	82425982	24	-0.4198	http://genome.ucsc.edu/cgi-bin/hgTracks?db=hg19&position=chr3:81414606-82475982&hgsid=443362677_4V80BwZqd7j9QbFDPX1nAl3yp6cs
3	82430517	86998901	23482954	90281211	2862	-0.3878	82430517	86998901	117	-2.0684	http://genome.ucsc.edu/cgi-bin/hgTracks?db=hg19&position=chr3:82380517-87048901&hgsid=443362677_4V80BwZqd7j9QbFDPX1nAl3yp6cs
3	87005859	88322778	23482954	90281211	2862	-0.3878	87005859	88322778	40	-0.2223	http://genome.ucsc.edu/cgi-bin/hgTracks?db=hg19&position=chr3:86955859-88372778&hgsid=443362677_4V80BwZqd7j9QbFDPX1nAl3yp6cs
3	88328676	90281211	23482954	90281211	2862	-0.3878	88328676	90281211	37	-1.9376	http://genome.ucsc.edu/cgi-bin/hgTracks?db=hg19&position=chr3:88278676-90331211&hgsid=443362677_4V80BwZqd7j9QbFDPX1nAl3yp6cs
3	93530026	93987243	93530026	97495593	101	-0.754	93530026	93987243	21	0.1197	http://genome.ucsc.edu/cgi-bin/hgTracks?db=hg19&position=chr3:93480026-94037243&hgsid=443362677_4V80BwZqd7j9QbFDPX1nAl3yp6cs
3	94048337	97495593	93530026	97495593	101	-0.754	94048337	97495593	80	-1.919	http://genome.ucsc.edu/cgi-bin/hgTracks?db=hg19&position=chr3:93998337-97545593&hgsid=443362677_4V80BwZqd7j9QbFDPX1nAl3yp6cs
3	97676264	98567937	97676264	101972295	133	-0.3152	97676264	98567937	23	-0.3495	http://genome.ucsc.edu/cgi-bin/hgTracks?db=hg19&position=chr3:97626264-98617937&hgsid=443362677_4V80BwZqd7j9QbFDPX1nAl3yp6cs
3	98598323	99488687	97676264	101972295	133	-0.3152	98598323	99488687	11	-1.7711	http://genome.ucsc.edu/cgi-bin/hgTracks?db=hg19&position=chr3:98548323-99538687&hgsid=443362677_4V80BwZqd7j9QbFDPX1nAl3yp6cs
3	99559160	101972295	97676264	101972295	133	-0.3152	99559160	115928691	558	-0.0064	http://genome.ucsc.edu/cgi-bin/hgTracks?db=hg19&position=chr3:99509160-102022295&hgsid=443362677_4V80BwZqd7j9QbFDPX1nAl3yp6cs
3	101981567	105043548	101981567	105043548	66	-0.8118	99559160	115928691	558	-0.0064	http://genome.ucsc.edu/cgi-bin/hgTracks?db=hg19&position=chr3:101931567-105093548&hgsid=443362677_4V80BwZqd7j9QbFDPX1nAl3yp6cs
3	105061581	106273350	105061581	106273350	45	-0.2752	99559160	115928691	558	-0.0064	http://genome.ucsc.edu/cgi-bin/hgTracks?db=hg19&position=chr3:105011581-106323350&hgsid=443362677_4V80BwZqd7j9QbFDPX1nAl3yp6cs
3	106307520	106964057	106307520	106964057	27	-1.0949	99559160	115928691	558	-0.0064	http://genome.ucsc.edu/cgi-bin/hgTracks?db=hg19&position=chr3:106257520-107014057&hgsid=443362677_4V80BwZqd7j9QbFDPX1nAl3yp6cs
3	107000570	115928691	107000570	134271138	1002	-0.3564	99559160	115928691	558	-0.0064	http://genome.ucsc.edu/cgi-bin/hgTracks?db=hg19&position=chr3:106950570-115978691&hgsid=443362677_4V80BwZqd7j9QbFDPX1nAl3yp6cs
3	115941675	117895863	107000570	134271138	1002	-0.3564	115941675	117895863	37	-2.2879	http://genome.ucsc.edu/cgi-bin/hgTracks?db=hg19&position=chr3:115891675-117945863&hgsid=443362677_4V80BwZqd7j9QbFDPX1nAl3yp6cs
3	118034480	123636266	107000570	134271138	1002	-0.3564	118034480	123636266	211	-0.0834	http://genome.ucsc.edu/cgi-bin/hgTracks?db=hg19&position=chr3:117984480-123686266&hgsid=443362677_4V80BwZqd7j9QbFDPX1nAl3yp6cs
3	123686842	124075273	107000570	134271138	1002	-0.3564	123686842	124075273	13	-1.8839	http://genome.ucsc.edu/cgi-bin/hgTracks?db=hg19&position=chr3:123636842-124125273&hgsid=443362677_4V80BwZqd7j9QbFDPX1nAl3yp6cs
3	124228148	134271138	107000570	134271138	1002	-0.3564	124228148	137142255	539	-0.2115	http://genome.ucsc.edu/cgi-bin/hgTracks?db=hg19&position=chr3:124178148-134321138&hgsid=443362677_4V80BwZqd7j9QbFDPX1nAl3yp6cs
3	134300610	135773193	134300610	135773193	27	-1.0239	124228148	137142255	539	-0.2115	http://genome.ucsc.edu/cgi-bin/hgTracks?db=hg19&position=chr3:134250610-135823193&hgsid=443362677_4V80BwZqd7j9QbFDPX1nAl3yp6cs
3	135780686	136770715	135780686	136770715	90	-0.0329	124228148	137142255	539	-0.2115	http://genome.ucsc.edu/cgi-bin/hgTracks?db=hg19&position=chr3:135730686-136820715&hgsid=443362677_4V80BwZqd7j9QbFDPX1nAl3yp6cs
3	136839954	137142255	136839954	137846340	20	-1.0276	124228148	137142255	539	-0.2115	http://genome.ucsc.edu/cgi-bin/hgTracks?db=hg19&position=chr3:136789954-137192255&hgsid=443362677_4V80BwZqd7j9QbFDPX1nAl3yp6cs
3	137171862	137666536	136839954	137846340	20	-1.0276	137171862	137666536	11	-2.0234	http://genome.ucsc.edu/cgi-bin/hgTracks?db=hg19&position=chr3:137121862-137716536&hgsid=443362677_4V80BwZqd7j9QbFDPX1nAl3yp6cs
3	137670426	137846340	136839954	137846340	20	-1.0276	137670426	139489173	111	-0.021	http://genome.ucsc.edu/cgi-bin/hgTracks?db=hg19&position=chr3:137620426-137896340&hgsid=443362677_4V80BwZqd7j9QbFDPX1nAl3yp6cs
3	137868566	139489173	137868566	156918284	761	-0.4412	137670426	139489173	111	-0.021	http://genome.ucsc.edu/cgi-bin/hgTracks?db=hg19&position=chr3:137818566-139539173&hgsid=443362677_4V80BwZqd7j9QbFDPX1nAl3yp6cs
3	139527532	140539709	137868566	156918284	761	-0.4412	139527532	140539709	22	-1.8713	http://genome.ucsc.edu/cgi-bin/hgTracks?db=hg19&position=chr3:139477532-140589709&hgsid=443362677_4V80BwZqd7j9QbFDPX1nAl3yp6cs
3	140556643	143765569	137868566	156918284	761	-0.4412	140556643	143765569	174	-0.0982	http://genome.ucsc.edu/cgi-bin/hgTracks?db=hg19&position=chr3:140506643-143815569&hgsid=443362677_4V80BwZqd7j9QbFDPX1nAl3yp6cs
3	143877033	145548937	137868566	156918284	761	-0.4412	143877033	145548937	31	-1.1862	http://genome.ucsc.edu/cgi-bin/hgTracks?db=hg19&position=chr3:143827033-145598937&hgsid=443362677_4V80BwZqd7j9QbFDPX1nAl3yp6cs
3	145569555	156918284	137868566	156918284	761	-0.4412	145569555	168031240	714	0.1466	http://genome.ucsc.edu/cgi-bin/hgTracks?db=hg19&position=chr3:145519555-156968284&hgsid=443362677_4V80BwZqd7j9QbFDPX1nAl3yp6cs
3	156931672	157716047	156931672	157716047	19	-1.2748	145569555	168031240	714	0.1466	http://genome.ucsc.edu/cgi-bin/hgTracks?db=hg19&position=chr3:156881672-157766047&hgsid=443362677_4V80BwZqd7j9QbFDPX1nAl3yp6cs
3	157778460	167953548	157778460	167953548	263	-0.5655	145569555	168031240	714	0.1466	http://genome.ucsc.edu/cgi-bin/hgTracks?db=hg19&position=chr3:157728460-168003548&hgsid=443362677_4V80BwZqd7j9QbFDPX1nAl3yp6cs
3	168008916	168031240	168008916	168570446	16	-0.9338	145569555	168031240	714	0.1466	http://genome.ucsc.edu/cgi-bin/hgTracks?db=hg19&position=chr3:167958916-168081240&hgsid=443362677_4V80BwZqd7j9QbFDPX1nAl3yp6cs
3	168119618	168551094	168008916	168570446	16	-0.9338	168119618	168551094	12	-2.1134	http://genome.ucsc.edu/cgi-bin/hgTracks?db=hg19&position=chr3:168069618-168601094&hgsid=443362677_4V80BwZqd7j9QbFDPX1nAl3yp6cs
3	168559090	168570446	168008916	168570446	16	-0.9338	168559090	169235971	19	-1.0769	http://genome.ucsc.edu/cgi-bin/hgTracks?db=hg19&position=chr3:168509090-168620446&hgsid=443362677_4V80BwZqd7j9QbFDPX1nAl3yp6cs
3	168609292	169235971	168609292	172548250	223	-0.1327	168559090	169235971	19	-1.0769	http://genome.ucsc.edu/cgi-bin/hgTracks?db=hg19&position=chr3:168559292-169285971&hgsid=443362677_4V80BwZqd7j9QbFDPX1nAl3yp6cs
3	169266854	172548250	168609292	172548250	223	-0.1327	169266854	179562542	527	0.141	http://genome.ucsc.edu/cgi-bin/hgTracks?db=hg19&position=chr3:169216854-172598250&hgsid=443362677_4V80BwZqd7j9QbFDPX1nAl3yp6cs
3	172550319	174018937	172550319	174018937	50	-0.8875	169266854	179562542	527	0.141	http://genome.ucsc.edu/cgi-bin/hgTracks?db=hg19&position=chr3:172500319-174068937&hgsid=443362677_4V80BwZqd7j9QbFDPX1nAl3yp6cs
3	174185307	179505482	174185307	179505482	267	-0.35	169266854	179562542	527	0.141	http://genome.ucsc.edu/cgi-bin/hgTracks?db=hg19&position=chr3:174135307-179555482&hgsid=443362677_4V80BwZqd7j9QbFDPX1nAl3yp6cs
3	179526786	179562542	179526786	181555410	84	-0.9162	169266854	179562542	527	0.141	http://genome.ucsc.edu/cgi-bin/hgTracks?db=hg19&position=chr3:179476786-179612542&hgsid=443362677_4V80BwZqd7j9QbFDPX1nAl3yp6cs
3	179637583	181384000	179526786	181555410	84	-0.9162	179637583	181384000	68	-1.5015	http://genome.ucsc.edu/cgi-bin/hgTracks?db=hg19&position=chr3:179587583-181434000&hgsid=443362677_4V80BwZqd7j9QbFDPX1nAl3yp6cs
3	181392040	181555410	179526786	181555410	84	-0.9162	181392040	187238983	493	0.0434	http://genome.ucsc.edu/cgi-bin/hgTracks?db=hg19&position=chr3:181342040-181605410&hgsid=443362677_4V80BwZqd7j9QbFDPX1nAl3yp6cs
3	181564104	186789472	181564104	186789472	461	-0.2233	181392040	187238983	493	0.0434	http://genome.ucsc.edu/cgi-bin/hgTracks?db=hg19&position=chr3:181514104-186839472&hgsid=443362677_4V80BwZqd7j9QbFDPX1nAl3yp6cs
3	186805709	187047291	186805709	187047291	16	-1.2443	181392040	187238983	493	0.0434	http://genome.ucsc.edu/cgi-bin/hgTracks?db=hg19&position=chr3:186755709-187097291&hgsid=443362677_4V80BwZqd7j9QbFDPX1nAl3yp6cs
3	187063833	187238983	187063833	190462866	122	-0.1414	181392040	187238983	493	0.0434	http://genome.ucsc.edu/cgi-bin/hgTracks?db=hg19&position=chr3:187013833-187288983&hgsid=443362677_4V80BwZqd7j9QbFDPX1nAl3yp6cs
3	187246741	187385083	187063833	190462866	122	-0.1414	187246741	187385083	6	-2.2649	http://genome.ucsc.edu/cgi-bin/hgTracks?db=hg19&position=chr3:187196741-187435083&hgsid=443362677_4V80BwZqd7j9QbFDPX1nAl3yp6cs
3	187470511	190462866	187063833	190462866	122	-0.1414	187470511	191908357	170	0.0876	http://genome.ucsc.edu/cgi-bin/hgTracks?db=hg19&position=chr3:187420511-190512866&hgsid=443362677_4V80BwZqd7j9QbFDPX1nAl3yp6cs
3	190468850	191908357	190468850	192432400	71	-0.9488	187470511	191908357	170	0.0876	http://genome.ucsc.edu/cgi-bin/hgTracks?db=hg19&position=chr3:190418850-191958357&hgsid=443362677_4V80BwZqd7j9QbFDPX1nAl3yp6cs
3	191964538	192432400	190468850	192432400	71	-0.9488	191964538	192432400	13	-1.9461	http://genome.ucsc.edu/cgi-bin/hgTracks?db=hg19&position=chr3:191914538-192482400&hgsid=443362677_4V80BwZqd7j9QbFDPX1nAl3yp6cs
3	192556310	192859075	192556310	197887341	479	-0.2088	192556310	192859075	23	-0.2918	http://genome.ucsc.edu/cgi-bin/hgTracks?db=hg19&position=chr3:192506310-192909075&hgsid=443362677_4V80BwZqd7j9QbFDPX1nAl3yp6cs
3	192863463	193235362	192556310	197887341	479	-0.2088	192863463	193235362	14	-1.7951	http://genome.ucsc.edu/cgi-bin/hgTracks?db=hg19&position=chr3:192813463-193285362&hgsid=443362677_4V80BwZqd7j9QbFDPX1nAl3yp6cs
3	193258962	197887341	192556310	197887341	479	-0.2088	193258962	197887341	442	-0.0053	http://genome.ucsc.edu/cgi-bin/hgTracks?db=hg19&position=chr3:193208962-197937341&hgsid=443362677_4V80BwZqd7j9QbFDPX1nAl3yp6cs
4	50401	399858	50401	16647084	671	-0.3189	50401	399858	27	-1.7607	http://genome.ucsc.edu/cgi-bin/hgTracks?db=hg19&position=chr4:401-449858&hgsid=443362677_4V80BwZqd7j9QbFDPX1nAl3yp6cs
4	401257	5055630	50401	16647084	671	-0.3189	401257	5055630	283	0.0372	http://genome.ucsc.edu/cgi-bin/hgTracks?db=hg19&position=chr4:351257-5105630&hgsid=443362677_4V80BwZqd7j9QbFDPX1nAl3yp6cs
4	5061786	5647749	50401	16647084	671	-0.3189	5061786	5647749	16	-2.3048	http://genome.ucsc.edu/cgi-bin/hgTracks?db=hg19&position=chr4:5011786-5697749&hgsid=443362677_4V80BwZqd7j9QbFDPX1nAl3yp6cs
4	5694518	13575240	50401	16647084	671	-0.3189	5694518	13575240	279	-0.2025	http://genome.ucsc.edu/cgi-bin/hgTracks?db=hg19&position=chr4:5644518-13625240&hgsid=443362677_4V80BwZqd7j9QbFDPX1nAl3yp6cs
4	13627869	14639683	50401	16647084	671	-0.3189	13627869	14639683	20	-2.4711	http://genome.ucsc.edu/cgi-bin/hgTracks?db=hg19&position=chr4:13577869-14689683&hgsid=443362677_4V80BwZqd7j9QbFDPX1nAl3yp6cs
4	14830079	16070782	50401	16647084	671	-0.3189	14830079	16070782	38	-0.0423	http://genome.ucsc.edu/cgi-bin/hgTracks?db=hg19&position=chr4:14780079-16120782&hgsid=443362677_4V80BwZqd7j9QbFDPX1nAl3yp6cs
4	16158900	16647084	50401	16647084	671	-0.3189	16158900	17430818	40	-1.566	http://genome.ucsc.edu/cgi-bin/hgTracks?db=hg19&position=chr4:16108900-16697084&hgsid=443362677_4V80BwZqd7j9QbFDPX1nAl3yp6cs
4	16657615	17316128	16657615	17316128	29	-1.1085	16158900	17430818	40	-1.566	http://genome.ucsc.edu/cgi-bin/hgTracks?db=hg19&position=chr4:16607615-17366128&hgsid=443362677_4V80BwZqd7j9QbFDPX1nAl3yp6cs
4	17347675	17430818	17347675	18624118	58	-0.3376	16158900	17430818	40	-1.566	http://genome.ucsc.edu/cgi-bin/hgTracks?db=hg19&position=chr4:17297675-17480818&hgsid=443362677_4V80BwZqd7j9QbFDPX1nAl3yp6cs
4	17432524	18624118	17347675	18624118	58	-0.3376	17432524	20607462	101	-0.4435	http://genome.ucsc.edu/cgi-bin/hgTracks?db=hg19&position=chr4:17382524-18674118&hgsid=443362677_4V80BwZqd7j9QbFDPX1nAl3yp6cs
4	18667451	20607462	18667451	21717952	85	-1.0081	17432524	20607462	101	-0.4435	http://genome.ucsc.edu/cgi-bin/hgTracks?db=hg19&position=chr4:18617451-20657462&hgsid=443362677_4V80BwZqd7j9QbFDPX1nAl3yp6cs
4	20638391	21717952	18667451	21717952	85	-1.0081	20638391	22050515	46	-1.8043	http://genome.ucsc.edu/cgi-bin/hgTracks?db=hg19&position=chr4:20588391-21767952&hgsid=443362677_4V80BwZqd7j9QbFDPX1nAl3yp6cs
4	21788283	22050515	21788283	27173871	207	-0.3117	20638391	22050515	46	-1.8043	http://genome.ucsc.edu/cgi-bin/hgTracks?db=hg19&position=chr4:21738283-22100515&hgsid=443362677_4V80BwZqd7j9QbFDPX1nAl3yp6cs
4	22167990	22622770	21788283	27173871	207	-0.3117	22167990	22622770	14	-0.0677	http://genome.ucsc.edu/cgi-bin/hgTracks?db=hg19&position=chr4:22117990-22672770&hgsid=443362677_4V80BwZqd7j9QbFDPX1nAl3yp6cs
4	22680407	24432672	21788283	27173871	207	-0.3117	22680407	24432672	48	-1.8764	http://genome.ucsc.edu/cgi-bin/hgTracks?db=hg19&position=chr4:22630407-24482672&hgsid=443362677_4V80BwZqd7j9QbFDPX1nAl3yp6cs
4	24517113	27173871	21788283	27173871	207	-0.3117	24517113	42578417	827	0.0438	http://genome.ucsc.edu/cgi-bin/hgTracks?db=hg19&position=chr4:24467113-27223871&hgsid=443362677_4V80BwZqd7j9QbFDPX1nAl3yp6cs
4	27190973	35814926	27190973	35814926	231	-0.9329	24517113	42578417	827	0.0438	http://genome.ucsc.edu/cgi-bin/hgTracks?db=hg19&position=chr4:27140973-35864926&hgsid=443362677_4V80BwZqd7j9QbFDPX1nAl3yp6cs
4	35852735	42578417	35852735	42801547	463	-0.231	24517113	42578417	827	0.0438	http://genome.ucsc.edu/cgi-bin/hgTracks?db=hg19&position=chr4:35802735-42628417&hgsid=443362677_4V80BwZqd7j9QbFDPX1nAl3yp6cs
4	42589716	42801547	35852735	42801547	463	-0.231	42589716	47269736	94	-1.9673	http://genome.ucsc.edu/cgi-bin/hgTracks?db=hg19&position=chr4:42539716-42851547&hgsid=443362677_4V80BwZqd7j9QbFDPX1nAl3yp6cs
4	42844795	47269736	42844795	47418560	95	-0.932	42589716	47269736	94	-1.9673	http://genome.ucsc.edu/cgi-bin/hgTracks?db=hg19&position=chr4:42794795-47319736&hgsid=443362677_4V80BwZqd7j9QbFDPX1nAl3yp6cs
4	47295251	47418560	42844795	47418560	95	-0.932	47295251	49086588	70	-0.1316	http://genome.ucsc.edu/cgi-bin/hgTracks?db=hg19&position=chr4:47245251-47468560&hgsid=443362677_4V80BwZqd7j9QbFDPX1nAl3yp6cs
4	47458188	49086588	47458188	49619217	75	-0.3531	47295251	49086588	70	-0.1316	http://genome.ucsc.edu/cgi-bin/hgTracks?db=hg19&position=chr4:47408188-49136588&hgsid=443362677_4V80BwZqd7j9QbFDPX1nAl3yp6cs
4	49162877	49619217	47458188	49619217	75	-0.3531	49162877	49619217	11	-2.0897	http://genome.ucsc.edu/cgi-bin/hgTracks?db=hg19&position=chr4:49112877-49669217&hgsid=443362677_4V80BwZqd7j9QbFDPX1nAl3yp6cs
4	52747218	55078560	52747218	57880761	236	-0.2965	52747218	55078560	66	-0.3269	http://genome.ucsc.edu/cgi-bin/hgTracks?db=hg19&position=chr4:52697218-55128560&hgsid=443362677_4V80BwZqd7j9QbFDPX1nAl3yp6cs
4	55227237	55477235	52747218	57880761	236	-0.2965	55227237	55477235	8	-2.1433	http://genome.ucsc.edu/cgi-bin/hgTracks?db=hg19&position=chr4:55177237-55527235&hgsid=443362677_4V80BwZqd7j9QbFDPX1nAl3yp6cs
4	55482641	57880761	52747218	57880761	236	-0.2965	55482641	57943536	165	-0.014	http://genome.ucsc.edu/cgi-bin/hgTracks?db=hg19&position=chr4:55432641-57930761&hgsid=443362677_4V80BwZqd7j9QbFDPX1nAl3yp6cs
4	57905156	57943536	57905156	67826209	224	-0.9255	55482641	57943536	165	-0.014	http://genome.ucsc.edu/cgi-bin/hgTracks?db=hg19&position=chr4:57855156-57993536&hgsid=443362677_4V80BwZqd7j9QbFDPX1nAl3yp6cs
4	57956938	67826209	57905156	67826209	224	-0.9255	57956938	68213123	228	-2.0671	http://genome.ucsc.edu/cgi-bin/hgTracks?db=hg19&position=chr4:57906938-67876209&hgsid=443362677_4V80BwZqd7j9QbFDPX1nAl3yp6cs
4	67861649	68213123	67861649	85923738	661	-0.3319	57956938	68213123	228	-2.0671	http://genome.ucsc.edu/cgi-bin/hgTracks?db=hg19&position=chr4:67811649-68263123&hgsid=443362677_4V80BwZqd7j9QbFDPX1nAl3yp6cs
4	68223193	72074072	67861649	85923738	661	-0.3319	68223193	72074072	158	0.0232	http://genome.ucsc.edu/cgi-bin/hgTracks?db=hg19&position=chr4:68173193-72124072&hgsid=443362677_4V80BwZqd7j9QbFDPX1nAl3yp6cs
4	72145605	73880619	67861649	85923738	661	-0.3319	72145605	73880619	36	-1.6156	http://genome.ucsc.edu/cgi-bin/hgTracks?db=hg19&position=chr4:72095605-73930619&hgsid=443362677_4V80BwZqd7j9QbFDPX1nAl3yp6cs
4	73897744	79756707	67861649	85923738	661	-0.3319	73897744	79756707	220	-0.0039	http://genome.ucsc.edu/cgi-bin/hgTracks?db=hg19&position=chr4:73847744-79806707&hgsid=443362677_4V80BwZqd7j9QbFDPX1nAl3yp6cs
4	79962281	83149289	67861649	85923738	661	-0.3319	79962281	83149289	80	-1.2721	http://genome.ucsc.edu/cgi-bin/hgTracks?db=hg19&position=chr4:79912281-83199289&hgsid=443362677_4V80BwZqd7j9QbFDPX1nAl3yp6cs
4	83179976	85923738	67861649	85923738	661	-0.3319	83179976	109722120	914	0.0242	http://genome.ucsc.edu/cgi-bin/hgTracks?db=hg19&position=chr4:83129976-85973738&hgsid=443362677_4V80BwZqd7j9QbFDPX1nAl3yp6cs
4	85932802	86692955	85932802	86692955	24	-1.3053	83179976	109722120	914	0.0242	http://genome.ucsc.edu/cgi-bin/hgTracks?db=hg19&position=chr4:85882802-86742955&hgsid=443362677_4V80BwZqd7j9QbFDPX1nAl3yp6cs
4	86718418	92966538	86718418	92966538	232	-0.2508	83179976	109722120	914	0.0242	http://genome.ucsc.edu/cgi-bin/hgTracks?db=hg19&position=chr4:86668418-93016538&hgsid=443362677_4V80BwZqd7j9QbFDPX1nAl3yp6cs
4	93052715	99121095	93052715	99121095	174	-0.7467	83179976	109722120	914	0.0242	http://genome.ucsc.edu/cgi-bin/hgTracks?db=hg19&position=chr4:93002715-99171095&hgsid=443362677_4V80BwZqd7j9QbFDPX1nAl3yp6cs
4	99137939	109722120	99137939	109722120	324	-0.3443	83179976	109722120	914	0.0242	http://genome.ucsc.edu/cgi-bin/hgTracks?db=hg19&position=chr4:99087939-109772120&hgsid=443362677_4V80BwZqd7j9QbFDPX1nAl3yp6cs
4	109792564	110238947	109792564	110238947	15	-1.2413	109792564	110275150	17	-1.9473	http://genome.ucsc.edu/cgi-bin/hgTracks?db=hg19&position=chr4:109742564-110288947&hgsid=443362677_4V80BwZqd7j9QbFDPX1nAl3yp6cs
4	110252289	110275150	110252289	111116366	57	-0.0205	109792564	110275150	17	-1.9473	http://genome.ucsc.edu/cgi-bin/hgTracks?db=hg19&position=chr4:110202289-110325150&hgsid=443362677_4V80BwZqd7j9QbFDPX1nAl3yp6cs
4	110281833	111116366	110252289	111116366	57	-0.0205	110281833	147428637	1227	0.1077	http://genome.ucsc.edu/cgi-bin/hgTracks?db=hg19&position=chr4:110231833-111166366&hgsid=443362677_4V80BwZqd7j9QbFDPX1nAl3yp6cs
4	111126153	113059317	111126153	113059317	58	-0.6659	110281833	147428637	1227	0.1077	http://genome.ucsc.edu/cgi-bin/hgTracks?db=hg19&position=chr4:111076153-113109317&hgsid=443362677_4V80BwZqd7j9QbFDPX1nAl3yp6cs
4	113064507	113591714	113064507	113591714	29	0.0058	110281833	147428637	1227	0.1077	http://genome.ucsc.edu/cgi-bin/hgTracks?db=hg19&position=chr4:113014507-113641714&hgsid=443362677_4V80BwZqd7j9QbFDPX1nAl3yp6cs
4	113593664	114242981	113593664	114242981	58	-0.8149	110281833	147428637	1227	0.1077	http://genome.ucsc.edu/cgi-bin/hgTracks?db=hg19&position=chr4:113543664-114292981&hgsid=443362677_4V80BwZqd7j9QbFDPX1nAl3yp6cs
4	114263780	115855634	114263780	115855634	45	-0.2518	110281833	147428637	1227	0.1077	http://genome.ucsc.edu/cgi-bin/hgTracks?db=hg19&position=chr4:114213780-115905634&hgsid=443362677_4V80BwZqd7j9QbFDPX1nAl3yp6cs
4	115890394	118984269	115890394	118984269	79	-0.8676	110281833	147428637	1227	0.1077	http://genome.ucsc.edu/cgi-bin/hgTracks?db=hg19&position=chr4:115840394-119034269&hgsid=443362677_4V80BwZqd7j9QbFDPX1nAl3yp6cs
4	119065428	120791605	119065428	120791605	77	-0.2881	110281833	147428637	1227	0.1077	http://genome.ucsc.edu/cgi-bin/hgTracks?db=hg19&position=chr4:119015428-120841605&hgsid=443362677_4V80BwZqd7j9QbFDPX1nAl3yp6cs
4	120802721	123607511	120802721	123607511	87	-0.6968	110281833	147428637	1227	0.1077	http://genome.ucsc.edu/cgi-bin/hgTracks?db=hg19&position=chr4:120752721-123657511&hgsid=443362677_4V80BwZqd7j9QbFDPX1nAl3yp6cs
4	123640067	125720887	123640067	125720887	74	-0.2471	110281833	147428637	1227	0.1077	http://genome.ucsc.edu/cgi-bin/hgTracks?db=hg19&position=chr4:123590067-125770887&hgsid=443362677_4V80BwZqd7j9QbFDPX1nAl3yp6cs
4	125749306	128442031	125749306	128442031	65	-1.0395	110281833	147428637	1227	0.1077	http://genome.ucsc.edu/cgi-bin/hgTracks?db=hg19&position=chr4:125699306-128492031&hgsid=443362677_4V80BwZqd7j9QbFDPX1nAl3yp6cs
4	128491232	130201798	128491232	130201798	110	-0.2311	110281833	147428637	1227	0.1077	http://genome.ucsc.edu/cgi-bin/hgTracks?db=hg19&position=chr4:128441232-130251798&hgsid=443362677_4V80BwZqd7j9QbFDPX1nAl3yp6cs
4	130231140	138851872	130231140	138851872	181	-0.9482	110281833	147428637	1227	0.1077	http://genome.ucsc.edu/cgi-bin/hgTracks?db=hg19&position=chr4:130181140-138901872&hgsid=443362677_4V80BwZqd7j9QbFDPX1nAl3yp6cs
4	138908888	147428637	138908888	154637140	582	-0.2546	110281833	147428637	1227	0.1077	http://genome.ucsc.edu/cgi-bin/hgTracks?db=hg19&position=chr4:138858888-147478637&hgsid=443362677_4V80BwZqd7j9QbFDPX1nAl3yp6cs
4	147471269	148008848	138908888	154637140	582	-0.2546	147471269	148008848	17	-1.7823	http://genome.ucsc.edu/cgi-bin/hgTracks?db=hg19&position=chr4:147421269-148058848&hgsid=443362677_4V80BwZqd7j9QbFDPX1nAl3yp6cs
4	148023646	154637140	138908888	154637140	582	-0.2546	148023646	154734838	261	0.0365	http://genome.ucsc.edu/cgi-bin/hgTracks?db=hg19&position=chr4:147973646-154687140&hgsid=443362677_4V80BwZqd7j9QbFDPX1nAl3yp6cs
4	154665498	154734838	154665498	159017906	107	-1.0261	148023646	154734838	261	0.0365	http://genome.ucsc.edu/cgi-bin/hgTracks?db=hg19&position=chr4:154615498-154784838&hgsid=443362677_4V80BwZqd7j9QbFDPX1nAl3yp6cs
4	154797607	155090858	154665498	159017906	107	-1.0261	154797607	155090858	4	-2.2356	http://genome.ucsc.edu/cgi-bin/hgTracks?db=hg19&position=chr4:154747607-155140858&hgsid=443362677_4V80BwZqd7j9QbFDPX1nAl3yp6cs
4	155181067	159017906	154665498	159017906	107	-1.0261	155181067	174504452	630	0.2021	http://genome.ucsc.edu/cgi-bin/hgTracks?db=hg19&position=chr4:155131067-159067906&hgsid=443362677_4V80BwZqd7j9QbFDPX1nAl3yp6cs
4	159056397	160358491	159056397	160358491	64	-0.2202	155181067	174504452	630	0.2021	http://genome.ucsc.edu/cgi-bin/hgTracks?db=hg19&position=chr4:159006397-160408491&hgsid=443362677_4V80BwZqd7j9QbFDPX1nAl3yp6cs
4	160359119	165616335	160359119	165616335	148	-0.9659	155181067	174504452	630	0.2021	http://genome.ucsc.edu/cgi-bin/hgTracks?db=hg19&position=chr4:160309119-165666335&hgsid=443362677_4V80BwZqd7j9QbFDPX1nAl3yp6cs
4	165660991	165723309	165660991	165723309	8	-0.0399	155181067	174504452	630	0.2021	http://genome.ucsc.edu/cgi-bin/hgTracks?db=hg19&position=chr4:165610991-165773309&hgsid=443362677_4V80BwZqd7j9QbFDPX1nAl3yp6cs
4	165735677	165958568	165735677	165958568	24	-0.8836	155181067	174504452	630	0.2021	http://genome.ucsc.edu/cgi-bin/hgTracks?db=hg19&position=chr4:165685677-166008568&hgsid=443362677_4V80BwZqd7j9QbFDPX1nAl3yp6cs
4	165960874	166401068	165960874	166401068	33	-0.315	155181067	174504452	630	0.2021	http://genome.ucsc.edu/cgi-bin/hgTracks?db=hg19&position=chr4:165910874-166451068&hgsid=443362677_4V80BwZqd7j9QbFDPX1nAl3yp6cs
4	166411709	169014752	166411709	169014752	68	-0.9475	155181067	174504452	630	0.2021	http://genome.ucsc.edu/cgi-bin/hgTracks?db=hg19&position=chr4:166361709-169064752&hgsid=443362677_4V80BwZqd7j9QbFDPX1nAl3yp6cs
4	169102466	171094438	169102466	171094438	102	-0.0894	155181067	174504452	630	0.2021	http://genome.ucsc.edu/cgi-bin/hgTracks?db=hg19&position=chr4:169052466-171144438&hgsid=443362677_4V80BwZqd7j9QbFDPX1nAl3yp6cs
4	171154438	173579225	171154438	173579225	61	-1.0211	155181067	174504452	630	0.2021	http://genome.ucsc.edu/cgi-bin/hgTracks?db=hg19&position=chr4:171104438-173629225&hgsid=443362677_4V80BwZqd7j9QbFDPX1nAl3yp6cs
4	173608703	174504452	173608703	174504452	24	-0.2094	155181067	174504452	630	0.2021	http://genome.ucsc.edu/cgi-bin/hgTracks?db=hg19&position=chr4:173558703-174554452&hgsid=443362677_4V80BwZqd7j9QbFDPX1nAl3yp6cs
4	174630222	174729542	174630222	174729542	3	-2.1137	174630222	175102457	14	-1.6639	http://genome.ucsc.edu/cgi-bin/hgTracks?db=hg19&position=chr4:174580222-174779542&hgsid=443362677_4V80BwZqd7j9QbFDPX1nAl3yp6cs
4	174783082	175102457	174783082	189254532	716	-0.623	174630222	175102457	14	-1.6639	http://genome.ucsc.edu/cgi-bin/hgTracks?db=hg19&position=chr4:174733082-175152457&hgsid=443362677_4V80BwZqd7j9QbFDPX1nAl3yp6cs
4	175190760	181852373	174783082	189254532	716	-0.623	175190760	181852373	233	0.268	http://genome.ucsc.edu/cgi-bin/hgTracks?db=hg19&position=chr4:175140760-181902373&hgsid=443362677_4V80BwZqd7j9QbFDPX1nAl3yp6cs
4	181855363	183698803	174783082	189254532	716	-0.623	181855363	183698803	90	-1.3907	http://genome.ucsc.edu/cgi-bin/hgTracks?db=hg19&position=chr4:181805363-183748803&hgsid=443362677_4V80BwZqd7j9QbFDPX1nAl3yp6cs
4	183742835	189254532	174783082	189254532	716	-0.623	183742835	190291531	442	0.1569	http://genome.ucsc.edu/cgi-bin/hgTracks?db=hg19&position=chr4:183692835-189304532&hgsid=443362677_4V80BwZqd7j9QbFDPX1nAl3yp6cs
4	189259180	190291531	189259180	190721126	71	-1.1764	183742835	190291531	442	0.1569	http://genome.ucsc.edu/cgi-bin/hgTracks?db=hg19&position=chr4:189209180-190341531&hgsid=443362677_4V80BwZqd7j9QbFDPX1nAl3yp6cs
4	190377766	190721126	189259180	190721126	71	-1.1764	190377766	190974285	20	-1.0772	http://genome.ucsc.edu/cgi-bin/hgTracks?db=hg19&position=chr4:190327766-190771126&hgsid=443362677_4V80BwZqd7j9QbFDPX1nAl3yp6cs
4	190766057	190974285	190766057	190974285	9	-0.4025	190377766	190974285	20	-1.0772	http://genome.ucsc.edu/cgi-bin/hgTracks?db=hg19&position=chr4:190716057-191024285&hgsid=443362677_4V80BwZqd7j9QbFDPX1nAl3yp6cs
5	28689	1728837	28689	8780979	230	-0.8066	28689	1728837	51	-0.1213	http://genome.ucsc.edu/cgi-bin/hgTracks?db=hg19&position=chr5:-21311-1778837&hgsid=443362677_4V80BwZqd7j9QbFDPX1nAl3yp6cs
5	1757158	4158498	28689	8780979	230	-0.8066	1757158	4158498	53	-2.0044	http://genome.ucsc.edu/cgi-bin/hgTracks?db=hg19&position=chr5:1707158-4208498&hgsid=443362677_4V80BwZqd7j9QbFDPX1nAl3yp6cs
5	4195631	5691630	28689	8780979	230	-0.8066	4195631	5691630	40	-1.1413	http://genome.ucsc.edu/cgi-bin/hgTracks?db=hg19&position=chr5:4145631-5741630&hgsid=443362677_4V80BwZqd7j9QbFDPX1nAl3yp6cs
5	5732034	6464178	28689	8780979	230	-0.8066	5732034	6464178	17	-2.4972	http://genome.ucsc.edu/cgi-bin/hgTracks?db=hg19&position=chr5:5682034-6514178&hgsid=443362677_4V80BwZqd7j9QbFDPX1nAl3yp6cs
5	6510164	6767492	28689	8780979	230	-0.8066	6510164	6767492	9	0.1993	http://genome.ucsc.edu/cgi-bin/hgTracks?db=hg19&position=chr5:6460164-6817492&hgsid=443362677_4V80BwZqd7j9QbFDPX1nAl3yp6cs
5	6986330	8780979	28689	8780979	230	-0.8066	6986330	9899673	85	-1.6994	http://genome.ucsc.edu/cgi-bin/hgTracks?db=hg19&position=chr5:6936330-8830979&hgsid=443362677_4V80BwZqd7j9QbFDPX1nAl3yp6cs
5	8835246	9707719	8835246	9707719	22	0.1195	6986330	9899673	85	-1.6994	http://genome.ucsc.edu/cgi-bin/hgTracks?db=hg19&position=chr5:8785246-9757719&hgsid=443362677_4V80BwZqd7j9QbFDPX1nAl3yp6cs
5	9718164	9899673	9718164	13795000	115	-0.9663	6986330	9899673	85	-1.6994	http://genome.ucsc.edu/cgi-bin/hgTracks?db=hg19&position=chr5:9668164-9949673&hgsid=443362677_4V80BwZqd7j9QbFDPX1nAl3yp6cs
5	9900825	10939296	9718164	13795000	115	-0.9663	9900825	10939296	51	-0.1279	http://genome.ucsc.edu/cgi-bin/hgTracks?db=hg19&position=chr5:9850825-10989296&hgsid=443362677_4V80BwZqd7j9QbFDPX1nAl3yp6cs
5	10942494	13795000	9718164	13795000	115	-0.9663	10942494	13846032	64	-2.2249	http://genome.ucsc.edu/cgi-bin/hgTracks?db=hg19&position=chr5:10892494-13845000&hgsid=443362677_4V80BwZqd7j9QbFDPX1nAl3yp6cs
5	13798968	13846032	13798968	15470779	63	-0.317	10942494	13846032	64	-2.2249	http://genome.ucsc.edu/cgi-bin/hgTracks?db=hg19&position=chr5:13748968-13896032&hgsid=443362677_4V80BwZqd7j9QbFDPX1nAl3yp6cs
5	13855410	15207959	13798968	15470779	63	-0.317	13855410	15207959	56	-0.052	http://genome.ucsc.edu/cgi-bin/hgTracks?db=hg19&position=chr5:13805410-15257959&hgsid=443362677_4V80BwZqd7j9QbFDPX1nAl3yp6cs
5	15208314	15470779	13798968	15470779	63	-0.317	15208314	16394625	28	-2.2235	http://genome.ucsc.edu/cgi-bin/hgTracks?db=hg19&position=chr5:15158314-15520779&hgsid=443362677_4V80BwZqd7j9QbFDPX1nAl3yp6cs
5	15517228	16063629	15517228	16063629	19	-1.285	15208314	16394625	28	-2.2235	http://genome.ucsc.edu/cgi-bin/hgTracks?db=hg19&position=chr5:15467228-16113629&hgsid=443362677_4V80BwZqd7j9QbFDPX1nAl3yp6cs
5	16085973	16394625	16085973	17267720	96	-0.2458	15208314	16394625	28	-2.2235	http://genome.ucsc.edu/cgi-bin/hgTracks?db=hg19&position=chr5:16035973-16444625&hgsid=443362677_4V80BwZqd7j9QbFDPX1nAl3yp6cs
5	16454521	17143226	16085973	17267720	96	-0.2458	16454521	17143226	78	0.2446	http://genome.ucsc.edu/cgi-bin/hgTracks?db=hg19&position=chr5:16404521-17193226&hgsid=443362677_4V80BwZqd7j9QbFDPX1nAl3yp6cs
5	17145690	17267720	16085973	17267720	96	-0.2458	17145690	31326891	462	-1.8286	http://genome.ucsc.edu/cgi-bin/hgTracks?db=hg19&position=chr5:17095690-17317720&hgsid=443362677_4V80BwZqd7j9QbFDPX1nAl3yp6cs
5	17295428	31326891	17295428	32080378	517	-0.9228	17145690	31326891	462	-1.8286	http://genome.ucsc.edu/cgi-bin/hgTracks?db=hg19&position=chr5:17245428-31376891&hgsid=443362677_4V80BwZqd7j9QbFDPX1nAl3yp6cs
5	31375700	32080378	17295428	32080378	517	-0.9228	31375700	35030537	209	-0.24	http://genome.ucsc.edu/cgi-bin/hgTracks?db=hg19&position=chr5:31325700-32130378&hgsid=443362677_4V80BwZqd7j9QbFDPX1nAl3yp6cs
5	32098288	32466797	32098288	32466797	40	-0.2852	31375700	35030537	209	-0.24	http://genome.ucsc.edu/cgi-bin/hgTracks?db=hg19&position=chr5:32048288-32516797&hgsid=443362677_4V80BwZqd7j9QbFDPX1nAl3yp6cs
5	32480879	33966638	32480879	33966638	46	-0.8164	31375700	35030537	209	-0.24	http://genome.ucsc.edu/cgi-bin/hgTracks?db=hg19&position=chr5:32430879-34016638&hgsid=443362677_4V80BwZqd7j9QbFDPX1nAl3yp6cs
5	34028170	35030537	34028170	35649040	75	-0.3074	31375700	35030537	209	-0.24	http://genome.ucsc.edu/cgi-bin/hgTracks?db=hg19&position=chr5:33978170-35080537&hgsid=443362677_4V80BwZqd7j9QbFDPX1nAl3yp6cs
5	35045965	35649040	34028170	35649040	75	-0.3074	35045965	36034372	35	-1.4291	http://genome.ucsc.edu/cgi-bin/hgTracks?db=hg19&position=chr5:34995965-35699040&hgsid=443362677_4V80BwZqd7j9QbFDPX1nAl3yp6cs
5	35676755	36034372	35676755	37218006	53	-0.8781	35045965	36034372	35	-1.4291	http://genome.ucsc.edu/cgi-bin/hgTracks?db=hg19&position=chr5:35626755-36084372&hgsid=443362677_4V80BwZqd7j9QbFDPX1nAl3yp6cs
5	36120253	37218006	35676755	37218006	53	-0.8781	36120253	40974610	191	-0.1223	http://genome.ucsc.edu/cgi-bin/hgTracks?db=hg19&position=chr5:36070253-37268006&hgsid=443362677_4V80BwZqd7j9QbFDPX1nAl3yp6cs
5	37230202	37759636	37230202	37759636	51	-0.1737	36120253	40974610	191	-0.1223	http://genome.ucsc.edu/cgi-bin/hgTracks?db=hg19&position=chr5:37180202-37809636&hgsid=443362677_4V80BwZqd7j9QbFDPX1nAl3yp6cs
5	37792363	38565782	37792363	38565782	19	-1.3014	36120253	40974610	191	-0.1223	http://genome.ucsc.edu/cgi-bin/hgTracks?db=hg19&position=chr5:37742363-38615782&hgsid=443362677_4V80BwZqd7j9QbFDPX1nAl3yp6cs
5	38578746	40974610	38578746	46164323	235	-0.5053	36120253	40974610	191	-0.1223	http://genome.ucsc.edu/cgi-bin/hgTracks?db=hg19&position=chr5:38528746-41024610&hgsid=443362677_4V80BwZqd7j9QbFDPX1nAl3yp6cs
5	41150913	42681962	38578746	46164323	235	-0.5053	41150913	42681962	37	-1.4196	http://genome.ucsc.edu/cgi-bin/hgTracks?db=hg19&position=chr5:41100913-42731962&hgsid=443362677_4V80BwZqd7j9QbFDPX1nAl3yp6cs
5	42756210	46164323	38578746	46164323	235	-0.5053	42756210	46164323	115	-0.1593	http://genome.ucsc.edu/cgi-bin/hgTracks?db=hg19&position=chr5:42706210-46214323&hgsid=443362677_4V80BwZqd7j9QbFDPX1nAl3yp6cs
5	49486520	50242834	49486520	82457910	1345	-0.3264	49486520	50242834	14	-0.0852	http://genome.ucsc.edu/cgi-bin/hgTracks?db=hg19&position=chr5:49436520-50292834&hgsid=443362677_4V80BwZqd7j9QbFDPX1nAl3yp6cs
5	50348760	51623631	49486520	82457910	1345	-0.3264	50348760	51623631	33	-1.4685	http://genome.ucsc.edu/cgi-bin/hgTracks?db=hg19&position=chr5:50298760-51673631&hgsid=443362677_4V80BwZqd7j9QbFDPX1nAl3yp6cs
5	51661441	58197407	49486520	82457910	1345	-0.3264	51661441	58197407	309	-0.1178	http://genome.ucsc.edu/cgi-bin/hgTracks?db=hg19&position=chr5:51611441-58247407&hgsid=443362677_4V80BwZqd7j9QbFDPX1nAl3yp6cs
5	58210875	59839576	49486520	82457910	1345	-0.3264	58210875	59839576	29	-1.3225	http://genome.ucsc.edu/cgi-bin/hgTracks?db=hg19&position=chr5:58160875-59889576&hgsid=443362677_4V80BwZqd7j9QbFDPX1nAl3yp6cs
5	59849219	61000637	49486520	82457910	1345	-0.3264	59849219	61000637	39	-0.1566	http://genome.ucsc.edu/cgi-bin/hgTracks?db=hg19&position=chr5:59799219-61050637&hgsid=443362677_4V80BwZqd7j9QbFDPX1nAl3yp6cs
5	61118166	61476664	49486520	82457910	1345	-0.3264	61118166	61476664	6	-2.3123	http://genome.ucsc.edu/cgi-bin/hgTracks?db=hg19&position=chr5:61068166-61526664&hgsid=443362677_4V80BwZqd7j9QbFDPX1nAl3yp6cs
5	61542477	62081212	49486520	82457910	1345	-0.3264	61542477	62081212	42	-0.2622	http://genome.ucsc.edu/cgi-bin/hgTracks?db=hg19&position=chr5:61492477-62131212&hgsid=443362677_4V80BwZqd7j9QbFDPX1nAl3yp6cs
5	62109899	63817177	49486520	82457910	1345	-0.3264	62109899	63817177	37	-2.0753	http://genome.ucsc.edu/cgi-bin/hgTracks?db=hg19&position=chr5:62059899-63867177&hgsid=443362677_4V80BwZqd7j9QbFDPX1nAl3yp6cs
5	63824562	65536889	49486520	82457910	1345	-0.3264	63824562	65536889	93	-0.1042	http://genome.ucsc.edu/cgi-bin/hgTracks?db=hg19&position=chr5:63774562-65586889&hgsid=443362677_4V80BwZqd7j9QbFDPX1nAl3yp6cs
5	65575758	67376158	49486520	82457910	1345	-0.3264	65575758	67376158	37	-1.3701	http://genome.ucsc.edu/cgi-bin/hgTracks?db=hg19&position=chr5:65525758-67426158&hgsid=443362677_4V80BwZqd7j9QbFDPX1nAl3yp6cs
5	67377863	75037683	49486520	82457910	1345	-0.3264	67377863	75037683	332	-0.0151	http://genome.ucsc.edu/cgi-bin/hgTracks?db=hg19&position=chr5:67327863-75087683&hgsid=443362677_4V80BwZqd7j9QbFDPX1nAl3yp6cs
5	75043763	75652626	49486520	82457910	1345	-0.3264	75043763	75652626	17	-1.3165	http://genome.ucsc.edu/cgi-bin/hgTracks?db=hg19&position=chr5:74993763-75702626&hgsid=443362677_4V80BwZqd7j9QbFDPX1nAl3yp6cs
5	75658998	82457910	49486520	82457910	1345	-0.3264	75658998	96804879	748	-0.0339	http://genome.ucsc.edu/cgi-bin/hgTracks?db=hg19&position=chr5:75608998-82507910&hgsid=443362677_4V80BwZqd7j9QbFDPX1nAl3yp6cs
5	82547267	85900853	82547267	85900853	81	-1.0201	75658998	96804879	748	-0.0339	http://genome.ucsc.edu/cgi-bin/hgTracks?db=hg19&position=chr5:82497267-85950853&hgsid=443362677_4V80BwZqd7j9QbFDPX1nAl3yp6cs
5	85911885	96804879	85911885	122196384	959	-0.5114	75658998	96804879	748	-0.0339	http://genome.ucsc.edu/cgi-bin/hgTracks?db=hg19&position=chr5:85861885-96854879&hgsid=443362677_4V80BwZqd7j9QbFDPX1nAl3yp6cs
5	96839398	97904799	85911885	122196384	959	-0.5114	96839398	97904799	19	-1.7016	http://genome.ucsc.edu/cgi-bin/hgTracks?db=hg19&position=chr5:96789398-97954799&hgsid=443362677_4V80BwZqd7j9QbFDPX1nAl3yp6cs
5	98055825	98339672	85911885	122196384	959	-0.5114	98055825	98339672	18	0.206	http://genome.ucsc.edu/cgi-bin/hgTracks?db=hg19&position=chr5:98005825-98389672&hgsid=443362677_4V80BwZqd7j9QbFDPX1nAl3yp6cs
5	98361883	98420592	85911885	122196384	959	-0.5114	98361883	98420592	5	1.9601	http://genome.ucsc.edu/cgi-bin/hgTracks?db=hg19&position=chr5:98311883-98470592&hgsid=443362677_4V80BwZqd7j9QbFDPX1nAl3yp6cs
5	98426806	98798703	85911885	122196384	959	-0.5114	98426806	98798703	8	-1.3393	http://genome.ucsc.edu/cgi-bin/hgTracks?db=hg19&position=chr5:98376806-98848703&hgsid=443362677_4V80BwZqd7j9QbFDPX1nAl3yp6cs
5	98866574	109379655	85911885	122196384	959	-0.5114	98866574	109379655	261	0.0584	http://genome.ucsc.edu/cgi-bin/hgTracks?db=hg19&position=chr5:98816574-109429655&hgsid=443362677_4V80BwZqd7j9QbFDPX1nAl3yp6cs
5	109501703	110016022	85911885	122196384	959	-0.5114	109501703	110016022	7	-1.7906	http://genome.ucsc.edu/cgi-bin/hgTracks?db=hg19&position=chr5:109451703-110066022&hgsid=443362677_4V80BwZqd7j9QbFDPX1nAl3yp6cs
5	110047727	112897258	85911885	122196384	959	-0.5114	110047727	112897258	87	-0.1897	http://genome.ucsc.edu/cgi-bin/hgTracks?db=hg19&position=chr5:109997727-112947258&hgsid=443362677_4V80BwZqd7j9QbFDPX1nAl3yp6cs
[truncated: 1,072 more rows]

## Sheet:  HCT116
chrom	loc.start	loc.end	num.mark	seg.mean	SIZE	UCSC GB view
[truncated: 991 more rows]

## Sheet: DKO
chrom	loc.start	loc.end	num.mark	seg.mean	UCSC GB view
[truncated: 91 more rows]

## Sheet:  CaCo2
chrom	loc.start	loc.end	num.mark	seg.mean	UCSC GB view
[truncated: 1,753 more rows]

## Sheet: SW480
chrom	loc.start	loc.end	num.mark	seg.mean
[truncated: 374 more rows]

[truncated: 3 more sheets: LoVo, HT29, links]
