# Supplementary material for: The epigenetic landscape of Alu repeats delineates the structural and functional genomic architecture of colon cancer cells
Source: HighWire-hosted journal article supplement (doi:10.1101/gr.207522.116), 2016-12-20
Supplement: Supplemental_Data_S7.xlsx [file Supplemental_Data_S7.xlsx]

## Sheet: Description
Supplemental Data S7. Hypomethylated Alu regions (HMAR) detected in WGBS data.
Sheet's names identify the sample(s) considered in the analysis.
The chromosome segments were obtained by applying theDNAcopy R package to the differential DNA methylation values of Alu repeats analyzed by WGBS (see Material and Methods)
WGBS data were obtained from Hansen et al., Nat Genet 43: 768-775, 2011.
Mireia Jordà et al.
Fields	description
chrom	chromosome
loc.start	segment start position
loc.end	segment end position
num.mark	number of informative marks (NSUMA canonical ALU amplicons) per segment
seg.mean	mean of the log2((number of normalized reads in the normal tissue+1)/(number of normalized reads in the tumor tissue+1)) of all canonical amplicons within the segment
UCSC GB view	direct link to the segment in UCSC genome browser

## Sheet: all cancers
chr	loc.start	loc.end	num.mark	seg.mean	UCSC GB view
1	705685	30119748	2258	-0.0396	http://genome.ucsc.edu/cgi-bin/hgTracks?db=hg19&position=chr1:655685-30169748&hgsid=443358811_uawFxZ8D0XFx7YCAwxfiOv0gYN64
1	30390358	31242737	17	-0.2433	http://genome.ucsc.edu/cgi-bin/hgTracks?db=hg19&position=chr1:30340358-31292737&hgsid=443358811_uawFxZ8D0XFx7YCAwxfiOv0gYN64
1	31248775	36977426	415	-0.0344	http://genome.ucsc.edu/cgi-bin/hgTracks?db=hg19&position=chr1:31198775-37027426&hgsid=443358811_uawFxZ8D0XFx7YCAwxfiOv0gYN64
1	37013494	37368399	8	-0.3192	http://genome.ucsc.edu/cgi-bin/hgTracks?db=hg19&position=chr1:36963494-37418399&hgsid=443358811_uawFxZ8D0XFx7YCAwxfiOv0gYN64
1	37440890	55672554	1019	-0.0364	http://genome.ucsc.edu/cgi-bin/hgTracks?db=hg19&position=chr1:37390890-55722554&hgsid=443358811_uawFxZ8D0XFx7YCAwxfiOv0gYN64
1	55689773	59110776	60	-0.1431	http://genome.ucsc.edu/cgi-bin/hgTracks?db=hg19&position=chr1:55639773-59160776&hgsid=443358811_uawFxZ8D0XFx7YCAwxfiOv0gYN64
1	59141809	63141172	145	-0.01	http://genome.ucsc.edu/cgi-bin/hgTracks?db=hg19&position=chr1:59091809-63191172&hgsid=443358811_uawFxZ8D0XFx7YCAwxfiOv0gYN64
1	63149334	64575271	53	-0.1523	http://genome.ucsc.edu/cgi-bin/hgTracks?db=hg19&position=chr1:63099334-64625271&hgsid=443358811_uawFxZ8D0XFx7YCAwxfiOv0gYN64
1	64703805	70942894	203	-0.057	http://genome.ucsc.edu/cgi-bin/hgTracks?db=hg19&position=chr1:64653805-70992894&hgsid=443358811_uawFxZ8D0XFx7YCAwxfiOv0gYN64
1	70955538	78015633	106	-0.1509	http://genome.ucsc.edu/cgi-bin/hgTracks?db=hg19&position=chr1:70905538-78065633&hgsid=443358811_uawFxZ8D0XFx7YCAwxfiOv0gYN64
1	78027211	79396133	60	-0.0184	http://genome.ucsc.edu/cgi-bin/hgTracks?db=hg19&position=chr1:77977211-79446133&hgsid=443358811_uawFxZ8D0XFx7YCAwxfiOv0gYN64
1	79464045	84596759	99	-0.1953	http://genome.ucsc.edu/cgi-bin/hgTracks?db=hg19&position=chr1:79414045-84646759&hgsid=443358811_uawFxZ8D0XFx7YCAwxfiOv0gYN64
1	84608847	101570540	524	-0.0511	http://genome.ucsc.edu/cgi-bin/hgTracks?db=hg19&position=chr1:84558847-101620540&hgsid=443358811_uawFxZ8D0XFx7YCAwxfiOv0gYN64
1	101642090	109246167	148	-0.1675	http://genome.ucsc.edu/cgi-bin/hgTracks?db=hg19&position=chr1:101592090-109296167&hgsid=443358811_uawFxZ8D0XFx7YCAwxfiOv0gYN64
1	109282941	121159262	388	-0.0405	http://genome.ucsc.edu/cgi-bin/hgTracks?db=hg19&position=chr1:109232941-121209262&hgsid=443358811_uawFxZ8D0XFx7YCAwxfiOv0gYN64
1	142646941	186341403	1757	-0.042	http://genome.ucsc.edu/cgi-bin/hgTracks?db=hg19&position=chr1:142596941-186391403&hgsid=443358811_uawFxZ8D0XFx7YCAwxfiOv0gYN64
1	186358928	190538833	122	-0.2037	http://genome.ucsc.edu/cgi-bin/hgTracks?db=hg19&position=chr1:186308928-190588833&hgsid=443358811_uawFxZ8D0XFx7YCAwxfiOv0gYN64
1	190567163	199936936	237	-0.1195	http://genome.ucsc.edu/cgi-bin/hgTracks?db=hg19&position=chr1:190517163-199986936&hgsid=443358811_uawFxZ8D0XFx7YCAwxfiOv0gYN64
1	199937608	247542476	2146	-0.0556	http://genome.ucsc.edu/cgi-bin/hgTracks?db=hg19&position=chr1:199887608-247592476&hgsid=443358811_uawFxZ8D0XFx7YCAwxfiOv0gYN64
1	247562254	249129826	46	-0.1533	http://genome.ucsc.edu/cgi-bin/hgTracks?db=hg19&position=chr1:247512254-249179826&hgsid=443358811_uawFxZ8D0XFx7YCAwxfiOv0gYN64
1	249133550	249177775	7	0.031	http://genome.ucsc.edu/cgi-bin/hgTracks?db=hg19&position=chr1:249083550-249227775&hgsid=443358811_uawFxZ8D0XFx7YCAwxfiOv0gYN64
2	13950	3140386	47	-0.138	http://genome.ucsc.edu/cgi-bin/hgTracks?db=hg19&position=chr2:-36050-3190386&hgsid=443358811_uawFxZ8D0XFx7YCAwxfiOv0gYN64
2	3171458	3622267	25	0.0068	http://genome.ucsc.edu/cgi-bin/hgTracks?db=hg19&position=chr2:3121458-3672267&hgsid=443358811_uawFxZ8D0XFx7YCAwxfiOv0gYN64
2	3624355	7820335	85	-0.1948	http://genome.ucsc.edu/cgi-bin/hgTracks?db=hg19&position=chr2:3574355-7870335&hgsid=443358811_uawFxZ8D0XFx7YCAwxfiOv0gYN64
2	7846360	11607537	229	-0.0199	http://genome.ucsc.edu/cgi-bin/hgTracks?db=hg19&position=chr2:7796360-11657537&hgsid=443358811_uawFxZ8D0XFx7YCAwxfiOv0gYN64
2	11624606	11636982	3	-0.4067	http://genome.ucsc.edu/cgi-bin/hgTracks?db=hg19&position=chr2:11574606-11686982&hgsid=443358811_uawFxZ8D0XFx7YCAwxfiOv0gYN64
2	11645687	13901269	59	-0.1347	http://genome.ucsc.edu/cgi-bin/hgTracks?db=hg19&position=chr2:11595687-13951269&hgsid=443358811_uawFxZ8D0XFx7YCAwxfiOv0gYN64
2	13916956	14380566	9	-0.3274	http://genome.ucsc.edu/cgi-bin/hgTracks?db=hg19&position=chr2:13866956-14430566&hgsid=443358811_uawFxZ8D0XFx7YCAwxfiOv0gYN64
2	14498581	21051854	182	-0.0742	http://genome.ucsc.edu/cgi-bin/hgTracks?db=hg19&position=chr2:14448581-21101854&hgsid=443358811_uawFxZ8D0XFx7YCAwxfiOv0gYN64
2	21055239	23614303	49	-0.1787	http://genome.ucsc.edu/cgi-bin/hgTracks?db=hg19&position=chr2:21005239-23664303&hgsid=443358811_uawFxZ8D0XFx7YCAwxfiOv0gYN64
2	23623419	34241422	739	-0.0372	http://genome.ucsc.edu/cgi-bin/hgTracks?db=hg19&position=chr2:23573419-34291422&hgsid=443358811_uawFxZ8D0XFx7YCAwxfiOv0gYN64
2	34246476	36356535	47	-0.1367	http://genome.ucsc.edu/cgi-bin/hgTracks?db=hg19&position=chr2:34196476-36406535&hgsid=443358811_uawFxZ8D0XFx7YCAwxfiOv0gYN64
2	36373686	40975446	227	-0.0206	http://genome.ucsc.edu/cgi-bin/hgTracks?db=hg19&position=chr2:36323686-41025446&hgsid=443358811_uawFxZ8D0XFx7YCAwxfiOv0gYN64
2	41033221	42080237	19	-0.22	http://genome.ucsc.edu/cgi-bin/hgTracks?db=hg19&position=chr2:40983221-42130237&hgsid=443358811_uawFxZ8D0XFx7YCAwxfiOv0gYN64
2	42099046	75253890	1477	-0.056	http://genome.ucsc.edu/cgi-bin/hgTracks?db=hg19&position=chr2:42049046-75303890&hgsid=443358811_uawFxZ8D0XFx7YCAwxfiOv0gYN64
2	75364570	84802734	193	-0.1456	http://genome.ucsc.edu/cgi-bin/hgTracks?db=hg19&position=chr2:75314570-84852734&hgsid=443358811_uawFxZ8D0XFx7YCAwxfiOv0gYN64
2	84853723	88305665	167	-0.0516	http://genome.ucsc.edu/cgi-bin/hgTracks?db=hg19&position=chr2:84803723-88355665&hgsid=443358811_uawFxZ8D0XFx7YCAwxfiOv0gYN64
2	88311248	92199980	75	-0.1193	http://genome.ucsc.edu/cgi-bin/hgTracks?db=hg19&position=chr2:88261248-92249980&hgsid=443358811_uawFxZ8D0XFx7YCAwxfiOv0gYN64
2	95528604	95744589	9	-0.2419	http://genome.ucsc.edu/cgi-bin/hgTracks?db=hg19&position=chr2:95478604-95794589&hgsid=443358811_uawFxZ8D0XFx7YCAwxfiOv0gYN64
2	95780000	100197075	191	-0.0312	http://genome.ucsc.edu/cgi-bin/hgTracks?db=hg19&position=chr2:95730000-100247075&hgsid=443358811_uawFxZ8D0XFx7YCAwxfiOv0gYN64
2	100200149	101122802	35	-0.2243	http://genome.ucsc.edu/cgi-bin/hgTracks?db=hg19&position=chr2:100150149-101172802&hgsid=443358811_uawFxZ8D0XFx7YCAwxfiOv0gYN64
2	101153841	103398483	108	-0.0331	http://genome.ucsc.edu/cgi-bin/hgTracks?db=hg19&position=chr2:101103841-103448483&hgsid=443358811_uawFxZ8D0XFx7YCAwxfiOv0gYN64
2	103588939	105550405	46	-0.2022	http://genome.ucsc.edu/cgi-bin/hgTracks?db=hg19&position=chr2:103538939-105600405&hgsid=443358811_uawFxZ8D0XFx7YCAwxfiOv0gYN64
2	105555396	115419530	319	-0.0454	http://genome.ucsc.edu/cgi-bin/hgTracks?db=hg19&position=chr2:105505396-115469530&hgsid=443358811_uawFxZ8D0XFx7YCAwxfiOv0gYN64
2	115471286	119748831	77	-0.1554	http://genome.ucsc.edu/cgi-bin/hgTracks?db=hg19&position=chr2:115421286-119798831&hgsid=443358811_uawFxZ8D0XFx7YCAwxfiOv0gYN64
2	119884716	122824905	167	-0.0451	http://genome.ucsc.edu/cgi-bin/hgTracks?db=hg19&position=chr2:119834716-122874905&hgsid=443358811_uawFxZ8D0XFx7YCAwxfiOv0gYN64
2	122832714	125287607	50	-0.1708	http://genome.ucsc.edu/cgi-bin/hgTracks?db=hg19&position=chr2:122782714-125337607&hgsid=443358811_uawFxZ8D0XFx7YCAwxfiOv0gYN64
2	125326341	132272419	282	-0.0715	http://genome.ucsc.edu/cgi-bin/hgTracks?db=hg19&position=chr2:125276341-132322419&hgsid=443358811_uawFxZ8D0XFx7YCAwxfiOv0gYN64
2	132284658	135798909	87	-0.1315	http://genome.ucsc.edu/cgi-bin/hgTracks?db=hg19&position=chr2:132234658-135848909&hgsid=443358811_uawFxZ8D0XFx7YCAwxfiOv0gYN64
2	135808785	136888894	92	-0.0116	http://genome.ucsc.edu/cgi-bin/hgTracks?db=hg19&position=chr2:135758785-136938894&hgsid=443358811_uawFxZ8D0XFx7YCAwxfiOv0gYN64
2	136892419	147977205	192	-0.1637	http://genome.ucsc.edu/cgi-bin/hgTracks?db=hg19&position=chr2:136842419-148027205&hgsid=443358811_uawFxZ8D0XFx7YCAwxfiOv0gYN64
2	148012368	153610214	181	-0.0403	http://genome.ucsc.edu/cgi-bin/hgTracks?db=hg19&position=chr2:147962368-153660214&hgsid=443358811_uawFxZ8D0XFx7YCAwxfiOv0gYN64
2	153677969	156431950	45	-0.2293	http://genome.ucsc.edu/cgi-bin/hgTracks?db=hg19&position=chr2:153627969-156481950&hgsid=443358811_uawFxZ8D0XFx7YCAwxfiOv0gYN64
2	156463519	162139176	185	-0.0485	http://genome.ucsc.edu/cgi-bin/hgTracks?db=hg19&position=chr2:156413519-162189176&hgsid=443358811_uawFxZ8D0XFx7YCAwxfiOv0gYN64
2	162149929	168227193	129	-0.1559	http://genome.ucsc.edu/cgi-bin/hgTracks?db=hg19&position=chr2:162099929-168277193&hgsid=443358811_uawFxZ8D0XFx7YCAwxfiOv0gYN64
2	168282784	187510414	586	-0.0667	http://genome.ucsc.edu/cgi-bin/hgTracks?db=hg19&position=chr2:168232784-187560414&hgsid=443358811_uawFxZ8D0XFx7YCAwxfiOv0gYN64
2	187562029	190052415	64	-0.2018	http://genome.ucsc.edu/cgi-bin/hgTracks?db=hg19&position=chr2:187512029-190102415&hgsid=443358811_uawFxZ8D0XFx7YCAwxfiOv0gYN64
2	190229131	192432566	72	-0.0375	http://genome.ucsc.edu/cgi-bin/hgTracks?db=hg19&position=chr2:190179131-192482566&hgsid=443358811_uawFxZ8D0XFx7YCAwxfiOv0gYN64
2	192452084	195971465	66	-0.1497	http://genome.ucsc.edu/cgi-bin/hgTracks?db=hg19&position=chr2:192402084-196021465&hgsid=443358811_uawFxZ8D0XFx7YCAwxfiOv0gYN64
2	196151242	209178306	673	-0.0384	http://genome.ucsc.edu/cgi-bin/hgTracks?db=hg19&position=chr2:196101242-209228306&hgsid=443358811_uawFxZ8D0XFx7YCAwxfiOv0gYN64
2	209186290	219022484	256	-0.1223	http://genome.ucsc.edu/cgi-bin/hgTracks?db=hg19&position=chr2:209136290-219072484&hgsid=443358811_uawFxZ8D0XFx7YCAwxfiOv0gYN64
2	219079516	219808627	72	-0.0191	http://genome.ucsc.edu/cgi-bin/hgTracks?db=hg19&position=chr2:219029516-219858627&hgsid=443358811_uawFxZ8D0XFx7YCAwxfiOv0gYN64
2	219811182	223143679	88	-0.153	http://genome.ucsc.edu/cgi-bin/hgTracks?db=hg19&position=chr2:219761182-223193679&hgsid=443358811_uawFxZ8D0XFx7YCAwxfiOv0gYN64
2	223150663	225645337	124	-0.0529	http://genome.ucsc.edu/cgi-bin/hgTracks?db=hg19&position=chr2:223100663-225695337&hgsid=443358811_uawFxZ8D0XFx7YCAwxfiOv0gYN64
2	225723094	228176097	59	-0.1468	http://genome.ucsc.edu/cgi-bin/hgTracks?db=hg19&position=chr2:225673094-228226097&hgsid=443358811_uawFxZ8D0XFx7YCAwxfiOv0gYN64
2	228227854	228789240	50	0.0017	http://genome.ucsc.edu/cgi-bin/hgTracks?db=hg19&position=chr2:228177854-228839240&hgsid=443358811_uawFxZ8D0XFx7YCAwxfiOv0gYN64
2	228862718	230509051	26	-0.2064	http://genome.ucsc.edu/cgi-bin/hgTracks?db=hg19&position=chr2:228812718-230559051&hgsid=443358811_uawFxZ8D0XFx7YCAwxfiOv0gYN64
2	230562624	243016749	698	-0.0411	http://genome.ucsc.edu/cgi-bin/hgTracks?db=hg19&position=chr2:230512624-243066749&hgsid=443358811_uawFxZ8D0XFx7YCAwxfiOv0gYN64
3	129284	4653282	115	-0.1629	http://genome.ucsc.edu/cgi-bin/hgTracks?db=hg19&position=chr3:79284-4703282&hgsid=443358811_uawFxZ8D0XFx7YCAwxfiOv0gYN64
3	4664102	20363285	632	-0.0494	http://genome.ucsc.edu/cgi-bin/hgTracks?db=hg19&position=chr3:4614102-20413285&hgsid=443358811_uawFxZ8D0XFx7YCAwxfiOv0gYN64
3	20577752	30103373	269	-0.1224	http://genome.ucsc.edu/cgi-bin/hgTracks?db=hg19&position=chr3:20527752-30153373&hgsid=443358811_uawFxZ8D0XFx7YCAwxfiOv0gYN64
3	30121979	50399681	1063	-0.0346	http://genome.ucsc.edu/cgi-bin/hgTracks?db=hg19&position=chr3:30071979-50449681&hgsid=443358811_uawFxZ8D0XFx7YCAwxfiOv0gYN64
3	50466902	51217360	20	-0.2113	http://genome.ucsc.edu/cgi-bin/hgTracks?db=hg19&position=chr3:50416902-51267360&hgsid=443358811_uawFxZ8D0XFx7YCAwxfiOv0gYN64
3	51304805	53886162	178	-0.0151	http://genome.ucsc.edu/cgi-bin/hgTracks?db=hg19&position=chr3:51254805-53936162&hgsid=443358811_uawFxZ8D0XFx7YCAwxfiOv0gYN64
3	53900144	56569196	65	-0.145	http://genome.ucsc.edu/cgi-bin/hgTracks?db=hg19&position=chr3:53850144-56619196&hgsid=443358811_uawFxZ8D0XFx7YCAwxfiOv0gYN64
3	56569550	68341476	452	-0.0258	http://genome.ucsc.edu/cgi-bin/hgTracks?db=hg19&position=chr3:56519550-68391476&hgsid=443358811_uawFxZ8D0XFx7YCAwxfiOv0gYN64
3	68352591	69020594	14	-0.2548	http://genome.ucsc.edu/cgi-bin/hgTracks?db=hg19&position=chr3:68302591-69070594&hgsid=443358811_uawFxZ8D0XFx7YCAwxfiOv0gYN64
3	69022045	73356601	239	-0.0558	http://genome.ucsc.edu/cgi-bin/hgTracks?db=hg19&position=chr3:68972045-73406601&hgsid=443358811_uawFxZ8D0XFx7YCAwxfiOv0gYN64
3	73401415	90352947	387	-0.1427	http://genome.ucsc.edu/cgi-bin/hgTracks?db=hg19&position=chr3:73351415-90402947&hgsid=443358811_uawFxZ8D0XFx7YCAwxfiOv0gYN64
3	93529821	101982192	221	-0.0756	http://genome.ucsc.edu/cgi-bin/hgTracks?db=hg19&position=chr3:93479821-102032192&hgsid=443358811_uawFxZ8D0XFx7YCAwxfiOv0gYN64
3	101995951	104655787	53	-0.1874	http://genome.ucsc.edu/cgi-bin/hgTracks?db=hg19&position=chr3:101945951-104705787&hgsid=443358811_uawFxZ8D0XFx7YCAwxfiOv0gYN64
3	104661545	142795483	1248	-0.055	http://genome.ucsc.edu/cgi-bin/hgTracks?db=hg19&position=chr3:104611545-142845483&hgsid=443358811_uawFxZ8D0XFx7YCAwxfiOv0gYN64
3	142821468	148073906	99	-0.1682	http://genome.ucsc.edu/cgi-bin/hgTracks?db=hg19&position=chr3:142771468-148123906&hgsid=443358811_uawFxZ8D0XFx7YCAwxfiOv0gYN64
3	148140402	160841688	387	-0.0721	http://genome.ucsc.edu/cgi-bin/hgTracks?db=hg19&position=chr3:148090402-160891688&hgsid=443358811_uawFxZ8D0XFx7YCAwxfiOv0gYN64
3	160855926	167215684	120	-0.1699	http://genome.ucsc.edu/cgi-bin/hgTracks?db=hg19&position=chr3:160805926-167265684&hgsid=443358811_uawFxZ8D0XFx7YCAwxfiOv0gYN64
3	167310214	192018527	1017	-0.056	http://genome.ucsc.edu/cgi-bin/hgTracks?db=hg19&position=chr3:167260214-192068527&hgsid=443358811_uawFxZ8D0XFx7YCAwxfiOv0gYN64
3	192099784	192224146	6	-0.4467	http://genome.ucsc.edu/cgi-bin/hgTracks?db=hg19&position=chr3:192049784-192274146&hgsid=443358811_uawFxZ8D0XFx7YCAwxfiOv0gYN64
3	192239741	197839077	485	-0.0336	http://genome.ucsc.edu/cgi-bin/hgTracks?db=hg19&position=chr3:192189741-197889077&hgsid=443358811_uawFxZ8D0XFx7YCAwxfiOv0gYN64
4	35032	4879257	321	-0.0394	http://genome.ucsc.edu/cgi-bin/hgTracks?db=hg19&position=chr4:-14968-4929257&hgsid=443358811_uawFxZ8D0XFx7YCAwxfiOv0gYN64
4	5004534	6318564	36	-0.1809	http://genome.ucsc.edu/cgi-bin/hgTracks?db=hg19&position=chr4:4954534-6368564&hgsid=443358811_uawFxZ8D0XFx7YCAwxfiOv0gYN64
4	6544140	11781162	176	-0.0261	http://genome.ucsc.edu/cgi-bin/hgTracks?db=hg19&position=chr4:6494140-11831162&hgsid=443358811_uawFxZ8D0XFx7YCAwxfiOv0gYN64
4	11788387	15331279	66	-0.1679	http://genome.ucsc.edu/cgi-bin/hgTracks?db=hg19&position=chr4:11738387-15381279&hgsid=443358811_uawFxZ8D0XFx7YCAwxfiOv0gYN64
4	15442481	16797638	45	-0.0321	http://genome.ucsc.edu/cgi-bin/hgTracks?db=hg19&position=chr4:15392481-16847638&hgsid=443358811_uawFxZ8D0XFx7YCAwxfiOv0gYN64
4	16802288	17018054	10	-0.2717	http://genome.ucsc.edu/cgi-bin/hgTracks?db=hg19&position=chr4:16752288-17068054&hgsid=443358811_uawFxZ8D0XFx7YCAwxfiOv0gYN64
4	17294444	19240415	47	-0.0551	http://genome.ucsc.edu/cgi-bin/hgTracks?db=hg19&position=chr4:17244444-19290415&hgsid=443358811_uawFxZ8D0XFx7YCAwxfiOv0gYN64
4	19330063	20499518	24	-0.2344	http://genome.ucsc.edu/cgi-bin/hgTracks?db=hg19&position=chr4:19280063-20549518&hgsid=443358811_uawFxZ8D0XFx7YCAwxfiOv0gYN64
4	20528917	27053590	224	-0.09	http://genome.ucsc.edu/cgi-bin/hgTracks?db=hg19&position=chr4:20478917-27103590&hgsid=443358811_uawFxZ8D0XFx7YCAwxfiOv0gYN64
4	27343979	37315307	250	-0.1606	http://genome.ucsc.edu/cgi-bin/hgTracks?db=hg19&position=chr4:27293979-37365307&hgsid=443358811_uawFxZ8D0XFx7YCAwxfiOv0gYN64
4	37422026	38954597	64	-0.0042	http://genome.ucsc.edu/cgi-bin/hgTracks?db=hg19&position=chr4:37372026-39004597&hgsid=443358811_uawFxZ8D0XFx7YCAwxfiOv0gYN64
4	38996287	39153416	13	-0.1867	http://genome.ucsc.edu/cgi-bin/hgTracks?db=hg19&position=chr4:38946287-39203416&hgsid=443358811_uawFxZ8D0XFx7YCAwxfiOv0gYN64
4	39155996	41223090	248	-0.0228	http://genome.ucsc.edu/cgi-bin/hgTracks?db=hg19&position=chr4:39105996-41273090&hgsid=443358811_uawFxZ8D0XFx7YCAwxfiOv0gYN64
4	41264197	47519149	151	-0.13	http://genome.ucsc.edu/cgi-bin/hgTracks?db=hg19&position=chr4:41214197-47569149&hgsid=443358811_uawFxZ8D0XFx7YCAwxfiOv0gYN64
4	47567015	49160453	60	-0.0184	http://genome.ucsc.edu/cgi-bin/hgTracks?db=hg19&position=chr4:47517015-49210453&hgsid=443358811_uawFxZ8D0XFx7YCAwxfiOv0gYN64
4	52713789	53583443	15	-0.1442	http://genome.ucsc.edu/cgi-bin/hgTracks?db=hg19&position=chr4:52663789-53633443&hgsid=443358811_uawFxZ8D0XFx7YCAwxfiOv0gYN64
4	53615687	57384166	121	-0.0497	http://genome.ucsc.edu/cgi-bin/hgTracks?db=hg19&position=chr4:53565687-57434166&hgsid=443358811_uawFxZ8D0XFx7YCAwxfiOv0gYN64
4	57416989	57478508	3	-0.3522	http://genome.ucsc.edu/cgi-bin/hgTracks?db=hg19&position=chr4:57366989-57528508&hgsid=443358811_uawFxZ8D0XFx7YCAwxfiOv0gYN64
4	57486553	57930224	55	-0.0404	http://genome.ucsc.edu/cgi-bin/hgTracks?db=hg19&position=chr4:57436553-57980224&hgsid=443358811_uawFxZ8D0XFx7YCAwxfiOv0gYN64
4	58014728	71130963	260	-0.1397	http://genome.ucsc.edu/cgi-bin/hgTracks?db=hg19&position=chr4:57964728-71180963&hgsid=443358811_uawFxZ8D0XFx7YCAwxfiOv0gYN64
4	71175847	92273417	609	-0.0576	http://genome.ucsc.edu/cgi-bin/hgTracks?db=hg19&position=chr4:71125847-92323417&hgsid=443358811_uawFxZ8D0XFx7YCAwxfiOv0gYN64
4	92717812	99162222	122	-0.1499	http://genome.ucsc.edu/cgi-bin/hgTracks?db=hg19&position=chr4:92667812-99212222&hgsid=443358811_uawFxZ8D0XFx7YCAwxfiOv0gYN64
4	99199104	130603347	703	-0.0682	http://genome.ucsc.edu/cgi-bin/hgTracks?db=hg19&position=chr4:99149104-130653347&hgsid=443358811_uawFxZ8D0XFx7YCAwxfiOv0gYN64
4	130606924	139904658	190	-0.1473	http://genome.ucsc.edu/cgi-bin/hgTracks?db=hg19&position=chr4:130556924-139954658&hgsid=443358811_uawFxZ8D0XFx7YCAwxfiOv0gYN64
4	139907914	154520928	415	-0.0303	http://genome.ucsc.edu/cgi-bin/hgTracks?db=hg19&position=chr4:139857914-154570928&hgsid=443358811_uawFxZ8D0XFx7YCAwxfiOv0gYN64
4	154545259	169031080	353	-0.1185	http://genome.ucsc.edu/cgi-bin/hgTracks?db=hg19&position=chr4:154495259-169081080&hgsid=443358811_uawFxZ8D0XFx7YCAwxfiOv0gYN64
4	169042983	170666831	61	0.015	http://genome.ucsc.edu/cgi-bin/hgTracks?db=hg19&position=chr4:168992983-170716831&hgsid=443358811_uawFxZ8D0XFx7YCAwxfiOv0gYN64
4	170680208	183706579	337	-0.1479	http://genome.ucsc.edu/cgi-bin/hgTracks?db=hg19&position=chr4:170630208-183756579&hgsid=443358811_uawFxZ8D0XFx7YCAwxfiOv0gYN64
4	183719190	184649447	59	-0.0624	http://genome.ucsc.edu/cgi-bin/hgTracks?db=hg19&position=chr4:183669190-184699447&hgsid=443358811_uawFxZ8D0XFx7YCAwxfiOv0gYN64
4	184650598	184665321	3	-0.52	http://genome.ucsc.edu/cgi-bin/hgTracks?db=hg19&position=chr4:184600598-184715321&hgsid=443358811_uawFxZ8D0XFx7YCAwxfiOv0gYN64
4	184684756	185194585	18	-0.1091	http://genome.ucsc.edu/cgi-bin/hgTracks?db=hg19&position=chr4:184634756-185244585&hgsid=443358811_uawFxZ8D0XFx7YCAwxfiOv0gYN64
4	185273820	186355095	70	-0.008	http://genome.ucsc.edu/cgi-bin/hgTracks?db=hg19&position=chr4:185223820-186405095&hgsid=443358811_uawFxZ8D0XFx7YCAwxfiOv0gYN64
4	186370395	191033113	194	-0.0926	http://genome.ucsc.edu/cgi-bin/hgTracks?db=hg19&position=chr4:186320395-191083113&hgsid=443358811_uawFxZ8D0XFx7YCAwxfiOv0gYN64
5	13855	17266638	462	-0.0849	http://genome.ucsc.edu/cgi-bin/hgTracks?db=hg19&position=chr5:-36145-17316638&hgsid=443358811_uawFxZ8D0XFx7YCAwxfiOv0gYN64
5	17267618	32070821	425	-0.1451	http://genome.ucsc.edu/cgi-bin/hgTracks?db=hg19&position=chr5:17217618-32120821&hgsid=443358811_uawFxZ8D0XFx7YCAwxfiOv0gYN64
5	32072555	46104940	494	-0.0642	http://genome.ucsc.edu/cgi-bin/hgTracks?db=hg19&position=chr5:32022555-46154940&hgsid=443358811_uawFxZ8D0XFx7YCAwxfiOv0gYN64
5	49443126	50400795	16	-0.0625	http://genome.ucsc.edu/cgi-bin/hgTracks?db=hg19&position=chr5:49393126-50450795&hgsid=443358811_uawFxZ8D0XFx7YCAwxfiOv0gYN64
5	50519396	51278080	23	-0.2013	http://genome.ucsc.edu/cgi-bin/hgTracks?db=hg19&position=chr5:50469396-51328080&hgsid=443358811_uawFxZ8D0XFx7YCAwxfiOv0gYN64
5	51345459	62024473	322	-0.0449	http://genome.ucsc.edu/cgi-bin/hgTracks?db=hg19&position=chr5:51295459-62074473&hgsid=443358811_uawFxZ8D0XFx7YCAwxfiOv0gYN64
5	62107624	62361770	4	-0.4158	http://genome.ucsc.edu/cgi-bin/hgTracks?db=hg19&position=chr5:62057624-62411770&hgsid=443358811_uawFxZ8D0XFx7YCAwxfiOv0gYN64
5	62402066	127528540	1673	-0.0656	http://genome.ucsc.edu/cgi-bin/hgTracks?db=hg19&position=chr5:62352066-127578540&hgsid=443358811_uawFxZ8D0XFx7YCAwxfiOv0gYN64
5	127562412	127909218	12	-0.2808	http://genome.ucsc.edu/cgi-bin/hgTracks?db=hg19&position=chr5:127512412-127959218&hgsid=443358811_uawFxZ8D0XFx7YCAwxfiOv0gYN64
5	127933631	160345951	1308	-0.0457	http://genome.ucsc.edu/cgi-bin/hgTracks?db=hg19&position=chr5:127883631-160395951&hgsid=443358811_uawFxZ8D0XFx7YCAwxfiOv0gYN64
5	160408797	167684621	208	-0.1434	http://genome.ucsc.edu/cgi-bin/hgTracks?db=hg19&position=chr5:160358797-167734621&hgsid=443358811_uawFxZ8D0XFx7YCAwxfiOv0gYN64
5	167698418	180698548	805	-0.0598	http://genome.ucsc.edu/cgi-bin/hgTracks?db=hg19&position=chr5:167648418-180748548&hgsid=443358811_uawFxZ8D0XFx7YCAwxfiOv0gYN64
6	238812	7642665	322	-0.0377	http://genome.ucsc.edu/cgi-bin/hgTracks?db=hg19&position=chr6:188812-7692665&hgsid=443358811_uawFxZ8D0XFx7YCAwxfiOv0gYN64
6	7688891	10631272	97	-0.1516	http://genome.ucsc.edu/cgi-bin/hgTracks?db=hg19&position=chr6:7638891-10681272&hgsid=443358811_uawFxZ8D0XFx7YCAwxfiOv0gYN64
6	10638498	38646896	1958	-0.0474	http://genome.ucsc.edu/cgi-bin/hgTracks?db=hg19&position=chr6:10588498-38696896&hgsid=443358811_uawFxZ8D0XFx7YCAwxfiOv0gYN64
6	38669705	38908612	13	-0.2905	http://genome.ucsc.edu/cgi-bin/hgTracks?db=hg19&position=chr6:38619705-38958612&hgsid=443358811_uawFxZ8D0XFx7YCAwxfiOv0gYN64
6	38915524	39254594	6	0.0217	http://genome.ucsc.edu/cgi-bin/hgTracks?db=hg19&position=chr6:38865524-39304594&hgsid=443358811_uawFxZ8D0XFx7YCAwxfiOv0gYN64
6	39318994	40367163	14	-0.2269	http://genome.ucsc.edu/cgi-bin/hgTracks?db=hg19&position=chr6:39268994-40417163&hgsid=443358811_uawFxZ8D0XFx7YCAwxfiOv0gYN64
6	40483346	58706852	617	-0.0567	http://genome.ucsc.edu/cgi-bin/hgTracks?db=hg19&position=chr6:40433346-58756852&hgsid=443358811_uawFxZ8D0XFx7YCAwxfiOv0gYN64
6	61978733	74113845	313	-0.1412	http://genome.ucsc.edu/cgi-bin/hgTracks?db=hg19&position=chr6:61928733-74163845&hgsid=443358811_uawFxZ8D0XFx7YCAwxfiOv0gYN64
6	74119898	90596882	487	-0.0676	http://genome.ucsc.edu/cgi-bin/hgTracks?db=hg19&position=chr6:74069898-90646882&hgsid=443358811_uawFxZ8D0XFx7YCAwxfiOv0gYN64
6	90597957	99662813	172	-0.148	http://genome.ucsc.edu/cgi-bin/hgTracks?db=hg19&position=chr6:90547957-99712813&hgsid=443358811_uawFxZ8D0XFx7YCAwxfiOv0gYN64
6	99685626	100496906	39	-0.0126	http://genome.ucsc.edu/cgi-bin/hgTracks?db=hg19&position=chr6:99635626-100546906&hgsid=443358811_uawFxZ8D0XFx7YCAwxfiOv0gYN64
6	100592229	105635400	115	-0.1507	http://genome.ucsc.edu/cgi-bin/hgTracks?db=hg19&position=chr6:100542229-105685400&hgsid=443358811_uawFxZ8D0XFx7YCAwxfiOv0gYN64
6	105644306	114473088	441	-0.0437	http://genome.ucsc.edu/cgi-bin/hgTracks?db=hg19&position=chr6:105594306-114523088&hgsid=443358811_uawFxZ8D0XFx7YCAwxfiOv0gYN64
6	114494741	114765021	6	-0.1817	http://genome.ucsc.edu/cgi-bin/hgTracks?db=hg19&position=chr6:114444741-114815021&hgsid=443358811_uawFxZ8D0XFx7YCAwxfiOv0gYN64
6	114782986	115188514	6	-0.4317	http://genome.ucsc.edu/cgi-bin/hgTracks?db=hg19&position=chr6:114732986-115238514&hgsid=443358811_uawFxZ8D0XFx7YCAwxfiOv0gYN64
6	115193705	133213675	453	-0.0939	http://genome.ucsc.edu/cgi-bin/hgTracks?db=hg19&position=chr6:115143705-133263675&hgsid=443358811_uawFxZ8D0XFx7YCAwxfiOv0gYN64
6	133219087	133648267	10	-0.3293	http://genome.ucsc.edu/cgi-bin/hgTracks?db=hg19&position=chr6:133169087-133698267&hgsid=443358811_uawFxZ8D0XFx7YCAwxfiOv0gYN64
6	133684617	135252394	87	-0.1126	http://genome.ucsc.edu/cgi-bin/hgTracks?db=hg19&position=chr6:133634617-135302394&hgsid=443358811_uawFxZ8D0XFx7YCAwxfiOv0gYN64
6	135263076	152097691	728	-0.0578	http://genome.ucsc.edu/cgi-bin/hgTracks?db=hg19&position=chr6:135213076-152147691&hgsid=443358811_uawFxZ8D0XFx7YCAwxfiOv0gYN64
6	152117003	154375225	58	-0.189	http://genome.ucsc.edu/cgi-bin/hgTracks?db=hg19&position=chr6:152067003-154425225&hgsid=443358811_uawFxZ8D0XFx7YCAwxfiOv0gYN64
6	154390382	160944007	346	-0.0494	http://genome.ucsc.edu/cgi-bin/hgTracks?db=hg19&position=chr6:154340382-160994007&hgsid=443358811_uawFxZ8D0XFx7YCAwxfiOv0gYN64
6	161112205	165800211	145	-0.1483	http://genome.ucsc.edu/cgi-bin/hgTracks?db=hg19&position=chr6:161062205-165850211&hgsid=443358811_uawFxZ8D0XFx7YCAwxfiOv0gYN64
6	165822754	170906804	138	-0.0612	http://genome.ucsc.edu/cgi-bin/hgTracks?db=hg19&position=chr6:165772754-170956804&hgsid=443358811_uawFxZ8D0XFx7YCAwxfiOv0gYN64
7	151335	1214224	129	-0.0298	http://genome.ucsc.edu/cgi-bin/hgTracks?db=hg19&position=chr7:101335-1264224&hgsid=443358811_uawFxZ8D0XFx7YCAwxfiOv0gYN64
7	1221685	1470507	37	-0.1873	http://genome.ucsc.edu/cgi-bin/hgTracks?db=hg19&position=chr7:1171685-1520507&hgsid=443358811_uawFxZ8D0XFx7YCAwxfiOv0gYN64
7	1495936	1616210	20	-0.018	http://genome.ucsc.edu/cgi-bin/hgTracks?db=hg19&position=chr7:1445936-1666210&hgsid=443358811_uawFxZ8D0XFx7YCAwxfiOv0gYN64
7	1652392	1809725	18	-0.2037	http://genome.ucsc.edu/cgi-bin/hgTracks?db=hg19&position=chr7:1602392-1859725&hgsid=443358811_uawFxZ8D0XFx7YCAwxfiOv0gYN64
7	1810625	2927135	159	-0.0343	http://genome.ucsc.edu/cgi-bin/hgTracks?db=hg19&position=chr7:1760625-2977135&hgsid=443358811_uawFxZ8D0XFx7YCAwxfiOv0gYN64
7	2935304	4607190	103	-0.2028	http://genome.ucsc.edu/cgi-bin/hgTracks?db=hg19&position=chr7:2885304-4657190&hgsid=443358811_uawFxZ8D0XFx7YCAwxfiOv0gYN64
7	4612131	8307299	440	-0.0657	http://genome.ucsc.edu/cgi-bin/hgTracks?db=hg19&position=chr7:4562131-8357299&hgsid=443358811_uawFxZ8D0XFx7YCAwxfiOv0gYN64
7	8316478	10479802	47	-0.2223	http://genome.ucsc.edu/cgi-bin/hgTracks?db=hg19&position=chr7:8266478-10529802&hgsid=443358811_uawFxZ8D0XFx7YCAwxfiOv0gYN64
7	10607859	57857193	1633	-0.0857	http://genome.ucsc.edu/cgi-bin/hgTracks?db=hg19&position=chr7:10557859-57907193&hgsid=443358811_uawFxZ8D0XFx7YCAwxfiOv0gYN64
7	62191440	66813540	306	-0.054	http://genome.ucsc.edu/cgi-bin/hgTracks?db=hg19&position=chr7:62141440-66863540&hgsid=443358811_uawFxZ8D0XFx7YCAwxfiOv0gYN64
7	66815192	69582736	208	-0.1771	http://genome.ucsc.edu/cgi-bin/hgTracks?db=hg19&position=chr7:66765192-69632736&hgsid=443358811_uawFxZ8D0XFx7YCAwxfiOv0gYN64
7	69591817	70189430	37	-0.0032	http://genome.ucsc.edu/cgi-bin/hgTracks?db=hg19&position=chr7:69541817-70239430&hgsid=443358811_uawFxZ8D0XFx7YCAwxfiOv0gYN64
7	70194887	72002699	162	-0.1601	http://genome.ucsc.edu/cgi-bin/hgTracks?db=hg19&position=chr7:70144887-72052699&hgsid=443358811_uawFxZ8D0XFx7YCAwxfiOv0gYN64
7	72004478	77674204	536	-0.0334	http://genome.ucsc.edu/cgi-bin/hgTracks?db=hg19&position=chr7:71954478-77724204&hgsid=443358811_uawFxZ8D0XFx7YCAwxfiOv0gYN64
7	77715959	89267603	316	-0.1339	http://genome.ucsc.edu/cgi-bin/hgTracks?db=hg19&position=chr7:77665959-89317603&hgsid=443358811_uawFxZ8D0XFx7YCAwxfiOv0gYN64
7	89374564	108208653	1138	-0.0525	http://genome.ucsc.edu/cgi-bin/hgTracks?db=hg19&position=chr7:89324564-108258653&hgsid=443358811_uawFxZ8D0XFx7YCAwxfiOv0gYN64
7	108325382	126034738	432	-0.1311	http://genome.ucsc.edu/cgi-bin/hgTracks?db=hg19&position=chr7:108275382-126084738&hgsid=443358811_uawFxZ8D0XFx7YCAwxfiOv0gYN64
7	126163553	144893445	894	-0.0628	http://genome.ucsc.edu/cgi-bin/hgTracks?db=hg19&position=chr7:126113553-144943445&hgsid=443358811_uawFxZ8D0XFx7YCAwxfiOv0gYN64
7	144898249	147911653	83	-0.1569	http://genome.ucsc.edu/cgi-bin/hgTracks?db=hg19&position=chr7:144848249-147961653&hgsid=443358811_uawFxZ8D0XFx7YCAwxfiOv0gYN64
7	147925634	152183356	312	-0.0413	http://genome.ucsc.edu/cgi-bin/hgTracks?db=hg19&position=chr7:147875634-152233356&hgsid=443358811_uawFxZ8D0XFx7YCAwxfiOv0gYN64
7	152197722	155349120	127	-0.122	http://genome.ucsc.edu/cgi-bin/hgTracks?db=hg19&position=chr7:152147722-155399120&hgsid=443358811_uawFxZ8D0XFx7YCAwxfiOv0gYN64
7	155416514	156793706	37	-0.0445	http://genome.ucsc.edu/cgi-bin/hgTracks?db=hg19&position=chr7:155366514-156843706&hgsid=443358811_uawFxZ8D0XFx7YCAwxfiOv0gYN64
7	156794185	156805345	3	0.35	http://genome.ucsc.edu/cgi-bin/hgTracks?db=hg19&position=chr7:156744185-156855345&hgsid=443358811_uawFxZ8D0XFx7YCAwxfiOv0gYN64
7	156819959	159049287	163	-0.0372	http://genome.ucsc.edu/cgi-bin/hgTracks?db=hg19&position=chr7:156769959-159099287&hgsid=443358811_uawFxZ8D0XFx7YCAwxfiOv0gYN64
8	171734	6202386	240	-0.137	http://genome.ucsc.edu/cgi-bin/hgTracks?db=hg19&position=chr8:121734-6252386&hgsid=443358811_uawFxZ8D0XFx7YCAwxfiOv0gYN64
8	6205134	8955748	118	-0.0197	http://genome.ucsc.edu/cgi-bin/hgTracks?db=hg19&position=chr8:6155134-9005748&hgsid=443358811_uawFxZ8D0XFx7YCAwxfiOv0gYN64
8	8985722	12900251	173	-0.1008	http://genome.ucsc.edu/cgi-bin/hgTracks?db=hg19&position=chr8:8935722-12950251&hgsid=443358811_uawFxZ8D0XFx7YCAwxfiOv0gYN64
8	12902115	16345770	135	-0.1915	http://genome.ucsc.edu/cgi-bin/hgTracks?db=hg19&position=chr8:12852115-16395770&hgsid=443358811_uawFxZ8D0XFx7YCAwxfiOv0gYN64
8	16355385	19729121	169	-0.0674	http://genome.ucsc.edu/cgi-bin/hgTracks?db=hg19&position=chr8:16305385-19779121&hgsid=443358811_uawFxZ8D0XFx7YCAwxfiOv0gYN64
8	19780303	21585778	57	-0.1743	http://genome.ucsc.edu/cgi-bin/hgTracks?db=hg19&position=chr8:19730303-21635778&hgsid=443358811_uawFxZ8D0XFx7YCAwxfiOv0gYN64
8	21587635	23037603	114	-0.0136	http://genome.ucsc.edu/cgi-bin/hgTracks?db=hg19&position=chr8:21537635-23087603&hgsid=443358811_uawFxZ8D0XFx7YCAwxfiOv0gYN64
8	23072748	25078125	77	-0.1305	http://genome.ucsc.edu/cgi-bin/hgTracks?db=hg19&position=chr8:23022748-25128125&hgsid=443358811_uawFxZ8D0XFx7YCAwxfiOv0gYN64
8	25081624	25508901	25	0.022	http://genome.ucsc.edu/cgi-bin/hgTracks?db=hg19&position=chr8:25031624-25558901&hgsid=443358811_uawFxZ8D0XFx7YCAwxfiOv0gYN64
8	25672962	25930872	6	-0.2261	http://genome.ucsc.edu/cgi-bin/hgTracks?db=hg19&position=chr8:25622962-25980872&hgsid=443358811_uawFxZ8D0XFx7YCAwxfiOv0gYN64
8	25971305	26274966	22	-0.0103	http://genome.ucsc.edu/cgi-bin/hgTracks?db=hg19&position=chr8:25921305-26324966&hgsid=443358811_uawFxZ8D0XFx7YCAwxfiOv0gYN64
8	26283938	27057085	28	-0.1962	http://genome.ucsc.edu/cgi-bin/hgTracks?db=hg19&position=chr8:26233938-27107085&hgsid=443358811_uawFxZ8D0XFx7YCAwxfiOv0gYN64
8	27171953	31063360	267	-0.0348	http://genome.ucsc.edu/cgi-bin/hgTracks?db=hg19&position=chr8:27121953-31113360&hgsid=443358811_uawFxZ8D0XFx7YCAwxfiOv0gYN64
8	31066054	32864197	41	-0.2006	http://genome.ucsc.edu/cgi-bin/hgTracks?db=hg19&position=chr8:31016054-32914197&hgsid=443358811_uawFxZ8D0XFx7YCAwxfiOv0gYN64
8	32975766	33369124	21	-0.0283	http://genome.ucsc.edu/cgi-bin/hgTracks?db=hg19&position=chr8:32925766-33419124&hgsid=443358811_uawFxZ8D0XFx7YCAwxfiOv0gYN64
8	33371259	36963216	91	-0.1837	http://genome.ucsc.edu/cgi-bin/hgTracks?db=hg19&position=chr8:33321259-37013216&hgsid=443358811_uawFxZ8D0XFx7YCAwxfiOv0gYN64
8	36979321	43546429	357	-0.0645	http://genome.ucsc.edu/cgi-bin/hgTracks?db=hg19&position=chr8:36929321-43596429&hgsid=443358811_uawFxZ8D0XFx7YCAwxfiOv0gYN64
8	46941942	48158808	23	-0.1841	http://genome.ucsc.edu/cgi-bin/hgTracks?db=hg19&position=chr8:46891942-48208808&hgsid=443358811_uawFxZ8D0XFx7YCAwxfiOv0gYN64
8	48175985	104431100	1871	-0.0807	http://genome.ucsc.edu/cgi-bin/hgTracks?db=hg19&position=chr8:48125985-104481100&hgsid=443358811_uawFxZ8D0XFx7YCAwxfiOv0gYN64
8	104488311	116832129	280	-0.1667	http://genome.ucsc.edu/cgi-bin/hgTracks?db=hg19&position=chr8:104438311-116882129&hgsid=443358811_uawFxZ8D0XFx7YCAwxfiOv0gYN64
8	116926394	134531907	581	-0.065	http://genome.ucsc.edu/cgi-bin/hgTracks?db=hg19&position=chr8:116876394-134581907&hgsid=443358811_uawFxZ8D0XFx7YCAwxfiOv0gYN64
8	134547761	140683742	116	-0.1536	http://genome.ucsc.edu/cgi-bin/hgTracks?db=hg19&position=chr8:134497761-140733742&hgsid=443358811_uawFxZ8D0XFx7YCAwxfiOv0gYN64
8	140827637	146276311	353	-0.0409	http://genome.ucsc.edu/cgi-bin/hgTracks?db=hg19&position=chr8:140777637-146326311&hgsid=443358811_uawFxZ8D0XFx7YCAwxfiOv0gYN64
9	213732	9134056	374	-0.0378	http://genome.ucsc.edu/cgi-bin/hgTracks?db=hg19&position=chr9:163732-9184056&hgsid=443358811_uawFxZ8D0XFx7YCAwxfiOv0gYN64
9	9150502	10619151	30	-0.2062	http://genome.ucsc.edu/cgi-bin/hgTracks?db=hg19&position=chr9:9100502-10669151&hgsid=443358811_uawFxZ8D0XFx7YCAwxfiOv0gYN64
9	10659668	27631945	503	-0.0844	http://genome.ucsc.edu/cgi-bin/hgTracks?db=hg19&position=chr9:10609668-27681945&hgsid=443358811_uawFxZ8D0XFx7YCAwxfiOv0gYN64
9	27681586	32377551	68	-0.1698	http://genome.ucsc.edu/cgi-bin/hgTracks?db=hg19&position=chr9:27631586-32427551&hgsid=443358811_uawFxZ8D0XFx7YCAwxfiOv0gYN64
9	32406338	44898559	466	-0.038	http://genome.ucsc.edu/cgi-bin/hgTracks?db=hg19&position=chr9:32356338-44948559&hgsid=443358811_uawFxZ8D0XFx7YCAwxfiOv0gYN64
9	65604940	100992933	1174	-0.0534	http://genome.ucsc.edu/cgi-bin/hgTracks?db=hg19&position=chr9:65554940-101042933&hgsid=443358811_uawFxZ8D0XFx7YCAwxfiOv0gYN64
9	101018627	107425684	162	-0.1189	http://genome.ucsc.edu/cgi-bin/hgTracks?db=hg19&position=chr9:100968627-107475684&hgsid=443358811_uawFxZ8D0XFx7YCAwxfiOv0gYN64
9	107504171	113437843	245	-0.0307	http://genome.ucsc.edu/cgi-bin/hgTracks?db=hg19&position=chr9:107454171-113487843&hgsid=443358811_uawFxZ8D0XFx7YCAwxfiOv0gYN64
9	113466986	114109441	28	-0.1925	http://genome.ucsc.edu/cgi-bin/hgTracks?db=hg19&position=chr9:113416986-114159441&hgsid=443358811_uawFxZ8D0XFx7YCAwxfiOv0gYN64
9	114145919	117240421	184	-0.0459	http://genome.ucsc.edu/cgi-bin/hgTracks?db=hg19&position=chr9:114095919-117290421&hgsid=443358811_uawFxZ8D0XFx7YCAwxfiOv0gYN64
9	117248005	119472727	54	-0.1081	http://genome.ucsc.edu/cgi-bin/hgTracks?db=hg19&position=chr9:117198005-119522727&hgsid=443358811_uawFxZ8D0XFx7YCAwxfiOv0gYN64
9	119502785	121422518	30	-0.252	http://genome.ucsc.edu/cgi-bin/hgTracks?db=hg19&position=chr9:119452785-121472518&hgsid=443358811_uawFxZ8D0XFx7YCAwxfiOv0gYN64
9	121445715	141004890	1402	-0.048	http://genome.ucsc.edu/cgi-bin/hgTracks?db=hg19&position=chr9:121395715-141054890&hgsid=443358811_uawFxZ8D0XFx7YCAwxfiOv0gYN64
10	146905	1556137	78	-0.0185	http://genome.ucsc.edu/cgi-bin/hgTracks?db=hg19&position=chr10:96905-1606137&hgsid=443358811_uawFxZ8D0XFx7YCAwxfiOv0gYN64
10	1642574	3359601	58	-0.1385	http://genome.ucsc.edu/cgi-bin/hgTracks?db=hg19&position=chr10:1592574-3409601&hgsid=443358811_uawFxZ8D0XFx7YCAwxfiOv0gYN64
10	3440809	6043811	110	-0.0297	http://genome.ucsc.edu/cgi-bin/hgTracks?db=hg19&position=chr10:3390809-6093811&hgsid=443358811_uawFxZ8D0XFx7YCAwxfiOv0gYN64
10	6055796	6109063	4	-0.3117	http://genome.ucsc.edu/cgi-bin/hgTracks?db=hg19&position=chr10:6005796-6159063&hgsid=443358811_uawFxZ8D0XFx7YCAwxfiOv0gYN64
10	6110128	6647619	42	-0.0306	http://genome.ucsc.edu/cgi-bin/hgTracks?db=hg19&position=chr10:6060128-6697619&hgsid=443358811_uawFxZ8D0XFx7YCAwxfiOv0gYN64
10	6683085	10009401	115	-0.152	http://genome.ucsc.edu/cgi-bin/hgTracks?db=hg19&position=chr10:6633085-10059401&hgsid=443358811_uawFxZ8D0XFx7YCAwxfiOv0gYN64
10	10037315	23740255	846	-0.0616	http://genome.ucsc.edu/cgi-bin/hgTracks?db=hg19&position=chr10:9987315-23790255&hgsid=443358811_uawFxZ8D0XFx7YCAwxfiOv0gYN64
10	23767618	24435417	20	-0.254	http://genome.ucsc.edu/cgi-bin/hgTracks?db=hg19&position=chr10:23717618-24485417&hgsid=443358811_uawFxZ8D0XFx7YCAwxfiOv0gYN64
10	24477753	25375376	72	-0.041	http://genome.ucsc.edu/cgi-bin/hgTracks?db=hg19&position=chr10:24427753-25425376&hgsid=443358811_uawFxZ8D0XFx7YCAwxfiOv0gYN64
10	25388817	26855703	65	-0.1481	http://genome.ucsc.edu/cgi-bin/hgTracks?db=hg19&position=chr10:25338817-26905703&hgsid=443358811_uawFxZ8D0XFx7YCAwxfiOv0gYN64
10	26885492	35830339	539	-0.0591	http://genome.ucsc.edu/cgi-bin/hgTracks?db=hg19&position=chr10:26835492-35880339&hgsid=443358811_uawFxZ8D0XFx7YCAwxfiOv0gYN64
10	35837240	37988031	97	-0.137	http://genome.ucsc.edu/cgi-bin/hgTracks?db=hg19&position=chr10:35787240-38038031&hgsid=443358811_uawFxZ8D0XFx7YCAwxfiOv0gYN64
10	38079971	38915103	25	-0.0476	http://genome.ucsc.edu/cgi-bin/hgTracks?db=hg19&position=chr10:38029971-38965103&hgsid=443358811_uawFxZ8D0XFx7YCAwxfiOv0gYN64
10	42866696	52640755	197	-0.0566	http://genome.ucsc.edu/cgi-bin/hgTracks?db=hg19&position=chr10:42816696-52690755&hgsid=443358811_uawFxZ8D0XFx7YCAwxfiOv0gYN64
10	52665485	61215475	201	-0.1398	http://genome.ucsc.edu/cgi-bin/hgTracks?db=hg19&position=chr10:52615485-61265475&hgsid=443358811_uawFxZ8D0XFx7YCAwxfiOv0gYN64
10	61307330	66004102	189	-0.0381	http://genome.ucsc.edu/cgi-bin/hgTracks?db=hg19&position=chr10:61257330-66054102&hgsid=443358811_uawFxZ8D0XFx7YCAwxfiOv0gYN64
10	66069479	68471298	58	-0.1663	http://genome.ucsc.edu/cgi-bin/hgTracks?db=hg19&position=chr10:66019479-68521298&hgsid=443358811_uawFxZ8D0XFx7YCAwxfiOv0gYN64
10	68488344	79800769	714	-0.041	http://genome.ucsc.edu/cgi-bin/hgTracks?db=hg19&position=chr10:68438344-79850769&hgsid=443358811_uawFxZ8D0XFx7YCAwxfiOv0gYN64
10	79804757	88203497	175	-0.1331	http://genome.ucsc.edu/cgi-bin/hgTracks?db=hg19&position=chr10:79754757-88253497&hgsid=443358811_uawFxZ8D0XFx7YCAwxfiOv0gYN64
10	88210006	100274465	560	-0.0421	http://genome.ucsc.edu/cgi-bin/hgTracks?db=hg19&position=chr10:88160006-100324465&hgsid=443358811_uawFxZ8D0XFx7YCAwxfiOv0gYN64
10	100318790	101140888	12	-0.295	http://genome.ucsc.edu/cgi-bin/hgTracks?db=hg19&position=chr10:100268790-101190888&hgsid=443358811_uawFxZ8D0XFx7YCAwxfiOv0gYN64
10	101152467	106103508	415	-0.0328	http://genome.ucsc.edu/cgi-bin/hgTracks?db=hg19&position=chr10:101102467-106153508&hgsid=443358811_uawFxZ8D0XFx7YCAwxfiOv0gYN64
10	106168575	111228654	114	-0.1637	http://genome.ucsc.edu/cgi-bin/hgTracks?db=hg19&position=chr10:106118575-111278654&hgsid=443358811_uawFxZ8D0XFx7YCAwxfiOv0gYN64
10	111250371	129251652	651	-0.0506	http://genome.ucsc.edu/cgi-bin/hgTracks?db=hg19&position=chr10:111200371-129301652&hgsid=443358811_uawFxZ8D0XFx7YCAwxfiOv0gYN64
10	129345469	134986216	132	-0.1112	http://genome.ucsc.edu/cgi-bin/hgTracks?db=hg19&position=chr10:129295469-135036216&hgsid=443358811_uawFxZ8D0XFx7YCAwxfiOv0gYN64
10	135029900	135274018	33	-0.0089	http://genome.ucsc.edu/cgi-bin/hgTracks?db=hg19&position=chr10:134979900-135324018&hgsid=443358811_uawFxZ8D0XFx7YCAwxfiOv0gYN64
11	201303	427450	22	-0.0108	http://genome.ucsc.edu/cgi-bin/hgTracks?db=hg19&position=chr11:151303-477450&hgsid=443358811_uawFxZ8D0XFx7YCAwxfiOv0gYN64
11	440693	440810	2	-0.6833	http://genome.ucsc.edu/cgi-bin/hgTracks?db=hg19&position=chr11:390693-490810&hgsid=443358811_uawFxZ8D0XFx7YCAwxfiOv0gYN64
11	447700	4714670	248	-0.0372	http://genome.ucsc.edu/cgi-bin/hgTracks?db=hg19&position=chr11:397700-4764670&hgsid=443358811_uawFxZ8D0XFx7YCAwxfiOv0gYN64
11	4747955	5613865	14	-0.2726	http://genome.ucsc.edu/cgi-bin/hgTracks?db=hg19&position=chr11:4697955-5663865&hgsid=443358811_uawFxZ8D0XFx7YCAwxfiOv0gYN64
11	5615533	20609721	518	-0.0405	http://genome.ucsc.edu/cgi-bin/hgTracks?db=hg19&position=chr11:5565533-20659721&hgsid=443358811_uawFxZ8D0XFx7YCAwxfiOv0gYN64
11	20667182	26665021	109	-0.1548	http://genome.ucsc.edu/cgi-bin/hgTracks?db=hg19&position=chr11:20617182-26715021&hgsid=443358811_uawFxZ8D0XFx7YCAwxfiOv0gYN64
11	26746280	36659436	305	-0.079	http://genome.ucsc.edu/cgi-bin/hgTracks?db=hg19&position=chr11:26696280-36709436&hgsid=443358811_uawFxZ8D0XFx7YCAwxfiOv0gYN64
11	36684292	43234619	136	-0.1554	http://genome.ucsc.edu/cgi-bin/hgTracks?db=hg19&position=chr11:36634292-43284619&hgsid=443358811_uawFxZ8D0XFx7YCAwxfiOv0gYN64
11	43252148	44312949	48	-0.0458	http://genome.ucsc.edu/cgi-bin/hgTracks?db=hg19&position=chr11:43202148-44362949&hgsid=443358811_uawFxZ8D0XFx7YCAwxfiOv0gYN64
11	44423935	45871545	47	-0.1649	http://genome.ucsc.edu/cgi-bin/hgTracks?db=hg19&position=chr11:44373935-45921545&hgsid=443358811_uawFxZ8D0XFx7YCAwxfiOv0gYN64
11	45945257	50276359	290	-0.0396	http://genome.ucsc.edu/cgi-bin/hgTracks?db=hg19&position=chr11:45895257-50326359&hgsid=443358811_uawFxZ8D0XFx7YCAwxfiOv0gYN64
11	55305519	56014463	19	-0.1511	http://genome.ucsc.edu/cgi-bin/hgTracks?db=hg19&position=chr11:55255519-56064463&hgsid=443358811_uawFxZ8D0XFx7YCAwxfiOv0gYN64
11	56040212	56145930	3	-0.5144	http://genome.ucsc.edu/cgi-bin/hgTracks?db=hg19&position=chr11:55990212-56195930&hgsid=443358811_uawFxZ8D0XFx7YCAwxfiOv0gYN64
11	56169961	98112780	1903	-0.0457	http://genome.ucsc.edu/cgi-bin/hgTracks?db=hg19&position=chr11:56119961-98162780&hgsid=443358811_uawFxZ8D0XFx7YCAwxfiOv0gYN64
11	98113773	100476519	70	-0.2053	http://genome.ucsc.edu/cgi-bin/hgTracks?db=hg19&position=chr11:98063773-100526519&hgsid=443358811_uawFxZ8D0XFx7YCAwxfiOv0gYN64
11	100540454	100927089	22	-0.003	http://genome.ucsc.edu/cgi-bin/hgTracks?db=hg19&position=chr11:100490454-100977089&hgsid=443358811_uawFxZ8D0XFx7YCAwxfiOv0gYN64
11	101018694	101376465	7	-0.2481	http://genome.ucsc.edu/cgi-bin/hgTracks?db=hg19&position=chr11:100968694-101426465&hgsid=443358811_uawFxZ8D0XFx7YCAwxfiOv0gYN64
11	101379855	102981551	57	-0.0297	http://genome.ucsc.edu/cgi-bin/hgTracks?db=hg19&position=chr11:101329855-103031551&hgsid=443358811_uawFxZ8D0XFx7YCAwxfiOv0gYN64
11	103013117	104702855	30	-0.2082	http://genome.ucsc.edu/cgi-bin/hgTracks?db=hg19&position=chr11:102963117-104752855&hgsid=443358811_uawFxZ8D0XFx7YCAwxfiOv0gYN64
11	104774921	114756746	354	-0.0738	http://genome.ucsc.edu/cgi-bin/hgTracks?db=hg19&position=chr11:104724921-114806746&hgsid=443358811_uawFxZ8D0XFx7YCAwxfiOv0gYN64
11	114880911	115646202	17	-0.2653	http://genome.ucsc.edu/cgi-bin/hgTracks?db=hg19&position=chr11:114830911-115696202&hgsid=443358811_uawFxZ8D0XFx7YCAwxfiOv0gYN64
11	115950028	116761762	20	-0.1103	http://genome.ucsc.edu/cgi-bin/hgTracks?db=hg19&position=chr11:115900028-116811762&hgsid=443358811_uawFxZ8D0XFx7YCAwxfiOv0gYN64
11	116795727	130990089	639	-0.0698	http://genome.ucsc.edu/cgi-bin/hgTracks?db=hg19&position=chr11:116745727-131040089&hgsid=443358811_uawFxZ8D0XFx7YCAwxfiOv0gYN64
11	131025010	133486971	37	-0.2319	http://genome.ucsc.edu/cgi-bin/hgTracks?db=hg19&position=chr11:130975010-133536971&hgsid=443358811_uawFxZ8D0XFx7YCAwxfiOv0gYN64
11	133733623	134939058	36	-0.108	http://genome.ucsc.edu/cgi-bin/hgTracks?db=hg19&position=chr11:133683623-134989058&hgsid=443358811_uawFxZ8D0XFx7YCAwxfiOv0gYN64
12	200659	7866469	451	-0.0449	http://genome.ucsc.edu/cgi-bin/hgTracks?db=hg19&position=chr12:150659-7916469&hgsid=443358811_uawFxZ8D0XFx7YCAwxfiOv0gYN64
12	7868110	10364556	177	-0.1204	http://genome.ucsc.edu/cgi-bin/hgTracks?db=hg19&position=chr12:7818110-10414556&hgsid=443358811_uawFxZ8D0XFx7YCAwxfiOv0gYN64
12	10368689	16707672	282	-0.0235	http://genome.ucsc.edu/cgi-bin/hgTracks?db=hg19&position=chr12:10318689-16757672&hgsid=443358811_uawFxZ8D0XFx7YCAwxfiOv0gYN64
12	16767129	18378944	22	-0.1764	http://genome.ucsc.edu/cgi-bin/hgTracks?db=hg19&position=chr12:16717129-18428944&hgsid=443358811_uawFxZ8D0XFx7YCAwxfiOv0gYN64
12	18401225	19677102	77	-0.0181	http://genome.ucsc.edu/cgi-bin/hgTracks?db=hg19&position=chr12:18351225-19727102&hgsid=443358811_uawFxZ8D0XFx7YCAwxfiOv0gYN64
12	19678173	26968746	226	-0.1271	http://genome.ucsc.edu/cgi-bin/hgTracks?db=hg19&position=chr12:19628173-27018746&hgsid=443358811_uawFxZ8D0XFx7YCAwxfiOv0gYN64
12	26994873	29525588	88	-0.0176	http://genome.ucsc.edu/cgi-bin/hgTracks?db=hg19&position=chr12:26944873-29575588&hgsid=443358811_uawFxZ8D0XFx7YCAwxfiOv0gYN64
12	29557675	30865668	30	-0.1418	http://genome.ucsc.edu/cgi-bin/hgTracks?db=hg19&position=chr12:29507675-30915668&hgsid=443358811_uawFxZ8D0XFx7YCAwxfiOv0gYN64
12	30875553	33368657	171	-0.0134	http://genome.ucsc.edu/cgi-bin/hgTracks?db=hg19&position=chr12:30825553-33418657&hgsid=443358811_uawFxZ8D0XFx7YCAwxfiOv0gYN64
12	33471607	34415851	33	-0.1371	http://genome.ucsc.edu/cgi-bin/hgTracks?db=hg19&position=chr12:33421607-34465851&hgsid=443358811_uawFxZ8D0XFx7YCAwxfiOv0gYN64
12	37949574	83609604	1795	-0.0573	http://genome.ucsc.edu/cgi-bin/hgTracks?db=hg19&position=chr12:37899574-83659604&hgsid=443358811_uawFxZ8D0XFx7YCAwxfiOv0gYN64
12	83635536	87662691	78	-0.1669	http://genome.ucsc.edu/cgi-bin/hgTracks?db=hg19&position=chr12:83585536-87712691&hgsid=443358811_uawFxZ8D0XFx7YCAwxfiOv0gYN64
12	87720375	111255239	980	-0.0612	http://genome.ucsc.edu/cgi-bin/hgTracks?db=hg19&position=chr12:87670375-111305239&hgsid=443358811_uawFxZ8D0XFx7YCAwxfiOv0gYN64
12	111268025	111828361	33	-0.2014	http://genome.ucsc.edu/cgi-bin/hgTracks?db=hg19&position=chr12:111218025-111878361&hgsid=443358811_uawFxZ8D0XFx7YCAwxfiOv0gYN64
12	111828960	126038688	1314	-0.0412	http://genome.ucsc.edu/cgi-bin/hgTracks?db=hg19&position=chr12:111778960-126088688&hgsid=443358811_uawFxZ8D0XFx7YCAwxfiOv0gYN64
12	126148380	132180738	212	-0.1241	http://genome.ucsc.edu/cgi-bin/hgTracks?db=hg19&position=chr12:126098380-132230738&hgsid=443358811_uawFxZ8D0XFx7YCAwxfiOv0gYN64
12	132210748	133813300	148	-0.0089	http://genome.ucsc.edu/cgi-bin/hgTracks?db=hg19&position=chr12:132160748-133863300&hgsid=443358811_uawFxZ8D0XFx7YCAwxfiOv0gYN64
13	19402378	22151968	248	-0.0537	http://genome.ucsc.edu/cgi-bin/hgTracks?db=hg19&position=chr13:19352378-22201968&hgsid=443358811_uawFxZ8D0XFx7YCAwxfiOv0gYN64
13	22160546	23974548	83	-0.1477	http://genome.ucsc.edu/cgi-bin/hgTracks?db=hg19&position=chr13:22110546-24024548&hgsid=443358811_uawFxZ8D0XFx7YCAwxfiOv0gYN64
13	23986117	25618666	85	-0.0425	http://genome.ucsc.edu/cgi-bin/hgTracks?db=hg19&position=chr13:23936117-25668666&hgsid=443358811_uawFxZ8D0XFx7YCAwxfiOv0gYN64
13	25668705	26742867	53	-0.1809	http://genome.ucsc.edu/cgi-bin/hgTracks?db=hg19&position=chr13:25618705-26792867&hgsid=443358811_uawFxZ8D0XFx7YCAwxfiOv0gYN64
13	26746684	33421292	332	-0.0636	http://genome.ucsc.edu/cgi-bin/hgTracks?db=hg19&position=chr13:26696684-33471292&hgsid=443358811_uawFxZ8D0XFx7YCAwxfiOv0gYN64
13	33427818	40865792	200	-0.1568	http://genome.ucsc.edu/cgi-bin/hgTracks?db=hg19&position=chr13:33377818-40915792&hgsid=443358811_uawFxZ8D0XFx7YCAwxfiOv0gYN64
13	40906626	53481186	604	-0.0457	http://genome.ucsc.edu/cgi-bin/hgTracks?db=hg19&position=chr13:40856626-53531186&hgsid=443358811_uawFxZ8D0XFx7YCAwxfiOv0gYN64
13	53494958	71317017	474	-0.1863	http://genome.ucsc.edu/cgi-bin/hgTracks?db=hg19&position=chr13:53444958-71367017&hgsid=443358811_uawFxZ8D0XFx7YCAwxfiOv0gYN64
13	71335956	72566429	51	-0.0365	http://genome.ucsc.edu/cgi-bin/hgTracks?db=hg19&position=chr13:71285956-72616429&hgsid=443358811_uawFxZ8D0XFx7YCAwxfiOv0gYN64
13	72574428	73220298	8	-0.3304	http://genome.ucsc.edu/cgi-bin/hgTracks?db=hg19&position=chr13:72524428-73270298&hgsid=443358811_uawFxZ8D0XFx7YCAwxfiOv0gYN64
13	73245905	74354609	74	0.0041	http://genome.ucsc.edu/cgi-bin/hgTracks?db=hg19&position=chr13:73195905-74404609&hgsid=443358811_uawFxZ8D0XFx7YCAwxfiOv0gYN64
13	74360738	75773581	37	-0.1849	http://genome.ucsc.edu/cgi-bin/hgTracks?db=hg19&position=chr13:74310738-75823581&hgsid=443358811_uawFxZ8D0XFx7YCAwxfiOv0gYN64
13	75808386	76204528	28	-0.049	http://genome.ucsc.edu/cgi-bin/hgTracks?db=hg19&position=chr13:75758386-76254528&hgsid=443358811_uawFxZ8D0XFx7YCAwxfiOv0gYN64
13	76206999	77553710	31	-0.2249	http://genome.ucsc.edu/cgi-bin/hgTracks?db=hg19&position=chr13:76156999-77603710&hgsid=443358811_uawFxZ8D0XFx7YCAwxfiOv0gYN64
13	77577160	78387245	34	-0.0068	http://genome.ucsc.edu/cgi-bin/hgTracks?db=hg19&position=chr13:77527160-78437245&hgsid=443358811_uawFxZ8D0XFx7YCAwxfiOv0gYN64
13	78400938	79778730	33	-0.2338	http://genome.ucsc.edu/cgi-bin/hgTracks?db=hg19&position=chr13:78350938-79828730&hgsid=443358811_uawFxZ8D0XFx7YCAwxfiOv0gYN64
13	79858840	81131829	47	-0.0136	http://genome.ucsc.edu/cgi-bin/hgTracks?db=hg19&position=chr13:79808840-81181829&hgsid=443358811_uawFxZ8D0XFx7YCAwxfiOv0gYN64
13	81160133	81669857	15	-0.2067	http://genome.ucsc.edu/cgi-bin/hgTracks?db=hg19&position=chr13:81110133-81719857&hgsid=443358811_uawFxZ8D0XFx7YCAwxfiOv0gYN64
13	81670371	82065422	16	-0.0483	http://genome.ucsc.edu/cgi-bin/hgTracks?db=hg19&position=chr13:81620371-82115422&hgsid=443358811_uawFxZ8D0XFx7YCAwxfiOv0gYN64
13	82132563	83984235	37	-0.2408	http://genome.ucsc.edu/cgi-bin/hgTracks?db=hg19&position=chr13:82082563-84034235&hgsid=443358811_uawFxZ8D0XFx7YCAwxfiOv0gYN64
13	83990724	84247888	11	-0.423	http://genome.ucsc.edu/cgi-bin/hgTracks?db=hg19&position=chr13:83940724-84297888&hgsid=443358811_uawFxZ8D0XFx7YCAwxfiOv0gYN64
13	84275202	96307731	405	-0.1768	http://genome.ucsc.edu/cgi-bin/hgTracks?db=hg19&position=chr13:84225202-96357731&hgsid=443358811_uawFxZ8D0XFx7YCAwxfiOv0gYN64
13	96310253	96681117	16	0.0125	http://genome.ucsc.edu/cgi-bin/hgTracks?db=hg19&position=chr13:96260253-96731117&hgsid=443358811_uawFxZ8D0XFx7YCAwxfiOv0gYN64
13	96706895	98802301	78	-0.1202	http://genome.ucsc.edu/cgi-bin/hgTracks?db=hg19&position=chr13:96656895-98852301&hgsid=443358811_uawFxZ8D0XFx7YCAwxfiOv0gYN64
13	98818969	101322921	175	-0.0186	http://genome.ucsc.edu/cgi-bin/hgTracks?db=hg19&position=chr13:98768969-101372921&hgsid=443358811_uawFxZ8D0XFx7YCAwxfiOv0gYN64
13	101330535	103246635	42	-0.1928	http://genome.ucsc.edu/cgi-bin/hgTracks?db=hg19&position=chr13:101280535-103296635&hgsid=443358811_uawFxZ8D0XFx7YCAwxfiOv0gYN64
13	103263744	103637619	25	-0.0151	http://genome.ucsc.edu/cgi-bin/hgTracks?db=hg19&position=chr13:103213744-103687619&hgsid=443358811_uawFxZ8D0XFx7YCAwxfiOv0gYN64
13	103724225	106239614	77	-0.2045	http://genome.ucsc.edu/cgi-bin/hgTracks?db=hg19&position=chr13:103674225-106289614&hgsid=443358811_uawFxZ8D0XFx7YCAwxfiOv0gYN64
13	106248896	107474761	40	-0.0132	http://genome.ucsc.edu/cgi-bin/hgTracks?db=hg19&position=chr13:106198896-107524761&hgsid=443358811_uawFxZ8D0XFx7YCAwxfiOv0gYN64
13	107490357	111035954	91	-0.1427	http://genome.ucsc.edu/cgi-bin/hgTracks?db=hg19&position=chr13:107440357-111085954&hgsid=443358811_uawFxZ8D0XFx7YCAwxfiOv0gYN64
13	111104468	115093261	169	-0.0342	http://genome.ucsc.edu/cgi-bin/hgTracks?db=hg19&position=chr13:111054468-115143261&hgsid=443358811_uawFxZ8D0XFx7YCAwxfiOv0gYN64
14	19100807	25613831	284	-0.048	http://genome.ucsc.edu/cgi-bin/hgTracks?db=hg19&position=chr14:19050807-25663831&hgsid=443358811_uawFxZ8D0XFx7YCAwxfiOv0gYN64
14	25633452	30672131	99	-0.173	http://genome.ucsc.edu/cgi-bin/hgTracks?db=hg19&position=chr14:25583452-30722131&hgsid=443358811_uawFxZ8D0XFx7YCAwxfiOv0gYN64
14	30766691	36357152	326	-0.026	http://genome.ucsc.edu/cgi-bin/hgTracks?db=hg19&position=chr14:30716691-36407152&hgsid=443358811_uawFxZ8D0XFx7YCAwxfiOv0gYN64
14	36359211	37653967	32	-0.1847	http://genome.ucsc.edu/cgi-bin/hgTracks?db=hg19&position=chr14:36309211-37703967&hgsid=443358811_uawFxZ8D0XFx7YCAwxfiOv0gYN64
14	37665889	40976251	67	-0.0687	http://genome.ucsc.edu/cgi-bin/hgTracks?db=hg19&position=chr14:37615889-41026251&hgsid=443358811_uawFxZ8D0XFx7YCAwxfiOv0gYN64
14	41073113	44580401	61	-0.1881	http://genome.ucsc.edu/cgi-bin/hgTracks?db=hg19&position=chr14:41023113-44630401&hgsid=443358811_uawFxZ8D0XFx7YCAwxfiOv0gYN64
14	44625462	45723004	38	-0.0095	http://genome.ucsc.edu/cgi-bin/hgTracks?db=hg19&position=chr14:44575462-45773004&hgsid=443358811_uawFxZ8D0XFx7YCAwxfiOv0gYN64
14	45829865	50063932	77	-0.1563	http://genome.ucsc.edu/cgi-bin/hgTracks?db=hg19&position=chr14:45779865-50113932&hgsid=443358811_uawFxZ8D0XFx7YCAwxfiOv0gYN64
14	50064374	81958373	1365	-0.0451	http://genome.ucsc.edu/cgi-bin/hgTracks?db=hg19&position=chr14:50014374-82008373&hgsid=443358811_uawFxZ8D0XFx7YCAwxfiOv0gYN64
14	82038605	88735776	126	-0.163	http://genome.ucsc.edu/cgi-bin/hgTracks?db=hg19&position=chr14:81988605-88785776&hgsid=443358811_uawFxZ8D0XFx7YCAwxfiOv0gYN64
14	88758974	107268113	929	-0.0468	http://genome.ucsc.edu/cgi-bin/hgTracks?db=hg19&position=chr14:88708974-107318113&hgsid=443358811_uawFxZ8D0XFx7YCAwxfiOv0gYN64
15	20065002	29985347	307	-0.1176	http://genome.ucsc.edu/cgi-bin/hgTracks?db=hg19&position=chr15:20015002-30035347&hgsid=443358811_uawFxZ8D0XFx7YCAwxfiOv0gYN64
15	29995373	53040590	1049	-0.0391	http://genome.ucsc.edu/cgi-bin/hgTracks?db=hg19&position=chr15:29945373-53090590&hgsid=443358811_uawFxZ8D0XFx7YCAwxfiOv0gYN64
15	53051808	55460900	27	-0.2152	http://genome.ucsc.edu/cgi-bin/hgTracks?db=hg19&position=chr15:53001808-55510900&hgsid=443358811_uawFxZ8D0XFx7YCAwxfiOv0gYN64
15	55466179	61041945	353	-0.0316	http://genome.ucsc.edu/cgi-bin/hgTracks?db=hg19&position=chr15:55416179-61091945&hgsid=443358811_uawFxZ8D0XFx7YCAwxfiOv0gYN64
15	61074144	62133102	27	-0.2109	http://genome.ucsc.edu/cgi-bin/hgTracks?db=hg19&position=chr15:61024144-62183102&hgsid=443358811_uawFxZ8D0XFx7YCAwxfiOv0gYN64
15	62151289	74057777	646	-0.0304	http://genome.ucsc.edu/cgi-bin/hgTracks?db=hg19&position=chr15:62101289-74107777&hgsid=443358811_uawFxZ8D0XFx7YCAwxfiOv0gYN64
15	74061151	74253408	5	-0.4467	http://genome.ucsc.edu/cgi-bin/hgTracks?db=hg19&position=chr15:74011151-74303408&hgsid=443358811_uawFxZ8D0XFx7YCAwxfiOv0gYN64
15	74264306	86398265	544	-0.0419	http://genome.ucsc.edu/cgi-bin/hgTracks?db=hg19&position=chr15:74214306-86448265&hgsid=443358811_uawFxZ8D0XFx7YCAwxfiOv0gYN64
15	86442356	89163630	49	-0.1704	http://genome.ucsc.edu/cgi-bin/hgTracks?db=hg19&position=chr15:86392356-89213630&hgsid=443358811_uawFxZ8D0XFx7YCAwxfiOv0gYN64
15	89179786	93604390	285	-0.0347	http://genome.ucsc.edu/cgi-bin/hgTracks?db=hg19&position=chr15:89129786-93654390&hgsid=443358811_uawFxZ8D0XFx7YCAwxfiOv0gYN64
15	93620965	98578423	144	-0.1351	http://genome.ucsc.edu/cgi-bin/hgTracks?db=hg19&position=chr15:93570965-98628423&hgsid=443358811_uawFxZ8D0XFx7YCAwxfiOv0gYN64
15	98629328	102359691	152	-0.0379	http://genome.ucsc.edu/cgi-bin/hgTracks?db=hg19&position=chr15:98579328-102409691&hgsid=443358811_uawFxZ8D0XFx7YCAwxfiOv0gYN64
16	89487	4992744	764	-0.041	http://genome.ucsc.edu/cgi-bin/hgTracks?db=hg19&position=chr16:39487-5042744&hgsid=443358811_uawFxZ8D0XFx7YCAwxfiOv0gYN64
16	4998543	8330941	210	-0.1487	http://genome.ucsc.edu/cgi-bin/hgTracks?db=hg19&position=chr16:4948543-8380941&hgsid=443358811_uawFxZ8D0XFx7YCAwxfiOv0gYN64
16	8371290	35081384	1943	-0.0605	http://genome.ucsc.edu/cgi-bin/hgTracks?db=hg19&position=chr16:8321290-35131384&hgsid=443358811_uawFxZ8D0XFx7YCAwxfiOv0gYN64
16	46510261	58657607	613	-0.0624	http://genome.ucsc.edu/cgi-bin/hgTracks?db=hg19&position=chr16:46460261-58707607&hgsid=443358811_uawFxZ8D0XFx7YCAwxfiOv0gYN64
16	58661744	66299798	203	-0.1489	http://genome.ucsc.edu/cgi-bin/hgTracks?db=hg19&position=chr16:58611744-66349798&hgsid=443358811_uawFxZ8D0XFx7YCAwxfiOv0gYN64
16	66409731	75896915	876	-0.0272	http://genome.ucsc.edu/cgi-bin/hgTracks?db=hg19&position=chr16:66359731-75946915&hgsid=443358811_uawFxZ8D0XFx7YCAwxfiOv0gYN64
16	75921227	78079447	88	-0.1692	http://genome.ucsc.edu/cgi-bin/hgTracks?db=hg19&position=chr16:75871227-78129447&hgsid=443358811_uawFxZ8D0XFx7YCAwxfiOv0gYN64
16	78103513	78801033	58	-0.0518	http://genome.ucsc.edu/cgi-bin/hgTracks?db=hg19&position=chr16:78053513-78851033&hgsid=443358811_uawFxZ8D0XFx7YCAwxfiOv0gYN64
16	78803618	80676059	67	-0.1605	http://genome.ucsc.edu/cgi-bin/hgTracks?db=hg19&position=chr16:78753618-80726059&hgsid=443358811_uawFxZ8D0XFx7YCAwxfiOv0gYN64
16	80711354	81858889	104	-0.0596	http://genome.ucsc.edu/cgi-bin/hgTracks?db=hg19&position=chr16:80661354-81908889&hgsid=443358811_uawFxZ8D0XFx7YCAwxfiOv0gYN64
16	81867141	83893155	75	-0.1613	http://genome.ucsc.edu/cgi-bin/hgTracks?db=hg19&position=chr16:81817141-83943155&hgsid=443358811_uawFxZ8D0XFx7YCAwxfiOv0gYN64
16	83910622	90148140	615	-0.042	http://genome.ucsc.edu/cgi-bin/hgTracks?db=hg19&position=chr16:83860622-90198140&hgsid=443358811_uawFxZ8D0XFx7YCAwxfiOv0gYN64
17	15018	20238166	1573	-0.0512	http://genome.ucsc.edu/cgi-bin/hgTracks?db=hg19&position=chr17:-34982-20288166&hgsid=443358811_uawFxZ8D0XFx7YCAwxfiOv0gYN64
17	20527728	20843838	23	-0.2255	http://genome.ucsc.edu/cgi-bin/hgTracks?db=hg19&position=chr17:20477728-20893838&hgsid=443358811_uawFxZ8D0XFx7YCAwxfiOv0gYN64
17	20846451	22139608	47	-0.0721	http://genome.ucsc.edu/cgi-bin/hgTracks?db=hg19&position=chr17:20796451-22189608&hgsid=443358811_uawFxZ8D0XFx7YCAwxfiOv0gYN64
17	25290969	81098626	3638	-0.0456	http://genome.ucsc.edu/cgi-bin/hgTracks?db=hg19&position=chr17:25240969-81148626&hgsid=443358811_uawFxZ8D0XFx7YCAwxfiOv0gYN64
18	69211	4008913	210	-0.056	http://genome.ucsc.edu/cgi-bin/hgTracks?db=hg19&position=chr18:19211-4058913&hgsid=443358811_uawFxZ8D0XFx7YCAwxfiOv0gYN64
18	4030004	8591119	113	-0.1472	http://genome.ucsc.edu/cgi-bin/hgTracks?db=hg19&position=chr18:3980004-8641119&hgsid=443358811_uawFxZ8D0XFx7YCAwxfiOv0gYN64
18	8607828	15355951	280	-0.0446	http://genome.ucsc.edu/cgi-bin/hgTracks?db=hg19&position=chr18:8557828-15405951&hgsid=443358811_uawFxZ8D0XFx7YCAwxfiOv0gYN64
18	18548269	22701225	242	-0.0396	http://genome.ucsc.edu/cgi-bin/hgTracks?db=hg19&position=chr18:18498269-22751225&hgsid=443358811_uawFxZ8D0XFx7YCAwxfiOv0gYN64
18	22785954	23132500	4	-0.3742	http://genome.ucsc.edu/cgi-bin/hgTracks?db=hg19&position=chr18:22735954-23182500&hgsid=443358811_uawFxZ8D0XFx7YCAwxfiOv0gYN64
18	23142400	24048514	31	-0.0613	http://genome.ucsc.edu/cgi-bin/hgTracks?db=hg19&position=chr18:23092400-24098514&hgsid=443358811_uawFxZ8D0XFx7YCAwxfiOv0gYN64
18	24065915	27909714	63	-0.1693	http://genome.ucsc.edu/cgi-bin/hgTracks?db=hg19&position=chr18:24015915-27959714&hgsid=443358811_uawFxZ8D0XFx7YCAwxfiOv0gYN64
18	27935415	64434781	885	-0.0741	http://genome.ucsc.edu/cgi-bin/hgTracks?db=hg19&position=chr18:27885415-64484781&hgsid=443358811_uawFxZ8D0XFx7YCAwxfiOv0gYN64
18	64658758	65710691	20	-0.2558	http://genome.ucsc.edu/cgi-bin/hgTracks?db=hg19&position=chr18:64608758-65760691&hgsid=443358811_uawFxZ8D0XFx7YCAwxfiOv0gYN64
18	65781491	78014083	278	-0.0835	http://genome.ucsc.edu/cgi-bin/hgTracks?db=hg19&position=chr18:65731491-78064083&hgsid=443358811_uawFxZ8D0XFx7YCAwxfiOv0gYN64
19	260372	8125408	1425	-0.0524	http://genome.ucsc.edu/cgi-bin/hgTracks?db=hg19&position=chr19:210372-8175408&hgsid=443358811_uawFxZ8D0XFx7YCAwxfiOv0gYN64
19	8129951	8306209	23	-0.2378	http://genome.ucsc.edu/cgi-bin/hgTracks?db=hg19&position=chr19:8079951-8356209&hgsid=443358811_uawFxZ8D0XFx7YCAwxfiOv0gYN64
19	8311160	13292093	789	-0.0439	http://genome.ucsc.edu/cgi-bin/hgTracks?db=hg19&position=chr19:8261160-13342093&hgsid=443358811_uawFxZ8D0XFx7YCAwxfiOv0gYN64
19	13301190	13841681	57	-0.1796	http://genome.ucsc.edu/cgi-bin/hgTracks?db=hg19&position=chr19:13251190-13891681&hgsid=443358811_uawFxZ8D0XFx7YCAwxfiOv0gYN64
19	13856195	24361551	1233	-0.0612	http://genome.ucsc.edu/cgi-bin/hgTracks?db=hg19&position=chr19:13806195-24411551&hgsid=443358811_uawFxZ8D0XFx7YCAwxfiOv0gYN64
19	28282524	30586986	93	-0.1138	http://genome.ucsc.edu/cgi-bin/hgTracks?db=hg19&position=chr19:28232524-30636986&hgsid=443358811_uawFxZ8D0XFx7YCAwxfiOv0gYN64
19	30597045	31870155	30	-0.2677	http://genome.ucsc.edu/cgi-bin/hgTracks?db=hg19&position=chr19:30547045-31920155&hgsid=443358811_uawFxZ8D0XFx7YCAwxfiOv0gYN64
19	31952294	59088329	3208	-0.0529	http://genome.ucsc.edu/cgi-bin/hgTracks?db=hg19&position=chr19:31902294-59138329&hgsid=443358811_uawFxZ8D0XFx7YCAwxfiOv0gYN64
20	134165	26248042	1011	-0.0774	http://genome.ucsc.edu/cgi-bin/hgTracks?db=hg19&position=chr20:84165-26298042&hgsid=443358811_uawFxZ8D0XFx7YCAwxfiOv0gYN64
20	29583855	52833173	1761	-0.0554	http://genome.ucsc.edu/cgi-bin/hgTracks?db=hg19&position=chr20:29533855-52883173&hgsid=443358811_uawFxZ8D0XFx7YCAwxfiOv0gYN64
20	52882491	60413586	263	-0.1302	http://genome.ucsc.edu/cgi-bin/hgTracks?db=hg19&position=chr20:52832491-60463586&hgsid=443358811_uawFxZ8D0XFx7YCAwxfiOv0gYN64
20	60497813	62892786	200	-0.0542	http://genome.ucsc.edu/cgi-bin/hgTracks?db=hg19&position=chr20:60447813-62942786&hgsid=443358811_uawFxZ8D0XFx7YCAwxfiOv0gYN64
21	9421431	11186622	44	-0.1386	http://genome.ucsc.edu/cgi-bin/hgTracks?db=hg19&position=chr21:9371431-11236622&hgsid=443358811_uawFxZ8D0XFx7YCAwxfiOv0gYN64
21	14372868	17463943	51	-0.0556	http://genome.ucsc.edu/cgi-bin/hgTracks?db=hg19&position=chr21:14322868-17513943&hgsid=443358811_uawFxZ8D0XFx7YCAwxfiOv0gYN64
21	17493049	18708875	23	-0.1828	http://genome.ucsc.edu/cgi-bin/hgTracks?db=hg19&position=chr21:17443049-18758875&hgsid=443358811_uawFxZ8D0XFx7YCAwxfiOv0gYN64
21	18766555	19256554	39	-0.0054	http://genome.ucsc.edu/cgi-bin/hgTracks?db=hg19&position=chr21:18716555-19306554&hgsid=443358811_uawFxZ8D0XFx7YCAwxfiOv0gYN64
21	19263403	26675572	214	-0.1538	http://genome.ucsc.edu/cgi-bin/hgTracks?db=hg19&position=chr21:19213403-26725572&hgsid=443358811_uawFxZ8D0XFx7YCAwxfiOv0gYN64
21	26700163	28882481	82	-0.07	http://genome.ucsc.edu/cgi-bin/hgTracks?db=hg19&position=chr21:26650163-28932481&hgsid=443358811_uawFxZ8D0XFx7YCAwxfiOv0gYN64
21	28928943	29209026	9	-0.2807	http://genome.ucsc.edu/cgi-bin/hgTracks?db=hg19&position=chr21:28878943-29259026&hgsid=443358811_uawFxZ8D0XFx7YCAwxfiOv0gYN64
21	29286054	30913292	56	-0.0641	http://genome.ucsc.edu/cgi-bin/hgTracks?db=hg19&position=chr21:29236054-30963292&hgsid=443358811_uawFxZ8D0XFx7YCAwxfiOv0gYN64
21	30961745	33006192	82	-0.1711	http://genome.ucsc.edu/cgi-bin/hgTracks?db=hg19&position=chr21:30911745-33056192&hgsid=443358811_uawFxZ8D0XFx7YCAwxfiOv0gYN64
21	33015006	40889691	402	-0.0332	http://genome.ucsc.edu/cgi-bin/hgTracks?db=hg19&position=chr21:32965006-40939691&hgsid=443358811_uawFxZ8D0XFx7YCAwxfiOv0gYN64
21	40902742	42436983	38	-0.1853	http://genome.ucsc.edu/cgi-bin/hgTracks?db=hg19&position=chr21:40852742-42486983&hgsid=443358811_uawFxZ8D0XFx7YCAwxfiOv0gYN64
21	42445041	48064866	336	-0.0448	http://genome.ucsc.edu/cgi-bin/hgTracks?db=hg19&position=chr21:42395041-48114866&hgsid=443358811_uawFxZ8D0XFx7YCAwxfiOv0gYN64
22	16926329	28622405	691	-0.0598	http://genome.ucsc.edu/cgi-bin/hgTracks?db=hg19&position=chr22:16876329-28672405&hgsid=443358811_uawFxZ8D0XFx7YCAwxfiOv0gYN64
22	28684514	29058957	22	-0.2414	http://genome.ucsc.edu/cgi-bin/hgTracks?db=hg19&position=chr22:28634514-29108957&hgsid=443358811_uawFxZ8D0XFx7YCAwxfiOv0gYN64
22	29074221	48562073	1572	-0.0389	http://genome.ucsc.edu/cgi-bin/hgTracks?db=hg19&position=chr22:29024221-48612073&hgsid=443358811_uawFxZ8D0XFx7YCAwxfiOv0gYN64
22	48651517	50146733	36	-0.1704	http://genome.ucsc.edu/cgi-bin/hgTracks?db=hg19&position=chr22:48601517-50196733&hgsid=443358811_uawFxZ8D0XFx7YCAwxfiOv0gYN64
22	50189998	51146491	113	-0.0417	http://genome.ucsc.edu/cgi-bin/hgTracks?db=hg19&position=chr22:50139998-51196491&hgsid=443358811_uawFxZ8D0XFx7YCAwxfiOv0gYN64
23	150326	3737431	397	-0.0652	http://genome.ucsc.edu/cgi-bin/hgTracks?db=hg19&position=chr23:100326-3787431&hgsid=443358811_uawFxZ8D0XFx7YCAwxfiOv0gYN64
23	3951933	6511750	74	-0.194	http://genome.ucsc.edu/cgi-bin/hgTracks?db=hg19&position=chr23:3901933-6561750&hgsid=443358811_uawFxZ8D0XFx7YCAwxfiOv0gYN64
23	6543007	58003859	1254	-0.0697	http://genome.ucsc.edu/cgi-bin/hgTracks?db=hg19&position=chr23:6493007-58053859&hgsid=443358811_uawFxZ8D0XFx7YCAwxfiOv0gYN64
23	62253658	155221007	1500	-0.0882	http://genome.ucsc.edu/cgi-bin/hgTracks?db=hg19&position=chr23:62203658-155271007&hgsid=443358811_uawFxZ8D0XFx7YCAwxfiOv0gYN64
24	7414009	10022029	2	-0.1033	http://genome.ucsc.edu/cgi-bin/hgTracks?db=hg19&position=chr24:7364009-10072029&hgsid=443358811_uawFxZ8D0XFx7YCAwxfiOv0gYN64
24	25207542	59026041	3	-0.0967	http://genome.ucsc.edu/cgi-bin/hgTracks?db=hg19&position=chr24:25157542-59076041&hgsid=443358811_uawFxZ8D0XFx7YCAwxfiOv0gYN64

## Sheet: cancer1
chr	loc.start	loc.end	num.mark	seg.mean
1	705685	121159262	5503	-0.0291	http://genome.ucsc.edu/cgi-bin/hgTracks?db=hg19&position=chr1:655685-121209262&hgsid=443358811_uawFxZ8D0XFx7YCAwxfiOv0gYN64
1	142646941	249177775	4315	-0.0331	http://genome.ucsc.edu/cgi-bin/hgTracks?db=hg19&position=chr1:142596941-249227775&hgsid=443358811_uawFxZ8D0XFx7YCAwxfiOv0gYN64
2	13950	92199980	3632	-0.0332	http://genome.ucsc.edu/cgi-bin/hgTracks?db=hg19&position=chr2:-36050-92249980&hgsid=443358811_uawFxZ8D0XFx7YCAwxfiOv0gYN64
2	95528604	243016749	5029	-0.0372	http://genome.ucsc.edu/cgi-bin/hgTracks?db=hg19&position=chr2:95478604-243066749&hgsid=443358811_uawFxZ8D0XFx7YCAwxfiOv0gYN64
3	129284	3106253	83	-0.1378	http://genome.ucsc.edu/cgi-bin/hgTracks?db=hg19&position=chr3:79284-3156253&hgsid=443358811_uawFxZ8D0XFx7YCAwxfiOv0gYN64
3	3107176	90352947	3351	-0.0342	http://genome.ucsc.edu/cgi-bin/hgTracks?db=hg19&position=chr3:3057176-90402947&hgsid=443358811_uawFxZ8D0XFx7YCAwxfiOv0gYN64
3	93529821	197839077	3636	-0.0375	http://genome.ucsc.edu/cgi-bin/hgTracks?db=hg19&position=chr3:93479821-197889077&hgsid=443358811_uawFxZ8D0XFx7YCAwxfiOv0gYN64
4	35032	49160453	1735	-0.0365	http://genome.ucsc.edu/cgi-bin/hgTracks?db=hg19&position=chr4:-14968-49210453&hgsid=443358811_uawFxZ8D0XFx7YCAwxfiOv0gYN64
4	52713789	191033113	3588	-0.0461	http://genome.ucsc.edu/cgi-bin/hgTracks?db=hg19&position=chr4:52663789-191083113&hgsid=443358811_uawFxZ8D0XFx7YCAwxfiOv0gYN64
5	13855	46104940	1381	-0.0505	http://genome.ucsc.edu/cgi-bin/hgTracks?db=hg19&position=chr5:-36145-46154940&hgsid=443358811_uawFxZ8D0XFx7YCAwxfiOv0gYN64
5	49443126	180698548	4371	-0.033	http://genome.ucsc.edu/cgi-bin/hgTracks?db=hg19&position=chr5:49393126-180748548&hgsid=443358811_uawFxZ8D0XFx7YCAwxfiOv0gYN64
6	238812	58706852	3027	-0.0332	http://genome.ucsc.edu/cgi-bin/hgTracks?db=hg19&position=chr6:188812-58756852&hgsid=443358811_uawFxZ8D0XFx7YCAwxfiOv0gYN64
6	61978733	170906804	3544	-0.0497	http://genome.ucsc.edu/cgi-bin/hgTracks?db=hg19&position=chr6:61928733-170956804&hgsid=443358811_uawFxZ8D0XFx7YCAwxfiOv0gYN64
7	151335	57857193	2586	-0.0495	http://genome.ucsc.edu/cgi-bin/hgTracks?db=hg19&position=chr7:101335-57907193&hgsid=443358811_uawFxZ8D0XFx7YCAwxfiOv0gYN64
7	62191440	159049287	4754	-0.0382	http://genome.ucsc.edu/cgi-bin/hgTracks?db=hg19&position=chr7:62141440-159099287&hgsid=443358811_uawFxZ8D0XFx7YCAwxfiOv0gYN64
8	171734	43546429	1941	-0.0442	http://genome.ucsc.edu/cgi-bin/hgTracks?db=hg19&position=chr8:121734-43596429&hgsid=443358811_uawFxZ8D0XFx7YCAwxfiOv0gYN64
8	46941942	146276311	3224	-0.0517	http://genome.ucsc.edu/cgi-bin/hgTracks?db=hg19&position=chr8:46891942-146326311&hgsid=443358811_uawFxZ8D0XFx7YCAwxfiOv0gYN64
9	213732	44898559	1441	-0.0395	http://genome.ucsc.edu/cgi-bin/hgTracks?db=hg19&position=chr9:163732-44948559&hgsid=443358811_uawFxZ8D0XFx7YCAwxfiOv0gYN64
9	65604940	141004890	3279	-0.0313	http://genome.ucsc.edu/cgi-bin/hgTracks?db=hg19&position=chr9:65554940-141054890&hgsid=443358811_uawFxZ8D0XFx7YCAwxfiOv0gYN64
10	146905	38915103	2071	-0.047	http://genome.ucsc.edu/cgi-bin/hgTracks?db=hg19&position=chr10:96905-38965103&hgsid=443358811_uawFxZ8D0XFx7YCAwxfiOv0gYN64
10	42866696	110939330	2625	-0.0405	http://genome.ucsc.edu/cgi-bin/hgTracks?db=hg19&position=chr10:42816696-110989330&hgsid=443358811_uawFxZ8D0XFx7YCAwxfiOv0gYN64
10	110967614	111046654	3	-0.71	http://genome.ucsc.edu/cgi-bin/hgTracks?db=hg19&position=chr10:110917614-111096654&hgsid=443358811_uawFxZ8D0XFx7YCAwxfiOv0gYN64
10	111051701	135274018	823	-0.0309	http://genome.ucsc.edu/cgi-bin/hgTracks?db=hg19&position=chr10:111001701-135324018&hgsid=443358811_uawFxZ8D0XFx7YCAwxfiOv0gYN64
11	201303	50276359	1739	-0.0413	http://genome.ucsc.edu/cgi-bin/hgTracks?db=hg19&position=chr11:151303-50326359&hgsid=443358811_uawFxZ8D0XFx7YCAwxfiOv0gYN64
11	55305519	134939058	3214	-0.0318	http://genome.ucsc.edu/cgi-bin/hgTracks?db=hg19&position=chr11:55255519-134989058&hgsid=443358811_uawFxZ8D0XFx7YCAwxfiOv0gYN64
12	200659	34415851	1557	-0.0385	http://genome.ucsc.edu/cgi-bin/hgTracks?db=hg19&position=chr12:150659-34465851&hgsid=443358811_uawFxZ8D0XFx7YCAwxfiOv0gYN64
12	37949574	133813300	4560	-0.0342	http://genome.ucsc.edu/cgi-bin/hgTracks?db=hg19&position=chr12:37899574-133863300&hgsid=443358811_uawFxZ8D0XFx7YCAwxfiOv0gYN64
13	19402378	115093261	3619	-0.055	http://genome.ucsc.edu/cgi-bin/hgTracks?db=hg19&position=chr13:19352378-115143261&hgsid=443358811_uawFxZ8D0XFx7YCAwxfiOv0gYN64
14	19100807	107268113	3404	-0.0269	http://genome.ucsc.edu/cgi-bin/hgTracks?db=hg19&position=chr14:19050807-107318113&hgsid=443358811_uawFxZ8D0XFx7YCAwxfiOv0gYN64
15	20065002	23790049	101	-0.0434	http://genome.ucsc.edu/cgi-bin/hgTracks?db=hg19&position=chr15:20015002-23840049&hgsid=443358811_uawFxZ8D0XFx7YCAwxfiOv0gYN64
15	23793590	23825247	2	-0.915	http://genome.ucsc.edu/cgi-bin/hgTracks?db=hg19&position=chr15:23743590-23875247&hgsid=443358811_uawFxZ8D0XFx7YCAwxfiOv0gYN64
15	23842701	102359691	3485	-0.0247	http://genome.ucsc.edu/cgi-bin/hgTracks?db=hg19&position=chr15:23792701-102409691&hgsid=443358811_uawFxZ8D0XFx7YCAwxfiOv0gYN64
16	89487	35081384	2917	-0.0373	http://genome.ucsc.edu/cgi-bin/hgTracks?db=hg19&position=chr16:39487-35131384&hgsid=443358811_uawFxZ8D0XFx7YCAwxfiOv0gYN64
16	46510261	90148140	2699	-0.0366	http://genome.ucsc.edu/cgi-bin/hgTracks?db=hg19&position=chr16:46460261-90198140&hgsid=443358811_uawFxZ8D0XFx7YCAwxfiOv0gYN64
17	15018	22139608	1643	-0.0353	http://genome.ucsc.edu/cgi-bin/hgTracks?db=hg19&position=chr17:-34982-22189608&hgsid=443358811_uawFxZ8D0XFx7YCAwxfiOv0gYN64
17	25290969	81098626	3638	-0.0231	http://genome.ucsc.edu/cgi-bin/hgTracks?db=hg19&position=chr17:25240969-81148626&hgsid=443358811_uawFxZ8D0XFx7YCAwxfiOv0gYN64
18	69211	15355951	603	-0.0405	http://genome.ucsc.edu/cgi-bin/hgTracks?db=hg19&position=chr18:19211-15405951&hgsid=443358811_uawFxZ8D0XFx7YCAwxfiOv0gYN64
18	18548269	78014083	1523	-0.0357	http://genome.ucsc.edu/cgi-bin/hgTracks?db=hg19&position=chr18:18498269-78064083&hgsid=443358811_uawFxZ8D0XFx7YCAwxfiOv0gYN64
19	260372	24361551	3527	-0.0324	http://genome.ucsc.edu/cgi-bin/hgTracks?db=hg19&position=chr19:210372-24411551&hgsid=443358811_uawFxZ8D0XFx7YCAwxfiOv0gYN64
19	28282524	59088329	3331	-0.0267	http://genome.ucsc.edu/cgi-bin/hgTracks?db=hg19&position=chr19:28232524-59138329&hgsid=443358811_uawFxZ8D0XFx7YCAwxfiOv0gYN64
20	134165	26248042	1011	-0.0459	http://genome.ucsc.edu/cgi-bin/hgTracks?db=hg19&position=chr20:84165-26298042&hgsid=443358811_uawFxZ8D0XFx7YCAwxfiOv0gYN64
20	29583855	55226458	1858	-0.0372	http://genome.ucsc.edu/cgi-bin/hgTracks?db=hg19&position=chr20:29533855-55276458&hgsid=443358811_uawFxZ8D0XFx7YCAwxfiOv0gYN64
20	55245175	55425209	17	-0.3065	http://genome.ucsc.edu/cgi-bin/hgTracks?db=hg19&position=chr20:55195175-55475209&hgsid=443358811_uawFxZ8D0XFx7YCAwxfiOv0gYN64
20	55428045	61586476	230	-0.0502	http://genome.ucsc.edu/cgi-bin/hgTracks?db=hg19&position=chr20:55378045-61636476&hgsid=443358811_uawFxZ8D0XFx7YCAwxfiOv0gYN64
20	61605030	61623644	3	-0.6933	http://genome.ucsc.edu/cgi-bin/hgTracks?db=hg19&position=chr20:61555030-61673644&hgsid=443358811_uawFxZ8D0XFx7YCAwxfiOv0gYN64
20	61633599	62892786	116	-0.0211	http://genome.ucsc.edu/cgi-bin/hgTracks?db=hg19&position=chr20:61583599-62942786&hgsid=443358811_uawFxZ8D0XFx7YCAwxfiOv0gYN64
21	9421431	11186622	44	-0.0766	http://genome.ucsc.edu/cgi-bin/hgTracks?db=hg19&position=chr21:9371431-11236622&hgsid=443358811_uawFxZ8D0XFx7YCAwxfiOv0gYN64
21	14372868	48064866	1332	-0.0385	http://genome.ucsc.edu/cgi-bin/hgTracks?db=hg19&position=chr21:14322868-48114866&hgsid=443358811_uawFxZ8D0XFx7YCAwxfiOv0gYN64
22	16926329	51146491	2434	-0.0246	http://genome.ucsc.edu/cgi-bin/hgTracks?db=hg19&position=chr22:16876329-51196491&hgsid=443358811_uawFxZ8D0XFx7YCAwxfiOv0gYN64
23	150326	58003859	1725	-0.0374	http://genome.ucsc.edu/cgi-bin/hgTracks?db=hg19&position=chr23:100326-58053859&hgsid=443358811_uawFxZ8D0XFx7YCAwxfiOv0gYN64
23	62253658	155221007	1500	-0.0548	http://genome.ucsc.edu/cgi-bin/hgTracks?db=hg19&position=chr23:62203658-155271007&hgsid=443358811_uawFxZ8D0XFx7YCAwxfiOv0gYN64
24	7414009	10022029	2	0.005	http://genome.ucsc.edu/cgi-bin/hgTracks?db=hg19&position=chr24:7364009-10072029&hgsid=443358811_uawFxZ8D0XFx7YCAwxfiOv0gYN64
24	25207542	59026041	3	-0.1667	http://genome.ucsc.edu/cgi-bin/hgTracks?db=hg19&position=chr24:25157542-59076041&hgsid=443358811_uawFxZ8D0XFx7YCAwxfiOv0gYN64

## Sheet: cancer2
chr	loc.start	loc.end	num.mark	seg.mean
1	705685	78707448	4335	-0.0523	http://genome.ucsc.edu/cgi-bin/hgTracks?db=hg19&position=chr1:655685-78757448&hgsid=443358811_uawFxZ8D0XFx7YCAwxfiOv0gYN64
1	78906935	84571226	107	-0.1881	http://genome.ucsc.edu/cgi-bin/hgTracks?db=hg19&position=chr1:78856935-84621226&hgsid=443358811_uawFxZ8D0XFx7YCAwxfiOv0gYN64
1	84596759	101570540	525	-0.0503	http://genome.ucsc.edu/cgi-bin/hgTracks?db=hg19&position=chr1:84546759-101620540&hgsid=443358811_uawFxZ8D0XFx7YCAwxfiOv0gYN64
1	101642090	109282941	149	-0.1974	http://genome.ucsc.edu/cgi-bin/hgTracks?db=hg19&position=chr1:101592090-109332941&hgsid=443358811_uawFxZ8D0XFx7YCAwxfiOv0gYN64
1	109287740	121159262	387	-0.044	http://genome.ucsc.edu/cgi-bin/hgTracks?db=hg19&position=chr1:109237740-121209262&hgsid=443358811_uawFxZ8D0XFx7YCAwxfiOv0gYN64
1	142646941	187340051	1784	-0.0479	http://genome.ucsc.edu/cgi-bin/hgTracks?db=hg19&position=chr1:142596941-187390051&hgsid=443358811_uawFxZ8D0XFx7YCAwxfiOv0gYN64
1	187342973	191686327	124	-0.209	http://genome.ucsc.edu/cgi-bin/hgTracks?db=hg19&position=chr1:187292973-191736327&hgsid=443358811_uawFxZ8D0XFx7YCAwxfiOv0gYN64
1	191720649	249177775	2407	-0.0673	http://genome.ucsc.edu/cgi-bin/hgTracks?db=hg19&position=chr1:191670649-249227775&hgsid=443358811_uawFxZ8D0XFx7YCAwxfiOv0gYN64
2	13950	7820335	157	-0.1425	http://genome.ucsc.edu/cgi-bin/hgTracks?db=hg19&position=chr2:-36050-7870335&hgsid=443358811_uawFxZ8D0XFx7YCAwxfiOv0gYN64
2	7846360	11431394	221	-0.0113	http://genome.ucsc.edu/cgi-bin/hgTracks?db=hg19&position=chr2:7796360-11481394&hgsid=443358811_uawFxZ8D0XFx7YCAwxfiOv0gYN64
2	11503495	23246794	304	-0.1247	http://genome.ucsc.edu/cgi-bin/hgTracks?db=hg19&position=chr2:11453495-23296794&hgsid=443358811_uawFxZ8D0XFx7YCAwxfiOv0gYN64
2	23283877	75253890	2515	-0.0492	http://genome.ucsc.edu/cgi-bin/hgTracks?db=hg19&position=chr2:23233877-75303890&hgsid=443358811_uawFxZ8D0XFx7YCAwxfiOv0gYN64
2	75364570	92199980	435	-0.1066	http://genome.ucsc.edu/cgi-bin/hgTracks?db=hg19&position=chr2:75314570-92249980&hgsid=443358811_uawFxZ8D0XFx7YCAwxfiOv0gYN64
2	95528604	100200648	202	-0.0452	http://genome.ucsc.edu/cgi-bin/hgTracks?db=hg19&position=chr2:95478604-100250648&hgsid=443358811_uawFxZ8D0XFx7YCAwxfiOv0gYN64
2	100215714	101180378	36	-0.2669	http://genome.ucsc.edu/cgi-bin/hgTracks?db=hg19&position=chr2:100165714-101230378&hgsid=443358811_uawFxZ8D0XFx7YCAwxfiOv0gYN64
2	101187452	136888894	1225	-0.0745	http://genome.ucsc.edu/cgi-bin/hgTracks?db=hg19&position=chr2:101137452-136938894&hgsid=443358811_uawFxZ8D0XFx7YCAwxfiOv0gYN64
2	136892419	148012368	193	-0.1752	http://genome.ucsc.edu/cgi-bin/hgTracks?db=hg19&position=chr2:136842419-148062368&hgsid=443358811_uawFxZ8D0XFx7YCAwxfiOv0gYN64
2	148058584	220532757	2365	-0.0795	http://genome.ucsc.edu/cgi-bin/hgTracks?db=hg19&position=chr2:148008584-220582757&hgsid=443358811_uawFxZ8D0XFx7YCAwxfiOv0gYN64
2	220552460	223295931	56	-0.2402	http://genome.ucsc.edu/cgi-bin/hgTracks?db=hg19&position=chr2:220502460-223345931&hgsid=443358811_uawFxZ8D0XFx7YCAwxfiOv0gYN64
2	223322761	243016749	952	-0.0497	http://genome.ucsc.edu/cgi-bin/hgTracks?db=hg19&position=chr2:223272761-243066749&hgsid=443358811_uawFxZ8D0XFx7YCAwxfiOv0gYN64
3	129284	4664102	116	-0.1797	http://genome.ucsc.edu/cgi-bin/hgTracks?db=hg19&position=chr3:79284-4714102&hgsid=443358811_uawFxZ8D0XFx7YCAwxfiOv0gYN64
3	4910883	73262408	2927	-0.0569	http://genome.ucsc.edu/cgi-bin/hgTracks?db=hg19&position=chr3:4860883-73312408&hgsid=443358811_uawFxZ8D0XFx7YCAwxfiOv0gYN64
3	73307876	90352947	391	-0.1449	http://genome.ucsc.edu/cgi-bin/hgTracks?db=hg19&position=chr3:73257876-90402947&hgsid=443358811_uawFxZ8D0XFx7YCAwxfiOv0gYN64
3	93529821	160841688	2008	-0.0711	http://genome.ucsc.edu/cgi-bin/hgTracks?db=hg19&position=chr3:93479821-160891688&hgsid=443358811_uawFxZ8D0XFx7YCAwxfiOv0gYN64
3	160855926	167664623	129	-0.1873	http://genome.ucsc.edu/cgi-bin/hgTracks?db=hg19&position=chr3:160805926-167714623&hgsid=443358811_uawFxZ8D0XFx7YCAwxfiOv0gYN64
3	167760030	190308035	959	-0.0504	http://genome.ucsc.edu/cgi-bin/hgTracks?db=hg19&position=chr3:167710030-190358035&hgsid=443358811_uawFxZ8D0XFx7YCAwxfiOv0gYN64
3	190408414	192350823	59	-0.218	http://genome.ucsc.edu/cgi-bin/hgTracks?db=hg19&position=chr3:190358414-192400823&hgsid=443358811_uawFxZ8D0XFx7YCAwxfiOv0gYN64
3	192367338	197839077	481	-0.0367	http://genome.ucsc.edu/cgi-bin/hgTracks?db=hg19&position=chr3:192317338-197889077&hgsid=443358811_uawFxZ8D0XFx7YCAwxfiOv0gYN64
4	35032	4769511	316	-0.0503	http://genome.ucsc.edu/cgi-bin/hgTracks?db=hg19&position=chr4:-14968-4819511&hgsid=443358811_uawFxZ8D0XFx7YCAwxfiOv0gYN64
4	4801788	6054092	29	-0.2724	http://genome.ucsc.edu/cgi-bin/hgTracks?db=hg19&position=chr4:4751788-6104092&hgsid=443358811_uawFxZ8D0XFx7YCAwxfiOv0gYN64
4	6074559	11818385	190	-0.0461	http://genome.ucsc.edu/cgi-bin/hgTracks?db=hg19&position=chr4:6024559-11868385&hgsid=443358811_uawFxZ8D0XFx7YCAwxfiOv0gYN64
4	11847034	36685436	651	-0.1325	http://genome.ucsc.edu/cgi-bin/hgTracks?db=hg19&position=chr4:11797034-36735436&hgsid=443358811_uawFxZ8D0XFx7YCAwxfiOv0gYN64
4	36729847	42259165	385	-0.0358	http://genome.ucsc.edu/cgi-bin/hgTracks?db=hg19&position=chr4:36679847-42309165&hgsid=443358811_uawFxZ8D0XFx7YCAwxfiOv0gYN64
4	42263649	46698698	85	-0.1782	http://genome.ucsc.edu/cgi-bin/hgTracks?db=hg19&position=chr4:42213649-46748698&hgsid=443358811_uawFxZ8D0XFx7YCAwxfiOv0gYN64
4	46746756	49160453	79	-0.0256	http://genome.ucsc.edu/cgi-bin/hgTracks?db=hg19&position=chr4:46696756-49210453&hgsid=443358811_uawFxZ8D0XFx7YCAwxfiOv0gYN64
4	52713789	191033113	3588	-0.0837	http://genome.ucsc.edu/cgi-bin/hgTracks?db=hg19&position=chr4:52663789-191083113&hgsid=443358811_uawFxZ8D0XFx7YCAwxfiOv0gYN64
5	13855	46104940	1381	-0.1002	http://genome.ucsc.edu/cgi-bin/hgTracks?db=hg19&position=chr5:-36145-46154940&hgsid=443358811_uawFxZ8D0XFx7YCAwxfiOv0gYN64
5	49443126	180698548	4371	-0.0661	http://genome.ucsc.edu/cgi-bin/hgTracks?db=hg19&position=chr5:49393126-180748548&hgsid=443358811_uawFxZ8D0XFx7YCAwxfiOv0gYN64
6	238812	58706852	3027	-0.0555	http://genome.ucsc.edu/cgi-bin/hgTracks?db=hg19&position=chr6:188812-58756852&hgsid=443358811_uawFxZ8D0XFx7YCAwxfiOv0gYN64
6	61978733	170906804	3544	-0.0798	http://genome.ucsc.edu/cgi-bin/hgTracks?db=hg19&position=chr6:61928733-170956804&hgsid=443358811_uawFxZ8D0XFx7YCAwxfiOv0gYN64
7	151335	52373018	2354	-0.0871	http://genome.ucsc.edu/cgi-bin/hgTracks?db=hg19&position=chr7:101335-52423018&hgsid=443358811_uawFxZ8D0XFx7YCAwxfiOv0gYN64
7	52409500	54759500	54	-0.2561	http://genome.ucsc.edu/cgi-bin/hgTracks?db=hg19&position=chr7:52359500-54809500&hgsid=443358811_uawFxZ8D0XFx7YCAwxfiOv0gYN64
7	54786564	57857193	178	-0.0663	http://genome.ucsc.edu/cgi-bin/hgTracks?db=hg19&position=chr7:54736564-57907193&hgsid=443358811_uawFxZ8D0XFx7YCAwxfiOv0gYN64
7	62191440	66857352	310	-0.0514	http://genome.ucsc.edu/cgi-bin/hgTracks?db=hg19&position=chr7:62141440-66907352&hgsid=443358811_uawFxZ8D0XFx7YCAwxfiOv0gYN64
7	66874485	69466109	196	-0.187	http://genome.ucsc.edu/cgi-bin/hgTracks?db=hg19&position=chr7:66824485-69516109&hgsid=443358811_uawFxZ8D0XFx7YCAwxfiOv0gYN64
7	69469796	70189430	45	-0.0204	http://genome.ucsc.edu/cgi-bin/hgTracks?db=hg19&position=chr7:69419796-70239430&hgsid=443358811_uawFxZ8D0XFx7YCAwxfiOv0gYN64
7	70194887	72006282	165	-0.1884	http://genome.ucsc.edu/cgi-bin/hgTracks?db=hg19&position=chr7:70144887-72056282&hgsid=443358811_uawFxZ8D0XFx7YCAwxfiOv0gYN64
7	72038581	77307697	484	-0.0432	http://genome.ucsc.edu/cgi-bin/hgTracks?db=hg19&position=chr7:71988581-77357697&hgsid=443358811_uawFxZ8D0XFx7YCAwxfiOv0gYN64
7	77308362	77323945	7	-0.53	http://genome.ucsc.edu/cgi-bin/hgTracks?db=hg19&position=chr7:77258362-77373945&hgsid=443358811_uawFxZ8D0XFx7YCAwxfiOv0gYN64
7	77330192	159049287	3547	-0.0702	http://genome.ucsc.edu/cgi-bin/hgTracks?db=hg19&position=chr7:77280192-159099287&hgsid=443358811_uawFxZ8D0XFx7YCAwxfiOv0gYN64
8	171734	31062693	1430	-0.0924	http://genome.ucsc.edu/cgi-bin/hgTracks?db=hg19&position=chr8:121734-31112693&hgsid=443358811_uawFxZ8D0XFx7YCAwxfiOv0gYN64
8	31063360	36930076	152	-0.1784	http://genome.ucsc.edu/cgi-bin/hgTracks?db=hg19&position=chr8:31013360-36980076&hgsid=443358811_uawFxZ8D0XFx7YCAwxfiOv0gYN64
8	36946638	43546429	359	-0.0629	http://genome.ucsc.edu/cgi-bin/hgTracks?db=hg19&position=chr8:36896638-43596429&hgsid=443358811_uawFxZ8D0XFx7YCAwxfiOv0gYN64
8	46941942	146276311	3224	-0.0796	http://genome.ucsc.edu/cgi-bin/hgTracks?db=hg19&position=chr8:46891942-146326311&hgsid=443358811_uawFxZ8D0XFx7YCAwxfiOv0gYN64
9	213732	8922639	372	-0.049	http://genome.ucsc.edu/cgi-bin/hgTracks?db=hg19&position=chr9:163732-8972639&hgsid=443358811_uawFxZ8D0XFx7YCAwxfiOv0gYN64
9	8923030	32406338	604	-0.1217	http://genome.ucsc.edu/cgi-bin/hgTracks?db=hg19&position=chr9:8873030-32456338&hgsid=443358811_uawFxZ8D0XFx7YCAwxfiOv0gYN64
9	32413204	44898559	465	-0.0439	http://genome.ucsc.edu/cgi-bin/hgTracks?db=hg19&position=chr9:32363204-44948559&hgsid=443358811_uawFxZ8D0XFx7YCAwxfiOv0gYN64
9	65604940	141004890	3279	-0.0597	http://genome.ucsc.edu/cgi-bin/hgTracks?db=hg19&position=chr9:65554940-141054890&hgsid=443358811_uawFxZ8D0XFx7YCAwxfiOv0gYN64
10	146905	38915103	2071	-0.0731	http://genome.ucsc.edu/cgi-bin/hgTracks?db=hg19&position=chr10:96905-38965103&hgsid=443358811_uawFxZ8D0XFx7YCAwxfiOv0gYN64
10	42866696	135274018	3451	-0.0637	http://genome.ucsc.edu/cgi-bin/hgTracks?db=hg19&position=chr10:42816696-135324018&hgsid=443358811_uawFxZ8D0XFx7YCAwxfiOv0gYN64
11	201303	50276359	1739	-0.0795	http://genome.ucsc.edu/cgi-bin/hgTracks?db=hg19&position=chr11:151303-50326359&hgsid=443358811_uawFxZ8D0XFx7YCAwxfiOv0gYN64
11	55305519	57419654	69	-0.1674	http://genome.ucsc.edu/cgi-bin/hgTracks?db=hg19&position=chr11:55255519-57469654&hgsid=443358811_uawFxZ8D0XFx7YCAwxfiOv0gYN64
11	57421218	134939058	3145	-0.0691	http://genome.ucsc.edu/cgi-bin/hgTracks?db=hg19&position=chr11:57371218-134989058&hgsid=443358811_uawFxZ8D0XFx7YCAwxfiOv0gYN64
12	200659	7916018	463	-0.0512	http://genome.ucsc.edu/cgi-bin/hgTracks?db=hg19&position=chr12:150659-7966018&hgsid=443358811_uawFxZ8D0XFx7YCAwxfiOv0gYN64
12	7919174	10277516	155	-0.1465	http://genome.ucsc.edu/cgi-bin/hgTracks?db=hg19&position=chr12:7869174-10327516&hgsid=443358811_uawFxZ8D0XFx7YCAwxfiOv0gYN64
12	10299422	20101134	407	-0.0332	http://genome.ucsc.edu/cgi-bin/hgTracks?db=hg19&position=chr12:10249422-20151134&hgsid=443358811_uawFxZ8D0XFx7YCAwxfiOv0gYN64
12	20103263	27032836	217	-0.1403	http://genome.ucsc.edu/cgi-bin/hgTracks?db=hg19&position=chr12:20053263-27082836&hgsid=443358811_uawFxZ8D0XFx7YCAwxfiOv0gYN64
12	27074601	34415851	315	-0.0278	http://genome.ucsc.edu/cgi-bin/hgTracks?db=hg19&position=chr12:27024601-34465851&hgsid=443358811_uawFxZ8D0XFx7YCAwxfiOv0gYN64
12	37949574	83609604	1795	-0.0626	http://genome.ucsc.edu/cgi-bin/hgTracks?db=hg19&position=chr12:37899574-83659604&hgsid=443358811_uawFxZ8D0XFx7YCAwxfiOv0gYN64
12	83635536	87720375	79	-0.2032	http://genome.ucsc.edu/cgi-bin/hgTracks?db=hg19&position=chr12:83585536-87770375&hgsid=443358811_uawFxZ8D0XFx7YCAwxfiOv0gYN64
12	87723660	133813300	2686	-0.0609	http://genome.ucsc.edu/cgi-bin/hgTracks?db=hg19&position=chr12:87673660-133863300&hgsid=443358811_uawFxZ8D0XFx7YCAwxfiOv0gYN64
13	19402378	54953011	1630	-0.062	http://genome.ucsc.edu/cgi-bin/hgTracks?db=hg19&position=chr13:19352378-55003011&hgsid=443358811_uawFxZ8D0XFx7YCAwxfiOv0gYN64
13	54997161	71335956	450	-0.1654	http://genome.ucsc.edu/cgi-bin/hgTracks?db=hg19&position=chr13:54947161-71385956&hgsid=443358811_uawFxZ8D0XFx7YCAwxfiOv0gYN64
13	71341285	74301832	130	-0.0075	http://genome.ucsc.edu/cgi-bin/hgTracks?db=hg19&position=chr13:71291285-74351832&hgsid=443358811_uawFxZ8D0XFx7YCAwxfiOv0gYN64
13	74352484	97101226	729	-0.1426	http://genome.ucsc.edu/cgi-bin/hgTracks?db=hg19&position=chr13:74302484-97151226&hgsid=443358811_uawFxZ8D0XFx7YCAwxfiOv0gYN64
13	97118256	103545619	299	-0.0411	http://genome.ucsc.edu/cgi-bin/hgTracks?db=hg19&position=chr13:97068256-103595619&hgsid=443358811_uawFxZ8D0XFx7YCAwxfiOv0gYN64
13	103563074	106236661	80	-0.1952	http://genome.ucsc.edu/cgi-bin/hgTracks?db=hg19&position=chr13:103513074-106286661&hgsid=443358811_uawFxZ8D0XFx7YCAwxfiOv0gYN64
13	106239614	115093261	301	-0.0674	http://genome.ucsc.edu/cgi-bin/hgTracks?db=hg19&position=chr13:106189614-115143261&hgsid=443358811_uawFxZ8D0XFx7YCAwxfiOv0gYN64
14	19100807	25613831	284	-0.0651	http://genome.ucsc.edu/cgi-bin/hgTracks?db=hg19&position=chr14:19050807-25663831&hgsid=443358811_uawFxZ8D0XFx7YCAwxfiOv0gYN64
14	25633452	29874598	82	-0.2059	http://genome.ucsc.edu/cgi-bin/hgTracks?db=hg19&position=chr14:25583452-29924598&hgsid=443358811_uawFxZ8D0XFx7YCAwxfiOv0gYN64
14	29993240	41073113	443	-0.0353	http://genome.ucsc.edu/cgi-bin/hgTracks?db=hg19&position=chr14:29943240-41123113&hgsid=443358811_uawFxZ8D0XFx7YCAwxfiOv0gYN64
14	41109626	44580401	60	-0.2772	http://genome.ucsc.edu/cgi-bin/hgTracks?db=hg19&position=chr14:41059626-44630401&hgsid=443358811_uawFxZ8D0XFx7YCAwxfiOv0gYN64
14	44625462	46864659	46	-0.013	http://genome.ucsc.edu/cgi-bin/hgTracks?db=hg19&position=chr14:44575462-46914659&hgsid=443358811_uawFxZ8D0XFx7YCAwxfiOv0gYN64
14	46934239	50063932	69	-0.2152	http://genome.ucsc.edu/cgi-bin/hgTracks?db=hg19&position=chr14:46884239-50113932&hgsid=443358811_uawFxZ8D0XFx7YCAwxfiOv0gYN64
14	50064374	81958373	1365	-0.0533	http://genome.ucsc.edu/cgi-bin/hgTracks?db=hg19&position=chr14:50014374-82008373&hgsid=443358811_uawFxZ8D0XFx7YCAwxfiOv0gYN64
14	82038605	88800181	129	-0.1916	http://genome.ucsc.edu/cgi-bin/hgTracks?db=hg19&position=chr14:81988605-88850181&hgsid=443358811_uawFxZ8D0XFx7YCAwxfiOv0gYN64
14	88866029	93749434	280	-0.05	http://genome.ucsc.edu/cgi-bin/hgTracks?db=hg19&position=chr14:88816029-93799434&hgsid=443358811_uawFxZ8D0XFx7YCAwxfiOv0gYN64
14	93785282	96154342	78	-0.1913	http://genome.ucsc.edu/cgi-bin/hgTracks?db=hg19&position=chr14:93735282-96204342&hgsid=443358811_uawFxZ8D0XFx7YCAwxfiOv0gYN64
14	96200382	100115847	100	-0.0238	http://genome.ucsc.edu/cgi-bin/hgTracks?db=hg19&position=chr14:96150382-100165847&hgsid=443358811_uawFxZ8D0XFx7YCAwxfiOv0gYN64
14	100121677	100512722	24	-0.2458	http://genome.ucsc.edu/cgi-bin/hgTracks?db=hg19&position=chr14:100071677-100562722&hgsid=443358811_uawFxZ8D0XFx7YCAwxfiOv0gYN64
14	100528336	107268113	444	-0.0387	http://genome.ucsc.edu/cgi-bin/hgTracks?db=hg19&position=chr14:100478336-107318113&hgsid=443358811_uawFxZ8D0XFx7YCAwxfiOv0gYN64
15	20065002	23699125	94	-0.0544	http://genome.ucsc.edu/cgi-bin/hgTracks?db=hg19&position=chr15:20015002-23749125&hgsid=443358811_uawFxZ8D0XFx7YCAwxfiOv0gYN64
15	23707030	30779267	246	-0.158	http://genome.ucsc.edu/cgi-bin/hgTracks?db=hg19&position=chr15:23657030-30829267&hgsid=443358811_uawFxZ8D0XFx7YCAwxfiOv0gYN64
15	30938893	102359691	3248	-0.0504	http://genome.ucsc.edu/cgi-bin/hgTracks?db=hg19&position=chr15:30888893-102409691&hgsid=443358811_uawFxZ8D0XFx7YCAwxfiOv0gYN64
16	89487	6051970	833	-0.0448	http://genome.ucsc.edu/cgi-bin/hgTracks?db=hg19&position=chr16:39487-6101970&hgsid=443358811_uawFxZ8D0XFx7YCAwxfiOv0gYN64
16	6074496	8330941	141	-0.1657	http://genome.ucsc.edu/cgi-bin/hgTracks?db=hg19&position=chr16:6024496-8380941&hgsid=443358811_uawFxZ8D0XFx7YCAwxfiOv0gYN64
16	8371290	35081384	1943	-0.067	http://genome.ucsc.edu/cgi-bin/hgTracks?db=hg19&position=chr16:8321290-35131384&hgsid=443358811_uawFxZ8D0XFx7YCAwxfiOv0gYN64
16	46510261	90148140	2699	-0.0708	http://genome.ucsc.edu/cgi-bin/hgTracks?db=hg19&position=chr16:46460261-90198140&hgsid=443358811_uawFxZ8D0XFx7YCAwxfiOv0gYN64
17	15018	22139608	1643	-0.0619	http://genome.ucsc.edu/cgi-bin/hgTracks?db=hg19&position=chr17:-34982-22189608&hgsid=443358811_uawFxZ8D0XFx7YCAwxfiOv0gYN64
17	25290969	81098626	3638	-0.0506	http://genome.ucsc.edu/cgi-bin/hgTracks?db=hg19&position=chr17:25240969-81148626&hgsid=443358811_uawFxZ8D0XFx7YCAwxfiOv0gYN64
18	69211	15355951	603	-0.0663	http://genome.ucsc.edu/cgi-bin/hgTracks?db=hg19&position=chr18:19211-15405951&hgsid=443358811_uawFxZ8D0XFx7YCAwxfiOv0gYN64
18	18548269	78014083	1523	-0.0746	http://genome.ucsc.edu/cgi-bin/hgTracks?db=hg19&position=chr18:18498269-78064083&hgsid=443358811_uawFxZ8D0XFx7YCAwxfiOv0gYN64
19	260372	24361551	3527	-0.0628	http://genome.ucsc.edu/cgi-bin/hgTracks?db=hg19&position=chr19:210372-24411551&hgsid=443358811_uawFxZ8D0XFx7YCAwxfiOv0gYN64
19	28282524	30709661	95	-0.1199	http://genome.ucsc.edu/cgi-bin/hgTracks?db=hg19&position=chr19:28232524-30759661&hgsid=443358811_uawFxZ8D0XFx7YCAwxfiOv0gYN64
19	30781172	32618202	43	-0.2772	http://genome.ucsc.edu/cgi-bin/hgTracks?db=hg19&position=chr19:30731172-32668202&hgsid=443358811_uawFxZ8D0XFx7YCAwxfiOv0gYN64
19	32641937	59088329	3193	-0.0611	http://genome.ucsc.edu/cgi-bin/hgTracks?db=hg19&position=chr19:32591937-59138329&hgsid=443358811_uawFxZ8D0XFx7YCAwxfiOv0gYN64
20	134165	26248042	1011	-0.0764	http://genome.ucsc.edu/cgi-bin/hgTracks?db=hg19&position=chr20:84165-26298042&hgsid=443358811_uawFxZ8D0XFx7YCAwxfiOv0gYN64
20	29583855	62892786	2224	-0.0596	http://genome.ucsc.edu/cgi-bin/hgTracks?db=hg19&position=chr20:29533855-62942786&hgsid=443358811_uawFxZ8D0XFx7YCAwxfiOv0gYN64
21	9421431	11186622	44	-0.088	http://genome.ucsc.edu/cgi-bin/hgTracks?db=hg19&position=chr21:9371431-11236622&hgsid=443358811_uawFxZ8D0XFx7YCAwxfiOv0gYN64
21	14372868	19256554	113	-0.0473	http://genome.ucsc.edu/cgi-bin/hgTracks?db=hg19&position=chr21:14322868-19306554&hgsid=443358811_uawFxZ8D0XFx7YCAwxfiOv0gYN64
21	19263403	32962033	439	-0.1405	http://genome.ucsc.edu/cgi-bin/hgTracks?db=hg19&position=chr21:19213403-33012033&hgsid=443358811_uawFxZ8D0XFx7YCAwxfiOv0gYN64
21	32979922	40889691	406	-0.0434	http://genome.ucsc.edu/cgi-bin/hgTracks?db=hg19&position=chr21:32929922-40939691&hgsid=443358811_uawFxZ8D0XFx7YCAwxfiOv0gYN64
21	40902742	42568882	40	-0.2402	http://genome.ucsc.edu/cgi-bin/hgTracks?db=hg19&position=chr21:40852742-42618882&hgsid=443358811_uawFxZ8D0XFx7YCAwxfiOv0gYN64
21	42593471	48064866	334	-0.0437	http://genome.ucsc.edu/cgi-bin/hgTracks?db=hg19&position=chr21:42543471-48114866&hgsid=443358811_uawFxZ8D0XFx7YCAwxfiOv0gYN64
22	16926329	51146491	2434	-0.0517	http://genome.ucsc.edu/cgi-bin/hgTracks?db=hg19&position=chr22:16876329-51196491&hgsid=443358811_uawFxZ8D0XFx7YCAwxfiOv0gYN64
23	150326	3737431	397	-0.0863	http://genome.ucsc.edu/cgi-bin/hgTracks?db=hg19&position=chr23:100326-3787431&hgsid=443358811_uawFxZ8D0XFx7YCAwxfiOv0gYN64
23	3951933	6631958	80	-0.2294	http://genome.ucsc.edu/cgi-bin/hgTracks?db=hg19&position=chr23:3901933-6681958&hgsid=443358811_uawFxZ8D0XFx7YCAwxfiOv0gYN64
23	6659888	58003859	1248	-0.0824	http://genome.ucsc.edu/cgi-bin/hgTracks?db=hg19&position=chr23:6609888-58053859&hgsid=443358811_uawFxZ8D0XFx7YCAwxfiOv0gYN64
23	62253658	155221007	1500	-0.099	http://genome.ucsc.edu/cgi-bin/hgTracks?db=hg19&position=chr23:62203658-155271007&hgsid=443358811_uawFxZ8D0XFx7YCAwxfiOv0gYN64
24	7414009	10022029	2	0.02	http://genome.ucsc.edu/cgi-bin/hgTracks?db=hg19&position=chr24:7364009-10072029&hgsid=443358811_uawFxZ8D0XFx7YCAwxfiOv0gYN64
24	25207542	59026041	3	-0.1167	http://genome.ucsc.edu/cgi-bin/hgTracks?db=hg19&position=chr24:25157542-59076041&hgsid=443358811_uawFxZ8D0XFx7YCAwxfiOv0gYN64

## Sheet: cancer3
chr	loc.start	loc.end	num.mark	seg.mean
1	705685	71970961	4194	-0.0529	http://genome.ucsc.edu/cgi-bin/hgTracks?db=hg19&position=chr1:655685-72020961&hgsid=443358811_uawFxZ8D0XFx7YCAwxfiOv0gYN64
1	72063318	76984472	72	-0.2467	http://genome.ucsc.edu/cgi-bin/hgTracks?db=hg19&position=chr1:72013318-77034472&hgsid=443358811_uawFxZ8D0XFx7YCAwxfiOv0gYN64
1	77016430	79865070	92	-0.0478	http://genome.ucsc.edu/cgi-bin/hgTracks?db=hg19&position=chr1:76966430-79915070&hgsid=443358811_uawFxZ8D0XFx7YCAwxfiOv0gYN64
1	79939270	84402889	79	-0.3124	http://genome.ucsc.edu/cgi-bin/hgTracks?db=hg19&position=chr1:79889270-84452889&hgsid=443358811_uawFxZ8D0XFx7YCAwxfiOv0gYN64
1	84449493	101570540	530	-0.0814	http://genome.ucsc.edu/cgi-bin/hgTracks?db=hg19&position=chr1:84399493-101620540&hgsid=443358811_uawFxZ8D0XFx7YCAwxfiOv0gYN64
1	101642090	109246167	148	-0.2291	http://genome.ucsc.edu/cgi-bin/hgTracks?db=hg19&position=chr1:101592090-109296167&hgsid=443358811_uawFxZ8D0XFx7YCAwxfiOv0gYN64
1	109282941	121159262	388	-0.0496	http://genome.ucsc.edu/cgi-bin/hgTracks?db=hg19&position=chr1:109232941-121209262&hgsid=443358811_uawFxZ8D0XFx7YCAwxfiOv0gYN64
1	142646941	186390716	1759	-0.0537	http://genome.ucsc.edu/cgi-bin/hgTracks?db=hg19&position=chr1:142596941-186440716&hgsid=443358811_uawFxZ8D0XFx7YCAwxfiOv0gYN64
1	186402704	193030833	184	-0.2671	http://genome.ucsc.edu/cgi-bin/hgTracks?db=hg19&position=chr1:186352704-193080833&hgsid=443358811_uawFxZ8D0XFx7YCAwxfiOv0gYN64
1	193058933	193830772	24	0.045	http://genome.ucsc.edu/cgi-bin/hgTracks?db=hg19&position=chr1:193008933-193880772&hgsid=443358811_uawFxZ8D0XFx7YCAwxfiOv0gYN64
1	193917466	195314379	36	-0.3394	http://genome.ucsc.edu/cgi-bin/hgTracks?db=hg19&position=chr1:193867466-195364379&hgsid=443358811_uawFxZ8D0XFx7YCAwxfiOv0gYN64
1	195327664	199707828	100	-0.1627	http://genome.ucsc.edu/cgi-bin/hgTracks?db=hg19&position=chr1:195277664-199757828&hgsid=443358811_uawFxZ8D0XFx7YCAwxfiOv0gYN64
1	199720484	199936936	13	-0.3885	http://genome.ucsc.edu/cgi-bin/hgTracks?db=hg19&position=chr1:199670484-199986936&hgsid=443358811_uawFxZ8D0XFx7YCAwxfiOv0gYN64
1	199937608	249177775	2199	-0.0748	http://genome.ucsc.edu/cgi-bin/hgTracks?db=hg19&position=chr1:199887608-249227775&hgsid=443358811_uawFxZ8D0XFx7YCAwxfiOv0gYN64
2	13950	8105650	160	-0.2287	http://genome.ucsc.edu/cgi-bin/hgTracks?db=hg19&position=chr2:-36050-8155650&hgsid=443358811_uawFxZ8D0XFx7YCAwxfiOv0gYN64
2	8123919	10949521	194	-0.0065	http://genome.ucsc.edu/cgi-bin/hgTracks?db=hg19&position=chr2:8073919-10999521&hgsid=443358811_uawFxZ8D0XFx7YCAwxfiOv0gYN64
2	10952045	23654482	336	-0.1575	http://genome.ucsc.edu/cgi-bin/hgTracks?db=hg19&position=chr2:10902045-23704482&hgsid=443358811_uawFxZ8D0XFx7YCAwxfiOv0gYN64
2	23698789	33660371	704	-0.0443	http://genome.ucsc.edu/cgi-bin/hgTracks?db=hg19&position=chr2:23648789-33710371&hgsid=443358811_uawFxZ8D0XFx7YCAwxfiOv0gYN64
2	33665958	35701798	64	-0.1947	http://genome.ucsc.edu/cgi-bin/hgTracks?db=hg19&position=chr2:33615958-35751798&hgsid=443358811_uawFxZ8D0XFx7YCAwxfiOv0gYN64
2	35711264	40975446	243	-0.0561	http://genome.ucsc.edu/cgi-bin/hgTracks?db=hg19&position=chr2:35661264-41025446&hgsid=443358811_uawFxZ8D0XFx7YCAwxfiOv0gYN64
2	41033221	42279607	23	-0.3561	http://genome.ucsc.edu/cgi-bin/hgTracks?db=hg19&position=chr2:40983221-42329607&hgsid=443358811_uawFxZ8D0XFx7YCAwxfiOv0gYN64
2	42315327	75102450	1466	-0.0815	http://genome.ucsc.edu/cgi-bin/hgTracks?db=hg19&position=chr2:42265327-75152450&hgsid=443358811_uawFxZ8D0XFx7YCAwxfiOv0gYN64
2	75146733	84627955	198	-0.2369	http://genome.ucsc.edu/cgi-bin/hgTracks?db=hg19&position=chr2:75096733-84677955&hgsid=443358811_uawFxZ8D0XFx7YCAwxfiOv0gYN64
2	84650232	92199980	244	-0.1013	http://genome.ucsc.edu/cgi-bin/hgTracks?db=hg19&position=chr2:84600232-92249980&hgsid=443358811_uawFxZ8D0XFx7YCAwxfiOv0gYN64
2	95528604	100146821	196	-0.0594	http://genome.ucsc.edu/cgi-bin/hgTracks?db=hg19&position=chr2:95478604-100196821&hgsid=443358811_uawFxZ8D0XFx7YCAwxfiOv0gYN64
2	100147393	100998339	36	-0.3136	http://genome.ucsc.edu/cgi-bin/hgTracks?db=hg19&position=chr2:100097393-101048339&hgsid=443358811_uawFxZ8D0XFx7YCAwxfiOv0gYN64
2	101002353	103398483	111	-0.0403	http://genome.ucsc.edu/cgi-bin/hgTracks?db=hg19&position=chr2:100952353-103448483&hgsid=443358811_uawFxZ8D0XFx7YCAwxfiOv0gYN64
2	103588939	105285958	41	-0.3695	http://genome.ucsc.edu/cgi-bin/hgTracks?db=hg19&position=chr2:103538939-105335958&hgsid=443358811_uawFxZ8D0XFx7YCAwxfiOv0gYN64
2	105301732	115816006	331	-0.0725	http://genome.ucsc.edu/cgi-bin/hgTracks?db=hg19&position=chr2:105251732-115866006&hgsid=443358811_uawFxZ8D0XFx7YCAwxfiOv0gYN64
2	115817890	120038225	75	-0.2492	http://genome.ucsc.edu/cgi-bin/hgTracks?db=hg19&position=chr2:115767890-120088225&hgsid=443358811_uawFxZ8D0XFx7YCAwxfiOv0gYN64
2	120046982	122762360	159	-0.0684	http://genome.ucsc.edu/cgi-bin/hgTracks?db=hg19&position=chr2:119996982-122812360&hgsid=443358811_uawFxZ8D0XFx7YCAwxfiOv0gYN64
2	122762979	125534964	62	-0.2968	http://genome.ucsc.edu/cgi-bin/hgTracks?db=hg19&position=chr2:122712979-125584964&hgsid=443358811_uawFxZ8D0XFx7YCAwxfiOv0gYN64
2	125543532	129190765	179	-0.0732	http://genome.ucsc.edu/cgi-bin/hgTracks?db=hg19&position=chr2:125493532-129240765&hgsid=443358811_uawFxZ8D0XFx7YCAwxfiOv0gYN64
2	129217038	130563252	25	-0.3312	http://genome.ucsc.edu/cgi-bin/hgTracks?db=hg19&position=chr2:129167038-130613252&hgsid=443358811_uawFxZ8D0XFx7YCAwxfiOv0gYN64
2	130566139	132244213	64	-0.0706	http://genome.ucsc.edu/cgi-bin/hgTracks?db=hg19&position=chr2:130516139-132294213&hgsid=443358811_uawFxZ8D0XFx7YCAwxfiOv0gYN64
2	132249022	135525127	82	-0.1954	http://genome.ucsc.edu/cgi-bin/hgTracks?db=hg19&position=chr2:132199022-135575127&hgsid=443358811_uawFxZ8D0XFx7YCAwxfiOv0gYN64
2	135544949	136888894	102	-0.0125	http://genome.ucsc.edu/cgi-bin/hgTracks?db=hg19&position=chr2:135494949-136938894&hgsid=443358811_uawFxZ8D0XFx7YCAwxfiOv0gYN64
2	136892419	147679940	187	-0.2231	http://genome.ucsc.edu/cgi-bin/hgTracks?db=hg19&position=chr2:136842419-147729940&hgsid=443358811_uawFxZ8D0XFx7YCAwxfiOv0gYN64
2	147694713	153677969	187	-0.0337	http://genome.ucsc.edu/cgi-bin/hgTracks?db=hg19&position=chr2:147644713-153727969&hgsid=443358811_uawFxZ8D0XFx7YCAwxfiOv0gYN64
2	153689465	156431950	44	-0.3409	http://genome.ucsc.edu/cgi-bin/hgTracks?db=hg19&position=chr2:153639465-156481950&hgsid=443358811_uawFxZ8D0XFx7YCAwxfiOv0gYN64
2	156463519	162401420	197	-0.0636	http://genome.ucsc.edu/cgi-bin/hgTracks?db=hg19&position=chr2:156413519-162451420&hgsid=443358811_uawFxZ8D0XFx7YCAwxfiOv0gYN64
2	162402450	168077701	114	-0.2439	http://genome.ucsc.edu/cgi-bin/hgTracks?db=hg19&position=chr2:162352450-168127701&hgsid=443358811_uawFxZ8D0XFx7YCAwxfiOv0gYN64
2	168185314	208908602	1449	-0.0885	http://genome.ucsc.edu/cgi-bin/hgTracks?db=hg19&position=chr2:168135314-208958602&hgsid=443358811_uawFxZ8D0XFx7YCAwxfiOv0gYN64
2	208925348	216634981	195	-0.1922	http://genome.ucsc.edu/cgi-bin/hgTracks?db=hg19&position=chr2:208875348-216684981&hgsid=443358811_uawFxZ8D0XFx7YCAwxfiOv0gYN64
2	216694352	228723307	466	-0.1051	http://genome.ucsc.edu/cgi-bin/hgTracks?db=hg19&position=chr2:216644352-228773307&hgsid=443358811_uawFxZ8D0XFx7YCAwxfiOv0gYN64
2	228758836	230591828	31	-0.2797	http://genome.ucsc.edu/cgi-bin/hgTracks?db=hg19&position=chr2:228708836-230641828&hgsid=443358811_uawFxZ8D0XFx7YCAwxfiOv0gYN64
2	230627273	237041623	463	-0.0428	http://genome.ucsc.edu/cgi-bin/hgTracks?db=hg19&position=chr2:230577273-237091623&hgsid=443358811_uawFxZ8D0XFx7YCAwxfiOv0gYN64
2	237044221	238868247	64	-0.192	http://genome.ucsc.edu/cgi-bin/hgTracks?db=hg19&position=chr2:236994221-238918247&hgsid=443358811_uawFxZ8D0XFx7YCAwxfiOv0gYN64
2	238874512	243016749	169	-0.0447	http://genome.ucsc.edu/cgi-bin/hgTracks?db=hg19&position=chr2:238824512-243066749&hgsid=443358811_uawFxZ8D0XFx7YCAwxfiOv0gYN64
3	129284	3829671	100	-0.2286	http://genome.ucsc.edu/cgi-bin/hgTracks?db=hg19&position=chr3:79284-3879671&hgsid=443358811_uawFxZ8D0XFx7YCAwxfiOv0gYN64
3	4153122	6626970	101	-0.0767	http://genome.ucsc.edu/cgi-bin/hgTracks?db=hg19&position=chr3:4103122-6676970&hgsid=443358811_uawFxZ8D0XFx7YCAwxfiOv0gYN64
3	6817251	8595726	33	-0.2739	http://genome.ucsc.edu/cgi-bin/hgTracks?db=hg19&position=chr3:6767251-8645726&hgsid=443358811_uawFxZ8D0XFx7YCAwxfiOv0gYN64
3	8639625	19223739	471	-0.0383	http://genome.ucsc.edu/cgi-bin/hgTracks?db=hg19&position=chr3:8589625-19273739&hgsid=443358811_uawFxZ8D0XFx7YCAwxfiOv0gYN64
3	19340843	30053322	310	-0.1618	http://genome.ucsc.edu/cgi-bin/hgTracks?db=hg19&position=chr3:19290843-30103322&hgsid=443358811_uawFxZ8D0XFx7YCAwxfiOv0gYN64
3	30103373	47605046	708	-0.0566	http://genome.ucsc.edu/cgi-bin/hgTracks?db=hg19&position=chr3:30053373-47655046&hgsid=443358811_uawFxZ8D0XFx7YCAwxfiOv0gYN64
3	47612005	47622336	2	-0.75	http://genome.ucsc.edu/cgi-bin/hgTracks?db=hg19&position=chr3:47562005-47672336&hgsid=443358811_uawFxZ8D0XFx7YCAwxfiOv0gYN64
3	47634683	55054595	575	-0.015	http://genome.ucsc.edu/cgi-bin/hgTracks?db=hg19&position=chr3:47584683-55104595&hgsid=443358811_uawFxZ8D0XFx7YCAwxfiOv0gYN64
3	55059377	56589448	44	-0.2539	http://genome.ucsc.edu/cgi-bin/hgTracks?db=hg19&position=chr3:55009377-56639448&hgsid=443358811_uawFxZ8D0XFx7YCAwxfiOv0gYN64
3	56596059	67950064	446	-0.0341	http://genome.ucsc.edu/cgi-bin/hgTracks?db=hg19&position=chr3:56546059-68000064&hgsid=443358811_uawFxZ8D0XFx7YCAwxfiOv0gYN64
3	68030680	68967694	13	-0.3831	http://genome.ucsc.edu/cgi-bin/hgTracks?db=hg19&position=chr3:67980680-69017694&hgsid=443358811_uawFxZ8D0XFx7YCAwxfiOv0gYN64
3	68992290	71822120	135	-0.0688	http://genome.ucsc.edu/cgi-bin/hgTracks?db=hg19&position=chr3:68942290-71872120&hgsid=443358811_uawFxZ8D0XFx7YCAwxfiOv0gYN64
3	71853150	72133827	12	-0.415	http://genome.ucsc.edu/cgi-bin/hgTracks?db=hg19&position=chr3:71803150-72183827&hgsid=443358811_uawFxZ8D0XFx7YCAwxfiOv0gYN64
3	72152696	73350359	96	-0.073	http://genome.ucsc.edu/cgi-bin/hgTracks?db=hg19&position=chr3:72102696-73400359&hgsid=443358811_uawFxZ8D0XFx7YCAwxfiOv0gYN64
3	73356601	90352947	388	-0.2023	http://genome.ucsc.edu/cgi-bin/hgTracks?db=hg19&position=chr3:73306601-90402947&hgsid=443358811_uawFxZ8D0XFx7YCAwxfiOv0gYN64
3	93529821	142561298	1507	-0.0904	http://genome.ucsc.edu/cgi-bin/hgTracks?db=hg19&position=chr3:93479821-142611298&hgsid=443358811_uawFxZ8D0XFx7YCAwxfiOv0gYN64
3	142600892	148057699	113	-0.2365	http://genome.ucsc.edu/cgi-bin/hgTracks?db=hg19&position=chr3:142550892-148107699&hgsid=443358811_uawFxZ8D0XFx7YCAwxfiOv0gYN64
3	148073906	163684599	433	-0.1004	http://genome.ucsc.edu/cgi-bin/hgTracks?db=hg19&position=chr3:148023906-163734599&hgsid=443358811_uawFxZ8D0XFx7YCAwxfiOv0gYN64
3	163691264	167331903	77	-0.2865	http://genome.ucsc.edu/cgi-bin/hgTracks?db=hg19&position=chr3:163641264-167381903&hgsid=443358811_uawFxZ8D0XFx7YCAwxfiOv0gYN64
3	167422019	172751513	191	-0.0401	http://genome.ucsc.edu/cgi-bin/hgTracks?db=hg19&position=chr3:167372019-172801513&hgsid=443358811_uawFxZ8D0XFx7YCAwxfiOv0gYN64
3	172769604	173799388	27	-0.3641	http://genome.ucsc.edu/cgi-bin/hgTracks?db=hg19&position=chr3:172719604-173849388&hgsid=443358811_uawFxZ8D0XFx7YCAwxfiOv0gYN64
3	173856221	192018527	797	-0.0709	http://genome.ucsc.edu/cgi-bin/hgTracks?db=hg19&position=chr3:173806221-192068527&hgsid=443358811_uawFxZ8D0XFx7YCAwxfiOv0gYN64
3	192099784	192224146	6	-0.64	http://genome.ucsc.edu/cgi-bin/hgTracks?db=hg19&position=chr3:192049784-192274146&hgsid=443358811_uawFxZ8D0XFx7YCAwxfiOv0gYN64
3	192239741	197839077	485	-0.0416	http://genome.ucsc.edu/cgi-bin/hgTracks?db=hg19&position=chr3:192189741-197889077&hgsid=443358811_uawFxZ8D0XFx7YCAwxfiOv0gYN64
4	35032	5291315	327	-0.0656	http://genome.ucsc.edu/cgi-bin/hgTracks?db=hg19&position=chr4:-14968-5341315&hgsid=443358811_uawFxZ8D0XFx7YCAwxfiOv0gYN64
4	5330653	6260949	27	-0.3107	http://genome.ucsc.edu/cgi-bin/hgTracks?db=hg19&position=chr4:5280653-6310949&hgsid=443358811_uawFxZ8D0XFx7YCAwxfiOv0gYN64
4	6298553	7067584	62	-0.0202	http://genome.ucsc.edu/cgi-bin/hgTracks?db=hg19&position=chr4:6248553-7117584&hgsid=443358811_uawFxZ8D0XFx7YCAwxfiOv0gYN64
4	7071664	7126198	4	-0.6525	http://genome.ucsc.edu/cgi-bin/hgTracks?db=hg19&position=chr4:7021664-7176198&hgsid=443358811_uawFxZ8D0XFx7YCAwxfiOv0gYN64
4	7127408	11781162	113	-0.0158	http://genome.ucsc.edu/cgi-bin/hgTracks?db=hg19&position=chr4:7077408-11831162&hgsid=443358811_uawFxZ8D0XFx7YCAwxfiOv0gYN64
4	11788387	25691385	349	-0.1549	http://genome.ucsc.edu/cgi-bin/hgTracks?db=hg19&position=chr4:11738387-25741385&hgsid=443358811_uawFxZ8D0XFx7YCAwxfiOv0gYN64
4	25696929	27030610	65	-0.0698	http://genome.ucsc.edu/cgi-bin/hgTracks?db=hg19&position=chr4:25646929-27080610&hgsid=443358811_uawFxZ8D0XFx7YCAwxfiOv0gYN64
4	27033675	36052842	225	-0.2495	http://genome.ucsc.edu/cgi-bin/hgTracks?db=hg19&position=chr4:26983675-36102842&hgsid=443358811_uawFxZ8D0XFx7YCAwxfiOv0gYN64
4	36054305	41196418	350	-0.0425	http://genome.ucsc.edu/cgi-bin/hgTracks?db=hg19&position=chr4:36004305-41246418&hgsid=443358811_uawFxZ8D0XFx7YCAwxfiOv0gYN64
4	41213474	47791756	160	-0.1939	http://genome.ucsc.edu/cgi-bin/hgTracks?db=hg19&position=chr4:41163474-47841756&hgsid=443358811_uawFxZ8D0XFx7YCAwxfiOv0gYN64
4	47867726	49160453	53	-0.0123	http://genome.ucsc.edu/cgi-bin/hgTracks?db=hg19&position=chr4:47817726-49210453&hgsid=443358811_uawFxZ8D0XFx7YCAwxfiOv0gYN64
4	52713789	57914225	193	-0.0886	http://genome.ucsc.edu/cgi-bin/hgTracks?db=hg19&position=chr4:52663789-57964225&hgsid=443358811_uawFxZ8D0XFx7YCAwxfiOv0gYN64
4	57930224	68062273	206	-0.2605	http://genome.ucsc.edu/cgi-bin/hgTracks?db=hg19&position=chr4:57880224-68112273&hgsid=443358811_uawFxZ8D0XFx7YCAwxfiOv0gYN64
4	68269757	86395271	485	-0.0825	http://genome.ucsc.edu/cgi-bin/hgTracks?db=hg19&position=chr4:68219757-86445271&hgsid=443358811_uawFxZ8D0XFx7YCAwxfiOv0gYN64
4	86415602	87446171	27	-0.3289	http://genome.ucsc.edu/cgi-bin/hgTracks?db=hg19&position=chr4:86365602-87496171&hgsid=443358811_uawFxZ8D0XFx7YCAwxfiOv0gYN64
4	87461367	92273417	152	-0.0659	http://genome.ucsc.edu/cgi-bin/hgTracks?db=hg19&position=chr4:87411367-92323417&hgsid=443358811_uawFxZ8D0XFx7YCAwxfiOv0gYN64
4	92717812	99162222	122	-0.2341	http://genome.ucsc.edu/cgi-bin/hgTracks?db=hg19&position=chr4:92667812-99212222&hgsid=443358811_uawFxZ8D0XFx7YCAwxfiOv0gYN64
4	99199104	130603347	703	-0.0895	http://genome.ucsc.edu/cgi-bin/hgTracks?db=hg19&position=chr4:99149104-130653347&hgsid=443358811_uawFxZ8D0XFx7YCAwxfiOv0gYN64
4	130606924	138697377	169	-0.2483	http://genome.ucsc.edu/cgi-bin/hgTracks?db=hg19&position=chr4:130556924-138747377&hgsid=443358811_uawFxZ8D0XFx7YCAwxfiOv0gYN64
4	138728481	154557996	439	-0.0381	http://genome.ucsc.edu/cgi-bin/hgTracks?db=hg19&position=chr4:138678481-154607996&hgsid=443358811_uawFxZ8D0XFx7YCAwxfiOv0gYN64
4	154592268	158871367	76	-0.2482	http://genome.ucsc.edu/cgi-bin/hgTracks?db=hg19&position=chr4:154542268-158921367&hgsid=443358811_uawFxZ8D0XFx7YCAwxfiOv0gYN64
4	158931571	161853843	85	-0.0529	http://genome.ucsc.edu/cgi-bin/hgTracks?db=hg19&position=chr4:158881571-161903843&hgsid=443358811_uawFxZ8D0XFx7YCAwxfiOv0gYN64
4	161944215	163219904	40	-0.2782	http://genome.ucsc.edu/cgi-bin/hgTracks?db=hg19&position=chr4:161894215-163269904&hgsid=443358811_uawFxZ8D0XFx7YCAwxfiOv0gYN64
4	163309649	166766694	98	-0.1101	http://genome.ucsc.edu/cgi-bin/hgTracks?db=hg19&position=chr4:163259649-166816694&hgsid=443358811_uawFxZ8D0XFx7YCAwxfiOv0gYN64
4	166770214	169031080	51	-0.3227	http://genome.ucsc.edu/cgi-bin/hgTracks?db=hg19&position=chr4:166720214-169081080&hgsid=443358811_uawFxZ8D0XFx7YCAwxfiOv0gYN64
4	169042983	171302330	78	-0.0304	http://genome.ucsc.edu/cgi-bin/hgTracks?db=hg19&position=chr4:168992983-171352330&hgsid=443358811_uawFxZ8D0XFx7YCAwxfiOv0gYN64
4	171397036	182966920	282	-0.2429	http://genome.ucsc.edu/cgi-bin/hgTracks?db=hg19&position=chr4:171347036-183016920&hgsid=443358811_uawFxZ8D0XFx7YCAwxfiOv0gYN64
4	183001863	191033113	382	-0.1019	http://genome.ucsc.edu/cgi-bin/hgTracks?db=hg19&position=chr4:182951863-191083113&hgsid=443358811_uawFxZ8D0XFx7YCAwxfiOv0gYN64
5	13855	32066168	886	-0.1733	http://genome.ucsc.edu/cgi-bin/hgTracks?db=hg19&position=chr5:-36145-32116168&hgsid=443358811_uawFxZ8D0XFx7YCAwxfiOv0gYN64
5	32070821	46104940	495	-0.073	http://genome.ucsc.edu/cgi-bin/hgTracks?db=hg19&position=chr5:32020821-46154940&hgsid=443358811_uawFxZ8D0XFx7YCAwxfiOv0gYN64
5	49443126	50318034	15	-0.028	http://genome.ucsc.edu/cgi-bin/hgTracks?db=hg19&position=chr5:49393126-50368034&hgsid=443358811_uawFxZ8D0XFx7YCAwxfiOv0gYN64
5	50400795	51416293	26	-0.3288	http://genome.ucsc.edu/cgi-bin/hgTracks?db=hg19&position=chr5:50350795-51466293&hgsid=443358811_uawFxZ8D0XFx7YCAwxfiOv0gYN64
5	51498014	62024473	320	-0.07	http://genome.ucsc.edu/cgi-bin/hgTracks?db=hg19&position=chr5:51448014-62074473&hgsid=443358811_uawFxZ8D0XFx7YCAwxfiOv0gYN64
5	62107624	62361770	4	-0.615	http://genome.ucsc.edu/cgi-bin/hgTracks?db=hg19&position=chr5:62057624-62411770&hgsid=443358811_uawFxZ8D0XFx7YCAwxfiOv0gYN64
5	62402066	160345951	2993	-0.0811	http://genome.ucsc.edu/cgi-bin/hgTracks?db=hg19&position=chr5:62352066-160395951&hgsid=443358811_uawFxZ8D0XFx7YCAwxfiOv0gYN64
5	160408797	162013687	32	-0.4128	http://genome.ucsc.edu/cgi-bin/hgTracks?db=hg19&position=chr5:160358797-162063687&hgsid=443358811_uawFxZ8D0XFx7YCAwxfiOv0gYN64
5	162112310	167471143	169	-0.1914	http://genome.ucsc.edu/cgi-bin/hgTracks?db=hg19&position=chr5:162062310-167521143&hgsid=443358811_uawFxZ8D0XFx7YCAwxfiOv0gYN64
5	167595405	180698548	812	-0.0793	http://genome.ucsc.edu/cgi-bin/hgTracks?db=hg19&position=chr5:167545405-180748548&hgsid=443358811_uawFxZ8D0XFx7YCAwxfiOv0gYN64
6	238812	8999312	359	-0.0667	http://genome.ucsc.edu/cgi-bin/hgTracks?db=hg19&position=chr6:188812-9049312&hgsid=443358811_uawFxZ8D0XFx7YCAwxfiOv0gYN64
6	9020541	10662718	62	-0.2637	http://genome.ucsc.edu/cgi-bin/hgTracks?db=hg19&position=chr6:8970541-10712718&hgsid=443358811_uawFxZ8D0XFx7YCAwxfiOv0gYN64
6	10692687	38669705	1957	-0.0638	http://genome.ucsc.edu/cgi-bin/hgTracks?db=hg19&position=chr6:10642687-38719705&hgsid=443358811_uawFxZ8D0XFx7YCAwxfiOv0gYN64
6	38671467	38908612	12	-0.4733	http://genome.ucsc.edu/cgi-bin/hgTracks?db=hg19&position=chr6:38621467-38958612&hgsid=443358811_uawFxZ8D0XFx7YCAwxfiOv0gYN64
6	38915524	58706852	637	-0.071	http://genome.ucsc.edu/cgi-bin/hgTracks?db=hg19&position=chr6:38865524-58756852&hgsid=443358811_uawFxZ8D0XFx7YCAwxfiOv0gYN64
6	61978733	64985341	74	-0.1268	http://genome.ucsc.edu/cgi-bin/hgTracks?db=hg19&position=chr6:61928733-65035341&hgsid=443358811_uawFxZ8D0XFx7YCAwxfiOv0gYN64
6	65090629	70249986	101	-0.2845	http://genome.ucsc.edu/cgi-bin/hgTracks?db=hg19&position=chr6:65040629-70299986&hgsid=443358811_uawFxZ8D0XFx7YCAwxfiOv0gYN64
6	70335735	90610505	628	-0.1107	http://genome.ucsc.edu/cgi-bin/hgTracks?db=hg19&position=chr6:70285735-90660505&hgsid=443358811_uawFxZ8D0XFx7YCAwxfiOv0gYN64
6	90631692	99457148	166	-0.2372	http://genome.ucsc.edu/cgi-bin/hgTracks?db=hg19&position=chr6:90581692-99507148&hgsid=443358811_uawFxZ8D0XFx7YCAwxfiOv0gYN64
6	99575992	101311494	56	-0.0723	http://genome.ucsc.edu/cgi-bin/hgTracks?db=hg19&position=chr6:99525992-101361494&hgsid=443358811_uawFxZ8D0XFx7YCAwxfiOv0gYN64
6	101372483	105719295	103	-0.2461	http://genome.ucsc.edu/cgi-bin/hgTracks?db=hg19&position=chr6:101322483-105769295&hgsid=443358811_uawFxZ8D0XFx7YCAwxfiOv0gYN64
6	105728018	114494741	440	-0.0705	http://genome.ucsc.edu/cgi-bin/hgTracks?db=hg19&position=chr6:105678018-114544741&hgsid=443358811_uawFxZ8D0XFx7YCAwxfiOv0gYN64
6	114539152	125878720	254	-0.1943	http://genome.ucsc.edu/cgi-bin/hgTracks?db=hg19&position=chr6:114489152-125928720&hgsid=443358811_uawFxZ8D0XFx7YCAwxfiOv0gYN64
6	125896913	152000486	1029	-0.0917	http://genome.ucsc.edu/cgi-bin/hgTracks?db=hg19&position=chr6:125846913-152050486&hgsid=443358811_uawFxZ8D0XFx7YCAwxfiOv0gYN64
6	152006250	154352588	63	-0.2675	http://genome.ucsc.edu/cgi-bin/hgTracks?db=hg19&position=chr6:151956250-154402588&hgsid=443358811_uawFxZ8D0XFx7YCAwxfiOv0gYN64
6	154375225	156455766	128	-0.097	http://genome.ucsc.edu/cgi-bin/hgTracks?db=hg19&position=chr6:154325225-156505766&hgsid=443358811_uawFxZ8D0XFx7YCAwxfiOv0gYN64
6	156512249	156817636	6	-0.6717	http://genome.ucsc.edu/cgi-bin/hgTracks?db=hg19&position=chr6:156462249-156867636&hgsid=443358811_uawFxZ8D0XFx7YCAwxfiOv0gYN64
6	156909031	161181871	215	-0.0423	http://genome.ucsc.edu/cgi-bin/hgTracks?db=hg19&position=chr6:156859031-161231871&hgsid=443358811_uawFxZ8D0XFx7YCAwxfiOv0gYN64
6	161246401	165692636	141	-0.2436	http://genome.ucsc.edu/cgi-bin/hgTracks?db=hg19&position=chr6:161196401-165742636&hgsid=443358811_uawFxZ8D0XFx7YCAwxfiOv0gYN64
6	165749957	170906804	140	-0.0779	http://genome.ucsc.edu/cgi-bin/hgTracks?db=hg19&position=chr6:165699957-170956804&hgsid=443358811_uawFxZ8D0XFx7YCAwxfiOv0gYN64
7	151335	1221685	130	-0.026	http://genome.ucsc.edu/cgi-bin/hgTracks?db=hg19&position=chr7:101335-1271685&hgsid=443358811_uawFxZ8D0XFx7YCAwxfiOv0gYN64
7	1224065	1464772	35	-0.3171	http://genome.ucsc.edu/cgi-bin/hgTracks?db=hg19&position=chr7:1174065-1514772&hgsid=443358811_uawFxZ8D0XFx7YCAwxfiOv0gYN64
7	1470507	1616210	21	-0.0376	http://genome.ucsc.edu/cgi-bin/hgTracks?db=hg19&position=chr7:1420507-1666210&hgsid=443358811_uawFxZ8D0XFx7YCAwxfiOv0gYN64
7	1652392	1802657	17	-0.3518	http://genome.ucsc.edu/cgi-bin/hgTracks?db=hg19&position=chr7:1602392-1852657&hgsid=443358811_uawFxZ8D0XFx7YCAwxfiOv0gYN64
7	1809725	3226296	180	-0.0779	http://genome.ucsc.edu/cgi-bin/hgTracks?db=hg19&position=chr7:1759725-3276296&hgsid=443358811_uawFxZ8D0XFx7YCAwxfiOv0gYN64
7	3227545	4607190	83	-0.3467	http://genome.ucsc.edu/cgi-bin/hgTracks?db=hg19&position=chr7:3177545-4657190&hgsid=443358811_uawFxZ8D0XFx7YCAwxfiOv0gYN64
7	4612131	8719371	447	-0.0762	http://genome.ucsc.edu/cgi-bin/hgTracks?db=hg19&position=chr7:4562131-8769371&hgsid=443358811_uawFxZ8D0XFx7YCAwxfiOv0gYN64
7	8730768	10479802	40	-0.3905	http://genome.ucsc.edu/cgi-bin/hgTracks?db=hg19&position=chr7:8680768-10529802&hgsid=443358811_uawFxZ8D0XFx7YCAwxfiOv0gYN64
7	10607859	57857193	1633	-0.1165	http://genome.ucsc.edu/cgi-bin/hgTracks?db=hg19&position=chr7:10557859-57907193&hgsid=443358811_uawFxZ8D0XFx7YCAwxfiOv0gYN64
7	62191440	63924931	44	-0.2159	http://genome.ucsc.edu/cgi-bin/hgTracks?db=hg19&position=chr7:62141440-63974931&hgsid=443358811_uawFxZ8D0XFx7YCAwxfiOv0gYN64
7	63954854	67056656	277	-0.0603	http://genome.ucsc.edu/cgi-bin/hgTracks?db=hg19&position=chr7:63904854-67106656&hgsid=443358811_uawFxZ8D0XFx7YCAwxfiOv0gYN64
7	67092474	69582736	193	-0.3002	http://genome.ucsc.edu/cgi-bin/hgTracks?db=hg19&position=chr7:67042474-69632736&hgsid=443358811_uawFxZ8D0XFx7YCAwxfiOv0gYN64
7	69591817	70259596	42	-0.0136	http://genome.ucsc.edu/cgi-bin/hgTracks?db=hg19&position=chr7:69541817-70309596&hgsid=443358811_uawFxZ8D0XFx7YCAwxfiOv0gYN64
7	70272007	72004830	159	-0.2279	http://genome.ucsc.edu/cgi-bin/hgTracks?db=hg19&position=chr7:70222007-72054830&hgsid=443358811_uawFxZ8D0XFx7YCAwxfiOv0gYN64
7	72006282	75253103	304	-0.0138	http://genome.ucsc.edu/cgi-bin/hgTracks?db=hg19&position=chr7:71956282-75303103&hgsid=443358811_uawFxZ8D0XFx7YCAwxfiOv0gYN64
7	75288695	75491406	34	-0.22	http://genome.ucsc.edu/cgi-bin/hgTracks?db=hg19&position=chr7:75238695-75541406&hgsid=443358811_uawFxZ8D0XFx7YCAwxfiOv0gYN64
7	75497866	77674204	196	-0.0307	http://genome.ucsc.edu/cgi-bin/hgTracks?db=hg19&position=chr7:75447866-77724204&hgsid=443358811_uawFxZ8D0XFx7YCAwxfiOv0gYN64
7	77715959	89114610	311	-0.2013	http://genome.ucsc.edu/cgi-bin/hgTracks?db=hg19&position=chr7:77665959-89164610&hgsid=443358811_uawFxZ8D0XFx7YCAwxfiOv0gYN64
7	89130910	114364917	1274	-0.0886	http://genome.ucsc.edu/cgi-bin/hgTracks?db=hg19&position=chr7:89080910-114414917&hgsid=443358811_uawFxZ8D0XFx7YCAwxfiOv0gYN64
7	114367462	115793296	31	-0.3739	http://genome.ucsc.edu/cgi-bin/hgTracks?db=hg19&position=chr7:114317462-115843296&hgsid=443358811_uawFxZ8D0XFx7YCAwxfiOv0gYN64
7	116034359	118273187	68	-0.1241	http://genome.ucsc.edu/cgi-bin/hgTracks?db=hg19&position=chr7:115984359-118323187&hgsid=443358811_uawFxZ8D0XFx7YCAwxfiOv0gYN64
7	118277571	120521642	58	-0.3438	http://genome.ucsc.edu/cgi-bin/hgTracks?db=hg19&position=chr7:118227571-120571642&hgsid=443358811_uawFxZ8D0XFx7YCAwxfiOv0gYN64
7	120522003	140647888	926	-0.0968	http://genome.ucsc.edu/cgi-bin/hgTracks?db=hg19&position=chr7:120472003-140697888&hgsid=443358811_uawFxZ8D0XFx7YCAwxfiOv0gYN64
7	140658637	141118704	17	-0.4259	http://genome.ucsc.edu/cgi-bin/hgTracks?db=hg19&position=chr7:140608637-141168704&hgsid=443358811_uawFxZ8D0XFx7YCAwxfiOv0gYN64
7	141188229	146412141	142	-0.1332	http://genome.ucsc.edu/cgi-bin/hgTracks?db=hg19&position=chr7:141138229-146462141&hgsid=443358811_uawFxZ8D0XFx7YCAwxfiOv0gYN64
7	146493947	147911653	36	-0.3511	http://genome.ucsc.edu/cgi-bin/hgTracks?db=hg19&position=chr7:146443947-147961653&hgsid=443358811_uawFxZ8D0XFx7YCAwxfiOv0gYN64
7	147925634	159049287	642	-0.0901	http://genome.ucsc.edu/cgi-bin/hgTracks?db=hg19&position=chr7:147875634-159099287&hgsid=443358811_uawFxZ8D0XFx7YCAwxfiOv0gYN64
8	171734	1201448	30	-0.1303	http://genome.ucsc.edu/cgi-bin/hgTracks?db=hg19&position=chr8:121734-1251448&hgsid=443358811_uawFxZ8D0XFx7YCAwxfiOv0gYN64
8	1234035	1442616	5	-0.584	http://genome.ucsc.edu/cgi-bin/hgTracks?db=hg19&position=chr8:1184035-1492616&hgsid=443358811_uawFxZ8D0XFx7YCAwxfiOv0gYN64
8	1457217	2153791	30	-0.0577	http://genome.ucsc.edu/cgi-bin/hgTracks?db=hg19&position=chr8:1407217-2203791&hgsid=443358811_uawFxZ8D0XFx7YCAwxfiOv0gYN64
8	2210698	5803572	153	-0.2899	http://genome.ucsc.edu/cgi-bin/hgTracks?db=hg19&position=chr8:2160698-5853572&hgsid=443358811_uawFxZ8D0XFx7YCAwxfiOv0gYN64
8	5819601	6228590	30	-0.137	http://genome.ucsc.edu/cgi-bin/hgTracks?db=hg19&position=chr8:5769601-6278590&hgsid=443358811_uawFxZ8D0XFx7YCAwxfiOv0gYN64
8	6265759	9004481	113	-0.0022	http://genome.ucsc.edu/cgi-bin/hgTracks?db=hg19&position=chr8:6215759-9054481&hgsid=443358811_uawFxZ8D0XFx7YCAwxfiOv0gYN64
8	9031184	13857207	213	-0.1457	http://genome.ucsc.edu/cgi-bin/hgTracks?db=hg19&position=chr8:8981184-13907207&hgsid=443358811_uawFxZ8D0XFx7YCAwxfiOv0gYN64
8	13898772	16345770	92	-0.3455	http://genome.ucsc.edu/cgi-bin/hgTracks?db=hg19&position=chr8:13848772-16395770&hgsid=443358811_uawFxZ8D0XFx7YCAwxfiOv0gYN64
8	16355385	19694719	167	-0.084	http://genome.ucsc.edu/cgi-bin/hgTracks?db=hg19&position=chr8:16305385-19744719&hgsid=443358811_uawFxZ8D0XFx7YCAwxfiOv0gYN64
8	19713203	21585778	59	-0.2692	http://genome.ucsc.edu/cgi-bin/hgTracks?db=hg19&position=chr8:19663203-21635778&hgsid=443358811_uawFxZ8D0XFx7YCAwxfiOv0gYN64
8	21587635	22500850	83	-0.0065	http://genome.ucsc.edu/cgi-bin/hgTracks?db=hg19&position=chr8:21537635-22550850&hgsid=443358811_uawFxZ8D0XFx7YCAwxfiOv0gYN64
8	22520368	27057085	189	-0.1649	http://genome.ucsc.edu/cgi-bin/hgTracks?db=hg19&position=chr8:22470368-27107085&hgsid=443358811_uawFxZ8D0XFx7YCAwxfiOv0gYN64
8	27171953	31036776	264	-0.032	http://genome.ucsc.edu/cgi-bin/hgTracks?db=hg19&position=chr8:27121953-31086776&hgsid=443358811_uawFxZ8D0XFx7YCAwxfiOv0gYN64
8	31043469	32975766	45	-0.3169	http://genome.ucsc.edu/cgi-bin/hgTracks?db=hg19&position=chr8:30993469-33025766&hgsid=443358811_uawFxZ8D0XFx7YCAwxfiOv0gYN64
8	32983201	33439875	34	-0.0785	http://genome.ucsc.edu/cgi-bin/hgTracks?db=hg19&position=chr8:32933201-33489875&hgsid=443358811_uawFxZ8D0XFx7YCAwxfiOv0gYN64
8	33442375	36963216	77	-0.2701	http://genome.ucsc.edu/cgi-bin/hgTracks?db=hg19&position=chr8:33392375-37013216&hgsid=443358811_uawFxZ8D0XFx7YCAwxfiOv0gYN64
8	36979321	38249215	92	-0.0396	http://genome.ucsc.edu/cgi-bin/hgTracks?db=hg19&position=chr8:36929321-38299215&hgsid=443358811_uawFxZ8D0XFx7YCAwxfiOv0gYN64
8	38272817	38557097	19	-0.2358	http://genome.ucsc.edu/cgi-bin/hgTracks?db=hg19&position=chr8:38222817-38607097&hgsid=443358811_uawFxZ8D0XFx7YCAwxfiOv0gYN64
8	38613350	40082459	55	-0.0556	http://genome.ucsc.edu/cgi-bin/hgTracks?db=hg19&position=chr8:38563350-40132459&hgsid=443358811_uawFxZ8D0XFx7YCAwxfiOv0gYN64
8	40139543	41426932	41	-0.229	http://genome.ucsc.edu/cgi-bin/hgTracks?db=hg19&position=chr8:40089543-41476932&hgsid=443358811_uawFxZ8D0XFx7YCAwxfiOv0gYN64
8	41433792	43546429	150	-0.0709	http://genome.ucsc.edu/cgi-bin/hgTracks?db=hg19&position=chr8:41383792-43596429&hgsid=443358811_uawFxZ8D0XFx7YCAwxfiOv0gYN64
8	46941942	49026706	101	-0.0423	http://genome.ucsc.edu/cgi-bin/hgTracks?db=hg19&position=chr8:46891942-49076706&hgsid=443358811_uawFxZ8D0XFx7YCAwxfiOv0gYN64
8	49042156	66496597	458	-0.1582	http://genome.ucsc.edu/cgi-bin/hgTracks?db=hg19&position=chr8:48992156-66546597&hgsid=443358811_uawFxZ8D0XFx7YCAwxfiOv0gYN64
8	66527658	68496111	150	-0.0473	http://genome.ucsc.edu/cgi-bin/hgTracks?db=hg19&position=chr8:66477658-68546111&hgsid=443358811_uawFxZ8D0XFx7YCAwxfiOv0gYN64
8	68626685	70562219	41	-0.3293	http://genome.ucsc.edu/cgi-bin/hgTracks?db=hg19&position=chr8:68576685-70612219&hgsid=443358811_uawFxZ8D0XFx7YCAwxfiOv0gYN64
8	70615636	76439002	206	-0.1083	http://genome.ucsc.edu/cgi-bin/hgTracks?db=hg19&position=chr8:70565636-76489002&hgsid=443358811_uawFxZ8D0XFx7YCAwxfiOv0gYN64
8	76490319	79551647	51	-0.3122	http://genome.ucsc.edu/cgi-bin/hgTracks?db=hg19&position=chr8:76440319-79601647&hgsid=443358811_uawFxZ8D0XFx7YCAwxfiOv0gYN64
8	79609918	82936077	117	-0.0957	http://genome.ucsc.edu/cgi-bin/hgTracks?db=hg19&position=chr8:79559918-82986077&hgsid=443358811_uawFxZ8D0XFx7YCAwxfiOv0gYN64
8	82939330	85766301	56	-0.3134	http://genome.ucsc.edu/cgi-bin/hgTracks?db=hg19&position=chr8:82889330-85816301&hgsid=443358811_uawFxZ8D0XFx7YCAwxfiOv0gYN64
8	86051498	92258799	147	-0.1561	http://genome.ucsc.edu/cgi-bin/hgTracks?db=hg19&position=chr8:86001498-92308799&hgsid=443358811_uawFxZ8D0XFx7YCAwxfiOv0gYN64
8	92354145	94673770	37	-0.3019	http://genome.ucsc.edu/cgi-bin/hgTracks?db=hg19&position=chr8:92304145-94723770&hgsid=443358811_uawFxZ8D0XFx7YCAwxfiOv0gYN64
8	94734646	96360759	129	-0.0184	http://genome.ucsc.edu/cgi-bin/hgTracks?db=hg19&position=chr8:94684646-96410759&hgsid=443358811_uawFxZ8D0XFx7YCAwxfiOv0gYN64
8	96417223	98638662	55	-0.2882	http://genome.ucsc.edu/cgi-bin/hgTracks?db=hg19&position=chr8:96367223-98688662&hgsid=443358811_uawFxZ8D0XFx7YCAwxfiOv0gYN64
8	98644272	104851012	356	-0.0351	http://genome.ucsc.edu/cgi-bin/hgTracks?db=hg19&position=chr8:98594272-104901012&hgsid=443358811_uawFxZ8D0XFx7YCAwxfiOv0gYN64
8	104981974	107389417	63	-0.3222	http://genome.ucsc.edu/cgi-bin/hgTracks?db=hg19&position=chr8:104931974-107439417&hgsid=443358811_uawFxZ8D0XFx7YCAwxfiOv0gYN64
8	107391755	113051768	113	-0.162	http://genome.ucsc.edu/cgi-bin/hgTracks?db=hg19&position=chr8:107341755-113101768&hgsid=443358811_uawFxZ8D0XFx7YCAwxfiOv0gYN64
8	113059997	116832129	94	-0.331	http://genome.ucsc.edu/cgi-bin/hgTracks?db=hg19&position=chr8:113009997-116882129&hgsid=443358811_uawFxZ8D0XFx7YCAwxfiOv0gYN64
8	116926394	134531907	581	-0.0885	http://genome.ucsc.edu/cgi-bin/hgTracks?db=hg19&position=chr8:116876394-134581907&hgsid=443358811_uawFxZ8D0XFx7YCAwxfiOv0gYN64
8	134547761	140604036	114	-0.228	http://genome.ucsc.edu/cgi-bin/hgTracks?db=hg19&position=chr8:134497761-140654036&hgsid=443358811_uawFxZ8D0XFx7YCAwxfiOv0gYN64
8	140680666	146276311	355	-0.0446	http://genome.ucsc.edu/cgi-bin/hgTracks?db=hg19&position=chr8:140630666-146326311&hgsid=443358811_uawFxZ8D0XFx7YCAwxfiOv0gYN64
9	213732	9150502	375	-0.0483	http://genome.ucsc.edu/cgi-bin/hgTracks?db=hg19&position=chr9:163732-9200502&hgsid=443358811_uawFxZ8D0XFx7YCAwxfiOv0gYN64
9	9208810	18961161	268	-0.1512	http://genome.ucsc.edu/cgi-bin/hgTracks?db=hg19&position=chr9:9158810-19011161&hgsid=443358811_uawFxZ8D0XFx7YCAwxfiOv0gYN64
9	18977711	21977344	135	-0.0188	http://genome.ucsc.edu/cgi-bin/hgTracks?db=hg19&position=chr9:18927711-22027344&hgsid=443358811_uawFxZ8D0XFx7YCAwxfiOv0gYN64
9	22013451	26822992	86	-0.1912	http://genome.ucsc.edu/cgi-bin/hgTracks?db=hg19&position=chr9:21963451-26872992&hgsid=443358811_uawFxZ8D0XFx7YCAwxfiOv0gYN64
9	26876870	27390262	38	0.0363	http://genome.ucsc.edu/cgi-bin/hgTracks?db=hg19&position=chr9:26826870-27440262&hgsid=443358811_uawFxZ8D0XFx7YCAwxfiOv0gYN64
9	27488399	32184384	72	-0.2169	http://genome.ucsc.edu/cgi-bin/hgTracks?db=hg19&position=chr9:27438399-32234384&hgsid=443358811_uawFxZ8D0XFx7YCAwxfiOv0gYN64
9	32377551	44898559	467	-0.0352	http://genome.ucsc.edu/cgi-bin/hgTracks?db=hg19&position=chr9:32327551-44948559&hgsid=443358811_uawFxZ8D0XFx7YCAwxfiOv0gYN64
9	65604940	81147071	361	-0.0739	http://genome.ucsc.edu/cgi-bin/hgTracks?db=hg19&position=chr9:65554940-81197071&hgsid=443358811_uawFxZ8D0XFx7YCAwxfiOv0gYN64
9	81159472	85551668	120	-0.2008	http://genome.ucsc.edu/cgi-bin/hgTracks?db=hg19&position=chr9:81109472-85601668&hgsid=443358811_uawFxZ8D0XFx7YCAwxfiOv0gYN64
9	85644306	103342384	767	-0.0702	http://genome.ucsc.edu/cgi-bin/hgTracks?db=hg19&position=chr9:85594306-103392384&hgsid=443358811_uawFxZ8D0XFx7YCAwxfiOv0gYN64
9	103344646	107300029	84	-0.2432	http://genome.ucsc.edu/cgi-bin/hgTracks?db=hg19&position=chr9:103294646-107350029&hgsid=443358811_uawFxZ8D0XFx7YCAwxfiOv0gYN64
9	107369667	117447454	478	-0.0518	http://genome.ucsc.edu/cgi-bin/hgTracks?db=hg19&position=chr9:107319667-117497454&hgsid=443358811_uawFxZ8D0XFx7YCAwxfiOv0gYN64
9	117486777	123208539	101	-0.2394	http://genome.ucsc.edu/cgi-bin/hgTracks?db=hg19&position=chr9:117436777-123258539&hgsid=443358811_uawFxZ8D0XFx7YCAwxfiOv0gYN64
9	123243781	141004890	1368	-0.0583	http://genome.ucsc.edu/cgi-bin/hgTracks?db=hg19&position=chr9:123193781-141054890&hgsid=443358811_uawFxZ8D0XFx7YCAwxfiOv0gYN64
10	146905	1821206	81	-0.0509	http://genome.ucsc.edu/cgi-bin/hgTracks?db=hg19&position=chr10:96905-1871206&hgsid=443358811_uawFxZ8D0XFx7YCAwxfiOv0gYN64
10	1823977	3013158	33	-0.2806	http://genome.ucsc.edu/cgi-bin/hgTracks?db=hg19&position=chr10:1773977-3063158&hgsid=443358811_uawFxZ8D0XFx7YCAwxfiOv0gYN64
10	3023233	6647619	178	-0.0239	http://genome.ucsc.edu/cgi-bin/hgTracks?db=hg19&position=chr10:2973233-6697619&hgsid=443358811_uawFxZ8D0XFx7YCAwxfiOv0gYN64
10	6683085	10009401	115	-0.2364	http://genome.ucsc.edu/cgi-bin/hgTracks?db=hg19&position=chr10:6633085-10059401&hgsid=443358811_uawFxZ8D0XFx7YCAwxfiOv0gYN64
10	10037315	38915103	1664	-0.092	http://genome.ucsc.edu/cgi-bin/hgTracks?db=hg19&position=chr10:9987315-38965103&hgsid=443358811_uawFxZ8D0XFx7YCAwxfiOv0gYN64
10	42866696	52640755	197	-0.0494	http://genome.ucsc.edu/cgi-bin/hgTracks?db=hg19&position=chr10:42816696-52690755&hgsid=443358811_uawFxZ8D0XFx7YCAwxfiOv0gYN64
10	52665485	61215475	201	-0.2278	http://genome.ucsc.edu/cgi-bin/hgTracks?db=hg19&position=chr10:52615485-61265475&hgsid=443358811_uawFxZ8D0XFx7YCAwxfiOv0gYN64
10	61307330	65645765	184	-0.0706	http://genome.ucsc.edu/cgi-bin/hgTracks?db=hg19&position=chr10:61257330-65695765&hgsid=443358811_uawFxZ8D0XFx7YCAwxfiOv0gYN64
10	65657912	69539082	80	-0.2374	http://genome.ucsc.edu/cgi-bin/hgTracks?db=hg19&position=chr10:65607912-69589082&hgsid=443358811_uawFxZ8D0XFx7YCAwxfiOv0gYN64
10	69560426	72395172	315	-0.0398	http://genome.ucsc.edu/cgi-bin/hgTracks?db=hg19&position=chr10:69510426-72445172&hgsid=443358811_uawFxZ8D0XFx7YCAwxfiOv0gYN64
10	72413829	73851196	52	-0.1756	http://genome.ucsc.edu/cgi-bin/hgTracks?db=hg19&position=chr10:72363829-73901196&hgsid=443358811_uawFxZ8D0XFx7YCAwxfiOv0gYN64
10	73853430	79836705	334	-0.0142	http://genome.ucsc.edu/cgi-bin/hgTracks?db=hg19&position=chr10:73803430-79886705&hgsid=443358811_uawFxZ8D0XFx7YCAwxfiOv0gYN64
10	79839662	88148844	164	-0.1868	http://genome.ucsc.edu/cgi-bin/hgTracks?db=hg19&position=chr10:79789662-88198844&hgsid=443358811_uawFxZ8D0XFx7YCAwxfiOv0gYN64
10	88176051	100166368	565	-0.0502	http://genome.ucsc.edu/cgi-bin/hgTracks?db=hg19&position=chr10:88126051-100216368&hgsid=443358811_uawFxZ8D0XFx7YCAwxfiOv0gYN64
10	100203508	101334335	27	-0.3381	http://genome.ucsc.edu/cgi-bin/hgTracks?db=hg19&position=chr10:100153508-101384335&hgsid=443358811_uawFxZ8D0XFx7YCAwxfiOv0gYN64
10	101336359	106103508	402	-0.0299	http://genome.ucsc.edu/cgi-bin/hgTracks?db=hg19&position=chr10:101286359-106153508&hgsid=443358811_uawFxZ8D0XFx7YCAwxfiOv0gYN64
10	106168575	111871885	125	-0.2589	http://genome.ucsc.edu/cgi-bin/hgTracks?db=hg19&position=chr10:106118575-111921885&hgsid=443358811_uawFxZ8D0XFx7YCAwxfiOv0gYN64
10	111882394	129251652	640	-0.0659	http://genome.ucsc.edu/cgi-bin/hgTracks?db=hg19&position=chr10:111832394-129301652&hgsid=443358811_uawFxZ8D0XFx7YCAwxfiOv0gYN64
10	129345469	134986216	132	-0.1834	http://genome.ucsc.edu/cgi-bin/hgTracks?db=hg19&position=chr10:129295469-135036216&hgsid=443358811_uawFxZ8D0XFx7YCAwxfiOv0gYN64
10	135029900	135274018	33	-0.037	http://genome.ucsc.edu/cgi-bin/hgTracks?db=hg19&position=chr10:134979900-135324018&hgsid=443358811_uawFxZ8D0XFx7YCAwxfiOv0gYN64
11	201303	4684302	271	-0.0397	http://genome.ucsc.edu/cgi-bin/hgTracks?db=hg19&position=chr11:151303-4734302&hgsid=443358811_uawFxZ8D0XFx7YCAwxfiOv0gYN64
11	4714670	5615533	16	-0.3588	http://genome.ucsc.edu/cgi-bin/hgTracks?db=hg19&position=chr11:4664670-5665533&hgsid=443358811_uawFxZ8D0XFx7YCAwxfiOv0gYN64
11	5616948	21168307	525	-0.0492	http://genome.ucsc.edu/cgi-bin/hgTracks?db=hg19&position=chr11:5566948-21218307&hgsid=443358811_uawFxZ8D0XFx7YCAwxfiOv0gYN64
11	21413207	32653765	228	-0.174	http://genome.ucsc.edu/cgi-bin/hgTracks?db=hg19&position=chr11:21363207-32703765&hgsid=443358811_uawFxZ8D0XFx7YCAwxfiOv0gYN64
11	32706264	33798143	86	-0.0517	http://genome.ucsc.edu/cgi-bin/hgTracks?db=hg19&position=chr11:32656264-33848143&hgsid=443358811_uawFxZ8D0XFx7YCAwxfiOv0gYN64
11	33805348	34009917	11	-0.3555	http://genome.ucsc.edu/cgi-bin/hgTracks?db=hg19&position=chr11:33755348-34059917&hgsid=443358811_uawFxZ8D0XFx7YCAwxfiOv0gYN64
11	34036336	36659436	81	-0.0138	http://genome.ucsc.edu/cgi-bin/hgTracks?db=hg19&position=chr11:33986336-36709436&hgsid=443358811_uawFxZ8D0XFx7YCAwxfiOv0gYN64
11	36684292	45945257	232	-0.1853	http://genome.ucsc.edu/cgi-bin/hgTracks?db=hg19&position=chr11:36634292-45995257&hgsid=443358811_uawFxZ8D0XFx7YCAwxfiOv0gYN64
11	45964673	48200396	268	-0.0279	http://genome.ucsc.edu/cgi-bin/hgTracks?db=hg19&position=chr11:45914673-48250396&hgsid=443358811_uawFxZ8D0XFx7YCAwxfiOv0gYN64
11	48247024	50276359	21	-0.2876	http://genome.ucsc.edu/cgi-bin/hgTracks?db=hg19&position=chr11:48197024-50326359&hgsid=443358811_uawFxZ8D0XFx7YCAwxfiOv0gYN64
11	55305519	59191604	133	-0.1094	http://genome.ucsc.edu/cgi-bin/hgTracks?db=hg19&position=chr11:55255519-59241604&hgsid=443358811_uawFxZ8D0XFx7YCAwxfiOv0gYN64
11	59235684	59280555	4	-0.6775	http://genome.ucsc.edu/cgi-bin/hgTracks?db=hg19&position=chr11:59185684-59330555&hgsid=443358811_uawFxZ8D0XFx7YCAwxfiOv0gYN64
11	59292153	130990089	3004	-0.0831	http://genome.ucsc.edu/cgi-bin/hgTracks?db=hg19&position=chr11:59242153-131040089&hgsid=443358811_uawFxZ8D0XFx7YCAwxfiOv0gYN64
11	131025010	134939058	73	-0.2538	http://genome.ucsc.edu/cgi-bin/hgTracks?db=hg19&position=chr11:130975010-134989058&hgsid=443358811_uawFxZ8D0XFx7YCAwxfiOv0gYN64
12	200659	7866469	451	-0.0549	http://genome.ucsc.edu/cgi-bin/hgTracks?db=hg19&position=chr12:150659-7916469&hgsid=443358811_uawFxZ8D0XFx7YCAwxfiOv0gYN64
12	7868110	10363588	175	-0.1764	http://genome.ucsc.edu/cgi-bin/hgTracks?db=hg19&position=chr12:7818110-10413588&hgsid=443358811_uawFxZ8D0XFx7YCAwxfiOv0gYN64
12	10363811	14922121	241	-0.0051	http://genome.ucsc.edu/cgi-bin/hgTracks?db=hg19&position=chr12:10313811-14972121&hgsid=443358811_uawFxZ8D0XFx7YCAwxfiOv0gYN64
12	15006970	19233093	78	-0.1522	http://genome.ucsc.edu/cgi-bin/hgTracks?db=hg19&position=chr12:14956970-19283093&hgsid=443358811_uawFxZ8D0XFx7YCAwxfiOv0gYN64
12	19236699	19677102	64	-0.0316	http://genome.ucsc.edu/cgi-bin/hgTracks?db=hg19&position=chr12:19186699-19727102&hgsid=443358811_uawFxZ8D0XFx7YCAwxfiOv0gYN64
12	19678173	26821772	219	-0.1715	http://genome.ucsc.edu/cgi-bin/hgTracks?db=hg19&position=chr12:19628173-26871772&hgsid=443358811_uawFxZ8D0XFx7YCAwxfiOv0gYN64
12	26840977	34415851	329	-0.0501	http://genome.ucsc.edu/cgi-bin/hgTracks?db=hg19&position=chr12:26790977-34465851&hgsid=443358811_uawFxZ8D0XFx7YCAwxfiOv0gYN64
12	37949574	85891561	1827	-0.0816	http://genome.ucsc.edu/cgi-bin/hgTracks?db=hg19&position=chr12:37899574-85941561&hgsid=443358811_uawFxZ8D0XFx7YCAwxfiOv0gYN64
12	85894103	87662691	46	-0.2743	http://genome.ucsc.edu/cgi-bin/hgTracks?db=hg19&position=chr12:85844103-87712691&hgsid=443358811_uawFxZ8D0XFx7YCAwxfiOv0gYN64
12	87720375	125738554	2321	-0.0626	http://genome.ucsc.edu/cgi-bin/hgTracks?db=hg19&position=chr12:87670375-125788554&hgsid=443358811_uawFxZ8D0XFx7YCAwxfiOv0gYN64
12	125745302	132383427	239	-0.1525	http://genome.ucsc.edu/cgi-bin/hgTracks?db=hg19&position=chr12:125695302-132433427&hgsid=443358811_uawFxZ8D0XFx7YCAwxfiOv0gYN64
12	132388699	133813300	127	-0.0143	http://genome.ucsc.edu/cgi-bin/hgTracks?db=hg19&position=chr12:132338699-133863300&hgsid=443358811_uawFxZ8D0XFx7YCAwxfiOv0gYN64
13	19402378	20148239	30	-0.3087	http://genome.ucsc.edu/cgi-bin/hgTracks?db=hg19&position=chr13:19352378-20198239&hgsid=443358811_uawFxZ8D0XFx7YCAwxfiOv0gYN64
13	20163931	22151968	218	-0.0457	http://genome.ucsc.edu/cgi-bin/hgTracks?db=hg19&position=chr13:20113931-22201968&hgsid=443358811_uawFxZ8D0XFx7YCAwxfiOv0gYN64
13	22160546	24111942	92	-0.239	http://genome.ucsc.edu/cgi-bin/hgTracks?db=hg19&position=chr13:22110546-24161942&hgsid=443358811_uawFxZ8D0XFx7YCAwxfiOv0gYN64
13	24155255	25337343	54	-0.0387	http://genome.ucsc.edu/cgi-bin/hgTracks?db=hg19&position=chr13:24105255-25387343&hgsid=443358811_uawFxZ8D0XFx7YCAwxfiOv0gYN64
13	25340084	27475755	102	-0.2425	http://genome.ucsc.edu/cgi-bin/hgTracks?db=hg19&position=chr13:25290084-27525755&hgsid=443358811_uawFxZ8D0XFx7YCAwxfiOv0gYN64
13	27505699	33362404	301	-0.0995	http://genome.ucsc.edu/cgi-bin/hgTracks?db=hg19&position=chr13:27455699-33412404&hgsid=443358811_uawFxZ8D0XFx7YCAwxfiOv0gYN64
13	33383678	40974161	208	-0.2399	http://genome.ucsc.edu/cgi-bin/hgTracks?db=hg19&position=chr13:33333678-41024161&hgsid=443358811_uawFxZ8D0XFx7YCAwxfiOv0gYN64
13	40984134	41836192	63	-0.0122	http://genome.ucsc.edu/cgi-bin/hgTracks?db=hg19&position=chr13:40934134-41886192&hgsid=443358811_uawFxZ8D0XFx7YCAwxfiOv0gYN64
13	41857722	41884525	4	-0.44	http://genome.ucsc.edu/cgi-bin/hgTracks?db=hg19&position=chr13:41807722-41934525&hgsid=443358811_uawFxZ8D0XFx7YCAwxfiOv0gYN64
13	41914800	42818759	30	0.029	http://genome.ucsc.edu/cgi-bin/hgTracks?db=hg19&position=chr13:41864800-42868759&hgsid=443358811_uawFxZ8D0XFx7YCAwxfiOv0gYN64
13	42823231	43856579	31	-0.2539	http://genome.ucsc.edu/cgi-bin/hgTracks?db=hg19&position=chr13:42773231-43906579&hgsid=443358811_uawFxZ8D0XFx7YCAwxfiOv0gYN64
13	43944222	47369880	193	-0.0577	http://genome.ucsc.edu/cgi-bin/hgTracks?db=hg19&position=chr13:43894222-47419880&hgsid=443358811_uawFxZ8D0XFx7YCAwxfiOv0gYN64
13	47383805	48479725	13	-0.4062	http://genome.ucsc.edu/cgi-bin/hgTracks?db=hg19&position=chr13:47333805-48529725&hgsid=443358811_uawFxZ8D0XFx7YCAwxfiOv0gYN64
13	48496854	53508737	268	-0.0627	http://genome.ucsc.edu/cgi-bin/hgTracks?db=hg19&position=chr13:48446854-53558737&hgsid=443358811_uawFxZ8D0XFx7YCAwxfiOv0gYN64
13	53510161	60109294	152	-0.312	http://genome.ucsc.edu/cgi-bin/hgTracks?db=hg19&position=chr13:53460161-60159294&hgsid=443358811_uawFxZ8D0XFx7YCAwxfiOv0gYN64
13	60130253	61156207	33	-0.0561	http://genome.ucsc.edu/cgi-bin/hgTracks?db=hg19&position=chr13:60080253-61206207&hgsid=443358811_uawFxZ8D0XFx7YCAwxfiOv0gYN64
13	61178499	71833553	304	-0.334	http://genome.ucsc.edu/cgi-bin/hgTracks?db=hg19&position=chr13:61128499-71883553&hgsid=443358811_uawFxZ8D0XFx7YCAwxfiOv0gYN64
13	71850201	72566429	34	-0.0212	http://genome.ucsc.edu/cgi-bin/hgTracks?db=hg19&position=chr13:71800201-72616429&hgsid=443358811_uawFxZ8D0XFx7YCAwxfiOv0gYN64
13	72574428	73220298	8	-0.62	http://genome.ucsc.edu/cgi-bin/hgTracks?db=hg19&position=chr13:72524428-73270298&hgsid=443358811_uawFxZ8D0XFx7YCAwxfiOv0gYN64
13	73245905	74200707	68	0.0185	http://genome.ucsc.edu/cgi-bin/hgTracks?db=hg19&position=chr13:73195905-74250707&hgsid=443358811_uawFxZ8D0XFx7YCAwxfiOv0gYN64
13	74273216	75773581	43	-0.2565	http://genome.ucsc.edu/cgi-bin/hgTracks?db=hg19&position=chr13:74223216-75823581&hgsid=443358811_uawFxZ8D0XFx7YCAwxfiOv0gYN64
13	75808386	76309610	33	-0.0564	http://genome.ucsc.edu/cgi-bin/hgTracks?db=hg19&position=chr13:75758386-76359610&hgsid=443358811_uawFxZ8D0XFx7YCAwxfiOv0gYN64
13	76459427	77553710	26	-0.3985	http://genome.ucsc.edu/cgi-bin/hgTracks?db=hg19&position=chr13:76409427-77603710&hgsid=443358811_uawFxZ8D0XFx7YCAwxfiOv0gYN64
13	77577160	77891792	22	0.0409	http://genome.ucsc.edu/cgi-bin/hgTracks?db=hg19&position=chr13:77527160-77941792&hgsid=443358811_uawFxZ8D0XFx7YCAwxfiOv0gYN64
13	77954361	79778730	45	-0.324	http://genome.ucsc.edu/cgi-bin/hgTracks?db=hg19&position=chr13:77904361-79828730&hgsid=443358811_uawFxZ8D0XFx7YCAwxfiOv0gYN64
13	79858840	82065422	78	-0.1163	http://genome.ucsc.edu/cgi-bin/hgTracks?db=hg19&position=chr13:79808840-82115422&hgsid=443358811_uawFxZ8D0XFx7YCAwxfiOv0gYN64
13	82132563	84806308	63	-0.4406	http://genome.ucsc.edu/cgi-bin/hgTracks?db=hg19&position=chr13:82082563-84856308&hgsid=443358811_uawFxZ8D0XFx7YCAwxfiOv0gYN64
13	84873829	96141196	376	-0.2781	http://genome.ucsc.edu/cgi-bin/hgTracks?db=hg19&position=chr13:84823829-96191196&hgsid=443358811_uawFxZ8D0XFx7YCAwxfiOv0gYN64
13	96169908	98802301	108	-0.1735	http://genome.ucsc.edu/cgi-bin/hgTracks?db=hg19&position=chr13:96119908-98852301&hgsid=443358811_uawFxZ8D0XFx7YCAwxfiOv0gYN64
13	98818969	101322921	175	-0.039	http://genome.ucsc.edu/cgi-bin/hgTracks?db=hg19&position=chr13:98768969-101372921&hgsid=443358811_uawFxZ8D0XFx7YCAwxfiOv0gYN64
13	101330535	103958701	72	-0.1929	http://genome.ucsc.edu/cgi-bin/hgTracks?db=hg19&position=chr13:101280535-104008701&hgsid=443358811_uawFxZ8D0XFx7YCAwxfiOv0gYN64
13	104072734	105428622	49	-0.3888	http://genome.ucsc.edu/cgi-bin/hgTracks?db=hg19&position=chr13:104022734-105478622&hgsid=443358811_uawFxZ8D0XFx7YCAwxfiOv0gYN64
13	105435903	106239614	23	-0.2174	http://genome.ucsc.edu/cgi-bin/hgTracks?db=hg19&position=chr13:105385903-106289614&hgsid=443358811_uawFxZ8D0XFx7YCAwxfiOv0gYN64
13	106248896	107126227	29	0.0534	http://genome.ucsc.edu/cgi-bin/hgTracks?db=hg19&position=chr13:106198896-107176227&hgsid=443358811_uawFxZ8D0XFx7YCAwxfiOv0gYN64
13	107163080	111035954	102	-0.2061	http://genome.ucsc.edu/cgi-bin/hgTracks?db=hg19&position=chr13:107113080-111085954&hgsid=443358811_uawFxZ8D0XFx7YCAwxfiOv0gYN64
13	111104468	115093261	169	-0.0325	http://genome.ucsc.edu/cgi-bin/hgTracks?db=hg19&position=chr13:111054468-115143261&hgsid=443358811_uawFxZ8D0XFx7YCAwxfiOv0gYN64
14	19100807	25613831	284	-0.0588	http://genome.ucsc.edu/cgi-bin/hgTracks?db=hg19&position=chr14:19050807-25663831&hgsid=443358811_uawFxZ8D0XFx7YCAwxfiOv0gYN64
14	25633452	30920918	102	-0.2895	http://genome.ucsc.edu/cgi-bin/hgTracks?db=hg19&position=chr14:25583452-30970918&hgsid=443358811_uawFxZ8D0XFx7YCAwxfiOv0gYN64
14	31004803	33379363	131	-0.0002	http://genome.ucsc.edu/cgi-bin/hgTracks?db=hg19&position=chr14:30954803-33429363&hgsid=443358811_uawFxZ8D0XFx7YCAwxfiOv0gYN64
14	33394074	34795175	30	-0.2287	http://genome.ucsc.edu/cgi-bin/hgTracks?db=hg19&position=chr14:33344074-34845175&hgsid=443358811_uawFxZ8D0XFx7YCAwxfiOv0gYN64
14	34808738	36357152	162	-0.0267	http://genome.ucsc.edu/cgi-bin/hgTracks?db=hg19&position=chr14:34758738-36407152&hgsid=443358811_uawFxZ8D0XFx7YCAwxfiOv0gYN64
14	36359211	50063932	275	-0.1696	http://genome.ucsc.edu/cgi-bin/hgTracks?db=hg19&position=chr14:36309211-50113932&hgsid=443358811_uawFxZ8D0XFx7YCAwxfiOv0gYN64
14	50064374	82246826	1371	-0.0578	http://genome.ucsc.edu/cgi-bin/hgTracks?db=hg19&position=chr14:50014374-82296826&hgsid=443358811_uawFxZ8D0XFx7YCAwxfiOv0gYN64
14	82349646	88665231	118	-0.2598	http://genome.ucsc.edu/cgi-bin/hgTracks?db=hg19&position=chr14:82299646-88715231&hgsid=443358811_uawFxZ8D0XFx7YCAwxfiOv0gYN64
14	88683219	93789521	287	-0.0402	http://genome.ucsc.edu/cgi-bin/hgTracks?db=hg19&position=chr14:88633219-93839521&hgsid=443358811_uawFxZ8D0XFx7YCAwxfiOv0gYN64
14	93797945	100692871	220	-0.1299	http://genome.ucsc.edu/cgi-bin/hgTracks?db=hg19&position=chr14:93747945-100742871&hgsid=443358811_uawFxZ8D0XFx7YCAwxfiOv0gYN64
14	100697419	107268113	424	-0.0375	http://genome.ucsc.edu/cgi-bin/hgTracks?db=hg19&position=chr14:100647419-107318113&hgsid=443358811_uawFxZ8D0XFx7YCAwxfiOv0gYN64
15	20065002	29302463	278	-0.1861	http://genome.ucsc.edu/cgi-bin/hgTracks?db=hg19&position=chr15:20015002-29352463&hgsid=443358811_uawFxZ8D0XFx7YCAwxfiOv0gYN64
15	29317467	86398265	2680	-0.0564	http://genome.ucsc.edu/cgi-bin/hgTracks?db=hg19&position=chr15:29267467-86448265&hgsid=443358811_uawFxZ8D0XFx7YCAwxfiOv0gYN64
15	86442356	89454672	62	-0.225	http://genome.ucsc.edu/cgi-bin/hgTracks?db=hg19&position=chr15:86392356-89504672&hgsid=443358811_uawFxZ8D0XFx7YCAwxfiOv0gYN64
15	89463022	93604390	272	-0.0396	http://genome.ucsc.edu/cgi-bin/hgTracks?db=hg19&position=chr15:89413022-93654390&hgsid=443358811_uawFxZ8D0XFx7YCAwxfiOv0gYN64
15	93620965	95633910	63	-0.1387	http://genome.ucsc.edu/cgi-bin/hgTracks?db=hg19&position=chr15:93570965-95683910&hgsid=443358811_uawFxZ8D0XFx7YCAwxfiOv0gYN64
15	95724783	97676345	62	-0.3073	http://genome.ucsc.edu/cgi-bin/hgTracks?db=hg19&position=chr15:95674783-97726345&hgsid=443358811_uawFxZ8D0XFx7YCAwxfiOv0gYN64
15	97734509	102359691	171	-0.0457	http://genome.ucsc.edu/cgi-bin/hgTracks?db=hg19&position=chr15:97684509-102409691&hgsid=443358811_uawFxZ8D0XFx7YCAwxfiOv0gYN64
16	89487	868002	148	-0.0109	http://genome.ucsc.edu/cgi-bin/hgTracks?db=hg19&position=chr16:39487-918002&hgsid=443358811_uawFxZ8D0XFx7YCAwxfiOv0gYN64
16	876456	1320907	27	-0.253	http://genome.ucsc.edu/cgi-bin/hgTracks?db=hg19&position=chr16:826456-1370907&hgsid=443358811_uawFxZ8D0XFx7YCAwxfiOv0gYN64
16	1341042	5091016	604	-0.0565	http://genome.ucsc.edu/cgi-bin/hgTracks?db=hg19&position=chr16:1291042-5141016&hgsid=443358811_uawFxZ8D0XFx7YCAwxfiOv0gYN64
16	5093070	8371290	196	-0.2572	http://genome.ucsc.edu/cgi-bin/hgTracks?db=hg19&position=chr16:5043070-8421290&hgsid=443358811_uawFxZ8D0XFx7YCAwxfiOv0gYN64
16	8380976	35081384	1942	-0.0762	http://genome.ucsc.edu/cgi-bin/hgTracks?db=hg19&position=chr16:8330976-35131384&hgsid=443358811_uawFxZ8D0XFx7YCAwxfiOv0gYN64
16	46510261	58783948	628	-0.0786	http://genome.ucsc.edu/cgi-bin/hgTracks?db=hg19&position=chr16:46460261-58833948&hgsid=443358811_uawFxZ8D0XFx7YCAwxfiOv0gYN64
16	58784318	65143777	168	-0.224	http://genome.ucsc.edu/cgi-bin/hgTracks?db=hg19&position=chr16:58734318-65193777&hgsid=443358811_uawFxZ8D0XFx7YCAwxfiOv0gYN64
16	65196796	75704999	888	-0.0334	http://genome.ucsc.edu/cgi-bin/hgTracks?db=hg19&position=chr16:65146796-75754999&hgsid=443358811_uawFxZ8D0XFx7YCAwxfiOv0gYN64
16	75706686	83859112	397	-0.1566	http://genome.ucsc.edu/cgi-bin/hgTracks?db=hg19&position=chr16:75656686-83909112&hgsid=443358811_uawFxZ8D0XFx7YCAwxfiOv0gYN64
16	83874885	90148140	618	-0.0468	http://genome.ucsc.edu/cgi-bin/hgTracks?db=hg19&position=chr16:83824885-90198140&hgsid=443358811_uawFxZ8D0XFx7YCAwxfiOv0gYN64
17	15018	22139608	1643	-0.0654	http://genome.ucsc.edu/cgi-bin/hgTracks?db=hg19&position=chr17:-34982-22189608&hgsid=443358811_uawFxZ8D0XFx7YCAwxfiOv0gYN64
17	25290969	60725483	2199	-0.0568	http://genome.ucsc.edu/cgi-bin/hgTracks?db=hg19&position=chr17:25240969-60775483&hgsid=443358811_uawFxZ8D0XFx7YCAwxfiOv0gYN64
17	60736619	61467855	43	-0.3002	http://genome.ucsc.edu/cgi-bin/hgTracks?db=hg19&position=chr17:60686619-61517855&hgsid=443358811_uawFxZ8D0XFx7YCAwxfiOv0gYN64
17	61521388	81098626	1396	-0.0664	http://genome.ucsc.edu/cgi-bin/hgTracks?db=hg19&position=chr17:61471388-81148626&hgsid=443358811_uawFxZ8D0XFx7YCAwxfiOv0gYN64
18	69211	4030004	211	-0.0573	http://genome.ucsc.edu/cgi-bin/hgTracks?db=hg19&position=chr18:19211-4080004&hgsid=443358811_uawFxZ8D0XFx7YCAwxfiOv0gYN64
18	4042473	8630875	114	-0.2264	http://genome.ucsc.edu/cgi-bin/hgTracks?db=hg19&position=chr18:3992473-8680875&hgsid=443358811_uawFxZ8D0XFx7YCAwxfiOv0gYN64
18	8641538	15355951	278	-0.0731	http://genome.ucsc.edu/cgi-bin/hgTracks?db=hg19&position=chr18:8591538-15405951&hgsid=443358811_uawFxZ8D0XFx7YCAwxfiOv0gYN64
18	18548269	78014083	1523	-0.1216	http://genome.ucsc.edu/cgi-bin/hgTracks?db=hg19&position=chr18:18498269-78064083&hgsid=443358811_uawFxZ8D0XFx7YCAwxfiOv0gYN64
19	260372	22607914	3387	-0.073	http://genome.ucsc.edu/cgi-bin/hgTracks?db=hg19&position=chr19:210372-22657914&hgsid=443358811_uawFxZ8D0XFx7YCAwxfiOv0gYN64
19	22616350	23373543	55	-0.2776	http://genome.ucsc.edu/cgi-bin/hgTracks?db=hg19&position=chr19:22566350-23423543&hgsid=443358811_uawFxZ8D0XFx7YCAwxfiOv0gYN64
19	23373991	24361551	85	-0.0388	http://genome.ucsc.edu/cgi-bin/hgTracks?db=hg19&position=chr19:23323991-24411551&hgsid=443358811_uawFxZ8D0XFx7YCAwxfiOv0gYN64
19	28282524	32788964	144	-0.1965	http://genome.ucsc.edu/cgi-bin/hgTracks?db=hg19&position=chr19:28232524-32838964&hgsid=443358811_uawFxZ8D0XFx7YCAwxfiOv0gYN64
19	32813911	59088329	3187	-0.0718	http://genome.ucsc.edu/cgi-bin/hgTracks?db=hg19&position=chr19:32763911-59138329&hgsid=443358811_uawFxZ8D0XFx7YCAwxfiOv0gYN64
20	134165	26248042	1011	-0.1099	http://genome.ucsc.edu/cgi-bin/hgTracks?db=hg19&position=chr20:84165-26298042&hgsid=443358811_uawFxZ8D0XFx7YCAwxfiOv0gYN64
20	29583855	31556174	174	-0.0842	http://genome.ucsc.edu/cgi-bin/hgTracks?db=hg19&position=chr20:29533855-31606174&hgsid=443358811_uawFxZ8D0XFx7YCAwxfiOv0gYN64
20	31566729	31588377	4	-0.635	http://genome.ucsc.edu/cgi-bin/hgTracks?db=hg19&position=chr20:31516729-31638377&hgsid=443358811_uawFxZ8D0XFx7YCAwxfiOv0gYN64
20	31592656	36016867	535	-0.0419	http://genome.ucsc.edu/cgi-bin/hgTracks?db=hg19&position=chr20:31542656-36066867&hgsid=443358811_uawFxZ8D0XFx7YCAwxfiOv0gYN64
20	36098795	42773963	268	-0.1687	http://genome.ucsc.edu/cgi-bin/hgTracks?db=hg19&position=chr20:36048795-42823963&hgsid=443358811_uawFxZ8D0XFx7YCAwxfiOv0gYN64
20	42830734	43341805	54	0.0107	http://genome.ucsc.edu/cgi-bin/hgTracks?db=hg19&position=chr20:42780734-43391805&hgsid=443358811_uawFxZ8D0XFx7YCAwxfiOv0gYN64
20	43349866	43447332	9	-0.3956	http://genome.ucsc.edu/cgi-bin/hgTracks?db=hg19&position=chr20:43299866-43497332&hgsid=443358811_uawFxZ8D0XFx7YCAwxfiOv0gYN64
20	43472105	44602420	64	-0.0372	http://genome.ucsc.edu/cgi-bin/hgTracks?db=hg19&position=chr20:43422105-44652420&hgsid=443358811_uawFxZ8D0XFx7YCAwxfiOv0gYN64
20	44605092	45749744	58	-0.2134	http://genome.ucsc.edu/cgi-bin/hgTracks?db=hg19&position=chr20:44555092-45799744&hgsid=443358811_uawFxZ8D0XFx7YCAwxfiOv0gYN64
20	45772715	62892786	1058	-0.0969	http://genome.ucsc.edu/cgi-bin/hgTracks?db=hg19&position=chr20:45722715-62942786&hgsid=443358811_uawFxZ8D0XFx7YCAwxfiOv0gYN64
21	9421431	11186622	44	-0.2514	http://genome.ucsc.edu/cgi-bin/hgTracks?db=hg19&position=chr21:9371431-11236622&hgsid=443358811_uawFxZ8D0XFx7YCAwxfiOv0gYN64
21	14372868	19693658	124	-0.1131	http://genome.ucsc.edu/cgi-bin/hgTracks?db=hg19&position=chr21:14322868-19743658&hgsid=443358811_uawFxZ8D0XFx7YCAwxfiOv0gYN64
21	19708977	26675572	203	-0.2589	http://genome.ucsc.edu/cgi-bin/hgTracks?db=hg19&position=chr21:19658977-26725572&hgsid=443358811_uawFxZ8D0XFx7YCAwxfiOv0gYN64
21	26700163	31162391	155	-0.0829	http://genome.ucsc.edu/cgi-bin/hgTracks?db=hg19&position=chr21:26650163-31212391&hgsid=443358811_uawFxZ8D0XFx7YCAwxfiOv0gYN64
21	31230218	33234663	84	-0.2243	http://genome.ucsc.edu/cgi-bin/hgTracks?db=hg19&position=chr21:31180218-33284663&hgsid=443358811_uawFxZ8D0XFx7YCAwxfiOv0gYN64
21	33237599	48064866	766	-0.0601	http://genome.ucsc.edu/cgi-bin/hgTracks?db=hg19&position=chr21:33187599-48114866&hgsid=443358811_uawFxZ8D0XFx7YCAwxfiOv0gYN64
22	16926329	28622405	691	-0.0867	http://genome.ucsc.edu/cgi-bin/hgTracks?db=hg19&position=chr22:16876329-28672405&hgsid=443358811_uawFxZ8D0XFx7YCAwxfiOv0gYN64
22	28684514	28698649	4	-0.74	http://genome.ucsc.edu/cgi-bin/hgTracks?db=hg19&position=chr22:28634514-28748649&hgsid=443358811_uawFxZ8D0XFx7YCAwxfiOv0gYN64
22	28743578	51146491	1739	-0.0626	http://genome.ucsc.edu/cgi-bin/hgTracks?db=hg19&position=chr22:28693578-51196491&hgsid=443358811_uawFxZ8D0XFx7YCAwxfiOv0gYN64
23	150326	58003859	1725	-0.0944	http://genome.ucsc.edu/cgi-bin/hgTracks?db=hg19&position=chr23:100326-58053859&hgsid=443358811_uawFxZ8D0XFx7YCAwxfiOv0gYN64
23	62253658	155221007	1500	-0.1107	http://genome.ucsc.edu/cgi-bin/hgTracks?db=hg19&position=chr23:62203658-155271007&hgsid=443358811_uawFxZ8D0XFx7YCAwxfiOv0gYN64
24	7414009	10022029	2	-0.335	http://genome.ucsc.edu/cgi-bin/hgTracks?db=hg19&position=chr24:7364009-10072029&hgsid=443358811_uawFxZ8D0XFx7YCAwxfiOv0gYN64
24	25207542	59026041	3	-0.0067	http://genome.ucsc.edu/cgi-bin/hgTracks?db=hg19&position=chr24:25157542-59076041&hgsid=443358811_uawFxZ8D0XFx7YCAwxfiOv0gYN64

## Sheet: NSUMA Overlap
	HANSEN WGBS				NSUMA TUMOR				NSUMA HCT116
chrom	loc.start	loc.end	num.mark	seg.mean	loc.start.x	loc.end.x	num.mark.x	seg.mean.x	loc.start.y	loc.end.y	num.mark.y	seg.mean.y
1	705685	4065980	2258	-0.0396	532833	4065980	208	-0.2641	532833	4114512	209	-0.0355
1	4155254	5844486	2258	-0.0396	4114512	5844486	48	-0.8386	4155254	5872263	48	-2.0938
1	5972522	14453525	2258	-0.0396	5872263	14453525	834	-0.2683	5972522	14501691	834	-0.1402
1	14537808	14921564	2258	-0.0396	14501691	14968820	29	-0.9611	14537808	14921564	24	-2.0142
1	14936796	14968820	2258	-0.0396	14501691	14968820	29	-0.9611	14936796	15217432	20	-1.1113
1	15026891	15217432	2258	-0.0396	15026891	36992413	1934	-0.2335	14936796	15217432	20	-1.1113
1	15222643	30119748	2258	-0.0396	15026891	36992413	1934	-0.2335	15222643	33976835	1695	-0.0004
1	30390358	31242737	17	-0.2433	15026891	36992413	1934	-0.2335	15222643	33976835	1695	-0.0004
1	31248775	33976835	415	-0.0344	15026891	36992413	1934	-0.2335	15222643	33976835	1695	-0.0004
1	34078374	35057156	415	-0.0344	15026891	36992413	1934	-0.2335	34078374	35057156	27	-1.6522
1	35063231	36977426	415	-0.0344	15026891	36992413	1934	-0.2335	35063231	37190678	207	-0.1588
1	37013494	37190678	8	-0.3192	37006720	37468372	18	-1.0684	35063231	37190678	207	-0.1588
1	37243799	37368399	8	-0.3192	37006720	37468372	18	-1.0684	37243799	37607640	11	-1.9761
1	37440890	37468372	1019	-0.0364	37006720	37468372	18	-1.0684	37243799	37607640	11	-1.9761
1	37476435	37607640	1019	-0.0364	37476435	38504073	64	-0.1401	37243799	37607640	11	-1.9761
1	37862703	38504073	1019	-0.0364	37476435	38504073	64	-0.1401	37862703	38564860	62	0.0161
1	38545683	38564860	1019	-0.0364	38545683	39272603	26	-0.9812	37862703	38564860	62	0.0161
1	38631657	38950596	1019	-0.0364	38545683	39272603	26	-0.9812	38631657	38950596	12	-2.2391
1	38979351	39272603	1019	-0.0364	38545683	39272603	26	-0.9812	38979351	48878383	794	-0.0947
1	39294605	48878383	1019	-0.0364	39294605	55693742	1174	-0.2415	38979351	48878383	794	-0.0947
1	48955360	50813480	1019	-0.0364	39294605	55693742	1174	-0.2415	48955360	50813480	29	-1.7666
1	50861515	55672554	1019	-0.0364	39294605	55693742	1174	-0.2415	50861515	56433461	372	0.0204
1	55689773	55693742	60	-0.1431	39294605	55693742	1174	-0.2415	50861515	56433461	372	0.0204
1	55703766	56433461	60	-0.1431	55703766	58798674	75	-0.8319	50861515	56433461	372	0.0204
1	56437740	56814147	60	-0.1431	55703766	58798674	75	-0.8319	56437740	56814147	12	-1.4074
1	56871926	57082272	60	-0.1431	55703766	58798674	75	-0.8319	56871926	57082272	10	-0.2044
1	57087920	58798674	60	-0.1431	55703766	58798674	75	-0.8319	57087920	58897154	46	-1.9301
1	58862661	58897154	60	-0.1431	58862661	62654580	134	-0.1505	57087920	58897154	46	-1.9301
1	58916350	59110776	60	-0.1431	58862661	62654580	134	-0.1505	58916350	69377756	448	-0.0308
1	59141809	62654580	145	-0.01	58862661	62654580	134	-0.1505	58916350	69377756	448	-0.0308
1	62655429	62882752	145	-0.01	62655429	62882752	24	-0.8065	58916350	69377756	448	-0.0308
1	62893684	63141172	145	-0.01	62893684	63312772	36	0.0723	58916350	69377756	448	-0.0308
1	63149334	63312772	53	-0.1523	62893684	63312772	36	0.0723	58916350	69377756	448	-0.0308
1	63336469	63761688	53	-0.1523	63336469	63761688	24	-1.0451	58916350	69377756	448	-0.0308
1	63766223	64575271	53	-0.1523	63766223	68705111	211	-0.2412	58916350	69377756	448	-0.0308
1	64703805	68705111	144	-0.049	63766223	68705111	211	-0.2412	58916350	69377756	448	-0.0308
1	68707898	68807805	144	-0.049	68707898	78016786	240	-0.7506	58916350	69377756	448	-0.0308
1	68820805	69377756	24	-0.175	68707898	78016786	240	-0.7506	58916350	69377756	448	-0.0308
1	69573474	70472079	24	-0.175	68707898	78016786	240	-0.7506	69573474	70472079	24	-1.3506
1	70482882	70598137	24	-0.175	68707898	78016786	240	-0.7506	70482882	70989392	32	0.0651
1	70598905	70942894	35	-0.009	68707898	78016786	240	-0.7506	70482882	70989392	32	0.0651
1	70955538	70989392	106	-0.1509	68707898	78016786	240	-0.7506	70482882	70989392	32	0.0651
1	71011367	75665688	106	-0.1509	68707898	78016786	240	-0.7506	71011367	75665688	100	-1.9497
1	75667159	78015633	106	-0.1509	68707898	78016786	240	-0.7506	75667159	80216940	144	-0.2101
1	78027211	78719256	60	-0.0184	78020383	78719256	55	-0.1529	75667159	80216940	144	-0.2101
1	78766215	79396133	60	-0.0184	78766215	83907777	119	-0.7233	75667159	80216940	144	-0.2101
1	79464045	80216940	99	-0.1953	78766215	83907777	119	-0.7233	75667159	80216940	144	-0.2101
1	80246724	83907777	99	-0.1953	78766215	83907777	119	-0.7233	80246724	84292419	105	-1.3481
1	83909123	84292419	99	-0.1953	83909123	84528830	17	-1.4004	80246724	84292419	105	-1.3481
1	84337504	84528830	99	-0.1953	83909123	84528830	17	-1.4004	84337504	90542566	211	0.0311
1	84714489	90542566	524	-0.0511	84714489	97448408	498	-0.3344	84337504	90542566	211	0.0311
1	90552177	91158538	524	-0.0511	84714489	97448408	498	-0.3344	90552177	91158538	16	-1.7206
1	91229514	97448408	524	-0.0511	84714489	97448408	498	-0.3344	91229514	101759890	405	0.0135
1	97599479	101570540	524	-0.0511	97599479	108721360	293	-0.7252	91229514	101759890	405	0.0135
1	101642090	101759890	148	-0.1675	97599479	108721360	293	-0.7252	91229514	101759890	405	0.0135
1	101762377	108539811	148	-0.1675	97599479	108721360	293	-0.7252	101762377	108539811	163	-1.6804
1	108849480	109246167	148	-0.1675	108849480	121182415	522	-0.1918	108721360	111055718	138	-0.0288
1	109282941	111055718	388	-0.0405	108849480	121182415	522	-0.1918	108721360	111055718	138	-0.0288
1	111184970	111522443	388	-0.0405	108849480	121182415	522	-0.1918	111184970	111522443	12	-1.4902
1	111553360	112302520	388	-0.0405	108849480	121182415	522	-0.1918	111553360	112302520	36	0.0033
1	112492625	112733370	388	-0.0405	108849480	121182415	522	-0.1918	112492625	112733370	6	-2.0873
1	112908447	118704253	388	-0.0405	108849480	121182415	522	-0.1918	112908447	118704253	273	-0.1156
1	118708361	119515314	388	-0.0405	108849480	121182415	522	-0.1918	118708361	119515314	11	-2.3725
1	119558886	121159262	388	-0.0405	108849480	121182415	522	-0.1918	119558886	121182415	47	-0.2315
1	142646941	143472733	1757	-0.042	142582362	154598404	676	-0.3448	142582362	143472733	28	-1.9421
1	143666300	151862475	1757	-0.042	142582362	154598404	676	-0.3448	143666300	151862475	441	-0.11
1	151865772	153425454	1757	-0.042	142582362	154598404	676	-0.3448	151865772	153425454	41	-1.3947
1	153461892	154598404	1757	-0.042	142582362	154598404	676	-0.3448	153461892	157145465	459	0.0236
1	154603413	154798448	1757	-0.042	154603413	154798448	14	-1.2266	153461892	157145465	459	0.0236
1	154823547	157145465	1757	-0.042	154823547	175348239	1001	-0.4124	153461892	157145465	459	0.0236
1	157199679	157931383	1757	-0.042	154823547	175348239	1001	-0.4124	157199679	157931383	21	-2.0088
1	157960249	158103414	1757	-0.042	154823547	175348239	1001	-0.4124	157960249	158103414	8	0.5703
1	158136836	159491714	1757	-0.042	154823547	175348239	1001	-0.4124	158136836	159491714	50	-2.223
1	159525625	166232490	1757	-0.042	154823547	175348239	1001	-0.4124	159525625	166232490	294	-0.2954
1	166287623	166751898	1757	-0.042	154823547	175348239	1001	-0.4124	166287623	166751898	13	-2.2488
1	166793683	175348239	1757	-0.042	154823547	175348239	1001	-0.4124	166793683	175705581	344	-0.1153
1	175349631	175705581	1757	-0.042	175349631	175859609	12	-1.3996	166793683	175705581	344	-0.1153
1	175743564	175806740	1757	-0.042	175349631	175859609	12	-1.3996	175743564	175806740	3	-3.9905
1	175876196	176173988	1757	-0.042	175876196	176173988	17	0.027	175859609	176190044	19	0.0501
1	176205545	177165678	1757	-0.042	176190044	177165678	26	-1.4814	176205545	177594541	31	-1.9808
1	177210200	177594541	1757	-0.042	177210200	214928645	1531	-0.5101	176205545	177594541	31	-1.9808
1	177798276	181504916	1757	-0.042	177210200	214928645	1531	-0.5101	177798276	181504916	198	-0.0831
1	181584419	181764669	1757	-0.042	177210200	214928645	1531	-0.5101	181584419	181764669	3	-2.6545
1	181829360	186341403	1757	-0.042	177210200	214928645	1531	-0.5101	181829360	208116112	1017	0.0325
1	186358928	190538833	122	-0.2037	177210200	214928645	1531	-0.5101	181829360	208116112	1017	0.0325
1	190567163	199936936	237	-0.1195	177210200	214928645	1531	-0.5101	181829360	208116112	1017	0.0325
1	199937608	208116112	2146	-0.0556	177210200	214928645	1531	-0.5101	181829360	208116112	1017	0.0325
1	208162721	209330055	2146	-0.0556	177210200	214928645	1531	-0.5101	208162721	209330055	34	-1.948
1	209367816	210583489	2146	-0.0556	177210200	214928645	1531	-0.5101	209367816	210583489	39	-0.7916
1	210624355	211325141	2146	-0.0556	177210200	214928645	1531	-0.5101	210624355	211325141	28	-1.9172
1	211363870	213483120	2146	-0.0556	177210200	214928645	1531	-0.5101	211363870	213483120	166	-0.0429
1	213492580	214122430	2146	-0.0556	177210200	214928645	1531	-0.5101	213492580	214122430	13	-1.3264
1	214357451	214928645	2146	-0.0556	177210200	214928645	1531	-0.5101	214357451	215866288	44	0.1801
1	214953959	215377305	2146	-0.0556	214953959	215377305	6	-1.8193	214357451	215866288	44	0.1801
1	215386878	215866288	2146	-0.0556	215386878	216384247	23	-0.3834	214357451	215866288	44	0.1801
1	215867839	216384247	2146	-0.0556	215386878	216384247	23	-0.3834	215867839	217497033	40	-1.7381
1	216543189	217497033	2146	-0.0556	216543189	217588881	30	-1.3657	215867839	217497033	40	-1.7381
1	217585904	217588881	2146	-0.0556	216543189	217588881	30	-1.3657	217585904	226262771	397	-0.0815
1	217631496	226262771	2146	-0.0556	217631496	233922135	794	-0.4256	217585904	226262771	397	-0.0815
1	226263915	226265351	2146	-0.0556	217631496	233922135	794	-0.4256	226263915	226265351	3	3.2387
1	226267133	233922135	2146	-0.0556	217631496	233922135	794	-0.4256	226267133	237109139	643	-0.0774
1	233969799	234525339	2146	-0.0556	233969799	234525339	23	-1.3151	226267133	237109139	643	-0.0774
1	234528549	236768607	2146	-0.0556	234528549	236768607	203	-0.3549	226267133	237109139	643	-0.0774
1	236777020	237109139	2146	-0.0556	236777020	239334825	115	-0.9331	226267133	237109139	643	-0.0774
1	237122879	239334825	2146	-0.0556	236777020	239334825	115	-0.9331	237122879	241547738	235	-1.961
1	239340935	240111914	2146	-0.0556	239340935	240111914	46	0	237122879	241547738	235	-1.961
1	240168672	240856176	2146	-0.0556	240168672	240856176	55	-1.236	237122879	241547738	235	-1.961
1	240864598	241547738	2146	-0.0556	240864598	242184252	90	-0.5111	237122879	241547738	235	-1.961
1	241552423	242184252	2146	-0.0556	240864598	242184252	90	-0.5111	241552423	242203578	56	-0.3176
1	242186858	242203578	2146	-0.0556	242186858	242986189	53	-1.0627	241552423	242203578	56	-0.3176
1	242204200	242986189	2146	-0.0556	242186858	242986189	53	-1.0627	242204200	243239429	65	-1.714
1	243022875	243239429	2146	-0.0556	243022875	243642184	45	-0.3493	242204200	243239429	65	-1.714
1	243254435	243642184	2146	-0.0556	243022875	243642184	45	-0.3493	243254435	243672060	28	-0.2001
1	243679203	244195618	2146	-0.0556	243672060	244195618	24	-1.3956	243679203	244195618	23	-1.9738
1	244242867	247349849	2146	-0.0556	244242867	247349849	254	-0.319	244242867	247581696	272	-0.2451
1	247389814	247542476	2146	-0.0556	247389814	249237754	63	-0.9092	244242867	247581696	272	-0.2451
1	247562254	247581696	46	-0.1533	247389814	249237754	63	-0.9092	244242867	247581696	272	-0.2451
1	247582549	249090969	46	-0.1533	247389814	249237754	63	-0.9092	247582549	249090969	38	-1.8952
1	249112471	249129826	46	-0.1533	247389814	249237754	63	-0.9092	249112471	249237754	7	0.0217
1	249133550	249177775	7	0.031	247389814	249237754	63	-0.9092	249112471	249237754	7	0.0217
2	38125	3140386	47	-0.138	38125	3766768	75	-0.5669	38125	3927926	77	-0.7067
2	3171458	3622267	25	0.0068	38125	3766768	75	-0.5669	38125	3927926	77	-0.7067
2	3624355	3766768	85	-0.1948	38125	3766768	75	-0.5669	38125	3927926	77	-0.7067
2	3884376	3927926	85	-0.1948	3884376	6297383	67	-1.1714	38125	3927926	77	-0.7067
2	3952845	6297383	85	-0.1948	3884376	6297383	67	-1.1714	3952845	7931516	105	-1.9427
2	6340038	7820335	85	-0.1948	6340038	21023504	531	-0.4344	3952845	7931516	105	-1.9427
2	7846360	7931516	229	-0.0199	6340038	21023504	531	-0.4344	3952845	7931516	105	-1.9427
2	7980806	11607537	229	-0.0199	6340038	21023504	531	-0.4344	7980806	13002186	294	-0.0582
2	11624606	11636982	3	-0.4067	6340038	21023504	531	-0.4344	7980806	13002186	294	-0.0582
2	11645687	13002186	59	-0.1347	6340038	21023504	531	-0.4344	7980806	13002186	294	-0.0582
2	13014526	13901269	59	-0.1347	6340038	21023504	531	-0.4344	13014526	15042348	43	-1.7481
2	13916956	14380566	9	-0.3274	6340038	21023504	531	-0.4344	13014526	15042348	43	-1.7481
2	14498581	15042348	182	-0.0742	6340038	21023504	531	-0.4344	13014526	15042348	43	-1.7481
2	15045097	16447965	182	-0.0742	6340038	21023504	531	-0.4344	15045097	16447965	46	-0.5659
2	16465573	17475436	182	-0.0742	6340038	21023504	531	-0.4344	16465573	17475436	16	-2.1178
2	17507380	18080417	182	-0.0742	6340038	21023504	531	-0.4344	17507380	18080417	16	-0.0824
2	18139210	19521306	182	-0.0742	6340038	21023504	531	-0.4344	18139210	19521306	27	-1.1414
2	19664012	21023504	182	-0.0742	6340038	21023504	531	-0.4344	19664012	21207837	54	-0.0728
2	21033721	21051854	182	-0.0742	21033721	23026190	55	-1.0543	19664012	21207837	54	-0.0728
2	21055239	21207837	49	-0.1787	21033721	23026190	55	-1.0543	19664012	21207837	54	-0.0728
2	21239780	23026190	49	-0.1787	21033721	23026190	55	-1.0543	21239780	23481647	58	-2.1218
2	23061989	23481647	49	-0.1787	23061989	29418525	507	-0.299	21239780	23481647	58	-2.1218
2	23535645	23614303	49	-0.1787	23061989	29418525	507	-0.299	23535645	29433391	501	-0.0323
2	23623419	29418525	739	-0.0372	23061989	29418525	507	-0.299	23535645	29433391	501	-0.0323
2	29432332	29433391	739	-0.0372	29432332	30434433	33	-1.0897	23535645	29433391	501	-0.0323
2	29525308	30318997	739	-0.0372	29432332	30434433	33	-1.0897	29525308	30318997	24	-1.673
2	30329019	30434433	739	-0.0372	29432332	30434433	33	-1.0897	30329019	30898086	40	-0.1617
2	30437340	30898086	739	-0.0372	30437340	33825509	223	-0.3166	30329019	30898086	40	-0.1617
2	30983041	32017050	739	-0.0372	30437340	33825509	223	-0.3166	30983041	32017050	21	-1.5565
2	32062715	33825509	739	-0.0372	30437340	33825509	223	-0.3166	32062715	34012779	182	-0.1787
2	33830999	34012779	739	-0.0372	33830999	36569535	101	-1.0788	32062715	34012779	182	-0.1787
2	34026979	34241422	739	-0.0372	33830999	36569535	101	-1.0788	34026979	36446927	86	-1.9816
2	34246476	36356535	47	-0.1367	33830999	36569535	101	-1.0788	34026979	36446927	86	-1.9816
2	36373686	36446927	227	-0.0206	33830999	36569535	101	-1.0788	34026979	36446927	86	-1.9816
2	36560274	36569535	227	-0.0206	33830999	36569535	101	-1.0788	36560274	40068340	214	0.0135
2	36794829	39834457	227	-0.0206	36794829	39834457	204	-0.2591	36560274	40068340	214	0.0135
2	39873882	40068340	227	-0.0206	39873882	42051799	40	-1.0321	36560274	40068340	214	0.0135
2	40075513	40361324	227	-0.0206	39873882	42051799	40	-1.0321	40075513	40361324	6	-2.3733
2	40439517	40975446	227	-0.0206	39873882	42051799	40	-1.0321	40439517	41092944	10	-0.5286
2	41033221	41092944	19	-0.22	39873882	42051799	40	-1.0321	40439517	41092944	10	-0.5286
2	41526979	42051799	19	-0.22	39873882	42051799	40	-1.0321	41526979	42079731	17	-2.4849
2	42099046	48780719	1477	-0.056	42079731	48780719	380	-0.2898	42089674	48826135	383	-0.0637
2	48785286	48826135	1477	-0.056	48785286	53871754	127	-0.7505	42089674	48826135	383	-0.0637
2	48834845	50661290	1477	-0.056	48785286	53871754	127	-0.7505	48834845	50661290	44	-1.6288
2	50708996	53871754	1477	-0.056	48785286	53871754	127	-0.7505	50708996	58819150	269	0.061
2	53971445	56030591	1477	-0.056	53971445	56030591	119	-0.2094	50708996	58819150	269	0.061
2	56051504	58819150	1477	-0.056	56051504	59695431	87	-0.9856	50708996	58819150	269	0.061
2	58952996	59695431	1477	-0.056	56051504	59695431	87	-0.9856	58952996	60931250	52	-1.232
2	59758800	60656461	1477	-0.056	59758800	60656461	22	-0.0627	58952996	60931250	52	-1.232
2	60676576	60910791	1477	-0.056	60676576	60910791	12	-1.3051	58952996	60931250	52	-1.232
2	60915376	60931250	1477	-0.056	60915376	65903907	373	-0.2461	58952996	60931250	52	-1.232
2	60937115	65903907	1477	-0.056	60915376	65903907	373	-0.2461	60937115	65903907	371	-0.0928
2	65967794	66747537	1477	-0.056	65967794	66747537	22	-1.1086	65967794	68254069	51	-1.8671
2	66766112	68254069	1477	-0.056	66766112	75864113	442	-0.3283	65967794	68254069	51	-1.8671
2	68271764	75238476	1477	-0.056	66766112	75864113	442	-0.3283	68271764	75238476	407	-0.0144
2	75364570	75864113	193	-0.1456	66766112	75864113	442	-0.3283	75352402	80902459	148	-1.9231
2	75935730	80902459	193	-0.1456	75935730	84054713	233	-1.0614	75352402	80902459	148	-1.9231
2	80947288	81211889	193	-0.1456	75935730	84054713	233	-1.0614	80947288	81211889	9	-0.8523
2	81308349	84054713	193	-0.1456	75935730	84054713	233	-1.0614	81308349	89130472	354	0.0157
2	84072630	84802734	193	-0.1456	84072630	92242661	316	-0.434	81308349	89130472	354	0.0157
2	84853723	88305665	167	-0.0516	84072630	92242661	316	-0.434	81308349	89130472	354	0.0157
2	88311248	89130472	75	-0.1193	84072630	92242661	316	-0.434	81308349	89130472	354	0.0157
2	89162582	92199980	75	-0.1193	84072630	92242661	316	-0.434	89162582	92242661	44	-1.1534
2	95528604	95744589	9	-0.2419	95338540	100123311	248	-0.2337	95338540	100137213	250	-0.065
2	95780000	100123311	191	-0.0312	95338540	100123311	248	-0.2337	95338540	100137213	250	-0.065
2	100131436	100137213	191	-0.0312	100131436	101167292	48	-1.1744	95338540	100137213	250	-0.065
2	100159392	100197075	191	-0.0312	100131436	101167292	48	-1.1744	100159392	100748014	29	-1.869
2	100200149	100748014	35	-0.2243	100131436	101167292	48	-1.1744	100159392	100748014	29	-1.869
2	100781771	101122802	35	-0.2243	100131436	101167292	48	-1.1744	100781771	103572594	170	-0.0449
2	101153841	101167292	108	-0.0331	100131436	101167292	48	-1.1744	100781771	103572594	170	-0.0449
2	101170046	102829353	108	-0.0331	101170046	102829353	125	-0.2463	100781771	103572594	170	-0.0449
2	102881216	102991162	108	-0.0331	102881216	102991162	7	-1.5389	100781771	103572594	170	-0.0449
2	103026904	103398483	108	-0.0331	103026904	103438371	19	-0.063	100781771	103572594	170	-0.0449
2	103588939	104324516	46	-0.2022	103482848	104324516	34	-1.1222	103574332	105402189	64	-1.8616
2	104382852	105402189	46	-0.2022	104382852	107414906	114	-0.4346	103574332	105402189	64	-1.8616
2	105536565	105550405	46	-0.2022	104382852	107414906	114	-0.4346	105536565	107259688	79	-0.2031
2	105555396	107259688	319	-0.0454	104382852	107414906	114	-0.4346	105536565	107259688	79	-0.2031
2	107378994	107414906	319	-0.0454	104382852	107414906	114	-0.4346	107378994	108913000	43	-1.6539
2	107489150	108398055	319	-0.0454	107489150	108398055	24	-0.9964	107378994	108913000	43	-1.6539
2	108409602	108913000	319	-0.0454	108409602	111439107	117	-0.2215	107378994	108913000	43	-1.6539
2	108917961	111439107	319	-0.0454	108409602	111439107	117	-0.2215	108917961	114750600	269	-0.0534
2	111513796	111734887	319	-0.0454	111513796	111734887	8	-1.4549	108917961	114750600	269	-0.0534
2	111738859	114750600	319	-0.0454	111738859	129006147	692	-0.4799	108917961	114750600	269	-0.0534
2	114768844	115419530	319	-0.0454	111738859	129006147	692	-0.4799	114768844	118470695	104	-1.918
2	115471286	118470695	77	-0.1554	111738859	129006147	692	-0.4799	114768844	118470695	104	-1.918
2	118535048	119748831	77	-0.1554	111738859	129006147	692	-0.4799	118535048	122598350	171	-0.1294
2	119884716	121462826	86	-0.0377	111738859	129006147	692	-0.4799	118535048	122598350	171	-0.1294
2	121465969	121780748	8	-0.2242	111738859	129006147	692	-0.4799	118535048	122598350	171	-0.1294
2	121806006	122598350	73	-0.0342	111738859	129006147	692	-0.4799	118535048	122598350	171	-0.1294
2	122607551	122824905	73	-0.0342	111738859	129006147	692	-0.4799	122607551	127553999	133	-1.7786
2	122832714	125287607	50	-0.1708	111738859	129006147	692	-0.4799	122607551	127553999	133	-1.7786
2	125326341	127553999	282	-0.0715	111738859	129006147	692	-0.4799	122607551	127553999	133	-1.7786
2	127562631	129006147	282	-0.0715	111738859	129006147	692	-0.4799	127562631	129414512	141	-0.2069
2	129022086	129414512	282	-0.0715	129022086	130624931	59	-1.1405	127562631	129414512	141	-0.2069
2	129428452	130511476	282	-0.0715	129022086	130624931	59	-1.1405	129428452	130511476	38	-1.798
2	130518107	130624931	282	-0.0715	129022086	130624931	59	-1.1405	130518107	133420939	146	-0.4175
2	130632170	132272419	282	-0.0715	130632170	145322332	538	-0.6045	130518107	133420939	146	-0.4175
2	132284658	133420939	87	-0.1315	130632170	145322332	538	-0.6045	130518107	133420939	146	-0.4175
2	133456331	134120418	87	-0.1315	130632170	145322332	538	-0.6045	133456331	134120418	28	-2.182
2	134230827	135798909	87	-0.1315	130632170	145322332	538	-0.6045	134230827	137173802	167	-0.2814
2	135808785	136888894	92	-0.0116	130632170	145322332	538	-0.6045	134230827	137173802	167	-0.2814
2	136892419	137173802	192	-0.1637	130632170	145322332	538	-0.6045	134230827	137173802	167	-0.2814
2	137343026	138552075	192	-0.1637	130632170	145322332	538	-0.6045	137343026	138552075	25	-1.8468
2	138576772	143885175	192	-0.1637	130632170	145322332	538	-0.6045	138576772	143885175	135	0.2355
2	143892296	144075660	192	-0.1637	130632170	145322332	538	-0.6045	143892296	144075660	6	-2.5588
2	144081386	145322332	192	-0.1637	130632170	145322332	538	-0.6045	144081386	163232968	555	0.0755
2	145347364	147753826	192	-0.1637	145347364	147753826	58	-1.4027	144081386	163232968	555	0.0755
2	147794497	147977205	192	-0.1637	147794497	153695166	204	-0.3682	144081386	163232968	555	0.0755
2	148012368	153610214	181	-0.0403	147794497	153695166	204	-0.3682	144081386	163232968	555	0.0755
2	153677969	153695166	45	-0.2293	147794497	153695166	204	-0.3682	144081386	163232968	555	0.0755
2	153714838	156431950	45	-0.2293	153714838	156501759	60	-1.1589	144081386	163232968	555	0.0755
2	156463519	156501759	185	-0.0485	153714838	156501759	60	-1.1589	144081386	163232968	555	0.0755
2	156518192	162139176	185	-0.0485	156518192	181925942	937	-0.446	144081386	163232968	555	0.0755
2	162149929	163232968	129	-0.1559	156518192	181925942	937	-0.446	144081386	163232968	555	0.0755
2	163316528	165389835	129	-0.1559	156518192	181925942	937	-0.446	163316528	165389835	56	-1.4612
2	165426711	165859946	129	-0.1559	156518192	181925942	937	-0.446	165426711	165859946	16	0.1903
2	165869193	166471977	129	-0.1559	156518192	181925942	937	-0.446	165869193	166471977	18	-1.1757
2	166508258	166817966	129	-0.1559	156518192	181925942	937	-0.446	166508258	166817966	7	0.2678
2	166821959	168227193	129	-0.1559	156518192	181925942	937	-0.446	166821959	168631100	43	-1.6222
2	168282784	168631100	586	-0.0667	156518192	181925942	937	-0.446	166821959	168631100	43	-1.6222
2	168660592	177507269	586	-0.0667	156518192	181925942	937	-0.446	168660592	177507269	457	-0.0091
2	177530435	177918215	586	-0.0667	156518192	181925942	937	-0.446	177530435	177918215	12	-2.1378
2	177920044	181925942	586	-0.0667	156518192	181925942	937	-0.446	177920044	198611548	666	0.0544
2	181961123	182353378	586	-0.0667	181961123	182353378	10	-1.8242	177920044	198611548	666	0.0544
2	182466213	184965103	586	-0.0667	182466213	184965103	85	-0.5413	177920044	198611548	666	0.0544
2	184997318	186003694	586	-0.0667	184997318	186003694	17	-1.2307	177920044	198611548	666	0.0544
2	186081603	187510414	586	-0.0667	186081603	187735529	40	-0.3437	177920044	198611548	666	0.0544
2	187562029	187735529	64	-0.2018	186081603	187735529	40	-0.3437	177920044	198611548	666	0.0544
2	187760581	190052415	64	-0.2018	187760581	190160265	80	-0.9965	177920044	198611548	666	0.0544
2	190229131	192432566	72	-0.0375	190202001	207135386	828	-0.2972	177920044	198611548	666	0.0544
2	192452084	195971465	66	-0.1497	190202001	207135386	828	-0.2972	177920044	198611548	666	0.0544
2	196151242	198611548	673	-0.0384	190202001	207135386	828	-0.2972	177920044	198611548	666	0.0544
2	198701095	199927065	673	-0.0384	190202001	207135386	828	-0.2972	198701095	199927065	21	-1.4209
2	199969457	204851706	673	-0.0384	190202001	207135386	828	-0.2972	199969457	204851706	392	-0.0111
2	204855125	206707180	673	-0.0384	190202001	207135386	828	-0.2972	204855125	206707180	59	-1.0717
2	206726480	207135386	673	-0.0384	190202001	207135386	828	-0.2972	206726480	209293734	154	0.0291
2	207177231	208294693	673	-0.0384	207177231	208294693	27	-1.1578	206726480	209293734	154	0.0291
2	208305450	209178306	673	-0.0384	208305450	228712503	912	-0.5516	206726480	209293734	154	0.0291
2	209186290	209293734	256	-0.1223	208305450	228712503	912	-0.5516	206726480	209293734	154	0.0291
2	209295364	210112605	256	-0.1223	208305450	228712503	912	-0.5516	209295364	210112605	21	-1.3519
2	210124880	217650232	256	-0.1223	208305450	228712503	912	-0.5516	210124880	217650232	284	0.0379
2	217676239	218506089	256	-0.1223	208305450	228712503	912	-0.5516	217676239	218506089	16	-1.8276
2	218516054	219022484	256	-0.1223	208305450	228712503	912	-0.5516	218516054	221833996	195	0.0708
2	219079516	219808627	72	-0.0191	208305450	228712503	912	-0.5516	218516054	221833996	195	0.0708
2	219811182	221833996	88	-0.153	208305450	228712503	912	-0.5516	218516054	221833996	195	0.0708
2	221837593	223143679	88	-0.153	208305450	228712503	912	-0.5516	221837593	223417503	55	-1.0656
2	223150663	223417503	124	-0.0529	208305450	228712503	912	-0.5516	221837593	223417503	55	-1.0656
2	223468861	225645337	124	-0.0529	208305450	228712503	912	-0.5516	223468861	229577670	290	0.0439
2	225723094	228176097	59	-0.1468	208305450	228712503	912	-0.5516	223468861	229577670	290	0.0439
2	228227854	228712503	50	0.0017	208305450	228712503	912	-0.5516	223468861	229577670	290	0.0439
2	228862718	229577670	26	-0.2064	228801572	229840917	30	-1.2263	223468861	229577670	290	0.0439
2	229619597	229840917	26	-0.2064	228801572	229840917	30	-1.2263	229619597	229977294	9	-1.9267
2	229937228	229977294	26	-0.2064	229937228	243062779	689	-0.2735	229619597	229977294	9	-1.9267
2	229996039	230509051	26	-0.2064	229937228	243062779	689	-0.2735	229996039	237283426	431	0.0122
2	230562624	237283426	698	-0.0411	229937228	243062779	689	-0.2735	229996039	237283426	431	0.0122
2	237315481	237887100	698	-0.0411	229937228	243062779	689	-0.2735	237315481	237887100	23	-2.1411
2	237917204	243016749	698	-0.0411	229937228	243062779	689	-0.2735	237917204	243062779	232	-0.0806
3	129284	3153827	115	-0.1629	81317	3153827	105	-0.9026	81317	3741000	120	-1.846
3	3163386	3741000	115	-0.1629	3163386	4629050	28	-0.1206	81317	3741000	120	-1.846
3	3995022	4629050	115	-0.1629	3163386	4629050	28	-0.1206	3995022	6394644	80	-0.1009
3	4664102	4667333	632	-0.0494	4657153	4667333	4	-2.2304	3995022	6394644	80	-0.1009
3	4674715	6298012	632	-0.0494	4674715	6298012	59	-0.4125	3995022	6394644	80	-0.1009
3	6337139	6394644	632	-0.0494	6337139	8499437	69	-0.9054	3995022	6394644	80	-0.1009
3	6497246	7294468	632	-0.0494	6337139	8499437	69	-0.9054	6497246	7294468	34	-1.7938
3	7313170	8499437	632	-0.0494	6337139	8499437	69	-0.9054	7313170	18427039	536	-0.0407
3	8505356	18427039	632	-0.0494	8505356	20253077	549	-0.2606	7313170	18427039	536	-0.0407
3	18578661	18774471	632	-0.0494	8505356	20253077	549	-0.2606	18578661	18774471	5	-2.5368
3	18839798	19340338	632	-0.0494	8505356	20253077	549	-0.2606	18839798	19340338	12	-1.2828
3	19364865	19763520	632	-0.0494	8505356	20253077	549	-0.2606	19364865	19763520	4	-2.6264
3	19911365	20253077	632	-0.0494	8505356	20253077	549	-0.2606	19911365	20338892	24	0.1723
3	20577752	23239633	269	-0.1224	20338892	23445239	56	-1.0241	20481202	23239633	53	-2.0492
3	23300308	23445239	269	-0.1224	20338892	23445239	56	-1.0241	23300308	24920844	59	-0.3159
3	23482954	24920844	269	-0.1224	23482954	90281211	2862	-0.3878	23300308	24920844	59	-0.3159
3	25031383	25411337	269	-0.1224	23482954	90281211	2862	-0.3878	25031383	25411337	9	-2.3071
3	25443360	25934611	269	-0.1224	23482954	90281211	2862	-0.3878	25443360	25934611	22	-0.438
3	25939988	27235709	269	-0.1224	23482954	90281211	2862	-0.3878	25939988	27235709	26	-1.5092
3	27325801	30103373	269	-0.1224	23482954	90281211	2862	-0.3878	27325801	34039060	320	-0.1684
3	30121979	34039060	1063	-0.0346	23482954	90281211	2862	-0.3878	27325801	34039060	320	-0.1684
3	34051972	36680501	1063	-0.0346	23482954	90281211	2862	-0.3878	34051972	36680501	37	-2.0475
3	36791664	50399681	1063	-0.0346	23482954	90281211	2862	-0.3878	36791664	54044080	1147	-0.1132
3	50466902	51217360	20	-0.2113	23482954	90281211	2862	-0.3878	36791664	54044080	1147	-0.1132
3	51304805	53886162	178	-0.0151	23482954	90281211	2862	-0.3878	36791664	54044080	1147	-0.1132
3	53900144	54044080	65	-0.145	23482954	90281211	2862	-0.3878	36791664	54044080	1147	-0.1132
3	54055679	56544069	65	-0.145	23482954	90281211	2862	-0.3878	54055679	56544069	73	-2.1051
3	56585653	59113863	452	-0.0258	23482954	90281211	2862	-0.3878	56585653	59113863	215	0.0159
3	59125441	60023532	452	-0.0258	23482954	90281211	2862	-0.3878	59125441	60023532	24	-1.2943
3	60086034	62311623	452	-0.0258	23482954	90281211	2862	-0.3878	60086034	62311623	79	-0.0464
3	62370088	63736356	452	-0.0258	23482954	90281211	2862	-0.3878	62370088	63736356	27	-1.6545
3	63793457	64114346	452	-0.0258	23482954	90281211	2862	-0.3878	63793457	64114346	19	-0.2862
3	64132343	65291177	452	-0.0258	23482954	90281211	2862	-0.3878	64132343	65291177	32	-1.8987
3	65360956	66829541	452	-0.0258	23482954	90281211	2862	-0.3878	65360956	66829541	67	-0.0671
3	66849678	67250878	452	-0.0258	23482954	90281211	2862	-0.3878	66849678	67250878	18	-1.4782
3	67365621	67755788	452	-0.0258	23482954	90281211	2862	-0.3878	67365621	67755788	12	-0.1586
3	67796450	68341476	452	-0.0258	23482954	90281211	2862	-0.3878	67796450	68946701	23	-2.1161
3	68352591	68946701	14	-0.2548	23482954	90281211	2862	-0.3878	67796450	68946701	23	-2.1161
3	69076239	69392823	239	-0.0558	23482954	90281211	2862	-0.3878	69076239	69392823	22	-0.404
3	69438277	71608046	239	-0.0558	23482954	90281211	2862	-0.3878	69438277	71608046	75	-1.7835
3	71614175	73185133	239	-0.0558	23482954	90281211	2862	-0.3878	71614175	73185133	83	-0.2978
3	73195830	73356601	239	-0.0558	23482954	90281211	2862	-0.3878	73195830	81433739	257	-1.8768
3	73401415	81433739	387	-0.1427	23482954	90281211	2862	-0.3878	73195830	81433739	257	-1.8768
3	81464606	82425982	387	-0.1427	23482954	90281211	2862	-0.3878	81464606	82425982	24	-0.4198
3	82430517	86998901	387	-0.1427	23482954	90281211	2862	-0.3878	82430517	86998901	117	-2.0684
3	87005859	88322778	387	-0.1427	23482954	90281211	2862	-0.3878	87005859	88322778	40	-0.2223
3	88328676	90281211	387	-0.1427	23482954	90281211	2862	-0.3878	88328676	90281211	37	-1.9376
3	93530026	93987243	221	-0.0756	93530026	97495593	101	-0.754	93530026	93987243	21	0.1197
3	94048337	97495593	221	-0.0756	93530026	97495593	101	-0.754	94048337	97495593	80	-1.919
3	97676264	98567937	221	-0.0756	97676264	101972295	133	-0.3152	97676264	98567937	23	-0.3495
3	98598323	99488687	221	-0.0756	97676264	101972295	133	-0.3152	98598323	99488687	11	-1.7711
3	99559160	101972295	221	-0.0756	97676264	101972295	133	-0.3152	99559160	115928691	558	-0.0064
3	101981567	101982192	221	-0.0756	101981567	105043548	66	-0.8118	99559160	115928691	558	-0.0064
3	101995951	104655787	53	-0.1874	101981567	105043548	66	-0.8118	99559160	115928691	558	-0.0064
3	104661545	105043548	1248	-0.055	101981567	105043548	66	-0.8118	99559160	115928691	558	-0.0064
3	105061581	106273350	1248	-0.055	105061581	106273350	45	-0.2752	99559160	115928691	558	-0.0064
3	106307520	106964057	1248	-0.055	106307520	106964057	27	-1.0949	99559160	115928691	558	-0.0064
3	107000570	115928691	1248	-0.055	107000570	134271138	1002	-0.3564	99559160	115928691	558	-0.0064
3	115941675	117895863	1248	-0.055	107000570	134271138	1002	-0.3564	115941675	117895863	37	-2.2879
3	118034480	123636266	1248	-0.055	107000570	134271138	1002	-0.3564	118034480	123636266	211	-0.0834
3	123686842	124075273	1248	-0.055	107000570	134271138	1002	-0.3564	123686842	124075273	13	-1.8839
3	124228148	134271138	1248	-0.055	107000570	134271138	1002	-0.3564	124228148	137142255	539	-0.2115
3	134300610	135773193	1248	-0.055	134300610	135773193	27	-1.0239	124228148	137142255	539	-0.2115
3	135780686	136770715	1248	-0.055	135780686	136770715	90	-0.0329	124228148	137142255	539	-0.2115
3	136839954	137142255	1248	-0.055	136839954	137846340	20	-1.0276	124228148	137142255	539	-0.2115
3	137171862	137666536	1248	-0.055	136839954	137846340	20	-1.0276	137171862	137666536	11	-2.0234
3	137670426	137846340	1248	-0.055	136839954	137846340	20	-1.0276	137670426	139489173	111	-0.021
3	137868566	139489173	1248	-0.055	137868566	156918284	761	-0.4412	137670426	139489173	111	-0.021
3	139527532	140539709	1248	-0.055	137868566	156918284	761	-0.4412	139527532	140539709	22	-1.8713
3	140556643	142795483	1248	-0.055	137868566	156918284	761	-0.4412	140556643	143765569	174	-0.0982
3	142821468	143765569	99	-0.1682	137868566	156918284	761	-0.4412	140556643	143765569	174	-0.0982
3	143877033	145548937	99	-0.1682	137868566	156918284	761	-0.4412	143877033	145548937	31	-1.1862
3	145569555	148073906	99	-0.1682	137868566	156918284	761	-0.4412	145569555	168031240	714	0.1466
3	148140402	156918284	387	-0.0721	137868566	156918284	761	-0.4412	145569555	168031240	714	0.1466
3	156931672	157716047	387	-0.0721	156931672	157716047	19	-1.2748	145569555	168031240	714	0.1466
3	157778460	160841688	387	-0.0721	157778460	167953548	263	-0.5655	145569555	168031240	714	0.1466
3	160855926	167215684	120	-0.1699	157778460	167953548	263	-0.5655	145569555	168031240	714	0.1466
3	167310214	167953548	1017	-0.056	157778460	167953548	263	-0.5655	145569555	168031240	714	0.1466
3	168008916	168031240	1017	-0.056	168008916	168570446	16	-0.9338	145569555	168031240	714	0.1466
3	168119618	168551094	1017	-0.056	168008916	168570446	16	-0.9338	168119618	168551094	12	-2.1134
3	168559090	168570446	1017	-0.056	168008916	168570446	16	-0.9338	168559090	169235971	19	-1.0769
3	168609292	169235971	1017	-0.056	168609292	172548250	223	-0.1327	168559090	169235971	19	-1.0769
3	169266854	172548250	1017	-0.056	168609292	172548250	223	-0.1327	169266854	179562542	527	0.141
3	172550319	174018937	1017	-0.056	172550319	174018937	50	-0.8875	169266854	179562542	527	0.141
3	174185307	179505482	1017	-0.056	174185307	179505482	267	-0.35	169266854	179562542	527	0.141
3	179526786	179562542	1017	-0.056	179526786	181555410	84	-0.9162	169266854	179562542	527	0.141
3	179637583	181384000	1017	-0.056	179526786	181555410	84	-0.9162	179637583	181384000	68	-1.5015
3	181392040	181555410	1017	-0.056	179526786	181555410	84	-0.9162	181392040	187238983	493	0.0434
3	181564104	186789472	1017	-0.056	181564104	186789472	461	-0.2233	181392040	187238983	493	0.0434
3	186805709	187047291	1017	-0.056	186805709	187047291	16	-1.2443	181392040	187238983	493	0.0434
3	187063833	187238983	1017	-0.056	187063833	190462866	122	-0.1414	181392040	187238983	493	0.0434
3	187246741	187385083	1017	-0.056	187063833	190462866	122	-0.1414	187246741	187385083	6	-2.2649
3	187470511	190462866	1017	-0.056	187063833	190462866	122	-0.1414	187470511	191908357	170	0.0876
3	190468850	191908357	1017	-0.056	190468850	192432400	71	-0.9488	187470511	191908357	170	0.0876
3	191964538	192018527	1017	-0.056	190468850	192432400	71	-0.9488	191964538	192432400	13	-1.9461
3	192099784	192224146	6	-0.4467	190468850	192432400	71	-0.9488	191964538	192432400	13	-1.9461
3	192239741	192432400	485	-0.0336	190468850	192432400	71	-0.9488	191964538	192432400	13	-1.9461
3	192556310	192859075	485	-0.0336	192556310	197887341	479	-0.2088	192556310	192859075	23	-0.2918
3	192863463	193235362	485	-0.0336	192556310	197887341	479	-0.2088	192863463	193235362	14	-1.7951
3	193258962	197839077	485	-0.0336	192556310	197887341	479	-0.2088	193258962	197887341	442	-0.0053
4	50401	399858	321	-0.0394	50401	16647084	671	-0.3189	50401	399858	27	-1.7607
4	401257	4879257	321	-0.0394	50401	16647084	671	-0.3189	401257	5055630	283	0.0372
4	5004534	5055630	36	-0.1809	50401	16647084	671	-0.3189	401257	5055630	283	0.0372
4	5061786	5647749	36	-0.1809	50401	16647084	671	-0.3189	5061786	5647749	16	-2.3048
4	5694518	6318564	36	-0.1809	50401	16647084	671	-0.3189	5694518	13575240	279	-0.2025
4	6544140	11781162	176	-0.0261	50401	16647084	671	-0.3189	5694518	13575240	279	-0.2025
4	11788387	13575240	66	-0.1679	50401	16647084	671	-0.3189	5694518	13575240	279	-0.2025
4	13627869	14639683	66	-0.1679	50401	16647084	671	-0.3189	13627869	14639683	20	-2.4711
4	14830079	15331279	66	-0.1679	50401	16647084	671	-0.3189	14830079	16070782	38	-0.0423
4	15442481	16070782	45	-0.0321	50401	16647084	671	-0.3189	14830079	16070782	38	-0.0423
4	16158900	16647084	45	-0.0321	50401	16647084	671	-0.3189	16158900	17430818	40	-1.566
4	16657615	16797638	45	-0.0321	16657615	17316128	29	-1.1085	16158900	17430818	40	-1.566
4	16802288	17018054	10	-0.2717	16657615	17316128	29	-1.1085	16158900	17430818	40	-1.566
4	17294444	17316128	47	-0.0551	16657615	17316128	29	-1.1085	16158900	17430818	40	-1.566
4	17347675	17430818	47	-0.0551	17347675	18624118	58	-0.3376	16158900	17430818	40	-1.566
4	17432524	18624118	47	-0.0551	17347675	18624118	58	-0.3376	17432524	20607462	101	-0.4435
4	18667451	19240415	47	-0.0551	18667451	21717952	85	-1.0081	17432524	20607462	101	-0.4435
4	19330063	20499518	24	-0.2344	18667451	21717952	85	-1.0081	17432524	20607462	101	-0.4435
4	20528917	20607462	224	-0.09	18667451	21717952	85	-1.0081	17432524	20607462	101	-0.4435
4	20638391	21717952	224	-0.09	18667451	21717952	85	-1.0081	20638391	22050515	46	-1.8043
4	21788283	22050515	224	-0.09	21788283	27173871	207	-0.3117	20638391	22050515	46	-1.8043
4	22167990	22622770	224	-0.09	21788283	27173871	207	-0.3117	22167990	22622770	14	-0.0677
4	22680407	24432672	224	-0.09	21788283	27173871	207	-0.3117	22680407	24432672	48	-1.8764
4	24517113	27053590	224	-0.09	21788283	27173871	207	-0.3117	24517113	42578417	827	0.0438
4	27343979	35814926	250	-0.1606	27190973	35814926	231	-0.9329	24517113	42578417	827	0.0438
4	35852735	37315307	250	-0.1606	35852735	42801547	463	-0.231	24517113	42578417	827	0.0438
4	37422026	38954597	64	-0.0042	35852735	42801547	463	-0.231	24517113	42578417	827	0.0438
4	38996287	39153416	13	-0.1867	35852735	42801547	463	-0.231	24517113	42578417	827	0.0438
4	39155996	41223090	248	-0.0228	35852735	42801547	463	-0.231	24517113	42578417	827	0.0438
4	41264197	42578417	151	-0.13	35852735	42801547	463	-0.231	24517113	42578417	827	0.0438
4	42589716	42801547	151	-0.13	35852735	42801547	463	-0.231	42589716	47269736	94	-1.9673
4	42844795	47269736	151	-0.13	42844795	47418560	95	-0.932	42589716	47269736	94	-1.9673
4	47295251	47418560	151	-0.13	42844795	47418560	95	-0.932	47295251	49086588	70	-0.1316
4	47458188	47519149	151	-0.13	47458188	49619217	75	-0.3531	47295251	49086588	70	-0.1316
4	47567015	49086588	60	-0.0184	47458188	49619217	75	-0.3531	47295251	49086588	70	-0.1316
4	52747218	53583443	15	-0.1442	52747218	57880761	236	-0.2965	52747218	55078560	66	-0.3269
4	53615687	55078560	121	-0.0497	52747218	57880761	236	-0.2965	52747218	55078560	66	-0.3269
4	55227237	55477235	121	-0.0497	52747218	57880761	236	-0.2965	55227237	55477235	8	-2.1433
4	55482641	57384166	121	-0.0497	52747218	57880761	236	-0.2965	55482641	57943536	165	-0.014
4	57416989	57478508	3	-0.3522	52747218	57880761	236	-0.2965	55482641	57943536	165	-0.014
4	57486553	57880761	55	-0.0404	52747218	57880761	236	-0.2965	55482641	57943536	165	-0.014
4	57905156	57930224	55	-0.0404	57905156	67826209	224	-0.9255	55482641	57943536	165	-0.014
4	58014728	67826209	260	-0.1397	57905156	67826209	224	-0.9255	57956938	68213123	228	-2.0671
4	67861649	68213123	260	-0.1397	67861649	85923738	661	-0.3319	57956938	68213123	228	-2.0671
4	68223193	71130963	260	-0.1397	67861649	85923738	661	-0.3319	68223193	72074072	158	0.0232
4	71175847	72074072	609	-0.0576	67861649	85923738	661	-0.3319	68223193	72074072	158	0.0232
4	72145605	73880619	609	-0.0576	67861649	85923738	661	-0.3319	72145605	73880619	36	-1.6156
4	73897744	79756707	609	-0.0576	67861649	85923738	661	-0.3319	73897744	79756707	220	-0.0039
4	79962281	83149289	609	-0.0576	67861649	85923738	661	-0.3319	79962281	83149289	80	-1.2721
4	83179976	85923738	609	-0.0576	67861649	85923738	661	-0.3319	83179976	109722120	914	0.0242
4	85932802	86692955	609	-0.0576	85932802	86692955	24	-1.3053	83179976	109722120	914	0.0242
4	86718418	92273417	609	-0.0576	86718418	92966538	232	-0.2508	83179976	109722120	914	0.0242
4	92717812	92966538	122	-0.1499	86718418	92966538	232	-0.2508	83179976	109722120	914	0.0242
4	93052715	99121095	122	-0.1499	93052715	99121095	174	-0.7467	83179976	109722120	914	0.0242
4	99137939	99162222	122	-0.1499	99137939	109722120	324	-0.3443	83179976	109722120	914	0.0242
4	99199104	109722120	703	-0.0682	99137939	109722120	324	-0.3443	83179976	109722120	914	0.0242
4	109792564	110238947	703	-0.0682	109792564	110238947	15	-1.2413	109792564	110275150	17	-1.9473
4	110252289	110275150	703	-0.0682	110252289	111116366	57	-0.0205	109792564	110275150	17	-1.9473
4	110281833	111116366	703	-0.0682	110252289	111116366	57	-0.0205	110281833	147428637	1227	0.1077
4	111126153	113059317	703	-0.0682	111126153	113059317	58	-0.6659	110281833	147428637	1227	0.1077
4	113064507	113591714	703	-0.0682	113064507	113591714	29	0.0058	110281833	147428637	1227	0.1077
4	113593664	114242981	703	-0.0682	113593664	114242981	58	-0.8149	110281833	147428637	1227	0.1077
4	114263780	115855634	703	-0.0682	114263780	115855634	45	-0.2518	110281833	147428637	1227	0.1077
4	115890394	118984269	703	-0.0682	115890394	118984269	79	-0.8676	110281833	147428637	1227	0.1077
4	119065428	120791605	703	-0.0682	119065428	120791605	77	-0.2881	110281833	147428637	1227	0.1077
4	120802721	123607511	703	-0.0682	120802721	123607511	87	-0.6968	110281833	147428637	1227	0.1077
4	123640067	125720887	703	-0.0682	123640067	125720887	74	-0.2471	110281833	147428637	1227	0.1077
4	125749306	128442031	703	-0.0682	125749306	128442031	65	-1.0395	110281833	147428637	1227	0.1077
4	128491232	130201798	703	-0.0682	128491232	130201798	110	-0.2311	110281833	147428637	1227	0.1077
4	130231140	130603347	703	-0.0682	130231140	138851872	181	-0.9482	110281833	147428637	1227	0.1077
4	130606924	138851872	190	-0.1473	130231140	138851872	181	-0.9482	110281833	147428637	1227	0.1077
4	138908888	139904658	190	-0.1473	138908888	154637140	582	-0.2546	110281833	147428637	1227	0.1077
4	139907914	147428637	415	-0.0303	138908888	154637140	582	-0.2546	110281833	147428637	1227	0.1077
4	147471269	148008848	415	-0.0303	138908888	154637140	582	-0.2546	147471269	148008848	17	-1.7823
4	148023646	154520928	415	-0.0303	138908888	154637140	582	-0.2546	148023646	154734838	261	0.0365
4	154545259	154637140	353	-0.1185	138908888	154637140	582	-0.2546	148023646	154734838	261	0.0365
4	154665498	154734838	353	-0.1185	154665498	159017906	107	-1.0261	148023646	154734838	261	0.0365
4	154797607	155090858	353	-0.1185	154665498	159017906	107	-1.0261	154797607	155090858	4	-2.2356
4	155181067	159017906	353	-0.1185	154665498	159017906	107	-1.0261	155181067	174504452	630	0.2021
4	159056397	160358491	353	-0.1185	159056397	160358491	64	-0.2202	155181067	174504452	630	0.2021
4	160359119	165616335	353	-0.1185	160359119	165616335	148	-0.9659	155181067	174504452	630	0.2021
4	165660991	165723309	353	-0.1185	165660991	165723309	8	-0.0399	155181067	174504452	630	0.2021
4	165735677	165958568	353	-0.1185	165735677	165958568	24	-0.8836	155181067	174504452	630	0.2021
4	165960874	166401068	353	-0.1185	165960874	166401068	33	-0.315	155181067	174504452	630	0.2021
4	166411709	169014752	353	-0.1185	166411709	169014752	68	-0.9475	155181067	174504452	630	0.2021
4	169102466	170666831	61	0.015	169102466	171094438	102	-0.0894	155181067	174504452	630	0.2021
4	170680208	171094438	337	-0.1479	169102466	171094438	102	-0.0894	155181067	174504452	630	0.2021
4	171154438	173579225	337	-0.1479	171154438	173579225	61	-1.0211	155181067	174504452	630	0.2021
4	173608703	174504452	337	-0.1479	173608703	174504452	24	-0.2094	155181067	174504452	630	0.2021
4	174630222	174729542	337	-0.1479	174630222	174729542	3	-2.1137	174630222	175102457	14	-1.6639
4	174783082	175102457	337	-0.1479	174783082	189254532	716	-0.623	174630222	175102457	14	-1.6639
4	175190760	181852373	337	-0.1479	174783082	189254532	716	-0.623	175190760	181852373	233	0.268
4	181855363	183698803	337	-0.1479	174783082	189254532	716	-0.623	181855363	183698803	90	-1.3907
4	183742835	184649447	59	-0.0624	174783082	189254532	716	-0.623	183742835	190291531	442	0.1569
4	184650598	184665321	3	-0.52	174783082	189254532	716	-0.623	183742835	190291531	442	0.1569
4	184684756	185194585	18	-0.1091	174783082	189254532	716	-0.623	183742835	190291531	442	0.1569
4	185273820	186355095	70	-0.008	174783082	189254532	716	-0.623	183742835	190291531	442	0.1569
4	186370395	189254532	194	-0.0926	174783082	189254532	716	-0.623	183742835	190291531	442	0.1569
4	189259180	190291531	194	-0.0926	189259180	190721126	71	-1.1764	183742835	190291531	442	0.1569
4	190377766	190721126	194	-0.0926	189259180	190721126	71	-1.1764	190377766	190974285	20	-1.0772
4	190766057	190974285	194	-0.0926	190766057	190974285	9	-0.4025	190377766	190974285	20	-1.0772
5	28689	1728837	462	-0.0849	28689	8780979	230	-0.8066	28689	1728837	51	-0.1213
5	1757158	4158498	462	-0.0849	28689	8780979	230	-0.8066	1757158	4158498	53	-2.0044
5	4195631	5691630	462	-0.0849	28689	8780979	230	-0.8066	4195631	5691630	40	-1.1413
5	5732034	6464178	462	-0.0849	28689	8780979	230	-0.8066	5732034	6464178	17	-2.4972
5	6510164	6767492	462	-0.0849	28689	8780979	230	-0.8066	6510164	6767492	9	0.1993
5	6986330	8780979	462	-0.0849	28689	8780979	230	-0.8066	6986330	9899673	85	-1.6994
5	8835246	9707719	462	-0.0849	8835246	9707719	22	0.1195	6986330	9899673	85	-1.6994
5	9718164	9899673	462	-0.0849	9718164	13795000	115	-0.9663	6986330	9899673	85	-1.6994
5	9900825	10939296	462	-0.0849	9718164	13795000	115	-0.9663	9900825	10939296	51	-0.1279
5	10942494	13795000	462	-0.0849	9718164	13795000	115	-0.9663	10942494	13846032	64	-2.2249
5	13798968	13846032	462	-0.0849	13798968	15470779	63	-0.317	10942494	13846032	64	-2.2249
5	13855410	15207959	462	-0.0849	13798968	15470779	63	-0.317	13855410	15207959	56	-0.052
5	15208314	15470779	462	-0.0849	13798968	15470779	63	-0.317	15208314	16394625	28	-2.2235
5	15517228	16063629	462	-0.0849	15517228	16063629	19	-1.285	15208314	16394625	28	-2.2235
5	16085973	16394625	462	-0.0849	16085973	17267720	96	-0.2458	15208314	16394625	28	-2.2235
5	16454521	17143226	462	-0.0849	16085973	17267720	96	-0.2458	16454521	17143226	78	0.2446
5	17145690	17266638	462	-0.0849	16085973	17267720	96	-0.2458	17145690	31326891	462	-1.8286
5	17267618	17267720	425	-0.1451	16085973	17267720	96	-0.2458	17145690	31326891	462	-1.8286
5	17295428	31326891	425	-0.1451	17295428	32080378	517	-0.9228	17145690	31326891	462	-1.8286
5	31375700	32070821	425	-0.1451	17295428	32080378	517	-0.9228	31375700	35030537	209	-0.24
5	32072555	32080378	494	-0.0642	17295428	32080378	517	-0.9228	31375700	35030537	209	-0.24
5	32098288	32466797	494	-0.0642	32098288	32466797	40	-0.2852	31375700	35030537	209	-0.24
5	32480879	33966638	494	-0.0642	32480879	33966638	46	-0.8164	31375700	35030537	209	-0.24
5	34028170	35030537	494	-0.0642	34028170	35649040	75	-0.3074	31375700	35030537	209	-0.24
5	35045965	35649040	494	-0.0642	34028170	35649040	75	-0.3074	35045965	36034372	35	-1.4291
5	35676755	36034372	494	-0.0642	35676755	37218006	53	-0.8781	35045965	36034372	35	-1.4291
5	36120253	37218006	494	-0.0642	35676755	37218006	53	-0.8781	36120253	40974610	191	-0.1223
5	37230202	37759636	494	-0.0642	37230202	37759636	51	-0.1737	36120253	40974610	191	-0.1223
5	37792363	38565782	494	-0.0642	37792363	38565782	19	-1.3014	36120253	40974610	191	-0.1223
5	38578746	40974610	494	-0.0642	38578746	46164323	235	-0.5053	36120253	40974610	191	-0.1223
5	41150913	42681962	494	-0.0642	38578746	46164323	235	-0.5053	41150913	42681962	37	-1.4196
5	42756210	46104940	494	-0.0642	38578746	46164323	235	-0.5053	42756210	46164323	115	-0.1593
5	49486520	50242834	39	-0.1444	49486520	82457910	1345	-0.3264	49486520	50242834	14	-0.0852
5	50348760	51278080	39	-0.1444	49486520	82457910	1345	-0.3264	50348760	51623631	33	-1.4685
5	51345459	51623631	322	-0.0449	49486520	82457910	1345	-0.3264	50348760	51623631	33	-1.4685
5	51661441	58197407	322	-0.0449	49486520	82457910	1345	-0.3264	51661441	58197407	309	-0.1178
5	58210875	59839576	322	-0.0449	49486520	82457910	1345	-0.3264	58210875	59839576	29	-1.3225
5	59849219	61000637	322	-0.0449	49486520	82457910	1345	-0.3264	59849219	61000637	39	-0.1566
5	61118166	61476664	322	-0.0449	49486520	82457910	1345	-0.3264	61118166	61476664	6	-2.3123
5	61542477	62024473	322	-0.0449	49486520	82457910	1345	-0.3264	61542477	62081212	42	-0.2622
5	62109899	62361770	4	-0.4158	49486520	82457910	1345	-0.3264	62109899	63817177	37	-2.0753
5	62402066	63817177	1673	-0.0656	49486520	82457910	1345	-0.3264	62109899	63817177	37	-2.0753
5	63824562	65536889	1673	-0.0656	49486520	82457910	1345	-0.3264	63824562	65536889	93	-0.1042
5	65575758	67376158	1673	-0.0656	49486520	82457910	1345	-0.3264	65575758	67376158	37	-1.3701
5	67377863	75037683	1673	-0.0656	49486520	82457910	1345	-0.3264	67377863	75037683	332	-0.0151
5	75043763	75652626	1673	-0.0656	49486520	82457910	1345	-0.3264	75043763	75652626	17	-1.3165
5	75658998	82457910	1673	-0.0656	49486520	82457910	1345	-0.3264	75658998	96804879	748	-0.0339
5	82547267	85900853	1673	-0.0656	82547267	85900853	81	-1.0201	75658998	96804879	748	-0.0339
5	85911885	96804879	1673	-0.0656	85911885	122196384	959	-0.5114	75658998	96804879	748	-0.0339
5	96839398	97904799	1673	-0.0656	85911885	122196384	959	-0.5114	96839398	97904799	19	-1.7016
5	98055825	98339672	1673	-0.0656	85911885	122196384	959	-0.5114	98055825	98339672	18	0.206
5	98361883	98420592	1673	-0.0656	85911885	122196384	959	-0.5114	98361883	98420592	5	1.9601
5	98426806	98798703	1673	-0.0656	85911885	122196384	959	-0.5114	98426806	98798703	8	-1.3393
5	98866574	109379655	1673	-0.0656	85911885	122196384	959	-0.5114	98866574	109379655	261	0.0584
5	109501703	110016022	1673	-0.0656	85911885	122196384	959	-0.5114	109501703	110016022	7	-1.7906
5	110047727	112897258	1673	-0.0656	85911885	122196384	959	-0.5114	110047727	112897258	87	-0.1897
5	113023928	114362185	1673	-0.0656	85911885	122196384	959	-0.5114	113023928	114362185	30	-1.6581
5	114432532	116900554	1673	-0.0656	85911885	122196384	959	-0.5114	114432532	116900554	77	-0.0081
5	117024062	118133029	1673	-0.0656	85911885	122196384	959	-0.5114	117024062	118133029	22	-1.2453
5	118221071	122196384	1673	-0.0656	85911885	122196384	959	-0.5114	118221071	132680753	540	-0.0203
5	122201118	122252876	1673	-0.0656	122201118	122252876	3	-1.7098	118221071	132680753	540	-0.0203
5	122274559	126654860	1673	-0.0656	122274559	126654860	171	-0.2056	118221071	132680753	540	-0.0203
5	126715384	127528540	1673	-0.0656	126715384	129981444	90	-0.7302	118221071	132680753	540	-0.0203
5	127562412	127909218	12	-0.2808	126715384	129981444	90	-0.7302	118221071	132680753	540	-0.0203
5	127933631	129981444	1308	-0.0457	126715384	129981444	90	-0.7302	118221071	132680753	540	-0.0203
5	130098685	132656623	1308	-0.0457	130098685	132656623	160	-0.1445	118221071	132680753	540	-0.0203
5	132753575	133239302	1308	-0.0457	132680753	133239302	12	-1.0994	132753575	133239302	11	-2.0643
5	133247893	133647120	1308	-0.0457	133247893	133647120	43	-0.0911	133247893	135532570	174	-0.0467
5	133649759	133689335	1308	-0.0457	133649759	133689335	4	-1.6325	133247893	135532570	174	-0.0467
5	133698134	135494512	1308	-0.0457	133698134	135494512	126	-0.1572	133247893	135532570	174	-0.0467
5	135671516	137039998	1308	-0.0457	135532570	137199416	41	-0.9965	135671516	137039998	32	-1.7921
5	137053143	137199416	1308	-0.0457	135532570	137199416	41	-0.9965	137053143	143596331	502	-0.0032
5	137210080	142558527	1308	-0.0457	137210080	142558527	465	-0.22	137053143	143596331	502	-0.0032
5	142634323	143596331	1308	-0.0457	142634323	144518689	57	-0.7988	137053143	143596331	502	-0.0032
5	143633792	144518689	1308	-0.0457	142634323	144518689	57	-0.7988	143633792	144560881	30	-1.6783
5	144555596	144560881	1308	-0.0457	144555596	150479616	241	-0.2579	143633792	144560881	30	-1.6783
5	144597250	150479616	1308	-0.0457	144555596	150479616	241	-0.2579	144597250	151182950	272	-0.2239
5	150529140	151182950	1308	-0.0457	150529140	153442652	77	-0.7933	144597250	151182950	272	-0.2239
5	151222914	153329131	1308	-0.0457	150529140	153442652	77	-0.7933	151222914	153329131	42	-1.9298
5	153346942	153442652	1308	-0.0457	150529140	153442652	77	-0.7933	153346942	154519783	78	-0.0678
5	153443484	154356792	1308	-0.0457	153443484	154356792	69	-0.1786	153346942	154519783	78	-0.0678
5	154358665	154519783	1308	-0.0457	154358665	156520880	65	-0.9611	153346942	154519783	78	-0.0678
5	154521496	156439278	1308	-0.0457	154358665	156520880	65	-0.9611	154521496	156439278	49	-2.1694
5	156464948	156520880	1308	-0.0457	154358665	156520880	65	-0.9611	156464948	157633778	67	-0.2196
5	156525342	157633778	1308	-0.0457	156525342	157633778	58	-0.2632	156464948	157633778	67	-0.2196
5	157649456	158542167	1308	-0.0457	157649456	167347447	352	-0.749	157649456	158542167	20	-2.0973
5	158589535	159858700	1308	-0.0457	157649456	167347447	352	-0.749	158589535	159858700	70	0.0657
5	159875447	160345951	1308	-0.0457	157649456	167347447	352	-0.749	159875447	167669886	270	-1.9301
5	160408797	167347447	208	-0.1434	157649456	167347447	352	-0.749	159875447	167669886	270	-1.9301
5	167423836	167669886	208	-0.1434	167423836	168168400	39	-0.0216	159875447	167669886	270	-1.9301
5	167680064	167684621	208	-0.1434	167423836	168168400	39	-0.0216	167680064	168362067	39	-0.107
5	167698418	168168400	805	-0.0598	167423836	168168400	39	-0.0216	167680064	168362067	39	-0.107
5	168178835	168362067	805	-0.0598	168178835	170252559	58	-1.1153	167680064	168362067	39	-0.107
5	168365728	170248041	805	-0.0598	168178835	170252559	58	-1.1153	168365728	170248041	48	-1.7045
5	170250206	170252559	805	-0.0598	168178835	170252559	58	-1.1153	170250206	178344540	620	-0.1094
5	170255947	178344540	805	-0.0598	170255947	180706713	871	-0.4116	170250206	178344540	620	-0.1094
5	178347562	178587376	805	-0.0598	170255947	180706713	871	-0.4116	178347562	178587376	22	-1.9334
5	178606038	180698548	805	-0.0598	170255947	180706713	871	-0.4116	178606038	180706713	231	-0.1199
6	238812	365508	322	-0.0377	132520	49561578	2995	-0.4596	132520	365508	12	-1.4037
6	390685	6277493	322	-0.0377	132520	49561578	2995	-0.4596	390685	6277493	240	-0.0694
6	6282151	6585811	322	-0.0377	132520	49561578	2995	-0.4596	6282151	6585811	10	-2.4623
6	6600747	7642665	322	-0.0377	132520	49561578	2995	-0.4596	6600747	8282249	124	0.0318
6	7688891	8282249	97	-0.1516	132520	49561578	2995	-0.4596	6600747	8282249	124	0.0318
6	8311465	9985422	97	-0.1516	132520	49561578	2995	-0.4596	8311465	9985422	53	-1.1733
6	10001416	10631272	97	-0.1516	132520	49561578	2995	-0.4596	10001416	12792620	152	0.0291
6	10638498	12792620	1958	-0.0474	132520	49561578	2995	-0.4596	10001416	12792620	152	0.0291
6	12818148	13158206	1958	-0.0474	132520	49561578	2995	-0.4596	12818148	13158206	7	-1.9213
6	13182389	15767888	1958	-0.0474	132520	49561578	2995	-0.4596	13182389	15767888	185	-0.0221
6	15779438	15941993	1958	-0.0474	132520	49561578	2995	-0.4596	15779438	15941993	7	-2.0533
6	15973816	22066098	1958	-0.0474	132520	49561578	2995	-0.4596	15973816	22066098	408	-0.0592
6	22266416	24180106	1958	-0.0474	132520	49561578	2995	-0.4596	22266416	24180106	47	-1.622
6	24238619	28781425	1958	-0.0474	132520	49561578	2995	-0.4596	24238619	28781425	351	-0.045
6	28788578	32360203	1958	-0.0474	132520	49561578	2995	-0.4596	28788578	32360203	301	-1.1466
6	32364681	32619982	1958	-0.0474	132520	49561578	2995	-0.4596	32364681	32619982	11	0.1225
6	32667612	33491445	1958	-0.0474	132520	49561578	2995	-0.4596	32667612	33491445	61	-1.0115
6	33492770	38646896	1958	-0.0474	132520	49561578	2995	-0.4596	33492770	39382887	519	-0.0434
6	38669705	38908612	13	-0.2905	132520	49561578	2995	-0.4596	33492770	39382887	519	-0.0434
6	38915524	39254594	6	0.0217	132520	49561578	2995	-0.4596	33492770	39382887	519	-0.0434
6	39318994	39382887	14	-0.2269	132520	49561578	2995	-0.4596	33492770	39382887	519	-0.0434
6	39397608	40367163	14	-0.2269	132520	49561578	2995	-0.4596	39397608	40846384	32	-1.2829
6	40483346	40846384	617	-0.0567	132520	49561578	2995	-0.4596	39397608	40846384	32	-1.2829
6	40880795	49561578	617	-0.0567	132520	49561578	2995	-0.4596	40880795	50101621	491	-0.0131
6	49579547	50101621	617	-0.0567	49579547	52135051	63	-1.0778	40880795	50101621	491	-0.0131
6	50198432	51898851	617	-0.0567	49579547	52135051	63	-1.0778	50198432	51898851	42	-1.8593
6	51977537	52135051	617	-0.0567	49579547	52135051	63	-1.0778	51977537	52178949	9	0.0403
6	52157120	52178949	617	-0.0567	52157120	58674548	230	-0.4548	51977537	52178949	9	0.0403
6	52184662	52195836	617	-0.0567	52157120	58674548	230	-0.4548	52184662	52195836	3	2.5108
6	52197352	57195910	617	-0.0567	52157120	58674548	230	-0.4548	52197352	57195910	180	-0.0533
6	57213638	58674548	617	-0.0567	52157120	58674548	230	-0.4548	57213638	58674548	43	-1.1108
6	62041228	63089772	313	-0.1412	62041228	63089772	21	-1.2901	62041228	63963181	33	-1.8132
6	63091282	63963181	313	-0.1412	63091282	74094994	293	-0.8192	62041228	63963181	33	-1.8132
6	63968872	64608308	313	-0.1412	63091282	74094994	293	-0.8192	63968872	64608308	43	0.0162
6	64618436	70310444	313	-0.1412	63091282	74094994	293	-0.8192	64618436	70310444	116	-2.0128
6	70335838	72242375	313	-0.1412	63091282	74094994	293	-0.8192	70335838	72242375	54	-0.3966
6	72287921	73873395	313	-0.1412	63091282	74094994	293	-0.8192	72287921	73873395	36	-1.727
6	73875592	74094994	313	-0.1412	63091282	74094994	293	-0.8192	73875592	85008539	356	0.0636
6	74095910	74113845	313	-0.1412	74095910	74373524	51	-0.1396	73875592	85008539	356	0.0636
6	74119898	74373524	487	-0.0676	74095910	74373524	51	-0.1396	73875592	85008539	356	0.0636
6	74396507	75855440	487	-0.0676	74396507	75855440	38	-0.9384	73875592	85008539	356	0.0636
6	75949741	77099550	487	-0.0676	75949741	77099550	55	-0.335	73875592	85008539	356	0.0636
6	77120287	79046188	487	-0.0676	77120287	79046188	34	-1.1561	73875592	85008539	356	0.0636
6	79127723	85008539	487	-0.0676	79127723	86390771	185	-0.3876	73875592	85008539	356	0.0636
6	85020427	86026574	487	-0.0676	79127723	86390771	185	-0.3876	85020427	86026574	16	-1.4161
6	86044643	86390771	487	-0.0676	79127723	86390771	185	-0.3876	86044643	86443674	26	-0.1213
6	86417945	86443674	487	-0.0676	86417945	87805938	23	-1.1913	86044643	86443674	26	-0.1213
6	86699817	87527560	487	-0.0676	86417945	87805938	23	-1.1913	86699817	87527560	15	-2.4679
6	87637952	87805938	487	-0.0676	86417945	87805938	23	-1.1913	87637952	88584636	75	-0.1606
6	87822825	88584636	487	-0.0676	87822825	170866748	3209	-0.4288	87637952	88584636	75	-0.1606
6	88608712	89285948	487	-0.0676	87822825	170866748	3209	-0.4288	88608712	89285948	26	-1.4264
6	89424254	90596882	487	-0.0676	87822825	170866748	3209	-0.4288	89424254	91486805	99	-0.022
6	90597957	91486805	172	-0.148	87822825	170866748	3209	-0.4288	89424254	91486805	99	-0.022
6	91489606	95632689	172	-0.148	87822825	170866748	3209	-0.4288	91489606	95632689	88	-1.9312
6	95637945	97884644	172	-0.148	87822825	170866748	3209	-0.4288	95637945	97884644	65	-0.503
6	97929105	99662813	172	-0.148	87822825	170866748	3209	-0.4288	97929105	99700125	43	-1.4958
6	99685626	99700125	39	-0.0126	87822825	170866748	3209	-0.4288	97929105	99700125	43	-1.4958
6	99738502	100496906	39	-0.0126	87822825	170866748	3209	-0.4288	99738502	114412772	622	0.0461
6	100592229	105635400	115	-0.1507	87822825	170866748	3209	-0.4288	99738502	114412772	622	0.0461
6	105644306	114412772	441	-0.0437	87822825	170866748	3209	-0.4288	99738502	114412772	622	0.0461
6	114494947	114615702	6	-0.1817	87822825	170866748	3209	-0.4288	114494947	114615702	4	-1.4257
6	114656911	114765021	6	-0.1817	87822825	170866748	3209	-0.4288	114656911	115529199	14	-2.6719
6	114782986	115188514	6	-0.4317	87822825	170866748	3209	-0.4288	114656911	115529199	14	-2.6719
6	115193705	115529199	1278	-0.0765	87822825	170866748	3209	-0.4288	114656911	115529199	14	-2.6719
6	115624758	115996159	1278	-0.0765	87822825	170866748	3209	-0.4288	115624758	115996159	8	-1.6001
6	116132091	122301756	1278	-0.0765	87822825	170866748	3209	-0.4288	116132091	122301756	198	-0.0166
6	122357749	122692559	1278	-0.0765	87822825	170866748	3209	-0.4288	122357749	122692559	21	-1.2173
6	122706398	123411053	1278	-0.0765	87822825	170866748	3209	-0.4288	122706398	123411053	30	0.0692
6	123447437	124785221	1278	-0.0765	87822825	170866748	3209	-0.4288	123447437	124785221	34	-1.8288
6	124829583	125658922	1278	-0.0765	87822825	170866748	3209	-0.4288	124829583	125658922	17	-0.2876
6	125731749	126043382	1278	-0.0765	87822825	170866748	3209	-0.4288	125731749	126043382	15	-1.3987
6	126077637	127119038	1278	-0.0765	87822825	170866748	3209	-0.4288	126077637	127119038	25	0.1116
6	127144792	127458460	1278	-0.0765	87822825	170866748	3209	-0.4288	127144792	127458460	11	-1.7114
6	127532872	133212844	1278	-0.0765	87822825	170866748	3209	-0.4288	127532872	133212844	192	0.0791
6	133250905	133771216	1278	-0.0765	87822825	170866748	3209	-0.4288	133250905	133771216	15	-1.4314
6	133874230	146304405	1278	-0.0765	87822825	170866748	3209	-0.4288	133874230	146304405	477	-0.0546
6	146338213	146661774	1278	-0.0765	87822825	170866748	3209	-0.4288	146338213	146661774	10	-1.8692
6	146670295	152097691	1278	-0.0765	87822825	170866748	3209	-0.4288	146670295	153494928	398	-0.0232
6	152117003	153494928	58	-0.189	87822825	170866748	3209	-0.4288	146670295	153494928	398	-0.0232
6	153573098	154043822	58	-0.189	87822825	170866748	3209	-0.4288	153573098	154043822	15	-1.7091
6	154062779	154375225	58	-0.189	87822825	170866748	3209	-0.4288	154062779	159666873	351	-0.127
6	154390382	159666873	346	-0.0494	87822825	170866748	3209	-0.4288	154062779	159666873	351	-0.127
6	159675664	159728198	346	-0.0494	87822825	170866748	3209	-0.4288	159675664	159728198	4	-3.3655
6	159924954	160944007	346	-0.0494	87822825	170866748	3209	-0.4288	159924954	161876819	61	-0.2606
6	161112205	161876819	145	-0.1483	87822825	170866748	3209	-0.4288	159924954	161876819	61	-0.2606
6	161952337	165800211	145	-0.1483	87822825	170866748	3209	-0.4288	161952337	166513748	159	-1.3321
6	165822754	166513748	138	-0.0612	87822825	170866748	3209	-0.4288	161952337	166513748	159	-1.3321
6	166536008	170866748	138	-0.0612	87822825	170866748	3209	-0.4288	166536008	170866748	137	-0.0878
7	151335	1214224	129	-0.0298	28262	1232840	61	-0.3802	28262	3120475	198	-0.0356
7	1221685	1232840	37	-0.1873	28262	1232840	61	-0.3802	28262	3120475	198	-0.0356
7	1238875	1470507	37	-0.1873	1238875	1829684	35	-1.1777	28262	3120475	198	-0.0356
7	1495936	1616210	20	-0.018	1238875	1829684	35	-1.1777	28262	3120475	198	-0.0356
7	1652392	1809725	18	-0.2037	1238875	1829684	35	-1.1777	28262	3120475	198	-0.0356
7	1810625	1829684	159	-0.0343	1238875	1829684	35	-1.1777	28262	3120475	198	-0.0356
7	1830590	2927135	159	-0.0343	1830590	18785262	880	-0.5797	28262	3120475	198	-0.0356
7	2935304	3120475	103	-0.2028	1830590	18785262	880	-0.5797	28262	3120475	198	-0.0356
7	3121314	4607190	103	-0.2028	1830590	18785262	880	-0.5797	3121314	4617477	94	-1.3914
7	4612131	4617477	440	-0.0657	1830590	18785262	880	-0.5797	3121314	4617477	94	-1.3914
7	4619500	8307299	440	-0.0657	1830590	18785262	880	-0.5797	4619500	8456890	374	-0.0175
7	8316478	8456890	47	-0.2223	1830590	18785262	880	-0.5797	4619500	8456890	374	-0.0175
7	8463829	10479802	47	-0.2223	1830590	18785262	880	-0.5797	8463829	10906397	50	-1.8057
7	10607859	10906397	1633	-0.0857	1830590	18785262	880	-0.5797	8463829	10906397	50	-1.8057
7	10927563	18785262	1633	-0.0857	1830590	18785262	880	-0.5797	10927563	30957702	783	-0.0949
7	18862070	19707320	1633	-0.0857	18862070	19707320	28	-1.5442	10927563	30957702	783	-0.0949
7	19727064	22897262	1633	-0.0857	19727064	22897262	115	-0.5561	10927563	30957702	783	-0.0949
7	22914231	23035836	1633	-0.0857	22914231	23035836	9	-2.0375	10927563	30957702	783	-0.0949
7	23044517	30957702	1633	-0.0857	23044517	40205645	727	-0.5797	10927563	30957702	783	-0.0949
7	30968819	32446811	1633	-0.0857	23044517	40205645	727	-0.5797	30968819	32446811	34	-1.7395
7	32490219	37231447	1633	-0.0857	23044517	40205645	727	-0.5797	32490219	37231447	198	-0.0197
7	37316140	39437510	1633	-0.0857	23044517	40205645	727	-0.5797	37316140	39437510	64	-1.426
7	39536911	40205645	1633	-0.0857	23044517	40205645	727	-0.5797	39536911	40942723	101	-0.1539
7	40214911	40942723	1633	-0.0857	40214911	43606342	126	-1.2386	39536911	40942723	101	-0.1539
7	40952702	42746140	1633	-0.0857	40214911	43606342	126	-1.2386	40952702	42746140	56	-2.0401
7	42897065	43606342	1633	-0.0857	40214911	43606342	126	-1.2386	42897065	45138569	157	-0.0507
7	43624720	45138569	1633	-0.0857	43624720	45138569	128	-0.3865	42897065	45138569	157	-0.0507
7	45324815	45673325	1633	-0.0857	45324815	45673325	16	-1.5068	45324815	45673325	16	-2.3329
7	45676232	48212319	1633	-0.0857	45676232	48334136	124	-0.5504	45676232	48212319	119	0.0147
7	48231093	48334136	1633	-0.0857	45676232	48334136	124	-0.5504	48231093	50075842	37	-1.9452
7	48374024	50075842	1633	-0.0857	48374024	50178869	33	-1.3343	48231093	50075842	37	-1.9452
7	50182853	51546231	1633	-0.0857	50182853	52513475	74	-0.4931	50178869	51546231	41	0.0735
7	51550460	52513475	1633	-0.0857	50182853	52513475	74	-0.4931	51550460	54721120	85	-1.8527
7	52528676	54721120	1633	-0.0857	52528676	54794364	55	-1.4639	51550460	54721120	85	-1.8527
7	54764486	54794364	1633	-0.0857	52528676	54794364	55	-1.4639	54764486	56187447	122	-0.0322
7	54815565	56187447	1633	-0.0857	54815565	56496676	144	-0.5102	54764486	56187447	122	-0.0322
7	56208275	56496676	1633	-0.0857	54815565	56496676	144	-0.5102	56208275	56958099	70	-1.7082
7	56505967	56669964	1633	-0.0857	56505967	56669964	20	-1.5907	56208275	56958099	70	-1.7082
7	56672335	56958099	1633	-0.0857	56672335	57873380	79	-0.6856	56208275	56958099	70	-1.7082
7	56959534	57144924	1633	-0.0857	56672335	57873380	79	-0.6856	56959534	57144924	18	-0.4371
7	57170745	57857193	1633	-0.0857	56672335	57873380	79	-0.6856	57170745	57873380	37	-1.4998
7	62191440	63927508	306	-0.054	61060852	64020584	103	-0.8635	61060852	63927508	92	-1.4354
7	63931239	64020584	306	-0.054	61060852	64020584	103	-0.8635	63931239	66849577	324	-0.1785
7	64022534	66813540	306	-0.054	64022534	66847386	312	-0.3464	63931239	66849577	324	-0.1785
7	66815192	66847386	208	-0.1771	64022534	66847386	312	-0.3464	63931239	66849577	324	-0.1785
7	66857556	69503837	208	-0.1771	66849577	69503837	212	-1.2303	66857556	71888021	370	-2.0705
7	69521066	69582736	208	-0.1771	69521066	70298298	53	-0.3155	66857556	71888021	370	-2.0705
7	69591817	70189430	37	-0.0032	69521066	70298298	53	-0.3155	66857556	71888021	370	-2.0705
7	70194887	70298298	162	-0.1601	69521066	70298298	53	-0.3155	66857556	71888021	370	-2.0705
7	70340963	71888021	162	-0.1601	70340963	71971231	114	-1.111	66857556	71888021	370	-2.0705
7	71896007	71971231	162	-0.1601	70340963	71971231	114	-1.111	71896007	88365850	903	0.0008
7	71990612	72002699	162	-0.1601	71990612	77583543	573	-0.294	71896007	88365850	903	0.0008
7	72004478	77583543	536	-0.0334	71990612	77583543	573	-0.294	71896007	88365850	903	0.0008
7	77604543	77674204	536	-0.0334	77604543	80335500	93	-0.8539	71896007	88365850	903	0.0008
7	77715959	80335500	316	-0.1339	77604543	80335500	93	-0.8539	71896007	88365850	903	0.0008
7	80353030	81111065	316	-0.1339	80353030	81111065	37	-0.1061	71896007	88365850	903	0.0008
7	81115340	83531392	316	-0.1339	81115340	83531392	79	-0.9794	71896007	88365850	903	0.0008
7	83582511	83910021	316	-0.1339	83582511	83910021	19	0.249	71896007	88365850	903	0.0008
7	83917938	86323752	316	-0.1339	83917938	86323752	50	-0.9536	71896007	88365850	903	0.0008
7	86433818	88069155	316	-0.1339	86433818	88069155	42	-0.2426	71896007	88365850	903	0.0008
7	88361378	88365850	316	-0.1339	88361378	89714638	25	-1.5163	71896007	88365850	903	0.0008
7	88499623	89267603	316	-0.1339	88361378	89714638	25	-1.5163	88499623	89590319	20	-1.6979
7	89374564	89590319	1138	-0.0525	88361378	89714638	25	-1.5163	88499623	89590319	20	-1.6979
7	89594613	89714638	1138	-0.0525	88361378	89714638	25	-1.5163	89594613	93193857	123	-0.1041
7	89770967	90091388	1138	-0.0525	89770967	90091388	17	-0.1295	89594613	93193857	123	-0.1041
7	90128990	91551151	1138	-0.0525	90128990	91551151	39	-1.302	89594613	93193857	123	-0.1041
7	91579636	93193857	1138	-0.0525	91579636	108353063	992	-0.4937	89594613	93193857	123	-0.1041
7	93310607	93643842	1138	-0.0525	91579636	108353063	992	-0.4937	93310607	93643842	6	-1.6426
7	93645826	103184017	1138	-0.0525	91579636	108353063	992	-0.4937	93645826	103184017	693	-0.1011
7	103186181	104551650	1138	-0.0525	91579636	108353063	992	-0.4937	103186181	104551650	36	-1.3721
7	104566031	108208653	1138	-0.0525	91579636	108353063	992	-0.4937	104566031	135626724	1133	-0.0126
7	108325382	108353063	432	-0.1311	91579636	108353063	992	-0.4937	104566031	135626724	1133	-0.0126
7	108379148	109974063	432	-0.1311	108379148	109974063	26	-1.3715	104566031	135626724	1133	-0.0126
7	110025545	114320723	432	-0.1311	110025545	114320723	118	-0.6292	104566031	135626724	1133	-0.0126
7	114391262	115992005	432	-0.1311	114391262	115992005	35	-1.264	104566031	135626724	1133	-0.0126
7	115993145	126034738	432	-0.1311	115993145	135626724	761	-0.4877	104566031	135626724	1133	-0.0126
7	126163553	135626724	894	-0.0628	115993145	135626724	761	-0.4877	104566031	135626724	1133	-0.0126
7	135704543	136488621	894	-0.0628	135704543	136488621	24	-1.4885	135704543	137405096	51	-2.0671
7	136488974	137405096	894	-0.0628	136488974	138474638	103	-0.7869	135704543	137405096	51	-2.0671
7	137455372	138474638	894	-0.0628	136488974	138474638	103	-0.7869	137455372	140797093	277	-0.0469
7	138498314	140797093	894	-0.0628	138498314	140799722	202	-0.3126	137455372	140797093	277	-0.0469
7	140838708	141214876	894	-0.0628	140838708	141245767	16	-1.4675	140799722	141214876	16	-1.9609
7	141250223	144253111	894	-0.0628	141250223	144253111	100	-0.4984	141245767	144643131	124	-0.2633
7	144263288	144643131	894	-0.0628	144263288	147696267	146	-1.2547	141245767	144643131	124	-0.2633
7	144704688	144893445	894	-0.0628	144263288	147696267	146	-1.2547	144704688	148098783	149	-1.967
7	144898249	147696267	83	-0.1569	144263288	147696267	146	-1.2547	144704688	148098783	149	-1.967
7	147751157	147911653	83	-0.1569	147751157	159109010	621	-0.5583	144704688	148098783	149	-1.967
7	147925634	148098783	312	-0.0413	147751157	159109010	621	-0.5583	144704688	148098783	149	-1.967
7	148108450	152183356	312	-0.0413	147751157	159109010	621	-0.5583	148108450	152700720	354	-0.1096
7	152197722	152700720	127	-0.122	147751157	159109010	621	-0.5583	148108450	152700720	354	-0.1096
7	152750685	154616082	127	-0.122	147751157	159109010	621	-0.5583	152750685	154616082	53	-1.9475
7	154711048	155349120	127	-0.122	147751157	159109010	621	-0.5583	154711048	159109010	188	-0.1776
7	155416514	156793706	37	-0.0445	147751157	159109010	621	-0.5583	154711048	159109010	188	-0.1776
7	156794185	156805345	3	0.35	147751157	159109010	621	-0.5583	154711048	159109010	188	-0.1776
7	156819959	159049287	163	-0.0372	147751157	159109010	621	-0.5583	154711048	159109010	188	-0.1776
8	207053	658682	15	-0.0376	207053	2211394	62	-0.1502	207053	1674054	33	-1.557
8	704575	1674054	26	-0.2028	207053	2211394	62	-0.1502	207053	1674054	33	-1.557
8	1722877	1943908	14	0.0495	207053	2211394	62	-0.1502	1685340	1973768	20	0.3568
8	1958441	1973768	185	-0.1499	207053	2211394	62	-0.1502	1685340	1973768	20	0.3568
8	2017793	2211394	185	-0.1499	207053	2211394	62	-0.1502	2017793	5905684	125	-2.0509
8	2240670	4612584	185	-0.1499	2240670	4612584	82	-0.7508	2017793	5905684	125	-2.0509
8	4692403	5905684	185	-0.1499	4692403	9656239	234	-0.1973	2017793	5905684	125	-2.0509
8	5931994	6202386	185	-0.1499	4692403	9656239	234	-0.1973	5931994	12928028	306	-0.3084
8	6205134	8955748	118	-0.0197	4692403	9656239	234	-0.1973	5931994	12928028	306	-0.3084
8	8985722	9656239	173	-0.1008	4692403	9656239	234	-0.1973	5931994	12928028	306	-0.3084
8	9671524	9835333	173	-0.1008	9671524	9835333	10	-1.258	5931994	12928028	306	-0.3084
8	9844636	12900251	173	-0.1008	9844636	34592078	1063	-0.1949	5931994	12928028	306	-0.3084
8	12902115	12928028	135	-0.1915	9844636	34592078	1063	-0.1949	5931994	12928028	306	-0.3084
8	12929893	16345770	135	-0.1915	9844636	34592078	1063	-0.1949	12929893	16519926	146	-1.9705
8	16355385	16519926	169	-0.0674	9844636	34592078	1063	-0.1949	12929893	16519926	146	-1.9705
8	16545630	19696507	169	-0.0674	9844636	34592078	1063	-0.1949	16545630	19696507	147	0.0049
8	19780303	21585778	57	-0.1743	9844636	34592078	1063	-0.1949	19764003	21585879	61	-1.7239
8	21587839	23037603	114	-0.0136	9844636	34592078	1063	-0.1949	21587839	24494012	165	-0.1233
8	23072748	24494012	77	-0.1305	9844636	34592078	1063	-0.1949	21587839	24494012	165	-0.1233
8	24535615	24801327	77	-0.1305	9844636	34592078	1063	-0.1949	24535615	24801327	5	-3.1409
8	24837503	25078125	77	-0.1305	9844636	34592078	1063	-0.1949	24837503	26521772	79	-0.4312
8	25081624	25508901	25	0.022	9844636	34592078	1063	-0.1949	24837503	26521772	79	-0.4312
8	25672962	25930872	6	-0.2261	9844636	34592078	1063	-0.1949	24837503	26521772	79	-0.4312
8	25971305	26274966	22	-0.0103	9844636	34592078	1063	-0.1949	24837503	26521772	79	-0.4312
8	26283938	26521772	28	-0.1962	9844636	34592078	1063	-0.1949	24837503	26521772	79	-0.4312
8	26578287	27057085	28	-0.1962	9844636	34592078	1063	-0.1949	26578287	27085150	17	-2.2039
8	27171953	31063360	267	-0.0348	9844636	34592078	1063	-0.1949	27111392	31191774	229	0.0396
8	31066054	31191774	41	-0.2006	9844636	34592078	1063	-0.1949	27111392	31191774	229	0.0396
8	31213166	32394365	41	-0.2006	9844636	34592078	1063	-0.1949	31213166	32394365	37	-1.8506
8	32413082	32864197	41	-0.2006	9844636	34592078	1063	-0.1949	32413082	33505122	57	0.0048
8	32975766	33369124	21	-0.0283	9844636	34592078	1063	-0.1949	32413082	33505122	57	0.0048
8	33371259	33505122	91	-0.1837	9844636	34592078	1063	-0.1949	32413082	33505122	57	0.0048
8	33508167	34592078	91	-0.1837	9844636	34592078	1063	-0.1949	33508167	37282828	82	-2.0865
8	34623920	36657145	91	-0.1837	34623920	36657145	51	-0.6593	33508167	37282828	82	-2.0865
8	36683820	36963216	91	-0.1837	36683820	39055989	152	-0.1201	33508167	37282828	82	-2.0865
8	36979321	37282828	357	-0.0645	36683820	39055989	152	-0.1201	33508167	37282828	82	-2.0865
8	37450639	39055989	357	-0.0645	36683820	39055989	152	-0.1201	37450639	40050982	186	-0.0383
8	39150441	39832364	357	-0.0645	39150441	39832364	24	-0.9784	37450639	40050982	186	-0.0383
8	39849182	40050982	357	-0.0645	39849182	40116479	18	0.1962	37450639	40050982	186	-0.0383
8	40120627	40799549	357	-0.0645	40120627	41276924	36	-0.9997	40116479	40799549	16	-2.7072
8	40854855	41276924	357	-0.0645	40120627	41276924	36	-0.9997	40854855	43801451	223	0.037
8	41284814	42555249	357	-0.0645	41284814	42555249	119	-0.1722	40854855	43801451	223	0.037
8	42557830	42680533	357	-0.0645	42557830	42680533	24	-1.0231	40854855	43801451	223	0.037
8	42682021	43546429	357	-0.0645	42682021	43801451	59	-0.3244	40854855	43801451	223	0.037
8	46941942	48158808	23	-0.1841	46864127	49820625	114	-0.5234	46864127	49820625	114	-0.0696
8	48175985	49592469	92	-0.0148	46864127	49820625	114	-0.5234	46864127	49820625	114	-0.0696
8	49603318	49820625	1017	-0.0955	46864127	49820625	114	-0.5234	46864127	49820625	114	-0.0696
8	49982418	52621907	1017	-0.0955	49982418	52621907	65	-1.3001	49982418	52681586	69	-2.1021
8	52655870	52681586	1017	-0.0955	52655870	55067914	128	-0.4728	49982418	52681586	69	-2.1021
8	52690387	55067914	1017	-0.0955	52655870	55067914	128	-0.4728	52690387	55475158	150	-0.3581
8	55076851	55475158	1017	-0.0955	55076851	56509165	51	-1.1474	52690387	55475158	150	-0.3581
8	55489668	56484849	1017	-0.0955	55076851	56509165	51	-1.1474	55489668	56484849	24	-1.9525
8	56524433	57022777	1017	-0.0955	56524433	57022777	40	-0.5003	56509165	57320711	54	-0.2617
8	57035831	57320711	1017	-0.0955	57035831	61022255	116	-1.3452	56509165	57320711	54	-0.2617
8	57340747	59240551	1017	-0.0955	57035831	61022255	116	-1.3452	57340747	59240551	66	-1.6629
8	59262253	61022255	1017	-0.0955	57035831	61022255	116	-1.3452	59262253	61977353	75	0.0125
8	61050782	61977353	1017	-0.0955	61050782	64141080	77	-0.4875	59262253	61977353	75	0.0125
8	61998710	62299870	1017	-0.0955	61050782	64141080	77	-0.4875	61998710	62299870	4	-2.6616
8	62333085	64141080	1017	-0.0955	61050782	64141080	77	-0.4875	62333085	64468152	50	-0.3864
8	64144983	64468152	1017	-0.0955	64144983	66375244	52	-1.3653	62333085	64468152	50	-0.3864
8	64489417	66375244	1017	-0.0955	64144983	66375244	52	-1.3653	64489417	66418440	38	-2.1251
8	66469132	68808547	1017	-0.0955	66418440	73073621	262	-0.7291	66469132	68808547	136	-0.2713
8	68819999	70609549	1017	-0.0955	66418440	73073621	262	-0.7291	68819999	70609549	38	-2.4664
8	70636100	71581994	1017	-0.0955	66418440	73073621	262	-0.7291	70636100	71581994	60	-0.3933
8	71616341	73073621	1017	-0.0955	66418440	73073621	262	-0.7291	71616341	73718774	42	-2.241
8	73083745	73718774	1017	-0.0955	73083745	73910982	17	-1.6237	71616341	73718774	42	-2.241
8	73828078	73910982	1017	-0.0955	73083745	73910982	17	-1.6237	73828078	82960846	276	-0.1865
8	73919577	74890849	1017	-0.0955	73919577	74890849	72	-0.501	73828078	82960846	276	-0.1865
8	74900313	74988651	1017	-0.0955	74900313	74988651	5	-1.9821	73828078	82960846	276	-0.1865
8	75028336	75364277	1017	-0.0955	75028336	75364277	14	-0.5388	73828078	82960846	276	-0.1865
8	75464691	76307043	1017	-0.0955	75464691	76307043	18	-1.5868	73828078	82960846	276	-0.1865
8	76331055	76611888	1017	-0.0955	76331055	76611888	12	-0.009	73828078	82960846	276	-0.1865
8	76635682	82960846	1017	-0.0955	76635682	87848298	293	-1.0231	73828078	82960846	276	-0.1865
8	83055560	83304830	1017	-0.0955	76635682	87848298	293	-1.0231	83055560	86005511	68	-2.215
8	83312715	85719010	47	-0.2186	76635682	87848298	293	-1.0231	83055560	86005511	68	-2.215
8	85766301	86005511	186	-0.117	76635682	87848298	293	-1.0231	83055560	86005511	68	-2.215
8	86016605	87848298	186	-0.117	76635682	87848298	293	-1.0231	86016605	92497172	181	-0.1877
8	87885422	89601342	186	-0.117	87885422	89601342	43	-1.7715	86016605	92497172	181	-0.1877
8	89630992	92497172	186	-0.117	89630992	94699595	111	-0.9768	86016605	92497172	181	-0.1877
8	92561573	93558646	186	-0.117	89630992	94699595	111	-0.9768	92561573	93558646	21	-2.5177
8	93714542	94139252	186	-0.117	89630992	94699595	111	-0.9768	93714542	94139252	9	-0.3132
8	94207225	94570137	186	-0.117	89630992	94699595	111	-0.9768	94207225	94570137	10	-2.2052
8	94570830	94699595	186	-0.117	89630992	94699595	111	-0.9768	94570830	96331230	115	-0.2732
8	94763140	96093381	113	-0.0195	94763140	96331230	110	-0.4054	94570830	96331230	115	-0.2732
8	96094008	96331230	70	-0.1456	94763140	96331230	110	-0.4054	94570830	96331230	115	-0.2732
8	96360961	97192206	70	-0.1456	96360961	97192206	23	-1.6974	96360961	97192206	23	-2.7223
8	97209654	97353816	70	-0.1456	97209654	97353816	11	-0.1558	97209654	97353816	11	-0.4801
8	97404961	98261728	70	-0.1456	97404961	98646651	33	-1.45	97404961	98261728	29	-1.9552
8	98301145	98638662	70	-0.1456	97404961	98646651	33	-1.45	98301145	104104044	329	-0.1724
8	98644272	98646651	346	-0.0233	97404961	98646651	33	-1.45	98301145	104104044	329	-0.1724
8	98649292	104104044	346	-0.0233	98649292	112406346	551	-0.7373	98301145	104104044	329	-0.1724
8	104184722	104431100	346	-0.0233	98649292	112406346	551	-0.7373	104184722	106682648	87	-1.5501
8	104488311	106682648	280	-0.1667	98649292	112406346	551	-0.7373	104184722	106682648	87	-1.5501
8	106703569	107822440	280	-0.1667	98649292	112406346	551	-0.7373	106703569	107822440	32	-0.0069
8	107871649	109848999	280	-0.1667	98649292	112406346	551	-0.7373	107871649	109848999	48	-1.8306
8	109849927	110708586	280	-0.1667	98649292	112406346	551	-0.7373	109849927	110708586	24	-0.168
8	110763218	112406346	280	-0.1667	98649292	112406346	551	-0.7373	110763218	117629629	169	-2.5394
8	112437174	116832129	280	-0.1667	112437174	117631832	135	-1.5652	110763218	117629629	169	-2.5394
8	116926394	117629629	581	-0.065	112437174	117631832	135	-1.5652	110763218	117629629	169	-2.5394
8	117662978	134531907	581	-0.065	117662978	146297866	1089	-0.686	117631832	134762797	658	-0.388
8	134547761	134762797	116	-0.1536	117662978	146297866	1089	-0.686	117631832	134762797	658	-0.388
8	134931627	135970715	116	-0.1536	117662978	146297866	1089	-0.686	134931627	135970715	20	-2.0098
8	136070736	136613034	116	-0.1536	117662978	146297866	1089	-0.686	136070736	136613034	14	-0.5338
8	136638971	140529046	116	-0.1536	117662978	146297866	1089	-0.686	136638971	140529046	114	-2.4073
8	140574278	140683742	116	-0.1536	117662978	146297866	1089	-0.686	140574278	142495040	107	-0.1991
8	140827637	142495040	353	-0.0409	117662978	146297866	1089	-0.686	140574278	142495040	107	-0.1991
8	142655288	142979368	353	-0.0409	117662978	146297866	1089	-0.686	142655288	142979368	5	-3.2627
8	143150930	146276311	353	-0.0409	117662978	146297866	1089	-0.686	143150930	146297866	172	-0.3615
9	213732	1313875	374	-0.0378	119529	1313875	81	-0.3782	119529	1313875	81	-0.2937
9	1322320	2001190	374	-0.0378	1322320	2010212	21	-1.3195	1322320	2001190	20	-2.2588
9	2034169	7067888	374	-0.0378	2034169	7067888	227	-0.4089	2010212	7445425	231	-0.1798
9	7302082	7445425	374	-0.0378	7302082	14029524	151	-1.0277	2010212	7445425	231	-0.1798
9	7495346	9134056	374	-0.0378	7302082	14029524	151	-1.0277	7495346	14225380	151	-1.7663
9	9150502	10619151	30	-0.2062	7302082	14029524	151	-1.0277	7495346	14225380	151	-1.7663
9	10659668	14029524	503	-0.0844	7302082	14029524	151	-1.0277	7495346	14225380	151	-1.7663
9	14100637	14225380	503	-0.0844	14100637	15609190	87	-0.2542	7495346	14225380	151	-1.7663
9	14229893	15609190	503	-0.0844	14100637	15609190	87	-0.2542	14229893	15778219	90	-0.3259
9	15651199	15778219	503	-0.0844	15651199	26825236	329	-0.8627	14229893	15778219	90	-0.3259
9	15779450	19001589	503	-0.0844	15651199	26825236	329	-0.8627	15779450	19001589	101	-1.6117
9	19006967	22468692	503	-0.0844	15651199	26825236	329	-0.8627	19006967	22468692	118	-0.198
9	22538243	24897740	503	-0.0844	15651199	26825236	329	-0.8627	22538243	24897740	53	-1.8969
9	24924871	25216901	503	-0.0844	15651199	26825236	329	-0.8627	24924871	25216901	11	-0.4512
9	25242514	26594640	503	-0.0844	15651199	26825236	329	-0.8627	25242514	26594640	39	-1.9538
9	26847305	27541427	503	-0.0844	26847305	27738947	45	-0.2201	26825236	27541427	37	-0.1483
9	27581693	27631945	503	-0.0844	26847305	27738947	45	-0.2201	27581693	32440190	105	-1.4761
9	27681586	27738947	68	-0.1698	26847305	27738947	45	-0.2201	27581693	32440190	105	-1.4761
9	27794124	32019072	68	-0.1698	27794124	32019072	89	-1.1195	27581693	32440190	105	-1.4761
9	32060569	32377551	68	-0.1698	32060569	47266171	693	-0.4094	27581693	32440190	105	-1.4761
9	32406338	32440190	466	-0.038	32060569	47266171	693	-0.4094	27581693	32440190	105	-1.4761
9	32464480	44446367	466	-0.038	32060569	47266171	693	-0.4094	32464480	44446367	628	-0.091
9	44484332	44782389	466	-0.038	32060569	47266171	693	-0.4094	44484332	44782389	26	-1.1117
9	44790788	44898559	466	-0.038	32060569	47266171	693	-0.4094	44790788	47266171	32	-0.1468
9	65604940	70885723	1174	-0.0534	65525248	73013497	172	-0.301	65525248	70885723	80	-0.2256
9	71036557	71531712	1174	-0.0534	65525248	73013497	172	-0.301	71036557	71531712	25	-1.8704
9	71561401	73013497	1174	-0.0534	65525248	73013497	172	-0.301	71561401	73513131	84	-0.1674
9	73038748	73513131	1174	-0.0534	73038748	74239487	39	-0.9502	71561401	73513131	84	-0.1674
9	73513588	74175826	1174	-0.0534	73038748	74239487	39	-0.9502	73513588	74175826	21	-2.326
9	74240324	75619406	1174	-0.0534	74240324	75619406	108	-0.1428	74239487	75936231	114	0.0406
9	75643131	75936231	1174	-0.0534	75643131	77334809	33	-0.8801	74239487	75936231	114	0.0406
9	75938956	77223404	1174	-0.0534	75643131	77334809	33	-0.8801	75938956	77223404	26	-1.9198
9	77294943	77334809	1174	-0.0534	75643131	77334809	33	-0.8801	77294943	77859983	32	-0.1145
9	77341350	77859983	1174	-0.0534	77341350	79465057	106	-0.1298	77294943	77859983	32	-0.1145
9	77881622	78423845	1174	-0.0534	77341350	79465057	106	-0.1298	77881622	78423845	14	-2.0757
9	78451200	79465057	1174	-0.0534	77341350	79465057	106	-0.1298	78451200	81711401	171	-0.1243
9	79466388	79773322	1174	-0.0534	79466388	79773322	26	-0.619	78451200	81711401	171	-0.1243
9	79781019	81107935	1174	-0.0534	79781019	81107935	70	0.0399	78451200	81711401	171	-0.1243
9	81113765	81711401	1174	-0.0534	81113765	84125400	85	-0.9252	78451200	81711401	171	-0.1243
9	81725874	83925976	1174	-0.0534	81113765	84125400	85	-0.9252	81725874	83925976	53	-1.8427
9	83940576	84125400	1174	-0.0534	81113765	84125400	85	-0.9252	83940576	84679257	90	-0.2269
9	84129822	84349280	1174	-0.0534	84129822	84349280	31	-0.0972	83940576	84679257	90	-0.2269
9	84362290	84679257	1174	-0.0534	84362290	85304025	64	-0.8665	83940576	84679257	90	-0.2269
9	84687721	85304025	1174	-0.0534	84362290	85304025	64	-0.8665	84687721	85852609	37	-1.8649
9	85360290	85852609	1174	-0.0534	85360290	88874977	184	-0.2288	84687721	85852609	37	-1.8649
9	85880239	87111707	1174	-0.0534	85360290	88874977	184	-0.2288	85880239	87111707	76	-0.2355
9	87149815	87717614	1174	-0.0534	85360290	88874977	184	-0.2288	87149815	87717614	20	-1.7313
9	87721142	88874977	1174	-0.0534	85360290	88874977	184	-0.2288	87721142	89048249	83	-0.0468
9	88917624	89048249	1174	-0.0534	88917624	90012035	47	-0.8589	87721142	89048249	83	-0.0468
9	89054374	89925590	1174	-0.0534	88917624	90012035	47	-0.8589	89054374	89925590	35	-1.8812
9	89938650	90012035	1174	-0.0534	88917624	90012035	47	-0.8589	89938650	92307888	142	-0.2624
9	90023531	90593414	1174	-0.0534	90023531	90593414	29	-0.1243	89938650	92307888	142	-0.2624
9	90599945	90718414	1174	-0.0534	90599945	90718414	14	-0.8148	89938650	92307888	142	-0.2624
9	90754009	92307888	1174	-0.0534	90754009	104222490	721	-0.2984	89938650	92307888	142	-0.2624
9	92339554	93628273	1174	-0.0534	90754009	104222490	721	-0.2984	92339554	93628273	34	-1.5357
9	93653520	100992933	1174	-0.0534	90754009	104222490	721	-0.2984	93653520	104346231	596	-0.0371
9	101018627	104222490	162	-0.1189	90754009	104222490	721	-0.2984	93653520	104346231	596	-0.0371
9	104226116	104346231	162	-0.1189	104226116	107395548	71	-0.9268	93653520	104346231	596	-0.0371
9	104379406	106792672	162	-0.1189	104226116	107395548	71	-0.9268	104379406	106792672	46	-2.1749
9	106796542	107395548	162	-0.1189	104226116	107395548	71	-0.9268	106796542	108636861	98	-0.3805
9	107401194	107425684	162	-0.1189	107401194	108641061	78	-0.4322	106796542	108636861	98	-0.3805
9	107504171	108636861	245	-0.0307	107401194	108641061	78	-0.4322	106796542	108636861	98	-0.3805
9	108665642	109986160	245	-0.0307	108665642	109986160	30	-0.906	108641061	109986160	31	-1.1324
9	110031268	113437843	245	-0.0307	110031268	119629753	459	-0.2836	110031268	118133613	422	-0.0372
9	113466986	114109441	28	-0.1925	110031268	119629753	459	-0.2836	110031268	118133613	422	-0.0372
9	114145919	117240421	184	-0.0459	110031268	119629753	459	-0.2836	110031268	118133613	422	-0.0372
9	117248005	118133613	54	-0.1081	110031268	119629753	459	-0.2836	110031268	118133613	422	-0.0372
9	118279405	118684277	54	-0.1081	110031268	119629753	459	-0.2836	118279405	118684277	9	-2.1316
9	118691737	119472727	54	-0.1081	110031268	119629753	459	-0.2836	118691737	119505883	21	0.015
9	119502785	119505883	30	-0.252	110031268	119629753	459	-0.2836	118691737	119505883	21	0.015
9	119540214	119629753	30	-0.252	110031268	119629753	459	-0.2836	119540214	122926815	89	-1.9115
9	119664228	121422518	30	-0.252	119664228	122357191	67	-0.8056	119540214	122926815	89	-1.9115
9	121445715	122357191	1402	-0.048	119664228	122357191	67	-0.8056	119540214	122926815	89	-1.9115
9	122360566	122926815	1402	-0.048	122360566	122967380	16	-1.5286	119540214	122926815	89	-1.9115
9	123034039	137387404	1402	-0.048	123034039	141067511	1444	-0.299	122967380	137387404	1216	-0.0286
9	137392129	138209666	1402	-0.048	123034039	141067511	1444	-0.299	137392129	138209666	22	-1.3507
9	138278453	141004890	1402	-0.048	123034039	141067511	1444	-0.299	138278453	141067511	207	-0.0579
10	146905	1238807	78	-0.0185	77523	35871273	1919	-0.3575	77523	1238807	64	-0.1156
10	1513178	1556137	78	-0.0185	77523	35871273	1919	-0.3575	1513178	2857562	39	-2.1999
10	1642574	2857562	58	-0.1385	77523	35871273	1919	-0.3575	1513178	2857562	39	-2.1999
10	2878883	3359601	58	-0.1385	77523	35871273	1919	-0.3575	2878883	6437118	154	-0.0829
10	3440809	6043811	110	-0.0297	77523	35871273	1919	-0.3575	2878883	6437118	154	-0.0829
10	6055796	6109063	4	-0.3117	77523	35871273	1919	-0.3575	2878883	6437118	154	-0.0829
10	6110128	6437118	42	-0.0306	77523	35871273	1919	-0.3575	2878883	6437118	154	-0.0829
10	6439151	6647619	42	-0.0306	77523	35871273	1919	-0.3575	6439151	7774783	69	-1.7853
10	6683085	7774783	115	-0.152	77523	35871273	1919	-0.3575	6439151	7774783	69	-1.7853
10	7783234	8125104	115	-0.152	77523	35871273	1919	-0.3575	7783234	8125104	26	-0.0327
10	8143001	10009401	115	-0.152	77523	35871273	1919	-0.3575	8143001	11414389	105	-1.9025
10	10037315	11414389	846	-0.0616	77523	35871273	1919	-0.3575	8143001	11414389	105	-1.9025
10	11419952	13953654	846	-0.0616	77523	35871273	1919	-0.3575	11419952	13953654	271	-0.0005
10	13969181	14506000	846	-0.0616	77523	35871273	1919	-0.3575	13969181	14506000	30	-1.814
10	14568929	15512049	846	-0.0616	77523	35871273	1919	-0.3575	14568929	15512049	76	-0.085
10	15513649	15715175	846	-0.0616	77523	35871273	1919	-0.3575	15513649	15715175	21	-1.7215
10	15722319	15945916	846	-0.0616	77523	35871273	1919	-0.3575	15722319	15945916	12	-0.1217
10	15990382	16393325	846	-0.0616	77523	35871273	1919	-0.3575	15990382	16393325	17	-1.7702
10	16436937	19061623	846	-0.0616	77523	35871273	1919	-0.3575	16436937	19061623	138	-0.1241
10	19077140	21051360	846	-0.0616	77523	35871273	1919	-0.3575	19077140	21051360	73	-2.0581
10	21088177	23740255	846	-0.0616	77523	35871273	1919	-0.3575	21088177	23793290	150	-0.0089
10	23767618	23793290	20	-0.254	77523	35871273	1919	-0.3575	21088177	23793290	150	-0.0089
10	23816372	24435417	20	-0.254	77523	35871273	1919	-0.3575	23816372	24659118	35	-1.7522
10	24477753	24659118	72	-0.041	77523	35871273	1919	-0.3575	23816372	24659118	35	-1.7522
10	24673558	25375376	72	-0.041	77523	35871273	1919	-0.3575	24673558	25849287	64	0.0445
10	25388817	25849287	65	-0.1481	77523	35871273	1919	-0.3575	24673558	25849287	64	0.0445
10	25925328	26582199	65	-0.1481	77523	35871273	1919	-0.3575	25925328	26582199	34	-1.6032
10	26633950	26855703	65	-0.1481	77523	35871273	1919	-0.3575	26633950	35895066	542	0.0188
10	26885492	35830339	539	-0.0591	77523	35871273	1919	-0.3575	26633950	35895066	542	0.0188
10	35837240	35871273	97	-0.137	77523	35871273	1919	-0.3575	26633950	35895066	542	0.0188
10	35910380	37085248	97	-0.137	35895066	37085248	70	-1.065	35910380	37958243	107	-1.9783
10	37095651	37958243	97	-0.137	37095651	39060663	84	-0.5218	35910380	37958243	107	-1.9783
10	38079971	38693096	25	-0.0476	37095651	39060663	84	-0.5218	38015763	38693096	42	-0.2904
10	42866696	43061945	197	-0.0566	42700411	65545481	656	-0.4524	42700411	43061945	11	-1.6408
10	43072505	43964737	197	-0.0566	42700411	65545481	656	-0.4524	43072505	43964737	54	0.2357
10	43968648	45096779	197	-0.0566	42700411	65545481	656	-0.4524	43968648	45096779	25	-1.6532
10	45128177	52640755	197	-0.0566	42700411	65545481	656	-0.4524	45128177	54566778	231	-0.3549
10	52665485	54566778	201	-0.1398	42700411	65545481	656	-0.4524	45128177	54566778	231	-0.3549
10	54626366	59734761	201	-0.1398	42700411	65545481	656	-0.4524	54626366	59734761	133	-2.0583
10	59815517	61215475	201	-0.1398	42700411	65545481	656	-0.4524	59815517	77153541	969	-0.0402
10	61307330	65545481	189	-0.0381	42700411	65545481	656	-0.4524	59815517	77153541	969	-0.0402
10	65555888	66004102	189	-0.0381	65555888	69578506	108	-0.8711	59815517	77153541	969	-0.0402
10	66069479	68471298	58	-0.1663	65555888	69578506	108	-0.8711	59815517	77153541	969	-0.0402
10	68488344	69578506	714	-0.041	65555888	69578506	108	-0.8711	59815517	77153541	969	-0.0402
10	69579015	77153541	714	-0.041	69579015	82873619	836	-0.2395	59815517	77153541	969	-0.0402
10	77245428	78653422	714	-0.041	69579015	82873619	836	-0.2395	77245428	78653422	29	-1.3376
10	78683111	79800769	714	-0.041	69579015	82873619	836	-0.2395	78683111	82431175	138	-0.2643
10	79804757	82431175	175	-0.1331	69579015	82873619	836	-0.2395	78683111	82431175	138	-0.2643
10	82545286	82873619	175	-0.1331	69579015	82873619	836	-0.2395	82545286	85995976	93	-1.9224
10	82874199	85592069	175	-0.1331	82874199	85592069	70	-1.0514	82545286	85995976	93	-1.9224
10	85601611	85995976	175	-0.1331	85601611	86687060	42	-0.3879	82545286	85995976	93	-1.9224
10	86060629	86314055	175	-0.1331	85601611	86687060	42	-0.3879	86060629	86314055	17	0.1887
10	86327983	86687060	175	-0.1331	85601611	86687060	42	-0.3879	86327983	87581198	31	-1.5849
10	86742047	87581198	175	-0.1331	86742047	87918743	26	-1.118	86327983	87581198	31	-1.5849
10	87584061	87918743	175	-0.1331	86742047	87918743	26	-1.118	87584061	100316894	646	-0.0777
10	87935559	88203497	175	-0.1331	87935559	89745445	114	-0.2124	87584061	100316894	646	-0.0777
10	88210006	89745445	560	-0.0421	87935559	89745445	114	-0.2124	87584061	100316894	646	-0.0777
10	89752267	93554456	560	-0.0421	89752267	93554456	77	-0.663	87584061	100316894	646	-0.0777
10	93567677	100274465	560	-0.0421	93567677	100316894	448	-0.2297	87584061	100316894	646	-0.0777
10	100322396	101104013	12	-0.295	100322396	101268932	31	-1.0498	100322396	101104013	24	-2.1828
10	101107201	101140888	12	-0.295	100322396	101268932	31	-1.0498	101107201	106037134	424	-0.2493
10	101152467	101268932	415	-0.0328	100322396	101268932	31	-1.0498	101107201	106037134	424	-0.2493
10	101335907	106037134	415	-0.0328	101335907	106098759	418	-0.2514	101107201	106037134	424	-0.2493
10	106168575	111228654	114	-0.1637	106164460	111293341	142	-0.9695	106098759	111614162	148	-2.5159
10	111250371	111293341	651	-0.0506	106164460	111293341	142	-0.9695	106098759	111614162	148	-2.5159
10	111487901	111614162	651	-0.0506	111487901	116756818	225	-0.2373	106098759	111614162	148	-2.5159
10	111668953	113016046	651	-0.0506	111487901	116756818	225	-0.2373	111668953	113016046	68	-0.2927
10	113017029	113812933	651	-0.0506	111487901	116756818	225	-0.2373	113017029	113812933	18	-2.2101
10	113883047	116756818	651	-0.0506	111487901	116756818	225	-0.2373	113883047	116816746	137	-0.2862
10	116776126	116816746	651	-0.0506	116776126	118288118	56	-1.0618	113883047	116816746	137	-0.2862
10	116820337	118288118	651	-0.0506	116776126	118288118	56	-1.0618	116820337	118288118	53	-2.3213
10	118303414	121888215	651	-0.0506	118303414	135450221	686	-0.3213	118303414	121888215	202	-0.1454
10	121916960	122490398	651	-0.0506	118303414	135450221	686	-0.3213	121916960	122490398	19	-2.1684
10	122539248	124311496	651	-0.0506	118303414	135450221	686	-0.3213	122539248	124311496	111	-0.1594
10	124388076	124625511	651	-0.0506	118303414	135450221	686	-0.3213	124388076	124625511	9	-2.242
10	124692910	125313797	651	-0.0506	118303414	135450221	686	-0.3213	124692910	125313797	14	-0.1798
10	125349114	125709604	651	-0.0506	118303414	135450221	686	-0.3213	125349114	125709604	18	-1.7528
10	125783452	127687861	651	-0.0506	118303414	135450221	686	-0.3213	125783452	127687861	95	-0.1414
10	127709486	128557532	651	-0.0506	118303414	135450221	686	-0.3213	127709486	128557532	33	-1.5551
10	128589644	129251652	651	-0.0506	118303414	135450221	686	-0.3213	128589644	130118118	52	-0.3721
10	129345469	130118118	132	-0.1112	118303414	135450221	686	-0.3213	128589644	130118118	52	-0.3721
10	130183870	131322948	132	-0.1112	118303414	135450221	686	-0.3213	130183870	131322948	18	-2.4974
10	131390119	131722603	132	-0.1112	118303414	135450221	686	-0.3213	131390119	131722603	10	0.2959
10	131747489	131828858	132	-0.1112	118303414	135450221	686	-0.3213	131747489	131828858	3	-1.9874
10	131831116	132021575	132	-0.1112	118303414	135450221	686	-0.3213	131831116	132021575	18	0.2925
10	132077959	133441183	132	-0.1112	118303414	135450221	686	-0.3213	132077959	133441183	34	-1.1601
10	133449300	134986216	132	-0.1112	118303414	135450221	686	-0.3213	133449300	135450221	50	0.2153
10	135029900	135274018	33	-0.0089	118303414	135450221	686	-0.3213	133449300	135450221	50	0.2153
11	201303	427450	22	-0.0108	162894	6627327	325	-0.2795	162894	4226506	244	-0.0082
11	440693	440810	2	-0.6833	162894	6627327	325	-0.2795	162894	4226506	244	-0.0082
11	447700	4226506	248	-0.0372	162894	6627327	325	-0.2795	162894	4226506	244	-0.0082
11	4338136	4714670	248	-0.0372	162894	6627327	325	-0.2795	4338136	5156192	18	-1.7029
11	4747955	5156192	14	-0.2726	162894	6627327	325	-0.2795	4338136	5156192	18	-1.7029
11	5169115	5613865	14	-0.2726	162894	6627327	325	-0.2795	5169115	5721957	25	-0.2257
11	5615533	5721957	518	-0.0405	162894	6627327	325	-0.2795	5169115	5721957	25	-0.2257
11	5724708	6175732	518	-0.0405	162894	6627327	325	-0.2795	5724708	6175732	7	-1.9194
11	6257093	6627327	518	-0.0405	162894	6627327	325	-0.2795	6257093	6730846	35	0.0278
11	6705707	6730846	518	-0.0405	6705707	8555746	52	-1.1467	6257093	6730846	35	0.0278
11	6735367	8096386	518	-0.0405	6705707	8555746	52	-1.1467	6735367	8096386	36	-1.3348
11	8150394	8555746	518	-0.0405	6705707	8555746	52	-1.1467	8150394	15233740	321	-0.0388
11	8568854	11013744	518	-0.0405	8568854	11013744	205	-0.1809	8150394	15233740	321	-0.0388
11	11034619	11748157	518	-0.0405	11034619	11748157	13	-1.2489	8150394	15233740	321	-0.0388
11	11807293	15233740	518	-0.0405	11807293	20171225	298	-0.1572	8150394	15233740	321	-0.0388
11	15316633	16570809	518	-0.0405	11807293	20171225	298	-0.1572	15316633	16570809	23	-1.5596
11	16573243	20026884	518	-0.0405	11807293	20171225	298	-0.1572	16573243	20026884	174	-0.1186
11	20028145	20171225	518	-0.0405	11807293	20171225	298	-0.1572	20028145	20234943	14	-1.7993
11	20204193	20234943	518	-0.0405	20204193	26874078	153	-0.8701	20028145	20234943	14	-1.7993
11	20254799	20609721	518	-0.0405	20204193	26874078	153	-0.8701	20254799	20609821	11	-0.2862
11	20667182	26665021	109	-0.1548	20204193	26874078	153	-0.8701	20640407	27275650	148	-1.8678
11	26746280	26874078	305	-0.079	20204193	26874078	153	-0.8701	20640407	27275650	148	-1.8678
11	26894817	27275650	305	-0.079	26894817	28375396	46	-0.2694	20640407	27275650	148	-1.8678
11	27307993	28375396	305	-0.079	26894817	28375396	46	-0.2694	27307993	29665765	51	0.1574
11	28617739	29665765	305	-0.079	28617739	32583240	117	-0.9215	27307993	29665765	51	0.1574
11	29748491	31121358	305	-0.079	28617739	32583240	117	-0.9215	29748491	31121358	33	-1.6656
11	31155343	32583240	305	-0.079	28617739	32583240	117	-0.9215	31155343	36935826	260	-0.1194
11	32591770	36659436	305	-0.079	32591770	37224054	194	-0.3481	31155343	36935826	260	-0.1194
11	36684292	36935826	136	-0.1554	32591770	37224054	194	-0.3481	31155343	36935826	260	-0.1194
11	37025494	37224054	136	-0.1554	32591770	37224054	194	-0.3481	37025494	43334581	181	-1.9489
11	37384626	43234619	136	-0.1554	37384626	43301254	174	-0.9149	37025494	43334581	181	-1.9489
11	43252148	43301254	48	-0.0458	37384626	43301254	174	-0.9149	37025494	43334581	181	-1.9489
11	43305456	43334581	48	-0.0458	43305456	45355849	74	-0.3362	37025494	43334581	181	-1.9489
11	43383623	44312949	48	-0.0458	43305456	45355849	74	-0.3362	43383623	48237150	387	-0.1105
11	44423935	45355849	47	-0.1649	43305456	45355849	74	-0.3362	43383623	48237150	387	-0.1105
11	45358650	45769153	47	-0.1649	45358650	45769153	13	-1.2226	43383623	48237150	387	-0.1105
11	45787929	45871545	47	-0.1649	45787929	47881076	261	-0.2074	43383623	48237150	387	-0.1105
11	45945257	47881076	290	-0.0396	45787929	47881076	261	-0.2074	43383623	48237150	387	-0.1105
11	47887939	48237150	290	-0.0396	47887939	51476568	100	-0.6583	43383623	48237150	387	-0.1105
11	48247113	50276359	290	-0.0396	47887939	51476568	100	-0.6583	48247113	51476568	57	-1.9133
11	55305519	56014463	19	-0.1511	55078389	57422201	70	-0.7571	55078389	56977276	41	-2.1575
11	56040212	56145930	3	-0.5144	55078389	57422201	70	-0.7571	55078389	56977276	41	-2.1575
11	56169961	56977276	1903	-0.0457	55078389	57422201	70	-0.7571	55078389	56977276	41	-2.1575
11	57030034	57422201	1903	-0.0457	55078389	57422201	70	-0.7571	57030034	57654614	63	-0.2088
11	57430960	57654614	1903	-0.0457	57430960	96156735	2033	-0.2973	57030034	57654614	63	-0.2088
11	57698886	57989141	1903	-0.0457	57430960	96156735	2033	-0.2973	57698886	57989141	14	-1.4956
11	58175689	78822514	1903	-0.0457	57430960	96156735	2033	-0.2973	58175689	78822514	1518	-0.0046
11	79009484	82160839	1903	-0.0457	57430960	96156735	2033	-0.2973	79009484	82160839	56	-2.1005
11	82183511	83245910	1903	-0.0457	57430960	96156735	2033	-0.2973	82183511	83245910	33	-0.0829
11	83248782	85270288	1903	-0.0457	57430960	96156735	2033	-0.2973	83248782	85270288	55	-1.7332
11	85316946	88843906	1903	-0.0457	57430960	96156735	2033	-0.2973	85316946	88843906	122	0.0047
11	88933336	89306631	1903	-0.0457	57430960	96156735	2033	-0.2973	88933336	89306631	8	-2.171
11	89311422	90023592	1903	-0.0457	57430960	96156735	2033	-0.2973	89311422	90023592	28	-0.6363
11	90074711	92637142	1903	-0.0457	57430960	96156735	2033	-0.2973	90074711	92637142	51	-1.5978
11	92669233	93664294	1903	-0.0457	57430960	96156735	2033	-0.2973	92669233	93664294	39	0.103
11	93730354	93980892	1903	-0.0457	57430960	96156735	2033	-0.2973	93730354	93980892	5	-1.9831
11	94027019	95026693	1903	-0.0457	57430960	96156735	2033	-0.2973	94027019	95026693	26	-0.0379
11	95134131	95403200	1903	-0.0457	57430960	96156735	2033	-0.2973	95134131	95403200	4	-2.609
11	95435405	96156735	1903	-0.0457	57430960	96156735	2033	-0.2973	95435405	96156735	40	-0.1699
11	96219901	98112780	1903	-0.0457	96219901	99862123	112	-1.0279	96219901	100425247	121	-1.9179
11	98113773	99862123	70	-0.2053	96219901	99862123	112	-1.0279	96219901	100425247	121	-1.9179
11	99980082	100425247	70	-0.2053	99980082	100679229	26	-0.2327	96219901	100425247	121	-1.9179
11	100458016	100476519	70	-0.2053	99980082	100679229	26	-0.2327	100458016	100895063	19	0.1014
11	100540454	100679229	22	-0.003	99980082	100679229	26	-0.2327	100458016	100895063	19	0.1014
11	100873896	100895063	22	-0.003	100873896	101586859	17	-1.1823	100458016	100895063	19	0.1014
11	101018694	101226770	7	-0.2481	100873896	101586859	17	-1.1823	100992810	101226770	6	-1.9439
11	101274521	101376465	7	-0.2481	100873896	101586859	17	-1.1823	101274521	105934582	137	0.0249
11	101379855	101586859	57	-0.0297	100873896	101586859	17	-1.1823	101274521	105934582	137	0.0249
11	101590751	102981551	57	-0.0297	101590751	134939114	1361	-0.5262	101274521	105934582	137	0.0249
11	103013117	104702855	30	-0.2082	101590751	134939114	1361	-0.5262	101274521	105934582	137	0.0249
11	104774921	105934582	354	-0.0738	101590751	134939114	1361	-0.5262	101274521	105934582	137	0.0249
11	105938262	106918952	354	-0.0738	101590751	134939114	1361	-0.5262	105938262	106918952	25	-1.3438
11	106937488	110661701	354	-0.0738	101590751	134939114	1361	-0.5262	106937488	110661701	182	-0.1108
11	110705159	111135145	354	-0.0738	101590751	134939114	1361	-0.5262	110705159	111135145	15	-2.2968
11	111153856	111772080	354	-0.0738	101590751	134939114	1361	-0.5262	111153856	111772080	34	-0.2902
11	111798664	111802291	354	-0.0738	101590751	134939114	1361	-0.5262	111798664	111802291	3	1.9592
11	111802847	112390003	354	-0.0738	101590751	134939114	1361	-0.5262	111802847	112390003	36	0.0094
11	112402006	113459324	354	-0.0738	101590751	134939114	1361	-0.5262	112402006	113459324	20	-1.6273
11	113482089	114340304	354	-0.0738	101590751	134939114	1361	-0.5262	113482089	114340304	61	-0.3289
11	114346058	114756746	354	-0.0738	101590751	134939114	1361	-0.5262	114346058	116430107	48	-1.9695
11	114880911	115646202	17	-0.2653	101590751	134939114	1361	-0.5262	114346058	116430107	48	-1.9695
11	115950028	116430107	20	-0.1103	101590751	134939114	1361	-0.5262	114346058	116430107	48	-1.9695
11	116451546	116761762	20	-0.1103	101590751	134939114	1361	-0.5262	116451546	123526589	437	-0.0729
11	116795727	123526589	639	-0.0698	101590751	134939114	1361	-0.5262	116451546	123526589	437	-0.0729
11	123543068	124464273	639	-0.0698	101590751	134939114	1361	-0.5262	123543068	124464273	26	-1.5873
11	124475220	126289465	639	-0.0698	101590751	134939114	1361	-0.5262	124475220	126289465	92	-0.0284
11	126299957	127868987	639	-0.0698	101590751	134939114	1361	-0.5262	126299957	127868987	34	-1.5958
11	127881372	130394363	639	-0.0698	101590751	134939114	1361	-0.5262	127881372	130394363	111	0.0095
11	130491075	130990089	639	-0.0698	101590751	134939114	1361	-0.5262	130491075	133987196	88	-1.8335
11	131025010	133486971	37	-0.2319	101590751	134939114	1361	-0.5262	130491075	133987196	88	-1.8335
11	133733623	133987196	36	-0.108	101590751	134939114	1361	-0.5262	130491075	133987196	88	-1.8335
11	134017273	134242371	36	-0.108	101590751	134939114	1361	-0.5262	134017273	134242371	11	0.2744
11	134316586	134939058	36	-0.108	101590751	134939114	1361	-0.5262	134316586	134939114	10	-1.7322
12	200659	2120241	451	-0.0449	164714	8670466	618	-0.3496	164714	2120241	172	-0.1025
12	2130770	2189691	451	-0.0449	164714	8670466	618	-0.3496	2130770	2189691	3	-3.0403
12	2190661	3993107	451	-0.0449	164714	8670466	618	-0.3496	2190661	3993107	96	-0.227
12	3999821	4331156	451	-0.0449	164714	8670466	618	-0.3496	3999821	4331156	33	-1.5424
12	4393994	7866469	451	-0.0449	164714	8670466	618	-0.3496	4393994	16784090	700	-0.137
12	7868110	8670466	177	-0.1204	164714	8670466	618	-0.3496	4393994	16784090	700	-0.137
12	8694063	8905072	177	-0.1204	8694063	8905072	21	-1.1766	4393994	16784090	700	-0.137
12	8922661	10364556	177	-0.1204	8922661	16338824	355	-0.2614	4393994	16784090	700	-0.137
12	10368689	16338824	282	-0.0235	8922661	16338824	355	-0.2614	4393994	16784090	700	-0.137
12	16357315	16707672	282	-0.0235	16357315	18868428	68	-0.7552	4393994	16784090	700	-0.137
12	16767129	16784090	22	-0.1764	16357315	18868428	68	-0.7552	4393994	16784090	700	-0.137
12	16792689	18378944	22	-0.1764	16357315	18868428	68	-0.7552	16792689	18613432	52	-1.1222
12	18401225	18613432	77	-0.0181	16357315	18868428	68	-0.7552	16792689	18613432	52	-1.1222
12	18678250	18868428	77	-0.0181	16357315	18868428	68	-0.7552	18678250	22892506	167	-0.1453
12	18953673	19153549	77	-0.0181	18953673	19153549	4	0.1038	18678250	22892506	167	-0.1453
12	19154498	19231379	77	-0.0181	19154498	19231379	6	-0.6457	18678250	22892506	167	-0.1453
12	19243112	19677102	77	-0.0181	19243112	19993094	68	-0.1264	18678250	22892506	167	-0.1453
12	19678173	19993094	226	-0.1271	19243112	19993094	68	-0.1264	18678250	22892506	167	-0.1453
12	20055714	22892506	226	-0.1271	20055714	26258478	213	-0.9428	18678250	22892506	167	-0.1453
12	22987780	25252858	226	-0.1271	20055714	26258478	213	-0.9428	22987780	25252858	74	-1.9176
12	25266328	26258478	226	-0.1271	20055714	26258478	213	-0.9428	25266328	29875778	189	-0.1474
12	26264337	26968746	226	-0.1271	26264337	33090667	396	-0.271	25266328	29875778	189	-0.1474
12	26994873	29525588	88	-0.0176	26264337	33090667	396	-0.271	25266328	29875778	189	-0.1474
12	29557675	29875778	30	-0.1418	26264337	33090667	396	-0.271	25266328	29875778	189	-0.1474
12	29953741	30374656	30	-0.1418	26264337	33090667	396	-0.271	29953741	30374656	11	-1.7097
12	30398201	30865668	30	-0.1418	26264337	33090667	396	-0.271	30398201	33078784	251	-0.0396
12	30875553	33078784	171	-0.0134	26264337	33090667	396	-0.271	30398201	33078784	251	-0.0396
12	33101935	33368657	171	-0.0134	33101935	34409543	36	-0.9192	33090667	34113157	24	-2.0538
12	33471607	34113157	33	-0.1371	33101935	34409543	36	-0.9192	33090667	34113157	24	-2.0538
12	34182776	34409543	33	-0.1371	33101935	34409543	36	-0.9192	34182776	34409543	13	-0.4503
12	37949574	45585659	1795	-0.0573	37908243	45585659	233	-0.6579	37908243	54962504	1009	-0.0064
12	45587626	54702885	1795	-0.0573	45587626	54702885	748	-0.2176	37908243	54962504	1009	-0.0064
12	54710601	54962504	1795	-0.0573	54710601	56039859	50	-0.8824	37908243	54962504	1009	-0.0064
12	55023333	56039859	1795	-0.0573	54710601	56039859	50	-0.8824	55023333	56039859	22	-1.7327
12	56047444	61491135	1795	-0.0573	56047444	61491135	342	-0.2811	56047444	66877732	567	-0.0241
12	61565580	62614809	1795	-0.0573	61565580	62614809	25	-1.242	56047444	66877732	567	-0.0241
12	62630138	66877732	1795	-0.0573	62630138	72362987	419	-0.3174	56047444	66877732	567	-0.0241
12	66922007	67590702	1795	-0.0573	62630138	72362987	419	-0.3174	66922007	67590702	18	-2.1945
12	67679880	72362987	1795	-0.0573	62630138	72362987	419	-0.3174	67679880	96941056	1055	0.0559
12	72381556	74877720	1795	-0.0573	72381556	74877720	40	-1.2864	67679880	96941056	1055	0.0559
12	74930555	83609604	1795	-0.0573	74930555	96808153	793	-0.4135	67679880	96941056	1055	0.0559
12	83635536	87662691	78	-0.1669	74930555	96808153	793	-0.4135	67679880	96941056	1055	0.0559
12	87720375	96808153	980	-0.0612	74930555	96808153	793	-0.4135	67679880	96941056	1055	0.0559
12	96829514	96941056	980	-0.0612	96829514	98836820	72	-0.8967	67679880	96941056	1055	0.0559
12	96946214	97165354	980	-0.0612	96829514	98836820	72	-0.8967	96946214	97165354	9	-2.3515
12	97171220	97466628	980	-0.0612	96829514	98836820	72	-0.8967	97171220	97466628	8	-0.0241
12	97468159	98602265	980	-0.0612	96829514	98836820	72	-0.8967	97468159	98602265	23	-2.1143
12	98643872	98836820	980	-0.0612	96829514	98836820	72	-0.8967	98643872	99146129	54	-0.1535
12	98853470	99146129	980	-0.0612	98853470	103649755	242	-0.4836	98643872	99146129	54	-0.1535
12	99152651	100349195	980	-0.0612	98853470	103649755	242	-0.4836	99152651	100349195	39	-1.6496
12	100352931	102731549	980	-0.0612	98853470	103649755	242	-0.4836	100352931	102731549	143	-0.123
12	102798628	103649755	980	-0.0612	98853470	103649755	242	-0.4836	102798628	103789206	21	-1.8089
12	103671490	103789206	980	-0.0612	103671490	103789206	4	-2.3638	102798628	103789206	21	-1.8089
12	103793239	108204064	980	-0.0612	103793239	112935881	604	-0.3619	103793239	108204064	186	-0.2331
12	108222766	108835018	980	-0.0612	103793239	112935881	604	-0.3619	108222766	108835018	14	-1.6674
12	108868951	111255239	980	-0.0612	103793239	112935881	604	-0.3619	108868951	113049335	409	0.0097
12	111268025	111828361	33	-0.2014	103793239	112935881	604	-0.3619	108868951	113049335	409	0.0097
12	111828960	112935881	1314	-0.0412	103793239	112935881	604	-0.3619	108868951	113049335	409	0.0097
12	112958869	113049335	1314	-0.0412	112958869	113519058	23	-1.0157	108868951	113049335	409	0.0097
12	113054043	113499598	1314	-0.0412	112958869	113519058	23	-1.0157	113054043	113499598	17	-1.8823
12	113541335	118848494	1314	-0.0412	113541335	118882388	312	-0.2687	113519058	118848494	311	-0.1397
12	118870485	118882388	1314	-0.0412	113541335	118882388	312	-0.2687	118870485	119059351	12	-1.0206
12	118890579	119059351	1314	-0.0412	118890579	120023946	55	-0.808	118870485	119059351	12	-1.0206
12	119066254	119505437	1314	-0.0412	118890579	120023946	55	-0.808	119066254	119505437	15	-2.6364
12	119533689	120023946	1314	-0.0412	118890579	120023946	55	-0.808	119533689	120034389	31	-1.1634
12	120049891	123283551	1314	-0.0412	120034389	125727945	748	-0.23	120049891	123283551	510	0.0212
12	123289524	123290154	1314	-0.0412	120034389	125727945	748	-0.23	123289524	123290154	2	-3.7828
12	123296293	125727945	1314	-0.0412	120034389	125727945	748	-0.23	123296293	125783144	239	-0.1221
12	125757941	125783144	1314	-0.0412	125757941	131240576	251	-0.7838	123296293	125783144	239	-0.1221
12	125786349	126038688	1314	-0.0412	125757941	131240576	251	-0.7838	125786349	127356475	49	-1.7949
12	126148380	127356475	212	-0.1241	125757941	131240576	251	-0.7838	125786349	127356475	49	-1.7949
12	127364306	127719998	212	-0.1241	125757941	131240576	251	-0.7838	127364306	127719998	16	0.1066
12	127752544	129166291	212	-0.1241	125757941	131240576	251	-0.7838	127752544	129166291	69	-1.8168
12	129230136	129315934	212	-0.1241	125757941	131240576	251	-0.7838	129230136	129315934	9	0.1815
12	129318977	131189044	212	-0.1241	125757941	131240576	251	-0.7838	129318977	131189044	102	-1.9397
12	131236878	131240576	212	-0.1241	125757941	131240576	251	-0.7838	131236878	133431932	138	-0.2944
12	131275995	132180738	212	-0.1241	131275995	133813968	192	-0.36	131236878	133431932	138	-0.2944
12	132210748	133431932	148	-0.0089	131275995	133813968	192	-0.36	131236878	133431932	138	-0.2944
12	133436029	133813300	148	-0.0089	131275995	133813968	192	-0.36	133436029	133813968	56	-1.759
13	19402378	20077973	248	-0.0537	19138503	23327446	287	-0.8227	19138503	20077973	34	-1.7068
13	20112453	22151968	248	-0.0537	19138503	23327446	287	-0.8227	20112453	25881443	411	-0.0843
13	22160546	23327446	83	-0.1477	19138503	23327446	287	-0.8227	20112453	25881443	411	-0.0843
13	23333774	23974548	83	-0.1477	23333774	24072343	65	-1.7271	20112453	25881443	411	-0.0843
13	23986117	24072343	85	-0.0425	23333774	24072343	65	-1.7271	20112453	25881443	411	-0.0843
13	24081867	25618666	85	-0.0425	24081867	53327321	1273	-0.8973	20112453	25881443	411	-0.0843
13	25668705	25881443	53	-0.1809	24081867	53327321	1273	-0.8973	20112453	25881443	411	-0.0843
13	25932044	26702629	53	-0.1809	24081867	53327321	1273	-0.8973	25932044	26702629	21	-1.6047
13	26723649	26742867	53	-0.1809	24081867	53327321	1273	-0.8973	26723649	27120773	21	-0.0123
13	26746684	27120773	332	-0.0636	24081867	53327321	1273	-0.8973	26723649	27120773	21	-0.0123
13	27137716	27449619	332	-0.0636	24081867	53327321	1273	-0.8973	27137716	27449619	16	-1.9807
13	27470908	29373968	332	-0.0636	24081867	53327321	1273	-0.8973	27470908	29373968	126	0.1212
13	29380182	29965319	332	-0.0636	24081867	53327321	1273	-0.8973	29380182	29965319	17	-1.7299
13	29985061	31953334	332	-0.0636	24081867	53327321	1273	-0.8973	29985061	31953334	92	-0.1642
13	31985121	32269919	332	-0.0636	24081867	53327321	1273	-0.8973	31985121	32269919	10	-1.8619
13	32308504	33421292	332	-0.0636	24081867	53327321	1273	-0.8973	32308504	36275768	167	-0.122
13	33427818	36275768	200	-0.1568	24081867	53327321	1273	-0.8973	32308504	36275768	167	-0.122
13	36353245	37342504	200	-0.1568	24081867	53327321	1273	-0.8973	36353245	37342504	42	-2.0399
13	37407990	37623800	200	-0.1568	24081867	53327321	1273	-0.8973	37407990	37623800	16	-0.1974
13	37675768	40207805	200	-0.1568	24081867	53327321	1273	-0.8973	37675768	40207805	66	-1.8146
13	40211445	40865792	200	-0.1568	24081867	53327321	1273	-0.8973	40211445	43007472	140	-0.0361
13	40906626	43007472	604	-0.0457	24081867	53327321	1273	-0.8973	40211445	43007472	140	-0.0361
13	43047472	44362688	604	-0.0457	24081867	53327321	1273	-0.8973	43047472	44362688	47	-1.1877
13	44368240	47548756	604	-0.0457	24081867	53327321	1273	-0.8973	44368240	47548756	157	-0.096
13	47716883	48333555	604	-0.0457	24081867	53327321	1273	-0.8973	47716883	48333555	15	-2.0771
13	48419991	53327321	604	-0.0457	24081867	53327321	1273	-0.8973	48419991	53403466	231	-0.1129
13	53351843	53403466	604	-0.0457	53351843	60130463	184	-1.6696	48419991	53403466	231	-0.1129
13	53413846	53481186	604	-0.0457	53351843	60130463	184	-1.6696	53413846	60130463	180	-1.9417
13	53494958	60109294	154	-0.1787	53351843	60130463	184	-1.6696	53413846	60130463	180	-1.9417
13	60130253	60130463	33	-0.0572	53351843	60130463	184	-1.6696	53413846	60130463	180	-1.9417
13	60244809	61155906	33	-0.0572	60244809	61155906	32	-0.4391	60244809	61155906	32	-0.2003
13	61178499	62429878	287	-0.2052	61164753	71968142	286	-1.7377	61164753	62429878	34	-1.4388
13	62553174	67843027	287	-0.2052	61164753	71968142	286	-1.7377	62553174	67843027	150	0.195
13	67887142	71317017	287	-0.2052	61164753	71968142	286	-1.7377	67887142	71512046	96	-1.2012
13	71335956	71512046	51	-0.0365	61164753	71968142	286	-1.7377	67887142	71512046	96	-1.2012
13	71699281	71803515	51	-0.0365	61164753	71968142	286	-1.7377	71699281	71803515	3	1.4269
13	71831291	71968142	51	-0.0365	61164753	71968142	286	-1.7377	71831291	73133786	31	-1.4597
13	71987338	72390141	51	-0.0365	71987338	72390141	16	-0.2188	71831291	73133786	31	-1.4597
13	72462303	72566429	51	-0.0365	72462303	73242221	15	-1.5987	71831291	73133786	31	-1.4597
13	72574428	73133786	8	-0.3304	72462303	73242221	15	-1.5987	71831291	73133786	31	-1.4597
13	73180311	73220298	8	-0.3304	72462303	73242221	15	-1.5987	73180311	74767208	77	-0.0016
13	73294950	74354609	74	0.0041	73294950	81013220	278	-0.8056	73180311	74767208	77	-0.0016
13	74360738	74767208	37	-0.1849	73294950	81013220	278	-0.8056	73180311	74767208	77	-0.0016
13	74789024	75773581	37	-0.1849	73294950	81013220	278	-0.8056	74789024	75792898	20	-1.4674
13	75808386	76204528	28	-0.049	73294950	81013220	278	-0.8056	75799317	76584639	31	0.112
13	76206999	76584639	31	-0.2249	73294950	81013220	278	-0.8056	75799317	76584639	31	0.112
13	76645810	77335822	31	-0.2249	73294950	81013220	278	-0.8056	76645810	77335822	21	-1.2303
13	77373792	77553710	31	-0.2249	73294950	81013220	278	-0.8056	77373792	78116460	28	-0.3133
13	77577160	78116460	34	-0.0068	73294950	81013220	278	-0.8056	77373792	78116460	28	-0.3133
13	78117311	78387245	34	-0.0068	73294950	81013220	278	-0.8056	78117311	91658056	410	-1.269
13	78400938	79778730	33	-0.2338	73294950	81013220	278	-0.8056	78117311	91658056	410	-1.269
13	79858840	81013220	47	-0.0136	73294950	81013220	278	-0.8056	78117311	91658056	410	-1.269
13	81029642	81131829	47	-0.0136	81029642	95218798	395	-1.7193	78117311	91658056	410	-1.269
13	81160133	81669857	15	-0.2067	81029642	95218798	395	-1.7193	78117311	91658056	410	-1.269
13	81670371	82065422	16	-0.0483	81029642	95218798	395	-1.7193	78117311	91658056	410	-1.269
13	82132563	83984235	37	-0.2408	81029642	95218798	395	-1.7193	78117311	91658056	410	-1.269
13	83990724	84247888	11	-0.423	81029642	95218798	395	-1.7193	78117311	91658056	410	-1.269
13	84275202	91658056	405	-0.1768	81029642	95218798	395	-1.7193	78117311	91658056	410	-1.269
13	91670290	92703547	405	-0.1768	81029642	95218798	395	-1.7193	91670290	92703547	27	-2.3193
13	92706209	95218798	405	-0.1768	81029642	95218798	395	-1.7193	92706209	95638512	84	-1.4354
13	95241661	95638512	405	-0.1768	95241661	96636792	69	-0.8776	92706209	95638512	84	-1.4354
13	95653243	96307731	405	-0.1768	95241661	96636792	69	-0.8776	95653243	96810831	51	0.0641
13	96310253	96636792	16	0.0125	95241661	96636792	69	-0.8776	95653243	96810831	51	0.0641
13	96644341	96681117	16	0.0125	96644341	97460044	22	-1.8365	95653243	96810831	51	0.0641
13	96706895	96810831	78	-0.1202	96644341	97460044	22	-1.8365	95653243	96810831	51	0.0641
13	96815576	97460044	78	-0.1202	96644341	97460044	22	-1.8365	96815576	97484133	19	-2.3944
13	97495107	98114141	78	-0.1202	97484133	98114141	20	-0.4078	97495107	101346725	238	0.0574
13	98121480	98608310	78	-0.1202	98121480	98608310	21	-1.4861	97495107	101346725	238	0.0574
13	98611912	98802301	78	-0.1202	98611912	101297161	195	-0.6539	97495107	101346725	238	0.0574
13	98818969	101297161	175	-0.0186	98611912	101297161	195	-0.6539	97495107	101346725	238	0.0574
13	101307368	101322921	175	-0.0186	101307368	103097782	47	-1.703	97495107	101346725	238	0.0574
13	101330535	101346725	42	-0.1928	101307368	103097782	47	-1.703	97495107	101346725	238	0.0574
13	101424255	103097782	42	-0.1928	101307368	103097782	47	-1.703	101424255	103126344	47	-1.8491
13	103102841	103126344	42	-0.1928	103102841	103526964	22	-0.5679	101424255	103126344	47	-1.8491
13	103193715	103246635	42	-0.1928	103102841	103526964	22	-0.5679	103193715	103526964	19	0.0169
13	103263744	103526964	25	-0.0151	103102841	103526964	22	-0.5679	103193715	103526964	19	0.0169
13	103604951	103637619	25	-0.0151	103604951	106088754	56	-1.6531	103604951	104341218	18	-1.7099
13	103724225	104341218	77	-0.2045	103604951	106088754	56	-1.6531	103604951	104341218	18	-1.7099
13	104348810	106088754	77	-0.2045	103604951	106088754	56	-1.6531	104348810	107389961	77	-0.0925
13	106097438	106239614	77	-0.2045	106097438	107201189	35	-0.4518	104348810	107389961	77	-0.0925
13	106248896	107201189	40	-0.0132	106097438	107201189	35	-0.4518	104348810	107389961	77	-0.0925
13	107345606	107389961	40	-0.0132	107345606	109902971	79	-1.4165	104348810	107389961	77	-0.0925
13	107443975	107474761	40	-0.0132	107345606	109902971	79	-1.4165	107443975	109445558	65	-1.5765
13	107490357	109445558	91	-0.1427	107345606	109902971	79	-1.4165	107443975	109445558	65	-1.5765
13	109451146	109902971	91	-0.1427	107345606	109902971	79	-1.4165	109451146	112094053	81	0.0898
13	109915177	110541064	91	-0.1427	109915177	110541064	22	-0.4449	109451146	112094053	81	0.0898
13	110569034	111028101	91	-0.1427	110569034	111028101	10	-2.0869	109451146	112094053	81	0.0898
13	111104468	112094053	169	-0.0342	111036055	115098018	141	-0.8411	109451146	112094053	81	0.0898
13	112131011	113059389	169	-0.0342	111036055	115098018	141	-0.8411	112131011	113059389	12	-1.845
13	113130803	115093261	169	-0.0342	111036055	115098018	141	-0.8411	113130803	115098018	90	-0.1662
14	19100807	20707777	284	-0.048	19073224	25772203	363	-0.1312	19073224	20707777	38	-1.5274
14	20729339	22036272	284	-0.048	19073224	25772203	363	-0.1312	20729339	22036272	115	-0.0099
14	22043309	22988381	284	-0.048	19073224	25772203	363	-0.1312	22043309	22988381	31	-1.3976
14	22996865	24913222	284	-0.048	19073224	25772203	363	-0.1312	22996865	24913222	156	-0.0553
14	24959619	25613831	284	-0.048	19073224	25772203	363	-0.1312	24959619	30984006	146	-2.0613
14	25633452	25772203	99	-0.173	19073224	25772203	363	-0.1312	24959619	30984006	146	-2.0613
14	25773800	30672131	99	-0.173	25773800	31027211	125	-0.6591	24959619	30984006	146	-2.0613
14	30766691	30984006	326	-0.026	25773800	31027211	125	-0.6591	24959619	30984006	146	-2.0613
14	31018904	31027211	326	-0.026	25773800	31027211	125	-0.6591	31018904	33280369	142	-0.0601
14	31050832	33280369	326	-0.026	31050832	38232182	431	-0.1676	31018904	33280369	142	-0.0601
14	33307262	34254565	326	-0.026	31050832	38232182	431	-0.1676	33307262	34254565	21	-2.2529
14	34258887	36357152	326	-0.026	31050832	38232182	431	-0.1676	34258887	38392570	275	-0.0045
14	36359211	37653967	32	-0.1847	31050832	38232182	431	-0.1676	34258887	38392570	275	-0.0045
14	37665889	38232182	67	-0.0687	31050832	38232182	431	-0.1676	34258887	38392570	275	-0.0045
14	38245348	38392570	67	-0.0687	38245348	39409622	32	-0.7384	34258887	38392570	275	-0.0045
14	38456046	38479323	67	-0.0687	38245348	39409622	32	-0.7384	38456046	38479323	2	-2.9672
14	38584736	39352796	67	-0.0687	38245348	39409622	32	-0.7384	38584736	39352796	22	-1.3037
14	39357964	39366108	67	-0.0687	38245348	39409622	32	-0.7384	39357964	39366108	2	-3.0149
14	39482183	39912380	67	-0.0687	39482183	39912380	48	-0.0738	39409622	39930956	50	-0.0227
14	40000498	40976251	67	-0.0687	39930956	49997577	220	-0.7185	40000498	45221612	102	-1.1992
14	41073113	44580401	61	-0.1881	39930956	49997577	220	-0.7185	40000498	45221612	102	-1.1992
14	44625462	45221612	38	-0.0095	39930956	49997577	220	-0.7185	40000498	45221612	102	-1.1992
14	45314173	45720164	38	-0.0095	39930956	49997577	220	-0.7185	45314173	45720164	28	-0.2247
14	45829865	49910595	77	-0.1563	39930956	49997577	220	-0.7185	45737402	49910595	86	-1.4511
14	49958546	49997577	77	-0.1563	39930956	49997577	220	-0.7185	49958546	56119209	362	-0.036
14	50027546	50063932	77	-0.1563	50027546	62412498	587	-0.2765	49958546	56119209	362	-0.036
14	50064374	56119209	1365	-0.0451	50027546	62412498	587	-0.2765	49958546	56119209	362	-0.036
14	56124556	58467406	1365	-0.0451	50027546	62412498	587	-0.2765	56124556	58467406	66	-0.8818
14	58560972	62412498	1365	-0.0451	50027546	62412498	587	-0.2765	58560972	62412498	162	-0.0574
14	62446524	63824112	1365	-0.0451	62446524	63824112	36	-0.9097	62446524	63824112	36	-1.8109
14	63843775	72227768	1365	-0.0451	63843775	72227768	479	-0.1473	63843775	78438008	975	-0.0718
14	72230523	72332365	1365	-0.0451	72230523	72332365	8	-1.054	63843775	78438008	975	-0.0718
14	72384822	72856898	1365	-0.0451	72384822	72856898	8	-0.3023	63843775	78438008	975	-0.0718
14	72873016	73197798	1365	-0.0451	72873016	73197798	13	-1.0824	63843775	78438008	975	-0.0718
14	73231289	76888646	1365	-0.0451	73231289	76888646	334	-0.1861	63843775	78438008	975	-0.0718
14	76899111	77209128	1365	-0.0451	76899111	77209128	22	-0.857	63843775	78438008	975	-0.0718
14	77256130	78438008	1365	-0.0451	77256130	78438008	111	-0.1369	63843775	78438008	975	-0.0718
14	78452745	79659206	1365	-0.0451	78452745	79659206	34	-0.9535	78452745	80729161	61	-2.0961
14	79735485	80729161	1365	-0.0451	79735485	81442348	51	-0.3805	78452745	80729161	61	-2.0961
14	80819804	81442348	1365	-0.0451	79735485	81442348	51	-0.3805	80819804	81991142	56	-0.2652
14	81451518	81617365	1365	-0.0451	81451518	81617365	11	-1.11	80819804	81991142	56	-0.2652
14	81640934	81958373	1365	-0.0451	81640934	81991142	21	-0.0715	80819804	81991142	56	-0.2652
14	82038605	88372809	126	-0.163	82005427	88372809	175	-1.0336	82005427	88815836	190	-2.0856
14	88393690	88735776	126	-0.163	88393690	93732192	360	-0.2379	82005427	88815836	190	-2.0856
14	88758974	88815836	929	-0.0468	88393690	93732192	360	-0.2379	82005427	88815836	190	-2.0856
14	88870985	93732192	929	-0.0468	88393690	93732192	360	-0.2379	88870985	96033895	439	-0.1665
14	93738552	96033895	929	-0.0468	93738552	96437542	111	-0.756	88870985	96033895	439	-0.1665
14	96045291	96432822	929	-0.0468	93738552	96437542	111	-0.756	96045291	96432822	16	-1.6566
14	96514955	96964828	929	-0.0468	96514955	96964828	28	-0.0026	96437542	97900527	61	-0.1259
14	96972333	97900527	929	-0.0468	96972333	100561302	107	-0.6753	96437542	97900527	61	-0.1259
14	98183245	99323791	929	-0.0468	96972333	100561302	107	-0.6753	98183245	99323791	25	-2.0089
14	99435538	100561302	929	-0.0468	96972333	100561302	107	-0.6753	99435538	106022983	513	-0.0225
14	100628607	106022983	929	-0.0468	100628607	107287357	480	-0.1977	99435538	106022983	513	-0.0225
14	106262549	107268113	929	-0.0468	100628607	107287357	480	-0.1977	106262549	107287357	17	-1.995
15	20065002	22587690	307	-0.1176	20046528	22677040	54	-0.7253	20046528	22587690	51	-1.9516
15	22661163	22677040	307	-0.1176	20046528	22677040	54	-0.7253	22661163	23846521	108	-0.2444
15	22682734	23695985	307	-0.1176	22682734	23695985	95	-0.1226	22661163	23846521	108	-0.2444
15	23699220	23846521	307	-0.1176	23699220	28295631	200	-0.7865	22661163	23846521	108	-0.2444
15	23850053	28295631	307	-0.1176	23699220	28295631	200	-0.7865	23850053	28319744	192	-1.8818
15	28318484	28319744	307	-0.1176	28318484	29077053	50	-0.1858	23850053	28319744	192	-1.8818
15	28321917	29077053	307	-0.1176	28318484	29077053	50	-0.1858	28321917	29532492	73	-0.1287
15	29100914	29532492	307	-0.1176	29100914	29926087	59	-0.703	28321917	29532492	73	-0.1287
15	29545739	29828732	307	-0.1176	29100914	29926087	59	-0.703	29545739	29828732	22	-1.5598
15	29834595	29926087	307	-0.1176	29100914	29926087	59	-0.703	29834595	33550158	197	-0.0309
15	29958150	29985347	307	-0.1176	29958150	33455247	175	-0.1851	29834595	33550158	197	-0.0309
15	29995373	33455247	1049	-0.0391	29958150	33455247	175	-0.1851	29834595	33550158	197	-0.0309
15	33457684	33550158	1049	-0.0391	33457684	34135445	34	-0.5449	29834595	33550158	197	-0.0309
15	33554087	34124419	1049	-0.0391	33457684	34135445	34	-0.5449	33554087	34124419	23	-1.5095
15	34141129	45812560	1049	-0.0391	34141129	45812560	825	-0.1868	34135445	46068107	847	-0.0627
15	45816172	46068107	1049	-0.0391	45816172	48547559	76	-0.8979	34135445	46068107	847	-0.0627
15	46113137	48547559	1049	-0.0391	45816172	48547559	76	-0.8979	46113137	48547559	55	-2.2156
15	48550482	52584028	1049	-0.0391	48550482	52584028	237	-0.3168	48550482	53064515	270	-0.1096
15	52627637	53040590	1049	-0.0391	52627637	56109914	162	-0.6667	48550482	53064515	270	-0.1096
15	53051808	53064515	27	-0.2152	52627637	56109914	162	-0.6667	48550482	53064515	270	-0.1096
15	53104595	55391045	27	-0.2152	52627637	56109914	162	-0.6667	53104595	55391045	53	-1.9419
15	55403542	55460900	27	-0.2152	52627637	56109914	162	-0.6667	55403542	60046781	257	-0.0465
15	55466179	56109914	353	-0.0316	52627637	56109914	162	-0.6667	55403542	60046781	257	-0.0465
15	56116828	59822682	353	-0.0316	56116828	59822682	168	-0.2078	55403542	60046781	257	-0.0465
15	59846817	60046781	353	-0.0316	59846817	60591090	41	-0.7554	55403542	60046781	257	-0.0465
15	60047677	60580612	353	-0.0316	59846817	60591090	41	-0.7554	60047677	60580612	27	-2.3523
15	60615314	60775214	353	-0.0316	60615314	60775214	16	-0.0808	60591090	60796670	19	-0.0741
15	60790182	60796670	353	-0.0316	60790182	61944084	34	-1.2324	60591090	60796670	19	-0.0741
15	60854727	61041945	353	-0.0316	60790182	61944084	34	-1.2324	60854727	62080462	38	-2.5264
15	61074144	61944084	27	-0.2109	60790182	61944084	34	-1.2324	60854727	62080462	38	-2.5264
15	61967645	62080462	27	-0.2109	61967645	83761748	1315	-0.308	60854727	62080462	38	-2.5264
15	62206692	74057777	646	-0.0304	61967645	83761748	1315	-0.308	62206692	81434118	1194	-0.0287
15	74061151	74253408	5	-0.4467	61967645	83761748	1315	-0.308	62206692	81434118	1194	-0.0287
15	74264306	81434118	544	-0.0419	61967645	83761748	1315	-0.308	62206692	81434118	1194	-0.0287
15	81455444	82171200	544	-0.0419	61967645	83761748	1315	-0.308	81455444	82171200	26	-1.3152
15	82220127	83761748	544	-0.0419	61967645	83761748	1315	-0.308	82220127	84432349	131	-0.3423
15	83774088	84432349	544	-0.0419	83774088	85135527	63	-1.1041	82220127	84432349	131	-0.3423
15	84440697	85106960	544	-0.0419	83774088	85135527	63	-1.1041	84440697	85106960	17	-1.6564
15	85118402	85135527	544	-0.0419	83774088	85135527	63	-1.1041	85118402	86394409	103	0.1114
15	85145277	86394409	544	-0.0419	85145277	86394409	99	-0.229	85118402	86394409	103	0.1114
15	86442356	88968087	49	-0.1704	86418146	89585970	98	-0.9078	86418146	88968087	56	-2.1674
15	88979742	89163630	49	-0.1704	86418146	89585970	98	-0.9078	88979742	91571514	250	-0.0026
15	89179786	89585970	285	-0.0347	86418146	89585970	98	-0.9078	88979742	91571514	250	-0.0026
15	89596291	91571514	285	-0.0347	89596291	93942065	336	-0.3092	88979742	91571514	250	-0.0026
15	91639221	92349137	285	-0.0347	89596291	93942065	336	-0.3092	91639221	92349137	18	-2.144
15	92355202	92798585	285	-0.0347	89596291	93942065	336	-0.3092	92355202	92798585	16	-0.2614
15	92803397	93240565	285	-0.0347	89596291	93942065	336	-0.3092	92803397	93240565	16	-1.9083
15	93265332	93604390	285	-0.0347	89596291	93942065	336	-0.3092	93265332	93685362	40	0.0542
15	93620965	93685362	144	-0.1351	89596291	93942065	336	-0.3092	93265332	93685362	40	0.0542
15	93687519	93942065	144	-0.1351	89596291	93942065	336	-0.3092	93687519	95722674	103	-1.4253
15	93951909	94561643	144	-0.1351	93951909	94561643	31	-1.0563	93687519	95722674	103	-1.4253
15	94563019	95103344	144	-0.1351	94563019	95103344	17	-0.2311	93687519	95722674	103	-1.4253
15	95139665	95722674	144	-0.1351	95139665	97762742	82	-1.1074	93687519	95722674	103	-1.4253
15	95722979	96929784	144	-0.1351	95139665	97762742	82	-1.1074	95722979	96929784	42	0.3159
15	96938656	97762742	144	-0.1351	95139665	97762742	82	-1.1074	96938656	97912195	24	-2.254
15	97935388	98578423	144	-0.1351	97912195	98734615	32	-0.1084	97935388	99120679	50	-1.0412
15	98629328	98734615	152	-0.0379	97912195	98734615	32	-0.1084	97935388	99120679	50	-1.0412
15	98769128	99120679	152	-0.0379	98769128	99174534	25	-0.9367	97935388	99120679	50	-1.0412
15	99123112	99174534	152	-0.0379	98769128	99174534	25	-0.9367	99123112	102471473	160	-0.1499
15	99178715	102359691	152	-0.0379	99178715	102471473	154	-0.3051	99123112	102471473	160	-0.1499
16	89487	4992744	764	-0.041	72304	5000692	593	-0.2974	72304	5177879	611	0.0623
16	4998543	5000692	210	-0.1487	72304	5000692	593	-0.2974	72304	5177879	611	0.0623
16	5004202	5177879	210	-0.1487	5004202	6542494	92	-0.8447	72304	5177879	611	0.0623
16	5191347	6203629	210	-0.1487	5004202	6542494	92	-0.8447	5191347	6203629	55	-2.2648
16	6216867	6542494	210	-0.1487	5004202	6542494	92	-0.8447	6216867	6955478	39	0.6448
16	6569626	6708334	210	-0.1487	6569626	6708334	10	0.0967	6216867	6955478	39	0.6448
16	6730356	6955478	210	-0.1487	6730356	8204037	72	-1.1848	6216867	6955478	39	0.6448
16	6977338	8204037	210	-0.1487	6730356	8204037	72	-1.1848	6977338	8587427	69	-2.3183
16	8218776	8330941	210	-0.1487	8218776	9242035	79	-0.3728	6977338	8587427	69	-2.3183
16	8371290	8587427	1943	-0.0605	8218776	9242035	79	-0.3728	6977338	8587427	69	-2.3183
16	8620426	9242035	1943	-0.0605	8218776	9242035	79	-0.3728	8620426	9302893	80	-0.0753
16	9245417	9302893	1943	-0.0605	9245417	10452563	66	-0.9647	8620426	9302893	80	-0.0753
16	9316402	10329351	1943	-0.0605	9245417	10452563	66	-0.9647	9316402	10329351	43	-2.1094
16	10340608	10452563	1943	-0.0605	9245417	10452563	66	-0.9647	10340608	12933466	226	-0.3268
16	10459964	12919287	1943	-0.0605	10459964	12919287	209	-0.3576	10340608	12933466	226	-0.3268
16	12924416	12933466	1943	-0.0605	12924416	14055833	61	-0.9846	10340608	12933466	226	-0.3268
16	12938892	13965404	1943	-0.0605	12924416	14055833	61	-0.9846	12938892	13965404	55	-2.0681
16	14047064	14055833	1943	-0.0605	12924416	14055833	61	-0.9846	14047064	16738686	219	-0.0556
16	14056847	14430731	1943	-0.0605	14056847	14430731	25	-0.1059	14047064	16738686	219	-0.0556
16	14439192	14507133	1943	-0.0605	14439192	14507133	15	-1.0106	14047064	16738686	219	-0.0556
16	14519574	16738686	1943	-0.0605	14519574	16918322	177	-0.2434	14047064	16738686	219	-0.0556
16	16917258	16918322	1943	-0.0605	14519574	16918322	177	-0.2434	16917258	17224422	24	-2.1119
16	16930463	17224422	1943	-0.0605	16930463	17224422	22	-0.9936	16917258	17224422	24	-2.1119
16	17302674	17542146	1943	-0.0605	17302674	17633477	30	-0.1757	17302674	17542146	24	-0.1027
16	17548486	17633477	1943	-0.0605	17302674	17633477	30	-0.1757	17548486	18146234	37	-1.5407
16	17649948	18146234	1943	-0.0605	17649948	18146234	31	-0.9686	17548486	18146234	37	-1.5407
16	18214291	19879313	1943	-0.0605	18214291	19879313	138	-0.2989	18214291	20128187	146	0.0616
16	19917985	20128187	1943	-0.0605	19917985	20716619	35	-0.9904	18214291	20128187	146	0.0616
16	20135876	20716619	1943	-0.0605	19917985	20716619	35	-0.9904	20135876	20763436	28	-1.6304
16	20785656	22835792	1943	-0.0605	20763436	23857855	209	-0.3246	20785656	22835792	127	-0.0169
16	22857522	23310473	1943	-0.0605	20763436	23857855	209	-0.3246	22857522	23310473	29	-1.1255
16	23318733	23817840	1943	-0.0605	20763436	23857855	209	-0.3246	23318733	23817840	49	-0.02
16	23822784	23857855	1943	-0.0605	20763436	23857855	209	-0.3246	23822784	24422068	25	-2.0433
16	23915908	24422068	1943	-0.0605	23915908	24627571	42	-1.2395	23822784	24422068	25	-2.0433
16	24422901	24627571	1943	-0.0605	23915908	24627571	42	-1.2395	24422901	25346184	94	-0.048
16	24636971	25288415	1943	-0.0605	24636971	25288415	72	-0.4117	24422901	25346184	94	-0.048
16	25299116	25346184	1943	-0.0605	25299116	26925833	59	-0.9663	24422901	25346184	94	-0.048
16	25349677	26925833	1943	-0.0605	25299116	26925833	59	-0.9663	25349677	27025844	65	-1.9273
16	26955840	27025844	1943	-0.0605	26955840	34857691	554	-0.3239	25349677	27025844	65	-1.9273
16	27065113	31458916	1943	-0.0605	26955840	34857691	554	-0.3239	27065113	31458916	456	-0.0176
16	31491618	34593132	1943	-0.0605	26955840	34857691	554	-0.3239	31491618	34593132	85	-1.5641
16	34787062	34857691	1943	-0.0605	26955840	34857691	554	-0.3239	34787062	34857691	5	0.2539
16	46510261	47657557	613	-0.0624	46472193	50749419	186	-0.4175	46472193	47657557	71	-0.0815
16	47791723	48091441	613	-0.0624	46472193	50749419	186	-0.4175	47791723	48091441	6	-1.9097
16	48154559	48567355	613	-0.0624	46472193	50749419	186	-0.4175	48154559	48567355	34	0.1221
16	48648086	49787079	613	-0.0624	46472193	50749419	186	-0.4175	48648086	49787079	22	-1.4862
16	49793234	50749419	613	-0.0624	46472193	50749419	186	-0.4175	49793234	50888850	56	0.1493
16	50768573	50888850	613	-0.0624	50768573	51683175	25	-1.1837	49793234	50888850	56	0.1493
16	50961575	51683175	613	-0.0624	50768573	51683175	25	-1.1837	50961575	52738403	40	-2.1146
16	51738510	52738403	613	-0.0624	51738510	54449563	97	-0.2605	50961575	52738403	40	-2.1146
16	52843217	54288894	613	-0.0624	51738510	54449563	97	-0.2605	52843217	54288894	68	-0.2796
16	54329357	54449563	613	-0.0624	51738510	54449563	97	-0.2605	54329357	56349895	58	-1.3893
16	54454198	56254752	613	-0.0624	54454198	56254752	46	-0.8866	54329357	56349895	58	-1.3893
16	56400214	58657607	613	-0.0624	56349895	59559905	212	-0.2354	56400214	58808472	191	0.0099
16	58661744	58808472	203	-0.1489	56349895	59559905	212	-0.2354	56400214	58808472	191	0.0099
16	58809972	59559905	203	-0.1489	56349895	59559905	212	-0.2354	58809972	65827099	216	-2.1042
16	59569128	65436155	203	-0.1489	59569128	65436155	182	-0.959	58809972	65827099	216	-2.1042
16	65446293	65827099	203	-0.1489	65446293	73015874	733	-0.1501	58809972	65827099	216	-2.1042
16	65926818	66299798	203	-0.1489	65446293	73015874	733	-0.1501	65926818	70808741	574	0.0002
16	66409731	70808741	876	-0.0272	65446293	73015874	733	-0.1501	65926818	70808741	574	0.0002
16	70844657	71245469	876	-0.0272	65446293	73015874	733	-0.1501	70844657	71245469	13	-1.4639
16	71258557	73015874	876	-0.0272	65446293	73015874	733	-0.1501	71258557	73295667	151	0.0164
16	73039613	73295667	876	-0.0272	73039613	74278509	69	-0.6776	71258557	73295667	151	0.0164
16	73297990	74240501	876	-0.0272	73039613	74278509	69	-0.6776	73297990	74240501	47	-1.9588
16	74274769	74278509	876	-0.0272	73039613	74278509	69	-0.6776	74274769	75683366	202	-0.0345
16	74282789	75683366	876	-0.0272	74282789	75929064	220	-0.2564	74274769	75683366	202	-0.0345
16	75701134	75896915	876	-0.0272	74282789	75929064	220	-0.2564	75701134	78023592	111	-1.7747
16	75921227	75929064	88	-0.1692	74282789	75929064	220	-0.2564	75701134	78023592	111	-1.7747
16	75988649	76488104	88	-0.1692	75988649	76488104	17	-1.307	75701134	78023592	111	-1.7747
16	76504471	78023592	88	-0.1692	76504471	90215975	748	-0.3288	75701134	78023592	111	-1.7747
16	78042517	78079447	88	-0.1692	76504471	90215975	748	-0.3288	78042517	78720332	34	-0.4337
16	78103513	78720332	58	-0.0518	76504471	90215975	748	-0.3288	78042517	78720332	34	-0.4337
16	78781181	78801033	58	-0.0518	76504471	90215975	748	-0.3288	78781181	80942990	57	-2.8748
16	78803618	80676059	67	-0.1605	76504471	90215975	748	-0.3288	78781181	80942990	57	-2.8748
16	80711354	80942990	104	-0.0596	76504471	90215975	748	-0.3288	78781181	80942990	57	-2.8748
16	80950177	81858889	104	-0.0596	76504471	90215975	748	-0.3288	80950177	81940567	91	-0.1148
16	81867141	81940567	75	-0.1613	76504471	90215975	748	-0.3288	80950177	81940567	91	-0.1148
16	82072047	82227561	75	-0.1613	76504471	90215975	748	-0.3288	82072047	82227561	8	-1.2431
16	82249201	83723702	75	-0.1613	76504471	90215975	748	-0.3288	82249201	83723702	45	-2.9056
16	83760367	83893155	75	-0.1613	76504471	90215975	748	-0.3288	83760367	83981887	12	-1.3827
16	83910622	83981887	615	-0.042	76504471	90215975	748	-0.3288	83760367	83981887	12	-1.3827
16	84004623	85953945	615	-0.042	76504471	90215975	748	-0.3288	84004623	85953945	153	-0.0862
16	86010031	86346446	615	-0.042	76504471	90215975	748	-0.3288	86010031	86346446	9	-2.2304
16	86354914	90148140	615	-0.042	76504471	90215975	748	-0.3288	86354914	90215975	266	-0.2226
17	15018	3006627	1573	-0.0512	8759	8488254	1174	-0.0758	8759	3006627	490	0.009
17	3010642	3311693	1573	-0.0512	8759	8488254	1174	-0.0758	3010642	3311693	14	-1.9881
17	3317458	5464856	1573	-0.0512	8759	8488254	1174	-0.0758	3317458	5464856	316	0.0071
17	5483479	6336043	1573	-0.0512	8759	8488254	1174	-0.0758	5483479	6336043	66	-1.1471
17	6338954	8488254	1573	-0.0512	8759	8488254	1174	-0.0758	6338954	10717302	553	-0.0543
17	8494283	8995300	1573	-0.0512	8494283	8995300	44	-0.5225	6338954	10717302	553	-0.0543
17	8999209	10717302	1573	-0.0512	8999209	21932497	1110	-0.1802	6338954	10717302	553	-0.0543
17	10729373	11729870	1573	-0.0512	8999209	21932497	1110	-0.1802	10729373	11729870	74	-1.9263
17	11752246	14151721	1573	-0.0512	8999209	21932497	1110	-0.1802	11752246	14151721	152	-0.6353
17	14163597	15011561	1573	-0.0512	8999209	21932497	1110	-0.1802	14163597	15011561	58	-1.7773
17	15014697	20238166	1573	-0.0512	8999209	21932497	1110	-0.1802	15014697	21495489	581	-0.0544
17	20527728	20843838	23	-0.2255	8999209	21932497	1110	-0.1802	15014697	21495489	581	-0.0544
17	20846451	21495489	47	-0.0721	8999209	21932497	1110	-0.1802	15014697	21495489	581	-0.0544
17	21513972	21932497	47	-0.0721	8999209	21932497	1110	-0.1802	21513972	21932497	24	-1.9428
17	25344898	31210730	2199	-0.0438	25344898	31332060	567	-0.2475	25344898	31210730	563	0.0038
17	31234361	31332060	2199	-0.0438	25344898	31332060	567	-0.2475	31234361	33160281	38	-2.0008
17	31397448	33160281	2199	-0.0438	31397448	33334843	36	-1.2425	31234361	33160281	38	-2.0008
17	33327370	33334843	2199	-0.0438	31397448	33334843	36	-1.2425	33327370	33588787	22	-0.1538
17	33335743	33588787	2199	-0.0438	33335743	49438915	1690	-0.3091	33327370	33588787	22	-0.1538
17	33735368	33857290	2199	-0.0438	33335743	49438915	1690	-0.3091	33735368	33857290	8	-1.8947
17	33861305	49438915	2199	-0.0438	33335743	49438915	1690	-0.3091	33861305	49546265	1666	-0.0374
17	49463069	49546265	2199	-0.0438	49463069	51466123	48	-0.8216	33861305	49546265	1666	-0.0374
17	49586164	51466123	2199	-0.0438	49463069	51466123	48	-0.8216	49586164	53003189	81	-2.5539
17	51516201	52424683	2199	-0.0438	51516201	52424683	27	-1.4385	49586164	53003189	81	-2.5539
17	52581274	53003189	2199	-0.0438	52581274	74779183	1727	-0.3289	49586164	53003189	81	-2.5539
17	53010976	53586208	2199	-0.0438	52581274	74779183	1727	-0.3289	53010976	53586208	19	0.1277
17	53600815	54505519	2199	-0.0438	52581274	74779183	1727	-0.3289	53600815	54505519	25	-2.3961
17	54505916	60725483	2199	-0.0438	52581274	74779183	1727	-0.3289	54505916	67421546	1080	-0.2338
17	60736619	61521388	44	-0.1652	52581274	74779183	1727	-0.3289	54505916	67421546	1080	-0.2338
17	61539098	67421546	1395	-0.0447	52581274	74779183	1727	-0.3289	54505916	67421546	1080	-0.2338
17	67441154	68536036	1395	-0.0447	52581274	74779183	1727	-0.3289	67441154	68536036	55	-1.5553
17	68562863	74779183	1395	-0.0447	52581274	74779183	1727	-0.3289	68562863	81118278	1099	-0.1938
17	74791828	74996741	1395	-0.0447	74791828	74996741	18	-1.1324	68562863	81118278	1099	-0.1938
17	75011778	81098626	1395	-0.0447	75011778	81118278	543	-0.2752	68562863	81118278	1099	-0.1938
18	69211	897152	210	-0.056	31915	15371135	824	-0.3694	31915	897152	74	-0.1934
18	919771	2095576	210	-0.056	31915	15371135	824	-0.3694	919771	2095576	37	-1.3854
18	2109178	4008913	210	-0.056	31915	15371135	824	-0.3694	2109178	4089969	134	-0.0803
18	4030004	4089969	113	-0.1472	31915	15371135	824	-0.3694	2109178	4089969	134	-0.0803
18	4105956	7694517	113	-0.1472	31915	15371135	824	-0.3694	4105956	7694517	172	-2.0564
18	7738526	8591119	113	-0.1472	31915	15371135	824	-0.3694	7738526	10613902	126	-0.0487
18	8607828	10613902	280	-0.0446	31915	15371135	824	-0.3694	7738526	10613902	126	-0.0487
18	10667454	11584484	280	-0.0446	31915	15371135	824	-0.3694	10667454	11584484	52	-2.124
18	11589785	13838074	280	-0.0446	31915	15371135	824	-0.3694	11589785	13838074	190	-0.1416
18	13843044	13941034	280	-0.0446	31915	15371135	824	-0.3694	13843044	13941034	5	-2.1948
18	13970637	14195486	280	-0.0446	31915	15371135	824	-0.3694	13970637	14195486	7	-0.1863
18	14245249	15355951	280	-0.0446	31915	15371135	824	-0.3694	14245249	15371135	27	-1.7262
18	18553834	20356828	242	-0.0396	18553834	21904110	294	-0.1602	18553834	20356828	162	0.0725
18	20377969	20378767	242	-0.0396	18553834	21904110	294	-0.1602	20377969	20378767	2	-3.0621
18	20435015	21904110	242	-0.0396	18553834	21904110	294	-0.1602	20435015	22198326	155	0.0123
18	21911453	22198326	242	-0.0396	21911453	28572055	211	-0.5919	20435015	22198326	155	0.0123
18	22262813	22701225	242	-0.0396	21911453	28572055	211	-0.5919	22262813	23330752	26	-2.1475
18	22785954	23132500	4	-0.3742	21911453	28572055	211	-0.5919	22262813	23330752	26	-2.1475
18	23142400	23330752	31	-0.0613	21911453	28572055	211	-0.5919	22262813	23330752	26	-2.1475
18	23514147	24001277	31	-0.0613	21911453	28572055	211	-0.5919	23514147	24001277	36	0.2046
18	24006567	24048514	31	-0.0613	21911453	28572055	211	-0.5919	24006567	28499888	120	-1.3693
18	24065915	27909714	63	-0.1693	21911453	28572055	211	-0.5919	24006567	28499888	120	-1.3693
18	27935415	28499888	885	-0.0741	21911453	28572055	211	-0.5919	24006567	28499888	120	-1.3693
18	28519048	28572055	885	-0.0741	21911453	28572055	211	-0.5919	28519048	30139049	105	0.0362
18	28655740	30139049	885	-0.0741	28655740	40606443	346	-0.2287	28519048	30139049	105	0.0362
18	30180501	31980535	885	-0.0741	28655740	40606443	346	-0.2287	30180501	31980535	41	-2.208
18	31987620	35315733	885	-0.0741	28655740	40606443	346	-0.2287	31987620	35315733	110	-0.1924
18	35394495	40606443	885	-0.0741	28655740	40606443	346	-0.2287	35394495	43080466	142	-2.032
18	40656992	42229801	885	-0.0741	40656992	42229801	29	-1.1887	35394495	43080466	142	-2.032
18	42243972	43080466	885	-0.0741	42243972	53467269	388	-0.2858	35394495	43080466	142	-2.032
18	43145182	48807060	885	-0.0741	42243972	53467269	388	-0.2858	43145182	48807060	257	-0.1995
18	48858591	51535873	885	-0.0741	42243972	53467269	388	-0.2858	48858591	51535873	55	-2.2138
18	51576424	52750031	885	-0.0741	42243972	53467269	388	-0.2858	51576424	52750031	33	-0.2098
18	52856816	53467269	885	-0.0741	42243972	53467269	388	-0.2858	52856816	54207832	34	-2.2427
18	53491756	54207832	885	-0.0741	53491756	54229500	12	-1.2068	52856816	54207832	34	-2.2427
18	54214286	54229500	885	-0.0741	53491756	54229500	12	-1.2068	54214286	54674303	14	-0.2434
18	54266884	54674303	885	-0.0741	54266884	61157349	314	-0.216	54214286	54674303	14	-0.2434
18	54727709	55077635	885	-0.0741	54266884	61157349	314	-0.216	54727709	55077635	8	-2.0633
18	55134690	58534066	885	-0.0741	54266884	61157349	314	-0.216	55134690	58534066	175	-0.0652
18	58544605	59248557	885	-0.0741	54266884	61157349	314	-0.216	58544605	59248557	25	-1.7428
18	59269097	61157349	885	-0.0741	54266884	61157349	314	-0.216	59269097	61737558	107	-0.0796
18	61184777	61737558	885	-0.0741	61184777	64097942	86	-0.6877	59269097	61737558	107	-0.0796
18	61752789	64097942	885	-0.0741	61184777	64097942	86	-0.6877	61752789	67212281	176	-1.8302
18	64113637	64434781	885	-0.0741	64113637	65234120	37	-0.1706	61752789	67212281	176	-1.8302
18	64658758	65234120	20	-0.2558	64113637	65234120	37	-0.1706	61752789	67212281	176	-1.8302
18	65266049	65710691	20	-0.2558	65266049	67537603	81	-0.6927	61752789	67212281	176	-1.8302
18	65781491	67212281	278	-0.0835	65266049	67537603	81	-0.6927	61752789	67212281	176	-1.8302
18	67251268	67537603	278	-0.0835	65266049	67537603	81	-0.6927	67251268	68235270	46	-0.1139
18	67709704	68115723	278	-0.0835	67709704	68115723	28	0.09	67251268	68235270	46	-0.1139
18	68134201	68235270	278	-0.0835	68134201	71480688	107	-0.6362	67251268	68235270	46	-0.1139
18	68255254	71480688	278	-0.0835	68134201	71480688	107	-0.6362	68255254	71886120	116	-1.7348
18	71513603	71886120	278	-0.0835	71513603	77977184	222	-0.303	68255254	71886120	116	-1.7348
18	71940081	75045302	278	-0.0835	71513603	77977184	222	-0.303	71940081	75045302	119	-0.4032
18	75069842	76535489	278	-0.0835	71513603	77977184	222	-0.303	75069842	76535489	29	-2.2486
18	76625691	77977184	278	-0.0835	71513603	77977184	222	-0.303	76625691	77977184	62	0.0204
19	260372	8125408	1425	-0.0524	183513	20040671	2988	-0.2967	183513	9293288	1438	0.0362
19	8129951	8306209	23	-0.2378	183513	20040671	2988	-0.2967	183513	9293288	1438	0.0362
19	8311160	9293288	789	-0.0439	183513	20040671	2988	-0.2967	183513	9293288	1438	0.0362
19	9297687	9391024	789	-0.0439	183513	20040671	2988	-0.2967	9297687	9391024	12	-1.9513
19	9409046	9552824	789	-0.0439	183513	20040671	2988	-0.2967	9409046	9552824	15	-0.2101
19	9554078	9662215	789	-0.0439	183513	20040671	2988	-0.2967	9554078	9662215	11	-1.8177
19	9669064	9786547	789	-0.0439	183513	20040671	2988	-0.2967	9669064	9786547	12	-0.4145
19	9804000	9885068	789	-0.0439	183513	20040671	2988	-0.2967	9804000	9885068	6	-2.2819
19	9890037	11864695	789	-0.0439	183513	20040671	2988	-0.2967	9890037	11864695	359	0.0128
19	11866053	12608720	789	-0.0439	183513	20040671	2988	-0.2967	11866053	12608720	108	-1.1203
19	12635940	13292093	789	-0.0439	183513	20040671	2988	-0.2967	12635940	13481007	129	0.0549
19	13301190	13481007	57	-0.1796	183513	20040671	2988	-0.2967	12635940	13481007	129	0.0549
19	13490662	13680142	57	-0.1796	183513	20040671	2988	-0.2967	13490662	13680142	18	-1.3325
19	13686642	13841681	57	-0.1796	183513	20040671	2988	-0.2967	13686642	14921284	185	-0.0229
19	13856195	14921284	1233	-0.0612	183513	20040671	2988	-0.2967	13686642	14921284	185	-0.0229
19	14942349	15176117	1233	-0.0612	183513	20040671	2988	-0.2967	14942349	15176117	25	-1.4418
19	15182746	19944666	1233	-0.0612	183513	20040671	2988	-0.2967	15182746	19944666	656	-0.0026
19	19948820	20040671	1233	-0.0612	183513	20040671	2988	-0.2967	19948820	21176563	94	-2.0586
19	20085058	21018523	1233	-0.0612	20085058	21018523	73	-0.9726	19948820	21176563	94	-2.0586
19	21021655	21176563	1233	-0.0612	21021655	21655810	65	-0.2152	19948820	21176563	94	-2.0586
19	21178891	21579262	1233	-0.0612	21021655	21655810	65	-0.2152	21178891	21579262	50	-0.4398
19	21582055	21655810	1233	-0.0612	21021655	21655810	65	-0.2152	21582055	24494920	247	-1.7121
19	21665369	23380602	1233	-0.0612	21665369	23380602	148	-0.9571	21582055	24494920	247	-1.7121
19	23384730	24361551	1233	-0.0612	23384730	24494920	91	-0.2965	21582055	24494920	247	-1.7121
19	28282524	30048530	93	-0.1138	28126214	33041369	160	-0.7515	28126214	30048530	47	-1.8419
19	30117006	30586986	93	-0.1138	28126214	33041369	160	-0.7515	30117006	31105946	51	-0.4153
19	30597045	31105946	30	-0.2677	28126214	33041369	160	-0.7515	30117006	31105946	51	-0.4153
19	31119428	31870155	30	-0.2677	28126214	33041369	160	-0.7515	31119428	32800155	45	-2.2373
19	31952294	32800155	3208	-0.0529	28126214	33041369	160	-0.7515	31119428	32800155	45	-2.2373
19	32813347	33041369	3208	-0.0529	28126214	33041369	160	-0.7515	32813347	33982280	111	0.1091
19	33042696	33198979	3208	-0.0529	33042696	33198979	23	-0.1762	32813347	33982280	111	0.1091
19	33210004	33290733	3208	-0.0529	33210004	33290733	10	-1.1604	32813347	33982280	111	0.1091
19	33312951	33933237	3208	-0.0529	33312951	33933237	59	-0.2101	32813347	33982280	111	0.1091
19	33965514	33982280	3208	-0.0529	33965514	34619183	46	-0.7581	32813347	33982280	111	0.1091
19	34033481	34475324	3208	-0.0529	33965514	34619183	46	-0.7581	34033481	34475324	27	-1.0609
19	34487301	34619183	3208	-0.0529	33965514	34619183	46	-0.7581	34487301	35169262	73	0.0494
19	34627709	35169262	3208	-0.0529	34627709	35754351	101	-0.1681	34487301	35169262	73	0.0494
19	35185034	35368252	3208	-0.0529	34627709	35754351	101	-0.1681	35185034	35368252	12	-1.5924
19	35386417	35754351	3208	-0.0529	34627709	35754351	101	-0.1681	35386417	36870983	153	0.012
19	35774790	35903532	3208	-0.0529	35774790	35903532	11	-1.2177	35386417	36870983	153	0.012
19	35906658	36870983	3208	-0.0529	35906658	52881824	1933	-0.3093	35386417	36870983	153	0.012
19	36881763	36905358	3208	-0.0529	35906658	52881824	1933	-0.3093	36881763	36905358	5	-2.4966
19	36910436	36989682	3208	-0.0529	35906658	52881824	1933	-0.3093	36910436	36989682	23	-0.43
19	36990531	38217388	3208	-0.0529	35906658	52881824	1933	-0.3093	36990531	38217388	122	-1.8719
19	38223782	41343543	3208	-0.0529	35906658	52881824	1933	-0.3093	38223782	41343543	352	-0.0153
19	41367911	41650719	3208	-0.0529	35906658	52881824	1933	-0.3093	41367911	41650719	22	-1.2738
19	41654447	52860822	3208	-0.0529	35906658	52881824	1933	-0.3093	41654447	52860822	1297	-0.03
19	52861529	52881824	3208	-0.0529	35906658	52881824	1933	-0.3093	52861529	52999675	19	-2.8928
19	52889979	52921330	3208	-0.0529	52889979	52921330	7	-1.9437	52861529	52999675	19	-2.8928
19	52931152	52999675	3208	-0.0529	52931152	56214253	455	-0.4079	52861529	52999675	19	-2.8928
19	53008767	53628389	3208	-0.0529	52931152	56214253	455	-0.4079	53008767	53628389	83	-0.2806
19	53633242	54259317	3208	-0.0529	52931152	56214253	455	-0.4079	53633242	54259317	87	-1.551
19	54270152	55022770	3208	-0.0529	52931152	56214253	455	-0.4079	54270152	55022770	131	-0.1014
19	55023383	55214399	3208	-0.0529	52931152	56214253	455	-0.4079	55023383	55214399	17	-1.6269
19	55225432	56214253	3208	-0.0529	52931152	56214253	455	-0.4079	55225432	56347414	146	-0.0814
19	56228492	56347414	3208	-0.0529	56228492	56575330	50	-0.974	55225432	56347414	146	-0.0814
19	56351842	56574495	3208	-0.0529	56228492	56575330	50	-0.974	56351842	56574495	31	-1.8319
19	56576947	56860998	3208	-0.0529	56576947	56860998	37	-0.3068	56575330	56860998	38	-0.3577
19	56865075	57496607	3208	-0.0529	56865075	57496607	47	-1.1946	56865075	57656865	59	-2.3422
19	57505040	57656865	3208	-0.0529	57505040	58421838	96	-0.3681	56865075	57656865	59	-2.3422
19	57666024	57973250	3208	-0.0529	57505040	58421838	96	-0.3681	57666024	57973250	41	-0.2613
19	57974558	58177204	3208	-0.0529	57505040	58421838	96	-0.3681	57974558	58177204	11	-2.1917
19	58191605	58421838	3208	-0.0529	57505040	58421838	96	-0.3681	58191605	58425778	33	0.2282
19	58430001	58602049	3208	-0.0529	58425778	58602049	32	-1.1872	58430001	58710657	52	-2.071
19	58612592	58710657	3208	-0.0529	58612592	59093829	82	-0.3915	58430001	58710657	52	-2.071
19	58714869	59088329	3208	-0.0529	58612592	59093829	82	-0.3915	58714869	59093829	61	-0.1996
20	134165	6151165	1011	-0.0774	82019	26248131	1035	-0.6042	82019	6151165	434	-0.0574
20	6167506	7946494	1011	-0.0774	82019	26248131	1035	-0.6042	6167506	7946494	43	-2.1133
20	7987498	11696483	1011	-0.0774	82019	26248131	1035	-0.6042	7987498	11696483	96	-0.2123
20	11760121	13143939	1011	-0.0774	82019	26248131	1035	-0.6042	11760121	13143939	34	-1.8933
20	13148923	15199616	1011	-0.0774	82019	26248131	1035	-0.6042	13148923	15199616	83	-0.0624
20	15256970	16082546	1011	-0.0774	82019	26248131	1035	-0.6042	15256970	16082546	25	-1.8918
20	16335515	16647700	1011	-0.0774	82019	26248131	1035	-0.6042	16335515	16647700	13	-0.3687
20	16683499	17245601	1011	-0.0774	82019	26248131	1035	-0.6042	16683499	17245601	17	-2.3531
20	17260356	18677291	1011	-0.0774	82019	26248131	1035	-0.6042	17260356	18677291	80	0.0657
20	18788639	19743956	1011	-0.0774	82019	26248131	1035	-0.6042	18788639	19743956	24	-1.4261
20	19747480	20823609	1011	-0.0774	82019	26248131	1035	-0.6042	19747480	20823609	37	-0.1878
20	20827073	20958922	1011	-0.0774	82019	26248131	1035	-0.6042	20827073	20958922	5	-1.8856
20	21007516	21477741	1011	-0.0774	82019	26248131	1035	-0.6042	21007516	21477741	25	-0.0674
20	21528622	24825204	1011	-0.0774	82019	26248131	1035	-0.6042	21528622	24825204	54	-1.3599
20	24936178	26248042	1011	-0.0774	82019	26248131	1035	-0.6042	24936178	26248131	65	-0.3417
20	29583855	30005987	1761	-0.0554	29442630	50818491	1590	-0.5866	29442630	30005987	18	-1.3768
20	30026249	37705308	1761	-0.0554	29442630	50818491	1590	-0.5866	30026249	37705308	753	-0.0444
20	37763797	39260691	1761	-0.0554	29442630	50818491	1590	-0.5866	37763797	39260691	30	-1.8429
20	39284750	40335932	1761	-0.0554	29442630	50818491	1590	-0.5866	39284750	40335932	51	-0.0451
20	40338602	42074071	1761	-0.0554	29442630	50818491	1590	-0.5866	40338602	42074071	64	-1.7187
20	42074436	50818491	1761	-0.0554	29442630	50818491	1590	-0.5866	42074436	50958316	678	-0.008
20	50828464	50958316	1761	-0.0554	50828464	51931253	27	-1.5612	42074436	50958316	678	-0.008
20	50968593	51931253	1761	-0.0554	50828464	51931253	27	-1.5612	50968593	51938147	24	-2.1475
20	51943952	52833173	1761	-0.0554	51938147	52926256	95	-0.6556	51943952	52841381	91	0.002
20	52882491	52926256	263	-0.1302	51938147	52926256	95	-0.6556	52853713	54910237	84	-1.8067
20	52946930	53254585	263	-0.1302	52946930	53254585	22	-1.7233	52853713	54910237	84	-1.8067
20	53261169	54910237	263	-0.1302	53261169	58564507	224	-0.7865	52853713	54910237	84	-1.8067
20	54931998	58564507	263	-0.1302	53261169	58564507	224	-0.7865	54931998	58564507	165	-0.233
20	58614110	60346159	263	-0.1302	58614110	60386820	35	-1.5299	58614110	60346159	33	-2.0092
20	60368819	60386820	263	-0.1302	58614110	60386820	35	-1.5299	60368819	62934100	140	-0.0062
20	60535664	62892786	200	-0.0542	60535664	62934100	138	-0.6753	60368819	62934100	140	-0.0062
21	9421431	11154720	44	-0.1386	9418291	11154720	63	-0.6643	9418291	11154720	63	-1.8041
21	14383121	16916265	51	-0.0556	14383121	26865804	467	-0.9248	14383121	16916265	82	-1.5856
21	16942929	17275865	51	-0.0556	14383121	26865804	467	-0.9248	16942929	17275865	14	-0.1681
21	17333267	17463943	51	-0.0556	14383121	26865804	467	-0.9248	17333267	18738675	50	-2.3115
21	17493049	18708875	23	-0.1828	14383121	26865804	467	-0.9248	17333267	18738675	50	-2.3115
21	18766555	19150899	39	-0.0054	14383121	26865804	467	-0.9248	18762686	19150899	34	-0.2329
21	19205837	19256554	39	-0.0054	14383121	26865804	467	-0.9248	19205837	26772089	286	-1.9608
21	19263403	26675572	214	-0.1538	14383121	26865804	467	-0.9248	19205837	26772089	286	-1.9608
21	26700163	26772089	147	-0.0806	14383121	26865804	467	-0.9248	19205837	26772089	286	-1.9608
21	26949494	27545451	147	-0.0806	26949494	27545451	41	-0.1335	26865804	27622374	48	-0.1392
21	27551780	27622374	147	-0.0806	27551780	32906911	228	-0.9349	26865804	27622374	48	-0.1392
21	27625229	30123477	147	-0.0806	27551780	32906911	228	-0.9349	27625229	30123477	83	-1.9702
21	30234885	30880276	147	-0.0806	27551780	32906911	228	-0.9349	30234885	30880276	27	-0.1207
21	30961745	32469152	82	-0.1711	27551780	32906911	228	-0.9349	30933015	32469152	68	-2.1075
21	32488287	32906911	82	-0.1711	27551780	32906911	228	-0.9349	32488287	33114340	62	0.0901
21	32911671	33006192	82	-0.1711	32911671	33406651	35	-0.3081	32488287	33114340	62	0.0901
21	33015006	33114340	402	-0.0332	32911671	33406651	35	-0.3081	32488287	33114340	62	0.0901
21	33117594	33406651	402	-0.0332	32911671	33406651	35	-0.3081	33117594	33711892	37	-1.1656
21	33418967	33608619	402	-0.0332	33418967	33608619	15	-1.3478	33117594	33711892	37	-1.1656
21	33614283	33711892	402	-0.0332	33614283	34306397	37	-0.1107	33117594	33711892	37	-1.1656
21	33722356	34306397	402	-0.0332	33614283	34306397	37	-0.1107	33722356	39019065	339	-0.0075
21	34347789	34565951	402	-0.0332	34347789	34565951	13	-1.3348	33722356	39019065	339	-0.0075
21	34578624	39019065	402	-0.0332	34578624	41106274	381	-0.2546	33722356	39019065	339	-0.0075
21	39093103	39979482	402	-0.0332	34578624	41106274	381	-0.2546	39093103	39979482	33	-1.7525
21	40038814	40889691	402	-0.0332	34578624	41106274	381	-0.2546	40038814	41106274	54	-0.0585
21	40902742	41106274	38	-0.1853	34578624	41106274	381	-0.2546	40038814	41106274	54	-0.0585
21	41110908	42436983	38	-0.1853	41110908	42488188	62	-1.0589	41110908	42488188	62	-2.1565
21	42445041	42488188	336	-0.0448	41110908	42488188	62	-1.0589	41110908	42488188	62	-2.1565
21	42576036	46650868	336	-0.0448	42576036	46650868	214	-0.2634	42576036	48117364	287	-0.0388
21	46658030	47386150	336	-0.0448	46658030	47386150	27	-0.9495	42576036	48117364	287	-0.0388
21	47387878	48064866	336	-0.0448	47387878	48117364	46	-0.0637	42576036	48117364	287	-0.0388
22	16926329	17521100	691	-0.0598	16080687	22680532	506	-0.249	16080687	17521100	40	-1.1155
22	17548539	22680532	691	-0.0598	16080687	22680532	506	-0.249	17548539	28333992	811	-0.1319
22	22729414	23020243	691	-0.0598	22729414	23020243	22	-1.1306	17548539	28333992	811	-0.1319
22	23060943	27116658	691	-0.0598	23060943	27116658	285	-0.2612	17548539	28333992	811	-0.1319
22	27125265	28333992	691	-0.0598	27125265	29051763	71	-0.8278	17548539	28333992	811	-0.1319
22	28364835	28622405	691	-0.0598	27125265	29051763	71	-0.8278	28364835	28967860	23	-2.3298
22	28684514	28967860	22	-0.2414	27125265	29051763	71	-0.8278	28364835	28967860	23	-2.3298
22	28984054	29051763	22	-0.2414	27125265	29051763	71	-0.8278	28984054	33286459	467	-0.1158
22	29074221	29559458	1721	-0.0418	29068249	29559458	64	-0.0324	28984054	33286459	467	-0.1158
22	29560658	29576585	1721	-0.0418	29560658	29576585	5	-1.5369	28984054	33286459	467	-0.1158
22	29589481	32673627	1721	-0.0418	29589481	32673627	343	-0.1505	28984054	33286459	467	-0.1158
22	32675187	33286459	1721	-0.0418	32675187	33530337	67	-0.6218	28984054	33286459	467	-0.1158
22	33288206	33530337	1721	-0.0418	32675187	33530337	67	-0.6218	33288206	35354103	143	-2.1216
22	33591833	34338948	1721	-0.0418	33591833	34338948	69	-0.0865	33288206	35354103	143	-2.1216
22	34351646	34607242	1721	-0.0418	34351646	34607242	18	-0.6289	33288206	35354103	143	-2.1216
22	34612097	34834545	1721	-0.0418	34612097	34834545	8	-1.5488	33288206	35354103	143	-2.1216
22	34848256	35354103	1721	-0.0418	34848256	35518333	32	-0.5643	33288206	35354103	143	-2.1216
22	35408031	35518333	1721	-0.0418	34848256	35518333	32	-0.5643	35408031	48107641	1253	-0.0157
22	35519120	47921821	1721	-0.0418	35519120	47921821	1235	-0.1948	35408031	48107641	1253	-0.0157
22	47923215	48107641	1721	-0.0418	47923215	49939181	90	-0.6639	35408031	48107641	1253	-0.0157
22	48129049	49858589	1721	-0.0418	47923215	49939181	90	-0.6639	48129049	49858589	71	-1.4835
22	49880428	49939181	1721	-0.0418	47923215	49939181	90	-0.6639	49880428	51244237	110	0.014
22	49964799	51146491	1721	-0.0418	49964799	51244237	103	-0.192	49880428	51244237	110	0.014
23	219332	3737431	397	-0.0652	219332	3860324	84	-0.193	219332	3860324	84	-0.2418
23	3951933	6511750	74	-0.194	3902802	8681746	141	-0.7732	3902802	8681746	141	-1.3124
23	6543007	8681746	1254	-0.0697	3902802	8681746	141	-0.7732	3902802	8681746	141	-1.3124
23	8697532	11171569	1254	-0.0697	8697532	20612380	564	-0.2693	8697532	11171569	95	0.0424
23	11341909	12713616	1254	-0.0697	8697532	20612380	564	-0.2693	11341909	12713616	29	-1.2858
23	12751752	20612380	1254	-0.0697	8697532	20612380	564	-0.2693	12751752	25097591	715	-0.0174
23	20694454	21642720	1254	-0.0697	20694454	21642720	20	-0.8981	12751752	25097591	715	-0.0174
23	21645541	22620383	1254	-0.0697	21645541	22620383	48	-0.2548	12751752	25097591	715	-0.0174
23	22626676	23211768	1254	-0.0697	22626676	23211768	32	-0.9486	12751752	25097591	715	-0.0174
23	23217622	25097591	1254	-0.0697	23217622	58421316	1747	-0.3482	12751752	25097591	715	-0.0174
23	25141890	26379019	1254	-0.0697	23217622	58421316	1747	-0.3482	25141890	26379019	30	-1.2354
23	26487408	31023433	1254	-0.0697	23217622	58421316	1747	-0.3482	26487408	31023433	212	0.2799
23	31031284	36978623	1254	-0.0697	23217622	58421316	1747	-0.3482	31031284	36978623	213	-1.4488
23	36982555	58003859	1254	-0.0697	23217622	58421316	1747	-0.3482	36982555	58421316	1117	0.0216
23	62253658	66187430	1500	-0.0882	62141982	107375222	1253	-0.349	62141982	66187430	73	-0.2005
23	66321184	66813296	1500	-0.0882	62141982	107375222	1253	-0.349	66321184	66813296	6	-2.0377
23	67148750	71949425	1500	-0.0882	62141982	107375222	1253	-0.349	67148750	71949425	276	0.1138
23	72404164	72778522	1500	-0.0882	62141982	107375222	1253	-0.349	72404164	72778522	6	-2.0197
23	72781359	73948270	1500	-0.0882	62141982	107375222	1253	-0.349	72781359	73948270	59	0.0716
23	73970989	74131179	1500	-0.0882	62141982	107375222	1253	-0.349	73970989	74131179	4	-2.2666
23	74300232	75444036	1500	-0.0882	62141982	107375222	1253	-0.349	74300232	75444036	17	-0.0155
23	75464164	76152957	1500	-0.0882	62141982	107375222	1253	-0.349	75464164	76152957	9	-1.5662
23	76419235	77383966	1500	-0.0882	62141982	107375222	1253	-0.349	76419235	77383966	64	0.0804
23	77400400	95860677	1500	-0.0882	62141982	107375222	1253	-0.349	77400400	95860677	343	-1.0535
23	95869340	97043598	1500	-0.0882	62141982	107375222	1253	-0.349	95869340	97043598	68	0.0363
23	97126617	99696319	1500	-0.0882	62141982	107375222	1253	-0.349	97126617	99696319	54	-1.1532
23	99699156	100703673	1500	-0.0882	62141982	107375222	1253	-0.349	99699156	100703673	94	0.0616
23	100713567	101501638	1500	-0.0882	62141982	107375222	1253	-0.349	100713567	101501638	17	-1.1934
23	101773827	103633394	1500	-0.0882	62141982	107375222	1253	-0.349	101773827	103633394	79	0.0878
23	103644107	104965333	1500	-0.0882	62141982	107375222	1253	-0.349	103644107	104965333	29	-0.8785
23	105023376	107375222	1500	-0.0882	62141982	107375222	1253	-0.349	105023376	109631182	122	0.1078
23	107483397	108208056	1500	-0.0882	107483397	108208056	21	-1.0385	105023376	109631182	122	0.1078
23	108225878	109631182	1500	-0.0882	108225878	112537301	122	-0.3889	105023376	109631182	122	0.1078
23	109733144	110741157	1500	-0.0882	108225878	112537301	122	-0.3889	109733144	110741157	13	-1.3656
23	110743905	112537301	1500	-0.0882	108225878	112537301	122	-0.3889	110743905	115913007	173	0.0376
23	112593028	113177060	1500	-0.0882	112593028	113177060	18	-1.1405	110743905	115913007	173	0.0376
23	113180262	115913007	1500	-0.0882	113180262	123369166	482	-0.329	110743905	115913007	173	0.0376
23	115920043	116606307	1500	-0.0882	113180262	123369166	482	-0.329	115920043	116606307	14	-1.4085
23	116882931	123369166	1500	-0.0882	113180262	123369166	482	-0.329	116882931	123537294	383	0.0849
23	123370968	123537294	1500	-0.0882	123370968	126689842	65	-0.9371	116882931	123537294	383	0.0849
23	123542084	126689842	1500	-0.0882	123370968	126689842	65	-0.9371	123542084	128315484	93	-1.2649
23	126704869	128315484	1500	-0.0882	126704869	135083420	342	-0.2899	123542084	128315484	93	-1.2649
23	128403146	135083420	1500	-0.0882	126704869	135083420	342	-0.2899	128403146	136383826	377	0.059
23	135090487	135765610	1500	-0.0882	135090487	135765610	30	-0.9181	128403146	136383826	377	0.059
23	135783959	136383826	1500	-0.0882	135783959	136584833	49	-0.1528	128403146	136383826	377	0.059
23	136466430	136584833	1500	-0.0882	135783959	136584833	49	-0.1528	136466430	138738313	80	-1.3903
23	136618961	138685918	1500	-0.0882	136618961	138685918	69	-0.8699	136466430	138738313	80	-1.3903
23	138688609	138738313	1500	-0.0882	138688609	139020053	18	0.0315	136466430	138738313	80	-1.3903
23	138801076	139020053	1500	-0.0882	138688609	139020053	18	0.0315	138801076	139109049	21	0.2263
23	139047912	139109049	1500	-0.0882	139047912	146384245	242	-0.7686	138801076	139109049	21	0.2263
23	139140850	146384245	1500	-0.0882	139047912	146384245	242	-0.7686	139140850	148450921	278	-1.2501
23	146404981	148450921	1500	-0.0882	146404981	154819035	253	-0.3491	139140850	148450921	278	-1.2501
23	148483730	154819035	1500	-0.0882	146404981	154819035	253	-0.3491	148483730	154819035	212	-0.1701
24	7414009	10022029	2	-0.1033	148518	10032472	127	-0.1557	148518	10032472	127	-0.3682
24	25207542	28724269	3	-0.0967	13132760	59327398	163	-0.2697	13608565	28724269	143	-0.2123
24	59021020	59026041	3	-0.0967	13132760	59327398	163	-0.2697	59021020	59327398	5	-1.8114

## Sheet: links
UCSC Genome Browser link parameters
full	http://genome.ucsc.edu/cgi-bin/hgTracks?db=hg19&position=chr7%3A141998702-149834113&hgsid=443358811_uawFxZ8D0XFx7YCAwxfiOv0gYN64
left	http://genome.ucsc.edu/cgi-bin/hgTracks?db=hg19&position=chr
right	&hgsid=443358811_uawFxZ8D0XFx7YCAwxfiOv0gYN64
window size	50000
HYPERLINK(CONCATENATE(links!$B$5;$T2;":";$U2-links!$B$7;"-";$V2+links!$B$7;links!$B$6))
