# Supplementary material for: The epigenetic landscape of Alu repeats delineates the structural and functional genomic architecture of colon cancer cells
Source: HighWire-hosted journal article supplement (doi:10.1101/gr.207522.116), 2016-12-20
Supplement: Supplemental_Data_S8.xlsx [file Supplemental_Data_S8.xlsx]

## Sheet: Description
Supplemental Data S8. Alu RNA expression and DNA methylation
Mireia Jordà et al.
Sheet name
RNA expression	Id	unique identifier
	alu_expression	mean no of reads overlapping the Alu in two replicates of the HCT116 cell line
	closest_gene_expression	mean no of reads overlapping the Alu closets gene in two replicates of the HCT116 cell line
	DNA methylation	Mean DNA methylation of all the CpGs located inside the Alu determined by RRBS
Alu annotation	Id	unique identifier
	repeat chromosome	chromosome location
	repeat start	location
	repeat end	location
	repeat name	Alu type and location
	repeat strand	DNA strand
	repeat length	length
	closest gene chromosome	closest gene chromosome location
	closest gene start	closest gene location
	closest gene end	closest gene location
	closest gene strand	closest gene location
	closest gene expression (read count)	closest gene location
	closest gene ensg identifier	ENSEMBL gene identifier
	repeat to closest gene distance (0 if overlap)	distance to closest gene
	repeat average methylation beta value	Mean DNA methylation of all the CpGs located inside the Alu determined by RRBS
	hmar chromosome	HMAR chromosome location
	hmar start	HMAR location
	hmar end	HMAR location
	hct hmar tag	HMAR/no HMAR location of the Alu

## Sheet: RNA expression
Id	alu_expression	closest_gene_expression	DNA methylation
1	3.16176	0	0.793651
2	0	0	0.796296
3	0	70.9116	0.925926
4	3.08088	70.9116	0.9656
5	0	70.9116	0.345257
6	6.32351	10359	0.981834
7	238.668	56336.1	0.730769
8	88.2057	858.63	0.954545
9	0	49453	1
10	5.32351	49453	0.962963
11	492.58	13226.2	0.830797
12	125.61	13226.2	0.0844837
13	107.448	13226.2	0.963964
14	5.24263	11556.1	0.865
15	1.08088	15117	0.39881
16	20.7279	15117	0.777778
17	97.0144	15117	1
18	83.7718	23346.4	0.651275
19	1	23346.4	0.966441
20	0	28.0514	0.831322
21	0	28.0514	0.519984
22	0	906.352	0
23	6.16176	8383.69	0.957743
24	8.32351	3740.39	0.96345
25	45.4263	10355.3	0.447794
26	1	169.838	0.980769
27	13.4044	169.838	0.982758
28	0	1785.89	0.98226
29	17	16050.4	0.975073
30	1	3195.96	0.895731
31	1.08088	3195.96	0.943569
32	4.24263	19832.8	0.969697
33	0	18516	0.956062
34	0	0	0.357793
35	17.4853	10485	0.972222
36	65.3455	929.594	0.477273
37	113.257	12068.1	1
38	0	24.0514	0.466667
39	2.08088	29.3749	1
40	0	29.3749	0.969298
41	3.16176	39699.2	0.986487
42	0	103730	0.567901
43	0	103730	0.97094
44	0	19633.5	0.931801
45	1	19633.5	0.888889
46	0	272858	0.973897
47	0	29.6176	0.752778
48	999.042	7122.48	0.338638
49	2.16176	2702.8	0.924055
50	2	2702.8	0.968992
51	0	2702.8	0.888889
52	0	4225.8	0.987179
53	3.16176	4225.8	1
54	4.24263	4225.8	0.973118
55	1.08088	62597.9	0.992647
56	1	2025.62	0.918574
57	0	26639.8	0.946353
58	3	26639.8	0.175946
59	5.16176	26639.8	0.988064
60	2.08088	48490.5	0.983165
61	11.5661	894.424	0.975
62	2	15693.8	1
63	1.08088	15693.8	0.555556
64	12.1618	8534.73	0.983575
65	1.08088	8534.73	0.5
66	0	26.294	0.630953
67	7.16176	35120.9	0.444444
68	0	48799.7	0.694445
69	7.16176	61668.6	0.972789
70	1.08088	61668.6	0.51281
71	1.08088	7164.5	0.964487
72	0	3.16176	0.368132
73	4.16176	16045.3	0.416667
74	0	66700.5	0.333333
75	12.1618	12137.1	0.333333
76	1	37479.1	0.949495
77	1.08088	9256.68	0.910784
78	1	0	0.972222
79	0	0	0.81579
80	0	0	0.761905
81	0	0	0.444445
82	1	0	0.464286
83	0	7812.89	0.555555
84	2	7812.89	1
85	0	3726.45	0.530322
86	0	3726.45	0.830986
87	4.16176	3726.45	1
88	3.08088	3726.45	0.333333
89	0	3726.45	0.583333
90	16.8897	3726.45	0.735043
91	1	4453.25	0.5
92	2.08088	2839.5	0.967928
93	1.08088	9791.75	0.968254
94	1.08088	24.2132	0.897355
95	3.08088	4281.93	0.976562
96	7.24263	4281.93	1
97	9.48527	25834.4	0.475
98	1.08088	2.16176	0.972973
99	0	88618.2	0.951613
100	0	0	1
101	2.16176	21788.3	0.583333
102	0	162.603	0.981482
103	42.2132	9597.36	0.974359
104	7.16176	5.32351	0.333333
105	1.08088	12430.6	0.984303
106	2	12430.6	0.666667
107	35.6176	35173.8	0.986667
108	8.40439	32125.2	0.987903
109	0	1464.67	0.416667
110	0	40226	0.555556
111	0	9705.78	0.94359
112	0	0	0.666667
113	0	108.529	0.433333
114	0	108.529	0.388889
115	0	5.24263	0.216667
116	0	173745	0.666667
117	1	196.867	0.707143
118	0	31302.3	0.733333
119	0	6375.78	1
120	61.5586	6375.78	0.993464
121	0	9975.84	0.67972
122	2.08088	3867.54	0.753456
123	3.08088	45088.3	0.993243
124	2.08088	30129.5	0.985328
125	0	135.904	0.972222
126	0	8545.01	0.0666667
127	2.08088	35480	0.431791
128	0	35480	0.666667
129	8.40439	65940.4	0.949039
130	0	65940.4	0.363992
131	2.08088	21235.3	0.444444
132	2.08088	14029.9	0.733333
133	0	9.40439	0.333333
134	2	1836.27	0.273591
135	0	1836.27	1
136	0	56421.9	0.666667
137	7.24263	1459.17	0.635022
138	0	4832.68	0.555556
139	0	85673.2	0.775
140	15.4853	2711.13	0.976608
141	0	210.838	0.974786
142	0	47238.4	0.85
143	0	47238.4	0.50912
144	0	12717.5	0.916667
145	8.24263	6655.93	1
146	5.32351	10298.7	0.986667
147	0	21403.6	0.82906
148	0	7.08088	0.958759
149	0	42.7793	0.916667
150	0	5199.74	0.967742
151	0	8137.65	0.840909
152	0	8137.65	0.686274
153	0	8137.65	0.955357
154	0	14996.5	0.95977
155	0	16707.2	0.945946
156	10.4853	20206.5	0.625
157	0	20206.5	0.949219
158	0	8.56615	1
159	43.8602	1939.16	0.333333
160	15.4853	5636.18	0.991453
161	4.16176	5636.18	0.5625
162	0	6894.92	0.978956
163	1	1391.68	0.973214
164	0	1391.68	0.989637
165	0	1391.68	0.594697
166	7.40439	23465.3	0.958333
167	3.16176	13017.7	0.0295082
168	0	6416.68	0.636363
169	0	6416.68	0.915048
170	0	5178.93	0.533333
171	0	5178.93	0.982795
172	0	5178.93	0.967391
173	5.16176	13117.9	0.98
174	71.8307	36206.2	0.731482
175	9.08088	36206.2	0.98374
176	0	36206.2	1
177	0	36206.2	0.974206
178	1	6301.85	0.958709
179	0	6301.85	0.933333
180	0	6301.85	1
181	1	6301.85	0.903523
182	17.4853	6301.85	0.983593
183	5.16176	6301.85	0.990941
184	2.08088	36506.6	0.972649
185	0	36506.6	0.779762
186	0	4.08088	0.966667
187	2.16176	4.08088	0.4
188	1	20145.9	0.979167
189	0	20145.9	0.246032
190	8.24263	20145.9	0.958333
191	0	20145.9	0.95913
192	0	29316.9	0.988506
193	2.08088	9507.96	0.979308
194	1	9507.96	0.916667
195	0	294.499	0.929487
196	70.1837	44661.8	0.976952
197	1	44661.8	0.967867
198	1	44661.8	0.970268
199	9.08088	44661.8	0.988235
200	0	44661.8	0.536131
201	0	44661.8	0.977692
202	1	265.919	0.388889
203	0	265.919	0.920635
204	0	265.919	0.708245
205	0	265.919	1
206	0	6784.1	0.826572
207	0	165.33	0.926415
208	0	612.064	0.111111
209	0	20961.3	0.99
210	0	20961.3	0.866525
211	0	1225.63	0.971063
212	0	1655.42	1
213	2.08088	21530.5	0.617153
214	1.08088	45640.1	1
215	2	6957.87	0.933333
216	2	15895.5	0.915
217	0	118.147	0.955192
218	1.08088	2.08088	0.977298
219	1.08088	2.08088	0.960971
220	8	4966.06	0.0415418
221	1	2562.54	0.444444
222	9.24263	8049.37	0.666667
223	3	20924.2	1
224	0	20924.2	0.977012
225	1.08088	2918.29	0.524522
226	0	39041.6	0.992064
227	0	0	0.722222
228	0	38359.4	0.6
229	1	22641.8	0.97988
230	0	22641.8	0.972789
231	7.40439	31326.3	0.0131774
232	0	3031.35	0.911111
233	6.32351	6833.52	0.6
234	2	34010.1	0.242424
235	7.40439	72874.5	0.983333
236	0	8.32351	0.7
237	1	1.08088	0.936842
238	0	1.08088	0.8125
239	0	8548.5	0.958333
240	0	8548.5	0.911688
241	0	33.1323	0.844777
242	0	33.1323	0.594872
243	0	22141.2	0.982143
244	8.32351	22141.2	0.0548172
245	3	117079	1
246	5.08088	117079	0.722222
247	0	87632.3	1
248	32.8897	1336.18	0.952381
249	0	1336.18	0.875
250	0	3459.23	0.93514
251	0	22565.9	0.25
252	2.16176	6330.15	0.929524
253	0	604.558	0.960573
254	1	0	0.85
255	2.16176	0	0.982079
256	9.32351	18029.7	1
257	0	1918.66	0.888889
258	0	1918.66	0.111111
259	0	1918.66	0.945782
260	0	345.925	0.888889
261	0	345.925	0.923077
262	8.32351	67663.6	1
263	0	2.16176	0.974843
264	11.647	1750.84	0.958333
265	11.0809	1750.84	0.969388
266	0	48436.7	0.95
267	0	26.8897	1
268	0	18484.6	0.925926
269	3.08088	28232.7	0.8
270	0	1010.98	1
271	14.647	0	1
272	1.08088	572.991	0.933333
273	3.16176	572.991	0.933333
274	80.1762	1373.06	0.937895
275	25.294	1373.06	0.984849
276	0	871.895	0.975309
277	4.08088	85.2351	0.708333
278	0	85.2351	0.626667
279	0	463.602	0.981536
280	0	463.602	0.734836
281	2	25644.1	1
282	1	53657.9	0.919444
283	74.3969	7206.89	0.0535714
284	9.32351	25947.4	0.733283
285	2.08088	25947.4	0.975821
286	1	86.5881	0.941919
287	2.08088	17.3235	0.546667
288	2	21579.1	0.52381
289	1	9082.75	0.666667
290	2	20376.5	0.473684
291	31.8897	20376.5	1
292	0	3778.6	0.7
293	0	3778.6	0.759272
294	0	12313	0.981818
295	3.08088	14305.6	0.981092
296	5.16176	14305.6	0.932099
297	2.08088	14305.6	0.980769
298	7.24263	10972.7	0.965368
299	7.16176	10980.3	0.970109
300	41.2132	28304	0.668604
301	0	2.08088	0.955556
302	2.16176	8635.07	0.833333
303	0	7.40439	0.4375
304	0	0	0.8
305	8.48527	88.4778	0.444444
306	1	88.4778	0.809524
307	8.16176	21556.2	0.166667
308	2.08088	252.352	0.861111
309	0	7289.92	0.4125
310	55.3969	1706.46	0.908515
311	0	1706.46	0.966928
312	0	40156.8	1
313	0	6.32351	0.51282
314	0	7796.65	0.989418
315	0	8068.54	0.791667
316	0	1386.58	0.985662
317	0	1386.58	1
318	0	3161.66	0.945342
319	0	3161.66	0.555556
320	0	4341.66	0.983201
321	1	24469.4	0.940068
322	0	0	0.333333
323	0	0	0.873737
324	0	0	0.942857
325	0	3873.18	0.666667
326	1.08088	3873.18	0.45
327	0	83.3969	0.583333
328	0	6511.71	0.990566
329	0	3.24263	0.393467
330	0	9682	0.979167
331	1	6893.12	0.952197
332	0	27813.2	0.481482
333	12.2426	10147.8	0.980294
334	0	2.16176	0.962022
335	0	54068.8	0.475
336	19.5661	16716.7	0.916581
337	0	16716.7	0.866667
338	0	10.4853	0.555556
339	0	10.4853	0.888889
340	0	5052.19	0.178947
341	0	0	1
342	0	0	0.992647
343	0	0	0.968386
344	0	0	0.944444
345	0	1534.17	0.948718
346	0	17893.6	0.408463
347	2.08088	38235.8	0.206934
348	283.617	38235.8	0.988095
349	0	704.167	0.95559
350	0	519.528	0.933333
351	0	438.19	0.622222
352	1	5793.96	0.714286
353	16.8897	27634.7	0.282366
354	2.16176	128.036	0.967742
355	0	24.0514	0.395062
356	0	43.9925	0.381579
357	0	43.9925	0.96875
358	0	43.9925	0.978068
359	0	43.9925	0.952621
360	0	43.9925	1
361	0	43.9925	0.377778
362	0	137.036	0.916667
363	0	137.036	1
364	0	137.036	0.990253
365	0	137.036	0.571429
366	0	137.036	0.928572
367	0	7623.96	0.967548
368	0	7623.96	0.75
369	8.40439	8259.64	0.888889
370	0	2	0.928104
371	0	3715.16	0.9375
372	0	139.088	0.966667
373	1.08088	11178.3	1
374	0	4967.25	0.6875
375	0	4967.25	0.986395
376	0	4967.25	0.734455
377	0	4967.25	0.969828
378	0	26060.9	0.416666
379	0	26060.9	0.973684
380	1	26060.9	0.333333
381	3.16176	8281.96	0.70851
382	0	9294.99	0.125
383	1.08088	232.345	0.618687
384	0	10552.9	0.957885
385	2	4570.13	0.416667
386	0	4570.13	0.454545
387	17.8897	4570.13	0.975297
388	0	4.32351	0.99061
389	0	4.32351	0.333333
390	0	437.212	1
391	0	2691.04	0.977273
392	1.08088	1865.67	0.978836
393	0	4751.33	0.547598
394	82.6909	10778	1
395	3	21247.9	0.932436
396	0	2825.98	0.809524
397	1.08088	3445.25	0.919103
398	0	3445.25	0.941667
399	0	3860.58	1
400	1	3860.58	0.771894
401	5	3860.58	0.596284
402	0	1101.03	0.888889
403	66.669	4321.96	0.49
404	0	4321.96	0.96615
405	12.647	24049.2	0.993903
406	0	24049.2	0.959677
407	0	2553.81	0.982512
408	0	0	0.547863
409	2	3664.88	0.5
410	1.08088	8611.18	0.99
411	0	39.6176	0.99435
412	0	0	0.965812
413	0	9.56615	0
414	0	9.56615	1
415	0	9.56615	0.96748
416	0	9.56615	0.392857
417	0	0	0.949495
418	0	0	0.222222
419	0	0	0.963109
420	0	1919.67	0.965652
421	0	1919.67	0.902581
422	0	1919.67	0.969157
423	0	1919.67	0.946025
424	3.16176	270.396	0.515152
425	90.8013	270.396	0.380927
426	0	6901.24	0.978572
427	2	3247.75	0.6875
428	1	15.5661	0.633333
429	0	15.5661	0.75
430	0	326.903	0.777778
431	10.647	353.198	0.822449
432	9.48527	24435.2	0.968903
433	0	2873.67	0.5625
434	5.08088	32.4558	0.958333
435	0	3124.17	0.947369
436	19.7279	199.191	0.991071
437	0	8.40439	0.143333
438	9.40439	7751.76	0.952381
439	0	2	0.979167
440	1	8647.53	0.935026
441	3.16176	6634.2	0
442	1	6634.2	0.891667
443	1	455.109	0.997076
444	0	225.161	0.971015
445	0	32132.6	0.948718
446	0	32132.6	1
447	2	6170.57	0.643878
448	0	21834.8	0.957747
449	8.08088	21834.8	0.949495
450	3.24263	21941.2	0.542004
451	0	2128.5	0.966667
452	1	18.3235	1
453	1	13919.2	0.531073
454	1	27245.5	0.964286
455	0	4368.63	0.559524
456	0	17.8088	0.568182
457	0	1337.59	0.954546
458	0	1337.59	0.714647
459	0	0	0.893617
460	0	0	0.485876
461	1.08088	0	0.73907
462	0	4543.02	0.333333
463	0	4543.02	0.966667
464	0	4543.02	0.882281
465	0	4543.02	0.96
466	0	0	0.291667
467	0	0	0.0555555
468	0	0	0
469	0	180.595	0.960526
470	0	48.1542	0.885428
471	0	3259.45	0.982954
472	0	527.241	0.747271
473	0	0	0.91954
474	0	3837.27	0.962963
475	0	0	0.892815
476	0	468.167	0.992064
477	0	2122.55	0.875872
478	0	3595.6	0.983333
479	0	18267.4	0.021177
480	0	18267.4	0.333333
481	0	9906.46	0.05
482	42.7793	1138.79	0
483	0	1138.79	0.415205
484	0	0	1
485	0	15908.5	1
486	1	26466.7	0.972974
487	0	26466.7	0.923368
488	1	26466.7	0.525
489	0	5472.28	0.980263
490	4	313.308	0.969697
491	0	2251.94	0.919066
492	5.24263	21060.4	0.733333
493	0	222.838	0.960784
494	0	45432.2	0.951885
495	38.8088	38360.9	0.894737
496	0	10685.4	0.666667
497	81.6395	357.661	0.777778
498	1	15687.6	0.807479
499	0	15687.6	0.472222
500	10.3235	16111.8	0.944445
501	270.293	19608.5	0.983939
502	2.08088	19608.5	0.959142
503	0	29.3235	0.95935
504	0	29.3235	0.122115
505	0	29.3235	0.969689
506	0	618.005	0.689266
507	0	442.962	0.981764
508	0	32708.7	0.885714
509	111.176	4466.45	0
510	0	137.095	0.121693
511	0	43326.1	0.933947
512	1.08088	33076.4	0.719298
513	0	1214.4	0.971264
514	0	0	0.481481
515	0	0	0.949583
516	0	7.24263	0.333333
517	0	19045.3	0.901316
518	29.2132	89145.7	0.00408162
519	0	511.455	0.965907
520	93.5586	18473.7	1
521	0	3.24263	0.969697
522	0	3821.25	0.944142
523	0	209.073	0.318631
524	78.4263	41168.4	0.952584
525	7.16176	41168.4	0.989583
526	0	41168.4	0.52381
527	0	41168.4	0.979636
528	2.16176	41168.4	0.47619
529	3.16176	41168.4	0.986111
530	0	4891.62	0.986865
531	1	4891.62	0.910442
532	1	4891.62	0.592592
533	0	98.7204	0.990741
534	30.0219	3324.75	0
535	10.0809	0	0.957265
536	0	46688	0.686274
537	6.32351	1299	0.983333
538	2	690.549	0.714286
539	0	11259.9	0.563637
540	2.08088	21692.8	0.980378
541	1	21692.8	0.97421
542	1	533.366	0.805555
543	0	1	1
544	0	6357.62	0.625
545	0	2.16176	0.678571
546	0	0	0.193443
547	0	0	0.070922
548	0	0	0.666667
549	1	0	0.625
550	0	0	0.899207
551	1.08088	2706.79	0.821225
552	0	52.0219	0.527778
553	0	0	0.918254
554	0	0	0.633333
555	41.8088	17888.9	0.965517
556	5.24263	17888.9	0.954955
557	4	17888.9	0.802778
558	6.24263	17593.1	0.736378
559	3.08088	9460.72	0.989071
560	3.24263	9460.72	0.985916
561	0	1034.34	0.96
562	8.64702	452.035	1
563	4	15749.4	0.96875
564	7.24263	15749.4	0.619048
565	54.8602	2697.67	0.964614
566	0	7.48527	0.929167
567	0	1.08088	0.944444
568	0	19683.1	1
569	1.08088	3001.56	0.947368
570	0	0	0.333333
571	0	0	0.555555
572	0	1	0.96875
573	9.32351	15483.6	0.953704
574	0	15483.6	0.2
575	0	18.9705	0.866667
576	0	9771.72	0.833333
577	0	45.3749	0.638889
578	0	45.3749	0.822222
579	0	6336.45	1
580	1.08088	2.08088	0.833333
581	0	2	0.333333
582	0	61.5881	0.253968
583	0	135558	0.974359
584	0	1502.59	0.842105
585	235.779	914.983	0.857143
586	0	5772.65	0.8
587	1	10216.7	0.971698
588	0	10216.7	0.444445
589	0	0	0.425
590	1	13425.9	0.666667
591	0	13425.9	0.959064
592	0	13425.9	0.955357
593	0	23.3749	0.516667
594	0	7226.33	0.534314
595	2.08088	7226.33	0.581897
596	3.08088	9552.25	1
597	0	14020.1	0.992424
598	4.16176	14020.1	0.5625
599	0	916.144	0.974359
600	0	916.144	0.656565
601	0	2.16176	0.945168
602	1	9477.74	0.533333
603	2	7043.75	0.968031
604	1.08088	7043.75	0.666667
605	0	11337.9	0.98
606	41.5072	117730	0.545894
607	4.16176	117730	0.977778
608	1.08088	2	0.981343
609	0	1233.96	1
610	0	1915.69	0.974359
611	1	8128.06	0.666667
612	0	3430.27	0.919048
613	1.08088	9228.97	0.989899
614	0	1557.5	0.722222
615	1	6978.73	0.97619
616	0	6978.73	0.791667
617	0	6978.73	0.976656
618	0	6978.73	0.916667
619	0	6978.73	1
620	0	7.16176	1
621	0	7.16176	0.494167
622	0	7.16176	0.964286
623	0	7.16176	0.980392
624	0	7.16176	0.95
625	0	7.16176	0.981481
626	0	7.16176	0.980392
627	0	7.16176	0.666667
628	0	2.16176	0.925926
629	0	2.16176	0.918085
630	0	2.16176	0.944445
631	0	2.16176	0.506917
632	0	2.16176	0.970693
633	3.08088	11044.2	0.977564
634	2.16176	14606.8	1
635	0	14606.8	0.777778
636	1	14606.8	0.933446
637	1	14606.8	0.25
638	0	14606.8	1
639	0	14606.8	0.583333
640	0	2.16176	0.311966
641	0	2.16176	0.958333
642	0	2.16176	0.757576
643	0	2.16176	0.976136
644	0	26.294	0.95
645	0	0	0.952381
646	0	0	1
647	1	6238.37	0.962173
648	0	75.9925	0.99187
649	0	5998.89	0.985507
650	0	3.16176	0.99187
651	0	552.072	0.9791
652	0	552.072	0.750117
653	1	552.072	0.625
654	0	2	0.595238
655	95.8527	15054	0.677339
656	142.661	15054	0.985714
657	0	20258.9	0.960784
658	1.08088	20258.9	0.982759
659	0	70.1028	0.962964
660	7.32351	14779	0.977273
661	0	2168.23	0.950618
662	4.16176	21713.4	1
663	0	13245.8	0.030795
664	0	16.1618	0.786275
665	0	3232.01	1
666	0	4.16176	0.972222
667	1	20535.7	0.743566
668	3.08088	40066	0.47619
669	0	9676.81	0.835714
670	0	8828.79	0.875
671	2.08088	1452.49	0.146465
672	0	2178.65	0.559642
673	22.3235	29137.7	0.994624
674	0	20.8897	0.575375
675	0	12.5661	0.939655
676	0	522.505	0.903407
677	93.5586	14428.5	0.895833
678	612.793	27082.3	0.977453
679	0	674.263	0.925926
680	0	1192.15	0.5625
681	0	7086.99	0.404762
682	1	7086.99	1
683	7.24263	3753.86	0.968063
684	0	3.24263	0.928571
685	1.08088	7980.56	0.929539
686	0	18571.6	0.98422
687	0	14412.4	0.958333
688	24.647	14412.4	0.85
689	2	7403.65	0.888889
690	32.294	9725.98	0.958333
691	15.4044	6496.8	0
692	1	1297.67	0.607143
693	3.16176	5610.34	0.555556
694	0	12928.9	0.96875
695	0	11034.3	1
696	0	118789	0.666667
697	0	118789	0.4
698	0	8.24263	1
699	0	8.24263	0.444445
700	0	8.24263	0.592593
701	1.08088	8.24263	0.285714
702	0	8.24263	0.333333
703	0	457.131	1
704	0	457.131	0.663339
705	0	457.131	0.969947
706	0	7324.48	0.545454
707	2	178.985	1
708	0	178.985	0.6
709	0	124.419	0.908137
710	1	4969.26	0.6
711	0	4969.26	0.880749
712	2.08088	103572	0.973118
713	2	103572	0.935139
714	0	17877.7	0.987936
715	1.08088	607.344	0.857143
716	0	1170.21	0.813187
717	0	2	0.85755
718	0	8422.08	0.051282
719	0	8422.08	0.840375
720	1	8422.08	0.959592
721	12.4044	10827	1
722	14.7279	9741.02	0.983333
723	0	28745.8	0.964286
724	0	36014.9	0.5625
725	0	29732.6	0.872727
726	0	29732.6	0.977011
727	0	29732.6	0.555556
728	0	29732.6	1
729	5.16176	19851.3	0.949206
730	1.08088	6.48527	0.666667
731	0	8783.46	0.992
732	2.08088	9639.33	0.972789
733	0	9639.33	0.316993
734	0	2446.44	0.541667
735	0	2446.44	0.888889
736	1	34707.2	0.985777
737	1.08088	2859.04	0.809618
738	158.066	5463.44	0
739	1.08088	19839.4	0.0392056
740	4.08088	1654.85	0.990196
741	0	8.32351	0.938914
742	0	1374	0.980909
743	0	2545.88	0.926022
744	4.24263	32278.6	0.375
745	0	9377.73	0.971411
746	12.0809	21686	0.952381
747	0	21686	0.412699
748	0	108.154	0.76555
749	0	5672.51	0.969697
750	4.24263	7689.76	0.388889
751	0	27183.5	0.98718
752	2.08088	27183.5	0.875
753	0	27183.5	0.2
754	0	10639	0.979167
755	0	673.314	0.787406
756	0	673.314	0.733333
757	0	673.314	0.737107
758	0	8464.88	0.958333
759	0	0	0.333333
760	0	9637.32	0.980392
761	1	9637.32	0.948052
762	1	3143.96	0.992424
763	0	12892.3	0.361111
764	0	12892.3	0.777778
765	0	12892.3	0.583333
766	0	19918.4	0.930232
767	12.4853	13053.5	0.949253
768	5	18915.9	0.990196
769	5.24263	6694.42	0.95
770	0	950.505	0.989583
771	0	19.4044	0.989899
772	1.08088	4090.82	0.912772
773	0	2.16176	0.86449
774	0	2.16176	0.619048
775	0	2.16176	0.928571
776	0	2.16176	0.866092
777	0	2.16176	0.808743
778	0	0	1
779	0	0	0.916667
780	0	0	0.750831
781	0	0	0.845301
782	0	0	0.969697
783	0	0	1
784	0	0	0.944445
785	0	0	0.541667
786	0	0	0.222741
787	0	0	0.666667
788	0	0	0.125
789	0	0	0.854908
790	0	0	0.0410322
791	0	15.647	0.977273
792	0	15.647	0.969136
793	0	0	0.134943
794	2.08088	12323.3	0.968254
795	1	232.213	0.768348
796	0	1287.64	0.722466
797	0	12.7279	0.961538
798	9.48527	18215	0.666667
799	4.08088	167.624	0.954167
800	0	167.624	1
801	0	144581	0.678572
802	0	144581	0.957237
803	1.08088	694.02	0.967625
804	0	901.072	0.903846
805	0	9066.5	0.223214
806	1	5801.85	0.964286
807	29.5661	5801.85	0.959343
808	5.24263	5801.85	0.280629
809	0	18.8897	0.977272
810	0	18.8897	0.305555
811	4.08088	35810	0.984127
812	1	35810	0.888889
813	106.963	1090.42	0.65
814	0	2769.54	0.976415
815	5.24263	2055.8	1
816	1	12762	0.9781
817	1	12762	0.92963
818	1.08088	12762	0.785715
819	0	0	0.75
820	0	0	0.747165
821	0	0	0.416667
822	0	770.145	1
823	0	15075.3	0.777778
824	107.581	13212.9	0.0708333
825	0	2910.21	0.969697
826	0	2.16176	0.111111
827	0	83919.7	0.739538
828	0	83919.7	0.37963
829	1	11803.9	0.0667291
830	0	11803.9	0.972222
831	1	748.417	1
832	0	748.417	0.933333
833	0	748.417	0.866667
834	0	748.417	0.666667
835	0	0	0.722222
836	4.08088	35507.5	0.777778
837	0	35507.5	0.928571
838	0	2591.06	0.375
839	0	2591.06	0.992188
840	0	1985.67	0.583333
841	0	0	0.730769
842	0	928.799	0.4375
843	0	2.16176	0.637255
844	0	9.56615	0.980392
845	0	6022.73	0.636364
846	0	695.425	0.333333
847	0	695.425	0.888889
848	0	695.425	0.4
849	0	6.40439	0.666667
850	0	6.40439	0.962963
851	0	15762.9	0.5
852	2	24136.4	0.982456
853	1	24136.4	0.97037
854	0	24136.4	1
855	0	2635.56	0.416667
856	5.08088	2635.56	0.981481
857	4	30220.4	0.25
858	34.0514	30220.4	0.974992
859	0	30220.4	1
860	0	2767.34	0.559749
861	1.08088	2767.34	1
862	0	2767.34	0.555555
863	0	2767.34	0.153781
864	1	2767.34	0.962963
865	0	2767.34	0.90303
866	1	2568.23	0.333333
867	0	2568.23	0.944444
868	6.16176	11875.2	0.962141
869	20.9705	19054.6	0.973079
870	0	4527.73	0.822695
871	0	4527.73	0.985714
872	0	14655.2	0.876894
873	0	5766.11	0.915344
874	0	572.167	0.466071
875	0	3243.14	0.873435
876	1.08088	4817.28	0.777778
877	32.7279	19289.7	0.861111
878	0	19289.7	0.888889
879	0	19289.7	0.8378
880	0	2.16176	0.530303
881	311.911	9868.69	0.988504
882	2.08088	2237.94	0.740056
883	0	2237.94	0.266667
884	0	716.623	0.913004
885	0	146.654	0.988637
886	37.0219	320.006	0.97619
887	0	1	1
888	0	1	0.890625
889	0	1	0.466667
890	0	0	0.514875
891	0	4595.9	0.888889
892	0	4595.9	0.974359
893	0	711.264	0.9
894	0	711.264	0.111111
895	0	711.264	0.416667
896	2	22436.1	0.983333
897	5.08088	22436.1	0.985075
898	0	22436.1	0.983333
899	0	22436.1	0.947368
900	0	22436.1	1
901	15.7279	22436.1	0.5
902	0	7613.05	0.805556
903	0	7668.53	0.982394
904	0	7668.53	0.576923
905	1.08088	0	1
906	0	1944.62	0.9
907	0	1944.62	0.727612
908	0	6854.6	0.617284
909	0	25378.6	0.975342
910	0	838.954	0.888889
911	1.08088	838.954	0.802632
912	0	0	1
913	0	0	0.927778
914	0	0	0.267857
915	0	13268.4	0.25
916	0	13268.4	0.991667
917	0	13268.4	0.76166
918	0	4541.27	0.605263
919	29.3749	57641.6	0.840686
920	3.16176	10117.5	0.143321
921	1.08088	10117.5	0.952783
922	4.24263	10117.5	0.980676
923	0	10532.7	0.986928
924	1	22870	0.892857
925	0	22870	0.666667
926	1.08088	46013.2	0.583333
927	38.0514	46013.2	0.95
928	8	46013.2	0.454545
929	2.08088	46013.2	0.805556
930	13.5661	46013.2	0.946969
931	0	46013.2	0.877604
932	0	2454.37	0.931553
933	0	0	0.746421
934	0	0	0.877664
935	4	15024	0.791667
936	0	15024	0.965278
937	0	15424.2	0.75
938	1	15424.2	0.421279
939	0	15424.2	0.982758
940	0	12621.3	0.96
941	0	1.08088	0.787831
942	4.08088	2374.29	0.897436
943	0	2236.15	1
944	0	121979	0.768868
945	1.08088	121979	0.670817
946	0	28270.4	0.458333
947	0	28270.4	0.958375
948	3.08088	28270.4	0.555556
949	3	28270.4	1
950	2	28270.4	0.988095
951	1.08088	19695.6	0.90625
952	0	2551.98	0.857008
953	3.08088	67.2646	0.604167
954	0	1499.67	0.686275
955	1.08088	1499.67	0.843085
956	0	1499.67	0.625
957	0	1499.67	0.858333
958	0	0	0.804348
959	0	0	0.541667
960	0	0	0.644166
961	0	0	0.660714
962	0	0	0.658059
963	0	83.0953	0.837398
964	0	83.0953	0.979798
965	0	1331.89	0.669841
966	32.7793	53514.4	0.541667
967	1.08088	60.4263	0.9
968	151.389	60.4263	0.984127
969	2.08088	60.4263	0.859933
970	14.5661	72267.3	0
971	4.24263	72267.3	0.625
972	38.4558	741.344	0.324574
973	3	741.344	0.940789
974	3.16176	741.344	0.869048
975	0	0	0.263393
976	0	1.08088	0.784314
977	0	1.08088	0.600832
978	0	0	0.855555
979	1	600.219	0.958333
980	0	467.741	0.979482
981	0	0	0.555555
982	1	13204.1	0.777778
983	0	5353.62	0.972481
984	0	11195.9	0.919753
985	0	1258.73	0.933333
986	0	1258.73	0.766667
987	149.823	5796.15	0.92381
988	0	358.484	0.520833
989	1.08088	390.182	0.553459
990	0	390.182	0.980392
991	0	2.16176	0.983333
992	0	2.16176	0.993827
993	1.08088	2.16176	0.971428
994	0	2.16176	0.675934
995	1.08088	2.16176	0.943589
996	0	2.16176	0.973725
997	0	2.16176	0.666667
998	0	2.16176	0.466667
999	10.4044	2.16176	0.666667
1000	0	15.2426	0.973684
1001	0	15.2426	0.833333
1002	0	15.2426	0.941177
1003	0	15.2426	0.967742
1004	0	15.2426	0.583333
1005	0	21713.6	0.422223
1006	0	21713.6	0.968247
1007	0	21713.6	0.537415
1008	0	21713.6	1
1009	0	1917.9	1
1010	0	1917.9	0.347373
1011	0	1917.9	1
1012	0	1917.9	0.0251572
1013	0	1917.9	0.5
1014	64.6395	3256.17	0.933333
1015	0	2971.27	0.960526
1016	1	13826.9	0.946779
1017	0	13826.9	0.944445
1018	0	7097.29	0.467321
1019	1	7097.29	0.777778
1020	0	0	1
1021	0	863.145	0.541667
1022	0	4044.67	0.666667
1023	0	48389.4	0.978261
1024	0	48389.4	0.977012
1025	0	9343.72	0.958333
1026	0	9343.72	0.980769
1027	0	9343.72	0.958333
1028	0	9343.72	1
1029	1.08088	9343.72	1
1030	0	9343.72	0.170426
1031	0	9343.72	0.779762
1032	0	9343.72	0.973333
1033	19.3235	15.2426	0.34375
1034	0	15.2426	0.944444
1035	0	15.2426	0.744445
1036	1.08088	1213.14	1
1037	0	1213.14	1
1038	11.8897	10839	0.225
1039	0	17244.9	0.935606
1040	0	2511.45	1
1041	0	42871.3	0.99177
1042	0	42871.3	0.666667
1043	0	42871.3	0.978877
1044	159.228	42871.3	0.666667
1045	24.647	42871.3	0.975319
1046	0	4469.02	0.866667
1047	0	14233.4	0.976559
1048	0	11.5661	0.601493
1049	0	11441	0.958333
1050	2	19822	0.0251602
1051	5.08088	19822	0.416666
1052	2	599.182	0.966028
1053	0	5.16176	0.801557
1054	0	3071.02	1
1055	1	3071.02	1
1056	0	5068.26	0.594203
1057	2	11571.6	0.952175
1058	0	12386.7	0.966667
1059	0	11922.3	0.764286
1060	0	2355.88	0.834615
1061	0	108.389	0.944444
1062	3.08088	125943	0.969298
1063	0	125943	0.6
1064	0	11668.1	0.985507
1065	0	7446.97	0.333333
1066	0	500.808	0.25
1067	1	11.647	0.626499
1068	0	20015.3	0.777778
1069	0	56917.2	0.944445
1070	1	17836.8	0.777778
1071	0	17836.8	0.444444
1072	0	17187.9	0.921923
1073	0	17187.9	0.714285
1074	0	17187.9	0.983333
1075	1	17187.9	1
1076	3.08088	9945.64	0.950617
1077	0	709.027	0.918699
1078	0	709.027	0.65
1079	0	709.027	0.620425
1080	1.08088	68820.8	0.361111
1081	1.08088	3.16176	1
1082	0	3.16176	0.914773
1083	0	92.9336	0.905172
1084	22.7279	47500.7	0.0192308
1085	1334.06	12089	1
1086	0	22.9705	0.733333
1087	0	1.08088	0.9
1088	0	46556.6	0.466667
1089	0	11619.3	0.25
1090	0	4084.03	0.984375
1091	0	54.9411	0.966283
1092	0	5434.33	1
1093	3.16176	2886.78	0.868421
1094	12.1618	30025.4	0.420875
1095	0	136.25	0.97687
1096	0	7738.79	0.571429
1097	1	15593.1	0.981818
1098	0	9139.29	0.611111
1099	0	0	0.824167
1100	0	9817.32	1
1101	0	9817.32	0.929646
1102	0	1.08088	0.954545
1103	0	3829.21	0.990741
1104	0	3829.21	0.931624
1105	2.08088	3829.21	0.625
1106	1.08088	21347.1	0.866667
1107	0	1570.22	0.9
1108	0	18974.3	0.333333
1109	7.48527	18974.3	0.660494
1110	0	18974.3	0.95584
1111	0	56944.3	0.931942
1112	0	712.579	1
1113	0	27620.2	1
1114	0	23348.9	0.967239
1115	0	8058.95	0.95
1116	0	8058.95	0.861111
1117	0	149.904	0.574786
1118	0	149.904	0.990741
1119	1.08088	210501	0.972222
1120	1	210501	0.333334
1121	2	210501	0.383428
1122	0	0	0.912281
1123	0	2129.78	0.973958
1124	0	3398.66	0.611438
1125	0	54.6984	0.8
1126	1.08088	43099.7	0.944444
1127	0	4865.53	0.921432
1128	1	4779.15	0.968992
1129	3	162.36	1
1130	25.9705	109.713	0.929778
1131	0	132.308	0.466667
1132	0	2695.94	0.972081
1133	0	8.32351	0.416667
1134	9.08088	4786.3	0.281481
1135	1	15.9705	0.833333
1136	7.40439	35423.4	0.954861
1137	0	15888.4	0.481481
1138	0	17843.5	0.0833333
1139	4.16176	88559.8	0.952381
1140	1.08088	88559.8	0.97619
1141	0	14628.2	0.865097
1142	1	22445.7	0.975
1143	0	9322.03	0.222222
1144	3.24263	9322.03	1
1145	0	8852.46	0.833333
1146	0	8852.46	0.974601
1147	0	219.94	0.444445
1148	31.8897	53514.1	0.92735
1149	0	10724.7	0.558494
1150	0	2435.42	0.981395
1151	0	3611.31	0.666667
1152	27.1323	9819.01	0.736923
1153	5.16176	8882.44	0.975535
1154	0	8882.44	0.977777
1155	4	8882.44	0.444444
1156	3.16176	8882.44	0.677083
1157	3.16176	1947.52	0.474748
1158	6.40439	21733.7	1
1159	8.08088	6480.72	0.96
1160	2.08088	5588.27	0.615385
1161	59.2646	101001	0.558371
1162	0	101001	0.974095
1163	0	5723.05	0.687136
1164	49.2646	45061.8	0.25
1165	1.08088	2129.38	0.6875
1166	0	0	0.898026
1167	0	2.16176	0.541666
1168	0	2.16176	0.826667
1169	1.08088	2.16176	0.222222
1170	1.08088	2.16176	0.535575
1171	0	30054.7	0.625
1172	0	30054.7	0.888889
1173	2	2399.19	0.974359
1174	1.08088	12900.5	0.873923
1175	0	9725.91	0.333333
1176	0	48374.4	0.5
1177	0	6070.96	0.97973
1178	1	6070.96	0.982759
1179	0	331.735	0.875
1180	1	29347.6	0.964912
1181	0	11865.1	0.929091
1182	0	11865.1	0.984615
1183	0	476.293	0.94086
1184	0	476.293	0.602397
1185	0	476.293	0.760417
1186	0	203.779	0.663793
1187	0	29359.7	0.365215
1188	0	6.16176	0.416667
1189	0	39690.3	1
1190	0	12218.2	0.945034
1191	17.5661	234169	0.92409
1192	25.1323	234169	0.555556
1193	123.529	5321.4	1
1194	1	14510.3	0.222222
1195	0	34359	0.666667
1196	12.2426	18929.1	0.190476
1197	28.2132	45583.4	0.970573
1198	0	8396.48	0.877193
1199	0	8396.48	0.974658
1200	1	11169.7	0.964046
1201	0	19403.3	0.90015
1202	5.16176	19403.3	0.978788
1203	0	19403.3	0.965517
1204	1.08088	1.08088	0.333333
1205	1	7675.63	0.5
1206	0	50051.3	0.957265
1207	0	74.3674	0.959487
1208	12.4853	44548.9	1
1209	1.08088	8378.9	0.887107
1210	3.16176	1622.52	0.5
1211	17.4853	10052.6	0.984401
1212	0	10052.6	0.940171
1213	1	20512.9	0.963534
1214	0	26961.8	0.932084
1215	0	46584.5	0.485714
1216	3	46584.5	0.971015
1217	0	1	0.527778
1218	0	13.8897	0.325
1219	2.08088	262712	0.0454543
1220	0	15109.8	0.932908
1221	0	15109.8	0.713021
1222	10.2426	15109.8	0
1223	0	15109.8	0.79057
1224	3.24263	1201.78	0.226877
1225	0	4644.75	0.3125
1226	0	794.042	0.911774
1227	2.08088	6744.48	0.598214
1228	0	18.0514	1
1229	0	16593.6	0.791667
1230	4.08088	20435.8	0.875
1231	1.08088	9441.78	1
1232	24.8897	38915.4	0.991177
1233	5.16176	48240.4	0.658971
1234	2.08088	36942.9	0.166667
1235	709.373	55610.9	0.070959
1236	8.40439	21866.2	0.979247
1237	0	21866.2	0.842857
1238	7.32351	4309.2	0.969697
1239	1.08088	7371.73	0.666667
1240	2.08088	3857.26	0.877193
1241	0	1.08088	0.865385
1242	0	165.463	0.222222
1243	1.08088	45888.8	0.666667
1244	10.2426	45888.8	0.88697
1245	1	16880.9	0.96875
1246	0	1131.09	0.933333
1247	1.08088	5509.43	0.666667
1248	5	7677.76	0.981482
1249	1.08088	9921.72	0.638889
1250	20.0514	55212.4	0.99187
1251	1.08088	0	0.84053
1252	0	0	0.595238
1253	0	341.565	0.8125
1254	0	1.08088	0.583333
1255	221.698	21444.4	0.943254
1256	225.705	49975.9	0.0310439
1257	1.08088	13.3235	0.866667
1258	5.40439	6061.04	0.939922
1259	11.4853	6061.04	0.924508
1260	75.6395	6061.04	0.675
1261	3.08088	34099.5	0.964286
1262	1.08088	34099.5	0.972222
1263	1	7628.35	1
1264	0	7628.35	0.994565
1265	0	84646.2	0.666667
1266	5.24263	9169.8	1
1267	3.16176	18908.7	0.333333
1268	0	24748	0.86715
1269	0	24748	0.785311
1270	0	24748	0.94913
1271	1	3214.59	0.983262
1272	1	60557.2	0.974138
1273	0	10984.7	0.444445
1274	1	10517.4	0.958889
1275	4.08088	10517.4	1
1276	0	18496.1	0.937164
1277	0	194.183	0.975275
1278	1.08088	11854.8	0.982031
1279	1.08088	4351.75	0.166667
1280	0	78.4778	0.305555
1281	5.16176	44388.5	0.388051
1282	9.16176	28939.9	0.530903
1283	0	28939.9	0.5
1284	2	13665.7	0.987654
1285	9.40439	93079.9	0.782513
1286	2	19877.1	0.956688
1287	2.08088	4742.91	0.910714
1288	0	11343.9	0.416666
1289	0	2227.44	0.233333
1290	0	2227.44	0.432901
1291	0	0	0.655556
1292	0	0	0.423077
1293	0	1106.03	0.833333
1294	0	1683.36	0.836364
1295	0	1579.62	0.684053
1296	0	0	0.675
1297	0	0	0.982906
1298	0	0	0.454546
1299	0	0	0.85
1300	0	0	0.6
1301	0	0	0.7
1302	0	0	0.965976
1303	0	0	0.953073
1304	0	0	0.971591
1305	0	0	0.833333
1306	0	0	0.391534
1307	0	4940.47	0.956834
1308	1	10935.3	0.98264
1309	1	5475.34	1
1310	0	0	0.806036
1311	0	153.624	1
1312	0	153.624	0.650762
1313	0	62.5586	0.791667
1314	1.08088	2316.59	0.222222
1315	5	7007.39	1
1316	4.16176	7007.39	0.973404
1317	0	1.08088	0.888889
1318	0	1.08088	0.875
1319	0	1.08088	0.583333
1320	0	54981.3	0.986456
1321	0	54981.3	0.96296
1322	8.24263	54981.3	0.991379
1323	0	163.632	0.66
1324	2	39482.2	0.199561
1325	1.08088	3937.31	0.962963
1326	0	15810.8	0.904762
1327	0	10567.9	0.62963
1328	1	5453.58	0.962755
1329	1	144645	0.542857
1330	0	1954.27	0.956092
1331	0	1954.27	0.911859
1332	0	1954.27	1
1333	0	0	0.976191
1334	0	0	0.909889
1335	0	0	0.5
1336	0	0	0.993421
1337	0	0	0.95
1338	0	0	0.972222
1339	0	0	0.55303
1340	0	0	0.925
1341	0	0	0.888889
1342	0	0	0.923027
1343	1	0	0.969231
1344	0	0	1
1345	0	0	0.988506
1346	0	27962.7	0.75
1347	0	27962.7	0.922605
1348	0	27962.7	0.958333
1349	1	27962.7	0.333333
1350	0	27962.7	0.877778
1351	0	13401.6	0.444444
1352	0	13401.6	0.888889
1353	0	31.1323	0.922426
1354	0	464.124	0.573643
1355	0	6.24263	0.414141
1356	0	6624.62	0.5
1357	0	6624.62	0.937879
1358	0	3392.64	0.939203
1359	0	193.801	0.35
1360	1.08088	193.801	0.214286
1361	0	193.801	0.969231
1362	4.24263	780.123	0.915379
1363	0	780.123	0.467593
1364	2.16176	780.123	0.496324
1365	0	780.123	0.996226
1366	0	42.6176	0.984453
1367	1	8949.44	0
1368	0	5713.66	0.952381
1369	3.16176	6146.35	0.729167
1370	13.4044	31324.8	0.973545
1371	10.8088	31324.8	0.666667
1372	0	65.5072	0.333333
1373	7.56615	39668.4	0.96
1374	21.647	11469.2	0.25
1375	0	24752	0.2
1376	0	16.647	0.516667
1377	9.32351	28980	0.95
1378	6.40439	28980	0.916667
1379	0	28980	0.0394315
1380	4.16176	28980	0.458333
1381	0	47185.4	0.555556
1382	0	16243.4	0.965316
1383	1.08088	16243.4	0.25
1384	2.08088	16243.4	0.980392
1385	0	16243.4	0.916667
1386	0	16243.4	0.978389
1387	0	0	0.54657
1388	0	0	0.852941
1389	1	0	0.641342
1390	0	0	0.140692
1391	0	0	0.833333
1392	0	0	0.738525
1393	0	3.08088	0.725
1394	0	4070.03	0.985714
1395	1.08088	61.8602	0.950538
1396	93.1028	56012.7	0.922222
1397	65.8307	0	0.597701
1398	0	0	0.774154
1399	0	0	0.809524
1400	0	0	0.314465
1401	0	18.8897	0.866667
1402	0	0	0.960862
1403	0	3.08088	0.992308
1404	78.3455	0	0.825108
1405	0	4.24263	0.886111
1406	4.16176	4.24263	0.927083
1407	3.08088	2908.12	0.558769
1408	76.7498	2908.12	0.911111
1409	0	1984.93	0.866667
1410	0	30367	0.972973
1411	42.4558	30367	0.0833333
1412	55.1323	30367	0.979539
1413	1	437332	0.978261
1414	2.08088	6388.34	0.31746
1415	1	2060.65	0.921053
1416	0	14689.6	0.86508
1417	1.08088	4641.16	0.716667
1418	5.08088	79623.5	0.915151
1419	6.16176	79623.5	0.222222
1420	1.08088	5254.84	0.933333
1421	4.16176	5254.84	0.610256
1422	6.24263	18557	0.968656
1423	10.4044	13951.1	0.888889
1424	0	38971.8	0.916667
1425	68.0734	27590.8	0.555555
1426	1.08088	447.014	0.777778
1427	1.08088	16618.8	1
1428	0	388.286	0.941099
1429	64.2351	9299.73	0.978871
1430	3.24263	30878.9	0.833333
1431	54.0219	4134.33	0.802469
1432	8	441.411	0.923423
1433	0	10207.7	0.96124
1434	0	10207.7	0.948718
1435	3.16176	5917.85	0.6875
1436	5.08088	531.55	0.986111
1437	0	531.55	0.992188
1438	0	39300.8	0.333333
1439	0	25727.2	0.5
1440	0	19269.4	0.757576
1441	2	19269.4	0.0182683
1442	0	23042.7	0.891346
1443	0	15410.5	0.974383
1444	0	15410.5	0.451851
1445	0	15410.5	0.823658
1446	0	18800.6	0.962963
1447	2.16176	18800.6	0.992248
1448	4.24263	556.514	0.957447
1449	56.5881	2645.72	0.947917
1450	79.1542	2645.72	0.973684
1451	13.647	21839.4	0.974843
1452	89.7498	611.763	1
1453	0	9182.81	0.962254
1454	1	11.7279	0.897448
1455	0	11.7279	0.965116
1456	0	11.7279	0.965517
1457	0	1206.25	0.900966
1458	0	1206.25	0.987179
1459	7.48527	1206.25	0.333333
1460	0	23852.5	0.985714
1461	0	23852.5	0.988304
1462	0	23852.5	0.973793
1463	7.48527	23852.5	0.962847
1464	18.9705	6726.51	0.557226
1465	0	0	0.807692
1466	91.0144	23830	0.4
1467	1.08088	9486.94	1
1468	0	10086.9	0.850877
1469	0	52579.4	0.0833333
1470	16.647	52579.4	0.733333
1471	0	41898.1	0.979796
1472	5	28171.2	0.569445
1473	1	11785.7	0.400866
1474	2.16176	7855.88	0.958333
1475	0	258.007	0.423913
1476	0	12834.4	0.275
1477	1	52544.6	1
1478	0	0	0.416667
1479	3.16176	31000.4	0.988095
1480	7.40439	31000.4	1
1481	0	5947.71	0.791029
1482	1	5947.71	0.805556
1483	0	5947.71	0.927976
1484	56.1542	14633.6	1
1485	1	576.682	0.936364
1486	0	387.036	0.470833
1487	0	4751.5	0.991228
1488	46.669	4751.5	0.568182
1489	4.24263	10106.4	0.613327
1490	0	7874.99	0.964286
1491	1	4530.82	1
1492	12.8088	9322.39	0.0305392
1493	1	3320.4	1
1494	0	477.801	0.9375
1495	2.08088	4361.92	0.888889
1496	30.8088	5184.1	0.951219
1497	0	7491.71	0.015873
1498	1.08088	7491.71	0.284553
1499	0	4594.58	0.333333
1500	3	4594.58	0.888889
1501	1	10866.3	0.966667
1502	0	13352.9	0.961538
1503	0	18362.6	1
1504	1	18362.6	0.766414
1505	4.16176	161.308	0.291667
1506	60.316	20465.4	1
1507	1	24195.6	0.964286
1508	8.48527	3357.81	0.35
1509	0	10108.5	0.954545
1510	0	4	1
1511	0	4	0.933333
1512	0	4	0.473595
1513	1.08088	0	0.650794
1514	2.08088	23947	0.978723
1515	0	59.7204	0.950691
1516	0	59.7204	0.624882
1517	0	59.7204	0.830104
1518	1	8333.12	0.963708
1519	0	8333.12	1
1520	0	36.3749	0.940477
1521	0	18309.9	0.857208
1522	0	3.16176	0.94552
1523	0	3.08088	0.627381
1524	0	49.9116	0.94877
1525	0	463.315	0.962963
1526	0	463.315	0.746032
1527	1.08088	12985.8	0.595238
1528	0	2685.67	0.82353
1529	1	2685.67	0.869979
1530	0	3893.15	0.416667
1531	0	3893.15	0.931842
1532	0	0	0.847674
1533	0	0	0.617155
1534	0	0	0.583333
1535	0	0	0.75
1536	0	0	0.908143
1537	0	0	0.939394
1538	0	0	0.921777
1539	0	4863.77	0.942529
1540	0	2.16176	0.985816
1541	0	1	0.726745
1542	0	1	0.683333
1543	0	2.16176	0.92
1544	0	1729.87	0.429644
1545	0	1	0.985714
1546	0	26350.7	0.666667
1547	1.08088	16713.9	0.323099
1548	0	181.514	0.965686
1549	0	0	0.971015
1550	0	0	0.963214
1551	0	0	0.444445
1552	0	0	0.460526
1553	1	16030.8	1
1554	0	16030.8	0.98121
1555	35.1323	13778.2	1
1556	0	11966.2	0.592593
1557	0	11966.2	0.958333
1558	0	24555.2	0.834832
1559	0	0	0.933398
1560	0	23444.7	0.985507
1561	1	23444.7	0.400662
1562	2.16176	23444.7	0.8
1563	0	4.16176	0.905526
1564	2	9381.18	1
1565	0	12307.3	0.97419
1566	0	12307.3	0.926946
1567	0	3.24263	0.916667
1568	0	0	0.333333
1569	0	0	1
1570	1.08088	63.669	0.555556
1571	0	63.669	0.725
1572	0	2	0.261457
1573	1.08088	11779.6	0.111111
1574	0	13717.3	0.887517
1575	2	9042.31	0.450605
1576	106.691	2	0.70098
1577	2.08088	38420.1	0.822222
1578	10.4044	38420.1	0.975997
1579	5.16176	26779.3	0.666667
1580	1.08088	26779.3	0.111111
1581	0	30.4558	0.985988
1582	1	13185.8	0.512987
1583	0	0	0.965278
1584	3.08088	64757.8	0.958333
1585	1	615.234	0.282051
1586	0	615.234	0.416667
1587	4.24263	615.234	0.955534
1588	0	1242.86	0.973173
1589	7.32351	45.4558	0.976136
1590	0	12655.1	1
1591	0	0	1
1592	0	0	0.466667
1593	0	0	0.166667
1594	1	2200.94	0.9583
1595	1.08088	2719.25	0.75
1596	0	0	0.833333
1597	0	8.32351	0.666667
1598	2.16176	626.557	0.925926
1599	261.676	6968.44	0.992647
1600	0	3905.92	0.979167
1601	0	2616.88	0.909091
1602	0	2616.88	0.894737
1603	0	0	0.80303
1604	0	66.4263	0.92647
1605	1	0	0.432845
1606	0	0	0.35321
1607	0	0	0.0346379
1608	0	0	0.520635
1609	0	0	0.55
1610	0	0	0.71732
1611	0	15532.5	0.897052
1612	81.6395	15532.5	0.971752
1613	2.08088	4931.63	0.333333
1614	1	6.24263	0.376667
1615	0	56211.5	0.820513
1616	6.24263	6316.47	0.0181964
1617	0	6316.47	0.444445
1618	0	14442.3	0.976191
1619	1	14442.3	0.333333
1620	0	7635.64	0.662923
1621	0	84.963	1
1622	9.48527	11001.9	0.569577
1623	1	11001.9	0.795193
1624	1.08088	10645.1	0.941422
1625	1	3028.68	0.541667
1626	0	0	0.833333
1627	1	0	0.514248
1628	0	0	0.949495
1629	0	5187.04	0.985816
1630	0	2	0.954546
1631	0	0	0.84375
1632	0	343.58	0.944469
1633	0	1500.73	0.2
1634	2.08088	17.1618	0.452815
1635	269.051	11695.7	0.666667
1636	0	0	0.962764
1637	0	0	0.555556
1638	0	0	0.833333
1639	0	17.7279	0.969697
1640	0	17.7279	0.166667
1641	0	7.24263	0.875
1642	0	7.24263	0.933333
1643	1	7.24263	0.6
1644	0	7.24263	1
1645	0	7.24263	0.555556
1646	0	1123.25	0.943841
1647	0	1123.25	0.852986
1648	3.16176	1123.25	0.772222
1649	3.08088	1123.25	0.982143
1650	1.08088	1123.25	0.0833333
1651	32.294	1123.25	0.0636486
1652	0	8812.58	0.962614
1653	21.8088	8812.58	0.972222
1654	0	0	0.222222
1655	0	55.7498	0.609756
1656	0	55.7498	0.416667
1657	1	8.64702	0.895014
1658	19.1323	4071.6	0.968254
1659	0	305.543	0.952381
1660	0	11.3235	0.705479
1661	1.08088	0	0.0528426
1662	0	8.64702	0.856307
1663	0	0	0.7
1664	49.5072	4591.93	0.959596
1665	92.0953	0	0.51925
1666	1	0	0.75
1667	0	4342.87	0.19697
1668	0	39.2646	0.583333
1669	20.8897	19361.3	0.979299
1670	0	19361.3	0.944504
1671	0	19361.3	0.955942
1672	21.294	40300.7	0.897436
1673	8.40439	180.088	0.507936
1674	0	19333.9	0.766667
1675	0	19333.9	0.949713
1676	0	3.08088	0.833333
1677	21.3749	12.8897	0.63141
1678	0	12.8897	0.266667
1679	1	12363.3	0.761905
1680	1	11.2426	0.964286
1681	1	11.2426	0.909091
1682	0	11.2426	0.973684
1683	0	11.2426	0.833333
1684	0	11.2426	0.974359
1685	0	4.08088	1
1686	9.24263	11301.4	0.983334
1687	11.2426	11301.4	0.657658
1688	1	11301.4	0.986111
1689	2.08088	11301.4	0.560913
1690	0	11301.4	0.980375
1691	0	10662	0.965517
1692	4.24263	10662	0.981481
1693	0	127.823	0.685572
1694	0	12903.2	0.970238
1695	0	13409.3	0.0833333
1696	0	13409.3	0.746667
1697	0	0	0.744
1698	0	0	0.808645
1699	0	0	0.75
1700	29.6984	128.206	0.996
1701	4.16176	3964.24	1
1702	0	1	0.936314
1703	0	1	0.975757
1704	0	1	0.283333
1705	0	3549.84	0.70934
1706	0	9913.08	0.65
1707	0	9913.08	0.938272
1708	0	20355.4	0.680555
1709	3	202.808	0.963768
1710	0	14432.5	0.97619
1711	0	1574.58	0.890351
1712	0	49.3455	0.666667
1713	0	15752.5	0.2
1714	0	20285.8	0.987879
1715	6	20285.8	0.988889
1716	0	351.992	0.880952
1717	0	351.992	0.777778
1718	0	9501.11	0.958334
1719	3.08088	9501.11	0.8125
1720	0	9501.11	1
1721	0	9501.11	0.971429
1722	0	2537.05	0.222222
1723	0	2537.05	0.934395
1724	1	2537.05	0.275
1725	0	2537.05	0.805556
1726	0	2537.05	0.940145
1727	0	12255.6	0.777778
1728	0	0	0.733334
1729	0	0	0.760869
1730	0	0	0.455135
1731	3	955.733	0.687406
1732	0	591.513	0.970503
1733	0	6134.22	0.656309
1734	1.08088	6134.22	0.664828
1735	1	192.646	0.966667
1736	0	3.24263	0.948718
1737	0	1380.7	1
1738	1.08088	1380.7	1
1739	0	5364.68	0.575758
1740	7.16176	2116.87	0.777778
1741	0	186.007	0.0833332
1742	0	186.007	1
1743	0	186.007	0.98192
1744	0	25869.9	0.979798
1745	0	25869.9	1
1746	0	25869.9	0.947475
1747	10.5661	39924.3	0.0548015
1748	0	39924.3	0.984848
1749	0	190.522	0.97619
1750	0	6557.58	0.777778
1751	0	6557.58	0.975904
1752	89.0144	66758.8	0.98077
1753	2.16176	20067.2	0.444444
1754	22.4853	20067.2	0.488943
1755	0	7952.8	0.913448
1756	0	4217.03	0.333333
1757	3.16176	730.395	1
1758	5	68.9925	0.877778
1759	1.08088	71037.2	0.975
1760	0	71037.2	0.666667
1761	0	9073.96	0.333333
1762	2.16176	673.895	0.981491
1763	0	673.895	0.922619
1764	0	2025.72	0.888889
1765	0	48027	0.968254
1766	5	9952.79	0.981481
1767	0	37489.7	0.986111
1768	1.08088	31344.2	0.983333
1769	1.08088	31344.2	0.951412
1770	0	34.647	0.8
1771	3.08088	22983	0.93997
1772	0	26962	0.984849
1773	0	26962	0.444444
1774	7.24263	7400.41	0.25
1775	328.374	580.668	1
1776	0	13360.4	0.437909
1777	4.24263	14220.7	0.969697
1778	0	18.8088	0.933549
1779	0	0	0.578217
1780	0	893.182	0.860606
1781	0	893.182	0.754663
1782	2.08088	893.182	0.9801
1783	0	893.182	0.888889
1784	0	893.182	0.444444
1785	0	31.6176	0.966667
1786	0	0	0.975
1787	4.32351	96245.7	0.00775193
1788	0	42311.7	0.983333
1789	6.24263	25323.7	0.916667
1790	0	6.32351	0.944444
1791	0	27872.2	0.795904
1792	2.08088	27872.2	1
1793	0	50.3455	0.761905
1794	0	0	1
1795	0	13332.6	0.807408
1796	0	6310.93	0.945694
1797	0	18709.3	0.2
1798	4.32351	18709.3	0.0156863
1799	0	0	0.8375
1800	0	0	0.488889
1801	0	3133.21	0.98
1802	1	39795.2	0.980603
1803	86.8013	1494.32	0.905039
1804	0	75.0953	0.897778
1805	0	329.043	0.967742
1806	3	10456.6	0.955841
1807	11.4853	8960.82	1
1808	0	25419.1	0.925926
1809	0	25419.1	0.977778
1810	11.4853	27527	1
1811	25.8897	27527	0.8
1812	100.448	69111	0.956521
1813	0	617.057	0.952097
1814	1	121.257	0.966667
1815	8.16176	4279.23	0.6
1816	0	108.559	0.972222
1817	0	89.5586	0.4
1818	0	4802.05	0.583333
1819	6.32351	38221.9	0.5
1820	0	59.8821	0.888889
1821	0	6971.5	1
1822	0	0	1
1823	0	1642.35	0.951638
1824	0	42.1837	0.88586
1825	0	42.1837	0.952381
1826	0	42.1837	0.5
1827	0	42.1837	0.991667
1828	1.08088	18906.7	1
1829	0	2994.89	0.939394
1830	3	9131.52	0.640625
1831	0	7.48527	0.899225
1832	0	7.48527	0.962264
1833	0	7.48527	0.968972
1834	1	7.48527	0.975
1835	0	16373.4	0.843264
1836	1.08088	11600.7	0.222222
1837	2	11600.7	0.466667
1838	8.32351	18717.4	0.9692
1839	0	13191	0.954167
1840	5	13191	0.986395
1841	0	34.8088	0.811309
1842	50.5367	34.8088	0.5625
1843	0	0	0.903704
1844	0	4197.02	0.98
1845	27.7279	18987.3	0.980952
1846	0	0	0.566667
1847	0	18.7279	0.47125
1848	0	18.7279	1
1849	0	0	0.0617284
1850	0	1977.17	0.598246
1851	0	4261.96	0.952381
1852	2	4261.96	0.827586
1853	0	4261.96	0.952381
1854	0	4261.96	0.848148
1855	0	0	0.973447
1856	0	49.5881	1
1857	0	30601.1	0.974359
1858	1	70885.1	0.979167
1859	0	70885.1	0.423333
1860	0	70885.1	0.416667
1861	0	70885.1	0.96875
1862	0	81499	0.9875
1863	0	11019.7	1
1864	0	5.16176	0.259259
1865	0	5.16176	0.958333
1866	0	586.91	0.986515
1867	0	7212.29	0.73386
1868	0	2	0.583333
1869	0	4.32351	0.978253
1870	0	4.32351	0.75
1871	0	4.32351	0.466667
1872	0	7.48527	0.977273
1873	0	7.48527	1
1874	0	7.48527	0.961749
1875	0	7.48527	0.84844
1876	0	10888.4	0.944444
1877	369.183	63012.9	0.897436
1878	762.549	47056.1	0.0889057
1879	0	0	0.982143
1880	0	0	0.701149
1881	0	58.669	0.951905
1882	0	12.7279	0.977097
1883	0	12.7279	0.666667
1884	0	4735.1	0.466667
1885	0	0	0.988889
1886	1	9660.88	0.897058
1887	4.24263	2316.19	0.933333
1888	0	2123.13	1
1889	0	336.742	0.791667
1890	0	336.742	0.950943
1891	0	6395.33	0.222222
1892	0	1800.54	0.754386
1893	0	7043.48	0.50974
1894	0	7043.48	0.89125
1895	0	0	0.970683
1896	0	9.16176	0.979167
1897	1	11723.3	0.981132
1898	0	67714.3	0.933333
1899	0	6862.76	0.933333
1900	1	6862.76	0.982456
1901	0	63.5072	0.989418
1902	0	63.5072	0.96151
1903	0	21.294	0.935897
1904	1	7017.28	0.977778
1905	0	7017.28	0.0178571
1906	0	87.0953	0.781145
1907	0	14754.3	0.967213
1908	17.0514	9812.3	0.0178078
1909	2.08088	623.697	0.666667
1910	0	5.40439	0.895117
1911	2	8521.89	0.966667
1912	0	9.32351	0.967742
1913	1	3.16176	0.975
1914	7.24263	16312.5	1
1915	0	2.16176	0.716184
1916	0	249.021	0.1875
1917	11.647	85117.9	0.8125
1918	4.24263	3207.1	0.777778
1919	0	3207.1	0.886244
1920	0	2612.1	0.982738
1921	2.08088	10719.4	0.980392
1922	2.08088	6910.52	0.89237
1923	0	4506.66	0.941177
1924	0	23750.5	0.533333
1925	5.16176	23750.5	0.889787
1926	0	2998.12	0.75
1927	0	12.2426	0.925926
1928	0	3637.52	0.815443
1929	0	3637.52	0.222222
1930	1	28130.9	0.975362
1931	0	47.5367	0.978261
1932	4.24263	7150.77	0.46
1933	0	5201.57	0.75
1934	1	8953.54	0.977833
1935	1	5699.31	0.5
1936	8.24263	16270	1
1937	0	20182	0
1938	1	25345.4	0.638806
1939	2	25345.4	0.5
1940	0	25345.4	0.916906
1941	0	8417.9	0.8
1942	2.16176	26163.4	1
1943	16.3235	26163.4	1
1944	0	15040.6	0.981182
1945	11.1618	37957	0
1946	0	63.1028	0.810884
1947	75.2646	51660.8	0.988095
1948	4.08088	51660.8	0.017612
1949	0	1447.36	0.881629
1950	3.24263	14749.4	0.779166
1951	1	14749.4	0
1952	10.2426	11205.9	0.9
1953	0	11205.9	0.333333
1954	0	19.5661	0.610422
1955	0	0	0.729167
1956	0	0	0.416667
1957	0	87967.8	0.933333
1958	0	87967.8	0.955914
1959	0	565.932	0.944444
1960	0	89.9336	0.957265
1961	0	2354.26	1
1962	0	2354.26	0.925926
1963	0	2354.26	0.941667
1964	37.6984	7942.77	0.952778
1965	4.08088	35041.9	0.936937
1966	0	0	0.779865
1967	2.08088	3675.43	0.966666
1968	2.08088	6149.54	0.955862
1969	2.16176	20048	0.982539
1970	0	752.431	0.661905
1971	0	6813.32	0.387614
1972	4.24263	207.705	0.666667
1973	7.24263	10694.7	0.666667
1974	0	10694.7	0.533333
1975	1.08088	10694.7	0.965984
1976	0	75.7204	0.969697
1977	1.08088	1320.56	0.666667
1978	1	1320.56	0.8125
1979	1.08088	1320.56	0.988095
1980	43.0219	4992.73	0.416667
1981	5.08088	12319.8	0.930027
1982	0	54892.7	1
1983	0	54892.7	0.320513
1984	0	11632.4	0.410714
1985	0	16409	0.964285
1986	0	16409	0.666667
1987	0	6897.75	0.957143
1988	1	6897.75	0.666667
1989	5.32351	77.6395	0.967742
1990	3.16176	77.6395	0.377778
1991	0	77.6395	0.888889
1992	0	1098.25	0.932044
1993	2	2615.49	0.444445
1994	7.56615	2615.49	0.868522
1995	1	23069.4	0.992
1996	0	18.9705	0.963938
1997	0	18.9705	0.968062
1998	64.9116	1738.36	0.940079
1999	89.0439	9920.22	0.167634
[truncated: 7,340 more rows]

## Sheet: Alu annotation
Id	repeat chromosome	repeat start	repeat end	repeat name	repeat strand	repeat length	closest gene chromosome	closest gene start	closest gene end	closest gene strand	closest gene expression (read count)	closest gene ensg identifier	repeat to closest gene distance (0 if overlap)	repeat average methylation beta value	hmar chromosome	hmar start	hmar end	hct hmar tag
1	1	713290	713429	AluJo_dup28_1:713290-713429	+	140	1	621099	622034	-	0	ENSG00000185097	-91257	0.793651	1	532833	4114512	no_hmar
2	1	713443	713574	AluJo_dup29_1:713443-713574	-	132	1	621099	622034	-	0	ENSG00000185097	91410	0.796296	1	532833	4114512	no_hmar
3	1	918836	919099	AluSq2_dup40_1:918836-919099	-	264	1	911555	917497	-	8	ENSG00000187642	1340	0.925926	1	532833	4114512	no_hmar
4	1	920274	920552	AluSz_dup31_1:920274-920552	-	279	1	911555	917497	-	8	ENSG00000187642	2778	0.9656	1	532833	4114512	no_hmar
5	1	925366	925677	AluSx1_dup31_1:925366-925677	-	312	1	911555	917497	-	8	ENSG00000187642	7870	0.345257	1	532833	4114512	no_hmar
6	1	944205	944490	AluJb_dup64_1:944205-944490	-	286	1	948954	949855	+	219	ENSG00000187608	-4465	0.981834	1	532833	4114512	no_hmar
7	1	983869	984169	AluSp_dup25_1:983869-984169	+	301	1	955553	990358	+	1412	ENSG00000188157	0	0.730769	1	532833	4114512	no_hmar
8	1	1292907	1293196	AluSq2_dup49_1:1292907-1293196	+	290	1	1288684	1296643	-	30	ENSG00000162576	0	0.954545	1	532833	4114512	no_hmar
9	1	1320818	1320882	AluYb8_1:1320818-1320882	-	65	1	1322614	1334686	-	955	ENSG00000221978	-1733	1	1	532833	4114512	no_hmar
10	1	1331952	1332126	AluSx_dup86_1:1331952-1332126	-	175	1	1322614	1334686	-	955	ENSG00000221978	0	0.962963	1	532833	4114512	no_hmar
11	1	1341455	1341746	AluSz_dup44_1:1341455-1341746	+	292	1	1337466	1342597	-	360	ENSG00000242485	0	0.830797	1	532833	4114512	no_hmar
12	1	1343098	1343333	AluSx3_dup15_1:1343098-1343333	-	236	1	1337466	1342597	-	360	ENSG00000242485	502	0.0844837	1	532833	4114512	no_hmar
13	1	1344547	1344828	AluSx1_dup60_1:1344547-1344828	+	282	1	1337466	1342597	-	360	ENSG00000242485	-1951	0.963964	1	532833	4114512	no_hmar
14	1	1423642	1423858	AluJb_dup98_1:1423642-1423858	-	217	1	1407265	1431194	+	354	ENSG00000160072	0	0.865	1	532833	4114512	no_hmar
15	1	1439362	1439665	AluSx_dup110_1:1439362-1439665	-	304	1	1447649	1469449	+	821	ENSG00000197785	-7985	0.39881	1	532833	4114512	no_hmar
16	1	1450474	1450756	AluSx1_dup69_1:1450474-1450756	-	283	1	1447649	1469449	+	821	ENSG00000197785	0	0.777778	1	532833	4114512	no_hmar
17	1	1457416	1457720	AluSp_dup45_1:1457416-1457720	-	305	1	1447649	1469449	+	821	ENSG00000197785	0	1	1	532833	4114512	no_hmar
18	1	1476707	1476797	FRAM_dup6_1:1476707-1476797	-	91	1	1477449	1509937	-	871	ENSG00000160075	-653	0.651275	1	532833	4114512	no_hmar
19	1	1507175	1507474	AluY_dup107_1:1507175-1507474	-	300	1	1477449	1509937	-	871	ENSG00000160075	0	0.966441	1	532833	4114512	no_hmar
20	1	1517406	1517700	AluSc8_dup17_1:1517406-1517700	+	295	1	1510357	1510656	+	3	ENSG00000215014	-6751	0.831322	1	532833	4114512	no_hmar
21	1	1521853	1522157	AluY_dup114_1:1521853-1522157	-	305	1	1510357	1510656	+	3	ENSG00000215014	11198	0.519984	1	532833	4114512	no_hmar
22	1	1522778	1523069	AluY_dup115_1:1522778-1523069	-	292	1	1534718	1535395	-	9	ENSG00000228594	-11650	0	1	532833	4114512	no_hmar
23	1	1592071	1592374	AluY_dup127_1:1592071-1592374	-	304	1	1571129	1588935	-	374	ENSG00000248333	3137	0.957743	1	532833	4114512	no_hmar
24	1	1608907	1609189	AluY_dup131_1:1608907-1609189	-	283	1	1597224	1608138	-	130	ENSG00000189339	770	0.96345	1	532833	4114512	no_hmar
25	1	1625443	1625755	AluSx_dup154_1:1625443-1625755	+	313	1	1634349	1654257	-	340	ENSG00000008128	8595	0.447794	1	532833	4114512	no_hmar
26	1	1811758	1812034	AluYc3_dup1_1:1811758-1812034	+	277	1	1846720	1848629	+	3	ENSG00000169885	34687	0.980769	1	532833	4114512	no_hmar
27	1	1819072	1819351	AluSz6_dup25_1:1819072-1819351	-	280	1	1846720	1848629	+	3	ENSG00000169885	-27370	0.982758	1	532833	4114512	no_hmar
28	1	1928078	1928389	AluSx1_dup114_1:1928078-1928389	+	312	1	1853729	1922395	-	36	ENSG00000142609	-5684	0.98226	1	532833	4114512	no_hmar
29	1	2211526	2211827	AluSg4_dup12_1:2211526-2211827	+	302	1	2160206	2238201	+	696	ENSG00000157933	0	0.975073	1	532833	4114512	no_hmar
30	1	3260186	3260504	AluY_dup244_1:3260186-3260504	-	319	1	2985824	3350372	+	197	ENSG00000142611	0	0.895731	1	532833	4114512	no_hmar
31	1	3283550	3283851	AluSq2_dup89_1:3283550-3283851	+	302	1	2985824	3350372	+	197	ENSG00000142611	0	0.943569	1	532833	4114512	no_hmar
32	1	3554124	3554421	AluJb_dup203_1:3554124-3554421	+	298	1	3547542	3566563	-	374	ENSG00000116213	0	0.969697	1	532833	4114512	no_hmar
33	1	3714089	3714398	AluSx_dup263_1:3714089-3714398	-	310	1	3697655	3713040	-	413	ENSG00000130764	1050	0.956062	1	532833	4114512	no_hmar
34	1	4924143	4924451	AluYk4_dup1_1:4924143-4924451	-	309	1	4715486	4834556	+	0	ENSG00000196581	89588	0.357793	1	4155254	5872263	hmar
35	1	6276621	6276926	AluSc8_dup53_1:6276621-6276926	-	306	1	6266596	6279464	+	305	ENSG00000158286	0	0.972222	1	5972522	14501691	no_hmar
36	1	6472478	6472780	AluY_dup350_1:6472478-6472780	-	303	1	6473256	6479880	-	16	ENSG00000069812	-477	0.477273	1	5972522	14501691	no_hmar
37	1	6607639	6607926	AluJb_dup349_1:6607639-6607926	+	288	1	6585917	6614562	-	669	ENSG00000162408	0	1	1	5972522	14501691	no_hmar
38	1	6621490	6621789	AluY_dup366_1:6621490-6621789	+	300	1	6615434	6639641	+	5	ENSG00000173662	0	0.466667	1	5972522	14501691	no_hmar
39	1	7964683	7964985	AluSx_dup508_1:7964683-7964985	+	303	1	7980898	8000054	-	2	ENSG00000049249	15914	1	1	5972522	14501691	no_hmar
40	1	7973820	7974073	AluY_dup447_1:7973820-7974073	-	254	1	7980898	8000054	-	2	ENSG00000049249	-6826	0.969298	1	5972522	14501691	no_hmar
41	1	8023433	8023734	AluSx1_dup331_1:8023433-8023734	-	302	1	8022846	8045112	+	1165	ENSG00000116288	0	0.986487	1	5972522	14501691	no_hmar
42	1	8096619	8096932	AluJb_dup461_1:8096619-8096932	+	314	1	8064585	8075679	-	5934	ENSG00000116285	-20941	0.567901	1	5972522	14501691	no_hmar
43	1	8199348	8199674	AluSz6_dup107_1:8199348-8199674	+	327	1	8064585	8075679	-	5934	ENSG00000116285	-123670	0.97094	1	5972522	14501691	no_hmar
44	1	8429861	8430149	AluY_dup479_1:8429861-8430149	-	289	1	8415150	8716356	-	867	ENSG00000142599	0	0.931801	1	5972522	14501691	no_hmar
45	1	8575435	8575697	AluSx1_dup379_1:8575435-8575697	+	263	1	8415150	8716356	-	867	ENSG00000142599	0	0.888889	1	5972522	14501691	no_hmar
46	1	8954780	8955078	AluSz_dup304_1:8954780-8955078	-	299	1	8921422	8934967	-	11456	ENSG00000074800	19814	0.973897	1	5972522	14501691	no_hmar
47	1	9116241	9116542	AluSq2_dup232_1:9116241-9116542	-	302	1	9097648	9129595	-	2	ENSG00000142583	0	0.752778	1	5972522	14501691	no_hmar
48	1	9326884	9327178	AluSx1_dup458_1:9326884-9327178	-	295	1	9304994	9324925	+	198	ENSG00000049239	1960	0.338638	1	5972522	14501691	no_hmar
49	1	9437812	9438111	AluSz6_dup141_1:9437812-9438111	-	300	1	9415951	9427631	+	49	ENSG00000171621	10182	0.924055	1	5972522	14501691	no_hmar
50	1	9488104	9488399	AluSz_dup369_1:9488104-9488399	-	296	1	9415951	9427631	+	49	ENSG00000171621	60474	0.968992	1	5972522	14501691	no_hmar
51	1	9491098	9491359	AluSx1_dup472_1:9491098-9491359	+	262	1	9415951	9427631	+	49	ENSG00000171621	-63468	0.888889	1	5972522	14501691	no_hmar
52	1	9598796	9599080	AluSx_dup774_1:9598796-9599080	-	285	1	9599751	9642556	+	176	ENSG00000171612	-672	0.987179	1	5972522	14501691	no_hmar
53	1	9602863	9603176	AluSz6_dup153_1:9602863-9603176	-	314	1	9599751	9642556	+	176	ENSG00000171612	0	1	1	5972522	14501691	no_hmar
54	1	9621006	9621300	AluSc8_dup105_1:9621006-9621300	-	295	1	9599751	9642556	+	176	ENSG00000171612	0	0.973118	1	5972522	14501691	no_hmar
55	1	9829819	9830102	AluYc_dup30_1:9829819-9830102	+	284	1	9790569	9883791	-	3540	ENSG00000171603	0	0.992647	1	5972522	14501691	no_hmar
56	1	9917257	9917565	AluY_dup599_1:9917257-9917565	+	309	1	9910779	9932122	-	53	ENSG00000178585	0	0.918574	1	5972522	14501691	no_hmar
57	1	10212037	10212317	AluSx3_dup132_1:10212037-10212317	+	281	1	10093729	10240011	+	1580	ENSG00000130939	0	0.946353	1	5972522	14501691	no_hmar
58	1	10212574	10212873	AluSx1_dup579_1:10212574-10212873	+	300	1	10093729	10240011	+	1580	ENSG00000130939	0	0.175946	1	5972522	14501691	no_hmar
59	1	10214327	10214430	AluSx_dup940_1:10214327-10214430	+	104	1	10093729	10240011	+	1580	ENSG00000130939	0	0.988064	1	5972522	14501691	no_hmar
60	1	10462586	10462879	AluY_dup675_1:10462586-10462879	-	294	1	10459175	10479803	+	1977	ENSG00000142657	0	0.983165	1	5972522	14501691	no_hmar
61	1	10515549	10515850	AluY_dup681_1:10515549-10515850	-	302	1	10490575	10511649	+	21	ENSG00000175279	3901	0.975	1	5972522	14501691	no_hmar
62	1	10525621	10525746	AluY_dup686_1:10525621-10525746	-	126	1	10521550	10532515	-	614	ENSG00000160049	0	1	1	5972522	14501691	no_hmar
63	1	10530472	10530781	AluY_dup687_1:10530472-10530781	-	310	1	10521550	10532515	-	614	ENSG00000160049	0	0.555556	1	5972522	14501691	no_hmar
64	1	10604812	10605119	AluJb_dup882_1:10604812-10605119	-	308	1	10535024	10690041	+	324	ENSG00000142655	0	0.983575	1	5972522	14501691	no_hmar
65	1	10660195	10660489	AluSq_dup146_1:10660195-10660489	+	295	1	10535024	10690041	+	324	ENSG00000142655	0	0.5	1	5972522	14501691	no_hmar
66	1	10992699	10992989	AluY_dup711_1:10992699-10992989	-	291	1	11007723	11042094	-	0	ENSG00000175262	-14735	0.630953	1	5972522	14501691	no_hmar
67	1	11074714	11075019	AluSq2_dup332_1:11074714-11075019	+	306	1	11073785	11083302	+	1072	ENSG00000120948	0	0.444444	1	5972522	14501691	no_hmar
68	1	11127207	11127509	AluY_dup723_1:11127207-11127509	+	303	1	11126778	11159888	-	2116	ENSG00000171824	0	0.694445	1	5972522	14501691	no_hmar
69	1	11208677	11208966	AluSg7_dup54_1:11208677-11208966	+	290	1	11167545	11319466	-	2416	ENSG00000198793	0	0.972789	1	5972522	14501691	no_hmar
70	1	11260791	11261087	AluY_dup732_1:11260791-11261087	+	297	1	11167545	11319466	-	2416	ENSG00000198793	0	0.51281	1	5972522	14501691	no_hmar
71	1	11791017	11791318	AluSg_dup251_1:11791017-11791318	+	302	1	11796266	11810340	+	101	ENSG00000177674	4949	0.964487	1	5972522	14501691	no_hmar
72	1	11925313	11925592	AluSz6_dup235_1:11925313-11925592	-	280	1	11917715	11918890	-	0	ENSG00000120937	6424	0.368132	1	5972522	14501691	no_hmar
73	1	11986840	11987149	AluSg_dup258_1:11986840-11987149	+	310	1	11980375	11986294	-	395	ENSG00000116685	-547	0.416667	1	5972522	14501691	no_hmar
74	1	11993646	11993940	AluSp_dup308_1:11993646-11993940	+	295	1	11994837	12034862	+	1442	ENSG00000083444	898	0.333333	1	5972522	14501691	no_hmar
75	1	12085105	12085415	AluSz6_dup244_1:12085105-12085415	-	311	1	12081784	12091869	+	172	ENSG00000116691	0	0.333333	1	5972522	14501691	no_hmar
76	1	12590945	12591250	AluSz_dup688_1:12590945-12591250	-	306	1	12294324	12569075	+	2191	ENSG00000048707	21871	0.949495	1	5972522	14501691	no_hmar
77	1	12684945	12685240	AluSx1_dup775_1:12684945-12685240	-	296	1	12628372	12677353	-	453	ENSG00000162496	7593	0.910784	1	5972522	14501691	no_hmar
78	1	12702553	12702883	AluY_dup813_1:12702553-12702883	+	331	1	12704566	12726743	+	0	ENSG00000204518	1684	0.972222	1	5972522	14501691	no_hmar
79	1	13826421	13826748	AluSx_dup1387_1:13826421-13826748	+	328	1	13802317	13840088	-	0	ENSG00000162494	0	0.81579	1	5972522	14501691	no_hmar
80	1	13901056	13901397	AluY_dup879_1:13901056-13901397	-	342	1	13910301	13942403	+	0	ENSG00000162493	-8905	0.761905	1	5972522	14501691	no_hmar
81	1	13913281	13913565	AluSx4_dup36_1:13913281-13913565	+	285	1	13910301	13942403	+	0	ENSG00000162493	0	0.444445	1	5972522	14501691	no_hmar
82	1	13975519	13975815	AluY_dup888_1:13975519-13975815	-	297	1	13910301	13942403	+	0	ENSG00000162493	33117	0.464286	1	5972522	14501691	no_hmar
83	1	14025488	14025783	AluY_dup896_1:14025488-14025783	-	296	1	14042101	14149676	+	481	ENSG00000116731	-16319	0.555555	1	5972522	14501691	no_hmar
84	1	14094570	14094877	AluY_dup902_1:14094570-14094877	-	308	1	14042101	14149676	+	481	ENSG00000116731	0	1	1	5972522	14501691	no_hmar
85	1	15302246	15302557	AluY_dup967_1:15302246-15302557	+	312	1	14925494	15441128	+	126	ENSG00000189337	0	0.530322	1	15222643	33976835	no_hmar
86	1	15353567	15353875	AluY_dup971_1:15353567-15353875	-	309	1	14925494	15441128	+	126	ENSG00000189337	0	0.830986	1	15222643	33976835	no_hmar
87	1	15359163	15359468	AluSx1_dup937_1:15359163-15359468	+	306	1	14925494	15441128	+	126	ENSG00000189337	0	1	1	15222643	33976835	no_hmar
88	1	15373985	15374279	AluSz_dup819_1:15373985-15374279	+	295	1	14925494	15441128	+	126	ENSG00000189337	0	0.333333	1	15222643	33976835	no_hmar
89	1	15412478	15412765	AluSx1_dup943_1:15412478-15412765	-	288	1	14925494	15441128	+	126	ENSG00000189337	0	0.583333	1	15222643	33976835	no_hmar
90	1	15440164	15440366	AluSx1_dup945_1:15440164-15440366	-	203	1	14925494	15441128	+	126	ENSG00000189337	0	0.735043	1	15222643	33976835	no_hmar
91	1	15529749	15530056	AluSg_dup350_1:15529749-15530056	-	308	1	15541584	15546236	+	81	ENSG00000171729	-11529	0.5	1	15222643	33976835	no_hmar
92	1	15688222	15688516	AluSc_dup263_1:15688222-15688516	+	295	1	15573776	15723906	+	167	ENSG00000142621	0	0.967928	1	15222643	33976835	no_hmar
93	1	15886277	15886578	AluSp_dup429_1:15886277-15886578	+	302	1	15855601	15901270	+	312	ENSG00000116138	0	0.968254	1	15222643	33976835	no_hmar
94	1	15925477	15925768	AluSx4_dup47_1:15925477-15925768	+	292	1	15900149	15911462	-	4	ENSG00000116771	-14016	0.897355	1	15222643	33976835	no_hmar
95	1	15974179	15974467	AluSx3_dup241_1:15974179-15974467	+	289	1	15944166	15983125	+	243	ENSG00000197312	0	0.976562	1	15222643	33976835	no_hmar
96	1	15978891	15979036	AluSx_dup1519_1:15978891-15979036	+	146	1	15944166	15983125	+	243	ENSG00000197312	0	1	1	15222643	33976835	no_hmar
97	1	16050698	16050999	AluSc5_dup53_1:16050698-16050999	+	302	1	16011054	16060426	+	878	ENSG00000116786	0	0.475	1	15222643	33976835	no_hmar
98	1	16077044	16077353	AluSx_dup1533_1:16077044-16077353	+	310	1	16069055	16074124	+	0	ENSG00000162460	-2921	0.972973	1	15222643	33976835	no_hmar
99	1	16152680	16152973	AluSg_dup377_1:16152680-16152973	-	294	1	16174563	16265919	+	4888	ENSG00000065526	-21591	0.951613	1	15222643	33976835	no_hmar
100	1	16330028	16330337	AluY_dup1052_1:16330028-16330337	-	310	1	16330799	16332838	+	0	ENSG00000183888	-463	1	1	15222643	33976835	no_hmar
101	1	16509352	16509646	AluSx1_dup1032_1:16509352-16509646	+	295	1	16525085	16535549	-	489	ENSG00000142632	15440	0.583333	1	15222643	33976835	no_hmar
102	1	16732607	16732778	AluSx_dup1672_1:16732607-16732778	-	172	1	16713793	16757866	-	7	ENSG00000187144	0	0.981482	1	15222643	33976835	no_hmar
103	1	16791833	16792111	AluSc_dup288_1:16791833-16792111	+	279	1	16767257	16785488	+	249	ENSG00000157191	-6346	0.974359	1	15222643	33976835	no_hmar
104	1	16955853	16956149	AluY_dup1094_1:16955853-16956149	-	297	1	16999498	17000004	+	0	ENSG00000237847	-43350	0.333333	1	15222643	33976835	no_hmar
105	1	17266886	17267182	AluSg7_dup88_1:17266886-17267182	-	297	1	17248514	17298938	+	254	ENSG00000058453	0	0.984303	1	15222643	33976835	no_hmar
106	1	17291178	17291475	AluSx_dup1733_1:17291178-17291475	-	298	1	17248514	17298938	+	254	ENSG00000058453	0	0.666667	1	15222643	33976835	no_hmar
107	1	17319717	17320002	AluJb_dup1534_1:17319717-17320002	-	286	1	17312483	17338233	-	572	ENSG00000159363	0	0.986667	1	15222643	33976835	no_hmar
108	1	17358694	17358981	AluSx1_dup1090_1:17358694-17358981	-	288	1	17345379	17380514	-	774	ENSG00000117118	0	0.987903	1	15222643	33976835	no_hmar
109	1	17463315	17463618	AluSz_dup1007_1:17463315-17463618	-	304	1	17395542	17445866	-	9	ENSG00000117115	17450	0.416667	1	15222643	33976835	no_hmar
110	1	17796042	17796341	AluSx1_dup1121_1:17796042-17796341	+	300	1	17735589	17765010	-	2176	ENSG00000179051	-31033	0.555556	1	15222643	33976835	no_hmar
111	1	18043301	18043605	AluSz6_dup412_1:18043301-18043605	-	305	1	17907091	18023872	+	254	ENSG00000074964	19430	0.94359	1	15222643	33976835	no_hmar
112	1	18296986	18297286	AluY_dup1158_1:18296986-18297286	-	301	1	18434623	18704817	+	0	ENSG00000117154	-137338	0.666667	1	15222643	33976835	no_hmar
113	1	18823080	18823380	AluSx_dup1869_1:18823080-18823380	+	301	1	18807476	18809806	+	0	ENSG00000179023	-13275	0.433333	1	15222643	33976835	no_hmar
114	1	18860612	18860915	AluY_dup1169_1:18860612-18860915	+	304	1	18807476	18809806	+	0	ENSG00000179023	-50807	0.388889	1	15222643	33976835	no_hmar
115	1	19010052	19010351	AluSx1_dup1170_1:19010052-19010351	+	300	1	18958098	19071420	+	0	ENSG00000009709	0	0.216667	1	15222643	33976835	no_hmar
116	1	19370211	19370542	AluJr4_dup136_1:19370211-19370542	+	332	1	19401329	19536742	-	8670	ENSG00000127481	30788	0.666667	1	15222643	33976835	no_hmar
117	1	19591218	19591523	AluY_dup1190_1:19591218-19591523	-	306	1	19593797	19600568	-	12	ENSG00000211454	-2275	0.707143	1	15222643	33976835	no_hmar
118	1	19827311	19827602	AluY_dup1206_1:19827311-19827602	+	292	1	19666027	19811932	-	1140	ENSG00000077549	-15380	0.733333	1	15222643	33976835	no_hmar
119	1	19887179	19887477	AluSx1_dup1210_1:19887179-19887477	+	299	1	19923540	19952892	+	196	ENSG00000173436	36064	1	1	15222643	33976835	no_hmar
120	1	19950766	19951081	AluSx_dup1947_1:19950766-19951081	-	316	1	19923540	19952892	+	196	ENSG00000173436	0	0.993464	1	15222643	33976835	no_hmar
121	1	19979499	19979799	AluY_dup1214_1:19979499-19979799	+	301	1	19969806	19983619	+	158	ENSG00000158747	0	0.67972	1	15222643	33976835	no_hmar
122	1	20922128	20922355	AluJb_dup1868_1:20922128-20922355	+	228	1	20915623	20945058	+	97	ENSG00000158825	0	0.753456	1	15222643	33976835	no_hmar
123	1	21091208	21091379	AluSq2_dup637_1:21091208-21091379	+	172	1	21071293	21106933	-	2512	ENSG00000127483	0	0.993243	1	15222643	33976835	no_hmar
124	1	21577219	21577514	AluY_dup1301_1:21577219-21577514	+	296	1	21546451	21671871	-	980	ENSG00000117298	0	0.985328	1	15222643	33976835	no_hmar
125	1	21878213	21878517	AluYf4_dup15_1:21878213-21878517	-	305	1	21880575	21904138	+	3	ENSG00000162551	-2059	0.972222	1	15222643	33976835	no_hmar
126	1	21986841	21987126	AluSx1_dup1348_1:21986841-21987126	-	286	1	21924216	21978315	-	295	ENSG00000076864	8527	0.0666667	1	15222643	33976835	no_hmar
127	1	22105246	22105572	AluY_dup1337_1:22105246-22105572	-	327	1	22005913	22109450	-	1315	ENSG00000090686	0	0.431791	1	15222643	33976835	no_hmar
128	1	22110588	22110885	AluSp_dup646_1:22110588-22110885	+	298	1	22005913	22109450	-	1315	ENSG00000090686	-1139	0.666667	1	15222643	33976835	no_hmar
129	1	22176179	22176470	AluSg_dup523_1:22176179-22176470	-	292	1	22149812	22263710	-	1264	ENSG00000142798	0	0.949039	1	15222643	33976835	no_hmar
130	1	22271484	22271794	AluJb_dup2081_1:22271484-22271794	-	311	1	22149812	22263710	-	1264	ENSG00000142798	7775	0.363992	1	15222643	33976835	no_hmar
131	1	22397526	22397836	AluY_dup1370_1:22397526-22397836	-	311	1	22404972	22418007	+	992	ENSG00000070831	-7137	0.444444	1	15222643	33976835	no_hmar
132	1	23107532	23107838	AluY_dup1393_1:23107532-23107838	+	307	1	23037476	23240360	+	457	ENSG00000133216	0	0.733333	1	15222643	33976835	no_hmar
133	1	23343734	23344021	AluY_dup1402_1:23343734-23344021	-	288	1	23337397	23342266	-	2	ENSG00000227868	1469	0.333333	1	15222643	33976835	no_hmar
134	1	23495576	23495852	AluJb_dup2212_1:23495576-23495852	+	277	1	23519582	23520712	-	31	ENSG00000179546	23731	0.273591	1	15222643	33976835	no_hmar
135	1	23572378	23572684	AluSz_dup1375_1:23572378-23572684	+	307	1	23519582	23520712	-	31	ENSG00000179546	-51667	1	1	15222643	33976835	no_hmar
136	1	23598422	23598730	AluSc8_dup282_1:23598422-23598730	-	309	1	23636950	23667501	-	3021	ENSG00000125944	-38221	0.666667	1	15222643	33976835	no_hmar
137	1	23709491	23709800	AluY_dup1436_1:23709491-23709800	+	310	1	23707962	23751126	-	106	ENSG00000204219	0	0.635022	1	15222643	33976835	no_hmar
138	1	23868164	23868467	AluY_dup1449_1:23868164-23868467	-	304	1	23836375	23857285	-	193	ENSG00000007968	10880	0.555556	1	15222643	33976835	no_hmar
139	1	24016813	24017123	AluY_dup1475_1:24016813-24017123	-	311	1	24018314	24022860	+	1893	ENSG00000142676	-1192	0.775	1	15222643	33976835	no_hmar
140	1	24489439	24489735	AluSx1_dup1546_1:24489439-24489735	-	297	1	24483623	24513738	-	84	ENSG00000185436	0	0.976608	1	15222643	33976835	no_hmar
141	1	24662075	24662371	AluY_dup1526_1:24662075-24662371	-	297	1	24646042	24690858	+	21	ENSG00000158055	0	0.974786	1	15222643	33976835	no_hmar
142	1	24955731	24956038	AluSz6_dup622_1:24955731-24956038	+	308	1	24969818	24998774	+	3418	ENSG00000133226	13781	0.85	1	15222643	33976835	no_hmar
143	1	24959907	24960213	AluSx1_dup1577_1:24959907-24960213	-	307	1	24969818	24998774	+	3418	ENSG00000133226	-9606	0.50912	1	15222643	33976835	no_hmar
144	1	25069377	25069669	AluSx_dup2467_1:25069377-25069669	-	293	1	25072045	25167425	+	575	ENSG00000169504	-2377	0.916667	1	15222643	33976835	no_hmar
145	1	25236495	25236800	AluSx1_dup1603_1:25236495-25236800	+	306	1	25228616	25291062	-	126	ENSG00000020633	0	1	1	15222643	33976835	no_hmar
146	1	26501064	26501360	AluSq_dup364_1:26501064-26501360	-	297	1	26504039	26516036	+	265	ENSG00000142675	-2680	0.986667	1	15222643	33976835	no_hmar
147	1	26552549	26552867	AluY_dup1628_1:26552549-26552867	+	319	1	26566275	26603781	+	946	ENSG00000130695	13409	0.82906	1	15222643	33976835	no_hmar
148	1	26717083	26717378	AluY_dup1639_1:26717083-26717378	+	296	1	26688145	26700781	-	0	ENSG00000176083	-16303	0.958759	1	15222643	33976835	no_hmar
149	1	26724839	26725152	AluY_dup1643_1:26724839-26725152	-	314	1	26737383	26752946	+	1	ENSG00000131914	-12232	0.916667	1	15222643	33976835	no_hmar
150	1	27131429	27131725	AluY_dup1692_1:27131429-27131725	-	297	1	27117307	27124332	+	73	ENSG00000060642	7098	0.967742	1	15222643	33976835	no_hmar
151	1	27394365	27394668	AluY_dup1722_1:27394365-27394668	-	304	1	27426801	27480825	-	289	ENSG00000090020	-32134	0.840909	1	15222643	33976835	no_hmar
152	1	27423351	27423617	AluSz_dup1681_1:27423351-27423617	-	267	1	27426801	27480825	-	289	ENSG00000090020	-3185	0.686274	1	15222643	33976835	no_hmar
153	1	27517700	27518002	AluY_dup1731_1:27517700-27518002	-	303	1	27426801	27480825	-	289	ENSG00000090020	36876	0.955357	1	15222643	33976835	no_hmar
154	1	27559124	27559436	AluY_dup1737_1:27559124-27559436	-	313	1	27587546	27632871	+	325	ENSG00000142784	-28111	0.95977	1	15222643	33976835	no_hmar
155	1	27787972	27788284	AluY_dup1762_1:27787972-27788284	-	313	1	27734686	27755400	-	1281	ENSG00000158195	32573	0.945946	1	15222643	33976835	no_hmar
156	1	27856766	27856935	AluSx3_dup472_1:27856766-27856935	-	170	1	27873818	27878626	-	529	ENSG00000126705	-16884	0.625	1	15222643	33976835	no_hmar
157	1	27857642	27857931	AluY_dup1773_1:27857642-27857931	-	290	1	27873818	27878626	-	529	ENSG00000126705	-15888	0.949219	1	15222643	33976835	no_hmar
158	1	27960077	27960290	AluJr_dup1133_1:27960077-27960290	-	214	1	27939428	27950427	-	0	ENSG00000000938	9651	1	1	15222643	33976835	no_hmar
159	1	28056685	28056996	AluSp_dup878_1:28056685-28056996	-	312	1	28052592	28087089	+	147	ENSG00000009780	0	0.333333	1	15222643	33976835	no_hmar
160	1	28131042	28131345	AluSx3_dup482_1:28131042-28131345	+	304	1	28099819	28148837	+	191	ENSG00000117758	0	0.991453	1	15222643	33976835	no_hmar
161	1	28137553	28137834	AluSx1_dup1875_1:28137553-28137834	+	282	1	28099819	28148837	+	191	ENSG00000117758	0	0.5625	1	15222643	33976835	no_hmar
162	1	28255546	28255854	AluY_dup1806_1:28255546-28255854	+	309	1	28261695	28285346	+	117	ENSG00000130768	5842	0.978956	1	15222643	33976835	no_hmar
163	1	28513154	28513432	AluSx_dup2963_1:28513154-28513432	+	279	1	28527013	28527152	-	29	ENSG00000215902	13582	0.973214	1	15222643	33976835	no_hmar
164	1	28522716	28522933	AluJb_dup2933_1:28522716-28522933	+	218	1	28527013	28527152	-	29	ENSG00000215902	4081	0.989637	1	15222643	33976835	no_hmar
165	1	28524824	28525120	AluY_dup1827_1:28524824-28525120	-	297	1	28527013	28527152	-	29	ENSG00000215902	-1894	0.594697	1	15222643	33976835	no_hmar
166	1	28560137	28560399	AluSc5_dup98_1:28560137-28560399	-	263	1	28527762	28559509	-	952	ENSG00000126698	629	0.958333	1	15222643	33976835	no_hmar
167	1	28561845	28562150	AluSx_dup2965_1:28561845-28562150	-	306	1	28562695	28573145	+	772	ENSG00000130770	-546	0.0295082	1	15222643	33976835	no_hmar
168	1	28620308	28620605	AluSx1_dup1926_1:28620308-28620605	-	298	1	28586359	28607310	+	453	ENSG00000130766	12999	0.636363	1	15222643	33976835	no_hmar
169	1	28626965	28627269	AluSx_dup2978_1:28626965-28627269	+	305	1	28586359	28607310	+	453	ENSG00000130766	-19656	0.915048	1	15222643	33976835	no_hmar
170	1	28641470	28641738	AluYc_dup130_1:28641470-28641738	-	269	1	28657174	28661478	+	83	ENSG00000130772	-15437	0.533333	1	15222643	33976835	no_hmar
171	1	28663059	28663310	AluY_dup1843_1:28663059-28663310	-	252	1	28657174	28661478	+	83	ENSG00000130772	1582	0.982795	1	15222643	33976835	no_hmar
172	1	28694342	28694642	AluY_dup1854_1:28694342-28694642	-	301	1	28657174	28661478	+	83	ENSG00000130772	32865	0.967391	1	15222643	33976835	no_hmar
173	1	28799506	28799809	AluSz_dup1819_1:28799506-28799809	+	304	1	28733959	28823058	+	1059	ENSG00000204138	0	0.98	1	15222643	33976835	no_hmar
174	1	28838489	28838747	AluSx1_dup1961_1:28838489-28838747	-	259	1	28843351	28864516	+	1283	ENSG00000180198	-4605	0.731482	1	15222643	33976835	no_hmar
175	1	28846387	28846514	AluSx_dup3042_1:28846387-28846514	-	128	1	28843351	28864516	+	1283	ENSG00000180198	0	0.98374	1	15222643	33976835	no_hmar
176	1	28860001	28860307	AluSp_dup955_1:28860001-28860307	+	307	1	28843351	28864516	+	1283	ENSG00000180198	0	1	1	15222643	33976835	no_hmar
177	1	28860691	28860991	AluY_dup1878_1:28860691-28860991	-	301	1	28843351	28864516	+	1283	ENSG00000180198	0	0.974206	1	15222643	33976835	no_hmar
178	1	28976387	28976685	AluSx1_dup1977_1:28976387-28976685	+	299	1	28995296	29041282	+	382	ENSG00000162419	18612	0.958709	1	15222643	33976835	no_hmar
179	1	28992051	28992294	AluSq2_dup1005_1:28992051-28992294	+	244	1	28995296	29041282	+	382	ENSG00000162419	3003	0.933333	1	15222643	33976835	no_hmar
180	1	28993278	28993584	AluJb_dup3047_1:28993278-28993584	+	307	1	28995296	29041282	+	382	ENSG00000162419	1713	1	1	15222643	33976835	no_hmar
181	1	28994286	28994600	AluSc_dup492_1:28994286-28994600	+	315	1	28995296	29041282	+	382	ENSG00000162419	697	0.903523	1	15222643	33976835	no_hmar
182	1	28997948	28998256	AluJb_dup3048_1:28997948-28998256	+	309	1	28995296	29041282	+	382	ENSG00000162419	0	0.983593	1	15222643	33976835	no_hmar
183	1	29006315	29006619	AluSp_dup976_1:29006315-29006619	-	305	1	28995296	29041282	+	382	ENSG00000162419	0	0.990941	1	15222643	33976835	no_hmar
184	1	29075685	29075983	AluY_dup1941_1:29075685-29075983	-	299	1	29063633	29095461	+	1379	ENSG00000198492	0	0.972649	1	15222643	33976835	no_hmar
185	1	29103597	29103907	AluY_dup1946_1:29103597-29103907	+	311	1	29063633	29095461	+	1379	ENSG00000198492	-8137	0.779762	1	15222643	33976835	no_hmar
186	1	29178102	29178397	AluSp_dup996_1:29178102-29178397	+	296	1	29138896	29189792	+	0	ENSG00000116329	0	0.966667	1	15222643	33976835	no_hmar
187	1	29203145	29203439	AluJb_dup3099_1:29203145-29203439	-	295	1	29138896	29189792	+	0	ENSG00000116329	13354	0.4	1	15222643	33976835	no_hmar
188	1	29302199	29302481	AluY_dup1968_1:29302199-29302481	+	283	1	29313950	29442306	+	1100	ENSG00000159023	11470	0.979167	1	15222643	33976835	no_hmar
189	1	29307307	29307584	AluSx1_dup2018_1:29307307-29307584	-	278	1	29313950	29442306	+	1100	ENSG00000159023	-6367	0.246032	1	15222643	33976835	no_hmar
190	1	29383045	29383336	AluSx1_dup2028_1:29383045-29383336	-	292	1	29313950	29442306	+	1100	ENSG00000159023	0	0.958333	1	15222643	33976835	no_hmar
191	1	29437887	29438190	AluY_dup1983_1:29437887-29438190	+	304	1	29313950	29442306	+	1100	ENSG00000159023	0	0.95913	1	15222643	33976835	no_hmar
192	1	29465346	29465641	AluSp_dup1015_1:29465346-29465641	-	296	1	29474925	29508264	-	819	ENSG00000116350	-9285	0.988506	1	15222643	33976835	no_hmar
193	1	29531685	29531995	AluSz_dup1902_1:29531685-29531995	-	311	1	29520537	29557418	-	226	ENSG00000116353	0	0.979308	1	15222643	33976835	no_hmar
194	1	29532061	29532341	AluSg_dup792_1:29532061-29532341	+	281	1	29520537	29557418	-	226	ENSG00000116353	0	0.916667	1	15222643	33976835	no_hmar
195	1	31144359	31144650	AluY_dup2020_1:31144359-31144650	+	292	1	31186432	31196398	-	8	ENSG00000162510	41783	0.929487	1	15222643	33976835	no_hmar
196	1	31410607	31410918	AluSx1_dup2079_1:31410607-31410918	-	312	1	31406061	31538632	-	1848	ENSG00000134644	0	0.976952	1	15222643	33976835	no_hmar
197	1	31502781	31503078	AluSx1_dup2084_1:31502781-31503078	+	298	1	31406061	31538632	-	1848	ENSG00000134644	0	0.967867	1	15222643	33976835	no_hmar
198	1	31503305	31503568	AluJb_dup3210_1:31503305-31503568	+	264	1	31406061	31538632	-	1848	ENSG00000134644	0	0.970268	1	15222643	33976835	no_hmar
199	1	31525548	31525850	AluSz6_dup825_1:31525548-31525850	-	303	1	31406061	31538632	-	1848	ENSG00000134644	0	0.988235	1	15222643	33976835	no_hmar
200	1	31579967	31580104	AluSx4_dup109_1:31579967-31580104	-	138	1	31406061	31538632	-	1848	ENSG00000134644	41336	0.536131	1	15222643	33976835	no_hmar
201	1	31580386	31580675	AluY_dup2048_1:31580386-31580675	-	290	1	31406061	31538632	-	1848	ENSG00000134644	41755	0.977692	1	15222643	33976835	no_hmar
202	1	31612832	31613131	AluSc8_dup426_1:31612832-31613131	+	300	1	31654553	31712394	-	5	ENSG00000084628	41423	0.388889	1	15222643	33976835	no_hmar
203	1	31613468	31613741	AluSp_dup1045_1:31613468-31613741	+	274	1	31654553	31712394	-	5	ENSG00000084628	40813	0.920635	1	15222643	33976835	no_hmar
204	1	31635984	31636259	AluJb_dup3263_1:31635984-31636259	-	276	1	31654553	31712394	-	5	ENSG00000084628	-18295	0.708245	1	15222643	33976835	no_hmar
205	1	31677990	31678147	AluSx1_dup2117_1:31677990-31678147	-	158	1	31654553	31712394	-	5	ENSG00000084628	0	1	1	15222643	33976835	no_hmar
206	1	31786705	31787011	AluSx1_dup2130_1:31786705-31787011	-	307	1	31782946	31837037	+	329	ENSG00000121766	0	0.826572	1	15222643	33976835	no_hmar
207	1	31860929	31861222	AluSz_dup1984_1:31860929-31861222	+	294	1	31838736	31845861	-	5	ENSG00000121769	-15069	0.926415	1	15222643	33976835	no_hmar
208	1	31931922	31932217	AluY_dup2078_1:31931922-31932217	-	296	1	31882685	31907043	+	13	ENSG00000168528	24880	0.111111	1	15222643	33976835	no_hmar
209	1	32000048	32000361	AluYk4_dup27_1:32000048-32000361	+	314	1	32042750	32052577	+	354	ENSG00000142910	42390	0.99	1	15222643	33976835	no_hmar
210	1	32023548	32023865	AluYb8_dup31_1:32023548-32023865	-	318	1	32042750	32052577	+	354	ENSG00000142910	-18886	0.866525	1	15222643	33976835	no_hmar
211	1	32175908	32176207	AluSz_dup2005_1:32175908-32176207	+	300	1	32118255	32167794	-	41	ENSG00000084636	-8115	0.971063	1	15222643	33976835	no_hmar
212	1	32317193	32317474	AluSc8_dup435_1:32317193-32317474	-	282	1	32256207	32280934	-	19	ENSG00000134668	36260	1	1	15222643	33976835	no_hmar
213	1	32404694	32405012	AluSg_dup845_1:32404694-32405012	+	319	1	32374456	32384666	-	1073	ENSG00000184007	-20029	0.617153	1	15222643	33976835	no_hmar
214	1	32501765	32502069	AluYk4_dup28_1:32501765-32502069	-	305	1	32479597	32508222	+	3360	ENSG00000121774	0	1	1	15222643	33976835	no_hmar
215	1	32552810	32552942	AluSx_dup3374_1:32552810-32552942	+	133	1	32538649	32568271	+	137	ENSG00000121775	0	0.933333	1	15222643	33976835	no_hmar
216	1	32580745	32581035	AluY_dup2128_1:32580745-32581035	-	291	1	32573732	32636492	+	985	ENSG00000025800	0	0.915	1	15222643	33976835	no_hmar
217	1	32718686	32718971	AluSx1_dup2203_1:32718686-32718971	+	286	1	32713023	32714199	+	0	ENSG00000183615	-4488	0.955192	1	15222643	33976835	no_hmar
218	1	32983672	32983970	AluY_dup2176_1:32983672-32983970	+	299	1	32936226	33002126	+	0	ENSG00000254553	0	0.977298	1	15222643	33976835	no_hmar
219	1	33019519	33019819	AluSx1_dup2235_1:33019519-33019819	+	301	1	32936226	33002126	+	0	ENSG00000254553	-17394	0.960971	1	15222643	33976835	no_hmar
220	1	33078017	33078286	AluSx_dup3472_1:33078017-33078286	-	270	1	33065857	33116166	-	273	ENSG00000176261	0	0.0415418	1	15222643	33976835	no_hmar
221	1	33164370	33164680	AluJo_dup1454_1:33164370-33164680	-	311	1	33147392	33168261	-	99	ENSG00000162520	0	0.444444	1	15222643	33976835	no_hmar
222	1	33310597	33310868	AluY_dup2227_1:33310597-33310868	-	272	1	33291701	33321636	+	286	ENSG00000116497	0	0.666667	1	15222643	33976835	no_hmar
223	1	33453314	33453611	AluSx3_dup596_1:33453314-33453611	+	298	1	33476433	33502429	-	604	ENSG00000004455	22823	1	1	15222643	33976835	no_hmar
224	1	33504987	33505285	AluSx1_dup2304_1:33504987-33505285	-	299	1	33476433	33502429	-	604	ENSG00000004455	2559	0.977012	1	15222643	33976835	no_hmar
225	1	33708772	33709086	AluSx1_dup2324_1:33708772-33709086	-	315	1	33736176	33764644	+	86	ENSG00000160094	-27091	0.524522	1	15222643	33976835	no_hmar
226	1	33780579	33780703	AluJb_dup3579_1:33780579-33780703	+	125	1	33790469	33841140	-	1103	ENSG00000134686	9767	0.992064	1	15222643	33976835	no_hmar
227	1	34849972	34850255	AluY_dup2293_1:34849972-34850255	+	284	1	34643391	34684359	+	0	ENSG00000142698	-165614	0.722222	1	34078374	35057156	hmar
228	1	35718853	35719147	AluYf4_dup29_1:35718853-35719147	+	295	1	35734648	35885275	+	1958	ENSG00000146463	15502	0.6	1	35063231	37190678	no_hmar
229	1	35959769	35960076	AluSx3_dup636_1:35959769-35960076	+	308	1	35900498	36023518	-	660	ENSG00000142687	0	0.97988	1	35063231	37190678	no_hmar
230	1	35987292	35987603	AluY_dup2371_1:35987292-35987603	+	312	1	35900498	36023518	-	660	ENSG00000142687	0	0.972789	1	35063231	37190678	no_hmar
231	1	36106529	36106814	AluSp_dup1196_1:36106529-36106814	+	286	1	36068871	36107033	-	658	ENSG00000126067	0	0.0131774	1	35063231	37190678	no_hmar
232	1	36158611	36158918	AluSx1_dup2426_1:36158611-36158918	+	308	1	36181236	36181922	-	67	ENSG00000142686	22319	0.911111	1	35063231	37190678	no_hmar
233	1	36460553	36460810	AluSx_dup3715_1:36460553-36460810	+	258	1	36397028	36521343	+	468	ENSG00000126070	0	0.6	1	35063231	37190678	no_hmar
234	1	36624637	36624956	AluSg4_dup173_1:36624637-36624956	-	320	1	36622019	36645856	+	1148	ENSG00000116871	0	0.242424	1	35063231	37190678	no_hmar
235	1	36704859	36705167	AluSz_dup2263_1:36704859-36705167	-	309	1	36748165	36769615	+	6163	ENSG00000054118	-42999	0.983333	1	35063231	37190678	no_hmar
236	1	37043381	37043685	AluSp_dup1236_1:37043381-37043685	-	305	1	36931700	36945097	-	0	ENSG00000119535	98285	0.7	1	35063231	37190678	no_hmar
237	1	37170299	37170595	AluSx_dup3789_1:37170299-37170595	-	297	1	37267455	37499709	-	0	ENSG00000163873	-96861	0.936842	1	35063231	37190678	no_hmar
238	1	37440890	37441193	AluSc8_dup498_1:37440890-37441193	-	304	1	37267455	37499709	-	0	ENSG00000163873	0	0.8125	1	37243799	37607640	hmar
239	1	38365392	38365684	AluY_dup2522_1:38365392-38365684	-	293	1	38327990	38411980	-	416	ENSG00000204084	0	0.958333	1	37862703	38564860	no_hmar
240	1	38413495	38413714	AluJr_dup1575_1:38413495-38413714	+	220	1	38327990	38411980	-	416	ENSG00000204084	-1516	0.911688	1	37862703	38564860	no_hmar
241	1	38794758	38795063	AluYb8_dup39_1:38794758-38795063	+	306	1	38511063	38512415	-	3	ENSG00000185668	-282344	0.844777	1	38631657	38950596	hmar
242	1	38899308	38899606	AluSq2_dup1332_1:38899308-38899606	-	299	1	38511063	38512415	-	3	ENSG00000185668	386894	0.594872	1	38631657	38950596	hmar
243	1	39484711	39485041	AluY_dup2595_1:39484711-39485041	-	331	1	39494397	39500165	+	558	ENSG00000168653	-9357	0.982143	1	38979351	48878383	no_hmar
244	1	39492750	39493039	AluSp_dup1304_1:39492750-39493039	-	290	1	39494397	39500165	+	558	ENSG00000168653	-1359	0.0548172	1	38979351	48878383	no_hmar
245	1	39587102	39587419	AluSx_dup3992_1:39587102-39587419	-	318	1	39549891	39951463	+	9591	ENSG00000127603	0	1	1	38979351	48878383	no_hmar
246	1	39939779	39940080	AluSx3_dup723_1:39939779-39940080	+	302	1	39549891	39951463	+	9591	ENSG00000127603	0	0.722222	1	38979351	48878383	no_hmar
247	1	40051858	40052153	AluSp_dup1331_1:40051858-40052153	+	296	1	40026780	40041623	-	4726	ENSG00000090621	-10236	1	1	38979351	48878383	no_hmar
248	1	40269747	40270053	AluSz_dup2437_1:40269747-40270053	-	307	1	40226094	40254157	-	49	ENSG00000116985	15591	0.952381	1	38979351	48878383	no_hmar
249	1	40278212	40278560	AluY_dup2685_1:40278212-40278560	-	349	1	40226094	40254157	-	49	ENSG00000116985	24056	0.875	1	38979351	48878383	no_hmar
250	1	40438705	40439014	AluY_dup2697_1:40438705-40439014	-	310	1	40420965	40435237	+	46	ENSG00000168389	3469	0.93514	1	38979351	48878383	no_hmar
251	1	40597485	40597781	AluSx_dup4113_1:40597485-40597781	-	297	1	40627072	40706116	+	1306	ENSG00000117000	-29292	0.25	1	38979351	48878383	no_hmar
252	1	40859214	40859516	AluSx_dup4138_1:40859214-40859516	-	303	1	40839793	40887770	+	258	ENSG00000084070	0	0.929524	1	38979351	48878383	no_hmar
253	1	41317632	41317922	AluSx_dup4180_1:41317632-41317922	-	291	1	41327248	41327799	-	13	ENSG00000179862	-9327	0.960573	1	38979351	48878383	no_hmar
254	1	42452110	42452410	AluYk4_dup43_1:42452110-42452410	-	301	1	42619122	42621264	+	0	ENSG00000044012	-166713	0.85	1	38979351	48878383	no_hmar
255	1	42502545	42502857	AluY_dup2786_1:42502545-42502857	+	313	1	42619122	42621264	+	0	ENSG00000044012	116266	0.982079	1	38979351	48878383	no_hmar
256	1	42803071	42803201	FLAM_A_dup366_1:42803071-42803201	+	131	1	42645384	42776764	-	1104	ENSG00000198815	-26308	1	1	38979351	48878383	no_hmar
257	1	42820226	42820532	AluY_dup2799_1:42820226-42820532	+	307	1	42846606	42880642	+	82	ENSG00000177181	26075	0.888889	1	38979351	48878383	no_hmar
258	1	42822018	42822306	AluSq2_dup1470_1:42822018-42822306	-	289	1	42846606	42880642	+	82	ENSG00000177181	-24301	0.111111	1	38979351	48878383	no_hmar
259	1	42851582	42851893	AluSx_dup4247_1:42851582-42851893	-	312	1	42846606	42880642	+	82	ENSG00000177181	0	0.945782	1	38979351	48878383	no_hmar
260	1	42993527	42993836	AluSq2_dup1475_1:42993527-42993836	-	310	1	42986886	43119696	+	16	ENSG00000186409	0	0.888889	1	38979351	48878383	no_hmar
261	1	43074091	43074411	AluY_dup2812_1:43074091-43074411	+	321	1	42986886	43119696	+	16	ENSG00000186409	0	0.923077	1	38979351	48878383	no_hmar
262	1	43157133	43157178	AluJo_dup1834_1:43157133-43157178	-	46	1	43148237	43166683	+	8048	ENSG00000065978	0	1	1	38979351	48878383	no_hmar
263	1	43188606	43188924	AluY_dup2820_1:43188606-43188924	+	319	1	43200760	43205734	-	0	ENSG00000164007	11837	0.974843	1	38979351	48878383	no_hmar
264	1	43235233	43235523	AluSx3_dup775_1:43235233-43235523	+	291	1	43232983	43263893	+	35	ENSG00000164008	0	0.958333	1	38979351	48878383	no_hmar
265	1	43264404	43264714	AluYf5_dup6_1:43264404-43264714	-	311	1	43232983	43263893	+	35	ENSG00000164008	512	0.969388	1	38979351	48878383	no_hmar
266	1	43492047	43492335	AluSp_dup1420_1:43492047-43492335	+	289	1	43392715	43424322	-	1065	ENSG00000117394	-67726	0.95	1	38979351	48878383	no_hmar
267	1	43767262	43767552	AluSg_dup1117_1:43767262-43767552	+	291	1	43766743	43788390	+	3	ENSG00000066056	0	1	1	38979351	48878383	no_hmar
268	1	43863192	43863499	AluSx_dup4325_1:43863192-43863499	-	308	1	43855640	43916148	+	744	ENSG00000198198	0	0.925926	1	38979351	48878383	no_hmar
269	1	44127999	44128298	AluSg7_dup233_1:44127999-44128298	+	300	1	44118847	44170038	+	1285	ENSG00000066135	0	0.8	1	38979351	48878383	no_hmar
270	1	44310202	44310512	AluY_dup2900_1:44310202-44310512	+	311	1	44201934	44395890	+	20	ENSG00000126091	0	1	1	38979351	48878383	no_hmar
271	1	44599921	44600218	AluSx1_dup2876_1:44599921-44600218	+	298	1	44584580	44596425	+	0	ENSG00000171872	-3497	1	1	38979351	48878383	no_hmar
272	1	45179668	45179964	AluY_dup2947_1:45179668-45179964	+	297	1	45155370	45191072	+	3	ENSG00000198520	0	0.933333	1	38979351	48878383	no_hmar
273	1	45179976	45180272	AluSp_dup1472_1:45179976-45180272	+	297	1	45155370	45191072	+	3	ENSG00000198520	0	0.933333	1	38979351	48878383	no_hmar
274	1	45284243	45284575	AluSx_dup4420_1:45284243-45284575	+	333	1	45286364	45308604	-	23	ENSG00000117425	1790	0.937895	1	38979351	48878383	no_hmar
275	1	45309224	45309515	AluSx_dup4426_1:45309224-45309515	-	292	1	45286364	45308604	-	23	ENSG00000117425	621	0.984849	1	38979351	48878383	no_hmar
276	1	45494154	45494456	AluSx1_dup2934_1:45494154-45494456	+	303	1	45484129	45672022	-	29	ENSG00000162415	0	0.975309	1	38979351	48878383	no_hmar
277	1	45768240	45768525	AluSx1_dup2945_1:45768240-45768525	+	286	1	45792821	45793933	+	1	ENSG00000186603	24297	0.708333	1	38979351	48878383	no_hmar
278	1	45775703	45776004	AluY_dup2990_1:45775703-45776004	+	302	1	45792821	45793933	+	1	ENSG00000186603	16818	0.626667	1	38979351	48878383	no_hmar
279	1	45950126	45950420	AluSz_dup2730_1:45950126-45950420	+	295	1	45960734	45965281	-	13	ENSG00000236624	10315	0.981536	1	38979351	48878383	no_hmar
280	1	45950851	45951158	AluY_dup3006_1:45950851-45951158	-	308	1	45960734	45965281	-	13	ENSG00000236624	-9577	0.734836	1	38979351	48878383	no_hmar
281	1	46129723	46130000	AluYc_dup205_1:46129723-46130000	+	278	1	46093931	46124759	-	1246	ENSG00000159592	-4965	1	1	38979351	48878383	no_hmar
282	1	46332406	46332721	AluSx_dup4556_1:46332406-46332721	-	316	1	46269568	46501735	+	1344	ENSG00000086015	0	0.919444	1	38979351	48878383	no_hmar
283	1	46805734	46806033	AluY_dup3100_1:46805734-46806033	-	300	1	46806499	46827515	+	222	ENSG00000117481	-467	0.0535714	1	38979351	48878383	no_hmar
284	1	47734485	47734779	AluY_dup3127_1:47734485-47734779	+	295	1	47716811	47775991	-	1145	ENSG00000123473	0	0.733283	1	38979351	48878383	no_hmar
285	1	47751536	47751845	AluSz_dup2830_1:47751536-47751845	-	310	1	47716811	47775991	-	1145	ENSG00000123473	0	0.975821	1	38979351	48878383	no_hmar
286	1	48439494	48439779	AluJb_dup4873_1:48439494-48439779	+	286	1	48231577	48462461	-	1	ENSG00000204018	0	0.941919	1	38979351	48878383	no_hmar
287	1	50870311	50870609	AluSx_dup4753_1:50870311-50870609	-	299	1	50884340	50887208	-	2	ENSG00000142700	-13732	0.546667	1	50861515	56433461	no_hmar
288	1	51128356	51128666	AluY_dup3232_1:51128356-51128666	-	311	1	50907115	51425483	-	1355	ENSG00000185104	0	0.52381	1	50861515	56433461	no_hmar
289	1	51710048	51710345	AluY_dup3262_1:51710048-51710345	-	298	1	51702429	51736991	+	300	ENSG00000123091	0	0.666667	1	50861515	56433461	no_hmar
290	1	51879807	51880111	AluSq_dup709_1:51879807-51880111	+	305	1	51822375	51984903	-	1512	ENSG00000085832	0	0.473684	1	50861515	56433461	no_hmar
291	1	51924127	51924421	AluSx_dup4851_1:51924127-51924421	+	295	1	51822375	51984903	-	1512	ENSG00000085832	0	1	1	50861515	56433461	no_hmar
292	1	52459122	52459390	AluSx1_dup3255_1:52459122-52459390	+	269	1	52385602	52442789	-	173	ENSG00000169213	-16334	0.7	1	50861515	56433461	no_hmar
293	1	52460308	52460608	AluY_dup3292_1:52460308-52460608	+	301	1	52385602	52442789	-	173	ENSG00000169213	-17520	0.759272	1	50861515	56433461	no_hmar
294	1	52485029	52485338	AluYc_dup217_1:52485029-52485338	-	310	1	52486608	52520768	-	912	ENSG00000117862	-1271	0.981818	1	50861515	56433461	no_hmar
295	1	52664744	52665034	AluY_dup3314_1:52664744-52665034	-	291	1	52698879	52811890	+	757	ENSG00000157077	-33846	0.981092	1	50861515	56433461	no_hmar
296	1	52744392	52744710	AluY_dup3318_1:52744392-52744710	-	319	1	52698879	52811890	+	757	ENSG00000157077	0	0.932099	1	50861515	56433461	no_hmar
297	1	52752768	52753078	AluSx1_dup3286_1:52752768-52753078	-	311	1	52698879	52811890	+	757	ENSG00000157077	0	0.980769	1	50861515	56433461	no_hmar
298	1	52832688	52832919	AluJb_dup5125_1:52832688-52832919	+	232	1	52818848	52830292	-	282	ENSG00000154222	-2397	0.965368	1	50861515	56433461	no_hmar
299	1	52872696	52872986	AluY_dup3338_1:52872696-52872986	-	291	1	52870422	52882359	+	619	ENSG00000134748	0	0.970109	1	50861515	56433461	no_hmar
300	1	52909628	52909921	AluSc_dup890_1:52909628-52909921	+	294	1	52874017	52991952	-	1600	ENSG00000134744	0	0.668604	1	50861515	56433461	no_hmar
301	1	53131842	53132124	AluSx1_dup3329_1:53131842-53132124	+	283	1	53099166	53122709	+	0	ENSG00000182183	-9134	0.955556	1	50861515	56433461	no_hmar
302	1	53231167	53231471	AluJr4_dup541_1:53231167-53231471	-	305	1	53192326	53287298	+	274	ENSG00000162378	0	0.833333	1	50861515	56433461	no_hmar
303	1	53306962	53307257	AluSc_dup899_1:53306962-53307257	+	296	1	53308556	53358626	+	4	ENSG00000203995	1300	0.4375	1	50861515	56433461	no_hmar
304	1	53923827	53924139	AluSx1_dup3377_1:53923827-53924139	+	313	1	53925127	53932332	+	0	ENSG00000143006	989	0.8	1	50861515	56433461	no_hmar
305	1	54364136	54364436	AluSz_dup3134_1:54364136-54364436	+	301	1	54359884	54375669	+	11	ENSG00000211452	0	0.444444	1	50861515	56433461	no_hmar
306	1	54369240	54369531	AluSz_dup3136_1:54369240-54369531	+	292	1	54359884	54375669	+	11	ENSG00000211452	0	0.809524	1	50861515	56433461	no_hmar
307	1	54424562	54424810	AluSq_dup750_1:54424562-54424810	-	249	1	54417673	54433609	+	470	ENSG00000116212	0	0.166667	1	50861515	56433461	no_hmar
308	1	54574365	54574659	AluY_dup3434_1:54574365-54574659	+	295	1	54570141	54570530	+	1	ENSG00000212670	-3836	0.861111	1	50861515	56433461	no_hmar
309	1	55094952	55095258	AluSc8_dup692_1:55094952-55095258	-	307	1	55013983	55100399	+	328	ENSG00000162390	0	0.4125	1	50861515	56433461	no_hmar
310	1	55111314	55111624	AluJb_dup5387_1:55111314-55111624	-	311	1	55118600	55175857	+	19	ENSG00000184313	-6977	0.908515	1	50861515	56433461	no_hmar
311	1	55136780	55137091	AluY_dup3468_1:55136780-55137091	+	312	1	55118600	55175857	+	19	ENSG00000184313	0	0.966928	1	50861515	56433461	no_hmar
312	1	55583120	55583443	AluYb8_dup59_1:55583120-55583443	+	324	1	55534721	55680786	-	1810	ENSG00000162402	0	1	1	50861515	56433461	no_hmar
313	1	57520144	57520450	AluY_dup3538_1:57520144-57520450	-	307	1	57476371	57756702	-	0	ENSG00000173406	0	0.51282	1	57087920	58897154	hmar
314	1	59020594	59020888	AluY_dup3588_1:59020594-59020888	+	295	1	58939548	59004966	-	259	ENSG00000162600	-15629	0.989418	1	58916350	69377756	no_hmar
315	1	59450213	59450477	AluY_dup3606_1:59450213-59450477	-	265	1	59247750	59248742	-	498	ENSG00000177606	201472	0.791667	1	58916350	69377756	no_hmar
316	1	60008119	60008426	AluSp_dup1794_1:60008119-60008426	-	308	1	59787222	60228253	+	72	ENSG00000172456	0	0.985662	1	58916350	69377756	no_hmar
317	1	60012224	60012514	AluY_dup3621_1:60012224-60012514	-	291	1	59787222	60228253	+	72	ENSG00000172456	0	1	1	58916350	69377756	no_hmar
318	1	61056023	61056275	AluY_dup3645_1:61056023-61056275	+	253	1	61331043	61921048	+	174	ENSG00000162599	274769	0.945342	1	58916350	69377756	no_hmar
319	1	61806730	61807022	AluYc_dup235_1:61806730-61807022	-	293	1	61331043	61921048	+	174	ENSG00000162599	0	0.555556	1	58916350	69377756	no_hmar
320	1	62193810	62194046	AluSc8_dup717_1:62193810-62194046	+	237	1	62149111	62190978	-	147	ENSG00000162604	-2833	0.983201	1	58916350	69377756	no_hmar
321	1	62636152	62636440	AluSx1_dup3635_1:62636152-62636440	+	289	1	62228565	62626604	+	1741	ENSG00000132849	-9549	0.940068	1	58916350	69377756	no_hmar
322	1	62760812	62761129	AluSx1_dup3650_1:62760812-62761129	-	318	1	62703952	62747236	-	0	ENSG00000132854	13577	0.333333	1	58916350	69377756	no_hmar
323	1	62762607	62762929	AluSx_dup5442_1:62762607-62762929	+	323	1	62703952	62747236	-	0	ENSG00000132854	-15372	0.873737	1	58916350	69377756	no_hmar
324	1	62825900	62826199	AluY_dup3716_1:62825900-62826199	+	300	1	62703952	62747236	-	0	ENSG00000132854	-78665	0.942857	1	58916350	69377756	no_hmar
325	1	63255203	63255509	AluY_dup3752_1:63255203-63255509	+	307	1	63269458	63329827	+	167	ENSG00000125703	13950	0.666667	1	58916350	69377756	no_hmar
326	1	63258561	63258856	AluY_dup3753_1:63258561-63258856	-	296	1	63269458	63329827	+	167	ENSG00000125703	-10603	0.45	1	58916350	69377756	no_hmar
327	1	63777863	63778171	AluSx_dup5504_1:63777863-63778171	-	309	1	63788730	63790163	+	2	ENSG00000187140	-10560	0.583333	1	58916350	69377756	no_hmar
328	1	63959815	63960089	AluSx1_dup3703_1:63959815-63960089	-	275	1	63912481	63988804	-	292	ENSG00000142856	0	0.990566	1	58916350	69377756	no_hmar
329	1	64734661	64734835	AluSx3_dup1034_1:64734661-64734835	+	175	1	64669734	64732888	+	0	ENSG00000177414	-1774	0.393467	1	58916350	69377756	no_hmar
330	1	64904105	64904403	AluYk4_dup63_1:64904105-64904403	+	299	1	64936428	65157241	+	274	ENSG00000158966	32026	0.979167	1	58916350	69377756	no_hmar
331	1	65776899	65777205	AluSx1_dup3767_1:65776899-65777205	-	307	1	65730594	65878705	+	198	ENSG00000116675	0	0.952197	1	58916350	69377756	no_hmar
332	1	66483819	66484132	AluY_dup3865_1:66483819-66484132	+	314	1	66378998	66838358	+	1210	ENSG00000184588	0	0.481482	1	58916350	69377756	no_hmar
333	1	67445447	67445746	AluSx_dup5643_1:67445447-67445746	-	300	1	67390712	67452153	+	741	ENSG00000198160	0	0.980294	1	58916350	69377756	no_hmar
334	1	67671716	67671995	AluSz6_dup1657_1:67671716-67671995	-	280	1	67633804	67724808	+	0	ENSG00000162594	0	0.962022	1	58916350	69377756	no_hmar
335	1	67910499	67910846	AluSx1_dup3831_1:67910499-67910846	+	348	1	67878893	67895983	-	3730	ENSG00000142864	-14517	0.475	1	58916350	69377756	no_hmar
336	1	68594727	68595021	AluSz6_dup1681_1:68594727-68595021	+	295	1	68564318	68697982	-	437	ENSG00000116729	0	0.916581	1	58916350	69377756	no_hmar
337	1	68781123	68781417	AluSg_dup1495_1:68781123-68781417	-	295	1	68564318	68697982	-	437	ENSG00000116729	83142	0.866667	1	58916350	69377756	no_hmar
338	1	69982644	69982932	AluY_dup3963_1:69982644-69982932	+	289	1	70034323	70594234	+	0	ENSG00000033122	51392	0.555556	1	69573474	70472079	hmar
339	1	70129386	70129703	AluYb8_dup81_1:70129386-70129703	-	318	1	70034323	70594234	+	0	ENSG00000033122	0	0.888889	1	69573474	70472079	hmar
340	1	70976116	70976424	AluSz_dup3647_1:70976116-70976424	-	309	1	70877099	70904807	+	259	ENSG00000116761	71310	0.178947	1	70482882	70989392	no_hmar
341	1	72118273	72118560	AluJb_dup6128_1:72118273-72118560	+	288	1	71873132	72748177	-	0	ENSG00000172260	0	1	1	71011367	75665688	hmar
342	1	72383192	72383481	AluYc3_dup23_1:72383192-72383481	+	290	1	71873132	72748177	-	0	ENSG00000172260	0	0.992647	1	71011367	75665688	hmar
343	1	72759662	72759968	AluSp_dup1995_1:72759662-72759968	-	307	1	71873132	72748177	-	0	ENSG00000172260	11486	0.968386	1	71011367	75665688	hmar
344	1	73386938	73387227	AluSx3_dup1091_1:73386938-73387227	-	290	1	71873132	72748177	-	0	ENSG00000172260	638762	0.944444	1	71011367	75665688	hmar
345	1	75801853	75802138	AluSz_dup3708_1:75801853-75802138	-	286	1	75669415	76007132	-	36	ENSG00000137968	0	0.948718	1	75667159	80216940	no_hmar
346	1	76230961	76231257	AluSx3_dup1104_1:76230961-76231257	+	297	1	76190473	76234903	+	381	ENSG00000117054	0	0.408463	1	75667159	80216940	no_hmar
347	1	76250713	76250985	AluY_dup4126_1:76250713-76250985	-	273	1	76251957	76260332	+	1285	ENSG00000137955	-973	0.206934	1	75667159	80216940	no_hmar
348	1	76261033	76261319	AluSg_dup1557_1:76261033-76261319	-	287	1	76251957	76260332	+	1285	ENSG00000137955	702	0.988095	1	75667159	80216940	no_hmar
349	1	76354579	76354745	AluY_dup4130_1:76354579-76354745	-	167	1	76262671	76378569	+	33	ENSG00000057468	0	0.95559	1	75667159	80216940	no_hmar
350	1	76622427	76622715	AluY_dup4144_1:76622427-76622715	-	289	1	76540552	77094488	+	25	ENSG00000184005	0	0.933333	1	75667159	80216940	no_hmar
351	1	77252923	77253228	AluY_dup4155_1:77252923-77253228	-	306	1	77333361	77528888	+	13	ENSG00000117069	-80134	0.622222	1	75667159	80216940	no_hmar
352	1	77585919	77586206	AluJb_dup6247_1:77585919-77586206	-	288	1	77558062	77685087	-	302	ENSG00000142892	0	0.714286	1	75667159	80216940	no_hmar
353	1	78147285	78147603	AluSz_dup3764_1:78147285-78147603	+	319	1	78163005	78211147	-	1187	ENSG00000077254	15403	0.282366	1	75667159	80216940	no_hmar
354	1	78405476	78405749	AluSx1_dup4027_1:78405476-78405749	+	274	1	78381792	78408595	+	31	ENSG00000162614	0	0.967742	1	75667159	80216940	no_hmar
355	1	78766012	78766320	AluY_dup4199_1:78766012-78766320	+	309	1	78511779	78601424	+	0	ENSG00000137960	-164589	0.395062	1	75667159	80216940	no_hmar
356	1	79246741	79247014	AluY_dup4204_1:79246741-79247014	+	274	1	79355503	79472339	-	0	ENSG00000162618	108490	0.381579	1	75667159	80216940	no_hmar
357	1	79267513	79267841	AluY_dup4205_1:79267513-79267841	+	329	1	79355503	79472339	-	0	ENSG00000162618	87663	0.96875	1	75667159	80216940	no_hmar
358	1	79786172	79786336	AluSx_dup5953_1:79786172-79786336	-	165	1	79355503	79472339	-	0	ENSG00000162618	313834	0.978068	1	75667159	80216940	no_hmar
359	1	79858961	79859278	AluSx1_dup4052_1:79858961-79859278	-	318	1	79355503	79472339	-	0	ENSG00000162618	386623	0.952621	1	75667159	80216940	no_hmar
360	1	80138235	80138546	AluY_dup4230_1:80138235-80138546	+	312	1	79355503	79472339	-	0	ENSG00000162618	-665897	1	1	75667159	80216940	no_hmar
361	1	80830518	80830797	AluY_dup4254_1:80830518-80830797	+	280	1	79355503	79472339	-	0	ENSG00000162618	-1358180	0.377778	1	80246724	84292419	hmar
362	1	81346372	81346650	AluY_dup4271_1:81346372-81346650	-	279	1	82302670	82456826	+	5	ENSG00000117114	-956021	0.916667	1	80246724	84292419	hmar
363	1	81991010	81991302	AluSz_dup3852_1:81991010-81991302	-	293	1	82302670	82456826	+	5	ENSG00000117114	-311369	1	1	80246724	84292419	hmar
364	1	82527386	82527691	AluSx1_dup4099_1:82527386-82527691	-	306	1	82302670	82456826	+	5	ENSG00000117114	70561	0.990253	1	80246724	84292419	hmar
365	1	82625465	82625780	AluSx3_dup1160_1:82625465-82625780	+	316	1	82302670	82456826	+	5	ENSG00000117114	-168640	0.571429	1	80246724	84292419	hmar
366	1	82789839	82790163	AluYk4_dup76_1:82789839-82790163	+	325	1	82302670	82456826	+	5	ENSG00000117114	-333014	0.928572	1	80246724	84292419	hmar
367	1	83467252	83467549	AluY_dup4317_1:83467252-83467549	+	298	1	84335648	84417894	-	250	ENSG00000137941	868100	0.967548	1	80246724	84292419	hmar
368	1	83583922	83584206	AluYc_dup277_1:83583922-83584206	-	285	1	84335648	84417894	-	250	ENSG00000137941	-751443	0.75	1	80246724	84292419	hmar
369	1	84975169	84975466	AluSx_dup6059_1:84975169-84975466	+	298	1	84967531	84971774	-	263	ENSG00000174021	-3396	0.888889	1	84337504	90542566	no_hmar
370	1	85085877	85086194	AluSc_dup1169_1:85085877-85086194	-	318	1	85096300	85097390	-	0	ENSG00000180869	-10107	0.928104	1	84337504	90542566	no_hmar
371	1	85984772	85985053	AluY_dup4384_1:85984772-85985053	-	282	1	85787138	85930728	-	167	ENSG00000153904	54045	0.9375	1	84337504	90542566	no_hmar
372	1	86347879	86348173	AluYc3_dup24_1:86347879-86348173	+	295	1	86196232	86622079	-	9	ENSG00000171502	0	0.966667	1	84337504	90542566	no_hmar
373	1	87259605	87259921	AluSq_dup886_1:87259605-87259921	+	317	1	87170583	87208915	+	360	ENSG00000097033	-50691	1	1	84337504	90542566	no_hmar
374	1	87839654	87839959	AluY_dup4448_1:87839654-87839959	+	306	1	87797699	87810476	+	207	ENSG00000143013	-29179	0.6875	1	84337504	90542566	no_hmar
375	1	88087405	88087579	AluSx4_dup230_1:88087405-88087579	+	175	1	87797699	87810476	+	207	ENSG00000143013	-276930	0.986395	1	84337504	90542566	no_hmar
376	1	88186941	88187251	AluY_dup4470_1:88186941-88187251	-	311	1	87797699	87810476	+	207	ENSG00000143013	376466	0.734455	1	84337504	90542566	no_hmar
377	1	88291731	88292036	AluY_dup4477_1:88291731-88292036	-	306	1	87797699	87810476	+	207	ENSG00000143013	481256	0.969828	1	84337504	90542566	no_hmar
378	1	88856574	88856885	AluSp_dup2146_1:88856574-88856885	-	312	1	89150264	89299128	+	1649	ENSG00000065243	-293380	0.416666	1	84337504	90542566	no_hmar
379	1	89122660	89122976	AluY_dup4494_1:89122660-89122976	+	317	1	89150264	89299128	+	1649	ENSG00000065243	27289	0.973684	1	84337504	90542566	no_hmar
380	1	89132170	89132454	AluYc3_dup25_1:89132170-89132454	+	285	1	89150264	89299128	+	1649	ENSG00000065243	17811	0.333333	1	84337504	90542566	no_hmar
381	1	90116846	90117149	AluY_dup4527_1:90116846-90117149	+	304	1	90152033	90309214	+	256	ENSG00000171488	34885	0.70851	1	84337504	90542566	no_hmar
382	1	90356433	90356738	AluY_dup4535_1:90356433-90356738	-	306	1	90398628	90401201	+	349	ENSG00000171492	-41891	0.125	1	84337504	90542566	no_hmar
383	1	91899923	91900222	AluSq_dup910_1:91899923-91900222	-	300	1	91726850	91866639	-	18	ENSG00000162669	33285	0.618687	1	91229514	101759890	no_hmar
384	1	92057664	92057957	AluY_dup4581_1:92057664-92057957	-	294	1	91967274	91989989	+	414	ENSG00000097046	67676	0.957885	1	91229514	101759890	no_hmar
385	1	92304016	92304325	AluY_dup4588_1:92304016-92304325	-	310	1	92149299	92327088	-	150	ENSG00000069702	0	0.416667	1	91229514	101759890	no_hmar
386	1	92347315	92347629	AluSc8_dup871_1:92347315-92347629	+	315	1	92149299	92327088	-	150	ENSG00000069702	-20228	0.454545	1	91229514	101759890	no_hmar
387	1	92371725	92371882	AluSx_dup6302_1:92371725-92371882	+	158	1	92149299	92327088	-	150	ENSG00000069702	-44638	0.975297	1	91229514	101759890	no_hmar
388	1	92387233	92387518	AluSz_dup4058_1:92387233-92387518	+	286	1	92428312	92479828	+	0	ENSG00000137948	40795	0.99061	1	91229514	101759890	no_hmar
389	1	92406702	92407006	AluSg_dup1707_1:92406702-92407006	-	305	1	92428312	92479828	+	0	ENSG00000137948	-21307	0.333333	1	91229514	101759890	no_hmar
390	1	92545067	92545209	AluJb_dup6804_1:92545067-92545209	-	143	1	92546129	92613355	+	23	ENSG00000189195	-921	1	1	91229514	101759890	no_hmar
391	1	92662115	92662411	AluY_dup4618_1:92662115-92662411	-	297	1	92632542	92649884	+	147	ENSG00000069712	12232	0.977273	1	91229514	101759890	no_hmar
392	1	92917743	92918048	AluSx_dup6351_1:92917743-92918048	-	306	1	92941589	92949044	-	39	ENSG00000162676	-23542	0.978836	1	91229514	101759890	no_hmar
393	1	93266474	93266781	AluY_dup4649_1:93266474-93266781	+	308	1	92979216	93257951	-	648	ENSG00000067208	-8524	0.547598	1	91229514	101759890	no_hmar
394	1	93780709	93781007	AluSx_dup6409_1:93780709-93781007	+	299	1	93812203	93826193	+	373	ENSG00000117505	31197	1	1	91229514	101759890	no_hmar
395	1	94801901	94802151	AluSx3_dup1270_1:94801901-94802151	+	251	1	94884035	94982682	+	910	ENSG00000117528	81885	0.932436	1	91229514	101759890	no_hmar
396	1	95600952	95601253	AluSz_dup4211_1:95600952-95601253	-	302	1	95609458	95657421	+	39	ENSG00000152078	-8206	0.809524	1	91229514	101759890	no_hmar
397	1	95700594	95700907	AluY_dup4747_1:95700594-95700907	-	314	1	95699787	95712423	+	135	ENSG00000122481	0	0.919103	1	91229514	101759890	no_hmar
398	1	96335755	96336061	AluY_dup4758_1:96335755-96336061	-	307	1	95699787	95712423	+	135	ENSG00000122481	623333	0.941667	1	91229514	101759890	no_hmar
399	1	97159431	97159725	AluY_dup4781_1:97159431-97159725	-	295	1	97187421	97278958	+	245	ENSG00000117569	-27697	1	1	91229514	101759890	no_hmar
400	1	97195289	97195582	AluSx3_dup1287_1:97195289-97195582	-	294	1	97187421	97278958	+	245	ENSG00000117569	0	0.771894	1	91229514	101759890	no_hmar
401	1	97263481	97263650	AluY_dup4795_1:97263481-97263650	+	170	1	97187421	97278958	+	245	ENSG00000117569	0	0.596284	1	91229514	101759890	no_hmar
402	1	98313660	98313932	AluY_dup4821_1:98313660-98313932	-	273	1	97544535	98386478	-	20	ENSG00000188641	0	0.888889	1	91229514	101759890	no_hmar
403	1	100231176	100231490	AluY_dup4856_1:100231176-100231490	+	315	1	100174457	100214324	-	120	ENSG00000156869	-16853	0.49	1	91229514	101759890	no_hmar
404	1	100253670	100253956	AluSx3_dup1301_1:100253670-100253956	+	287	1	100174457	100214324	-	120	ENSG00000156869	-39347	0.96615	1	91229514	101759890	no_hmar
405	1	100362355	100362670	AluSg_dup1788_1:100362355-100362670	-	316	1	100316599	100387204	+	974	ENSG00000162688	0	0.993903	1	91229514	101759890	no_hmar
406	1	100406731	100407038	AluSx_dup6606_1:100406731-100407038	+	308	1	100316599	100387204	+	974	ENSG00000162688	-19528	0.959677	1	91229514	101759890	no_hmar
407	1	100814469	100814766	AluSz_dup4306_1:100814469-100814766	+	298	1	100817313	100983833	+	127	ENSG00000079335	2548	0.982512	1	91229514	101759890	no_hmar
408	1	101037725	101038033	AluY_dup4879_1:101037725-101038033	+	309	1	101004523	101005674	+	0	ENSG00000181656	-32052	0.547863	1	91229514	101759890	no_hmar
409	1	101423736	101424031	AluY_dup4889_1:101423736-101424031	-	296	1	101361819	101440410	+	245	ENSG00000162695	0	0.5	1	91229514	101759890	no_hmar
410	1	101512186	101512437	AluY_dup4896_1:101512186-101512437	-	252	1	101455967	101490999	-	168	ENSG00000117543	21188	0.99	1	91229514	101759890	no_hmar
411	1	101721533	101721836	AluY_dup4903_1:101721533-101721836	+	304	1	101704541	101705686	+	0	ENSG00000170989	-15848	0.99435	1	91229514	101759890	no_hmar
412	1	102694199	102694490	AluYf4_dup64_1:102694199-102694490	+	292	1	102269797	102462372	-	0	ENSG00000118733	-231828	0.965812	1	101762377	108539811	hmar
413	1	103103553	103103872	AluY_dup4939_1:103103553-103103872	+	320	1	103343578	103573734	-	2	ENSG00000060718	239707	0	1	101762377	108539811	hmar
414	1	103232864	103233179	AluJo_dup3238_1:103232864-103233179	-	316	1	103343578	103573734	-	2	ENSG00000060718	-110400	1	1	101762377	108539811	hmar
415	1	103389483	103389791	AluY_dup4946_1:103389483-103389791	+	309	1	103343578	103573734	-	2	ENSG00000060718	0	0.96748	1	101762377	108539811	hmar
416	1	103621067	103621361	AluSp_dup2339_1:103621067-103621361	-	295	1	103343578	103573734	-	2	ENSG00000060718	47334	0.392857	1	101762377	108539811	hmar
417	1	104531516	104531819	AluJb_dup7351_1:104531516-104531819	+	304	1	104293092	104301277	+	0	ENSG00000187733	-230240	0.949495	1	101762377	108539811	hmar
418	1	105058276	105058588	AluY_dup4989_1:105058276-105058588	+	313	1	104293092	104301277	+	0	ENSG00000187733	-757000	0.222222	1	101762377	108539811	hmar
419	1	105433311	105433614	AluSx1_dup4606_1:105433311-105433614	+	304	1	104293092	104301277	+	0	ENSG00000187733	-1132035	0.963109	1	101762377	108539811	hmar
420	1	106268658	106268953	AluSx_dup6743_1:106268658-106268953	+	296	1	107599338	107600590	+	53	ENSG00000198890	1330386	0.965652	1	101762377	108539811	hmar
421	1	106619169	106619466	AluYc3_dup28_1:106619169-106619466	+	298	1	107599338	107600590	+	53	ENSG00000198890	979873	0.902581	1	101762377	108539811	hmar
422	1	106675453	106675741	AluYc_dup329_1:106675453-106675741	-	289	1	107599338	107600590	+	53	ENSG00000198890	-923598	0.969157	1	101762377	108539811	hmar
423	1	107535103	107535386	AluY_dup5064_1:107535103-107535386	+	284	1	107599338	107600590	+	53	ENSG00000198890	63953	0.946025	1	101762377	108539811	hmar
424	1	109395743	109396052	AluY_dup5108_1:109395743-109396052	-	310	1	109358796	109506096	-	7	ENSG00000162641	0	0.515152	1	108721360	111055718	no_hmar
425	1	109505210	109505508	AluSz_dup4440_1:109505210-109505508	+	299	1	109358796	109506096	-	7	ENSG00000162641	0	0.380927	1	108721360	111055718	no_hmar
426	1	109585994	109586307	AluY_dup5124_1:109585994-109586307	-	314	1	109514055	109566134	-	258	ENSG00000085433	19861	0.978572	1	108721360	111055718	no_hmar
427	1	109622353	109622648	AluY_dup5133_1:109622353-109622648	+	296	1	109607148	109618569	-	87	ENSG00000197780	-3785	0.6875	1	108721360	111055718	no_hmar
428	1	109643954	109644253	AluY_dup5136_1:109643954-109644253	-	300	1	109648653	109656299	-	6	ENSG00000179902	-4401	0.633333	1	108721360	111055718	no_hmar
429	1	109646305	109646615	AluY_dup5137_1:109646305-109646615	-	311	1	109648653	109656299	-	6	ENSG00000179902	-2039	0.75	1	108721360	111055718	no_hmar
430	1	109683465	109683773	AluSx_dup6841_1:109683465-109683773	-	309	1	109656806	109745631	+	9	ENSG00000116299	0	0.777778	1	108721360	111055718	no_hmar
431	1	110003199	110003493	AluSx1_dup4700_1:110003199-110003493	+	295	1	110009466	110022167	+	10	ENSG00000143028	5974	0.822449	1	108721360	111055718	no_hmar
432	1	110126209	110126511	AluSc8_dup949_1:110126209-110126511	-	303	1	110091343	110134852	+	1307	ENSG00000065135	0	0.968903	1	108721360	111055718	no_hmar
433	1	110186915	110187219	AluY_dup5171_1:110186915-110187219	-	305	1	110199012	110207650	+	32	ENSG00000168765	-11794	0.5625	1	108721360	111055718	no_hmar
434	1	110652902	110653210	AluSg_dup1901_1:110652902-110653210	-	309	1	110655157	110655678	+	0	ENSG00000186150	-1948	0.958333	1	108721360	111055718	no_hmar
435	1	110820492	110820779	AluJo_dup3379_1:110820492-110820779	+	288	1	110754122	110775591	+	92	ENSG00000116396	-44902	0.947369	1	108721360	111055718	no_hmar
436	1	110910456	110910749	AluY_dup5193_1:110910456-110910749	-	294	1	110906391	110931945	-	48	ENSG00000168679	0	0.991071	1	108721360	111055718	no_hmar
437	1	111354918	111355130	AluSx1_dup4744_1:111354918-111355130	-	213	1	111434031	111441814	+	1	ENSG00000143119	-78902	0.143333	1	111184970	111522443	hmar
438	1	111679594	111679896	AluYf4_dup68_1:111679594-111679896	+	303	1	111660785	111674176	-	117	ENSG00000156171	-5419	0.952381	1	111553360	112302520	no_hmar
439	1	112035157	112035455	AluSg_dup1909_1:112035157-112035455	+	299	1	112026312	112106574	-	0	ENSG00000121933	0	0.979167	1	111553360	112302520	no_hmar
440	1	112232301	112232597	AluY_dup5239_1:112232301-112232597	-	297	1	112233983	112251854	+	340	ENSG00000116473	-1387	0.935026	1	111553360	112302520	no_hmar
441	1	112933092	112933403	AluSx1_dup4768_1:112933092-112933403	+	312	1	112958788	113000031	+	446	ENSG00000143079	25386	0	1	112908447	118704253	no_hmar
442	1	112950455	112950757	AluJb_dup7673_1:112950455-112950757	-	303	1	112958788	113000031	+	446	ENSG00000143079	-8032	0.891667	1	112908447	118704253	no_hmar
443	1	113039211	113039520	AluSp_dup2447_1:113039211-113039520	-	310	1	113010160	113063128	+	16	ENSG00000134245	0	0.997076	1	112908447	118704253	no_hmar
444	1	113302121	113302425	AluSg7_dup387_1:113302121-113302425	+	305	1	113264856	113269299	+	4	ENSG00000184599	-32823	0.971015	1	112908447	118704253	no_hmar
445	1	113378691	113378995	AluSp_dup2474_1:113378691-113378995	+	305	1	113456516	113471930	-	1501	ENSG00000155380	77522	0.948718	1	112908447	118704253	no_hmar
446	1	113401721	113402033	AluSp_dup2477_1:113401721-113402033	-	313	1	113456516	113471930	-	1501	ENSG00000155380	-54484	1	1	112908447	118704253	no_hmar
447	1	114317015	114317297	AluY_dup5351_1:114317015-114317297	+	283	1	114308605	114355034	-	427	ENSG00000081019	0	0.643878	1	112908447	118704253	no_hmar
448	1	114464403	114464699	AluSg4_dup361_1:114464403-114464699	+	297	1	114471944	114516131	+	910	ENSG00000163349	7246	0.957747	1	112908447	118704253	no_hmar
449	1	114487095	114487380	AluSc_dup1522_1:114487095-114487380	-	286	1	114471944	114516131	+	910	ENSG00000163349	0	0.949495	1	112908447	118704253	no_hmar
450	1	115054669	115054973	AluSz_dup4630_1:115054669-115054973	+	305	1	114940273	115053697	-	1521	ENSG00000197323	-973	0.542004	1	112908447	118704253	no_hmar
451	1	115133118	115133418	AluYf5_dup8_1:115133118-115133418	+	301	1	115128224	115168605	-	89	ENSG00000175984	0	0.966667	1	112908447	118704253	no_hmar
452	1	116680872	116681159	AluJr_dup3475_1:116680872-116681159	+	288	1	116655237	116675983	+	2	ENSG00000173212	-4890	1	1	112908447	118704253	no_hmar
453	1	117198913	117199195	AluY_dup5429_1:117198913-117199195	-	283	1	117119937	117208948	-	455	ENSG00000143061	0	0.531073	1	112908447	118704253	no_hmar
454	1	117463252	117463545	AluSz6_dup2256_1:117463252-117463545	-	294	1	117452826	117529586	+	902	ENSG00000134247	0	0.964286	1	112908447	118704253	no_hmar
455	1	118331943	118332238	AluSc8_dup1007_1:118331943-118332238	+	296	1	118413194	118462980	-	398	ENSG00000196505	80957	0.559524	1	112908447	118704253	no_hmar
456	1	118736848	118737139	AluY_dup5475_1:118736848-118737139	-	292	1	118506425	118727780	-	2	ENSG00000155761	9069	0.568182	1	118708361	119515314	hmar
457	1	120119705	120120009	AluYa5_dup170_1:120119705-120120009	+	305	1	120165331	120168723	-	84	ENSG00000143067	45323	0.954546	1	119558886	121182415	no_hmar
458	1	120167210	120167512	AluSg_dup2041_1:120167210-120167512	-	303	1	120165331	120168723	-	84	ENSG00000143067	0	0.714647	1	119558886	121182415	no_hmar
459	1	121151907	121152159	AluY_dup5551_1:121151907-121152159	-	253	1	120927140	120935894	-	0	ENSG00000198019	216014	0.893617	1	119558886	121182415	no_hmar
460	1	142647354	142647613	AluSx_dup7265_1:142647354-142647613	-	260	1	143767357	143767848	-	0	ENSG00000236334	-1119745	0.485876	1	142582362	143472733	hmar
461	1	143146186	143146459	AluSq_dup1043_1:143146186-143146459	-	274	1	143767357	143767848	-	0	ENSG00000236334	-620899	0.73907	1	142582362	143472733	hmar
462	1	144904068	144904257	AluSx_dup7349_1:144904068-144904257	-	190	1	144852357	145075862	-	176	ENSG00000178104	0	0.333333	1	143666300	151862475	no_hmar
463	1	145072208	145072517	AluSz_dup4837_1:145072208-145072517	-	310	1	144852357	145075862	-	176	ENSG00000178104	0	0.966667	1	143666300	151862475	no_hmar
464	1	145091997	145092297	AluSx1_dup5093_1:145091997-145092297	-	301	1	144852357	145075862	-	176	ENSG00000178104	16136	0.882281	1	143666300	151862475	no_hmar
465	1	145095517	145095833	AluY_dup5658_1:145095517-145095833	-	317	1	144852357	145075862	-	176	ENSG00000178104	19656	0.96	1	143666300	151862475	no_hmar
466	1	145394116	145394424	AluSx1_dup5103_1:145394116-145394424	+	309	1	145414782	145416933	+	0	ENSG00000168509	20359	0.291667	1	143666300	151862475	no_hmar
467	1	145396143	145396309	AluJb_dup8168_1:145396143-145396309	-	167	1	145414782	145416933	+	0	ENSG00000168509	-18474	0.0555555	1	143666300	151862475	no_hmar
468	1	145399347	145399625	AluJb_dup8170_1:145399347-145399625	+	279	1	145414782	145416933	+	0	ENSG00000168509	15158	0	1	143666300	151862475	no_hmar
469	1	145514834	145515055	AluSc_dup1600_1:145514834-145515055	+	222	1	145509863	145515697	-	8	ENSG00000211451	0	0.960526	1	143666300	151862475	no_hmar
470	1	146556706	146556998	AluSx_dup7425_1:146556706-146556998	-	293	1	146631147	146643723	-	6	ENSG00000131791	-74150	0.885428	1	143666300	151862475	no_hmar
471	1	146864737	146865048	AluYa5_dup176_1:146864737-146865048	-	312	1	146714354	146767187	+	346	ENSG00000131778	97551	0.982954	1	143666300	151862475	no_hmar
472	1	147038253	147038559	AluY_dup5746_1:147038253-147038559	+	307	1	147083636	147096757	+	31	ENSG00000116128	45078	0.747271	1	143666300	151862475	no_hmar
473	1	147301069	147301369	AluY_dup5758_1:147301069-147301369	+	301	1	147230273	147231346	-	0	ENSG00000143140	-69724	0.91954	1	143666300	151862475	no_hmar
474	1	147995870	147996172	AluSx1_dup5194_1:147995870-147996172	-	303	1	148004551	148025863	-	349	ENSG00000122497	-8380	0.962963	1	143666300	151862475	no_hmar
475	1	149403912	149404213	AluY_dup5828_1:149403912-149404213	+	302	1	149400135	149400542	-	0	ENSG00000203818	-3371	0.892815	1	143666300	151862475	no_hmar
476	1	150032917	150033187	AluJr_dup3706_1:150032917-150033187	-	271	1	150039915	150117096	+	38	ENSG00000136631	-6729	0.992064	1	143666300	151862475	no_hmar
477	1	150203651	150203944	AluJb_dup8433_1:150203651-150203944	+	294	1	150192996	150208134	-	139	ENSG00000143401	0	0.875872	1	143666300	151862475	no_hmar
478	1	150274036	150274325	AluSx3_dup1519_1:150274036-150274325	-	290	1	150266787	150280659	+	158	ENSG00000187145	0	0.983333	1	143666300	151862475	no_hmar
479	1	150338074	150338367	AluSq2_dup2801_1:150338074-150338367	-	294	1	150337191	150445807	+	738	ENSG00000163125	0	0.021177	1	143666300	151862475	no_hmar
480	1	150410820	150411115	AluSx1_dup5304_1:150410820-150411115	+	296	1	150337191	150445807	+	738	ENSG00000163125	0	0.333333	1	143666300	151862475	no_hmar
481	1	150459240	150459375	AluJr_dup3727_1:150459240-150459375	+	136	1	150459927	150479537	+	218	ENSG00000143374	553	0.05	1	143666300	151862475	no_hmar
482	1	150488441	150488733	AluSg7_dup427_1:150488441-150488733	+	293	1	150480686	150485940	+	18	ENSG00000143369	-2502	0	1	143666300	151862475	no_hmar
483	1	150503689	150503965	AluSp_dup2800_1:150503689-150503965	+	277	1	150480686	150485940	+	18	ENSG00000143369	-17750	0.415205	1	143666300	151862475	no_hmar
484	1	150692837	150692975	AluSx_dup7708_1:150692837-150692975	-	139	1	150671133	150691981	-	2	ENSG00000143452	857	1	1	143666300	151862475	no_hmar
485	1	150844439	150844728	AluJb_dup8533_1:150844439-150844728	-	290	1	150784500	150849043	-	447	ENSG00000143437	0	1	1	143666300	151862475	no_hmar
486	1	150893409	150893721	AluSp_dup2823_1:150893409-150893721	+	313	1	150899254	150936837	+	684	ENSG00000143379	5534	0.972974	1	143666300	151862475	no_hmar
487	1	150896417	150896585	AluSx_dup7749_1:150896417-150896585	+	169	1	150899254	150936837	+	684	ENSG00000143379	2670	0.923368	1	143666300	151862475	no_hmar
488	1	150898001	150898306	AluY_dup5973_1:150898001-150898306	-	306	1	150899254	150936837	+	684	ENSG00000143379	-949	0.525	1	143666300	151862475	no_hmar
489	1	150993176	150993473	AluY_dup5981_1:150993176-150993473	+	298	1	150981109	151006707	+	181	ENSG00000143363	0	0.980263	1	143666300	151862475	no_hmar
490	1	151017459	151017766	AluSg_dup2186_1:151017459-151017766	+	308	1	151009202	151019160	+	10	ENSG00000163141	0	0.969697	1	143666300	151862475	no_hmar
491	1	151084806	151085116	AluSx3_dup1549_1:151084806-151085116	-	311	1	151060666	151090729	+	196	ENSG00000143458	0	0.919066	1	143666300	151862475	no_hmar
492	1	151183991	151184297	AluY_dup6016_1:151183991-151184297	+	307	1	151170494	151220420	+	785	ENSG00000143398	0	0.733333	1	143666300	151862475	no_hmar
493	1	151247508	151247799	AluSx3_dup1558_1:151247508-151247799	+	292	1	151252675	151254135	-	6	ENSG00000232671	4877	0.960784	1	143666300	151862475	no_hmar
494	1	151370172	151370339	AluJb_dup8624_1:151370172-151370339	+	168	1	151372064	151374302	+	958	ENSG00000159377	1726	0.951885	1	143666300	151862475	no_hmar
495	1	151429147	151429372	AluSx_dup7853_1:151429147-151429372	+	226	1	151377281	151414680	-	1829	ENSG00000143442	-14468	0.894737	1	143666300	151862475	no_hmar
496	1	151489019	151489317	AluSq2_dup2892_1:151489019-151489317	-	299	1	151490996	151509819	+	244	ENSG00000143375	-1680	0.666667	1	143666300	151862475	no_hmar
497	1	151738185	151738480	AluY_dup6066_1:151738185-151738480	-	296	1	151735612	151743732	+	14	ENSG00000143450	0	0.777778	1	143666300	151862475	no_hmar
498	1	151932273	151932583	AluY_dup6076_1:151932273-151932583	-	311	1	151955642	151958706	-	1216	ENSG00000197747	-23060	0.807479	1	151865772	153425454	hmar
499	1	151969070	151969371	AluSc_dup1711_1:151969070-151969371	+	302	1	151955642	151958706	-	1216	ENSG00000197747	-10365	0.472222	1	151865772	153425454	hmar
500	1	153574035	153574352	AluY_dup6111_1:153574035-153574352	+	318	1	153580013	153580627	-	376	ENSG00000188643	5662	0.944445	1	153461892	157145465	no_hmar
501	1	153612287	153612549	AluSx_dup7959_1:153612287-153612549	-	263	1	153609065	153617742	+	346	ENSG00000160679	0	0.983939	1	153461892	157145465	no_hmar
502	1	153623045	153623337	AluSx1_dup5492_1:153623045-153623337	+	293	1	153609065	153617742	+	346	ENSG00000160679	-5304	0.959142	1	153461892	157145465	no_hmar
503	1	153674309	153674619	AluSg_dup2239_1:153674309-153674619	+	311	1	153651585	153665887	+	2	ENSG00000169418	-8423	0.95935	1	153461892	157145465	no_hmar
504	1	153681474	153681784	AluY_dup6119_1:153681474-153681784	-	311	1	153651585	153665887	+	2	ENSG00000169418	15588	0.122115	1	153461892	157145465	no_hmar
505	1	153682051	153682364	AluSx1_dup5503_1:153682051-153682364	-	314	1	153651585	153665887	+	2	ENSG00000169418	16165	0.969689	1	153461892	157145465	no_hmar
506	1	153718884	153719175	AluY_dup6125_1:153718884-153719175	-	292	1	153701111	153745743	+	39	ENSG00000143624	0	0.689266	1	153461892	157145465	no_hmar
507	1	153794997	153795272	AluSg_dup2248_1:153794997-153795272	-	276	1	153782656	153800823	-	66	ENSG00000143614	0	0.981764	1	153461892	157145465	no_hmar
508	1	153858993	153859334	AluY_dup6135_1:153858993-153859334	-	342	1	153902776	153917620	-	556	ENSG00000198837	-43443	0.885714	1	153461892	157145465	no_hmar
509	1	153939981	153940157	AluJb_dup8774_1:153939981-153940157	+	177	1	153941002	153946538	+	66	ENSG00000143578	846	0	1	153461892	157145465	no_hmar
510	1	154124629	154124949	AluSx_dup8057_1:154124629-154124949	-	321	1	153965314	154127520	-	36	ENSG00000143552	0	0.121693	1	153461892	157145465	no_hmar
511	1	154156514	154156791	AluY_dup6169_1:154156514-154156791	-	278	1	154130118	154164494	-	4409	ENSG00000143549	0	0.933947	1	153461892	157145465	no_hmar
512	1	154187761	154188054	AluY_dup6173_1:154187761-154188054	+	294	1	154179932	154192883	-	739	ENSG00000143612	0	0.719298	1	153461892	157145465	no_hmar
513	1	154428680	154428982	AluSq_dup1165_1:154428680-154428982	-	303	1	154378106	154437853	+	38	ENSG00000160712	0	0.971264	1	153461892	157145465	no_hmar
514	1	154459468	154459761	AluSc_dup1751_1:154459468-154459761	+	294	1	154442820	154474502	-	0	ENSG00000169291	0	0.481481	1	153461892	157145465	no_hmar
515	1	154475782	154476093	AluSx_dup8123_1:154475782-154476093	+	312	1	154442820	154474502	-	0	ENSG00000169291	-1281	0.949583	1	153461892	157145465	no_hmar
516	1	154484808	154485117	AluSp_dup2970_1:154484808-154485117	-	310	1	154479380	154520183	+	0	ENSG00000163239	0	0.333333	1	153461892	157145465	no_hmar
517	1	154533463	154533759	AluY_dup6203_1:154533463-154533759	+	297	1	154522917	154531029	-	840	ENSG00000160714	-2435	0.901316	1	153461892	157145465	no_hmar
518	1	154580806	154581117	AluSz_dup5281_1:154580806-154581117	-	312	1	154557285	154600474	-	3970	ENSG00000160710	0	0.00408162	1	153461892	157145465	no_hmar
519	1	154664122	154664413	AluY_dup6217_1:154664122-154664413	+	292	1	154680455	154842440	-	20	ENSG00000143603	16043	0.965907	1	153461892	157145465	no_hmar
520	1	154959508	154959804	AluJb_dup8898_1:154959508-154959804	-	297	1	154956171	154965510	+	335	ENSG00000160688	0	1	1	153461892	157145465	no_hmar
521	1	154969255	154969546	AluY_dup6231_1:154969255-154969546	-	292	1	154966084	154966266	+	0	ENSG00000163352	2990	0.969697	1	153461892	157145465	no_hmar
522	1	155116197	155116496	AluSq2_dup3008_1:155116197-155116496	-	300	1	155112441	155112806	-	55	ENSG00000179085	3392	0.944142	1	153461892	157145465	no_hmar
523	1	155244194	155244349	AluJo_dup3973_1:155244194-155244349	-	156	1	155247382	155258251	+	0	ENSG00000143630	-3034	0.318631	1	153461892	157145465	no_hmar
524	1	155315621	155315924	AluSx_dup8210_1:155315621-155315924	-	304	1	155307454	155491310	-	2889	ENSG00000116539	0	0.952584	1	153461892	157145465	no_hmar
525	1	155371295	155371585	AluSx1_dup5668_1:155371295-155371585	+	291	1	155307454	155491310	-	2889	ENSG00000116539	0	0.989583	1	153461892	157145465	no_hmar
526	1	155384893	155385202	AluY_dup6274_1:155384893-155385202	+	310	1	155307454	155491310	-	2889	ENSG00000116539	0	0.52381	1	153461892	157145465	no_hmar
527	1	155393090	155393389	AluSc_dup1771_1:155393090-155393389	+	300	1	155307454	155491310	-	2889	ENSG00000116539	0	0.979636	1	153461892	157145465	no_hmar
528	1	155412097	155412406	AluSx1_dup5677_1:155412097-155412406	+	310	1	155307454	155491310	-	2889	ENSG00000116539	0	0.47619	1	153461892	157145465	no_hmar
529	1	155421834	155422129	AluSx1_dup5680_1:155421834-155422129	-	296	1	155307454	155491310	-	2889	ENSG00000116539	0	0.986111	1	153461892	157145465	no_hmar
530	1	155556951	155557252	AluSx_dup8265_1:155556951-155557252	+	302	1	155580040	155717738	+	146	ENSG00000125459	22789	0.986865	1	153461892	157145465	no_hmar
531	1	155578288	155578592	AluY_dup6300_1:155578288-155578592	-	305	1	155580040	155717738	+	146	ENSG00000125459	-1449	0.910442	1	153461892	157145465	no_hmar
532	1	155676602	155676913	AluSq2_dup3043_1:155676602-155676913	+	312	1	155580040	155717738	+	146	ENSG00000125459	0	0.592592	1	153461892	157145465	no_hmar
533	1	155847345	155847645	AluY_dup6337_1:155847345-155847645	-	301	1	155829553	155851296	+	2	ENSG00000132718	0	0.990741	1	153461892	157145465	no_hmar
534	1	156163263	156163552	AluSx_dup8349_1:156163263-156163552	-	290	1	156169639	156180219	+	74	ENSG00000160785	-6088	0	1	153461892	157145465	no_hmar
535	1	156199353	156199661	AluSp_dup3065_1:156199353-156199661	-	309	1	156182807	156212871	+	0	ENSG00000260238	0	0.957265	1	153461892	157145465	no_hmar
536	1	156239385	156239681	AluY_dup6386_1:156239385-156239681	+	297	1	156219532	156252471	-	1580	ENSG00000198952	0	0.686274	1	153461892	157145465	no_hmar
537	1	156257757	156258007	AluYk4_dup101_1:156257757-156258007	+	251	1	156255018	156261445	+	20	ENSG00000163472	0	0.983333	1	153461892	157145465	no_hmar
538	1	156415260	156415576	AluSz_dup5422_1:156415260-156415576	-	317	1	156374321	156399215	-	32	ENSG00000125462	16046	0.714286	1	153461892	157145465	no_hmar
539	1	156471696	156472005	AluSz_dup5424_1:156471696-156472005	-	310	1	156437440	156453084	-	375	ENSG00000116604	18613	0.563637	1	153461892	157145465	no_hmar
540	1	156664622	156664896	AluSz6_dup2636_1:156664622-156664896	+	275	1	156669821	156675238	-	1171	ENSG00000143320	4926	0.980378	1	153461892	157145465	no_hmar
541	1	156665996	156666291	AluY_dup6410_1:156665996-156666291	-	296	1	156669821	156675238	-	1171	ENSG00000143320	-3531	0.97421	1	153461892	157145465	no_hmar
542	1	156842468	156842768	AluY_dup6421_1:156842468-156842768	-	301	1	156785622	156851431	+	5	ENSG00000198400	0	0.805555	1	153461892	157145465	no_hmar
543	1	157049857	157050151	AluSz_dup5460_1:157049857-157050151	-	295	1	157062444	157069315	-	2	ENSG00000253831	-12294	1	1	153461892	157145465	no_hmar
544	1	157129812	157130117	AluY_dup6434_1:157129812-157130117	+	306	1	157094636	157106144	-	359	ENSG00000117036	-23669	0.625	1	153461892	157145465	no_hmar
545	1	157572748	157573040	AluY_dup6443_1:157572748-157573040	-	293	1	157545317	157567734	-	0	ENSG00000163518	5015	0.678571	1	157199679	157931383	hmar
546	1	158317652	158317912	AluY_dup6468_1:158317652-158317912	+	261	1	158323265	158326683	+	0	ENSG00000158488	5354	0.193443	1	158136836	159491714	hmar
547	1	158872474	158872784	AluY_dup6492_1:158872474-158872784	-	311	1	158906701	158946514	+	0	ENSG00000163564	-33918	0.070922	1	158136836	159491714	hmar
548	1	159107165	159107468	AluSz_dup5485_1:159107165-159107468	+	304	1	159141556	159170709	+	0	ENSG00000162706	34089	0.666667	1	158136836	159491714	hmar
549	1	159448010	159448312	AluY_dup6507_1:159448010-159448312	-	303	1	159409549	159410508	+	0	ENSG00000196184	37503	0.625	1	158136836	159491714	hmar
550	1	159678925	159679225	AluYk4_dup106_1:159678925-159679225	+	301	1	159683318	159684275	-	0	ENSG00000132693	4094	0.899207	1	159525625	166232490	no_hmar
551	1	160255326	160255634	AluSx_dup8527_1:160255326-160255634	-	309	1	160249344	160254914	-	77	ENSG00000162735	413	0.821225	1	159525625	166232490	no_hmar
552	1	160348330	160348632	AluSz_dup5513_1:160348330-160348632	-	303	1	160340522	160340920	+	0	ENSG00000171786	7411	0.527778	1	159525625	166232490	no_hmar
553	1	160561170	160561367	AluY_dup6539_1:160561170-160561367	-	198	1	160518049	160549227	-	0	ENSG00000066294	11944	0.918254	1	159525625	166232490	no_hmar
554	1	160880711	160881016	AluY_dup6543_1:160880711-160881016	+	306	1	160846457	160854667	-	0	ENSG00000179914	-26045	0.633333	1	159525625	166232490	no_hmar
555	1	160952735	160953022	AluSc8_dup1208_1:160952735-160953022	+	288	1	160968664	161008745	-	493	ENSG00000158769	15643	0.965517	1	159525625	166232490	no_hmar
556	1	160975645	160975937	AluSx1_dup5931_1:160975645-160975937	+	293	1	160968664	161008745	-	493	ENSG00000158769	0	0.954955	1	159525625	166232490	no_hmar
557	1	160978005	160978307	AluY_dup6553_1:160978005-160978307	+	303	1	160968664	161008745	-	493	ENSG00000158769	0	0.802778	1	159525625	166232490	no_hmar
558	1	161080610	161080929	AluSc8_dup1210_1:161080610-161080929	-	320	1	161070476	161087816	-	1024	ENSG00000143256	0	0.736378	1	159525625	166232490	no_hmar
559	1	161113984	161114293	AluSx1_dup5943_1:161113984-161114293	+	310	1	161123788	161128279	+	159	ENSG00000143222	9496	0.989071	1	159525625	166232490	no_hmar
560	1	161121929	161122204	AluJb_dup9321_1:161121929-161122204	-	276	1	161123788	161128279	+	159	ENSG00000143222	-1585	0.985916	1	159525625	166232490	no_hmar
561	1	161214216	161214476	AluSz_dup5569_1:161214216-161214476	+	261	1	161199475	161207850	-	13	ENSG00000143257	-6367	0.96	1	159525625	166232490	no_hmar
562	1	161269682	161269835	AluJb_dup9335_1:161269682-161269835	-	154	1	161275662	161279725	-	0	ENSG00000158887	-5828	1	1	159525625	166232490	no_hmar
563	1	161297342	161297651	AluSx3_dup1718_1:161297342-161297651	-	310	1	161284196	161332327	+	221	ENSG00000143252	0	0.96875	1	159525625	166232490	no_hmar
564	1	161327196	161327487	AluSx3_dup1721_1:161327196-161327487	-	292	1	161284196	161332327	+	221	ENSG00000143252	0	0.619048	1	159525625	166232490	no_hmar
565	1	161341889	161342189	AluSz_dup5581_1:161341889-161342189	+	301	1	161334758	161337658	-	118	ENSG00000188931	-4232	0.964614	1	159525625	166232490	no_hmar
566	1	161474674	161474980	AluYk4_dup109_1:161474674-161474980	-	307	1	161475258	161487935	+	0	ENSG00000143226	-279	0.929167	1	159525625	166232490	no_hmar
567	1	161617088	161617394	AluSq2_dup3189_1:161617088-161617394	-	307	1	161551228	161647340	+	0	ENSG00000072694	0	0.944444	1	159525625	166232490	no_hmar
568	1	162446823	162447123	AluSz6_dup2713_1:162446823-162447123	+	301	1	162467041	162492337	+	1102	ENSG00000152332	19919	1	1	159525625	166232490	no_hmar
569	1	164105677	164105963	AluSx1_dup6036_1:164105677-164105963	+	287	1	164529060	164853796	+	111	ENSG00000185630	423098	0.947368	1	159525625	166232490	no_hmar
570	1	165077671	165077967	AluY_dup6682_1:165077671-165077967	-	297	1	165173120	165324796	-	0	ENSG00000162761	-95154	0.333333	1	159525625	166232490	no_hmar
571	1	165184273	165184575	AluSx1_dup6070_1:165184273-165184575	+	303	1	165173120	165324796	-	0	ENSG00000162761	0	0.555555	1	159525625	166232490	no_hmar
572	1	165347683	165347974	AluSx_dup8745_1:165347683-165347974	-	292	1	165370503	165414130	-	0	ENSG00000143171	-22530	0.96875	1	159525625	166232490	no_hmar
573	1	165809182	165809455	AluSz_dup5705_1:165809182-165809455	-	274	1	165797071	165877057	+	510	ENSG00000143179	0	0.953704	1	159525625	166232490	no_hmar
574	1	165895963	165896260	AluY_dup6705_1:165895963-165896260	-	298	1	165797071	165877057	+	510	ENSG00000143179	18907	0.2	1	159525625	166232490	no_hmar
575	1	167453733	167454039	AluSx_dup8814_1:167453733-167454039	+	307	1	167400921	167487702	-	4	ENSG00000198821	0	0.866667	1	166793683	175705581	no_hmar
576	1	167555097	167555226	AluJo_dup4257_1:167555097-167555226	-	130	1	167511538	167522978	-	199	ENSG00000143162	32120	0.833333	1	166793683	175705581	no_hmar
577	1	167857833	167858143	AluYk4_dup110_1:167857833-167858143	+	311	1	167778918	167874378	-	6	ENSG00000143199	0	0.638889	1	166793683	175705581	no_hmar
578	1	167866952	167867263	AluYa5_dup217_1:167866952-167867263	+	312	1	167778918	167874378	-	6	ENSG00000143199	0	0.822222	1	166793683	175705581	no_hmar
579	1	169284491	169284803	AluSz_dup5799_1:169284491-169284803	-	313	1	169102026	169336948	-	209	ENSG00000143156	0	1	1	166793683	175705581	no_hmar
580	1	170619550	170619824	AluSc5_dup371_1:170619550-170619824	-	275	1	170633360	170705324	+	2	ENSG00000116132	-13537	0.833333	1	166793683	175705581	no_hmar
581	1	171014131	171014440	AluYk4_dup113_1:171014131-171014440	-	310	1	170914698	171033478	+	3	ENSG00000117501	0	0.333333	1	166793683	175705581	no_hmar
582	1	171233747	171234061	AluY_dup6869_1:171233747-171234061	+	315	1	171227227	171254680	+	16	ENSG00000010932	0	0.253968	1	166793683	175705581	no_hmar
583	1	171542810	171543115	AluSx3_dup1798_1:171542810-171543115	-	306	1	171481228	171560983	+	10662	ENSG00000117523	0	0.974359	1	166793683	175705581	no_hmar
584	1	171880414	171880722	AluSq2_dup3329_1:171880414-171880722	-	309	1	171810797	172387454	+	109	ENSG00000197959	0	0.842105	1	166793683	175705581	no_hmar
585	1	172902668	172902962	AluY_dup6915_1:172902668-172902962	+	295	1	173010510	173020102	-	2	ENSG00000120337	107549	0.857143	1	166793683	175705581	no_hmar
586	1	173701055	173701349	AluSc8_dup1275_1:173701055-173701349	+	295	1	173685176	173754382	+	159	ENSG00000076321	0	0.8	1	166793683	175705581	no_hmar
587	1	174238056	174238376	AluY_dup6975_1:174238056-174238376	-	321	1	174188296	174959135	+	614	ENSG00000152061	0	0.971698	1	166793683	175705581	no_hmar
588	1	174878996	174879294	AluY_dup7004_1:174878996-174879294	+	299	1	174188296	174959135	+	614	ENSG00000152061	0	0.444445	1	166793683	175705581	no_hmar
589	1	175385863	175386143	AluY_dup7016_1:175385863-175386143	+	281	1	175292496	175375850	-	0	ENSG00000116147	-10014	0.425	1	166793683	175705581	no_hmar
590	1	176091011	176091293	AluY_dup7035_1:176091011-176091293	+	283	1	175914292	176176114	-	611	ENSG00000143207	0	0.666667	1	175859609	176190044	no_hmar
591	1	176150697	176151009	AluSc8_dup1295_1:176150697-176151009	+	313	1	175914292	176176114	-	611	ENSG00000143207	0	0.959064	1	175859609	176190044	no_hmar
592	1	176172192	176172489	AluY_dup7037_1:176172192-176172489	+	298	1	175914292	176176114	-	611	ENSG00000143207	0	0.955357	1	175859609	176190044	no_hmar
593	1	178540655	178540883	AluSx1_dup6385_1:178540655-178540883	+	229	1	178514615	178515016	+	0	ENSG00000184909	-25640	0.516667	1	177798276	181504916	no_hmar
594	1	178638166	178638444	AluY_dup7098_1:178638166-178638444	+	279	1	178745900	178885491	+	283	ENSG00000116191	107457	0.534314	1	177798276	181504916	no_hmar
595	1	178828831	178829119	AluY_dup7103_1:178828831-178829119	-	289	1	178745900	178885491	+	283	ENSG00000116191	0	0.581897	1	177798276	181504916	no_hmar
596	1	179091051	179091348	AluYc3_dup44_1:179091051-179091348	-	298	1	179076856	179198532	-	530	ENSG00000143322	0	1	1	177798276	181504916	no_hmar
597	1	179258794	179259093	AluSx3_dup1861_1:179258794-179259093	-	300	1	179271820	179322773	+	447	ENSG00000057252	-12728	0.992424	1	177798276	181504916	no_hmar
598	1	179305013	179305302	AluSx1_dup6461_1:179305013-179305302	+	290	1	179271820	179322773	+	447	ENSG00000057252	0	0.5625	1	177798276	181504916	no_hmar
599	1	179469810	179470105	AluSz6_dup2933_1:179469810-179470105	-	296	1	179335645	179523651	+	92	ENSG00000162779	0	0.974359	1	177798276	181504916	no_hmar
600	1	179471418	179471724	AluSx_dup9283_1:179471418-179471724	+	307	1	179335645	179523651	+	92	ENSG00000162779	0	0.656565	1	177798276	181504916	no_hmar
601	1	179788496	179788787	AluSx1_dup6484_1:179788496-179788787	+	292	1	179782233	179783321	+	0	ENSG00000143340	-5176	0.945168	1	177798276	181504916	no_hmar
602	1	180346801	180347084	AluSp_dup3429_1:180346801-180347084	+	284	1	180257501	180471401	-	230	ENSG00000135847	0	0.533333	1	177798276	181504916	no_hmar
603	1	180985942	180986233	AluSx1_dup6544_1:180985942-180986233	+	292	1	180945709	180991809	-	271	ENSG00000135823	0	0.968031	1	177798276	181504916	no_hmar
604	1	180989017	180989362	AluSc8_dup1333_1:180989017-180989362	+	346	1	180945709	180991809	-	271	ENSG00000135823	0	0.666667	1	177798276	181504916	no_hmar
605	1	181101512	181101802	AluY_dup7208_1:181101512-181101802	-	291	1	181058039	181059019	+	370	ENSG00000162783	42494	0.98	1	177798276	181504916	no_hmar
606	1	182807623	182807966	AluSx1_dup6601_1:182807623-182807966	-	344	1	182811702	182856566	+	6389	ENSG00000135829	-3737	0.545894	1	181829360	208116112	no_hmar
607	1	182822075	182822359	AluSx_dup9439_1:182822075-182822359	-	285	1	182811702	182856566	+	6389	ENSG00000135829	0	0.977778	1	181829360	208116112	no_hmar
608	1	182914085	182914398	AluSx_dup9451_1:182914085-182914398	-	314	1	182869121	182922268	-	0	ENSG00000157060	0	0.981343	1	181829360	208116112	no_hmar
609	1	183766182	183766471	AluSx1_dup6635_1:183766182-183766471	+	290	1	183711293	183895423	+	49	ENSG00000143344	0	1	1	181829360	208116112	no_hmar
610	1	184409367	184409685	AluSx_dup9547_1:184409367-184409685	-	319	1	184446644	184588687	+	64	ENSG00000116667	-36960	0.974359	1	181829360	208116112	no_hmar
611	1	184710250	184710562	AluSq2_dup3545_1:184710250-184710562	+	313	1	184663200	184723780	-	436	ENSG00000116406	0	0.666667	1	181829360	208116112	no_hmar
612	1	184911545	184911850	AluY_dup7324_1:184911545-184911850	+	306	1	184760162	184943488	-	304	ENSG00000135842	0	0.919048	1	181829360	208116112	no_hmar
613	1	185054792	185055083	AluSx_dup9578_1:185054792-185055083	-	292	1	185056686	185069430	+	580	ENSG00000121481	-1604	0.989899	1	181829360	208116112	no_hmar
614	1	186123392	186123669	AluSq_dup1383_1:186123392-186123669	+	278	1	185703912	186159007	+	90	ENSG00000143341	0	0.722222	1	181829360	208116112	no_hmar
615	1	187041534	187041732	AluY_dup7393_1:187041534-187041732	-	199	1	186823487	186957637	+	198	ENSG00000116711	83898	0.97619	1	181829360	208116112	no_hmar
616	1	187323362	187323669	AluY_dup7406_1:187323362-187323669	+	308	1	186823487	186957637	+	198	ENSG00000116711	-365726	0.791667	1	181829360	208116112	no_hmar
617	1	187909788	187910052	AluSx1_dup6736_1:187909788-187910052	-	265	1	186823487	186957637	+	198	ENSG00000116711	952152	0.976656	1	181829360	208116112	no_hmar
618	1	187979938	187980237	AluY_dup7423_1:187979938-187980237	-	300	1	186823487	186957637	+	198	ENSG00000116711	1022302	0.916667	1	181829360	208116112	no_hmar
619	1	188296090	188296395	AluSx_dup9647_1:188296090-188296395	+	306	1	186823487	186957637	+	198	ENSG00000116711	-1338454	1	1	181829360	208116112	no_hmar
620	1	188625020	188625327	AluY_dup7439_1:188625020-188625327	-	308	1	190067151	190424020	-	0	ENSG00000162670	-1441825	1	1	181829360	208116112	no_hmar
621	1	189665489	189665691	AluSx1_dup6761_1:189665489-189665691	+	203	1	190067151	190424020	-	0	ENSG00000162670	401461	0.494167	1	181829360	208116112	no_hmar
622	1	189666333	189666636	AluSx_dup9669_1:189666333-189666636	+	304	1	190067151	190424020	-	0	ENSG00000162670	400516	0.964286	1	181829360	208116112	no_hmar
623	1	189895438	189895730	AluY_dup7479_1:189895438-189895730	+	293	1	190067151	190424020	-	0	ENSG00000162670	171422	0.980392	1	181829360	208116112	no_hmar
624	1	190234693	190234879	AluY_dup7495_1:190234693-190234879	+	187	1	190067151	190424020	-	0	ENSG00000162670	0	0.95	1	181829360	208116112	no_hmar
625	1	190628736	190629015	AluSx4_dup390_1:190628736-190629015	+	280	1	190067151	190424020	-	0	ENSG00000162670	-204717	0.981481	1	181829360	208116112	no_hmar
626	1	190959921	190960197	AluY_dup7515_1:190959921-190960197	-	277	1	190067151	190424020	-	0	ENSG00000162670	535902	0.980392	1	181829360	208116112	no_hmar
627	1	191068082	191068359	AluYa5_dup249_1:191068082-191068359	+	278	1	190067151	190424020	-	0	ENSG00000162670	-644063	0.666667	1	181829360	208116112	no_hmar
628	1	191318594	191318903	AluY_dup7525_1:191318594-191318903	-	310	1	192127768	192153681	+	0	ENSG00000150681	-808866	0.925926	1	181829360	208116112	no_hmar
629	1	191565026	191565344	AluY_dup7543_1:191565026-191565344	-	319	1	192127768	192153681	+	0	ENSG00000150681	-562425	0.918085	1	181829360	208116112	no_hmar
630	1	191980762	191980924	AluSc5_dup409_1:191980762-191980924	-	163	1	192127768	192153681	+	0	ENSG00000150681	-146845	0.944445	1	181829360	208116112	no_hmar
631	1	192176281	192176536	AluY_dup7568_1:192176281-192176536	-	256	1	192127768	192153681	+	0	ENSG00000150681	22601	0.506917	1	181829360	208116112	no_hmar
632	1	192178776	192179074	AluSp_dup3530_1:192178776-192179074	-	299	1	192127768	192153681	+	0	ENSG00000150681	25096	0.970693	1	181829360	208116112	no_hmar
633	1	193036304	193036614	AluY_dup7586_1:193036304-193036614	-	311	1	193038185	193060812	+	1000	ENSG00000116747	-1572	0.977564	1	181829360	208116112	no_hmar
634	1	193275901	193276206	AluSc_dup2139_1:193275901-193276206	+	306	1	193091331	193219839	+	1201	ENSG00000134371	-56063	1	1	181829360	208116112	no_hmar
635	1	193967012	193967316	AluY_dup7616_1:193967012-193967316	-	305	1	193091331	193219839	+	1201	ENSG00000134371	747174	0.777778	1	181829360	208116112	no_hmar
636	1	194281508	194281797	AluY_dup7632_1:194281508-194281797	+	290	1	193091331	193219839	+	1201	ENSG00000134371	-1061670	0.933446	1	181829360	208116112	no_hmar
637	1	194324949	194325109	AluSx_dup9745_1:194324949-194325109	-	161	1	193091331	193219839	+	1201	ENSG00000134371	1105111	0.25	1	181829360	208116112	no_hmar
638	1	194583523	194583805	AluSz_dup6464_1:194583523-194583805	-	283	1	193091331	193219839	+	1201	ENSG00000134371	1363685	1	1	181829360	208116112	no_hmar
639	1	194643585	194643910	AluY_dup7647_1:194643585-194643910	+	326	1	193091331	193219839	+	1201	ENSG00000134371	-1423747	0.583333	1	181829360	208116112	no_hmar
640	1	194748770	194749049	AluSq2_dup3638_1:194748770-194749049	-	280	1	196197357	196577439	-	0	ENSG00000162687	-1448309	0.311966	1	181829360	208116112	no_hmar
641	1	195990483	195990814	AluSx_dup9775_1:195990483-195990814	-	332	1	196197357	196577439	-	0	ENSG00000162687	-206544	0.958333	1	181829360	208116112	no_hmar
642	1	196351213	196351536	AluY_dup7700_1:196351213-196351536	-	324	1	196197357	196577439	-	0	ENSG00000162687	0	0.757576	1	181829360	208116112	no_hmar
643	1	196463530	196463767	AluY_dup7703_1:196463530-196463767	-	238	1	196197357	196577439	-	0	ENSG00000162687	0	0.976136	1	181829360	208116112	no_hmar
644	1	196627538	196627854	AluY_dup7707_1:196627538-196627854	-	317	1	196621248	196716440	+	0	ENSG00000000971	0	0.95	1	181829360	208116112	no_hmar
645	1	196746836	196747141	AluSz_dup6491_1:196746836-196747141	+	306	1	196744017	196762640	+	0	ENSG00000116785	0	0.952381	1	181829360	208116112	no_hmar
646	1	196932360	196932573	AluSx_dup9795_1:196932360-196932573	-	214	1	196788975	196928207	+	0	ENSG00000080910	4154	1	1	181829360	208116112	no_hmar
647	1	197172453	197172754	AluSx_dup9804_1:197172453-197172754	-	302	1	197128492	197169603	-	618	ENSG00000177888	2851	0.962173	1	181829360	208116112	no_hmar
648	1	197304615	197304926	AluSc8_dup1394_1:197304615-197304926	-	312	1	197237543	197447006	+	3	ENSG00000134376	0	0.99187	1	181829360	208116112	no_hmar
649	1	198102228	198102531	AluY_dup7757_1:198102228-198102531	+	304	1	198201711	198288649	+	298	ENSG00000151414	99181	0.985507	1	181829360	208116112	no_hmar
650	1	198913768	198914074	AluY_dup7775_1:198913768-198914074	-	307	1	198608399	198725307	+	0	ENSG00000081237	188462	0.99187	1	181829360	208116112	no_hmar
651	1	200027605	200027905	AluSx_dup9909_1:200027605-200027905	-	301	1	199996976	200143335	+	14	ENSG00000116833	0	0.9791	1	181829360	208116112	no_hmar
652	1	200182010	200182300	AluY_dup7800_1:200182010-200182300	-	291	1	199996976	200143335	+	14	ENSG00000116833	38676	0.750117	1	181829360	208116112	no_hmar
653	1	200223965	200224256	AluY_dup7802_1:200223965-200224256	-	292	1	199996976	200143335	+	14	ENSG00000116833	80631	0.625	1	181829360	208116112	no_hmar
654	1	200851353	200851665	AluSx1_dup7000_1:200851353-200851665	-	313	1	200842166	200843248	+	0	ENSG00000170128	8106	0.595238	1	181829360	208116112	no_hmar
655	1	201928821	201929157	AluY_dup7879_1:201928821-201929157	+	337	1	201924655	201938679	+	366	ENSG00000134375	0	0.677339	1	181829360	208116112	no_hmar
656	1	201930190	201930494	AluSq2_dup3733_1:201930190-201930494	-	305	1	201924655	201938679	+	366	ENSG00000134375	0	0.985714	1	181829360	208116112	no_hmar
657	1	202019668	202019978	AluY_dup7892_1:202019668-202019978	+	311	1	201980265	201984448	+	749	ENSG00000163435	-35221	0.960784	1	181829360	208116112	no_hmar
658	1	202031642	202031923	AluSc8_dup1426_1:202031642-202031923	-	282	1	201980265	201984448	+	749	ENSG00000163435	47195	0.982759	1	181829360	208116112	no_hmar
659	1	202053316	202053620	AluSq2_dup3743_1:202053316-202053620	+	305	1	202092092	202097681	+	0	ENSG00000170075	38473	0.962964	1	181829360	208116112	no_hmar
660	1	202306080	202306368	AluSg7_dup570_1:202306080-202306368	-	289	1	202300966	202304882	-	203	ENSG00000077152	1199	0.977273	1	181829360	208116112	no_hmar
661	1	202358491	202358735	AluY_dup7913_1:202358491-202358735	+	245	1	202317980	202549685	+	298	ENSG00000077157	0	0.950618	1	181829360	208116112	no_hmar
662	1	202772669	202772961	AluSq2_dup3766_1:202772669-202772961	+	293	1	202698167	202777433	-	1039	ENSG00000117139	0	1	1	181829360	208116112	no_hmar
663	1	202896529	202896824	AluJb_dup11028_1:202896529-202896824	+	296	1	202861664	202897677	-	388	ENSG00000117153	0	0.030795	1	181829360	208116112	no_hmar
664	1	203162835	203163184	AluY_dup7948_1:203162835-203163184	+	350	1	203148576	203155751	-	0	ENSG00000133048	-7085	0.786275	1	181829360	208116112	no_hmar
665	1	203248675	203248986	AluY_dup7950_1:203248675-203248986	+	312	1	203274735	203276563	+	94	ENSG00000159388	25750	1	1	181829360	208116112	no_hmar
666	1	203306543	203306831	AluY_dup7952_1:203306543-203306831	-	289	1	203311474	203317398	-	0	ENSG00000122176	-4644	0.972222	1	181829360	208116112	no_hmar
667	1	203774272	203774558	AluSx3_dup2065_1:203774272-203774558	-	287	1	203766651	203769587	+	1011	ENSG00000257315	4686	0.743566	1	181829360	208116112	no_hmar
668	1	203778301	203778603	AluSx3_dup2066_1:203778301-203778603	-	303	1	203786199	203821524	+	1809	ENSG00000058673	-7597	0.47619	1	181829360	208116112	no_hmar
669	1	204041531	204041823	AluSc8_dup1456_1:204041531-204041823	-	293	1	204082044	204095259	+	263	ENSG00000143842	-40222	0.835714	1	181829360	208116112	no_hmar
670	1	204486525	204486829	AluSq_dup1493_1:204486525-204486829	-	305	1	204494647	204527806	+	1022	ENSG00000198625	-7819	0.875	1	181829360	208116112	no_hmar
671	1	205278456	205278753	AluSg_dup2970_1:205278456-205278753	-	298	1	205272581	205290756	-	70	ENSG00000163545	0	0.146465	1	181829360	208116112	no_hmar
672	1	205380414	205380704	AluYc3_dup50_1:205380414-205380704	+	291	1	205350789	205389664	-	23	ENSG00000186007	0	0.559642	1	181829360	208116112	no_hmar
673	1	205705672	205705975	AluSx1_dup7273_1:205705672-205705975	+	304	1	205687411	205719101	-	3414	ENSG00000069275	0	0.994624	1	181829360	208116112	no_hmar
674	1	205804563	205804804	AluY_dup8062_1:205804563-205804804	+	242	1	205797751	205819200	-	9	ENSG00000162877	0	0.575375	1	181829360	208116112	no_hmar
675	1	205875713	205876006	AluY_dup8063_1:205875713-205876006	-	294	1	205884023	205904948	-	3	ENSG00000174502	-8018	0.939655	1	181829360	208116112	no_hmar
676	1	206844467	206844772	AluY_dup8090_1:206844467-206844772	-	306	1	206858575	206906060	+	47	ENSG00000162889	-13804	0.903407	1	181829360	208116112	no_hmar
677	1	207513699	207514011	AluJr_dup5092_1:207513699-207514011	-	313	1	207495111	207533011	+	776	ENSG00000196352	0	0.895833	1	181829360	208116112	no_hmar
678	1	207943113	207943406	AluSx1_dup7327_1:207943113-207943406	-	294	1	207925558	207966937	+	569	ENSG00000117335	0	0.977453	1	181829360	208116112	no_hmar
679	1	209926025	209926295	AluSz_dup6989_1:209926025-209926295	+	271	1	209933385	209955490	+	10	ENSG00000009790	7091	0.925926	1	209367816	210583489	no_hmar
680	1	210530884	210531185	AluY_dup8199_1:210530884-210531185	+	302	1	210502355	210847718	+	26	ENSG00000054392	0	0.5625	1	209367816	210583489	no_hmar
681	1	211414095	211414259	AluSx1_dup7402_1:211414095-211414259	+	165	1	211432903	211487107	+	223	ENSG00000117625	18645	0.404762	1	211363870	213483120	no_hmar
682	1	211459646	211459948	AluSc8_dup1508_1:211459646-211459948	-	303	1	211432903	211487107	+	223	ENSG00000117625	0	1	1	211363870	213483120	no_hmar
683	1	211510001	211510300	AluSz_dup7038_1:211510001-211510300	-	300	1	211526582	211546041	+	101	ENSG00000082512	-16283	0.968063	1	211363870	213483120	no_hmar
684	1	211659909	211660210	AluSq2_dup3957_1:211659909-211660210	+	302	1	211652381	211654757	-	0	ENSG00000198570	-5153	0.928571	1	211363870	213483120	no_hmar
685	1	212021262	212021579	AluY_dup8259_1:212021262-212021579	-	318	1	211923244	212002638	-	649	ENSG00000123684	18625	0.929539	1	211363870	213483120	no_hmar
686	1	212313499	212313795	AluSx_dup10563_1:212313499-212313795	-	297	1	212209233	212276279	+	756	ENSG00000143476	37221	0.98422	1	211363870	213483120	no_hmar
687	1	212379761	212380049	AluSx1_dup7461_1:212379761-212380049	-	289	1	212459453	212534109	+	333	ENSG00000066027	-79405	0.958333	1	211363870	213483120	no_hmar
688	1	212525352	212525670	AluSx1_dup7470_1:212525352-212525670	-	319	1	212459453	212534109	+	333	ENSG00000066027	0	0.85	1	211363870	213483120	no_hmar
689	1	212538769	212538958	AluSq2_dup3983_1:212538769-212538958	-	190	1	212538560	212588099	-	156	ENSG00000065600	0	0.888889	1	211363870	213483120	no_hmar
690	1	212612594	212612896	AluSp_dup3901_1:212612594-212612896	+	303	1	212606286	212619345	+	351	ENSG00000117691	0	0.958333	1	211363870	213483120	no_hmar
691	1	213030711	213031026	AluJb_dup11630_1:213030711-213031026	-	316	1	213031795	213068629	+	265	ENSG00000162769	-770	0	1	211363870	213483120	no_hmar
692	1	213142528	213142837	AluY_dup8325_1:213142528-213142837	-	310	1	213124885	213161923	+	44	ENSG00000143494	0	0.607143	1	211363870	213483120	no_hmar
693	1	213169368	213169668	AluY_dup8326_1:213169368-213169668	+	301	1	213168386	213189013	-	308	ENSG00000174606	0	0.555556	1	211363870	213483120	no_hmar
694	1	213735721	213736010	AluY_dup8347_1:213735721-213736010	-	290	1	213224747	213445974	+	564	ENSG00000136643	289748	0.96875	1	213492580	214122430	hmar
695	1	214706893	214707223	AluY_dup8367_1:214706893-214707223	+	331	1	214531268	214638146	-	1046	ENSG00000152104	-68748	1	1	214357451	215866288	no_hmar
696	1	214773221	214773505	AluSc_dup2377_1:214773221-214773505	+	285	1	214787098	214837134	+	10796	ENSG00000117724	13594	0.666667	1	214357451	215866288	no_hmar
697	1	214953856	214954163	AluSc_dup2379_1:214953856-214954163	-	308	1	214787098	214837134	+	10796	ENSG00000117724	116723	0.4	1	214357451	215866288	no_hmar
698	1	215867635	215867930	AluY_dup8398_1:215867635-215867930	+	296	1	215799126	216595678	-	1	ENSG00000042781	0	1	1	215867839	217497033	hmar
699	1	216035181	216035477	AluSc_dup2387_1:216035181-216035477	-	297	1	215799126	216595678	-	1	ENSG00000042781	0	0.444445	1	215867839	217497033	hmar
700	1	216201448	216201766	AluSz_dup7205_1:216201448-216201766	+	319	1	215799126	216595678	-	1	ENSG00000042781	0	0.592593	1	215867839	217497033	hmar
701	1	216293742	216294020	AluSg4_dup552_1:216293742-216294020	-	279	1	215799126	216595678	-	1	ENSG00000042781	0	0.285714	1	215867839	217497033	hmar
702	1	216559909	216560209	AluY_dup8412_1:216559909-216560209	+	301	1	215799126	216595678	-	1	ENSG00000042781	0	0.333333	1	215867839	217497033	hmar
703	1	217880199	217880506	AluSg_dup3116_1:217880199-217880506	-	308	1	217804721	218036193	+	24	ENSG00000162814	0	1	1	217585904	226262771	no_hmar
704	1	217966558	217966860	AluY_dup8450_1:217966558-217966860	-	303	1	217804721	218036193	+	24	ENSG00000162814	0	0.663339	1	217585904	226262771	no_hmar
705	1	218071702	218072000	AluSz_dup7245_1:218071702-218072000	-	299	1	217804721	218036193	+	24	ENSG00000162814	35510	0.969947	1	217585904	226262771	no_hmar
706	1	218308442	218308615	AluYc_dup600_1:218308442-218308615	-	174	1	218458659	218504430	+	287	ENSG00000067533	-150045	0.545454	1	217585904	226262771	no_hmar
707	1	218542317	218542626	AluSc_dup2410_1:218542317-218542626	+	310	1	218520044	218614701	+	13	ENSG00000092969	0	1	1	217585904	226262771	no_hmar
708	1	218554589	218554894	AluY_dup8469_1:218554589-218554894	-	306	1	218520044	218614701	+	13	ENSG00000092969	0	0.6	1	217585904	226262771	no_hmar
709	1	218916576	218916854	AluY_dup8502_1:218916576-218916854	+	279	1	218683438	218698867	+	0	ENSG00000228208	-217710	0.908137	1	217585904	226262771	no_hmar
710	1	219487776	219488072	AluYc_dup601_1:219487776-219488072	-	297	1	219347233	219385067	+	179	ENSG00000143353	102710	0.6	1	217585904	226262771	no_hmar
711	1	219653624	219653915	AluYf4_dup110_1:219653624-219653915	-	292	1	219347233	219385067	+	179	ENSG00000143353	268558	0.880749	1	217585904	226262771	no_hmar
712	1	220174041	220174314	AluSz6_dup3527_1:220174041-220174314	+	274	1	220142151	220219730	-	6781	ENSG00000136628	0	0.973118	1	217585904	226262771	no_hmar
713	1	220220653	220220958	AluSg_dup3135_1:220220653-220220958	+	306	1	220142151	220219730	-	6781	ENSG00000136628	-924	0.935139	1	217585904	226262771	no_hmar
714	1	220462303	220462595	AluSx_dup10862_1:220462303-220462595	-	293	1	220324596	220445679	-	917	ENSG00000118873	16625	0.987936	1	217585904	226262771	no_hmar
715	1	221264772	221265065	AluY_dup8586_1:221264772-221265065	-	294	1	221053200	221058043	+	29	ENSG00000136630	206730	0.857143	1	217585904	226262771	no_hmar
716	1	221865280	221865604	AluY_dup8607_1:221865280-221865604	+	325	1	221875757	221913086	-	33	ENSG00000143507	10154	0.813187	1	217585904	226262771	no_hmar
717	1	223554110	223554425	AluSq2_dup4143_1:223554110-223554425	-	316	1	223566818	223568686	+	0	ENSG00000178395	-12394	0.85755	1	217585904	226262771	no_hmar
718	1	224179715	224179852	AluJo_dup5473_1:224179715-224179852	-	138	1	224301832	224345445	+	309	ENSG00000143756	-121981	0.051282	1	217585904	226262771	no_hmar
719	1	224239255	224239559	AluSq2_dup4161_1:224239255-224239559	+	305	1	224301832	224345445	+	309	ENSG00000143756	62274	0.840375	1	217585904	226262771	no_hmar
720	1	224251007	224251314	AluY_dup8667_1:224251007-224251314	-	308	1	224301832	224345445	+	309	ENSG00000143756	-50519	0.959592	1	217585904	226262771	no_hmar
721	1	224374134	224374439	AluY_dup8681_1:224374134-224374439	+	306	1	224363631	224380177	+	152	ENSG00000143753	0	1	1	217585904	226262771	no_hmar
722	1	224452455	224452746	AluSc8_dup1580_1:224452455-224452746	-	292	1	224415331	224517829	-	367	ENSG00000143748	0	0.983333	1	217585904	226262771	no_hmar
723	1	224662451	224662774	AluY_dup8718_1:224662451-224662774	+	324	1	224577540	224621807	-	1050	ENSG00000162923	-40645	0.964286	1	217585904	226262771	no_hmar
724	1	225646559	225646865	AluY_dup8750_1:225646559-225646865	+	307	1	225591008	225611777	-	1148	ENSG00000143815	-34783	0.5625	1	217585904	226262771	no_hmar
725	1	225663434	225663730	AluSq2_dup4203_1:225663434-225663730	+	297	1	225685480	225840392	-	1577	ENSG00000154380	21751	0.872727	1	217585904	226262771	no_hmar
726	1	225749993	225750303	AluY_dup8755_1:225749993-225750303	+	311	1	225685480	225840392	-	1577	ENSG00000154380	0	0.977011	1	217585904	226262771	no_hmar
727	1	225851510	225851803	AluSx_dup11130_1:225851510-225851803	+	294	1	225685480	225840392	-	1577	ENSG00000154380	-11119	0.555556	1	217585904	226262771	no_hmar
728	1	225867310	225867614	AluY_dup8765_1:225867310-225867614	-	305	1	225685480	225840392	-	1577	ENSG00000154380	26919	1	1	217585904	226262771	no_hmar
729	1	226003713	226004015	AluSz6_dup3624_1:226003713-226004015	+	303	1	226016431	226033045	+	324	ENSG00000143819	12417	0.949206	1	217585904	226262771	no_hmar
730	1	226148490	226148737	AluSz6_dup3630_1:226148490-226148737	+	248	1	226125144	226128840	-	0	ENSG00000143768	-19651	0.666667	1	217585904	226262771	no_hmar
731	1	226163328	226163640	AluY_dup8803_1:226163328-226163640	+	313	1	226173006	226187013	-	363	ENSG00000143751	9367	0.992	1	217585904	226262771	no_hmar
732	1	226262675	226262971	AluSx_dup11196_1:226262675-226262971	-	297	1	226252053	226259177	+	533	ENSG00000163041	3499	0.972789	1	217585904	226262771	no_hmar
733	1	226288051	226288218	AluSg4_dup580_1:226288051-226288218	-	168	1	226252053	226259177	+	533	ENSG00000163041	28875	0.316993	1	226267133	237109139	no_hmar
734	1	226937780	226938078	AluSc_dup2509_1:226937780-226938078	-	299	1	226822375	226925159	-	92	ENSG00000143772	12622	0.541667	1	226267133	237109139	no_hmar
735	1	226983245	226983555	AluY_dup8855_1:226983245-226983555	-	311	1	226822375	226925159	-	92	ENSG00000143772	58087	0.888889	1	226267133	237109139	no_hmar
736	1	227404878	227405178	AluSx1_dup7970_1:227404878-227405178	+	301	1	227181972	227504883	-	2774	ENSG00000143776	0	0.985777	1	226267133	237109139	no_hmar
737	1	227752426	227752733	AluSg_dup3268_1:227752426-227752733	-	308	1	227751396	227843526	+	107	ENSG00000181450	0	0.809618	1	226267133	237109139	no_hmar
738	1	228291220	228291508	AluSz_dup7616_1:228291220-228291508	+	289	1	228288835	228290928	-	144	ENSG00000143793	-293	0	1	226267133	237109139	no_hmar
739	1	228327212	228327475	AluJr_dup13_1:228327212-228327475	-	264	1	228328004	228336550	+	416	ENSG00000143774	-530	0.0392056	1	226267133	237109139	no_hmar
740	1	228373931	228374245	AluSq2_dup4282_1:228373931-228374245	-	315	1	228353518	228363211	+	26	ENSG00000181873	10721	0.990196	1	226267133	237109139	no_hmar
741	1	228743609	228743927	AluY_dup8917_1:228743609-228743927	-	319	1	228698126	228700004	-	0	ENSG00000215811	43606	0.938914	1	226267133	237109139	no_hmar
742	1	229021392	229021680	AluSq2_dup4295_1:229021392-229021680	+	289	1	228871490	228879484	+	35	ENSG00000116574	-141909	0.980909	1	226267133	237109139	no_hmar
743	1	229479476	229479792	AluY_dup8952_1:229479476-229479792	+	317	1	229460985	229478212	-	216	ENSG00000154429	-1265	0.926022	1	226267133	237109139	no_hmar
744	1	229603399	229603690	AluSc_dup2532_1:229603399-229603690	+	292	1	229577171	229643996	-	1198	ENSG00000069248	0	0.375	1	226267133	237109139	no_hmar
745	1	229703849	229704160	AluSx_dup11411_1:229703849-229704160	+	312	1	229653929	229694399	-	332	ENSG00000135776	-9451	0.971411	1	226267133	237109139	no_hmar
746	1	229776757	229777059	AluSz6_dup3699_1:229776757-229777059	-	303	1	229763381	229795041	+	617	ENSG00000135763	0	0.952381	1	226267133	237109139	no_hmar
747	1	229853047	229853340	AluY_dup8968_1:229853047-229853340	-	294	1	229763381	229795041	+	617	ENSG00000135763	58007	0.412699	1	226267133	237109139	no_hmar
748	1	230509445	230509727	AluJr_dup5760_1:230509445-230509727	-	283	1	230459174	230513367	-	6	ENSG00000177614	0	0.76555	1	226267133	237109139	no_hmar
749	1	230982568	230982875	AluYa5_dup304_1:230982568-230982875	+	308	1	230975601	231004258	-	304	ENSG00000119280	0	0.969697	1	226267133	237109139	no_hmar
750	1	231028352	231028658	AluSz6_dup3715_1:231028352-231028658	-	307	1	231042654	231114576	-	215	ENSG00000143643	-13997	0.388889	1	226267133	237109139	no_hmar
751	1	231379663	231379921	AluSx1_dup8103_1:231379663-231379921	-	259	1	231377125	231413285	+	657	ENSG00000116906	0	0.98718	1	226267133	237109139	no_hmar
752	1	231382634	231382922	AluY_dup9015_1:231382634-231382922	+	289	1	231377125	231413285	+	657	ENSG00000116906	0	0.875	1	226267133	237109139	no_hmar
753	1	231419726	231420053	AluJb_dup12527_1:231419726-231420053	-	328	1	231377125	231413285	+	657	ENSG00000116906	6442	0.2	1	226267133	237109139	no_hmar
754	1	231666480	231666646	AluSx1_dup8121_1:231666480-231666646	+	167	1	231664557	231700648	+	434	ENSG00000116918	0	0.979167	1	226267133	237109139	no_hmar
755	1	231788523	231788824	AluSx1_dup8125_1:231788523-231788824	-	302	1	231762614	232172574	+	43	ENSG00000162946	0	0.787406	1	226267133	237109139	no_hmar
756	1	231939414	231939720	AluY_dup9050_1:231939414-231939720	+	307	1	231762614	232172574	+	43	ENSG00000162946	0	0.733333	1	226267133	237109139	no_hmar
757	1	232095992	232096297	AluSx_dup11510_1:232095992-232096297	-	306	1	231762614	232172574	+	43	ENSG00000162946	0	0.737107	1	226267133	237109139	no_hmar
758	1	232767434	232767748	AluY_dup9074_1:232767434-232767748	+	315	1	232534876	232651085	-	551	ENSG00000116991	-116350	0.958333	1	226267133	237109139	no_hmar
759	1	232880377	232880682	AluSg_dup3330_1:232880377-232880682	+	306	1	232940770	232943910	+	0	ENSG00000212916	60089	0.333333	1	226267133	237109139	no_hmar
760	1	233169678	233169983	AluSc_dup2594_1:233169678-233169983	+	306	1	233120053	233431224	-	531	ENSG00000135749	0	0.980392	1	226267133	237109139	no_hmar
761	1	233399199	233399501	AluSx1_dup8158_1:233399199-233399501	-	303	1	233120053	233431224	-	531	ENSG00000135749	0	0.948052	1	226267133	237109139	no_hmar
762	1	234090593	234090889	AluSx_dup11590_1:234090593-234090889	-	297	1	234040824	234458986	+	69	ENSG00000183780	0	0.992424	1	226267133	237109139	no_hmar
763	1	234696268	234696584	AluJr4_dup1588_1:234696268-234696584	-	317	1	234742886	234745240	-	551	ENSG00000168264	-46303	0.361111	1	226267133	237109139	no_hmar
764	1	234836966	234837245	AluSx_dup11629_1:234836966-234837245	-	280	1	234742886	234745240	-	551	ENSG00000168264	91727	0.777778	1	226267133	237109139	no_hmar
765	1	234878028	234878335	AluY_dup9148_1:234878028-234878335	+	308	1	234742886	234745240	-	551	ENSG00000168264	-132789	0.583333	1	226267133	237109139	no_hmar
766	1	235254835	235255126	AluSx_dup11659_1:235254835-235255126	+	292	1	235275382	235292030	-	652	ENSG00000173726	20257	0.930232	1	226267133	237109139	no_hmar
767	1	235322903	235323201	AluSq_dup1701_1:235322903-235323201	+	299	1	235295031	235324549	-	559	ENSG00000188739	0	0.949253	1	226267133	237109139	no_hmar
768	1	235469980	235470269	AluSx3_dup2358_1:235469980-235470269	-	290	1	235324547	235490234	-	1230	ENSG00000054267	0	0.990196	1	226267133	237109139	no_hmar
769	1	235512962	235513260	AluSp_dup4290_1:235512962-235513260	+	299	1	235498580	235506084	+	141	ENSG00000152904	-6879	0.95	1	226267133	237109139	no_hmar
770	1	235727988	235728282	AluSc_dup2640_1:235727988-235728282	-	295	1	235715412	235747138	-	25	ENSG00000168243	0	0.989583	1	226267133	237109139	no_hmar
771	1	236108644	236108954	AluSg_dup3399_1:236108644-236108954	-	311	1	236141170	236228379	-	0	ENSG00000116962	-32217	0.989899	1	226267133	237109139	no_hmar
772	1	236280538	236280833	AluSx4_dup486_1:236280538-236280833	-	296	1	236305923	236371455	+	45	ENSG00000077585	-25091	0.912772	1	226267133	237109139	no_hmar
773	1	237134012	237134303	AluSx1_dup8389_1:237134012-237134303	-	292	1	237205822	237995944	+	0	ENSG00000198626	-71520	0.86449	1	237122879	241547738	hmar
774	1	237533962	237534259	AluY_dup9280_1:237533962-237534259	-	298	1	237205822	237995944	+	0	ENSG00000198626	0	0.619048	1	237122879	241547738	hmar
775	1	237584257	237584540	AluSc8_dup1694_1:237584257-237584540	+	284	1	237205822	237995944	+	0	ENSG00000198626	0	0.928571	1	237122879	241547738	hmar
776	1	237794917	237795232	AluY_dup9296_1:237794917-237795232	-	316	1	237205822	237995944	+	0	ENSG00000198626	0	0.866092	1	237122879	241547738	hmar
777	1	237815056	237815348	AluY_dup9300_1:237815056-237815348	+	293	1	237205822	237995944	+	0	ENSG00000198626	0	0.808743	1	237122879	241547738	hmar
778	1	238068263	238068478	AluSx_dup11892_1:238068263-238068478	+	216	1	238045725	238053935	-	0	ENSG00000116996	-14329	1	1	237122879	241547738	hmar
779	1	238490687	238490969	AluSz_dup7983_1:238490687-238490969	+	283	1	238045725	238053935	-	0	ENSG00000116996	-436753	0.916667	1	237122879	241547738	hmar
780	1	238704960	238705270	AluY_dup9336_1:238704960-238705270	-	311	1	238045725	238053935	-	0	ENSG00000116996	651026	0.750831	1	237122879	241547738	hmar
781	1	239576585	239576887	AluSx1_dup8474_1:239576585-239576887	-	303	1	240070752	240072521	+	0	ENSG00000133019	-493866	0.845301	1	237122879	241547738	hmar
782	1	240029396	240029717	AluY_dup9385_1:240029396-240029717	+	322	1	240070752	240072521	+	0	ENSG00000133019	41036	0.969697	1	237122879	241547738	hmar
783	1	240372549	240372853	AluY_dup9400_1:240372549-240372853	-	305	1	240255410	240637451	+	0	ENSG00000155816	0	1	1	237122879	241547738	hmar
784	1	240673388	240673699	AluY_dup9416_1:240673388-240673699	+	312	1	240656272	240656775	-	0	ENSG00000180875	-16614	0.944444	1	237122879	241547738	hmar
785	1	240752454	240752764	AluSp_dup4398_1:240752454-240752764	+	311	1	240656272	240656775	-	0	ENSG00000180875	-95680	0.541667	1	237122879	241547738	hmar
786	1	240812717	240812995	AluJb_dup12961_1:240812717-240812995	-	279	1	240939466	241519076	-	0	ENSG00000182901	-126472	0.222741	1	237122879	241547738	hmar
787	1	240892907	240893203	AluY_dup9434_1:240892907-240893203	+	297	1	240939466	241519076	-	0	ENSG00000182901	46264	0.666667	1	237122879	241547738	hmar
788	1	240922397	240922626	AluSz_dup8056_1:240922397-240922626	+	230	1	240939466	241519076	-	0	ENSG00000182901	16841	0.125	1	237122879	241547738	hmar
789	1	241291297	241291590	AluY_dup9451_1:241291297-241291590	+	294	1	240939466	241519076	-	0	ENSG00000182901	0	0.854907	1	237122879	241547738	hmar
790	1	241402267	241402566	AluSc8_dup1721_1:241402267-241402566	-	300	1	240939466	241519076	-	0	ENSG00000182901	0	0.0410322	1	237122879	241547738	hmar
791	1	242126291	242126578	AluSq2_dup4586_1:242126291-242126578	-	288	1	242159468	242162310	-	1	ENSG00000197769	-32891	0.977273	1	241552423	242203578	no_hmar
792	1	242184154	242184461	AluY_dup9493_1:242184154-242184461	-	308	1	242159468	242162310	-	1	ENSG00000197769	21845	0.969136	1	241552423	242203578	no_hmar
793	1	242378174	242378489	AluY_dup9504_1:242378174-242378489	-	316	1	242253159	242687578	-	0	ENSG00000180287	0	0.134943	1	242204200	243239429	hmar
794	1	243384319	243384624	AluY_dup9550_1:243384319-243384624	-	306	1	243289754	243388582	-	1105	ENSG00000143702	0	0.968254	1	243254435	243672060	no_hmar
795	1	244050757	244051027	AluY_dup9574_1:244050757-244051027	-	271	1	243663048	244006472	-	9	ENSG00000117020	44286	0.768348	1	243679203	244195618	hmar
796	1	244195515	244195797	AluY_dup9581_1:244195515-244195797	-	283	1	244214734	244218669	+	16	ENSG00000179456	-18938	0.722466	1	243679203	244195618	hmar
797	1	244527404	244527706	AluY_dup9593_1:244527404-244527706	-	303	1	244528003	244552368	+	4	ENSG00000173728	-298	0.961538	1	244242867	247581696	no_hmar
798	1	244563728	244564064	AluSx1_dup8720_1:244563728-244564064	-	337	1	244572891	244615119	-	559	ENSG00000035687	-8828	0.666667	1	244242867	247581696	no_hmar
799	1	244625125	244625434	AluJr_dup6242_1:244625125-244625434	-	310	1	244624713	244803380	+	7	ENSG00000179397	0	0.954167	1	244242867	247581696	no_hmar
800	1	244772661	244772891	AluSx_dup12195_1:244772661-244772891	-	231	1	244624713	244803380	+	7	ENSG00000179397	0	1	1	244242867	247581696	no_hmar
801	1	245068207	245068470	AluY_dup9628_1:245068207-245068470	-	264	1	245017755	245027609	-	7175	ENSG00000153187	40599	0.678572	1	244242867	247581696	no_hmar
802	1	245077302	245077593	AluSz_dup8232_1:245077302-245077593	+	292	1	245017755	245027609	-	7175	ENSG00000153187	-49694	0.957237	1	244242867	247581696	no_hmar
803	1	245103225	245103515	AluSx1_dup8767_1:245103225-245103515	+	291	1	245133425	245285247	+	18	ENSG00000203666	29911	0.967625	1	244242867	247581696	no_hmar
804	1	245671543	245671810	AluY_dup9658_1:245671543-245671810	-	268	1	245318727	245865905	+	41	ENSG00000162849	0	0.903846	1	244242867	247581696	no_hmar
805	1	246165867	246166053	AluY_dup9676_1:246165867-246166053	-	187	1	245912868	246670519	-	261	ENSG00000185420	0	0.223214	1	244242867	247581696	no_hmar
806	1	246767245	246767574	AluSx_dup12341_1:246767245-246767574	+	330	1	246754865	246829204	+	296	ENSG00000162852	0	0.964286	1	244242867	247581696	no_hmar
807	1	246771121	246771403	AluSc_dup2836_1:246771121-246771403	+	283	1	246754865	246829204	+	296	ENSG00000162852	0	0.959343	1	244242867	247581696	no_hmar
808	1	246822615	246822910	AluY_dup9706_1:246822615-246822910	+	296	1	246754865	246829204	+	296	ENSG00000162852	0	0.280629	1	244242867	247581696	no_hmar
809	1	246859536	246859719	AluSx_dup12347_1:246859536-246859719	-	184	1	246887725	246930599	+	0	ENSG00000143653	-28007	0.977272	1	244242867	247581696	no_hmar
810	1	246862237	246862359	AluJo_dup6259_1:246862237-246862359	+	123	1	246887725	246930599	+	0	ENSG00000143653	25367	0.305555	1	244242867	247581696	no_hmar
811	1	247031722	247031854	AluSx_dup12359_1:247031722-247031854	-	133	1	247004111	247094629	-	3072	ENSG00000153207	0	0.984127	1	244242867	247581696	no_hmar
812	1	247090194	247090500	AluY_dup9734_1:247090194-247090500	+	307	1	247004111	247094629	-	3072	ENSG00000153207	0	0.888889	1	244242867	247581696	no_hmar
813	1	247143191	247143506	AluY_dup9744_1:247143191-247143506	+	316	1	247109102	247171210	-	91	ENSG00000197472	0	0.65	1	244242867	247581696	no_hmar
814	1	247172926	247173210	AluSq10_dup178_1:247172926-247173210	-	285	1	247143254	247241898	-	63	ENSG00000135747	0	0.976415	1	244242867	247581696	no_hmar
815	1	247288735	247288976	AluSq4_dup133_1:247288735-247288976	-	242	1	247287173	247335179	-	156	ENSG00000196418	0	1	1	244242867	247581696	no_hmar
816	1	247407365	247407676	AluSp_dup4553_1:247407365-247407676	-	312	1	247463824	247492880	-	523	ENSG00000162714	-56149	0.9781	1	244242867	247581696	no_hmar
817	1	247441146	247441566	AluSx3_dup2510_1:247441146-247441566	+	421	1	247463824	247492880	-	523	ENSG00000162714	22259	0.92963	1	244242867	247581696	no_hmar
818	1	247448783	247449113	AluY_dup9782_1:247448783-247449113	+	331	1	247463824	247492880	-	523	ENSG00000162714	14712	0.785715	1	244242867	247581696	no_hmar
819	1	247713658	247713963	AluY_dup9792_1:247713658-247713963	+	306	1	247690258	247737681	+	0	ENSG00000169224	0	0.75	1	247582549	249090969	hmar
820	1	248019908	248020216	AluSx1_dup8901_1:248019908-248020216	+	309	1	248020549	248039788	+	0	ENSG00000162722	334	0.747165	1	247582549	249090969	hmar
821	1	248036250	248036546	AluSp_dup4568_1:248036250-248036546	+	297	1	248020549	248039788	+	0	ENSG00000162722	0	0.416667	1	247582549	249090969	hmar
822	10	184051	184356	AluSz6_dup7_10:184051-184356	-	306	10	225953	298407	+	13	ENSG00000015171	-41598	1	10	77523	1238807	no_hmar
823	10	796573	796874	AluY_dup33_10:796573-796874	+	302	10	323268	735518	-	707	ENSG00000151240	-61056	0.777778	10	77523	1238807	no_hmar
824	10	1095602	1095892	AluSp_dup19_10:1095602-1095892	-	291	10	1087130	1094943	-	145	ENSG00000067064	660	0.0708333	10	77523	1238807	no_hmar
825	10	1114140	1114413	AluY_dup65_10:1114140-1114413	+	274	10	1118096	1175281	+	107	ENSG00000047056	3684	0.969697	10	77523	1238807	no_hmar
826	10	1759762	1760069	AluSz_dup58_10:1759762-1760069	-	308	10	1229136	1779344	-	0	ENSG00000185736	0	0.111111	10	1513178	2857562	hmar
827	10	2620276	2620575	AluYk4_dup2_10:2620276-2620575	+	300	10	3109788	3179759	+	2727	ENSG00000067057	489214	0.739538	10	1513178	2857562	hmar
828	10	2671865	2672126	AluY_dup109_10:2671865-2672126	-	262	10	3109788	3179759	+	2727	ENSG00000067057	-437663	0.37963	10	1513178	2857562	hmar
829	10	3851931	3852223	AluY_dup159_10:3851931-3852223	-	293	10	3821734	3827206	-	419	ENSG00000067082	24726	0.0667291	10	2878883	6437118	no_hmar
830	10	4001088	4001384	AluSc8_dup16_10:4001088-4001384	-	297	10	3821734	3827206	-	419	ENSG00000067082	173883	0.972222	10	2878883	6437118	no_hmar
831	10	4483005	4483305	AluJo_dup74_10:4483005-4483305	-	301	10	4867180	4889719	+	53	ENSG00000165568	-383876	1	10	2878883	6437118	no_hmar
832	10	4563524	4563827	AluYk4_dup3_10:4563524-4563827	-	304	10	4867180	4889719	+	53	ENSG00000165568	-303354	0.933333	10	2878883	6437118	no_hmar
833	10	4722973	4723268	AluY_dup180_10:4722973-4723268	-	296	10	4867180	4889719	+	53	ENSG00000165568	-143913	0.866667	10	2878883	6437118	no_hmar
834	10	4856342	4856642	AluSz_dup140_10:4856342-4856642	+	301	10	4867180	4889719	+	53	ENSG00000165568	10539	0.666667	10	2878883	6437118	no_hmar
835	10	5336680	5336992	AluY_dup195_10:5336680-5336992	-	313	10	5238831	5260720	+	0	ENSG00000198610	75961	0.722222	10	2878883	6437118	no_hmar
836	10	5857462	5857767	AluSx4_dup8_10:5857462-5857767	+	306	10	5807972	5855221	-	2026	ENSG00000057608	-2242	0.777778	10	2878883	6437118	no_hmar
837	10	5878016	5878311	AluJb_dup233_10:5878016-5878311	-	296	10	5807972	5855221	-	2026	ENSG00000057608	22796	0.928571	10	2878883	6437118	no_hmar
838	10	5892731	5892899	AluSx_dup239_10:5892731-5892899	-	169	10	5920096	5931317	-	52	ENSG00000134461	-27198	0.375	10	2878883	6437118	no_hmar
839	10	5892900	5893215	AluY_dup212_10:5892900-5893215	-	316	10	5920096	5931317	-	52	ENSG00000134461	-26882	0.992188	10	2878883	6437118	no_hmar
840	10	6031345	6031666	AluSz_dup193_10:6031345-6031666	-	322	10	5991256	6019455	-	33	ENSG00000134470	11891	0.583333	10	2878883	6437118	no_hmar
841	10	6043811	6044108	AluSz6_dup85_10:6043811-6044108	+	298	10	6054838	6104114	-	0	ENSG00000134460	10731	0.730769	10	2878883	6437118	no_hmar
842	10	6648569	6648876	AluY_dup253_10:6648569-6648876	-	308	10	6470172	6557097	-	35	ENSG00000065675	91473	0.4375	10	6439151	7774783	hmar
843	10	6962944	6963248	AluSc8_dup27_10:6962944-6963248	+	305	10	7205735	7423860	-	0	ENSG00000198879	242488	0.637255	10	6439151	7774783	hmar
844	10	7637690	7637968	AluSc8_dup33_10:7637690-7637968	+	279	10	7601759	7708855	-	0	ENSG00000123243	0	0.980392	10	6439151	7774783	hmar
845	10	8021027	8021338	AluY_dup303_10:8021027-8021338	+	312	10	7860673	8056711	+	508	ENSG00000165632	0	0.636364	10	7783234	8125104	no_hmar
846	10	8207414	8207711	AluSx1_dup345_10:8207414-8207711	-	298	10	8097619	8115983	+	10	ENSG00000107485	91432	0.333333	10	8143001	11414389	hmar
847	10	8488765	8489060	AluSc5_dup30_10:8488765-8489060	-	296	10	8097619	8115983	+	10	ENSG00000107485	372783	0.888889	10	8143001	11414389	hmar
848	10	9043198	9043519	AluY_dup329_10:9043198-9043519	+	322	10	8097619	8115983	+	10	ENSG00000107485	-927216	0.4	10	8143001	11414389	hmar
849	10	10299995	10300293	AluY_dup354_10:10299995-10300293	-	299	10	11047351	11371013	+	1	ENSG00000048740	-747059	0.666667	10	8143001	11414389	hmar
850	10	10662584	10662904	AluY_dup366_10:10662584-10662904	+	321	10	11047351	11371013	+	1	ENSG00000048740	384448	0.962963	10	8143001	11414389	hmar
851	10	11627441	11627674	AluY_dup394_10:11627441-11627674	+	234	10	11504443	11639633	-	594	ENSG00000148429	0	0.5	10	11419952	13953654	no_hmar
852	10	12002810	12003107	AluJr_dup309_10:12002810-12003107	+	298	10	11963026	12077422	-	1168	ENSG00000151461	0	0.982456	10	11419952	13953654	no_hmar
853	10	12080844	12080963	AluJo_dup302_10:12080844-12080963	-	120	10	11963026	12077422	-	1168	ENSG00000151461	3423	0.97037	10	11419952	13953654	no_hmar
854	10	12086261	12086561	AluY_dup430_10:12086261-12086561	+	301	10	11963026	12077422	-	1168	ENSG00000151461	-8840	1	10	11419952	13953654	no_hmar
855	10	12176001	12176304	AluY_dup455_10:12176001-12176304	-	304	10	12171787	12211323	+	84	ENSG00000065665	0	0.416667	10	11419952	13953654	no_hmar
856	10	12203161	12203459	AluJo_dup312_10:12203161-12203459	+	299	10	12171787	12211323	+	84	ENSG00000065665	0	0.981481	10	11419952	13953654	no_hmar
857	10	12259804	12260108	AluSx3_dup107_10:12259804-12260108	+	305	10	12238245	12292536	+	1373	ENSG00000151465	0	0.25	10	11419952	13953654	no_hmar
858	10	12281430	12281723	AluSp_dup150_10:12281430-12281723	+	294	10	12238245	12292536	+	1373	ENSG00000151465	0	0.974992	10	11419952	13953654	no_hmar
859	10	12309391	12309681	AluSc_dup142_10:12309391-12309681	-	291	10	12238245	12292536	+	1373	ENSG00000151465	16856	1	10	11419952	13953654	no_hmar
860	10	12421932	12422225	AluY_dup489_10:12421932-12422225	+	294	10	12391818	12870883	+	71	ENSG00000183049	0	0.559749	10	11419952	13953654	no_hmar
861	10	12450164	12450471	AluY_dup491_10:12450164-12450471	-	308	10	12391818	12870883	+	71	ENSG00000183049	0	1	10	11419952	13953654	no_hmar
862	10	12648826	12649123	AluSc_dup156_10:12648826-12649123	-	298	10	12391818	12870883	+	71	ENSG00000183049	0	0.555555	10	11419952	13953654	no_hmar
863	10	12769767	12770064	AluSz_dup516_10:12769767-12770064	-	298	10	12391818	12870883	+	71	ENSG00000183049	0	0.153781	10	11419952	13953654	no_hmar
864	10	12852276	12852573	AluSx1_dup568_10:12852276-12852573	-	298	10	12391818	12870883	+	71	ENSG00000183049	0	0.962963	10	11419952	13953654	no_hmar
865	10	12892726	12893028	AluY_dup518_10:12892726-12893028	+	303	10	12391818	12870883	+	71	ENSG00000183049	-21844	0.90303	10	11419952	13953654	no_hmar
866	10	13085311	13085622	AluSz_dup543_10:13085311-13085622	+	312	10	12940419	13043570	-	89	ENSG00000151468	-41742	0.333333	10	11419952	13953654	no_hmar
867	10	13088425	13088737	AluSq_dup123_10:13088425-13088737	+	313	10	12940419	13043570	-	89	ENSG00000151468	-44856	0.944444	10	11419952	13953654	no_hmar
868	10	13155028	13155325	AluSz6_dup214_10:13155028-13155325	-	298	10	13151123	13178863	+	233	ENSG00000123240	0	0.962141	10	11419952	13953654	no_hmar
869	10	13200669	13200977	AluSq_dup126_10:13200669-13200977	-	309	10	13206203	13251307	+	1127	ENSG00000065328	-5227	0.973079	10	11419952	13953654	no_hmar
870	10	13298963	13299258	AluJr_dup398_10:13298963-13299258	-	296	10	13320304	13344007	-	120	ENSG00000107537	-21047	0.822695	10	11419952	13953654	no_hmar
871	10	13338683	13338992	AluY_dup543_10:13338683-13338992	+	310	10	13320304	13344007	-	120	ENSG00000107537	0	0.985714	10	11419952	13953654	no_hmar
872	10	13433505	13433813	AluY_dup553_10:13433505-13433813	-	309	10	13361145	13386950	-	617	ENSG00000086475	46556	0.876894	10	11419952	13953654	no_hmar
873	10	13601739	13602048	AluSq_dup130_10:13601739-13602048	-	310	10	13629087	13672337	+	456	ENSG00000165630	-27040	0.915344	10	11419952	13953654	no_hmar
874	10	13999257	13999554	AluSq_dup135_10:13999257-13999554	-	298	10	13693908	14372101	-	42	ENSG00000151474	0	0.466071	10	13969181	14506000	hmar
875	10	14801707	14802010	AluSx1_dup706_10:14801707-14802010	-	304	10	14563192	14816662	-	592	ENSG00000065809	0	0.873435	10	14568929	15512049	no_hmar
876	10	14966566	14966874	AluY_dup610_10:14966566-14966874	+	309	10	14941166	14996009	-	261	ENSG00000152457	0	0.777778	10	14568929	15512049	no_hmar
877	10	15284504	15284799	AluJb_dup763_10:15284504-15284799	+	296	10	15254917	15413051	-	871	ENSG00000148468	0	0.861111	10	14568929	15512049	no_hmar
878	10	15466620	15466885	AluSg_dup247_10:15466620-15466885	-	266	10	15254917	15413051	-	871	ENSG00000148468	53570	0.888889	10	14568929	15512049	no_hmar
879	10	15471940	15472222	AluY_dup639_10:15471940-15472222	-	283	10	15254917	15413051	-	871	ENSG00000148468	58890	0.8378	10	14568929	15512049	no_hmar
880	10	15523704	15523927	AluJo_dup469_10:15523704-15523927	+	224	10	15559160	15761770	-	0	ENSG00000077943	35234	0.530303	10	15513649	15715175	hmar
881	10	16632916	16633210	AluSx3_dup181_10:16632916-16633210	-	295	10	16635396	16859080	-	330	ENSG00000148484	-2187	0.988504	10	16436937	19061623	no_hmar
882	10	17266555	17266868	AluY_dup689_10:17266555-17266868	+	314	10	17271422	17279267	+	42	ENSG00000026025	4555	0.740056	10	16436937	19061623	no_hmar
883	10	17302947	17303221	AluSz_dup833_10:17302947-17303221	-	275	10	17271422	17279267	+	42	ENSG00000026025	23681	0.266667	10	16436937	19061623	no_hmar
884	10	17433244	17433560	AluY_dup696_10:17433244-17433560	-	317	10	17360697	17496254	-	24	ENSG00000148488	0	0.913004	10	16436937	19061623	no_hmar
885	10	17622099	17622400	AluY_dup703_10:17622099-17622400	+	302	10	17632366	17659338	-	15	ENSG00000165996	9967	0.988636	10	16436937	19061623	no_hmar
886	10	17684850	17685058	AluSx_dup1091_10:17684850-17685058	-	209	10	17686339	17756776	+	15	ENSG00000136738	-1282	0.97619	10	16436937	19061623	no_hmar
887	10	19392209	19392502	AluYk4_dup25_10:19392209-19392502	+	294	10	19492779	20023198	+	0	ENSG00000204740	100278	1	10	19077140	21051360	hmar
888	10	19471254	19471558	AluY_dup786_10:19471254-19471558	-	305	10	19492779	20023198	+	0	ENSG00000204740	-21222	0.890625	10	19077140	21051360	hmar
889	10	20056065	20056357	AluSc8_dup154_10:20056065-20056357	-	293	10	19492779	20023198	+	0	ENSG00000204740	32868	0.466667	10	19077140	21051360	hmar
890	10	20116478	20116787	AluSz_dup971_10:20116478-20116787	-	310	10	20106009	20568745	+	0	ENSG00000120594	0	0.514875	10	19077140	21051360	hmar
891	10	21454906	21455178	AluY_dup838_10:21454906-21455178	+	273	10	21074679	21462762	-	250	ENSG00000078114	0	0.888889	10	21088177	23793290	no_hmar
892	10	21505303	21505417	AluSg_dup322_10:21505303-21505417	+	115	10	21074679	21462762	-	250	ENSG00000078114	-42542	0.974359	10	21088177	23793290	no_hmar
893	10	21647732	21647905	AluSx_dup1298_10:21647732-21647905	-	174	10	21784532	21785743	-	3	ENSG00000204682	-136628	0.9	10	21088177	23793290	no_hmar
894	10	21745109	21745412	AluJo_dup710_10:21745109-21745412	-	304	10	21784532	21785743	-	3	ENSG00000204682	-39121	0.111111	10	21088177	23793290	no_hmar
895	10	21766530	21766828	AluSx_dup1318_10:21766530-21766828	+	299	10	21784532	21785743	-	3	ENSG00000204682	17705	0.416667	10	21088177	23793290	no_hmar
896	10	21831216	21831504	AluSq2_dup453_10:21831216-21831504	+	289	10	21823574	22030909	+	926	ENSG00000078403	0	0.983333	10	21088177	23793290	no_hmar
897	10	21832416	21832707	AluSp_dup326_10:21832416-21832707	-	292	10	21823574	22030909	+	926	ENSG00000078403	0	0.985075	10	21088177	23793290	no_hmar
898	10	21856745	21857046	AluSz6_dup403_10:21856745-21857046	-	302	10	21823574	22030909	+	926	ENSG00000078403	0	0.983333	10	21088177	23793290	no_hmar
899	10	21881373	21881692	AluYf5_10:21881373-21881692	-	320	10	21823574	22030909	+	926	ENSG00000078403	0	0.947368	10	21088177	23793290	no_hmar
900	10	21931305	21931612	AluSx_dup1340_10:21931305-21931612	+	308	10	21823574	22030909	+	926	ENSG00000078403	0	1	10	21088177	23793290	no_hmar
901	10	22014366	22014666	AluSq2_dup460_10:22014366-22014666	+	301	10	21823574	22030909	+	926	ENSG00000078403	0	0.5	10	21088177	23793290	no_hmar
902	10	22118145	22118443	AluY_dup883_10:22118145-22118443	-	299	10	22045619	22292363	-	517	ENSG00000136770	0	0.805556	10	21088177	23793290	no_hmar
903	10	22496827	22497037	AluSz6_dup422_10:22496827-22497037	+	211	10	22605346	22608988	+	409	ENSG00000148444	108310	0.982394	10	21088177	23793290	no_hmar
904	10	22551225	22551531	AluSz6_dup423_10:22551225-22551531	+	307	10	22605346	22608988	+	409	ENSG00000148444	53816	0.576923	10	21088177	23793290	no_hmar
905	10	22754891	22755196	AluJr4_dup125_10:22754891-22755196	+	306	10	22634541	22705614	+	0	ENSG00000077327	-49278	1	10	21088177	23793290	no_hmar
906	10	23774608	23774919	AluY_dup945_10:23774608-23774919	-	312	10	23728387	23729829	+	49	ENSG00000165312	44780	0.9	10	21088177	23793290	no_hmar
907	10	23793211	23793387	AluY_dup949_10:23793211-23793387	+	177	10	23728387	23729829	+	49	ENSG00000165312	-63383	0.727612	10	21088177	23793290	no_hmar
908	10	24635111	24635406	AluY_dup984_10:24635111-24635406	+	296	10	24498123	24835250	+	672	ENSG00000120549	0	0.617284	10	23816372	24659118	hmar
909	10	24991054	24991359	AluY_dup1000_10:24991054-24991359	-	306	10	24873344	25010828	-	1809	ENSG00000107863	0	0.975342	10	24673558	25849287	no_hmar
910	10	25502932	25503222	AluY_dup1014_10:25502932-25503222	-	291	10	25464350	25888200	+	27	ENSG00000151025	0	0.888889	10	24673558	25849287	no_hmar
911	10	25990092	25990395	AluSx1_dup1280_10:25990092-25990395	-	304	10	25464350	25888200	+	27	ENSG00000151025	101893	0.802632	10	25925328	26582199	hmar
912	10	26467720	26468015	AluY_dup1061_10:26467720-26468015	-	296	10	26241040	26500987	+	0	ENSG00000095777	0	1	10	25925328	26582199	hmar
913	10	26806374	26806593	AluJb_dup1474_10:26806374-26806593	-	220	10	26781256	26856414	+	0	ENSG00000077420	0	0.927778	10	26633950	35895066	no_hmar
914	10	26832114	26832425	AluSz_dup1236_10:26832114-26832425	+	312	10	26781256	26856414	+	0	ENSG00000077420	0	0.267857	10	26633950	35895066	no_hmar
915	10	27159258	27159558	AluSx1_dup1339_10:27159258-27159558	+	301	10	27037502	27149792	-	391	ENSG00000136754	-9467	0.25	10	26633950	35895066	no_hmar
916	10	27208581	27208867	AluSg_dup403_10:27208581-27208867	+	287	10	27037502	27149792	-	391	ENSG00000136754	-58790	0.991667	10	26633950	35895066	no_hmar
917	10	27209095	27209397	AluY_dup1099_10:27209095-27209397	-	303	10	27037502	27149792	-	391	ENSG00000136754	59304	0.76166	10	26633950	35895066	no_hmar
918	10	27321798	27322035	AluY_dup1109_10:27321798-27322035	+	238	10	27284002	27389255	-	510	ENSG00000107890	0	0.605263	10	26633950	35895066	no_hmar
919	10	27398298	27398600	AluY_dup1116_10:27398298-27398600	+	303	10	27400909	27443139	-	2559	ENSG00000136758	2310	0.840686	10	26633950	35895066	no_hmar
920	10	27444932	27445251	AluY_dup1121_10:27444932-27445251	-	320	10	27444356	27475462	+	461	ENSG00000120539	0	0.143321	10	26633950	35895066	no_hmar
921	10	27445759	27446031	AluSq_dup245_10:27445759-27446031	-	273	10	27444356	27475462	+	461	ENSG00000120539	0	0.952783	10	26633950	35895066	no_hmar
922	10	27478159	27478253	AluSx3_dup293_10:27478159-27478253	-	95	10	27444356	27475462	+	461	ENSG00000120539	2698	0.980676	10	26633950	35895066	no_hmar
923	10	28277267	28277566	AluSz_dup1333_10:28277267-28277566	-	300	10	28089764	28284071	-	437	ENSG00000169126	0	0.986928	10	26633950	35895066	no_hmar
924	10	28563023	28563327	AluY_dup1158_10:28563023-28563327	-	305	10	28342997	28527533	-	1397	ENSG00000150054	35491	0.892857	10	26633950	35895066	no_hmar
925	10	28645689	28646001	AluY_dup1166_10:28645689-28646001	-	313	10	28342997	28527533	-	1397	ENSG00000150054	118157	0.666667	10	26633950	35895066	no_hmar
926	10	28791347	28791655	AluY_dup1183_10:28791347-28791655	+	309	10	28822509	28908532	+	2468	ENSG00000095787	30855	0.583333	10	26633950	35895066	no_hmar
927	10	28811051	28811349	AluSx_dup1774_10:28811051-28811349	+	299	10	28822509	28908532	+	2468	ENSG00000095787	11161	0.95	10	26633950	35895066	no_hmar
928	10	28840749	28841044	AluSx_dup1777_10:28840749-28841044	-	296	10	28822509	28908532	+	2468	ENSG00000095787	0	0.454545	10	26633950	35895066	no_hmar
929	10	28857304	28857476	AluSx_dup1778_10:28857304-28857476	-	173	10	28822509	28908532	+	2468	ENSG00000095787	0	0.805556	10	26633950	35895066	no_hmar
930	10	28892580	28892871	AluY_dup1187_10:28892580-28892871	+	292	10	28822509	28908532	+	2468	ENSG00000095787	0	0.946969	10	26633950	35895066	no_hmar
931	10	28922007	28922318	AluSp_dup423_10:28922007-28922318	+	312	10	28822509	28908532	+	2468	ENSG00000095787	-13476	0.877604	10	26633950	35895066	no_hmar
932	10	29012417	29012729	AluSp_dup429_10:29012417-29012729	-	313	10	28966827	28971327	+	29	ENSG00000095739	41091	0.931553	10	26633950	35895066	no_hmar
933	10	29414218	29414515	AluY_dup1210_10:29414218-29414515	-	298	10	29578047	29599985	+	0	ENSG00000120563	-163533	0.746421	10	26633950	35895066	no_hmar
934	10	29543965	29544084	FLAM_C_dup265_10:29543965-29544084	+	120	10	29578047	29599985	+	0	ENSG00000120563	33964	0.877664	10	26633950	35895066	no_hmar
935	10	29718776	29719060	AluY_dup1217_10:29718776-29719060	+	285	10	29747179	29843987	-	956	ENSG00000197321	28120	0.791667	10	26633950	35895066	no_hmar
936	10	30027080	30027390	AluY_dup1228_10:30027080-30027390	+	311	10	29747179	29843987	-	956	ENSG00000197321	-183094	0.965278	10	26633950	35895066	no_hmar
937	10	30088512	30088829	AluSx_dup1856_10:30088512-30088829	+	318	10	30306815	30336741	-	567	ENSG00000165757	217987	0.75	10	26633950	35895066	no_hmar
938	10	30157481	30157788	AluY_dup1231_10:30157481-30157788	+	308	10	30306815	30336741	-	567	ENSG00000165757	149028	0.421279	10	26633950	35895066	no_hmar
939	10	30411720	30411997	AluY_dup1235_10:30411720-30411997	+	278	10	30306815	30336741	-	567	ENSG00000165757	-74980	0.982758	10	26633950	35895066	no_hmar
940	10	30506356	30506631	AluSz6_dup619_10:30506356-30506631	-	276	10	30602541	30654262	-	774	ENSG00000107951	-95911	0.96	10	26633950	35895066	no_hmar
941	10	30934765	30935015	AluJb_dup1805_10:30934765-30935015	+	251	10	30900887	30918634	-	0	ENSG00000151033	-16132	0.787831	10	26633950	35895066	no_hmar
942	10	31321701	31321999	AluSc_dup426_10:31321701-31321999	-	299	10	31133893	31165963	-	90	ENSG00000183621	155739	0.897436	10	26633950	35895066	no_hmar
943	10	31418567	31418858	AluSg_dup467_10:31418567-31418858	+	292	10	31608164	31816189	+	135	ENSG00000148516	189307	1	10	26633950	35895066	no_hmar
944	10	33268804	33269110	AluSz_dup1591_10:33268804-33269110	+	307	10	33190501	33224486	-	5681	ENSG00000150093	-44319	0.768868	10	26633950	35895066	no_hmar
945	10	33270069	33270345	AluJo_dup1272_10:33270069-33270345	-	277	10	33190501	33224486	-	5681	ENSG00000150093	45584	0.670817	10	26633950	35895066	no_hmar
946	10	34486661	34486954	AluSc_dup457_10:34486661-34486954	-	294	10	34400100	35103923	-	1518	ENSG00000148498	0	0.458333	10	26633950	35895066	no_hmar
947	10	34713437	34713742	AluSx_dup2144_10:34713437-34713742	-	306	10	34400100	35103923	-	1518	ENSG00000148498	0	0.958375	10	26633950	35895066	no_hmar
948	10	34835164	34835456	AluSx3_dup380_10:34835164-34835456	+	293	10	34400100	35103923	-	1518	ENSG00000148498	0	0.555556	10	26633950	35895066	no_hmar
949	10	34910195	34910423	AluSz6_dup692_10:34910195-34910423	-	229	10	34400100	35103923	-	1518	ENSG00000148498	0	1	10	26633950	35895066	no_hmar
950	10	34953429	34953713	AluSx_dup2160_10:34953429-34953713	-	285	10	34400100	35103923	-	1518	ENSG00000148498	0	0.988095	10	26633950	35895066	no_hmar
951	10	35394385	35394655	AluSc8_dup269_10:35394385-35394655	+	271	10	35299242	35363154	-	998	ENSG00000108094	-31232	0.90625	10	26633950	35895066	no_hmar
952	10	35395233	35395559	AluY_dup1408_10:35395233-35395559	-	327	10	35426764	35500728	+	100	ENSG00000095794	-31206	0.857008	10	26633950	35895066	no_hmar
953	10	36018373	36018677	AluY_dup1450_10:36018373-36018677	+	305	10	35928276	35930357	-	0	ENSG00000177283	-88017	0.604167	10	35910380	37958243	hmar
954	10	36620866	36621176	AluY_dup1463_10:36620866-36621176	+	311	10	36811747	36813162	-	42	ENSG00000229644	190572	0.686275	10	35910380	37958243	hmar
955	10	36663771	36664078	AluY_dup1472_10:36663771-36664078	+	308	10	36811747	36813162	-	42	ENSG00000229644	147670	0.843085	10	35910380	37958243	hmar
956	10	36799333	36799649	AluY_dup1497_10:36799333-36799649	-	317	10	36811747	36813162	-	42	ENSG00000229644	-12099	0.625	10	35910380	37958243	hmar
957	10	37072934	37073220	AluSc8_dup290_10:37072934-37073220	-	287	10	36811747	36813162	-	42	ENSG00000229644	259773	0.858333	10	35910380	37958243	hmar
958	10	37163070	37163378	AluY_dup1575_10:37163070-37163378	+	309	10	37414884	37520394	+	0	ENSG00000148513	251507	0.804348	10	35910380	37958243	hmar
959	10	37194009	37194308	AluY_dup1577_10:37194009-37194308	-	300	10	37414884	37520394	+	0	ENSG00000148513	-220577	0.541667	10	35910380	37958243	hmar
960	10	37412040	37412346	AluSx_dup2325_10:37412040-37412346	-	307	10	37414884	37520394	+	0	ENSG00000148513	-2539	0.644166	10	35910380	37958243	hmar
961	10	37412351	37412492	AluSx_dup2326_10:37412351-37412492	-	142	10	37414884	37520394	+	0	ENSG00000148513	-2393	0.660714	10	35910380	37958243	hmar
962	10	37869353	37869655	AluSq_dup340_10:37869353-37869655	+	303	10	37890901	37890972	-	0	ENSG00000256892	21247	0.658059	10	35910380	37958243	hmar
963	10	38607771	38608078	AluSc8_dup310_10:38607771-38608078	+	308	10	38672144	38682040	-	3	ENSG00000120555	64067	0.837398	10	38015763	38693096	no_hmar
964	10	38692714	38692853	AluJo_dup1497_10:38692714-38692853	-	140	10	38672144	38682040	-	3	ENSG00000120555	10675	0.979798	10	38015763	38693096	no_hmar
965	10	42862530	42862864	AluY_dup1676_10:42862530-42862864	-	335	10	42905534	42949833	-	42	ENSG00000182632	-42671	0.669841	10	42700411	43061945	hmar
966	10	43248186	43248471	AluJo_dup1529_10:43248186-43248471	-	286	10	43279843	43326541	+	2866	ENSG00000165733	-31373	0.541667	10	43072505	43964737	no_hmar
967	10	43819239	43819537	AluY_dup1707_10:43819239-43819537	-	299	10	43869195	43871611	+	2	ENSG00000150201	-49659	0.9	10	43072505	43964737	no_hmar
968	10	43838993	43839289	AluJb_dup2338_10:43838993-43839289	-	297	10	43869195	43871611	+	2	ENSG00000150201	-29907	0.984127	10	43072505	43964737	no_hmar
969	10	43848216	43848512	AluSx_dup2465_10:43848216-43848512	-	297	10	43869195	43871611	+	2	ENSG00000150201	-20684	0.859933	10	43072505	43964737	no_hmar
970	10	43904996	43905159	AluJb_dup2354_10:43904996-43905159	+	164	10	43882088	43883332	-	3616	ENSG00000169813	-21665	0	10	43072505	43964737	no_hmar
971	10	43906388	43906689	AluSq2_dup875_10:43906388-43906689	+	302	10	43882088	43883332	-	3616	ENSG00000169813	-23057	0.625	10	43072505	43964737	no_hmar
972	10	43916108	43916386	AluSz6_dup800_10:43916108-43916386	-	279	10	43932282	43991514	+	28	ENSG00000243660	-15897	0.324574	10	43072505	43964737	no_hmar
973	10	43928948	43929249	AluSx3_dup451_10:43928948-43929249	+	302	10	43932282	43991514	+	28	ENSG00000243660	3034	0.940789	10	43072505	43964737	no_hmar
974	10	43987880	43988165	AluY_dup1725_10:43987880-43988165	-	286	10	43932282	43991514	+	28	ENSG00000243660	0	0.869048	10	43968648	45096779	hmar
975	10	44846867	44847180	AluSx_dup2538_10:44846867-44847180	-	314	10	44793342	44880453	-	0	ENSG00000107562	0	0.263393	10	43968648	45096779	hmar
976	10	45231803	45232100	AluSx1_dup2044_10:45231803-45232100	-	298	10	45406961	45430579	+	0	ENSG00000187783	-174862	0.784314	10	45128177	54566778	no_hmar
977	10	45383098	45383396	AluY_dup1753_10:45383098-45383396	+	299	10	45406961	45430579	+	0	ENSG00000187783	23566	0.600832	10	45128177	54566778	no_hmar
978	10	45830328	45830600	AluSx_dup2563_10:45830328-45830600	-	273	10	45798887	45799870	-	0	ENSG00000256574	30459	0.855555	10	45128177	54566778	no_hmar
979	10	46050086	46050220	AluSx_dup2571_10:46050086-46050220	+	135	10	45953690	46028659	-	57	ENSG00000165406	-21428	0.958333	10	45128177	54566778	no_hmar
980	10	46247144	46247433	AluSx3_dup476_10:46247144-46247433	+	290	10	46222766	46287845	+	41	ENSG00000172661	0	0.979482	10	45128177	54566778	no_hmar
981	10	47532029	47532331	AluYa5_dup48_10:47532029-47532331	-	303	10	47658499	47701339	+	0	ENSG00000198250	-126169	0.555555	10	45128177	54566778	no_hmar
982	10	49592018	49592304	AluSx1_dup2158_10:49592018-49592304	+	287	10	49609704	49643069	+	390	ENSG00000107643	17401	0.777778	10	45128177	54566778	no_hmar
983	10	50745765	50746029	AluSq2_dup980_10:50745765-50746029	-	265	10	50666864	50741010	-	240	ENSG00000225830	4756	0.972481	10	45128177	54566778	no_hmar
984	10	50931412	50931645	AluSx_dup2764_10:50931412-50931645	-	234	10	50943277	50966638	-	188	ENSG00000197444	-11633	0.919753	10	45128177	54566778	no_hmar
985	10	51810859	51811157	AluY_dup2036_10:51810859-51811157	-	299	10	51827766	51893262	+	69	ENSG00000099290	-16610	0.933333	10	45128177	54566778	no_hmar
986	10	51834399	51834682	AluY_dup2039_10:51834399-51834682	+	284	10	51827766	51893262	+	69	ENSG00000099290	0	0.766667	10	45128177	54566778	no_hmar
987	10	52391112	52391424	AluSx1_dup2246_10:52391112-52391424	+	313	10	52066905	52384795	-	317	ENSG00000198964	-6318	0.92381	10	45128177	54566778	no_hmar
988	10	52488267	52488529	AluY_dup2063_10:52488267-52488529	+	263	10	52502685	52514497	+	20	ENSG00000204147	14157	0.520833	10	45128177	54566778	no_hmar
989	10	53285178	53285487	AluY_dup2079_10:53285178-53285487	+	310	10	52751139	54053657	+	19	ENSG00000185532	0	0.553459	10	45128177	54566778	no_hmar
990	10	53755791	53756102	AluSx3_dup518_10:53755791-53756102	+	312	10	52751139	54053657	+	19	ENSG00000185532	0	0.980392	10	45128177	54566778	no_hmar
991	10	54767919	54768107	AluYk4_dup47_10:54767919-54768107	-	189	10	54527900	54531395	-	0	ENSG00000165471	236525	0.983333	10	54626366	59734761	hmar
992	10	54795762	54796087	AluSq2_dup1036_10:54795762-54796087	-	326	10	54527900	54531395	-	0	ENSG00000165471	264368	0.993827	10	54626366	59734761	hmar
993	10	55063955	55064261	AluYc_dup174_10:55063955-55064261	+	307	10	55566342	56424022	-	0	ENSG00000150275	502082	0.971428	10	54626366	59734761	hmar
994	10	55141562	55141855	AluY_dup2121_10:55141562-55141855	+	294	10	55566342	56424022	-	0	ENSG00000150275	424488	0.675934	10	54626366	59734761	hmar
995	10	55382458	55382767	AluSc8_dup409_10:55382458-55382767	+	310	10	55566342	56424022	-	0	ENSG00000150275	183576	0.943589	10	54626366	59734761	hmar
996	10	55458609	55458921	AluY_dup2134_10:55458609-55458921	-	313	10	55566342	56424022	-	0	ENSG00000150275	-107422	0.973725	10	54626366	59734761	hmar
997	10	55651781	55652084	AluSg4_dup134_10:55651781-55652084	-	304	10	55566342	56424022	-	0	ENSG00000150275	0	0.666667	10	54626366	59734761	hmar
998	10	56195449	56195759	AluY_dup2172_10:56195449-56195759	+	311	10	55566342	56424022	-	0	ENSG00000150275	0	0.466667	10	54626366	59734761	hmar
999	10	56414690	56414975	AluY_dup2179_10:56414690-56414975	+	286	10	55566342	56424022	-	0	ENSG00000150275	0	0.666667	10	54626366	59734761	hmar
1000	10	56970380	56970685	AluSc_dup675_10:56970380-56970685	-	306	10	57359660	57359731	+	0	ENSG00000249860	-388976	0.973684	10	54626366	59734761	hmar
1001	10	57023484	57023793	AluY_dup2196_10:57023484-57023793	-	310	10	57359660	57359731	+	0	ENSG00000249860	-335868	0.833333	10	54626366	59734761	hmar
1002	10	57032153	57032446	AluSz_dup2159_10:57032153-57032446	-	294	10	57359660	57359731	+	0	ENSG00000249860	-327215	0.941177	10	54626366	59734761	hmar
1003	10	57052129	57052441	AluSq_dup444_10:57052129-57052441	-	313	10	57359660	57359731	+	0	ENSG00000249860	-307220	0.967742	10	54626366	59734761	hmar
1004	10	57673183	57673508	AluY_dup2211_10:57673183-57673508	+	326	10	57359660	57359731	+	0	ENSG00000249860	-313453	0.583333	10	54626366	59734761	hmar
1005	10	57755800	57756100	AluY_dup2214_10:57755800-57756100	-	301	10	58117893	58120997	-	578	ENSG00000122952	-361794	0.422223	10	54626366	59734761	hmar
1006	10	57885893	57886226	AluY_dup2216_10:57885893-57886226	+	334	10	58117893	58120997	-	578	ENSG00000122952	231668	0.968247	10	54626366	59734761	hmar
1007	10	58357981	58358273	AluY_dup2225_10:58357981-58358273	-	293	10	58117893	58120997	-	578	ENSG00000122952	236985	0.537415	10	54626366	59734761	hmar
1008	10	58816341	58816651	AluY_dup2240_10:58816341-58816651	+	311	10	58117893	58120997	-	578	ENSG00000122952	-695345	1	10	54626366	59734761	hmar
1009	10	59080670	59080964	AluY_dup2250_10:59080670-59080964	-	295	10	59955840	60027371	-	111	ENSG00000151151	-874877	1	10	54626366	59734761	hmar
1010	10	59239570	59239880	AluY_dup2255_10:59239570-59239880	+	311	10	59955840	60027371	-	111	ENSG00000151151	715961	0.347373	10	54626366	59734761	hmar
1011	10	59441676	59441968	AluSx_dup2993_10:59441676-59441968	-	293	10	59955840	60027371	-	111	ENSG00000151151	-513873	1	10	54626366	59734761	hmar
1012	10	59908367	59908661	AluY_dup2276_10:59908367-59908661	+	295	10	59955840	60027371	-	111	ENSG00000151151	47180	0.0251572	10	59815517	77153541	no_hmar
1013	10	59923339	59923595	AluY_dup2277_10:59923339-59923595	+	257	10	59955840	60027371	-	111	ENSG00000151151	32246	0.5	10	59815517	77153541	no_hmar
1014	10	60124951	60125067	AluJo_dup1814_10:60124951-60125067	+	117	10	60094962	60128522	+	149	ENSG00000072401	0	0.933333	10	59815517	77153541	no_hmar
1015	10	61307330	61307628	AluSc_dup704_10:61307330-61307628	+	299	10	61412533	61444049	-	130	ENSG00000165449	104906	0.960526	10	59815517	77153541	no_hmar
1016	10	61627317	61627626	AluJb_dup2940_10:61627317-61627626	-	310	10	61552678	61666182	-	1369	ENSG00000108091	0	0.946779	10	59815517	77153541	no_hmar
1017	10	61690083	61690407	AluYf4_dup31_10:61690083-61690407	-	325	10	61552678	61666182	-	1369	ENSG00000108091	23902	0.944444	10	59815517	77153541	no_hmar
1018	10	62086498	62086783	AluY_dup2346_10:62086498-62086783	+	286	10	61802452	62493077	-	370	ENSG00000151150	0	0.467321	10	59815517	77153541	no_hmar
1019	10	62112738	62113048	AluJb_dup2958_10:62112738-62113048	-	311	10	61802452	62493077	-	370	ENSG00000151150	0	0.777778	10	59815517	77153541	no_hmar
1020	10	62920888	62921182	AluY_dup2357_10:62920888-62921182	+	295	10	63170083	63212839	-	0	ENSG00000196932	248902	1	10	59815517	77153541	no_hmar
1021	10	64291073	64291387	AluY_dup2405_10:64291073-64291387	+	315	10	64135953	64430058	+	36	ENSG00000138311	0	0.541667	10	59815517	77153541	no_hmar
1022	10	64843214	64843498	AluSq2_dup1138_10:64843214-64843498	+	285	10	64893176	64913975	+	281	ENSG00000148572	49679	0.666667	10	59815517	77153541	no_hmar
1023	10	65179616	65179907	AluSg_dup807_10:65179616-65179907	+	292	10	64927808	65225422	-	4134	ENSG00000171988	0	0.978261	10	59815517	77153541	no_hmar
1024	10	65180813	65181102	AluSp_dup935_10:65180813-65181102	+	290	10	64927808	65225422	-	4134	ENSG00000171988	0	0.977012	10	59815517	77153541	no_hmar
1025	10	65271190	65271489	AluSg4_dup157_10:65271190-65271489	+	300	10	65281306	65380626	+	373	ENSG00000165476	9818	0.958333	10	59815517	77153541	no_hmar
1026	10	65273391	65273706	AluY_dup2445_10:65273391-65273706	+	316	10	65281306	65380626	+	373	ENSG00000165476	7601	0.980769	10	59815517	77153541	no_hmar
1027	10	65325647	65325942	AluY_dup2449_10:65325647-65325942	-	296	10	65281306	65380626	+	373	ENSG00000165476	0	0.958333	10	59815517	77153541	no_hmar
1028	10	65328026	65328326	AluY_dup2450_10:65328026-65328326	-	301	10	65281306	65380626	+	373	ENSG00000165476	0	1	10	59815517	77153541	no_hmar
1029	10	65358263	65358562	AluY_dup2452_10:65358263-65358562	+	300	10	65281306	65380626	+	373	ENSG00000165476	0	1	10	59815517	77153541	no_hmar
1030	10	65477217	65477532	AluJb_dup3126_10:65477217-65477532	-	316	10	65281306	65380626	+	373	ENSG00000165476	96592	0.170426	10	59815517	77153541	no_hmar
1031	10	65482639	65482945	AluSx1_dup2525_10:65482639-65482945	+	307	10	65281306	65380626	+	373	ENSG00000165476	-102014	0.779762	10	59815517	77153541	no_hmar
1032	10	66170123	66170433	AluSx3_dup596_10:66170123-66170433	+	311	10	65281306	65380626	+	373	ENSG00000165476	-789498	0.973333	10	59815517	77153541	no_hmar
1033	10	67421897	67422200	AluY_dup2514_10:67421897-67422200	-	304	10	67680091	69407271	-	2	ENSG00000183230	-257892	0.34375	10	59815517	77153541	no_hmar
1034	10	67792878	67793191	AluY_dup2528_10:67792878-67793191	-	314	10	67680091	69407271	-	2	ENSG00000183230	0	0.944444	10	59815517	77153541	no_hmar
1035	10	68308738	68309053	AluY_dup2544_10:68308738-68309053	-	316	10	67680091	69407271	-	2	ENSG00000183230	0	0.744445	10	59815517	77153541	no_hmar
1036	10	69562630	69562895	AluJb_dup3217_10:69562630-69562895	-	266	10	69556877	69597769	-	71	ENSG00000108176	0	1	10	59815517	77153541	no_hmar
1037	10	69582479	69582760	AluSx3_dup622_10:69582479-69582760	+	282	10	69556877	69597769	-	71	ENSG00000108176	0	1	10	59815517	77153541	no_hmar
1038	10	69646069	69646333	AluJo_dup1966_10:69646069-69646333	+	265	10	69644480	69676347	+	501	ENSG00000096717	0	0.225	10	59815517	77153541	no_hmar
1039	10	69744345	69744645	AluSz_dup2414_10:69744345-69744645	-	301	10	69682691	69832865	-	662	ENSG00000148634	0	0.935606	10	59815517	77153541	no_hmar
1040	10	70412440	70412705	AluJb_dup3335_10:70412440-70412705	-	266	10	70332096	70451568	+	297	ENSG00000138336	0	1	10	59815517	77153541	no_hmar
1041	10	70470079	70470395	AluY_dup2689_10:70470079-70470395	-	317	10	70481294	70551020	+	2785	ENSG00000060339	-10900	0.99177	10	59815517	77153541	no_hmar
1042	10	70477812	70478166	AluY_dup2692_10:70477812-70478166	+	355	10	70481294	70551020	+	2785	ENSG00000060339	3129	0.666667	10	59815517	77153541	no_hmar
1043	10	70478683	70478993	AluY_dup2693_10:70478683-70478993	+	311	10	70481294	70551020	+	2785	ENSG00000060339	2302	0.978877	10	59815517	77153541	no_hmar
1044	10	70517630	70517797	AluY_dup2699_10:70517630-70517797	-	168	10	70481294	70551020	+	2785	ENSG00000060339	0	0.666667	10	59815517	77153541	no_hmar
1045	10	70537465	70537695	AluJb_dup3362_10:70537465-70537695	+	231	10	70481294	70551020	+	2785	ENSG00000060339	0	0.975319	10	59815517	77153541	no_hmar
1046	10	70633014	70633316	AluY_dup2720_10:70633014-70633316	-	303	10	70587381	70652489	+	198	ENSG00000165730	0	0.866667	10	59815517	77153541	no_hmar
1047	10	70807590	70807876	AluSq2_dup1297_10:70807590-70807876	-	287	10	70748589	70776169	+	693	ENSG00000198954	31422	0.976559	10	59815517	77153541	no_hmar
1048	10	70861533	70861816	AluJb_dup3445_10:70861533-70861816	+	284	10	70847914	70863873	+	0	ENSG00000122862	0	0.601493	10	59815517	77153541	no_hmar
1049	10	70882622	70882815	AluSz6_dup1147_10:70882622-70882815	-	194	10	70884034	70931022	+	524	ENSG00000122958	-1220	0.958333	10	59815517	77153541	no_hmar
1050	10	70938985	70939277	AluSx_dup3516_10:70938985-70939277	-	293	10	70940048	70968788	+	763	ENSG00000156502	-772	0.0251602	10	59815517	77153541	no_hmar
1051	10	70945253	70945555	AluY_dup2747_10:70945253-70945555	-	303	10	70940048	70968788	+	763	ENSG00000156502	0	0.416666	10	59815517	77153541	no_hmar
1052	10	70981398	70981695	AluJb_dup3463_10:70981398-70981695	+	298	10	70980192	71026510	+	55	ENSG00000156510	0	0.966028	10	59815517	77153541	no_hmar
1053	10	72015821	72016127	AluJb_dup3559_10:72015821-72016127	-	307	10	72014716	72043432	-	0	ENSG00000148734	0	0.801557	10	59815517	77153541	no_hmar
1054	10	72125545	72125855	AluY_dup2788_10:72125545-72125855	+	311	10	72061113	72136289	-	50	ENSG00000172731	0	1	10	59815517	77153541	no_hmar
1055	10	72138261	72138552	AluSq2_dup1335_10:72138261-72138552	+	292	10	72061113	72136289	-	50	ENSG00000172731	-1973	1	10	59815517	77153541	no_hmar
1056	10	72180541	72180850	AluY_dup2795_10:72180541-72180850	-	310	10	72164158	72181500	+	265	ENSG00000148730	0	0.594203	10	59815517	77153541	no_hmar
1057	10	72439876	72440187	AluSq_dup543_10:72439876-72440187	+	312	10	72432559	72520606	+	178	ENSG00000138316	0	0.952175	10	59815517	77153541	no_hmar
1058	10	72751502	72751798	AluSz6_dup1186_10:72751502-72751798	-	297	10	72643710	72648290	-	209	ENSG00000166228	103213	0.966667	10	59815517	77153541	no_hmar
1059	10	72865074	72865364	AluSc5_dup195_10:72865074-72865364	+	291	10	72972743	73059031	+	358	ENSG00000107731	107380	0.764286	10	59815517	77153541	no_hmar
1060	10	73078130	73078440	AluSx_dup3631_10:73078130-73078440	-	311	10	73079067	73122362	+	45	ENSG00000198246	-628	0.834615	10	59815517	77153541	no_hmar
1061	10	73402149	73402456	AluSz_dup2642_10:73402149-73402456	-	308	10	73199589	73575032	+	14	ENSG00000107736	0	0.944444	10	59815517	77153541	no_hmar
1062	10	73609185	73609400	AluSp_dup1123_10:73609185-73609400	+	216	10	73576138	73610978	-	2504	ENSG00000197746	0	0.969298	10	59815517	77153541	no_hmar
1063	10	73653615	73653763	AluJb_dup3657_10:73653615-73653763	+	149	10	73576138	73610978	-	2504	ENSG00000197746	-42638	0.6	10	59815517	77153541	no_hmar
1064	10	74312302	74312611	AluSq2_dup1400_10:74312302-74312611	-	310	10	74127956	74326551	-	361	ENSG00000107745	0	0.985507	10	59815517	77153541	no_hmar
1065	10	74458284	74458562	AluSx_dup3779_10:74458284-74458562	-	279	10	74451910	74645577	+	231	ENSG00000156026	0	0.333333	10	59815517	77153541	no_hmar
1066	10	75175306	75175601	AluSz6_dup1252_10:75175306-75175601	-	296	10	75184314	75188042	-	40	ENSG00000166343	-8714	0.25	10	59815517	77153541	no_hmar
1067	10	75394668	75394981	AluSp_dup1204_10:75394668-75394981	-	314	10	75391691	75399775	-	11	ENSG00000177791	0	0.626499	10	59815517	77153541	no_hmar
1068	10	75668335	75668634	AluY_dup2997_10:75668335-75668634	+	300	10	75671314	75676320	+	315	ENSG00000122861	2681	0.777778	10	59815517	77153541	no_hmar
1069	10	75735934	75736243	AluY_dup3001_10:75735934-75736243	-	310	10	75757966	75877924	+	2889	ENSG00000035403	-21724	0.944445	10	59815517	77153541	no_hmar
1070	10	75945309	75945623	AluY_dup3018_10:75945309-75945623	+	315	10	75911037	76468200	+	549	ENSG00000156110	0	0.777778	10	59815517	77153541	no_hmar
1071	10	76409896	76410177	AluSx1_dup3158_10:76409896-76410177	+	282	10	75911037	76468200	+	549	ENSG00000156110	0	0.444444	10	59815517	77153541	no_hmar
1072	10	76564264	76564578	AluSx1_dup3177_10:76564264-76564578	+	315	10	76602616	76790801	+	949	ENSG00000156650	38039	0.921923	10	59815517	77153541	no_hmar
1073	10	76704287	76704591	AluY_dup3050_10:76704287-76704591	+	305	10	76602616	76790801	+	949	ENSG00000156650	0	0.714285	10	59815517	77153541	no_hmar
1074	10	76723600	76723913	AluSq2_dup1517_10:76723600-76723913	+	314	10	76602616	76790801	+	949	ENSG00000156650	0	0.983333	10	59815517	77153541	no_hmar
1075	10	76745524	76745837	AluSc_dup959_10:76745524-76745837	+	314	10	76602616	76790801	+	949	ENSG00000156650	0	1	10	59815517	77153541	no_hmar
1076	10	77149650	77149938	AluY_dup3076_10:77149650-77149938	-	289	10	77158510	77161177	-	109	ENSG00000165655	-8573	0.950617	10	59815517	77153541	no_hmar
1077	10	77837757	77838066	AluY_dup3090_10:77837757-77838066	-	310	10	77191483	78317043	+	20	ENSG00000148655	0	0.918699	10	77245428	78653422	hmar
1078	10	77974089	77974401	AluYb8_dup64_10:77974089-77974401	-	313	10	77191483	78317043	+	20	ENSG00000148655	0	0.65	10	77245428	78653422	hmar
1079	10	78447516	78447843	AluY_dup3105_10:78447516-78447843	-	328	10	77191483	78317043	+	20	ENSG00000148655	130474	0.620425	10	77245428	78653422	hmar
1080	10	79820638	79820943	AluY_dup3150_10:79820638-79820943	-	306	10	79793660	79814765	+	3311	ENSG00000138326	5874	0.361111	10	78683111	82431175	no_hmar
1081	10	81639010	81639323	AluSx3_dup782_10:81639010-81639323	+	314	10	81601497	81610359	+	5	ENSG00000228570	-28652	1	10	78683111	82431175	no_hmar
1082	10	81653467	81653726	AluY_dup3196_10:81653467-81653726	+	260	10	81601497	81610359	+	5	ENSG00000228570	-43109	0.914773	10	78683111	82431175	no_hmar
1083	10	81894759	81895077	AluY_dup3214_10:81894759-81895077	-	319	10	81892519	81904754	+	12	ENSG00000189129	0	0.905172	10	78683111	82431175	no_hmar
1084	10	81966590	81966894	AluSx1_dup3349_10:81966590-81966894	-	305	10	81915612	81932617	-	1523	ENSG00000122359	33974	0.0192308	10	78683111	82431175	no_hmar
1085	10	82281985	82282285	AluSz_dup3078_10:82281985-82282285	+	301	10	82248990	82280601	+	291	ENSG00000108219	-1385	1	10	78683111	82431175	no_hmar
1086	10	82873528	82873830	AluY_dup3274_10:82873528-82873830	-	303	10	82298088	82403838	+	7	ENSG00000178217	469691	0.733333	10	82545286	85995976	hmar
1087	10	84305540	84305823	AluY_dup3318_10:84305540-84305823	-	284	10	83635097	84745358	+	0	ENSG00000185737	0	0.9	10	82545286	85995976	hmar
1088	10	85441541	85441852	AluY_dup3353_10:85441541-85441852	-	312	10	85901257	85912101	+	1246	ENSG00000165678	-459406	0.466667	10	82545286	85995976	hmar
1089	10	86649712	86650028	AluYf4_dup40_10:86649712-86650028	+	317	10	86130809	86274020	+	679	ENSG00000107771	-375693	0.25	10	86327983	87581198	hmar
1090	10	87583936	87584268	AluSz_dup3156_10:87583936-87584268	-	333	10	87362033	88126149	-	91	ENSG00000182771	0	0.984375	10	87584061	100316894	no_hmar
1091	10	88473007	88473301	AluSq2_dup1687_10:88473007-88473301	-	295	10	88428449	88492730	+	6	ENSG00000122367	0	0.966283	10	87584061	100316894	no_hmar
1092	10	88653265	88653565	AluY_dup3471_10:88653265-88653565	+	301	10	88635776	88683473	+	455	ENSG00000107779	0	1	10	87584061	100316894	no_hmar
1093	10	88699775	88700066	AluSq_dup676_10:88699775-88700066	-	292	10	88696503	88717298	-	64	ENSG00000173269	0	0.868421	10	87584061	100316894	no_hmar
1094	10	88811966	88812270	AluSx1_dup3523_10:88811966-88812270	+	305	10	88811511	88854526	-	1397	ENSG00000148672	0	0.420875	10	87584061	100316894	no_hmar
1095	10	89109333	89109632	AluYg6_dup31_10:89109333-89109632	+	300	10	89118023	89127126	+	17	ENSG00000214562	8392	0.97687	10	87584061	100316894	no_hmar
1096	10	89496013	89496322	AluSg4_dup219_10:89496013-89496322	-	310	10	89419739	89505724	+	203	ENSG00000198682	0	0.571429	10	87584061	100316894	no_hmar
1097	10	89572029	89572311	AluSz_dup3252_10:89572029-89572311	-	283	10	89514447	89574356	-	633	ENSG00000138138	0	0.981818	10	87584061	100316894	no_hmar
1098	10	89656805	89657098	AluSx1_dup3546_10:89656805-89657098	-	294	10	89624227	89725226	+	733	ENSG00000171862	0	0.611111	10	87584061	100316894	no_hmar
1099	10	90921266	90921507	AluYc_dup265_10:90921266-90921507	-	242	10	90966234	90967049	-	0	ENSG00000138135	-44728	0.824167	10	87584061	100316894	no_hmar
1100	10	91094241	91094547	AluSq4_dup37_10:91094241-91094547	-	307	10	90974588	91172608	-	143	ENSG00000107798	0	1	10	87584061	100316894	no_hmar
1101	10	91140193	91140483	AluJb_dup4576_10:91140193-91140483	-	291	10	90974588	91172608	-	143	ENSG00000107798	0	0.929646	10	87584061	100316894	no_hmar
1102	10	91249078	91249393	AluJb_dup4582_10:91249078-91249393	-	316	10	91192824	91222335	-	2	ENSG00000152779	26744	0.954545	10	87584061	100316894	no_hmar
1103	10	91290171	91290474	AluY_dup3549_10:91290171-91290474	-	304	10	91344166	91405059	-	66	ENSG00000152782	-53693	0.990741	10	87584061	100316894	no_hmar
1104	10	91330995	91331292	AluSx_dup4571_10:91330995-91331292	-	298	10	91344166	91405059	-	66	ENSG00000152782	-12875	0.931624	10	87584061	100316894	no_hmar
1105	10	91396105	91396212	AluYf4_dup41_10:91396105-91396212	-	108	10	91344166	91405059	-	66	ENSG00000152782	0	0.625	10	87584061	100316894	no_hmar
1106	10	91971541	91971846	AluY_dup3568_10:91971541-91971846	-	306	10	91465052	91533802	+	1480	ENSG00000138182	437740	0.866667	10	87584061	100316894	no_hmar
1107	10	93236656	93236959	AluYb8_dup79_10:93236656-93236959	+	304	10	93170196	93272138	+	90	ENSG00000165338	0	0.9	10	87584061	100316894	no_hmar
1108	10	93554254	93554561	AluSx1_dup3617_10:93554254-93554561	+	308	10	93558448	93622753	+	803	ENSG00000107854	3888	0.333333	10	87584061	100316894	no_hmar
1109	10	93595035	93595345	AluSx3_dup870_10:93595035-93595345	-	311	10	93558448	93622753	+	803	ENSG00000107854	0	0.660494	10	87584061	100316894	no_hmar
1110	10	93642827	93643052	AluJr_dup3110_10:93642827-93643052	+	226	10	93558448	93622753	+	803	ENSG00000107854	-20075	0.95584	10	87584061	100316894	no_hmar
1111	10	93682611	93682904	AluSz6_dup1529_10:93682611-93682904	+	294	10	93683834	93788687	+	1808	ENSG00000095564	931	0.931942	10	87584061	100316894	no_hmar
1112	10	93953547	93953852	AluY_dup3630_10:93953547-93953852	-	306	10	93811972	94000107	-	85	ENSG00000107864	0	1	10	87584061	100316894	no_hmar
1113	10	94275318	94275616	AluSp_dup1496_10:94275318-94275616	-	299	10	94214204	94333776	-	1427	ENSG00000119912	0	1	10	87584061	100316894	no_hmar
1114	10	94355752	94356059	AluY_dup3656_10:94355752-94356059	-	308	10	94353133	94413550	+	1135	ENSG00000138160	0	0.967239	10	87584061	100316894	no_hmar
1115	10	94531002	94531306	AluJb_dup4728_10:94531002-94531306	-	305	10	94591078	94818109	+	293	ENSG00000138190	-59773	0.95	10	87584061	100316894	no_hmar
1116	10	94592043	94592334	AluSq2_dup1806_10:94592043-94592334	-	292	10	94591078	94818109	+	293	ENSG00000138190	0	0.861111	10	87584061	100316894	no_hmar
1117	10	94931258	94931568	AluJb_dup4757_10:94931258-94931568	+	311	10	94833692	94837058	+	0	ENSG00000095596	-94201	0.574786	10	87584061	100316894	no_hmar
1118	10	94939629	94939912	AluSx_dup4773_10:94939629-94939912	+	284	10	94833692	94837058	+	0	ENSG00000095596	-102572	0.990741	10	87584061	100316894	no_hmar
1119	10	94967920	94968234	AluSp_dup1529_10:94967920-94968234	-	315	10	95066723	95241951	-	6652	ENSG00000138119	-98490	0.972222	10	87584061	100316894	no_hmar
1120	10	95063699	95063995	AluSx1_dup3755_10:95063699-95063995	+	297	10	95066723	95241951	-	6652	ENSG00000138119	2729	0.333334	10	87584061	100316894	no_hmar
1121	10	95183002	95183309	AluSx1_dup3764_10:95183002-95183309	+	308	10	95066723	95241951	-	6652	ENSG00000138119	0	0.383428	10	87584061	100316894	no_hmar
1122	10	95549368	95549649	AluSx1_dup3794_10:95549368-95549649	+	282	10	95517902	95557557	+	0	ENSG00000108231	0	0.912281	10	87584061	100316894	no_hmar
1123	10	95630947	95631254	AluY_dup3704_10:95630947-95631254	-	308	10	95653791	95661244	+	45	ENSG00000176273	-22538	0.973958	10	87584061	100316894	no_hmar
1124	10	96177502	96177810	AluY_dup3730_10:96177502-96177810	-	309	10	96162371	96292850	+	163	ENSG00000108239	0	0.611438	10	87584061	100316894	no_hmar
1125	10	96532540	96532837	AluYb8_dup86_10:96532540-96532837	-	298	10	96522463	96612668	+	6	ENSG00000165841	0	0.8	10	87584061	100316894	no_hmar
1126	10	97307208	97307496	AluSq2_dup1868_10:97307208-97307496	+	289	10	97366522	97413134	-	1202	ENSG00000059573	59027	0.944444	10	87584061	100316894	no_hmar
1127	10	98446775	98447042	AluYk4_dup71_10:98446775-98447042	+	268	10	98355337	98480151	-	136	ENSG00000155629	0	0.921432	10	87584061	100316894	no_hmar
1128	10	98636449	98636751	AluSq_dup756_10:98636449-98636751	-	303	10	98708815	98718172	+	700	ENSG00000196233	-72065	0.968992	10	87584061	100316894	no_hmar
1129	10	99071517	99071808	AluJb_dup5060_10:99071517-99071808	+	292	10	99079211	99080047	+	2	ENSG00000165879	7404	1	10	87584061	100316894	no_hmar
1130	10	99184844	99185134	AluSx1_dup3961_10:99184844-99185134	+	291	10	99179231	99185802	-	8	ENSG00000224474	0	0.929778	10	87584061	100316894	no_hmar
1131	10	99351617	99351814	AluSx_dup5048_10:99351617-99351814	-	198	10	99344461	99371413	+	11	ENSG00000241935	0	0.466667	10	87584061	100316894	no_hmar
1132	10	99448902	99449208	AluSc_dup1191_10:99448902-99449208	-	307	10	99437629	99439662	-	83	ENSG00000119986	9241	0.972081	10	87584061	100316894	no_hmar
1133	10	99650412	99650722	AluSp_dup1644_10:99650412-99650722	-	311	10	99625308	99790229	-	0	ENSG00000095713	0	0.416667	10	87584061	100316894	no_hmar
1134	10	99896686	99896979	AluSc_dup1196_10:99896686-99896979	+	294	10	99923152	100003912	+	227	ENSG00000166024	26174	0.281481	10	87584061	100316894	no_hmar
1135	10	100397921	100398230	AluY_dup3902_10:100397921-100398230	+	310	10	100219334	100995559	-	2	ENSG00000172987	0	0.833333	10	100322396	101104013	hmar
1136	10	101188811	101189104	AluSc8_dup723_10:101188811-101189104	-	294	10	101157307	101190322	-	1076	ENSG00000120053	0	0.954861	10	101107201	106037134	no_hmar
1137	10	101527555	101527725	AluSx_dup5148_10:101527555-101527725	+	171	10	101492106	101515493	+	236	ENSG00000119929	-12063	0.481481	10	101107201	106037134	no_hmar
1138	10	101877290	101877545	AluJb_dup5282_10:101877290-101877545	+	256	10	101911891	101945383	-	831	ENSG00000107566	34347	0.0833333	10	101107201	106037134	no_hmar
1139	10	102131676	102132003	AluSq2_dup1996_10:102131676-102132003	-	328	10	102107262	102120687	+	3122	ENSG00000099194	10990	0.952381	10	101107201	106037134	no_hmar
1140	10	102151961	102152271	AluSg7_dup307_10:102151961-102152271	+	311	10	102107262	102120687	+	3122	ENSG00000099194	-31275	0.97619	10	101107201	106037134	no_hmar
1141	10	102402901	102403201	AluSz_dup3774_10:102402901-102403201	-	301	10	102295716	102307891	+	482	ENSG00000166135	95011	0.865097	10	101107201	106037134	no_hmar
1142	10	102708362	102708650	AluY_dup4003_10:102708362-102708650	+	289	10	102672868	102721666	+	1870	ENSG00000119906	0	0.975	10	101107201	106037134	no_hmar
1143	10	103107507	103107811	AluYf5_dup5_10:103107507-103107811	-	305	10	103113938	103310614	+	461	ENSG00000166167	-6128	0.222222	10	101107201	106037134	no_hmar
1144	10	103242143	103242451	AluY_dup4040_10:103242143-103242451	-	309	10	103113938	103310614	+	461	ENSG00000166167	0	1	10	101107201	106037134	no_hmar
1145	10	103478999	103479318	AluSz_dup3825_10:103478999-103479318	-	320	10	103371051	103454397	-	159	ENSG00000107829	24603	0.833333	10	101107201	106037134	no_hmar
1146	10	103480078	103480367	AluSx3_dup1019_10:103480078-103480367	-	290	10	103371051	103454397	-	159	ENSG00000107829	25682	0.974601	10	101107201	106037134	no_hmar
1147	10	103525879	103526045	AluSz6_dup1806_10:103525879-103526045	+	167	10	103530089	103535657	-	3	ENSG00000107831	4045	0.444445	10	101107201	106037134	no_hmar
1148	10	103575748	103576049	AluSx3_dup1023_10:103575748-103576049	+	302	10	103546211	103577779	-	2076	ENSG00000198408	0	0.92735	10	101107201	106037134	no_hmar
1149	10	103655033	103655335	AluY_dup4069_10:103655033-103655335	-	303	10	103607288	103799871	-	412	ENSG00000120029	0	0.558494	10	101107201	106037134	no_hmar
1150	10	103977884	103978194	AluSz_dup3863_10:103977884-103978194	-	311	10	103986306	103989006	+	11	ENSG00000119915	-8113	0.981395	10	101107201	106037134	no_hmar
1151	10	104163825	104164124	AluY_dup4149_10:104163825-104164124	+	300	10	104162960	104176795	-	57	ENSG00000059915	0	0.666667	10	101107201	106037134	no_hmar
1152	10	104227412	104227712	AluSq_dup816_10:104227412-104227712	-	301	10	104228787	104235738	+	187	ENSG00000138111	-1076	0.736923	10	101107201	106037134	no_hmar
1153	10	104431914	104432219	AluY_dup4182_10:104431914-104432219	+	306	10	104436654	104474032	-	407	ENSG00000138175	4436	0.975535	10	101107201	106037134	no_hmar
1154	10	104460547	104460792	AluSp_dup1777_10:104460547-104460792	-	246	10	104436654	104474032	-	407	ENSG00000138175	0	0.977777	10	101107201	106037134	no_hmar
1155	10	104465928	104466216	AluSc8_dup776_10:104465928-104466216	+	289	10	104436654	104474032	-	407	ENSG00000138175	0	0.444444	10	101107201	106037134	no_hmar
1156	10	104471227	104471539	AluY_dup4189_10:104471227-104471539	+	313	10	104436654	104474032	-	407	ENSG00000138175	0	0.677083	10	101107201	106037134	no_hmar
1157	10	104608768	104609053	AluSx_dup5519_10:104608768-104609053	-	286	10	104614044	104622678	+	57	ENSG00000166275	-4992	0.474748	10	101107201	106037134	no_hmar
1158	10	104933093	104933391	AluY_dup4227_10:104933093-104933391	+	299	10	104849432	104934715	-	858	ENSG00000076685	0	1	10	101107201	106037134	no_hmar
1159	10	105088503	105088800	AluSc8_dup789_10:105088503-105088800	-	298	10	105063665	105110823	-	219	ENSG00000156374	0	0.96	10	101107201	106037134	no_hmar
1160	10	105128740	105129035	AluSx1_dup4324_10:105128740-105129035	-	296	10	105127747	105147977	+	277	ENSG00000148835	0	0.615385	10	101107201	106037134	no_hmar
1161	10	105157204	105157490	AluSx_dup5610_10:105157204-105157490	-	287	10	105158184	105205303	+	3316	ENSG00000148843	-695	0.558371	10	101107201	106037134	no_hmar
1162	10	105181440	105181760	AluYb8_dup98_10:105181440-105181760	+	321	10	105158184	105205303	+	3316	ENSG00000148843	0	0.974095	10	101107201	106037134	no_hmar
1163	10	105537806	105538100	AluY_dup4268_10:105537806-105538100	+	295	10	105348484	105615024	-	217	ENSG00000107957	0	0.687136	10	101107201	106037134	no_hmar
1164	10	105725895	105726196	AluY_dup4274_10:105725895-105726196	+	302	10	105727504	105785475	+	2599	ENSG00000065613	1309	0.25	10	101107201	106037134	no_hmar
1165	10	105949644	105949922	AluY_dup4283_10:105949644-105949922	+	279	10	105889900	105992004	-	136	ENSG00000197748	0	0.6875	10	101107201	106037134	no_hmar
1166	10	107014665	107014969	AluYf4_dup52_10:107014665-107014969	+	305	10	106401086	107023129	+	0	ENSG00000156395	0	0.898026	10	106098759	111614162	hmar
1167	10	107711297	107711627	AluY_dup4317_10:107711297-107711627	+	331	10	108336982	108924284	-	0	ENSG00000108018	625356	0.541666	10	106098759	111614162	hmar
1168	10	108050573	108050897	AluY_dup4324_10:108050573-108050897	-	325	10	108336982	108924284	-	0	ENSG00000108018	-286086	0.826667	10	106098759	111614162	hmar
1169	10	108348338	108348648	AluY_dup4337_10:108348338-108348648	+	311	10	108336982	108924284	-	0	ENSG00000108018	0	0.222222	10	106098759	111614162	hmar
1170	10	109869883	109870177	AluY_dup4434_10:109869883-109870177	-	295	10	108336982	108924284	-	0	ENSG00000108018	945600	0.535575	10	106098759	111614162	hmar
1171	10	110768802	110769100	AluY_dup4456_10:110768802-110769100	+	299	10	111624945	111683191	-	605	ENSG00000108039	855846	0.625	10	106098759	111614162	hmar
1172	10	111040766	111041052	AluSq2_dup2191_10:111040766-111041052	+	287	10	111624945	111683191	-	605	ENSG00000108039	583894	0.888889	10	106098759	111614162	hmar
1173	10	112545179	112545333	AluSx3_dup1117_10:112545179-112545333	+	155	10	112404213	112595733	+	147	ENSG00000203867	0	0.974359	10	111668953	113016046	no_hmar
1174	10	112799947	112800233	AluY_dup4545_10:112799947-112800233	+	287	10	112724117	112771573	+	721	ENSG00000108061	-28375	0.873923	10	111668953	113016046	no_hmar
1175	10	113440789	113441097	AluSg_dup1616_10:113440789-113441097	-	309	10	113913311	113941542	-	425	ENSG00000119927	-472215	0.333333	10	113017029	113812933	hmar
1176	10	114122623	114122841	AluSz_dup4152_10:114122623-114122841	-	219	10	114136068	114187113	+	1270	ENSG00000197142	-13228	0.5	10	113883047	116816746	no_hmar
1177	10	114332316	114332622	AluY_dup4590_10:114332316-114332622	+	307	10	114207132	114575139	+	617	ENSG00000151532	0	0.97973	10	113883047	116816746	no_hmar
1178	10	114353663	114353965	AluY_dup4593_10:114353663-114353965	-	303	10	114207132	114575139	+	617	ENSG00000151532	0	0.982759	10	113883047	116816746	no_hmar
1179	10	115796273	115796580	AluY_dup4638_10:115796273-115796580	-	308	10	115803892	115805322	+	19	ENSG00000043591	-7313	0.875	10	113883047	116816746	no_hmar
1180	10	116366828	116367118	AluSc_dup1423_10:116366828-116367118	-	291	10	116196022	116444112	-	1786	ENSG00000099204	0	0.964912	10	113883047	116816746	no_hmar
1181	10	116765465	116765765	AluJb_dup6092_10:116765465-116765765	-	301	10	116698013	116735135	+	699	ENSG00000165832	30331	0.929091	10	113883047	116816746	no_hmar
1182	10	116787643	116787937	AluSx_dup5997_10:116787643-116787937	-	295	10	116698013	116735135	+	699	ENSG00000165832	52509	0.984615	10	113883047	116816746	no_hmar
1183	10	116815660	116815954	AluSz_dup4288_10:116815660-116815954	-	295	10	116853304	117704287	+	15	ENSG00000107518	-37351	0.94086	10	113883047	116816746	no_hmar
1184	10	117056872	117057180	AluY_dup4681_10:117056872-117057180	+	309	10	116853304	117704287	+	15	ENSG00000107518	0	0.602397	10	116820337	118288118	hmar
1185	10	117162966	117163261	AluSz6_dup2005_10:117162966-117163261	-	296	10	116853304	117704287	+	15	ENSG00000107518	0	0.760417	10	116820337	118288118	hmar
1186	10	118465405	118465705	AluY_dup4748_10:118465405-118465705	-	301	10	118434295	118501980	-	7	ENSG00000165868	0	0.663793	10	118303414	121888215	no_hmar
1187	10	118780602	118780918	AluSx_dup6047_10:118780602-118780918	+	317	10	118643745	118764590	-	1762	ENSG00000187164	-16013	0.365215	10	118303414	121888215	no_hmar
1188	10	118863042	118863346	AluY_dup4775_10:118863042-118863346	-	305	10	118891723	118897567	-	0	ENSG00000148704	-28378	0.416667	10	118303414	121888215	no_hmar
1189	10	119151790	119152072	AluSx1_dup4714_10:119151790-119152072	-	283	10	119042782	119134738	-	2833	ENSG00000165650	17053	1	10	118303414	121888215	no_hmar
1190	10	120478076	120478384	AluY_dup4825_10:120478076-120478384	-	309	10	120445643	120514274	-	1304	ENSG00000151893	0	0.945034	10	118303414	121888215	no_hmar
1191	10	120824217	120824517	AluSx_dup6139_10:120824217-120824517	-	301	10	120795554	120840188	-	10620	ENSG00000107581	0	0.92409	10	118303414	121888215	no_hmar
1192	10	120826818	120827119	AluJr_dup3849_10:120826818-120827119	+	302	10	120795554	120840188	-	10620	ENSG00000107581	0	0.555556	10	118303414	121888215	no_hmar
1193	10	120894395	120894705	AluSq_dup934_10:120894395-120894705	+	311	10	120863655	120896156	+	285	ENSG00000119979	0	1	10	118303414	121888215	no_hmar
1194	10	121245168	121245477	AluSx1_dup4790_10:121245168-121245477	-	310	10	121259628	121302150	-	550	ENSG00000148908	-14152	0.222222	10	118303414	121888215	no_hmar
1195	10	121445517	121445820	AluSx_dup6218_10:121445517-121445820	-	304	10	121411188	121436791	+	1399	ENSG00000151929	8727	0.666667	10	118303414	121888215	no_hmar
1196	10	121566501	121566814	AluSx1_dup4831_10:121566501-121566814	+	314	10	121485775	121587289	+	888	ENSG00000198825	0	0.190476	10	118303414	121888215	no_hmar
1197	10	121673382	121673695	AluSq2_dup2395_10:121673382-121673695	+	314	10	121652295	121693276	+	1378	ENSG00000107651	0	0.970573	10	118303414	121888215	no_hmar
1198	10	123086845	123087137	AluSc8_dup914_10:123086845-123087137	+	293	10	123239098	123353331	-	361	ENSG00000066468	151962	0.877193	10	122539248	124311496	no_hmar
1199	10	123318118	123318397	AluSg_dup1732_10:123318118-123318397	-	280	10	123239098	123353331	-	361	ENSG00000066468	0	0.974658	10	122539248	124311496	no_hmar
1200	10	123554481	123554782	AluSz6_dup2122_10:123554481-123554782	+	302	10	123503198	123687946	-	456	ENSG00000107669	0	0.964046	10	122539248	124311496	no_hmar
1201	10	123868256	123868547	AluSx3_dup1224_10:123868256-123868547	-	292	10	123781497	124013770	+	855	ENSG00000138162	0	0.90015	10	122539248	124311496	no_hmar
1202	10	123877517	123877829	AluSx_dup6330_10:123877517-123877829	-	313	10	123781497	124013770	+	855	ENSG00000138162	0	0.978788	10	122539248	124311496	no_hmar
1203	10	123881590	123881895	AluY_dup4999_10:123881590-123881895	+	306	10	123781497	124013770	+	855	ENSG00000138162	0	0.965517	10	122539248	124311496	no_hmar
1204	10	124212692	124212999	AluSc5_dup313_10:124212692-124212999	-	308	10	124214244	124216446	+	0	ENSG00000254636	-1246	0.333333	10	122539248	124311496	no_hmar
1205	10	124820094	124820383	AluSx_dup6362_10:124820094-124820383	+	290	10	124768546	124813278	+	273	ENSG00000196177	-6817	0.5	10	124692910	125313797	no_hmar
1206	10	125041263	125041528	AluSz_dup4568_10:125041263-125041528	+	266	10	124914434	124924580	+	1316	ENSG00000154473	-116684	0.957265	10	124692910	125313797	no_hmar
1207	10	125705882	125706199	AluYb8_dup115_10:125705882-125706199	-	318	10	125472795	125651175	-	0	ENSG00000121898	54708	0.959487	10	125349114	125709604	hmar
1208	10	126088737	126089036	AluSc5_dup315_10:126088737-126089036	+	300	10	126086514	126100740	-	1103	ENSG00000065154	0	1	10	125783452	127687861	no_hmar
1209	10	126256477	126256781	AluSc8_dup941_10:126256477-126256781	-	305	10	126150432	126301926	+	97	ENSG00000107902	0	0.887107	10	125783452	127687861	no_hmar
1210	10	126481074	126481262	AluSx_dup6422_10:126481074-126481262	-	189	10	126450871	126480402	-	36	ENSG00000203791	673	0.5	10	125783452	127687861	no_hmar
1211	10	126499508	126499804	AluY_dup5083_10:126499508-126499804	+	297	10	126490399	126523537	+	436	ENSG00000165660	0	0.984401	10	125783452	127687861	no_hmar
1212	10	126539038	126539203	AluSx_dup6440_10:126539038-126539203	+	166	10	126490399	126523537	+	436	ENSG00000165660	-15502	0.940171	10	125783452	127687861	no_hmar
1213	10	126603249	126603558	AluSq2_dup2503_10:126603249-126603558	-	310	10	126631063	126673558	+	1322	ENSG00000019995	-27506	0.963534	10	125783452	127687861	no_hmar
1214	10	126851992	126852292	AluY_dup5103_10:126851992-126852292	-	301	10	126678090	126727623	-	1171	ENSG00000175029	124370	0.932084	10	125783452	127687861	no_hmar
1215	10	128544291	128544598	AluY_dup5157_10:128544291-128544598	+	308	10	128594087	129249688	+	2599	ENSG00000150760	49490	0.485714	10	127709486	128557532	hmar
1216	10	128601014	128601321	AluY_dup5162_10:128601014-128601321	+	308	10	128594087	129249688	+	2599	ENSG00000150760	0	0.971015	10	128589644	130118118	no_hmar
1217	10	129404091	129404399	AluY_dup5179_10:129404091-129404399	+	309	10	129347633	129350900	+	0	ENSG00000214285	-53192	0.527778	10	128589644	130118118	no_hmar
1218	10	129749079	129749369	AluY_dup5185_10:129749079-129749369	+	291	10	129676416	129691048	-	0	ENSG00000180745	-58032	0.325	10	128589644	130118118	no_hmar
1219	10	129925055	129925354	AluJb_dup6622_10:129925055-129925354	+	300	10	129897457	129923931	-	21894	ENSG00000148773	-1125	0.0454543	10	128589644	130118118	no_hmar
1220	10	131917082	131917393	AluYb8_dup120_10:131917082-131917393	-	312	10	131934685	131977653	+	399	ENSG00000108010	-17293	0.932908	10	131831116	132021575	no_hmar
1221	10	131930927	131931231	AluY_dup5229_10:131930927-131931231	+	305	10	131934685	131977653	+	399	ENSG00000108010	3455	0.713021	10	131831116	132021575	no_hmar
1222	10	131935998	131936299	AluJb_dup6658_10:131935998-131936299	-	302	10	131934685	131977653	+	399	ENSG00000108010	0	0	10	131831116	132021575	no_hmar
1223	10	132097741	132098041	AluY_dup5236_10:132097741-132098041	+	301	10	131934685	131977653	+	399	ENSG00000108010	-120089	0.79057	10	132077959	133441183	hmar
1224	10	134185793	134186088	AluSq2_dup2576_10:134185793-134186088	+	296	10	134147029	134188743	+	43	ENSG00000148814	0	0.226877	10	133449300	135450221	no_hmar
1225	10	134468469	134468554	AluY_dup5294_10:134468469-134468554	+	86	10	134351601	134595611	+	173	ENSG00000068383	0	0.3125	10	133449300	135450221	no_hmar
1226	10	135070514	135070638	AluJb_dup6736_10:135070514-135070638	+	125	10	135076663	135090321	-	19	ENSG00000151651	6026	0.911774	10	133449300	135450221	no_hmar
1227	10	135143710	135143879	AluSx3_dup1295_10:135143710-135143879	+	170	10	135122448	135165941	+	126	ENSG00000198546	0	0.598214	10	133449300	135450221	no_hmar
1228	11	301029	301255	AluSx1_dup21_11:301029-301255	-	227	11	298504	299490	-	0	ENSG00000206013	1540	1	11	162894	4226506	no_hmar
1229	11	358904	359204	AluSx1_dup24_11:358904-359204	+	301	11	369804	381789	+	231	ENSG00000182272	10601	0.791667	11	162894	4226506	no_hmar
1230	11	440810	440917	AluJb_dup36_11:440810-440917	-	108	11	418374	441926	-	182	ENSG00000185101	0	0.875	11	162894	4226506	no_hmar
1231	11	520328	520618	AluSz_dup22_11:520328-520618	-	291	11	532639	534322	-	191	ENSG00000174775	-12022	1	11	162894	4226506	no_hmar
1232	11	603060	603320	AluJb_dup53_11:603060-603320	-	261	11	581513	611774	+	1476	ENSG00000070047	0	0.991177	11	162894	4226506	no_hmar
1233	11	710555	710765	AluJb_dup72_11:710555-710765	+	211	11	709408	726978	+	1309	ENSG00000177106	0	0.658971	11	162894	4226506	no_hmar
1234	11	753250	753561	AluYk4_11:753250-753561	+	312	11	747482	764842	+	1329	ENSG00000177156	0	0.166667	11	162894	4226506	no_hmar
1235	11	810925	811184	AluJb_dup92_11:810925-811184	+	260	11	810235	812833	+	4657	ENSG00000177600	0	0.070959	11	162894	4226506	no_hmar
1236	11	878693	878853	AluSx_dup108_11:878693-878853	-	161	11	869861	914569	-	272	ENSG00000177830	0	0.979247	11	162894	4226506	no_hmar
1237	11	915740	916036	AluY_dup114_11:915740-916036	+	297	11	869861	914569	-	272	ENSG00000177830	-1172	0.842857	11	162894	4226506	no_hmar
1238	11	1305581	1305874	AluY_dup133_11:1305581-1305874	-	294	11	1298272	1330728	-	71	ENSG00000078902	0	0.969697	11	162894	4226506	no_hmar
1239	11	1404888	1405053	AluSx_dup139_11:1404888-1405053	-	166	11	1411515	1482216	+	160	ENSG00000174672	-6463	0.666667	11	162894	4226506	no_hmar
1240	11	1487244	1487484	AluJr_dup40_11:1487244-1487484	+	241	11	1491405	1507786	-	80	ENSG00000182208	3922	0.877193	11	162894	4226506	no_hmar
1241	11	1680434	1680746	AluY_dup158_11:1680434-1680746	+	313	11	1651071	1651781	+	0	ENSG00000185940	-28654	0.865385	11	162894	4226506	no_hmar
1242	11	1746619	1746915	AluY_dup165_11:1746619-1746915	+	297	11	1756513	1771672	-	1	ENSG00000244242	9599	0.222222	11	162894	4226506	no_hmar
1243	11	3053322	3053600	AluSx_dup206_11:3053322-3053600	-	279	11	3022347	3078597	-	2432	ENSG00000110619	0	0.666667	11	162894	4226506	no_hmar
1244	11	3076396	3076670	AluYc_dup11_11:3076396-3076670	-	275	11	3022347	3078597	-	2432	ENSG00000110619	0	0.88697	11	162894	4226506	no_hmar
1245	11	3163134	3163448	AluSx1_dup164_11:3163134-3163448	-	315	11	3109438	3150378	-	402	ENSG00000021762	12757	0.96875	11	162894	4226506	no_hmar
1246	11	3550485	3550794	AluY_dup224_11:3550485-3550794	+	310	11	3659971	3663092	-	4	ENSG00000167311	109178	0.933333	11	162894	4226506	no_hmar
1247	11	3827978	3828280	AluSx_dup272_11:3827978-3828280	+	303	11	3819074	3846685	+	97	ENSG00000148985	0	0.666667	11	162894	4226506	no_hmar
1248	11	3857848	3858161	AluSz_dup153_11:3857848-3858161	+	314	11	3848796	3849368	-	98	ENSG00000177105	-8481	0.981482	11	162894	4226506	no_hmar
1249	11	3902594	3902900	AluY_dup261_11:3902594-3902900	-	307	11	3877501	4113025	+	291	ENSG00000167323	0	0.638889	11	162894	4226506	no_hmar
1250	11	4141954	4142276	AluJb_dup263_11:4141954-4142276	+	323	11	4116243	4159610	+	2342	ENSG00000167325	0	0.99187	11	162894	4226506	no_hmar
1251	11	4494140	4494426	AluYk4_dup3_11:4494140-4494426	+	287	11	4510131	4511072	+	0	ENSG00000196778	15706	0.84053	11	4338136	5156192	hmar
1252	11	5643395	5643702	AluY_dup316_11:5643395-5643702	+	308	11	5618128	5664936	+	0	ENSG00000258659	0	0.595238	11	5169115	5721957	no_hmar
1253	11	5714669	5714976	AluY_dup328_11:5714669-5714976	+	308	11	5717463	5755428	+	35	ENSG00000132274	2488	0.8125	11	5169115	5721957	no_hmar
1254	11	5780662	5780956	AluSx_dup340_11:5780662-5780956	+	295	11	5775971	5776933	+	0	ENSG00000181074	-3730	0.583333	11	5724708	6175732	hmar
1255	11	6496910	6497218	AluY_dup346_11:6496910-6497218	-	309	11	6498346	6501651	-	447	ENSG00000132254	-1129	0.943254	11	6257093	6730846	no_hmar
1256	11	8705259	8705528	AluSx_dup406_11:8705259-8705528	-	270	11	8704361	8707350	+	1546	ENSG00000166441	0	0.0310439	11	8150394	15233740	no_hmar
1257	11	8958017	8958287	AluY_dup431_11:8958017-8958287	-	271	11	8959166	8959708	-	0	ENSG00000176009	-880	0.866667	11	8150394	15233740	no_hmar
1258	11	8973018	8973325	AluY_dup434_11:8973018-8973325	+	308	11	8969870	8985860	-	146	ENSG00000175348	0	0.939922	11	8150394	15233740	no_hmar
1259	11	8986987	8987316	AluY_dup435_11:8986987-8987316	-	330	11	8969870	8985860	-	146	ENSG00000175348	1128	0.924508	11	8150394	15233740	no_hmar
1260	11	8991786	8992052	AluSz_dup248_11:8991786-8992052	+	267	11	8969870	8985860	-	146	ENSG00000175348	-5927	0.675	11	8150394	15233740	no_hmar
1261	11	9284744	9285081	AluSx_dup446_11:9284744-9285081	-	338	11	9161221	9286616	-	1022	ENSG00000184014	0	0.964286	11	8150394	15233740	no_hmar
1262	11	9291914	9292209	AluY_dup456_11:9291914-9292209	-	296	11	9161221	9286616	-	1022	ENSG00000184014	5299	0.972222	11	8150394	15233740	no_hmar
1263	11	9297411	9297720	AluSx_dup451_11:9297411-9297720	-	310	11	9304974	9335988	-	261	ENSG00000166471	-7255	1	11	8150394	15233740	no_hmar
1264	11	9300902	9301185	AluY_dup457_11:9300902-9301185	+	284	11	9304974	9335988	-	261	ENSG00000166471	3790	0.994565	11	8150394	15233740	no_hmar
1265	11	9374003	9374301	AluY_dup473_11:9374003-9374301	+	299	11	9406311	9466738	+	5152	ENSG00000205339	32011	0.666667	11	8150394	15233740	no_hmar
1266	11	9536916	9537230	AluY_dup512_11:9536916-9537230	+	315	11	9492856	9549157	+	421	ENSG00000166478	0	1	11	8150394	15233740	no_hmar
1267	11	9593569	9593881	AluSx_dup530_11:9593569-9593881	+	313	11	9595481	9614836	+	970	ENSG00000166483	1601	0.333333	11	8150394	15233740	no_hmar
1268	11	9960624	9960942	AluSg4_dup27_11:9960624-9960942	-	319	11	9801968	10315616	-	1109	ENSG00000133812	0	0.86715	11	8150394	15233740	no_hmar
1269	11	9991758	9992012	AluY_dup543_11:9991758-9992012	-	255	11	9801968	10315616	-	1109	ENSG00000133812	0	0.785311	11	8150394	15233740	no_hmar
1270	11	10002137	10002411	AluYc_dup29_11:10002137-10002411	-	275	11	9801968	10315616	-	1109	ENSG00000133812	0	0.94913	11	8150394	15233740	no_hmar
1271	11	10637571	10637858	AluY_dup569_11:10637571-10637858	+	288	11	10597882	10715149	-	127	ENSG00000072952	0	0.983262	11	8150394	15233740	no_hmar
1272	11	10803261	10803576	AluSx1_dup439_11:10803261-10803576	-	316	11	10772960	10800649	+	1907	ENSG00000198730	2613	0.974138	11	8150394	15233740	no_hmar
1273	11	11001842	11002134	AluY_dup578_11:11001842-11002134	-	293	11	10874414	10876492	-	238	ENSG00000236287	125351	0.444445	11	8150394	15233740	no_hmar
1274	11	11429631	11429937	AluSx1_dup451_11:11429631-11429937	+	307	11	11292694	11643140	-	255	ENSG00000110328	0	0.958889	11	8150394	15233740	no_hmar
1275	11	11684855	11685117	AluSp_dup240_11:11684855-11685117	+	263	11	11292694	11643140	-	255	ENSG00000110328	-41716	1	11	8150394	15233740	no_hmar
1276	11	11839354	11839650	AluSx1_dup455_11:11839354-11839650	+	297	11	11863733	11977719	+	1103	ENSG00000170242	24084	0.937164	11	8150394	15233740	no_hmar
1277	11	14382186	14382476	AluSz6_dup200_11:14382186-14382476	+	291	11	14300886	14385939	-	34	ENSG00000133818	0	0.975274	11	8150394	15233740	no_hmar
1278	11	14543051	14543335	AluSg_dup171_11:14543051-14543335	+	285	11	14526741	14632532	-	321	ENSG00000129084	0	0.982031	11	8150394	15233740	no_hmar
1279	11	14821785	14822019	AluSg_dup174_11:14821785-14822019	+	235	11	14665622	14891203	+	183	ENSG00000152270	0	0.166667	11	8150394	15233740	no_hmar
1280	11	15568066	15568367	AluY_dup699_11:15568066-15568367	-	302	11	15134016	15267583	+	2	ENSG00000188487	300484	0.305555	11	15316633	16570809	hmar
1281	11	17100334	17100559	AluSx3_dup129_11:17100334-17100559	+	226	11	17095958	17099188	-	1902	ENSG00000110700	-1147	0.388051	11	16573243	20026884	no_hmar
1282	11	17123139	17123449	AluY_dup729_11:17123139-17123449	-	311	11	17111288	17191288	-	1761	ENSG00000011405	0	0.530903	11	16573243	20026884	no_hmar
1283	11	17218126	17218424	AluY_dup739_11:17218126-17218424	-	299	11	17111288	17191288	-	1761	ENSG00000011405	26839	0.5	11	16573243	20026884	no_hmar
1284	11	18338805	18339102	AluSz6_dup263_11:18338805-18339102	-	298	11	18301432	18339405	-	421	ENSG00000110756	0	0.987654	11	16573243	20026884	no_hmar
1285	11	18414957	18415268	AluSz_dup544_11:18414957-18415268	+	312	11	18418095	18428920	+	5282	ENSG00000134333	2828	0.782513	11	16573243	20026884	no_hmar
1286	11	18518099	18518346	AluJb_dup935_11:18518099-18518346	+	248	11	18490754	18548363	-	402	ENSG00000074319	0	0.956688	11	16573243	20026884	no_hmar
1287	11	18605205	18605499	AluSp_dup330_11:18605205-18605499	-	295	11	18553870	18610201	-	140	ENSG00000151116	0	0.910714	11	16573243	20026884	no_hmar
1288	11	18646264	18646558	AluSp_dup334_11:18646264-18646558	+	295	11	18631411	18655804	-	552	ENSG00000179119	0	0.416666	11	16573243	20026884	no_hmar
1289	11	19483398	19483655	AluSx1_dup687_11:19483398-19483655	-	258	11	19372500	20139801	+	197	ENSG00000166833	0	0.233333	11	16573243	20026884	no_hmar
1290	11	19780637	19780927	AluY_dup834_11:19780637-19780927	-	291	11	19372500	20139801	+	197	ENSG00000166833	0	0.432901	11	16573243	20026884	no_hmar
1291	11	20595810	20596091	AluY_dup855_11:20595810-20596091	+	282	11	20621219	20676411	+	0	ENSG00000165970	25129	0.655556	11	20254799	20609821	no_hmar
1292	11	21544376	21544691	AluY_dup879_11:21544376-21544691	-	316	11	20691270	21596565	+	0	ENSG00000165973	0	0.423077	11	20640407	27275650	hmar
1293	11	22173881	22174202	AluY_dup891_11:22173881-22174202	-	322	11	22215039	22301308	+	38	ENSG00000171714	-40838	0.833333	11	20640407	27275650	hmar
1294	11	22623347	22623704	AluSx_dup988_11:22623347-22623704	+	358	11	22646235	22647356	-	38	ENSG00000183161	22532	0.836364	11	20640407	27275650	hmar
1295	11	22856878	22857173	AluY_dup915_11:22856878-22857173	+	296	11	22844668	22851294	-	59	ENSG00000198168	-5585	0.684053	11	20640407	27275650	hmar
1296	11	22885936	22886236	AluSc_dup216_11:22885936-22886236	-	301	11	22869059	22881967	-	0	ENSG00000255359	3970	0.675	11	20640407	27275650	hmar
1297	11	22917887	22918186	AluY_dup916_11:22917887-22918186	+	300	11	22869059	22881967	-	0	ENSG00000255359	-35921	0.982906	11	20640407	27275650	hmar
1298	11	23234824	23235068	AluY_dup927_11:23234824-23235068	+	245	11	22869059	22881967	-	0	ENSG00000255359	-352858	0.454546	11	20640407	27275650	hmar
1299	11	24031812	24032107	AluY_dup945_11:24031812-24032107	+	296	11	24518790	25100201	+	0	ENSG00000187398	486684	0.85	11	20640407	27275650	hmar
1300	11	24704270	24704549	AluSc_dup229_11:24704270-24704549	+	280	11	24518790	25100201	+	0	ENSG00000187398	0	0.6	11	20640407	27275650	hmar
1301	11	24919889	24920187	AluY_dup966_11:24919889-24920187	+	299	11	24518790	25100201	+	0	ENSG00000187398	0	0.7	11	20640407	27275650	hmar
1302	11	25828158	25828452	AluY_dup986_11:25828158-25828452	+	295	11	26353823	26681988	+	0	ENSG00000134343	525372	0.965976	11	20640407	27275650	hmar
1303	11	26287980	26288279	AluSg4_dup52_11:26287980-26288279	-	300	11	26353823	26681988	+	0	ENSG00000134343	-65545	0.953073	11	20640407	27275650	hmar
1304	11	26371085	26371394	AluY_dup1004_11:26371085-26371394	-	310	11	26353823	26681988	+	0	ENSG00000134343	0	0.971591	11	20640407	27275650	hmar
1305	11	26646469	26646770	AluY_dup1011_11:26646469-26646770	-	302	11	26353823	26681988	+	0	ENSG00000134343	0	0.833333	11	20640407	27275650	hmar
1306	11	27084105	27084406	AluSc_dup249_11:27084105-27084406	-	302	11	27076978	27148997	+	0	ENSG00000129151	0	0.391534	11	20640407	27275650	hmar
1307	11	27454756	27455077	AluY_dup1029_11:27454756-27455077	-	322	11	27389417	27493849	-	93	ENSG00000205213	0	0.956834	11	27307993	29665765	no_hmar
1308	11	27856813	27857105	AluSz6_dup346_11:27856813-27857105	-	293	11	27679371	27742961	-	278	ENSG00000176697	113853	0.98264	11	27307993	29665765	no_hmar
1309	11	28994687	28994995	AluSx1_dup829_11:28994687-28994995	-	309	11	28134882	28352385	+	511	ENSG00000169519	642303	1	11	27307993	29665765	no_hmar
1310	11	30424511	30424817	AluY_dup1093_11:30424511-30424817	+	307	11	30410439	30601920	-	0	ENSG00000066382	0	0.806036	11	29748491	31121358	hmar
1311	11	31058972	31059309	AluY_dup1107_11:31058972-31059309	-	338	11	30900134	30953451	-	8	ENSG00000170959	105522	1	11	29748491	31121358	hmar
1312	11	31070119	31070413	AluY_dup1109_11:31070119-31070413	+	295	11	30900134	30953451	-	8	ENSG00000170959	-116669	0.650762	11	29748491	31121358	hmar
1313	11	31350064	31350386	AluY_dup1114_11:31350064-31350386	+	323	11	31284613	31349827	-	29	ENSG00000188682	-238	0.791667	11	31155343	36935826	no_hmar
1314	11	31420957	31421258	AluSg_dup313_11:31420957-31421258	-	302	11	31392296	31451945	+	106	ENSG00000170946	0	0.222222	11	31155343	36935826	no_hmar
1315	11	31511752	31512031	AluSc_dup277_11:31511752-31512031	+	280	11	31531332	31805083	+	223	ENSG00000109911	19302	1	11	31155343	36935826	no_hmar
1316	11	31793661	31793967	AluSx_dup1172_11:31793661-31793967	-	307	11	31531332	31805083	+	223	ENSG00000109911	0	0.973404	11	31155343	36935826	no_hmar
1317	11	32387134	32387413	AluSq_dup181_11:32387134-32387413	+	280	11	32410607	32456891	-	0	ENSG00000184937	23195	0.888889	11	31155343	36935826	no_hmar
1318	11	32452981	32453241	AluSx1_dup892_11:32452981-32453241	-	261	11	32410607	32456891	-	0	ENSG00000184937	0	0.875	11	31155343	36935826	no_hmar
1319	11	32485091	32485404	AluY_dup1152_11:32485091-32485404	-	314	11	32410607	32456891	-	0	ENSG00000184937	28201	0.583333	11	31155343	36935826	no_hmar
1320	11	32559226	32559526	AluY_dup1160_11:32559226-32559526	-	301	11	32605434	32623942	+	2046	ENSG00000149100	-45909	0.986456	11	31155343	36935826	no_hmar
1321	11	32564116	32564411	AluSz_dup797_11:32564116-32564411	+	296	11	32605434	32623942	+	2046	ENSG00000149100	41024	0.96296	11	31155343	36935826	no_hmar
1322	11	32612399	32612694	AluY_dup1164_11:32612399-32612694	-	296	11	32605434	32623942	+	2046	ENSG00000149100	0	0.991379	11	31155343	36935826	no_hmar
1323	11	32711275	32711554	AluY_dup1171_11:32711275-32711554	+	280	11	32624360	32781789	-	13	ENSG00000186714	0	0.66	11	31155343	36935826	no_hmar
1324	11	32974350	32974646	AluSg_dup347_11:32974350-32974646	-	297	11	32949573	33014753	+	2754	ENSG00000060749	0	0.199561	11	31155343	36935826	no_hmar
1325	11	33032198	33032426	AluJb_dup1330_11:33032198-33032426	+	229	11	33037502	33054998	+	193	ENSG00000121690	5077	0.962963	11	31155343	36935826	no_hmar
1326	11	33240430	33240740	AluY_dup1200_11:33240430-33240740	+	311	11	33106636	33182871	-	585	ENSG00000176102	-57560	0.904762	11	31155343	36935826	no_hmar
1327	11	33788837	33789144	AluY_dup1222_11:33788837-33789144	-	308	11	33763457	33796043	-	385	ENSG00000110429	0	0.62963	11	31155343	36935826	no_hmar
1328	11	34242517	34242817	AluSg_dup381_11:34242517-34242817	-	301	11	34173937	34379130	-	235	ENSG00000166016	0	0.962755	11	31155343	36935826	no_hmar
1329	11	35108209	35108347	AluYc_dup96_11:35108209-35108347	+	139	11	35160851	35250877	+	4706	ENSG00000026508	52505	0.542857	11	31155343	36935826	no_hmar
1330	11	37137171	37137349	AluSx_dup1413_11:37137171-37137349	-	179	11	36631654	36692828	+	58	ENSG00000166352	444344	0.956092	11	37025494	43334581	hmar
1331	11	37628602	37628901	AluY_dup1330_11:37628602-37628901	+	300	11	36631654	36692828	+	58	ENSG00000166352	-935775	0.911859	11	37025494	43334581	hmar
1332	11	38056769	38057079	AluY_dup1337_11:38056769-38057079	+	311	11	36631654	36692828	+	58	ENSG00000166352	-1363942	1	11	37025494	43334581	hmar
1333	11	38655864	38656158	AluYf5_dup4_11:38655864-38656158	-	295	11	40135923	40137842	-	0	ENSG00000148948	-1479766	0.976191	11	37025494	43334581	hmar
1334	11	38718482	38718796	AluSg_dup418_11:38718482-38718796	-	315	11	40135923	40137842	-	0	ENSG00000148948	-1417128	0.909889	11	37025494	43334581	hmar
1335	11	38947502	38947754	AluY_dup1363_11:38947502-38947754	+	253	11	40135923	40137842	-	0	ENSG00000148948	1188170	0.5	11	37025494	43334581	hmar
1336	11	39244102	39244398	AluY_dup1389_11:39244102-39244398	-	297	11	40135923	40137842	-	0	ENSG00000148948	-891526	0.993421	11	37025494	43334581	hmar
1337	11	39244903	39245240	AluY_dup1390_11:39244903-39245240	+	338	11	40135923	40137842	-	0	ENSG00000148948	890684	0.95	11	37025494	43334581	hmar
1338	11	39660323	39660619	AluY_dup1439_11:39660323-39660619	-	297	11	40135923	40137842	-	0	ENSG00000148948	-475305	0.972222	11	37025494	43334581	hmar
1339	11	39809223	39809529	AluY_dup1450_11:39809223-39809529	-	307	11	40135923	40137842	-	0	ENSG00000148948	-326395	0.55303	11	37025494	43334581	hmar
1340	11	40039880	40040183	AluY_dup1471_11:40039880-40040183	+	304	11	40135923	40137842	-	0	ENSG00000148948	95741	0.925	11	37025494	43334581	hmar
1341	11	40576284	40576570	AluY_dup1488_11:40576284-40576570	-	287	11	40135923	40137842	-	0	ENSG00000148948	438443	0.888889	11	37025494	43334581	hmar
1342	11	40743219	40743517	AluY_dup1496_11:40743219-40743517	+	299	11	40135923	40137842	-	0	ENSG00000148948	-605378	0.923027	11	37025494	43334581	hmar
1343	11	40966568	40966867	AluY_dup1510_11:40966568-40966867	-	300	11	40135923	40137842	-	0	ENSG00000148948	828727	0.969231	11	37025494	43334581	hmar
1344	11	41170774	41171086	AluYa5_dup52_11:41170774-41171086	+	313	11	40135923	40137842	-	0	ENSG00000148948	-1032933	1	11	37025494	43334581	hmar
1345	11	41681952	41682254	AluSz_dup1022_11:41681952-41682254	-	303	11	40135923	40137842	-	0	ENSG00000148948	1544111	0.988506	11	37025494	43334581	hmar
1346	11	41887741	41887870	AluYa8_dup6_11:41887741-41887870	-	130	11	43333678	43364200	+	1507	ENSG00000166181	-1445809	0.75	11	37025494	43334581	hmar
1347	11	41973729	41974039	AluSq2_dup577_11:41973729-41974039	-	311	11	43333678	43364200	+	1507	ENSG00000166181	-1359640	0.922605	11	37025494	43334581	hmar
1348	11	42190066	42190365	AluY_dup1549_11:42190066-42190365	-	300	11	43333678	43364200	+	1507	ENSG00000166181	-1143314	0.958333	11	37025494	43334581	hmar
1349	11	42372805	42373112	AluY_dup1556_11:42372805-42373112	+	308	11	43333678	43364200	+	1507	ENSG00000166181	960567	0.333333	11	37025494	43334581	hmar
1350	11	42842959	42843269	AluY_dup1574_11:42842959-42843269	-	311	11	43333678	43364200	+	1507	ENSG00000166181	-490410	0.877778	11	37025494	43334581	hmar
1351	11	43619186	43619484	AluSz_dup1053_11:43619186-43619484	-	299	11	43702378	43876795	+	446	ENSG00000149084	-82895	0.444444	11	43383623	48237150	no_hmar
1352	11	43787390	43787674	AluYk4_dup19_11:43787390-43787674	-	285	11	43702378	43876795	+	446	ENSG00000149084	0	0.888889	11	43383623	48237150	no_hmar
1353	11	43953810	43954118	AluSz6_dup514_11:43953810-43954118	-	309	11	43946892	43965356	+	0	ENSG00000187479	0	0.922426	11	43383623	48237150	no_hmar
1354	11	45467031	45467281	AluY_dup1642_11:45467031-45467281	+	251	11	45265606	45307758	-	10	ENSG00000019505	-159274	0.573643	11	43383623	48237150	no_hmar
1355	11	45780629	45780929	AluY_dup1647_11:45780629-45780929	+	301	11	45793136	45793773	+	0	ENSG00000205106	12208	0.414141	11	43383623	48237150	no_hmar
1356	11	45812024	45812298	AluSx1_dup1248_11:45812024-45812298	-	275	11	45827353	45832883	+	134	ENSG00000181830	-15056	0.5	11	43383623	48237150	no_hmar
1357	11	45824929	45825239	AluSx1_dup1249_11:45824929-45825239	+	311	11	45827353	45832883	+	134	ENSG00000181830	2115	0.937879	11	43383623	48237150	no_hmar
1358	11	45862495	45862789	AluY_dup1651_11:45862495-45862789	+	295	11	45868801	45893779	+	100	ENSG00000121671	6013	0.939203	11	43383623	48237150	no_hmar
1359	11	46298500	46298810	AluSq2_dup649_11:46298500-46298810	+	311	11	46299663	46342293	+	6	ENSG00000157613	854	0.35	11	43383623	48237150	no_hmar
1360	11	46319967	46320275	AluSx3_dup340_11:46319967-46320275	+	309	11	46299663	46342293	+	6	ENSG00000157613	0	0.214286	11	43383623	48237150	no_hmar
1361	11	46325745	46326041	AluSp_dup620_11:46325745-46326041	+	297	11	46299663	46342293	+	6	ENSG00000157613	0	0.969231	11	43383623	48237150	no_hmar
1362	11	46616493	46616790	AluJb_dup1846_11:46616493-46616790	+	298	11	46625083	46637787	-	11	ENSG00000180423	8294	0.915379	11	43383623	48237150	no_hmar
1363	11	46616808	46617116	AluSg4_dup93_11:46616808-46617116	+	309	11	46625083	46637787	-	11	ENSG00000180423	7968	0.467593	11	43383623	48237150	no_hmar
1364	11	46640923	46641237	AluSp_dup640_11:46640923-46641237	-	315	11	46625083	46637787	-	11	ENSG00000180423	3137	0.496324	11	43383623	48237150	no_hmar
1365	11	46644563	46644857	AluY_dup1701_11:46644563-46644857	+	295	11	46625083	46637787	-	11	ENSG00000180423	-6777	0.996226	11	43383623	48237150	no_hmar
1366	11	46759554	46759843	AluSg_dup504_11:46759554-46759843	-	290	11	46740786	46760955	+	4	ENSG00000180210	0	0.984453	11	43383623	48237150	no_hmar
1367	11	46909593	46909807	AluSg_dup510_11:46909593-46909807	+	215	11	46880537	46939930	-	253	ENSG00000134569	0	0	11	43383623	48237150	no_hmar
1368	11	47017847	47018117	AluYg6_dup9_11:47017847-47018117	-	271	11	46958357	47185800	+	156	ENSG00000149179	0	0.952381	11	43383623	48237150	no_hmar
1369	11	47277241	47277518	AluSq2_dup693_11:47277241-47277518	-	278	11	47280768	47290244	+	86	ENSG00000025434	-3251	0.729167	11	43383623	48237150	no_hmar
1370	11	47341256	47341563	AluSx1_dup1383_11:47341256-47341563	+	308	11	47295466	47350698	+	1035	ENSG00000110514	0	0.973545	11	43383623	48237150	no_hmar
1371	11	47343877	47344172	AluY_dup1757_11:47343877-47344172	+	296	11	47295466	47350698	+	1035	ENSG00000110514	0	0.666667	11	43383623	48237150	no_hmar
1372	11	47370175	47370458	AluSz_dup1249_11:47370175-47370458	+	284	11	47353425	47374198	-	6	ENSG00000134571	0	0.333333	11	43383623	48237150	no_hmar
1373	11	47444669	47444971	AluY_dup1767_11:47444669-47444971	+	303	11	47440389	47447830	-	1306	ENSG00000165916	0	0.96	11	43383623	48237150	no_hmar
1374	11	47587746	47588060	AluSq2_dup714_11:47587746-47588060	+	315	11	47587175	47593178	+	311	ENSG00000110536	0	0.25	11	43383623	48237150	no_hmar
1375	11	47664644	47664956	AluSg_dup536_11:47664644-47664956	-	313	11	47640388	47664017	-	745	ENSG00000109919	628	0.2	11	43383623	48237150	no_hmar
1376	11	47698090	47698390	AluY_dup1799_11:47698090-47698390	+	301	11	47681728	47736202	-	0	ENSG00000165923	0	0.516667	11	43383623	48237150	no_hmar
1377	11	47742379	47742548	AluSg4_dup102_11:47742379-47742548	+	170	11	47738977	47788840	-	1709	ENSG00000109920	0	0.95	11	43383623	48237150	no_hmar
1378	11	47757827	47758115	AluSg_dup546_11:47757827-47758115	+	289	11	47738977	47788840	-	1709	ENSG00000109920	0	0.916667	11	43383623	48237150	no_hmar
1379	11	47787617	47787884	AluJb_dup2031_11:47787617-47787884	+	268	11	47738977	47788840	-	1709	ENSG00000109920	0	0.0394315	11	43383623	48237150	no_hmar
1380	11	47789305	47789598	AluSg4_dup105_11:47789305-47789598	+	294	11	47738977	47788840	-	1709	ENSG00000109920	-466	0.458333	11	43383623	48237150	no_hmar
1381	11	47875475	47875778	AluSg4_dup106_11:47875475-47875778	-	304	11	47800660	47869972	-	1644	ENSG00000030066	5504	0.555556	11	43383623	48237150	no_hmar
1382	11	48000457	48000735	AluJb_dup2082_11:48000457-48000735	-	279	11	48002465	48188911	+	884	ENSG00000149177	-1731	0.965316	11	43383623	48237150	no_hmar
1383	11	48012238	48012529	AluY_dup1836_11:48012238-48012529	-	292	11	48002465	48188911	+	884	ENSG00000149177	0	0.25	11	43383623	48237150	no_hmar
1384	11	48015384	48015712	AluSx3_dup384_11:48015384-48015712	-	329	11	48002465	48188911	+	884	ENSG00000149177	0	0.980392	11	43383623	48237150	no_hmar
1385	11	48028644	48028960	AluY_dup1838_11:48028644-48028960	-	317	11	48002465	48188911	+	884	ENSG00000149177	0	0.916667	11	43383623	48237150	no_hmar
1386	11	48080663	48080973	AluSx1_dup1479_11:48080663-48080973	-	311	11	48002465	48188911	+	884	ENSG00000149177	0	0.978389	11	43383623	48237150	no_hmar
1387	11	49056900	49057209	AluY_dup1858_11:49056900-49057209	-	310	11	49053152	49059526	+	0	ENSG00000182053	0	0.54657	11	48247113	51476568	hmar
1388	11	49152680	49152983	AluY_dup1861_11:49152680-49152983	-	304	11	49168311	49229961	-	0	ENSG00000086205	-15329	0.852941	11	48247113	51476568	hmar
1389	11	49289101	49289410	AluY_dup1864_11:49289101-49289410	-	310	11	49168311	49229961	-	0	ENSG00000086205	59141	0.641342	11	48247113	51476568	hmar
1390	11	49378456	49378762	AluSg_dup576_11:49378456-49378762	-	307	11	49168311	49229961	-	0	ENSG00000086205	148496	0.140692	11	48247113	51476568	hmar
1391	11	55930532	55930833	AluY_dup1921_11:55930532-55930833	+	302	11	55926873	55927793	-	0	ENSG00000181752	-2740	0.833333	11	55078389	56977276	hmar
1392	11	55973652	55973954	AluY_dup1922_11:55973652-55973954	-	303	11	55999585	56000661	-	0	ENSG00000181718	-25632	0.738525	11	55078389	56977276	hmar
1393	11	57109623	57109931	AluSz_dup1412_11:57109623-57109931	-	309	11	57106025	57137467	+	0	ENSG00000109991	0	0.725	11	57030034	57654614	no_hmar
1394	11	57336252	57336517	AluSz6_dup676_11:57336252-57336517	-	266	11	57319834	57335084	-	52	ENSG00000156587	1169	0.985714	11	57030034	57654614	no_hmar
1395	11	57521244	57521538	AluSx3_dup423_11:57521244-57521538	+	295	11	57480091	57556567	+	7	ENSG00000254462	0	0.950538	11	57030034	57654614	no_hmar
1396	11	57587917	57588228	AluSq2_dup837_11:57587917-57588228	-	312	11	57558951	57583777	+	2223	ENSG00000198561	4141	0.922222	11	57030034	57654614	no_hmar
1397	11	57812701	57813005	AluSz_dup1468_11:57812701-57813005	-	305	11	57798425	57799375	+	0	ENSG00000172381	13327	0.597701	11	57698886	57989141	hmar
1398	11	57834505	57834807	AluY_dup1976_11:57834505-57834807	-	303	11	57798425	57799375	+	0	ENSG00000172381	35131	0.774154	11	57698886	57989141	hmar
1399	11	57864176	57864475	AluSx1_dup1645_11:57864176-57864475	-	300	11	57885975	57886916	-	0	ENSG00000172377	-21501	0.809524	11	57698886	57989141	hmar
1400	11	58666026	58666323	AluY_dup1989_11:58666026-58666323	+	298	11	58672918	58674865	+	0	ENSG00000224130	6596	0.314465	11	58175689	78822514	no_hmar
1401	11	58717499	58717788	AluYc_dup146_11:58717499-58717788	+	290	11	58710772	58723497	+	0	ENSG00000166840	0	0.866667	11	58175689	78822514	no_hmar
1402	11	59242248	59242563	AluY_dup2001_11:59242248-59242563	+	316	11	59244903	59245835	+	0	ENSG00000254466	2341	0.960862	11	58175689	78822514	no_hmar
1403	11	60077465	60077784	AluY_dup2034_11:60077465-60077784	-	320	11	60048149	60075648	+	0	ENSG00000110079	1818	0.992308	11	58175689	78822514	no_hmar
1404	11	60161992	60162305	AluSq_dup1_11:60161992-60162305	+	314	11	60150615	60162430	+	0	ENSG00000166927	0	0.825108	11	58175689	78822514	no_hmar
1405	11	60748019	60748318	AluSx1_dup1724_11:60748019-60748318	+	300	11	60739338	60786787	+	0	ENSG00000013725	0	0.886111	11	58175689	78822514	no_hmar
1406	11	60804172	60804428	AluSp_dup829_11:60804172-60804428	-	257	11	60739338	60786787	+	0	ENSG00000013725	17386	0.927083	11	58175689	78822514	no_hmar
1407	11	61158679	61159012	AluSq2_dup898_11:61158679-61159012	+	334	11	61160104	61165745	+	28	ENSG00000187049	1093	0.558769	11	58175689	78822514	no_hmar
1408	11	61159162	61159462	AluSx_dup2262_11:61159162-61159462	-	301	11	61160104	61165745	+	28	ENSG00000187049	-643	0.911111	11	58175689	78822514	no_hmar
1409	11	61265867	61266182	AluSp_dup842_11:61265867-61266182	+	316	11	61249282	61258039	+	50	ENSG00000162148	-7829	0.866667	11	58175689	78822514	no_hmar
1410	11	61890012	61890310	AluSq2_dup938_11:61890012-61890310	-	299	11	61895634	61919445	+	1261	ENSG00000149503	-5325	0.972973	11	58175689	78822514	no_hmar
1411	11	61899249	61899560	AluSx1_dup1813_11:61899249-61899560	-	312	11	61895634	61919445	+	1261	ENSG00000149503	0	0.0833333	11	58175689	78822514	no_hmar
1412	11	61902724	61903035	AluSx1_dup1814_11:61902724-61903035	-	312	11	61895634	61919445	+	1261	ENSG00000149503	0	0.979539	11	58175689	78822514	no_hmar
1413	11	62304415	62304731	AluY_dup2150_11:62304415-62304731	-	317	11	62201313	62303570	-	20008	ENSG00000124942	846	0.978261	11	58175689	78822514	no_hmar
1414	11	62496838	62497041	AluSx_dup2424_11:62496838-62497041	-	204	11	62495836	62505851	+	119	ENSG00000162222	0	0.31746	11	58175689	78822514	no_hmar
1415	11	62522410	62522709	AluSz_dup1655_11:62522410-62522709	+	300	11	62519565	62521534	-	59	ENSG00000185670	-877	0.921053	11	58175689	78822514	no_hmar
1416	11	62527489	62527643	AluSx_dup2438_11:62527489-62527643	-	155	11	62529121	62533976	+	318	ENSG00000168002	-1479	0.86508	11	58175689	78822514	no_hmar
1417	11	62551481	62551760	AluSc_dup559_11:62551481-62551760	-	280	11	62539581	62559466	-	44	ENSG00000168569	0	0.716667	11	58175689	78822514	no_hmar
1418	11	62626949	62627181	AluSx_dup2461_11:62626949-62627181	+	233	11	62623742	62656162	+	3069	ENSG00000168003	0	0.915151	11	58175689	78822514	no_hmar
1419	11	62645347	62645655	AluSx_dup2466_11:62645347-62645655	+	309	11	62623742	62656162	+	3069	ENSG00000168003	0	0.222222	11	58175689	78822514	no_hmar
1420	11	63352499	63352794	AluSc_dup583_11:63352499-63352794	-	296	11	63342420	63381486	-	83	ENSG00000176485	0	0.933333	11	58175689	78822514	no_hmar
1421	11	63363432	63363736	AluY_dup2243_11:63363432-63363736	+	305	11	63342420	63381486	-	83	ENSG00000176485	0	0.610256	11	58175689	78822514	no_hmar
1422	11	63609687	63609977	AluSc_dup590_11:63609687-63609977	-	291	11	63606979	63676706	+	873	ENSG00000072518	0	0.968656	11	58175689	78822514	no_hmar
1423	11	63735648	63735955	AluY_dup2284_11:63735648-63735955	+	308	11	63742153	63743789	+	261	ENSG00000176340	6199	0.888889	11	58175689	78822514	no_hmar
1424	11	64095955	64096197	AluY_dup2309_11:64095955-64096197	-	243	11	64085688	64089160	+	480	ENSG00000126432	6796	0.916667	11	58175689	78822514	no_hmar
1425	11	64162787	64163045	AluSz_dup1765_11:64162787-64163045	-	259	11	64126708	64138949	+	722	ENSG00000162302	23839	0.555555	11	58175689	78822514	no_hmar
1426	11	64466893	64467183	AluSp_dup995_11:64466893-64467183	-	291	11	64374671	64481171	-	12	ENSG00000110076	0	0.777778	11	58175689	78822514	no_hmar
1427	11	64686931	64687200	AluJo_dup1225_11:64686931-64687200	+	270	11	64662448	64684607	-	503	ENSG00000110046	-2325	1	11	58175689	78822514	no_hmar
1428	11	64754690	64754992	AluY_dup2347_11:64754690-64754992	+	303	11	64756604	64764386	-	4	ENSG00000168062	1613	0.941099	11	58175689	78822514	no_hmar
1429	11	64810003	64810313	AluSz_dup1811_11:64810003-64810313	-	311	11	64808717	64812196	+	167	ENSG00000168061	0	0.978871	11	58175689	78822514	no_hmar
1430	11	64862715	64863020	AluSx4_dup116_11:64862715-64863020	-	306	11	64857948	64879056	+	596	ENSG00000149823	0	0.833333	11	58175689	78822514	no_hmar
1431	11	64885630	64885936	AluSx1_dup2037_11:64885630-64885936	+	307	11	64883917	64885125	-	65	ENSG00000174276	-506	0.802469	11	58175689	78822514	no_hmar
1432	11	64938086	64938379	AluSx3_dup543_11:64938086-64938379	+	294	11	64937707	64940685	+	0	ENSG00000204710	0	0.923423	11	58175689	78822514	no_hmar
1433	11	65005226	65005533	AluSg4_dup141_11:65005226-65005533	-	308	11	65029764	65072969	+	443	ENSG00000014138	-24232	0.96124	11	58175689	78822514	no_hmar
1434	11	65015273	65015548	AluJb_dup2739_11:65015273-65015548	+	276	11	65029764	65072969	+	443	ENSG00000014138	14217	0.948718	11	58175689	78822514	no_hmar
1435	11	65177980	65178293	AluY_dup2395_11:65177980-65178293	+	314	11	65154508	65178828	+	140	ENSG00000126391	0	0.6875	11	58175689	78822514	no_hmar
1436	11	65232921	65233230	AluSp_dup1024_11:65232921-65233230	-	310	11	65222728	65233671	+	45	ENSG00000173727	0	0.986111	11	58175689	78822514	no_hmar
1437	11	65250485	65250805	AluY_dup2402_11:65250485-65250805	+	321	11	65222728	65233671	+	45	ENSG00000173727	-16815	0.992188	11	58175689	78822514	no_hmar
1438	11	65280576	65280873	AluSz_dup1846_11:65280576-65280873	-	298	11	65292625	65306034	+	1092	ENSG00000142186	-11753	0.333333	11	58175689	78822514	no_hmar
1439	11	65448306	65448562	AluSx3_dup555_11:65448306-65448562	-	257	11	65421852	65430303	-	583	ENSG00000173039	18004	0.5	11	58175689	78822514	no_hmar
1440	11	65478250	65478550	AluY_dup2427_11:65478250-65478550	-	301	11	65479739	65486649	+	426	ENSG00000172977	-1190	0.757576	11	58175689	78822514	no_hmar
1441	11	65478738	65478943	AluJb_dup2804_11:65478738-65478943	+	206	11	65479739	65486649	+	426	ENSG00000172977	797	0.0182683	11	58175689	78822514	no_hmar
1442	11	65703146	65703443	AluY_dup2449_11:65703146-65703443	-	298	11	65686973	65688903	+	676	ENSG00000175550	14244	0.891346	11	58175689	78822514	no_hmar
1443	11	66148535	66148825	AluY_dup2489_11:66148535-66148825	-	291	11	66130910	66139062	-	148	ENSG00000174669	9474	0.974383	11	58175689	78822514	no_hmar
1444	11	66152656	66152958	AluY_dup2492_11:66152656-66152958	-	303	11	66130910	66139062	-	148	ENSG00000174669	13595	0.451851	11	58175689	78822514	no_hmar
1445	11	66156865	66157075	AluSp_dup1071_11:66156865-66157075	+	211	11	66130910	66139062	-	148	ENSG00000174669	-17804	0.823658	11	58175689	78822514	no_hmar
1446	11	66271076	66271369	AluSc8_dup453_11:66271076-66271369	+	294	11	66247885	66276719	+	495	ENSG00000254986	0	0.962963	11	58175689	78822514	no_hmar
1447	11	66273724	66274025	AluSq_dup421_11:66273724-66274025	-	302	11	66247885	66276719	+	495	ENSG00000254986	0	0.992248	11	58175689	78822514	no_hmar
1448	11	66284389	66284699	AluY_dup2506_11:66284389-66284699	+	311	11	66276628	66299505	+	3	ENSG00000256349	0	0.957447	11	58175689	78822514	no_hmar
1449	11	66304061	66304375	AluSp_dup1076_11:66304061-66304375	+	315	11	66294431	66313474	-	28	ENSG00000174165	0	0.947917	11	58175689	78822514	no_hmar
1450	11	66305889	66306027	AluSx_dup2898_11:66305889-66306027	+	139	11	66294431	66313474	-	28	ENSG00000174165	0	0.973684	11	58175689	78822514	no_hmar
1451	11	66379233	66379532	AluSz_dup1941_11:66379233-66379532	-	300	11	66384192	66394136	+	302	ENSG00000239306	-4661	0.974843	11	58175689	78822514	no_hmar
1452	11	66416005	66416293	AluSq10_dup55_11:66416005-66416293	+	289	11	66407183	66433433	+	60	ENSG00000173933	0	1	11	58175689	78822514	no_hmar
1453	11	66666338	66666640	AluSp_dup1093_11:66666338-66666640	-	303	11	66616373	66639630	-	176	ENSG00000173599	26709	0.962254	11	58175689	78822514	no_hmar
1454	11	66710928	66711256	AluY_dup2567_11:66710928-66711256	+	329	11	66742834	66743719	+	0	ENSG00000173237	31579	0.897448	11	58175689	78822514	no_hmar
1455	11	66713276	66713589	AluYb8_dup67_11:66713276-66713589	+	314	11	66742834	66743719	+	0	ENSG00000173237	29246	0.965116	11	58175689	78822514	no_hmar
1456	11	66731698	66732016	AluSz_dup1974_11:66731698-66732016	+	319	11	66742834	66743719	+	0	ENSG00000173237	10819	0.965517	11	58175689	78822514	no_hmar
1457	11	66775025	66775332	AluSq2_dup1131_11:66775025-66775332	-	308	11	66797616	66816225	+	23	ENSG00000173227	-22285	0.900966	11	58175689	78822514	no_hmar
1458	11	66779225	66779531	AluSg_dup847_11:66779225-66779531	-	307	11	66797616	66816225	+	23	ENSG00000173227	-18086	0.987179	11	58175689	78822514	no_hmar
1459	11	66806493	66806782	AluSx_dup2992_11:66806493-66806782	+	290	11	66797616	66816225	+	23	ENSG00000173227	0	0.333333	11	58175689	78822514	no_hmar
1460	11	66870859	66871152	AluSz_dup1989_11:66870859-66871152	-	294	11	66888788	67022523	+	1026	ENSG00000173120	-17637	0.985714	11	58175689	78822514	no_hmar
1461	11	66893266	66893434	AluSx1_dup2243_11:66893266-66893434	+	169	11	66888788	67022523	+	1026	ENSG00000173120	0	0.988304	11	58175689	78822514	no_hmar
1462	11	66944447	66944743	AluSx1_dup2250_11:66944447-66944743	+	297	11	66888788	67022523	+	1026	ENSG00000173120	0	0.973793	11	58175689	78822514	no_hmar
1463	11	66976397	66976703	AluSz_dup2003_11:66976397-66976703	-	307	11	66888788	67022523	+	1026	ENSG00000173120	0	0.962847	11	58175689	78822514	no_hmar
1464	11	67158405	67158699	AluJo_dup1386_11:67158405-67158699	+	295	11	67159516	67165027	+	132	ENSG00000172613	818	0.557226	11	58175689	78822514	no_hmar
1465	11	67282360	67282685	AluSx1_dup2276_11:67282360-67282685	-	326	11	67286613	67290797	-	0	ENSG00000167791	-3929	0.807692	11	58175689	78822514	no_hmar
1466	11	67814471	67814786	AluSx1_dup2322_11:67814471-67814786	-	316	11	67808739	67818283	+	322	ENSG00000110719	0	0.4	11	58175689	78822514	no_hmar
1467	11	67890952	67891248	AluY_dup2670_11:67890952-67891248	+	297	11	67821458	67888644	-	262	ENSG00000110721	-2309	1	11	58175689	78822514	no_hmar
1468	11	68002924	68003219	AluSz_dup2078_11:68002924-68003219	+	296	11	68029116	68031235	-	287	ENSG00000171067	25898	0.850877	11	58175689	78822514	no_hmar
1469	11	68166216	68166484	AluJb_dup3143_11:68166216-68166484	-	269	11	68080183	68216535	+	967	ENSG00000162337	0	0.0833333	11	58175689	78822514	no_hmar
1470	11	68231612	68231896	AluSg7_dup185_11:68231612-68231896	-	285	11	68080183	68216535	+	967	ENSG00000162337	15078	0.733333	11	58175689	78822514	no_hmar
1471	11	68278539	68278832	AluSg_dup901_11:68278539-68278832	-	294	11	68305133	68382142	+	2351	ENSG00000110075	-26302	0.979796	11	58175689	78822514	no_hmar
1472	11	68577366	68577664	AluSz_dup2118_11:68577366-68577664	+	299	11	68522287	68582942	-	1304	ENSG00000110090	0	0.569445	11	58175689	78822514	no_hmar
1473	11	68633591	68633901	AluSp_dup1166_11:68633591-68633901	+	311	11	68658802	68671278	-	462	ENSG00000197345	24902	0.400866	11	58175689	78822514	no_hmar
1474	11	68682948	68683250	AluSz_dup2128_11:68682948-68683250	-	303	11	68671421	68707196	+	213	ENSG00000132740	0	0.958333	11	58175689	78822514	no_hmar
1475	11	68787629	68787898	AluSx_dup3219_11:68787629-68787898	-	270	11	68772749	68777369	-	0	ENSG00000172935	10261	0.423913	11	58175689	78822514	no_hmar
1476	11	68974143	68974441	AluSz6_dup957_11:68974143-68974441	-	299	11	69062822	69063856	+	390	ENSG00000172927	-88382	0.275	11	58175689	78822514	no_hmar
1477	11	69437179	69437453	AluJb_dup3235_11:69437179-69437453	-	275	11	69456082	69466047	+	1639	ENSG00000110092	-18630	1	11	58175689	78822514	no_hmar
1478	11	69605009	69605304	AluSz_dup2156_11:69605009-69605304	+	296	11	69588080	69589852	-	0	ENSG00000075388	-15158	0.416667	11	58175689	78822514	no_hmar
1479	11	70166543	70166842	AluJb_dup3295_11:70166543-70166842	-	300	11	70118279	70229283	+	1733	ENSG00000131626	0	0.988095	11	58175689	78822514	no_hmar
1480	11	70232788	70233086	AluY_dup2783_11:70232788-70233086	-	299	11	70118279	70229283	+	1733	ENSG00000131626	3506	1	11	58175689	78822514	no_hmar
1481	11	70376342	70376670	AluJr_dup1626_11:70376342-70376670	+	329	11	70318977	70858372	-	392	ENSG00000162105	0	0.791029	11	58175689	78822514	no_hmar
1482	11	70386781	70386966	AluSx1_dup2491_11:70386781-70386966	+	186	11	70318977	70858372	-	392	ENSG00000162105	0	0.805556	11	58175689	78822514	no_hmar
1483	11	70737338	70737632	AluYc_dup210_11:70737338-70737632	+	295	11	70318977	70858372	-	392	ENSG00000162105	0	0.927976	11	58175689	78822514	no_hmar
1484	11	71186763	71187059	AluSx_dup3357_11:71186763-71187059	-	297	11	71164343	71232195	+	282	ENSG00000172890	0	1	11	58175689	78822514	no_hmar
1485	11	71488803	71489091	AluSx1_dup2550_11:71488803-71489091	+	289	11	71498583	71510690	+	28	ENSG00000158483	9493	0.936364	11	58175689	78822514	no_hmar
1486	11	71636694	71636949	AluYc_dup214_11:71636694-71636949	+	256	11	71576886	71639632	-	23	ENSG00000254469	0	0.470833	11	58175689	78822514	no_hmar
1487	11	71670678	71670981	AluSz_dup2252_11:71670678-71670981	-	304	11	71640108	71707358	+	127	ENSG00000137522	0	0.991228	11	58175689	78822514	no_hmar
1488	11	71673013	71673308	AluY_dup2841_11:71673013-71673308	-	296	11	71640108	71707358	+	127	ENSG00000137522	0	0.568182	11	58175689	78822514	no_hmar
1489	11	71792187	71792459	AluJb_dup3407_11:71792187-71792459	+	273	11	71797458	71814270	-	225	ENSG00000149357	5000	0.613327	11	58175689	78822514	no_hmar
1490	11	72599653	72599966	AluJb_dup3484_11:72599653-72599966	-	314	11	72549839	72852922	-	327	ENSG00000137478	0	0.964286	11	58175689	78822514	no_hmar
1491	11	73295515	73295821	AluY_dup2948_11:73295515-73295821	-	307	11	73357654	73372644	+	49	ENSG00000021300	-61834	1	11	58175689	78822514	no_hmar
1492	11	73499510	73499815	AluSg_dup990_11:73499510-73499815	-	306	11	73499017	73575412	+	377	ENSG00000175581	0	0.0305392	11	58175689	78822514	no_hmar
1493	11	73613734	73614042	AluSx3_dup664_11:73613734-73614042	-	309	11	73588067	73638404	+	100	ENSG00000175575	0	1	11	58175689	78822514	no_hmar
1494	11	74246371	74246653	AluSx3_dup670_11:74246371-74246653	-	283	11	74203183	74204748	-	19	ENSG00000175536	41624	0.9375	11	58175689	78822514	no_hmar
1495	11	74614467	74614765	AluY_dup3032_11:74614467-74614765	+	299	11	74554248	74651923	-	219	ENSG00000166435	0	0.888889	11	58175689	78822514	no_hmar
1496	11	74683115	74683408	AluSq2_dup1359_11:74683115-74683408	-	294	11	74660331	74688085	+	311	ENSG00000118363	0	0.951219	11	58175689	78822514	no_hmar
1497	11	74960033	74960344	AluJb_dup3713_11:74960033-74960344	+	312	11	74977210	75062651	-	190	ENSG00000137486	16867	0.015873	11	58175689	78822514	no_hmar
1498	11	75064845	75065020	AluY_dup3051_11:75064845-75065020	-	176	11	74977210	75062651	-	190	ENSG00000137486	2195	0.284553	11	58175689	78822514	no_hmar
1499	11	75540875	75541184	AluSz6_dup1101_11:75540875-75541184	-	310	11	75526453	75852454	+	161	ENSG00000198382	0	0.333333	11	58175689	78822514	no_hmar
1500	11	75751280	75751543	AluY_dup3096_11:75751280-75751543	+	264	11	75526453	75852454	+	161	ENSG00000198382	0	0.888889	11	58175689	78822514	no_hmar
1501	11	76077446	76077741	AluY_dup3104_11:76077446-76077741	+	296	11	76061911	76091880	-	991	ENSG00000137492	0	0.966667	11	58175689	78822514	no_hmar
1502	11	76178754	76179047	AluSp_dup1320_11:76178754-76179047	+	294	11	76157983	76261187	+	609	ENSG00000158636	0	0.961538	11	58175689	78822514	no_hmar
1503	11	77016310	77016607	AluSx1_dup2816_11:77016310-77016607	-	298	11	77034185	77103565	-	653	ENSG00000149269	-17579	1	11	58175689	78822514	no_hmar
1504	11	77170727	77171039	AluYk4_dup42_11:77170727-77171039	-	313	11	77034185	77103565	-	653	ENSG00000149269	67163	0.766414	11	58175689	78822514	no_hmar
1505	11	77281238	77281538	AluSc_dup831_11:77281238-77281538	+	301	11	77301038	77320419	+	19	ENSG00000178301	19501	0.291667	11	58175689	78822514	no_hmar
1506	11	77328132	77328437	AluSp_dup1345_11:77328132-77328437	+	306	11	77330676	77348759	-	944	ENSG00000074201	2240	1	11	58175689	78822514	no_hmar
1507	11	77533981	77534284	AluY_dup3149_11:77533981-77534284	+	304	11	77377965	77531760	-	1419	ENSG00000048649	-2222	0.964286	11	58175689	78822514	no_hmar
1508	11	77723893	77724188	AluSx_dup3770_11:77723893-77724188	+	296	11	77727642	77734295	-	74	ENSG00000151364	3455	0.35	11	58175689	78822514	no_hmar
1509	11	78222482	78222783	AluY_dup3190_11:78222482-78222783	+	302	11	78147719	78285533	-	350	ENSG00000137513	0	0.954545	11	58175689	78822514	no_hmar
1510	11	79551519	79551798	AluY_dup3212_11:79551519-79551798	+	280	11	78369047	78780989	-	0	ENSG00000149256	-770531	1	11	79009484	82160839	hmar
1511	11	79609977	79610252	AluYc_dup240_11:79609977-79610252	+	276	11	78369047	78780989	-	0	ENSG00000149256	-828989	0.933333	11	79009484	82160839	hmar
1512	11	79970717	79971019	AluY_dup3218_11:79970717-79971019	+	303	11	78369047	78780989	-	0	ENSG00000149256	-1189729	0.473595	11	79009484	82160839	hmar
1513	11	82480503	82480810	AluSq2_dup1488_11:82480503-82480810	+	308	11	82443494	82444771	-	0	ENSG00000182103	-35733	0.650794	11	82183511	83245910	no_hmar
1514	11	82809923	82810235	AluSx1_dup2986_11:82809923-82810235	+	313	11	82868482	82895933	+	1732	ENSG00000165494	58248	0.978723	11	82183511	83245910	no_hmar
1515	11	83245696	83245985	AluSx1_dup3003_11:83245696-83245985	+	290	11	83170864	85309740	-	4	ENSG00000150672	0	0.950691	11	82183511	83245910	no_hmar
1516	11	83378741	83379044	AluY_dup3303_11:83378741-83379044	+	304	11	83170864	85309740	-	4	ENSG00000150672	0	0.624882	11	83248782	85270288	hmar
1517	11	84018501	84018762	AluYk4_dup48_11:84018501-84018762	+	262	11	83170864	85309740	-	4	ENSG00000150672	0	0.830104	11	83248782	85270288	hmar
1518	11	86786207	86786495	AluY_dup3413_11:86786207-86786495	-	289	11	86749088	87032372	+	390	ENSG00000166575	0	0.963708	11	85316946	88843906	no_hmar
1519	11	86934204	86934512	AluY_dup3422_11:86934204-86934512	-	309	11	86749088	87032372	+	390	ENSG00000166575	0	1	11	85316946	88843906	no_hmar
1520	11	88739947	88740264	AluY_dup3473_11:88739947-88740264	-	318	11	88241763	88781040	-	0	ENSG00000168959	0	0.940477	11	85316946	88843906	no_hmar
1521	11	90710844	90710938	AluYb8_dup92_11:90710844-90710938	+	95	11	89935576	89956122	-	1323	ENSG00000110172	-754723	0.857208	11	90074711	92637142	hmar
1522	11	91259430	91259723	AluSx3_dup786_11:91259430-91259723	-	294	11	92085279	92624276	+	0	ENSG00000165323	-825557	0.94552	11	90074711	92637142	hmar
1523	11	93664082	93664401	AluY_dup3618_11:93664082-93664401	+	320	11	93553738	93583668	-	2	ENSG00000214376	-80415	0.627381	11	92669233	93664294	no_hmar
1524	11	93769785	93770023	AluY_dup3622_11:93769785-93770023	+	239	11	93754535	93845057	+	15	ENSG00000181333	0	0.94877	11	93730354	93980892	hmar
1525	11	94317950	94318248	AluSp_dup1517_11:94317950-94318248	+	299	11	94278979	94354155	+	12	ENSG00000134627	0	0.962963	11	94027019	95026693	no_hmar
1526	11	94339714	94340014	AluSx3_dup803_11:94339714-94340014	+	301	11	94278979	94354155	+	12	ENSG00000134627	0	0.746032	11	94027019	95026693	no_hmar
1527	11	94567472	94567768	AluY_dup3647_11:94567472-94567768	+	297	11	94462137	94603957	+	663	ENSG00000166025	0	0.595238	11	94027019	95026693	no_hmar
1528	11	95854945	95855273	AluY_dup3683_11:95854945-95855273	-	329	11	95712115	96075059	-	81	ENSG00000184384	0	0.82353	11	95435405	96156735	no_hmar
1529	11	96055581	96055877	AluY_dup3700_11:96055581-96055877	+	297	11	95712115	96075059	-	81	ENSG00000184384	0	0.869979	11	95435405	96156735	no_hmar
1530	11	96495686	96495981	AluY_dup3711_11:96495686-96495981	+	296	11	96123814	96125385	+	151	ENSG00000183340	-370302	0.416667	11	96219901	100425247	hmar
1531	11	97250793	97251065	AluSq_dup638_11:97250793-97251065	-	273	11	96123814	96125385	+	151	ENSG00000183340	1125409	0.931842	11	96219901	100425247	hmar
1532	11	98035461	98035768	AluY_dup3750_11:98035461-98035768	-	308	11	99426946	100226948	+	0	ENSG00000149972	-1391179	0.847674	11	96219901	100425247	hmar
1533	11	98244039	98244340	AluY_dup3761_11:98244039-98244340	+	302	11	99426946	100226948	+	0	ENSG00000149972	1182607	0.617155	11	96219901	100425247	hmar
1534	11	98284747	98285075	AluY_dup3764_11:98284747-98285075	-	329	11	99426946	100226948	+	0	ENSG00000149972	-1141872	0.583333	11	96219901	100425247	hmar
1535	11	99181670	99181957	AluSg_dup1246_11:99181670-99181957	-	288	11	99426946	100226948	+	0	ENSG00000149972	-244990	0.75	11	96219901	100425247	hmar
1536	11	99749320	99749593	AluSc_dup1032_11:99749320-99749593	+	274	11	99426946	100226948	+	0	ENSG00000149972	0	0.908143	11	96219901	100425247	hmar
1537	11	99794541	99794820	AluSc_dup1033_11:99794541-99794820	-	280	11	99426946	100226948	+	0	ENSG00000149972	0	0.939394	11	96219901	100425247	hmar
1538	11	99802917	99803224	AluSq2_dup1652_11:99802917-99803224	-	308	11	99426946	100226948	+	0	ENSG00000149972	0	0.921777	11	96219901	100425247	hmar
1539	11	100596389	100596682	AluY_dup3852_11:100596389-100596682	+	294	11	100558410	100859529	+	252	ENSG00000165895	0	0.942529	11	100458016	100895063	no_hmar
1540	11	100891713	100891983	AluJb_dup4580_11:100891713-100891983	-	271	11	100909850	100999801	-	0	ENSG00000082175	-17868	0.985816	11	100458016	100895063	no_hmar
1541	11	101289251	101289561	AluY_dup3866_11:101289251-101289561	-	311	11	101323689	101454234	-	0	ENSG00000137672	-34129	0.726745	11	101274521	105934582	no_hmar
1542	11	101363033	101363322	AluJb_dup4586_11:101363033-101363322	+	290	11	101323689	101454234	-	0	ENSG00000137672	0	0.683333	11	101274521	105934582	no_hmar
1543	11	101771578	101771907	AluY_dup3872_11:101771578-101771907	-	330	11	101762013	101778640	-	0	ENSG00000187151	0	0.92	11	101274521	105934582	no_hmar
1544	11	101884984	101885285	AluY_dup3874_11:101884984-101885285	-	302	11	101786016	101868371	+	120	ENSG00000110318	16614	0.429644	11	101274521	105934582	no_hmar
1545	11	101955981	101956293	AluY_dup3877_11:101955981-101956293	+	313	11	101918202	101953927	+	0	ENSG00000137691	-2055	0.985714	11	101274521	105934582	no_hmar
1546	11	101969317	101969612	AluY_dup3880_11:101969317-101969612	+	296	11	101981580	102100668	+	1441	ENSG00000137693	11969	0.666667	11	101274521	105934582	no_hmar
1547	11	102222068	102222375	AluSx_dup4382_11:102222068-102222375	+	308	11	102219434	102248911	+	596	ENSG00000110330	0	0.323099	11	101274521	105934582	no_hmar
1548	11	102391933	102392224	AluSz6_dup1402_11:102391933-102392224	-	292	11	102391510	102401431	-	6	ENSG00000137673	0	0.965686	11	101274521	105934582	no_hmar
1549	11	102741725	102741970	AluJr_dup2282_11:102741725-102741970	+	246	11	102706860	102714277	-	0	ENSG00000149968	-27449	0.971015	11	101274521	105934582	no_hmar
1550	11	103644307	103644478	AluSx1_dup3441_11:103644307-103644478	-	172	11	103780425	104034655	-	0	ENSG00000170962	-135948	0.963214	11	101274521	105934582	no_hmar
1551	11	103843867	103844159	AluY_dup3937_11:103843867-103844159	-	293	11	103780425	104034655	-	0	ENSG00000170962	0	0.444445	11	101274521	105934582	no_hmar
1552	11	103915485	103915791	AluY_dup3941_11:103915485-103915791	+	307	11	103780425	104034655	-	0	ENSG00000170962	0	0.460526	11	101274521	105934582	no_hmar
1553	11	107742830	107743120	AluSp_dup1643_11:107742830-107743120	+	291	11	107663344	107729493	-	414	ENSG00000110660	-13338	1	11	106937488	110661701	no_hmar
1554	11	107759214	107759496	AluSc_dup1115_11:107759214-107759496	-	283	11	107663344	107729493	-	414	ENSG00000110660	29722	0.98121	11	106937488	110661701	no_hmar
1555	11	107972739	107973054	AluSx3_dup889_11:107972739-107973054	-	316	11	107880075	107975108	+	827	ENSG00000166266	0	1	11	106937488	110661701	no_hmar
1556	11	108442507	108442789	AluYc3_dup15_11:108442507-108442789	+	283	11	108380267	108464460	-	1169	ENSG00000110723	0	0.592593	11	106937488	110661701	no_hmar
1557	11	108486682	108486984	AluSz6_dup1497_11:108486682-108486984	+	303	11	108380267	108464460	-	1169	ENSG00000110723	-22223	0.958333	11	106937488	110661701	no_hmar
1558	11	108979427	108979739	AluY_dup4112_11:108979427-108979739	-	313	11	108535881	108811147	+	1801	ENSG00000178105	168281	0.834832	11	106937488	110661701	no_hmar
1559	11	109204740	109205049	AluY_dup4120_11:109204740-109205049	-	310	11	109294360	109294950	+	0	ENSG00000185742	-89312	0.933398	11	106937488	110661701	no_hmar
1560	11	110085804	110086137	AluY_dup4141_11:110085804-110086137	+	334	11	110070340	110150417	-	2848	ENSG00000137710	0	0.985507	11	106937488	110661701	no_hmar
1561	11	110164837	110165109	AluSz6_dup1521_11:110164837-110165109	+	273	11	110070340	110150417	-	2848	ENSG00000137710	-14421	0.400662	11	106937488	110661701	no_hmar
1562	11	110207882	110208193	AluY_dup4148_11:110207882-110208193	+	312	11	110070340	110150417	-	2848	ENSG00000137710	-57466	0.8	11	106937488	110661701	no_hmar
1563	11	110759569	110759863	AluY_dup4165_11:110759569-110759863	-	295	11	110447867	110582954	-	1	ENSG00000137727	176616	0.905526	11	110705159	111135145	hmar
1564	11	111578828	111579132	AluSz_dup3302_11:111578828-111579132	+	305	11	111473288	111594850	+	382	ENSG00000170145	0	1	11	111153856	111772080	no_hmar
1565	11	113736738	113737037	AluSx_dup4801_11:113736738-113737037	+	300	11	113669965	113746223	-	420	ENSG00000048028	0	0.97419	11	113482089	114340304	no_hmar
1566	11	113759257	113759569	AluY_dup4252_11:113759257-113759569	-	313	11	113669965	113746223	-	420	ENSG00000048028	13035	0.926946	11	113482089	114340304	no_hmar
1567	11	113793265	113793575	AluY_dup4257_11:113793265-113793575	-	311	11	113775656	113816856	+	0	ENSG00000149305	0	0.916667	11	113482089	114340304	no_hmar
1568	11	113989705	113990014	AluSx1_dup3771_11:113989705-113990014	+	310	11	113934023	114121274	+	0	ENSG00000109906	0	0.333333	11	113482089	114340304	no_hmar
1569	11	114119899	114120205	AluSz_dup3425_11:114119899-114120205	+	307	11	113934023	114121274	+	0	ENSG00000109906	0	1	11	113482089	114340304	no_hmar
1570	11	114608523	114608817	AluSx_dup4842_11:114608523-114608817	+	295	11	114549298	114578227	+	0	ENSG00000204361	-30297	0.555556	11	114346058	116430107	hmar
1571	11	114632284	114632595	AluYb8_dup121_11:114632284-114632595	-	312	11	114549298	114578227	+	0	ENSG00000204361	54058	0.725	11	114346058	116430107	hmar
1572	11	115163870	115164168	AluY_dup4293_11:115163870-115164168	+	299	11	115047197	115375675	-	0	ENSG00000182985	0	0.261457	11	114346058	116430107	hmar
1573	11	116084098	116084389	AluSc8_dup785_11:116084098-116084389	+	292	11	116619201	116643680	-	587	ENSG00000137656	534813	0.111111	11	114346058	116430107	hmar
1574	11	116975908	116976203	AluY_dup4344_11:116975908-116976203	+	296	11	116717115	116969131	-	693	ENSG00000160584	-6778	0.887517	11	116451546	123526589	no_hmar
1575	11	117224721	117225032	AluSx1_dup3865_11:117224721-117225032	-	312	11	117209303	117282881	+	443	ENSG00000110274	0	0.450605	11	116451546	123526589	no_hmar
1576	11	118304273	118304555	AluYf4_dup56_11:118304273-118304555	-	283	11	118305380	118305820	-	1	ENSG00000255384	-826	0.70098	11	116451546	123526589	no_hmar
1577	11	118455527	118455839	AluY_dup4398_11:118455527-118455839	-	313	11	118443263	118472440	+	1951	ENSG00000095139	0	0.822222	11	116451546	123526589	no_hmar
1578	11	118459451	118459762	AluSq2_dup1946_11:118459451-118459762	+	312	11	118443263	118472440	+	1951	ENSG00000095139	0	0.975997	11	116451546	123526589	no_hmar
1579	11	118647262	118647568	AluSc8_dup811_11:118647262-118647568	+	307	11	118625424	118656960	-	1950	ENSG00000110367	0	0.666667	11	116451546	123526589	no_hmar
1580	11	118697038	118697345	AluSp_dup1822_11:118697038-118697345	+	308	11	118625424	118656960	-	1950	ENSG00000110367	-40079	0.111111	11	116451546	123526589	no_hmar
1581	11	118750815	118751082	AluY_dup4418_11:118750815-118751082	-	268	11	118754651	118765369	+	2	ENSG00000160683	-3570	0.985988	11	116451546	123526589	no_hmar
1582	11	119108934	119109219	AluSz6_dup1678_11:119108934-119109219	-	286	11	119077128	119170488	+	792	ENSG00000110395	0	0.512987	11	116451546	123526589	no_hmar
1583	11	119220483	119220792	AluSx1_dup3990_11:119220483-119220792	+	310	11	119212261	119217223	-	0	ENSG00000235718	-3261	0.965278	11	116451546	123526589	no_hmar
1584	11	120361936	120362120	AluSx_dup5213_11:120361936-120362120	-	185	11	120207953	120355783	+	4164	ENSG00000196914	6154	0.958333	11	116451546	123526589	no_hmar
1585	11	120555426	120555705	AluYc_dup344_11:120555426-120555705	-	280	11	120531028	120856966	+	16	ENSG00000149403	0	0.282051	11	116451546	123526589	no_hmar
1586	11	120705958	120706265	AluSx1_dup4037_11:120705958-120706265	+	308	11	120531028	120856966	+	16	ENSG00000149403	0	0.416667	11	116451546	123526589	no_hmar
1587	11	120726274	120726571	AluSx1_dup4038_11:120726274-120726571	-	298	11	120531028	120856966	+	16	ENSG00000149403	0	0.955534	11	116451546	123526589	no_hmar
1588	11	121115811	121116103	AluSg_dup1528_11:121115811-121116103	-	293	11	120973375	121061512	+	52	ENSG00000109927	54300	0.973173	11	116451546	123526589	no_hmar
1589	11	121826805	121827113	AluY_dup4519_11:121826805-121827113	+	309	11	121986307	121986630	-	55	ENSG00000259571	159195	0.976136	11	116451546	123526589	no_hmar
1590	11	122511957	122512259	AluY_dup4540_11:122511957-122512259	+	303	11	122526758	122680591	+	381	ENSG00000154127	14500	1	11	116451546	123526589	no_hmar
1591	11	122873305	122873600	AluSx1_dup4117_11:122873305-122873600	-	296	11	122848360	122852379	-	0	ENSG00000188909	20927	1	11	116451546	123526589	no_hmar
1592	11	123226602	123226912	AluSx_dup5376_11:123226602-123226912	+	311	11	123301501	123306172	+	0	ENSG00000254667	74590	0.466667	11	116451546	123526589	no_hmar
1593	11	123343031	123343153	AluJb_dup5681_11:123343031-123343153	-	123	11	123301501	123306172	+	0	ENSG00000254667	36860	0.166667	11	116451546	123526589	no_hmar
1594	11	123386482	123386776	AluSz_dup3811_11:123386482-123386776	-	295	11	123396857	123493300	+	155	ENSG00000023171	-10082	0.9583	11	116451546	123526589	no_hmar
1595	11	123995991	123996289	AluYk4_dup70_11:123995991-123996289	-	299	11	123988171	124016649	+	28	ENSG00000110002	0	0.75	11	123543068	124464273	hmar
1596	11	124428138	124428428	AluSx_dup5415_11:124428138-124428428	+	291	11	124439965	124440942	+	0	ENSG00000196119	11538	0.833333	11	123543068	124464273	hmar
1597	11	125179284	125179583	AluSq2_dup2096_11:125179284-125179583	-	300	11	125221202	125301285	+	1	ENSG00000165495	-41620	0.666667	11	124475220	126289465	no_hmar
1598	11	125324630	125324937	AluSg_dup1576_11:125324630-125324937	+	308	11	125315994	125359673	-	19	ENSG00000149557	0	0.925926	11	124475220	126289465	no_hmar
1599	11	126216798	126216999	AluSx1_dup4257_11:126216798-126216999	+	202	11	126173976	126215505	+	178	ENSG00000110063	-1294	0.992647	11	124475220	126289465	no_hmar
1600	11	126232081	126232395	AluSx1_dup4259_11:126232081-126232395	-	315	11	126228320	126283939	+	99	ENSG00000110080	0	0.979167	11	124475220	126289465	no_hmar
1601	11	127669766	127670056	AluY_dup4710_11:127669766-127670056	-	291	11	128332259	128443025	-	59	ENSG00000134954	-662204	0.909091	11	126299957	127868987	hmar
1602	11	127797243	127797465	AluY_dup4714_11:127797243-127797465	-	223	11	128332259	128443025	-	59	ENSG00000134954	-534795	0.894737	11	126299957	127868987	hmar
1603	11	128626813	128626936	AluJb_dup5845_11:128626813-128626936	-	124	11	128564154	128680880	+	0	ENSG00000151702	0	0.80303	11	127881372	130394363	no_hmar
1604	11	129354779	129355078	AluY_dup4758_11:129354779-129355078	-	300	11	129245931	129321294	+	5	ENSG00000043039	33486	0.92647	11	127881372	130394363	no_hmar
1605	11	132365504	132365806	AluY_dup4848_11:132365504-132365806	+	303	11	132290090	133402219	-	0	ENSG00000183715	0	0.432845	11	130491075	133987196	hmar
1606	11	132666457	132666718	AluY_dup4856_11:132666457-132666718	-	262	11	132290090	133402219	-	0	ENSG00000183715	0	0.35321	11	130491075	133987196	hmar
1607	11	132804753	132805051	AluSp_dup2030_11:132804753-132805051	+	299	11	132290090	133402219	-	0	ENSG00000183715	0	0.0346379	11	130491075	133987196	hmar
1608	11	132997245	132997541	AluJb_dup5992_11:132997245-132997541	+	297	11	132290090	133402219	-	0	ENSG00000183715	0	0.520635	11	130491075	133987196	hmar
1609	11	133260072	133260356	AluY_dup4870_11:133260072-133260356	+	285	11	132290090	133402219	-	0	ENSG00000183715	0	0.55	11	130491075	133987196	hmar
1610	11	133522944	133523081	AluSx_dup5667_11:133522944-133523081	-	138	11	132290090	133402219	-	0	ENSG00000183715	120726	0.71732	11	130491075	133987196	hmar
1611	11	134199829	134200123	AluSx1_dup4434_11:134199829-134200123	+	295	11	134201956	134244949	+	349	ENSG00000149328	1834	0.897052	11	134017273	134242371	no_hmar
1612	11	134230768	134231068	AluY_dup4894_11:134230768-134231068	+	301	11	134201956	134244949	+	349	ENSG00000149328	0	0.971752	11	134017273	134242371	no_hmar
1613	12	537397	537705	AluY_dup30_12:537397-537705	+	309	12	518550	551083	+	200	ENSG00000120647	0	0.333333	12	164714	2120241	no_hmar
1614	12	751440	751692	AluSq2_dup21_12:751440-751692	-	253	12	674404	772664	-	6	ENSG00000171840	0	0.376667	12	164714	2120241	no_hmar
1615	12	827704	827998	AluY_dup57_12:827704-827998	+	295	12	862732	1017955	+	3883	ENSG00000060237	34735	0.820513	12	164714	2120241	no_hmar
1616	12	1058217	1058323	AluJb_dup103_12:1058217-1058323	-	107	12	1022560	1042224	-	226	ENSG00000002016	15994	0.0181964	12	164714	2120241	no_hmar
1617	12	1088932	1089172	AluY_dup75_12:1088932-1089172	+	241	12	1022560	1042224	-	226	ENSG00000002016	-46709	0.444445	12	164714	2120241	no_hmar
1618	12	1294091	1294374	AluSg4_dup6_12:1294091-1294374	-	284	12	1137070	1599393	+	1407	ENSG00000082805	0	0.976191	12	164714	2120241	no_hmar
1619	12	1582649	1582815	AluJo_dup74_12:1582649-1582815	+	167	12	1137070	1599393	+	1407	ENSG00000082805	0	0.333333	12	164714	2120241	no_hmar
1620	12	1694283	1694579	AluY_dup124_12:1694283-1694579	+	297	12	1675917	1703232	-	227	ENSG00000171823	0	0.662923	12	164714	2120241	no_hmar
1621	12	1784194	1784449	AluSx_dup157_12:1784194-1784449	+	256	12	1740521	1755415	+	0	ENSG00000111186	-28780	1	12	164714	2120241	no_hmar
1622	12	3026762	3027057	AluY_dup176_12:3026762-3027057	+	296	12	3000114	3049889	+	392	ENSG00000078246	0	0.569577	12	2190661	3993107	no_hmar
1623	12	3058890	3059196	AluSz_dup124_12:3058890-3059196	-	307	12	3000114	3049889	+	392	ENSG00000078246	9002	0.795193	12	2190661	3993107	no_hmar
1624	12	3185542	3185832	AluJb_dup244_12:3185542-3185832	+	291	12	3103933	3149641	+	218	ENSG00000197905	-35902	0.941422	12	2190661	3993107	no_hmar
1625	12	3236527	3236820	AluY_dup202_12:3236527-3236820	-	294	12	3310360	3392279	+	54	ENSG00000011105	-73541	0.541667	12	2190661	3993107	no_hmar
1626	12	4205856	4206165	AluSc8_dup32_12:4205856-4206165	+	310	12	4383207	4409172	+	0	ENSG00000118971	177043	0.833333	12	3999821	4331156	hmar
1627	12	4210189	4210486	AluY_dup262_12:4210189-4210486	+	298	12	4383207	4409172	+	0	ENSG00000118971	172722	0.514248	12	3999821	4331156	hmar
1628	12	4290845	4291133	AluYc_dup11_12:4290845-4291133	-	289	12	4383207	4409172	+	0	ENSG00000118971	-92075	0.949495	12	3999821	4331156	hmar
1629	12	4442461	4442622	AluSx_dup247_12:4442461-4442622	-	162	12	4430438	4461854	+	205	ENSG00000078237	0	0.985816	12	4393994	16784090	no_hmar
1630	12	4534064	4534365	AluSx_dup252_12:4534064-4534365	-	302	12	4537564	4554736	-	0	ENSG00000111241	-3200	0.954546	12	4393994	16784090	no_hmar
1631	12	5158165	5158477	AluYb8_dup4_12:5158165-5158477	+	313	12	5153314	5155152	+	0	ENSG00000130037	-3014	0.84375	12	4393994	16784090	no_hmar
1632	12	6177638	6177954	AluSz_dup175_12:6177638-6177954	-	317	12	6058184	6232362	-	17	ENSG00000110799	0	0.944469	12	4393994	16784090	no_hmar
1633	12	6580712	6581010	AluSx1_dup227_12:6580712-6581010	+	299	12	6572001	6579697	-	33	ENSG00000139190	-1016	0.2	12	4393994	16784090	no_hmar
1634	12	6810286	6810409	AluJo_dup216_12:6810286-6810409	-	124	12	6804205	6807227	-	5	ENSG00000139200	3060	0.452815	12	4393994	16784090	no_hmar
1635	12	6943818	6944119	AluSp_dup153_12:6943818-6944119	+	302	12	6937606	6948622	+	306	ENSG00000110811	0	0.666667	12	4393994	16784090	no_hmar
1636	12	7857771	7858069	AluSz6_dup146_12:7857771-7858069	+	299	12	7864167	7869670	+	0	ENSG00000187569	6099	0.962764	12	4393994	16784090	no_hmar
1637	12	7861175	7861476	AluSz_dup270_12:7861175-7861476	-	302	12	7864167	7869670	+	0	ENSG00000187569	-2692	0.555556	12	4393994	16784090	no_hmar
1638	12	7865045	7865341	AluSx3_dup98_12:7865045-7865341	-	297	12	7864167	7869670	+	0	ENSG00000187569	0	0.833333	12	4393994	16784090	no_hmar
1639	12	7922211	7922421	AluSx_dup465_12:7922211-7922421	-	211	12	7917882	7926444	+	0	ENSG00000205857	0	0.969697	12	4393994	16784090	no_hmar
1640	12	7924215	7924514	AluSx_dup466_12:7924215-7924514	-	300	12	7917882	7926444	+	0	ENSG00000205857	0	0.166667	12	4393994	16784090	no_hmar
1641	12	7979704	7979855	AluSp_dup200_12:7979704-7979855	-	152	12	7966915	8043723	-	0	ENSG00000173262	0	0.875	12	4393994	16784090	no_hmar
1642	12	8001454	8001747	AluSx1_dup309_12:8001454-8001747	-	294	12	7966915	8043723	-	0	ENSG00000173262	0	0.933333	12	4393994	16784090	no_hmar
1643	12	8014277	8014580	AluSx_dup492_12:8014277-8014580	+	304	12	7966915	8043723	-	0	ENSG00000173262	0	0.6	12	4393994	16784090	no_hmar
1644	12	8016953	8017232	AluSc8_dup79_12:8016953-8017232	-	280	12	7966915	8043723	-	0	ENSG00000173262	0	1	12	4393994	16784090	no_hmar
1645	12	8019607	8019905	AluY_dup500_12:8019607-8019905	+	299	12	7966915	8043723	-	0	ENSG00000173262	0	0.555556	12	4393994	16784090	no_hmar
1646	12	8066913	8067224	AluY_dup508_12:8066913-8067224	-	312	12	8074012	8088630	-	63	ENSG00000059804	-6789	0.943841	12	4393994	16784090	no_hmar
1647	12	8067881	8068192	AluSq2_dup209_12:8067881-8068192	+	312	12	8074012	8088630	-	63	ENSG00000059804	5821	0.852986	12	4393994	16784090	no_hmar
1648	12	8087769	8088061	AluSp_dup218_12:8087769-8088061	+	293	12	8074012	8088630	-	63	ENSG00000059804	0	0.772222	12	4393994	16784090	no_hmar
1649	12	8091460	8091744	AluYc_dup30_12:8091460-8091744	-	285	12	8074012	8088630	-	63	ENSG00000059804	2831	0.982143	12	4393994	16784090	no_hmar
1650	12	8105641	8105942	AluSx_dup514_12:8105641-8105942	+	302	12	8074012	8088630	-	63	ENSG00000059804	-17012	0.0833333	12	4393994	16784090	no_hmar
1651	12	8122836	8123144	AluSx1_dup327_12:8122836-8123144	-	309	12	8074012	8088630	-	63	ENSG00000059804	34207	0.0636486	12	4393994	16784090	no_hmar
1652	12	8145513	8145813	AluY_dup531_12:8145513-8145813	+	301	12	8192429	8205443	+	315	ENSG00000065970	46617	0.962614	12	4393994	16784090	no_hmar
1653	12	8183706	8183999	AluSx1_dup337_12:8183706-8183999	-	294	12	8192429	8205443	+	315	ENSG00000065970	-8431	0.972222	12	4393994	16784090	no_hmar
1654	12	8725712	8726050	AluSz6_dup179_12:8725712-8726050	-	339	12	8756881	8765363	-	0	ENSG00000111732	-30832	0.222222	12	4393994	16784090	no_hmar
1655	12	8835087	8835397	AluY_dup566_12:8835087-8835397	+	311	12	8850328	8930263	+	1	ENSG00000166532	14932	0.609756	12	4393994	16784090	no_hmar
1656	12	8924476	8924780	AluSx1_dup389_12:8924476-8924780	-	305	12	8850328	8930263	+	1	ENSG00000166532	0	0.416667	12	4393994	16784090	no_hmar
1657	12	8998162	8998489	AluY_dup576_12:8998162-8998489	+	328	12	8975248	9027604	+	1	ENSG00000166535	0	0.895014	12	4393994	16784090	no_hmar
1658	12	9088695	9088982	AluJb_dup622_12:9088695-9088982	+	288	12	9070274	9092480	+	190	ENSG00000111752	0	0.968254	12	4393994	16784090	no_hmar
1659	12	9282176	9282441	AluY_dup588_12:9282176-9282441	-	266	12	9220260	9268445	-	17	ENSG00000175899	13732	0.952381	12	4393994	16784090	no_hmar
1660	12	9410813	9411141	AluY_dup595_12:9410813-9411141	+	329	12	9301571	9360937	-	9	ENSG00000126838	-49877	0.705479	12	4393994	16784090	no_hmar
1661	12	9901663	9901970	AluSz_dup386_12:9901663-9901970	+	308	12	9906080	9913416	-	0	ENSG00000110848	4111	0.0528426	12	4393994	16784090	no_hmar
1662	12	10297369	10297671	AluY_dup638_12:10297369-10297671	+	303	12	10271060	10282681	-	0	ENSG00000172243	-14689	0.856307	12	4393994	16784090	no_hmar
1663	12	10330834	10331140	AluY_dup640_12:10330834-10331140	+	307	12	10332174	10342736	+	0	ENSG00000165685	1035	0.7	12	4393994	16784090	no_hmar
1664	12	10368689	10368980	AluSz_dup401_12:10368689-10368980	+	292	12	10365729	10374448	+	156	ENSG00000139112	0	0.959596	12	4393994	16784090	no_hmar
1665	12	10564004	10564205	AluY_dup657_12:10564004-10564205	+	202	12	10565174	10588585	-	0	ENSG00000255641	970	0.51925	12	4393994	16784090	no_hmar
1666	12	11674928	11675229	AluSc8_dup105_12:11674928-11675229	-	302	12	11506044	11548463	-	0	ENSG00000251655	126466	0.75	12	4393994	16784090	no_hmar
1667	12	11717380	11717660	AluJb_dup731_12:11717380-11717660	-	281	12	11803062	12044532	+	194	ENSG00000139083	-85403	0.19697	12	4393994	16784090	no_hmar
1668	12	12148443	12148733	AluY_dup722_12:12148443-12148733	+	291	12	12221065	12291886	+	16	ENSG00000121380	72333	0.583333	12	4393994	16784090	no_hmar
1669	12	12355197	12355503	AluJb_dup768_12:12355197-12355503	+	307	12	12274063	12419669	-	1131	ENSG00000070018	0	0.979299	12	4393994	16784090	no_hmar
1670	12	12364089	12364382	AluSx1_dup481_12:12364089-12364382	+	294	12	12274063	12419669	-	1131	ENSG00000070018	0	0.944504	12	4393994	16784090	no_hmar
1671	12	12413031	12413334	AluY_dup745_12:12413031-12413334	+	304	12	12274063	12419669	-	1131	ENSG00000070018	0	0.955942	12	4393994	16784090	no_hmar
1672	12	13036830	13037133	AluSx_dup823_12:13036830-13037133	+	304	12	13061184	13065470	+	895	ENSG00000013588	24052	0.897436	12	4393994	16784090	no_hmar
1673	12	13097936	13098238	AluSq2_dup355_12:13097936-13098238	-	303	12	13093712	13103318	-	29	ENSG00000111291	0	0.507936	12	4393994	16784090	no_hmar
1674	12	14374874	14375162	AluY_dup841_12:14374874-14375162	+	289	12	14538318	14651004	+	1477	ENSG00000171681	163157	0.766667	12	4393994	16784090	no_hmar
1675	12	14480165	14480479	AluY_dup861_12:14480165-14480479	+	315	12	14538318	14651004	+	1477	ENSG00000171681	57840	0.949713	12	4393994	16784090	no_hmar
1676	12	14817870	14818171	AluSg4_dup46_12:14817870-14818171	+	302	12	14766054	14849382	-	1	ENSG00000070019	0	0.833333	12	4393994	16784090	no_hmar
1677	12	15501411	15501734	AluYf4_dup10_12:15501411-15501734	+	324	12	15475661	15747972	+	0	ENSG00000151490	0	0.63141	12	4393994	16784090	no_hmar
1678	12	15505304	15505613	AluY_dup894_12:15505304-15505613	+	310	12	15475661	15747972	+	0	ENSG00000151490	0	0.266667	12	4393994	16784090	no_hmar
1679	12	16579605	16579921	AluY_dup935_12:16579605-16579921	+	317	12	16507187	16529095	+	473	ENSG00000008394	-50511	0.761905	12	4393994	16784090	no_hmar
1680	12	16707672	16707895	AluYk4_dup15_12:16707672-16707895	-	224	12	16704159	16758747	-	3	ENSG00000048540	0	0.964286	12	4393994	16784090	no_hmar
1681	12	16865837	16866147	AluY_dup940_12:16865837-16866147	-	311	12	16704159	16758747	-	3	ENSG00000048540	107091	0.909091	12	16792689	18613432	hmar
1682	12	16867160	16867456	AluY_dup941_12:16867160-16867456	-	297	12	16704159	16758747	-	3	ENSG00000048540	108414	0.973684	12	16792689	18613432	hmar
1683	12	17235417	17235720	AluSp_dup394_12:17235417-17235720	-	304	12	16704159	16758747	-	3	ENSG00000048540	476671	0.833333	12	16792689	18613432	hmar
1684	12	17259583	17259867	AluYc_dup59_12:17259583-17259867	-	285	12	16704159	16758747	-	3	ENSG00000048540	500837	0.974359	12	16792689	18613432	hmar
1685	12	18401225	18401505	AluY_dup985_12:18401225-18401505	+	281	12	18435016	18800959	+	0	ENSG00000139144	33512	1	12	16792689	18613432	hmar
1686	12	19445058	19445362	AluSz6_dup356_12:19445058-19445362	+	305	12	19282734	19522718	+	812	ENSG00000052126	0	0.983334	12	18678250	22892506	no_hmar
1687	12	19455844	19456121	AluSx_dup1005_12:19455844-19456121	-	278	12	19282734	19522718	+	812	ENSG00000052126	0	0.657658	12	18678250	22892506	no_hmar
1688	12	19478664	19478997	AluSp_dup416_12:19478664-19478997	+	334	12	19282734	19522718	+	812	ENSG00000052126	0	0.986111	12	18678250	22892506	no_hmar
1689	12	19518024	19518316	AluY_dup1010_12:19518024-19518316	+	293	12	19282734	19522718	+	812	ENSG00000052126	0	0.560913	12	18678250	22892506	no_hmar
1690	12	19547982	19548288	AluSg_dup292_12:19547982-19548288	-	307	12	19282734	19522718	+	812	ENSG00000052126	25265	0.980375	12	18678250	22892506	no_hmar
1691	12	19572582	19572861	AluSx_dup1031_12:19572582-19572861	+	280	12	19592634	19873618	+	400	ENSG00000139154	19774	0.965517	12	18678250	22892506	no_hmar
1692	12	19665615	19665908	AluSz6_dup371_12:19665615-19665908	+	294	12	19592634	19873618	+	400	ENSG00000139154	0	0.981481	12	18678250	22892506	no_hmar
1693	12	20469223	20469530	AluY_dup1058_12:20469223-20469530	-	308	12	20522219	20833202	+	5	ENSG00000172572	-52690	0.685572	12	18678250	22892506	no_hmar
1694	12	22189778	22190015	AluY_dup1125_12:22189778-22190015	+	238	12	22199238	22218242	+	229	ENSG00000111726	9224	0.970238	12	18678250	22892506	no_hmar
1695	12	22848212	22848508	AluSc_dup264_12:22848212-22848508	-	297	12	22778098	22837885	+	605	ENSG00000139163	10328	0.0833333	12	18678250	22892506	no_hmar
1696	12	23027351	23027670	AluY_dup1149_12:23027351-23027670	-	320	12	22778098	22837885	+	605	ENSG00000139163	189467	0.746667	12	22987780	25252858	hmar
1697	12	23563148	23563457	AluY_dup1158_12:23563148-23563457	+	310	12	23687156	24103810	-	0	ENSG00000134532	123700	0.744	12	22987780	25252858	hmar
1698	12	24678524	24678800	AluY_dup1194_12:24678524-24678800	+	277	12	24970945	25101866	-	0	ENSG00000060982	292146	0.808645	12	22987780	25252858	hmar
1699	12	25057137	25057436	AluSz6_dup434_12:25057137-25057436	-	300	12	24970945	25101866	-	0	ENSG00000060982	0	0.75	12	22987780	25252858	hmar
1700	12	25349808	25350106	AluSc8_dup192_12:25349808-25350106	+	299	12	25261485	25348012	-	21	ENSG00000118307	-1797	0.996	12	25266328	29875778	no_hmar
1701	12	25401119	25401396	AluSx1_dup824_12:25401119-25401396	+	278	12	25362732	25398318	-	359	ENSG00000133703	-2802	1	12	25266328	29875778	no_hmar
1702	12	25705271	25705509	AluYc3_dup10_12:25705271-25705509	+	239	12	25656697	25801485	-	2	ENSG00000152936	0	0.936314	12	25266328	29875778	no_hmar
1703	12	25879730	25880044	AluY_dup1244_12:25879730-25880044	+	315	12	25656697	25801485	-	2	ENSG00000152936	-78246	0.975757	12	25266328	29875778	no_hmar
1704	12	25944449	25944760	AluY_dup1247_12:25944449-25944760	-	312	12	25656697	25801485	-	2	ENSG00000152936	142965	0.283333	12	25266328	29875778	no_hmar
1705	12	26178209	26178513	AluY_dup1255_12:26178209-26178513	+	305	12	26208277	26232003	+	248	ENSG00000123094	29765	0.70934	12	25266328	29875778	no_hmar
1706	12	26615599	26615901	AluSx1_dup866_12:26615599-26615901	-	303	12	26492333	26985714	-	560	ENSG00000123104	0	0.65	12	25266328	29875778	no_hmar
1707	12	26964266	26964637	AluYf4_dup15_12:26964266-26964637	+	372	12	26492333	26985714	-	560	ENSG00000123104	0	0.938272	12	25266328	29875778	no_hmar
1708	12	27045675	27045977	AluSq2_dup528_12:27045675-27045977	+	303	12	27058433	27089736	-	669	ENSG00000064102	12457	0.680555	12	25266328	29875778	no_hmar
1709	12	27680871	27681179	AluSx_dup1292_12:27680871-27681179	-	309	12	27623565	27655051	+	12	ENSG00000165935	25821	0.963768	12	25266328	29875778	no_hmar
1710	12	27862752	27863047	AluSp_dup513_12:27862752-27863047	-	296	12	27863777	27908380	+	875	ENSG00000061794	-731	0.97619	12	25266328	29875778	no_hmar
1711	12	29781971	29782271	AluY_dup1352_12:29781971-29782271	+	301	12	29659782	29936684	-	36	ENSG00000133687	0	0.890351	12	25266328	29875778	no_hmar
1712	12	31001101	31001382	AluY_dup1403_12:31001101-31001382	-	282	12	31079886	31144847	+	4	ENSG00000110900	-78505	0.666667	12	30398201	33078784	no_hmar
1713	12	31328421	31328703	AluY_dup1416_12:31328421-31328703	+	283	12	31231119	31256964	+	793	ENSG00000013573	-71458	0.2	12	30398201	33078784	no_hmar
1714	12	31559750	31560033	AluSx_dup1393_12:31559750-31560033	-	284	12	31540540	31743766	-	656	ENSG00000170456	0	0.987879	12	30398201	33078784	no_hmar
1715	12	31640350	31640663	AluSx3_dup307_12:31640350-31640663	+	314	12	31540540	31743766	-	656	ENSG00000170456	0	0.988889	12	30398201	33078784	no_hmar
1716	12	31789888	31790166	AluSx1_dup1043_12:31789888-31790166	-	279	12	31814888	31820921	+	10	ENSG00000139160	-24723	0.880952	12	30398201	33078784	no_hmar
1717	12	31805861	31806160	AluSx3_dup313_12:31805861-31806160	+	300	12	31814888	31820921	+	10	ENSG00000139160	8729	0.777778	12	30398201	33078784	no_hmar
1718	12	32236221	32236520	AluY_dup1522_12:32236221-32236520	+	300	12	32260266	32530558	+	501	ENSG00000151746	23747	0.958334	12	30398201	33078784	no_hmar
1719	12	32270995	32271314	AluY_dup1527_12:32270995-32271314	-	320	12	32260266	32530558	+	501	ENSG00000151746	0	0.8125	12	30398201	33078784	no_hmar
1720	12	32431508	32431830	AluY_dup1534_12:32431508-32431830	+	323	12	32260266	32530558	+	501	ENSG00000151746	0	1	12	30398201	33078784	no_hmar
1721	12	32473978	32474279	AluSx_dup1527_12:32473978-32474279	+	302	12	32260266	32530558	+	501	ENSG00000151746	0	0.971429	12	30398201	33078784	no_hmar
1722	12	32542590	32542875	AluY_dup1546_12:32542590-32542875	+	286	12	32552728	32793464	+	213	ENSG00000139132	9854	0.222222	12	30398201	33078784	no_hmar
1723	12	32545450	32545745	AluSx_dup1531_12:32545450-32545745	-	296	12	32552728	32793464	+	213	ENSG00000139132	-6984	0.934395	12	30398201	33078784	no_hmar
1724	12	32568349	32568653	AluY_dup1551_12:32568349-32568653	-	305	12	32552728	32793464	+	213	ENSG00000139132	0	0.275	12	30398201	33078784	no_hmar
1725	12	32575223	32575497	AluY_dup1554_12:32575223-32575497	-	275	12	32552728	32793464	+	213	ENSG00000139132	0	0.805556	12	30398201	33078784	no_hmar
1726	12	32799623	32799918	AluY_dup1574_12:32799623-32799918	+	296	12	32552728	32793464	+	213	ENSG00000139132	-6160	0.940145	12	30398201	33078784	no_hmar
1727	12	32905258	32905287	AluYc_dup109_12:32905258-32905287	+	30	12	32900141	32908808	-	242	ENSG00000139131	0	0.777778	12	30398201	33078784	no_hmar
1728	12	33368657	33368937	AluY_dup1602_12:33368657-33368937	-	281	12	33529768	33592457	-	0	ENSG00000110975	-160832	0.733334	12	33090667	34113157	hmar
1729	12	33581560	33581859	AluY_dup1609_12:33581560-33581859	+	300	12	33529768	33592457	-	0	ENSG00000110975	0	0.760869	12	33090667	34113157	hmar
1730	12	33738272	33738558	AluY_dup1611_12:33738272-33738558	-	287	12	33529768	33592457	-	0	ENSG00000110975	145816	0.455135	12	33090667	34113157	hmar
1731	12	34192033	34192327	AluY_dup1624_12:34192033-34192327	+	295	12	34175535	34182568	+	69	ENSG00000139133	-9466	0.687406	12	34182776	34409543	no_hmar
1732	12	38530937	38531194	AluSz_dup1137_12:38530937-38531194	+	258	12	38710696	38717723	+	27	ENSG00000175548	179503	0.970503	12	37908243	54962504	no_hmar
1733	12	39274731	39275031	AluY_dup1668_12:39274731-39275031	+	301	12	39047687	39301182	-	345	ENSG00000139117	0	0.656309	12	37908243	54962504	no_hmar
1734	12	39445967	39446260	AluY_dup1676_12:39445967-39446260	+	294	12	39047687	39301182	-	345	ENSG00000139117	-144786	0.664828	12	37908243	54962504	no_hmar
1735	12	41020734	41021030	AluSq_dup232_12:41020734-41021030	+	297	12	40787250	40964445	+	5	ENSG00000205592	-56290	0.966667	12	37908243	54962504	no_hmar
1736	12	42041538	42041831	AluSc_dup418_12:42041538-42041831	+	294	12	41582258	41967689	+	0	ENSG00000165966	-73850	0.948718	12	37908243	54962504	no_hmar
1737	12	42885583	42885885	AluSq2_dup735_12:42885583-42885885	-	303	12	42853614	42866318	-	88	ENSG00000139174	19266	1	12	37908243	54962504	no_hmar
1738	12	42912987	42913296	AluSq2_dup739_12:42912987-42913296	-	310	12	42853614	42866318	-	88	ENSG00000139174	46670	1	12	37908243	54962504	no_hmar
1739	12	44137285	44137578	AluY_dup1818_12:44137285-44137578	+	294	12	44124182	44149048	-	310	ENSG00000129317	0	0.575758	12	37908243	54962504	no_hmar
1740	12	44169678	44169972	AluY_dup1819_12:44169678-44169972	-	295	12	44161915	44180515	+	45	ENSG00000198001	0	0.777778	12	37908243	54962504	no_hmar
1741	12	44971249	44971560	AluY_dup1842_12:44971249-44971560	-	312	12	44902720	45307619	-	8	ENSG00000184613	0	0.0833332	12	37908243	54962504	no_hmar
1742	12	44993972	44994091	AluY_dup1846_12:44993972-44994091	-	120	12	44902720	45307619	-	8	ENSG00000184613	0	1	12	37908243	54962504	no_hmar
1743	12	45166977	45167276	AluY_dup1848_12:45166977-45167276	+	300	12	44902720	45307619	-	8	ENSG00000184613	0	0.98192	12	37908243	54962504	no_hmar
1744	12	46012678	46012981	AluY_dup1873_12:46012678-46012981	-	304	12	46123620	46298858	+	1598	ENSG00000189079	-110640	0.979798	12	37908243	54962504	no_hmar
1745	12	46019432	46019766	AluJb_dup2090_12:46019432-46019766	+	335	12	46123620	46298858	+	1598	ENSG00000189079	103855	1	12	37908243	54962504	no_hmar
1746	12	46210861	46211149	AluJo_dup976_12:46210861-46211149	+	289	12	46123620	46298858	+	1598	ENSG00000189079	0	0.947475	12	37908243	54962504	no_hmar
1747	12	46385064	46385359	AluSz_dup1300_12:46385064-46385359	+	296	12	46315834	46367999	-	2442	ENSG00000139218	-17066	0.0548015	12	37908243	54962504	no_hmar
1748	12	46402704	46403019	AluJb_dup2138_12:46402704-46403019	-	316	12	46315834	46367999	-	2442	ENSG00000139218	34706	0.984848	12	37908243	54962504	no_hmar
1749	12	47633528	47633821	AluY_dup1926_12:47633528-47633821	+	294	12	47628847	47630142	+	3	ENSG00000179715	-3387	0.97619	12	37908243	54962504	no_hmar
1750	12	48470420	48470727	AluSc_dup485_12:48470420-48470727	-	308	12	48439108	48499236	-	326	ENSG00000079387	0	0.777778	12	37908243	54962504	no_hmar
1751	12	48473001	48473297	AluSc8_dup329_12:48473001-48473297	+	297	12	48439108	48499236	-	326	ENSG00000079387	0	0.975904	12	37908243	54962504	no_hmar
1752	12	48529686	48529969	AluY_dup1962_12:48529686-48529969	-	284	12	48499830	48539488	+	1462	ENSG00000152556	0	0.98077	12	37908243	54962504	no_hmar
1753	12	49095001	49095180	AluSx_dup1943_12:49095001-49095180	-	180	12	49086819	49110458	-	904	ENSG00000129315	0	0.444444	12	37908243	54962504	no_hmar
1754	12	49109237	49109545	AluSq_dup271_12:49109237-49109545	-	309	12	49086819	49110458	-	904	ENSG00000129315	0	0.488943	12	37908243	54962504	no_hmar
1755	12	49195768	49196072	AluSq2_dup833_12:49195768-49196072	-	305	12	49208331	49222552	+	132	ENSG00000167535	-12260	0.913448	12	37908243	54962504	no_hmar
1756	12	49384022	49384287	AluSz_dup1383_12:49384022-49384287	+	266	12	49390526	49393070	-	95	ENSG00000181418	6240	0.333333	12	37908243	54962504	no_hmar
1757	12	49455646	49455940	AluSx3_dup448_12:49455646-49455940	-	295	12	49458889	49463568	-	19	ENSG00000167550	-2950	1	12	37908243	54962504	no_hmar
1758	12	49484498	49484783	AluSx_dup2008_12:49484498-49484783	-	286	12	49483645	49488295	-	5	ENSG00000139549	0	0.877778	12	37908243	54962504	no_hmar
1759	12	49516875	49517165	AluY_dup2028_12:49516875-49517165	+	291	12	49521744	49525083	-	8028	ENSG00000123416	4580	0.975	12	37908243	54962504	no_hmar
1760	12	49517173	49517482	AluY_dup2029_12:49517173-49517482	+	310	12	49521744	49525083	-	8028	ENSG00000123416	4263	0.666667	12	37908243	54962504	no_hmar
1761	12	49586680	49586978	AluSx1_dup1515_12:49586680-49586978	-	299	12	49578796	49582762	-	448	ENSG00000167552	3919	0.333333	12	37908243	54962504	no_hmar
1762	12	49683443	49683727	AluSx_dup2054_12:49683443-49683727	+	285	12	49688984	49692133	+	17	ENSG00000135406	5258	0.981491	12	37908243	54962504	no_hmar
1763	12	49685806	49686113	AluY_dup2052_12:49685806-49686113	+	308	12	49688984	49692133	+	17	ENSG00000135406	2872	0.922619	12	37908243	54962504	no_hmar
1764	12	50071947	50072237	AluSg_dup627_12:50071947-50072237	-	291	12	50039601	50100963	-	54	ENSG00000161791	0	0.888889	12	37908243	54962504	no_hmar
1765	12	50159419	50159714	AluSx1_dup1567_12:50159419-50159714	+	296	12	50135920	50156676	+	1085	ENSG00000139644	-2744	0.968254	12	37908243	54962504	no_hmar
1766	12	50180560	50180868	AluSc_dup526_12:50180560-50180868	-	309	12	50185625	50197827	-	324	ENSG00000167566	-4758	0.981481	12	37908243	54962504	no_hmar
1767	12	50423208	50423367	AluSx_dup2139_12:50423208-50423367	+	160	12	50370736	50412334	-	1256	ENSG00000161800	-10875	0.986111	12	37908243	54962504	no_hmar
1768	12	50567933	50568227	AluSp_dup851_12:50567933-50568227	-	295	12	50570850	50642534	-	2023	ENSG00000050405	-2624	0.983333	12	37908243	54962504	no_hmar
1769	12	50605145	50605456	AluJr_dup1241_12:50605145-50605456	+	312	12	50570850	50642534	-	2023	ENSG00000050405	0	0.951412	12	37908243	54962504	no_hmar
1770	12	50786713	50787005	AluY_dup2155_12:50786713-50787005	-	293	12	50721031	50790267	-	5	ENSG00000185958	0	0.8	12	37908243	54962504	no_hmar
1771	12	50821777	50822110	AluSz_dup1513_12:50821777-50822110	-	334	12	50794794	50869644	+	1136	ENSG00000161813	0	0.93997	12	37908243	54962504	no_hmar
1772	12	50918859	50919158	AluY_dup2171_12:50918859-50919158	+	300	12	50898924	51138619	+	1229	ENSG00000066084	0	0.984849	12	37908243	54962504	no_hmar
1773	12	50996666	50996959	AluY_dup2185_12:50996666-50996959	+	294	12	50898924	51138619	+	1229	ENSG00000066084	0	0.444444	12	37908243	54962504	no_hmar
1774	12	51156727	51157027	AluSp_dup888_12:51156727-51157027	-	301	12	51173929	51213559	+	279	ENSG00000123268	-16903	0.25	12	37908243	54962504	no_hmar
1775	12	51324366	51324664	AluSp_dup893_12:51324366-51324664	-	299	12	51318822	51323930	+	12	ENSG00000185432	437	1	12	37908243	54962504	no_hmar
1776	12	51429592	51429901	AluSx1_dup1684_12:51429592-51429901	+	310	12	51375512	51422008	-	241	ENSG00000110911	-7585	0.437909	12	37908243	54962504	no_hmar
1777	12	51563001	51563300	AluSx_dup2340_12:51563001-51563300	+	300	12	51489027	51566205	-	719	ENSG00000135457	0	0.969697	12	37908243	54962504	no_hmar
1778	12	51711491	51711800	AluYk4_dup34_12:51711491-51711800	+	310	12	51675286	51718299	-	2	ENSG00000110934	0	0.933549	12	37908243	54962504	no_hmar
1779	12	51741342	51741651	AluY_dup2252_12:51741342-51741651	+	310	12	51722364	51740422	-	0	ENSG00000139610	-921	0.578217	12	37908243	54962504	no_hmar
1780	12	51820711	51821021	AluY_dup2253_12:51820711-51821021	-	311	12	51796945	51901219	+	38	ENSG00000050438	0	0.860606	12	37908243	54962504	no_hmar
1781	12	51844988	51845192	AluY_dup2256_12:51844988-51845192	-	205	12	51796945	51901219	+	38	ENSG00000050438	0	0.754663	12	37908243	54962504	no_hmar
1782	12	51892383	51892683	AluSx1_dup1730_12:51892383-51892683	+	301	12	51796945	51901219	+	38	ENSG00000050438	0	0.9801	12	37908243	54962504	no_hmar
1783	12	51894470	51894912	AluYf4_dup30_12:51894470-51894912	-	443	12	51796945	51901219	+	38	ENSG00000050438	0	0.888889	12	37908243	54962504	no_hmar
1784	12	51896997	51897294	AluY_dup2261_12:51896997-51897294	-	298	12	51796945	51901219	+	38	ENSG00000050438	0	0.444444	12	37908243	54962504	no_hmar
1785	12	52281347	52281502	AluJb_dup2694_12:52281347-52281502	-	156	12	52281971	52285121	+	2	ENSG00000167612	-470	0.966667	12	37908243	54962504	no_hmar
1786	12	53107751	53107911	FRAM_dup187_12:53107751-53107911	-	161	12	53084952	53097218	-	0	ENSG00000189182	10534	0.975	12	37908243	54962504	no_hmar
1787	12	53399537	53399831	AluSq2_dup1010_12:53399537-53399831	+	295	12	53400268	53434004	+	7862	ENSG00000063046	438	0.00775193	12	37908243	54962504	no_hmar
1788	12	53660524	53660836	AluY_dup2339_12:53660524-53660836	-	313	12	53662551	53687255	+	1357	ENSG00000135476	-1716	0.983333	12	37908243	54962504	no_hmar
1789	12	53705831	53706013	AluSq_dup355_12:53705831-53706013	+	183	12	53701274	53715249	-	625	ENSG00000094914	0	0.916667	12	37908243	54962504	no_hmar
1790	12	53745072	53745378	AluSp_dup992_12:53745072-53745378	-	307	12	53721933	53729430	-	0	ENSG00000170374	15643	0.944444	12	37908243	54962504	no_hmar
1791	12	53762803	53763126	AluY_dup2356_12:53762803-53763126	-	324	12	53774076	53805021	+	2071	ENSG00000185591	-10951	0.795904	12	37908243	54962504	no_hmar
1792	12	53778489	53778786	AluSz6_dup902_12:53778489-53778786	+	298	12	53774076	53805021	+	2071	ENSG00000185591	0	1	12	37908243	54962504	no_hmar
1793	12	53815725	53815811	AluY_dup2376_12:53815725-53815811	+	87	12	53817719	53825254	+	0	ENSG00000135409	1909	0.761905	12	37908243	54962504	no_hmar
1794	12	53976360	53976667	AluY_dup2397_12:53976360-53976667	-	308	12	53900645	53994784	-	0	ENSG00000267281	0	1	12	37908243	54962504	no_hmar
1795	12	54193872	54194180	AluSx1_dup1872_12:54193872-54194180	+	309	12	54105731	54119026	-	339	ENSG00000012822	-74847	0.807408	12	37908243	54962504	no_hmar
1796	12	54614243	54614489	AluSz_dup1756_12:54614243-54614489	+	247	12	54635542	54651434	-	770	ENSG00000094916	21054	0.945694	12	37908243	54962504	no_hmar
1797	12	54717717	54718004	AluY_dup2440_12:54717717-54718004	-	288	12	54718948	54744304	+	457	ENSG00000111481	-945	0.2	12	37908243	54962504	no_hmar
1798	12	54719594	54719904	AluSz_dup1767_12:54719594-54719904	-	311	12	54718948	54744304	+	457	ENSG00000111481	0	0.0156863	12	37908243	54962504	no_hmar
1799	12	55151095	55151406	AluSc_dup619_12:55151095-55151406	-	312	12	55233189	55252023	+	0	ENSG00000172551	-81784	0.8375	12	55023333	56039859	hmar
1800	12	55562749	55563046	AluSz_dup1786_12:55562749-55563046	-	298	12	55523553	55524557	+	0	ENSG00000170605	38193	0.488889	12	55023333	56039859	hmar
1801	12	56057922	56058227	AluY_dup2479_12:56057922-56058227	-	306	12	56075539	56077830	+	84	ENSG00000170439	-17313	0.98	12	56047444	66877732	no_hmar
1802	12	56127285	56127579	AluSg_dup800_12:56127285-56127579	+	295	12	56119348	56122125	-	871	ENSG00000135404	-5161	0.980603	12	56047444	66877732	no_hmar
1803	12	56147272	56147583	AluSz_dup1799_12:56147272-56147583	+	312	12	56137101	56143663	+	58	ENSG00000135414	-3610	0.905039	12	56047444	66877732	no_hmar
1804	12	56201305	56201616	AluY_dup2489_12:56201305-56201616	+	312	12	56151299	56211485	-	2	ENSG00000205323	0	0.897778	12	56047444	66877732	no_hmar
1805	12	56252833	56253152	AluY_dup2494_12:56252833-56253152	-	320	12	56230823	56236614	-	16	ENSG00000123342	16220	0.967742	12	56047444	66877732	no_hmar
1806	12	56377825	56377969	AluSg7_dup171_12:56377825-56377969	-	145	12	56379495	56386348	+	256	ENSG00000111540	-1527	0.955841	12	56047444	66877732	no_hmar
1807	12	56394553	56394867	AluY_dup2506_12:56394553-56394867	-	315	12	56396006	56398808	+	161	ENSG00000139531	-1140	1	12	56047444	66877732	no_hmar
1808	12	56653139	56653434	AluSq2_dup1127_12:56653139-56653434	-	296	12	56636929	56652053	-	602	ENSG00000139645	1087	0.925926	12	56047444	66877732	no_hmar
1809	12	56653462	56653769	AluY_dup2537_12:56653462-56653769	+	308	12	56636929	56652053	-	602	ENSG00000139645	-1410	0.977778	12	56047444	66877732	no_hmar
1810	12	57076987	57077285	AluSp_dup1145_12:57076987-57077285	+	299	12	57058266	57081783	-	3445	ENSG00000110958	0	1	12	56047444	66877732	no_hmar
1811	12	57079175	57079482	AluY_dup2595_12:57079175-57079482	-	308	12	57058266	57081783	-	3445	ENSG00000110958	0	0.8	12	56047444	66877732	no_hmar
1812	12	57120851	57121085	AluSx1_dup2032_12:57120851-57121085	-	235	12	57106325	57118305	-	6064	ENSG00000196531	2547	0.956521	12	56047444	66877732	no_hmar
1813	12	57211181	57211474	AluY_dup2614_12:57211181-57211474	-	294	12	57167637	57181123	+	6	ENSG00000025423	30059	0.952097	12	56047444	66877732	no_hmar
1814	12	57445914	57446218	AluSq2_dup1171_12:57445914-57446218	+	305	12	57422542	57442107	-	14	ENSG00000166866	-3808	0.966667	12	56047444	66877732	no_hmar
1815	12	57617900	57618197	AluSx_dup2939_12:57617900-57618197	-	298	12	57610753	57619527	+	119	ENSG00000182379	0	0.6	12	56047444	66877732	no_hmar
1816	12	57847488	57847798	AluY_dup2651_12:57847488-57847798	+	311	12	57848720	57850628	+	4	ENSG00000139269	923	0.972222	12	56047444	66877732	no_hmar
1817	12	57880766	57881058	AluSq2_dup1192_12:57880766-57881058	-	293	12	57866303	57882404	-	0	ENSG00000123329	0	0.4	12	56047444	66877732	no_hmar
1818	12	57964189	57964467	AluSx_dup2995_12:57964189-57964467	-	279	12	57944055	57976959	+	130	ENSG00000155980	0	0.583333	12	56047444	66877732	no_hmar
1819	12	58090298	58090601	AluSx1_dup2107_12:58090298-58090601	+	304	12	58087945	58114689	+	1051	ENSG00000135506	0	0.5	12	56047444	66877732	no_hmar
1820	12	58682289	58682589	AluY_dup2683_12:58682289-58682589	-	301	12	58335485	58350670	+	1	ENSG00000166896	331620	0.888889	12	56047444	66877732	no_hmar
1821	12	59603724	59603970	AluJo_dup1521_12:59603724-59603970	-	247	12	59266357	59314016	-	201	ENSG00000139263	289709	1	12	56047444	66877732	no_hmar
1822	12	59675973	59676262	AluSx_dup3058_12:59675973-59676262	+	290	12	59917188	59917692	-	0	ENSG00000257230	240927	1	12	56047444	66877732	no_hmar
1823	12	60361643	60361958	AluY_dup2720_12:60361643-60361958	-	316	12	60098583	60173457	+	81	ENSG00000118596	188187	0.951638	12	56047444	66877732	no_hmar
1824	12	61865571	61865880	AluYa5_dup83_12:61865571-61865880	-	310	12	62104158	62652545	-	5	ENSG00000198673	-238279	0.88586	12	56047444	66877732	no_hmar
1825	12	61887916	61888223	AluSx1_dup2161_12:61887916-61888223	+	308	12	62104158	62652545	-	5	ENSG00000198673	215936	0.952381	12	56047444	66877732	no_hmar
1826	12	62258301	62258575	AluY_dup2763_12:62258301-62258575	+	275	12	62104158	62652545	-	5	ENSG00000198673	0	0.5	12	56047444	66877732	no_hmar
1827	12	62614607	62614914	AluY_dup2773_12:62614607-62614914	+	308	12	62104158	62652545	-	5	ENSG00000198673	0	0.991667	12	56047444	66877732	no_hmar
1828	12	62680437	62680733	AluSp_dup1227_12:62680437-62680733	+	297	12	62654196	62810979	+	874	ENSG00000135655	0	1	12	56047444	66877732	no_hmar
1829	12	63141877	63142044	AluYc_dup186_12:63141877-63142044	+	168	12	63042272	63328516	-	121	ENSG00000111110	0	0.939394	12	56047444	66877732	no_hmar
1830	12	64267992	64268282	AluY_dup2820_12:64267992-64268282	-	291	12	64238597	64536449	+	1075	ENSG00000196935	0	0.640625	12	56047444	66877732	no_hmar
1831	12	64650637	64650807	AluY_dup2834_12:64650637-64650807	+	171	12	64660966	64784345	-	3	ENSG00000185306	10160	0.899225	12	56047444	66877732	no_hmar
1832	12	64651282	64651589	AluSz_dup2093_12:64651282-64651589	-	308	12	64660966	64784345	-	3	ENSG00000185306	-9378	0.962264	12	56047444	66877732	no_hmar
1833	12	64773583	64773914	AluY_dup2837_12:64773583-64773914	+	332	12	64660966	64784345	-	3	ENSG00000185306	0	0.968972	12	56047444	66877732	no_hmar
1834	12	64783293	64783576	AluSx_dup3187_12:64783293-64783576	-	284	12	64660966	64784345	-	3	ENSG00000185306	0	0.975	12	56047444	66877732	no_hmar
1835	12	64848453	64848756	AluY_dup2841_12:64848453-64848756	-	304	12	64849651	64895158	+	768	ENSG00000183735	-896	0.843264	12	56047444	66877732	no_hmar
1836	12	64984975	64985266	AluSx3_dup686_12:64984975-64985266	+	292	12	65004413	65088689	+	584	ENSG00000153179	19148	0.222222	12	56047444	66877732	no_hmar
1837	12	65062461	65062748	AluYc_dup193_12:65062461-65062748	-	288	12	65004413	65088689	+	584	ENSG00000153179	0	0.466667	12	56047444	66877732	no_hmar
1838	12	65115805	65116097	AluSq2_dup1292_12:65115805-65116097	-	293	12	65110524	65153056	-	665	ENSG00000135677	0	0.9692	12	56047444	66877732	no_hmar
1839	12	66145741	66146035	AluSz_dup2175_12:66145741-66146035	-	295	12	66219051	66357069	+	534	ENSG00000149948	-73017	0.954167	12	56047444	66877732	no_hmar
1840	12	66281954	66282263	AluSz_dup2180_12:66281954-66282263	+	310	12	66219051	66357069	+	534	ENSG00000149948	0	0.986395	12	56047444	66877732	no_hmar
1841	12	66582320	66582631	AluJr_dup1742_12:66582320-66582631	+	312	12	66583080	66641948	+	3	ENSG00000090376	450	0.811309	12	56047444	66877732	no_hmar
1842	12	66642951	66643243	AluY_dup2917_12:66642951-66643243	-	293	12	66583080	66641948	+	3	ENSG00000090376	1004	0.5625	12	56047444	66877732	no_hmar
1843	12	68597922	68598222	AluY_dup2970_12:68597922-68598222	-	301	12	68595628	68619536	-	0	ENSG00000111536	0	0.903704	12	67679880	96941056	no_hmar
1844	12	68810819	68811063	AluJb_dup3708_12:68810819-68811063	+	245	12	68674506	68726025	-	219	ENSG00000111554	-84795	0.98	12	67679880	96941056	no_hmar
1845	12	69213270	69213574	AluSp_dup1331_12:69213270-69213574	-	305	12	69202258	69233626	+	2222	ENSG00000135679	0	0.980952	12	67679880	96941056	no_hmar
1846	12	70008971	70009272	AluSx_dup3445_12:70008971-70009272	+	302	12	70003788	70004618	-	0	ENSG00000198812	-4354	0.566667	12	67679880	96941056	no_hmar
1847	12	71711696	71711972	AluSg_dup1015_12:71711696-71711972	+	277	12	71833861	71978511	+	0	ENSG00000139292	121890	0.47125	12	67679880	96941056	no_hmar
1848	12	71925366	71925661	AluSz_dup2367_12:71925366-71925661	+	296	12	71833861	71978511	+	0	ENSG00000139292	0	1	12	67679880	96941056	no_hmar
1849	12	72079233	72079542	AluSx_dup3506_12:72079233-72079542	+	310	12	72067984	72083427	+	0	ENSG00000258064	0	0.0617284	12	67679880	96941056	no_hmar
1850	12	72958436	72958733	AluY_dup3140_12:72958436-72958733	-	298	12	72666559	73056972	+	33	ENSG00000072657	0	0.598246	12	67679880	96941056	no_hmar
1851	12	74409270	74409478	AluSx_dup3547_12:74409270-74409478	+	209	12	74931893	74932183	+	148	ENSG00000253719	522416	0.952381	12	67679880	96941056	no_hmar
1852	12	74635631	74635933	AluY_dup3181_12:74635631-74635933	+	303	12	74931893	74932183	+	148	ENSG00000253719	295961	0.827586	12	67679880	96941056	no_hmar
1853	12	74947014	74947319	AluY_dup3191_12:74947014-74947319	+	306	12	74931893	74932183	+	148	ENSG00000253719	-14832	0.952381	12	67679880	96941056	no_hmar
1854	12	75002788	75003088	AluJb_dup3959_12:75002788-75003088	-	301	12	74931893	74932183	+	148	ENSG00000253719	70606	0.848148	12	67679880	96941056	no_hmar
1855	12	75508637	75508942	AluYf4_dup42_12:75508637-75508942	-	306	12	75434880	75601763	-	0	ENSG00000166006	0	0.973447	12	67679880	96941056	no_hmar
1856	12	75847032	75847340	AluSx1_dup2566_12:75847032-75847340	-	309	12	75784897	75824938	+	2	ENSG00000180481	22095	1	12	67679880	96941056	no_hmar
1857	12	75949260	75949566	AluSg_dup1045_12:75949260-75949566	-	307	12	75893592	75905377	-	2166	ENSG00000111615	43884	0.974359	12	67679880	96941056	no_hmar
1858	12	76325499	76325795	AluSg_dup1049_12:76325499-76325795	+	297	12	76424319	76425521	-	3845	ENSG00000139289	98525	0.979167	12	67679880	96941056	no_hmar
1859	12	76350209	76350512	AluSx1_dup2583_12:76350209-76350512	-	304	12	76424319	76425521	-	3845	ENSG00000139289	-73808	0.423333	12	67679880	96941056	no_hmar
1860	12	76386214	76386511	AluSx_dup3598_12:76386214-76386511	-	298	12	76424319	76425521	-	3845	ENSG00000139289	-37809	0.416667	12	67679880	96941056	no_hmar
1861	12	76406857	76407166	AluJo_dup1845_12:76406857-76407166	+	310	12	76424319	76425521	-	3845	ENSG00000139289	17154	0.96875	12	67679880	96941056	no_hmar
1862	12	76492594	76492889	AluSg_dup1051_12:76492594-76492889	-	296	12	76442212	76467999	-	6926	ENSG00000187109	24596	0.9875	12	67679880	96941056	no_hmar
1863	12	77355558	77355832	AluY_dup3268_12:77355558-77355832	-	275	12	77417798	77458415	-	719	ENSG00000165891	-61967	1	12	67679880	96941056	no_hmar
1864	12	80736659	80736952	AluSc8_dup569_12:80736659-80736952	-	294	12	80603239	80771825	+	0	ENSG00000165899	0	0.259259	12	67679880	96941056	no_hmar
1865	12	80766474	80766742	AluSz_dup2548_12:80766474-80766742	-	269	12	80603239	80771825	+	0	ENSG00000165899	0	0.958333	12	67679880	96941056	no_hmar
1866	12	81384171	81384464	AluSq_dup524_12:81384171-81384464	+	294	12	81205247	81331501	-	14	ENSG00000111052	-52671	0.986515	12	67679880	96941056	no_hmar
1867	12	83616824	83617134	AluY_dup3450_12:83616824-83617134	+	311	12	83081366	83526165	+	133	ENSG00000179104	-90660	0.73386	12	67679880	96941056	no_hmar
1868	12	86061789	86062092	AluY_dup3517_12:86061789-86062092	-	304	12	86198483	86229979	-	0	ENSG00000198774	-136392	0.583333	12	67679880	96941056	no_hmar
1869	12	86669598	86669919	AluY_dup3543_12:86669598-86669919	+	322	12	86373070	86421962	-	0	ENSG00000182050	-247637	0.978253	12	67679880	96941056	no_hmar
1870	12	86701469	86701780	AluY_dup3545_12:86701469-86701780	-	312	12	86373070	86421962	-	0	ENSG00000182050	279508	0.75	12	67679880	96941056	no_hmar
1871	12	87011252	87011492	AluY_dup3558_12:87011252-87011492	+	241	12	86373070	86421962	-	0	ENSG00000182050	-589291	0.466667	12	67679880	96941056	no_hmar
1872	12	87528821	87529174	AluY_dup3569_12:87528821-87529174	-	354	12	88374111	88422897	-	2	ENSG00000165805	-844938	0.977273	12	67679880	96941056	no_hmar
1873	12	87604667	87604978	AluY_dup3571_12:87604667-87604978	-	312	12	88374111	88422897	-	2	ENSG00000165805	-769134	1	12	67679880	96941056	no_hmar
1874	12	87781269	87781579	AluY_dup3580_12:87781269-87781579	+	311	12	88374111	88422897	-	2	ENSG00000165805	592533	0.961749	12	67679880	96941056	no_hmar
1875	12	88150223	88150532	AluY_dup3588_12:88150223-88150532	+	310	12	88374111	88422897	-	2	ENSG00000165805	223580	0.84844	12	67679880	96941056	no_hmar
1876	12	88647974	88648287	AluSq2_dup1574_12:88647974-88648287	-	314	12	88542093	88589423	+	855	ENSG00000139324	58552	0.944444	12	67679880	96941056	no_hmar
1877	12	88901682	88901976	AluSx_dup3874_12:88901682-88901976	+	295	12	88898976	88974055	-	4073	ENSG00000049130	0	0.897436	12	67679880	96941056	no_hmar
1878	12	89410745	89411034	AluSx_dup3880_12:89410745-89411034	-	290	12	89743034	89745816	-	696	ENSG00000139318	-332001	0.0889057	12	67679880	96941056	no_hmar
1879	12	90939712	90940028	AluY_dup3659_12:90939712-90940028	+	317	12	91347302	91348519	-	0	ENSG00000197651	407275	0.982142	12	67679880	96941056	no_hmar
1880	12	91105698	91106024	AluY_dup3663_12:91105698-91106024	-	327	12	91347302	91348519	-	0	ENSG00000197651	-241279	0.701149	12	67679880	96941056	no_hmar
1881	12	91675191	91675510	AluY_dup3681_12:91675191-91675510	-	320	12	91539505	91572329	-	1	ENSG00000011465	102863	0.951905	12	67679880	96941056	no_hmar
1882	12	92085876	92086173	AluSx3_dup864_12:92085876-92086173	-	298	12	92380405	92387179	-	3	ENSG00000257242	-294233	0.977097	12	67679880	96941056	no_hmar
1883	12	92416268	92416575	AluY_dup3700_12:92416268-92416575	+	308	12	92380405	92387179	-	3	ENSG00000257242	-29090	0.666667	12	67679880	96941056	no_hmar
1884	12	92584568	92584878	AluSq2_dup1604_12:92584568-92584878	+	311	12	92537859	92539311	-	242	ENSG00000133639	-45258	0.466667	12	67679880	96941056	no_hmar
1885	12	92936662	92936971	AluY_dup3724_12:92936662-92936971	-	310	12	92814789	92821922	-	0	ENSG00000205057	114741	0.988889	12	67679880	96941056	no_hmar
1886	12	93218917	93219252	AluYk4_dup56_12:93218917-93219252	+	336	12	93169790	93322842	-	916	ENSG00000102189	0	0.897058	12	67679880	96941056	no_hmar
1887	12	93962659	93962937	AluSx1_dup2985_12:93962659-93962937	+	279	12	93966674	93968952	+	60	ENSG00000120833	3738	0.933333	12	67679880	96941056	no_hmar
1888	12	94408382	94408684	AluY_dup3773_12:94408382-94408684	-	303	12	94072551	94287890	+	50	ENSG00000169372	120493	1	12	67679880	96941056	no_hmar
1889	12	94494638	94494949	AluSz_dup2803_12:94494638-94494949	-	312	12	94542748	94699058	+	42	ENSG00000136040	-47800	0.791667	12	67679880	96941056	no_hmar
1890	12	94651713	94651926	AluJb_dup4597_12:94651713-94651926	+	214	12	94542748	94699058	+	42	ENSG00000136040	0	0.950943	12	67679880	96941056	no_hmar
1891	12	94843251	94843582	AluJo_dup2130_12:94843251-94843582	+	332	12	94702592	94806266	-	516	ENSG00000173588	-36986	0.222222	12	67679880	96941056	no_hmar
1892	12	95064355	95064655	AluSx_dup4092_12:95064355-95064655	-	301	12	94965214	95044206	-	66	ENSG00000057704	20150	0.754386	12	67679880	96941056	no_hmar
1893	12	95333337	95333643	AluSx1_dup3060_12:95333337-95333643	-	307	12	95322029	95397456	-	282	ENSG00000184752	0	0.50974	12	67679880	96941056	no_hmar
1894	12	95337839	95338155	AluYb8_dup83_12:95337839-95338155	-	317	12	95322029	95397456	-	282	ENSG00000184752	0	0.89125	12	67679880	96941056	no_hmar
1895	12	95814478	95814777	AluSp_dup1627_12:95814478-95814777	+	300	12	95770993	95774672	-	0	ENSG00000258247	-39807	0.970683	12	67679880	96941056	no_hmar
1896	12	95913534	95913812	AluSz_dup2923_12:95913534-95913812	+	279	12	95911933	95928032	-	3	ENSG00000136014	0	0.979167	12	67679880	96941056	no_hmar
1897	12	96289248	96289554	AluSq2_dup1699_12:96289248-96289554	+	307	12	96252852	96297277	+	1027	ENSG00000139343	0	0.981132	12	67679880	96941056	no_hmar
1898	12	96504107	96504347	AluY_dup3865_12:96504107-96504347	-	241	12	96394770	96437153	-	1799	ENSG00000111144	66955	0.933333	12	67679880	96941056	no_hmar
1899	12	96783932	96784190	AluSx_dup4244_12:96783932-96784190	-	259	12	96674023	96728840	-	353	ENSG00000059758	55093	0.933333	12	67679880	96941056	no_hmar
1900	12	96788661	96788951	AluSg_dup1268_12:96788661-96788951	-	291	12	96674023	96728840	-	353	ENSG00000059758	59822	0.982456	12	67679880	96941056	no_hmar
1901	12	96874748	96875050	AluSc_dup1031_12:96874748-96875050	-	303	12	96883388	97254713	+	19	ENSG00000188596	-8339	0.989418	12	67679880	96941056	no_hmar
1902	12	96889094	96889397	AluSz6_dup1481_12:96889094-96889397	-	304	12	96883388	97254713	+	19	ENSG00000188596	0	0.96151	12	67679880	96941056	no_hmar
1903	12	98893440	98893722	AluSz_dup3044_12:98893440-98893722	+	283	12	98880884	98897610	-	0	ENSG00000245017	0	0.935897	12	98643872	99146129	no_hmar
1904	12	99006002	99006306	AluSx1_dup3236_12:99006002-99006306	-	305	12	99007366	99038479	-	270	ENSG00000166130	-1061	0.977778	12	98643872	99146129	no_hmar
1905	12	99037591	99037853	AluSx1_dup3241_12:99037591-99037853	-	263	12	99007366	99038479	-	270	ENSG00000166130	0	0.0178571	12	98643872	99146129	no_hmar
1906	12	99444458	99444773	AluY_dup3953_12:99444458-99444773	-	316	12	99129341	100378015	-	5	ENSG00000185046	0	0.781145	12	99152651	100349195	hmar
1907	12	100518828	100519134	AluSx_dup4398_12:100518828-100519134	+	307	12	100422335	100536413	-	1034	ENSG00000111647	0	0.967213	12	100352931	102731549	no_hmar
1908	12	100593859	100594136	AluSx1_dup3283_12:100593859-100594136	-	278	12	100592905	100617690	+	225	ENSG00000075089	0	0.0178078	12	100352931	102731549	no_hmar
1909	12	100639050	100639342	AluSx1_dup3288_12:100639050-100639342	-	293	12	100646258	100660854	-	42	ENSG00000166153	-6917	0.666667	12	100352931	102731549	no_hmar
1910	12	100804289	100804454	AluSx_dup4419_12:100804289-100804454	+	166	12	100751170	100813934	+	0	ENSG00000179520	0	0.895117	12	100352931	102731549	no_hmar
1911	12	101060953	101061278	AluSx4_dup175_12:101060953-101061278	-	326	12	100988683	101018665	+	517	ENSG00000139354	42289	0.966667	12	100352931	102731549	no_hmar
1912	12	101838233	101838529	AluSg_dup1352_12:101838233-101838529	-	297	12	101870683	101880546	+	2	ENSG00000166211	-32155	0.967742	12	100352931	102731549	no_hmar
1913	12	102051688	102051927	AluY_dup4054_12:102051688-102051927	+	240	12	101988849	102079457	+	0	ENSG00000196091	0	0.975	12	100352931	102731549	no_hmar
1914	12	102471824	102472119	AluSq_dup639_12:102471824-102472119	+	296	12	102468135	102512296	-	301	ENSG00000075188	0	1	12	100352931	102731549	no_hmar
1915	12	103671388	103671693	AluY_dup4093_12:103671388-103671693	-	306	12	103667661	103872204	-	0	ENSG00000179088	0	0.716184	12	102798628	103789206	hmar
1916	12	104027179	104027477	AluSx1_dup3408_12:104027179-104027477	+	299	12	103981255	104160111	+	17	ENSG00000136011	0	0.1875	12	103793239	108204064	no_hmar
1917	12	104722253	104722563	AluY_dup4149_12:104722253-104722563	+	311	12	104609581	104742196	+	4568	ENSG00000198431	0	0.8125	12	103793239	108204064	no_hmar
1918	12	104999138	104999381	AluYk4_dup72_12:104999138-104999381	+	244	12	104851190	105151578	+	116	ENSG00000171310	0	0.777778	12	103793239	108204064	no_hmar
1919	12	105156723	105156879	AluJr_dup2587_12:105156723-105156879	-	157	12	104851190	105151578	+	116	ENSG00000171310	5146	0.886244	12	103793239	108204064	no_hmar
1920	12	105271495	105271790	AluSx3_dup999_12:105271495-105271790	+	296	12	105198933	105322305	-	114	ENSG00000136052	0	0.982738	12	103793239	108204064	no_hmar
1921	12	105609537	105609820	AluY_dup4174_12:105609537-105609820	+	284	12	105568095	105629790	-	324	ENSG00000136044	0	0.980392	12	103793239	108204064	no_hmar
1922	12	105777652	105777952	AluY_dup4180_12:105777652-105777952	+	301	12	105724670	105789482	+	368	ENSG00000235162	0	0.89237	12	103793239	108204064	no_hmar
1923	12	106145040	106145348	AluSp_dup1818_12:106145040-106145348	+	309	12	106460583	106532431	-	131	ENSG00000074590	315236	0.941177	12	103793239	108204064	no_hmar
1924	12	106618854	106619142	AluJb_dup5292_12:106618854-106619142	+	289	12	106632805	106647906	-	503	ENSG00000136026	13664	0.533333	12	103793239	108204064	no_hmar
1925	12	106639367	106639672	AluSx_dup4677_12:106639367-106639672	-	306	12	106632805	106647906	-	503	ENSG00000136026	0	0.889787	12	103793239	108204064	no_hmar
1926	12	106680770	106681063	AluSx1_dup3502_12:106680770-106681063	+	294	12	106704854	106740305	+	100	ENSG00000166046	23792	0.75	12	103793239	108204064	no_hmar
1927	12	106912446	106912744	AluY_dup4204_12:106912446-106912744	-	299	12	106889941	107168676	-	5	ENSG00000257545	0	0.925926	12	103793239	108204064	no_hmar
1928	12	107616369	107616650	AluSz_dup3335_12:107616369-107616650	-	282	12	107712718	108051492	+	144	ENSG00000151136	-96069	0.815443	12	103793239	108204064	no_hmar
1929	12	107963989	107964291	AluSx3_dup1029_12:107963989-107964291	-	303	12	107712718	108051492	+	144	ENSG00000151136	0	0.222222	12	103793239	108204064	no_hmar
1930	12	109135933	109136202	AluSx_dup4777_12:109135933-109136202	-	270	12	109041182	109096725	-	1242	ENSG00000110880	39209	0.975362	12	108868951	113049335	no_hmar
1931	12	109854827	109854986	AluSx3_dup1053_12:109854827-109854986	+	160	12	109826524	109884984	+	2	ENSG00000174527	0	0.978261	12	108868951	113049335	no_hmar
1932	12	109916304	109916596	AluSx1_dup3643_12:109916304-109916596	+	293	12	109889403	109915067	-	225	ENSG00000110906	-1238	0.46	12	108868951	113049335	no_hmar
1933	12	110285815	110286100	AluY_dup4300_12:110285815-110286100	-	286	12	110290363	110318179	-	152	ENSG00000139433	-4264	0.75	12	108868951	113049335	no_hmar
1934	12	110367102	110367429	AluSp_dup1878_12:110367102-110367429	+	328	12	110370786	110434029	-	501	ENSG00000139436	3358	0.977833	12	108868951	113049335	no_hmar
1935	12	110629694	110629990	AluSz_dup3527_12:110629694-110629990	+	297	12	110565186	110656028	+	218	ENSG00000122970	0	0.5	12	108868951	113049335	no_hmar
1936	12	110826604	110826916	AluY_dup4348_12:110826604-110826916	+	313	12	110811952	110841534	-	502	ENSG00000196510	0	1	12	108868951	113049335	no_hmar
1937	12	110865471	110865761	AluSg_dup1503_12:110865471-110865761	-	291	12	110872963	110888065	-	778	ENSG00000111229	-7203	0	12	108868951	113049335	no_hmar
1938	12	111977270	111977582	AluY_dup4427_12:111977270-111977582	+	313	12	111890540	112037318	-	1782	ENSG00000204842	0	0.638806	12	108868951	113049335	no_hmar
1939	12	112028699	112028992	AluY_dup4434_12:112028699-112028992	-	294	12	111890540	112037318	-	1782	ENSG00000204842	0	0.5	12	108868951	113049335	no_hmar
1940	12	112058940	112059242	AluSx_dup5175_12:112058940-112059242	-	303	12	111890540	112037318	-	1782	ENSG00000204842	21623	0.916906	12	108868951	113049335	no_hmar
1941	12	112069758	112070054	AluY_dup4444_12:112069758-112070054	+	297	12	112082006	112123596	-	412	ENSG00000089234	11953	0.8	12	108868951	113049335	no_hmar
1942	12	112483014	112483312	AluSc8_dup765_12:112483014-112483312	+	299	12	112467338	112546577	-	1240	ENSG00000111300	0	1	12	108868951	113049335	no_hmar
1943	12	112540512	112540791	AluSx3_dup1121_12:112540512-112540791	-	280	12	112467338	112546577	-	1240	ENSG00000111300	0	1	12	108868951	113049335	no_hmar
1944	12	112593107	112593403	AluY_dup4503_12:112593107-112593403	-	297	12	112568327	112590592	+	353	ENSG00000135148	2516	0.981182	12	108868951	113049335	no_hmar
1945	12	112855503	112855762	AluJb_dup6037_12:112855503-112855762	-	260	12	112856916	112942565	+	3449	ENSG00000179295	-1155	0	12	108868951	113049335	no_hmar
1946	12	113117259	113117530	AluSz_dup3806_12:113117259-113117530	-	272	12	113266124	113334582	+	4	ENSG00000089169	-148595	0.810884	12	113054043	113499598	hmar
1947	12	113604224	113604540	AluJb_dup6125_12:113604224-113604540	+	317	12	113596685	113623256	-	1573	ENSG00000123064	0	0.988095	12	113519058	118848494	no_hmar
1948	12	113622360	113622638	AluJr_dup3082_12:113622360-113622638	+	279	12	113596685	113623256	-	1573	ENSG00000123064	0	0.017612	12	113519058	118848494	no_hmar
1949	12	113643413	113643733	AluYb8_dup104_12:113643413-113643733	+	321	12	113633383	113645971	-	63	ENSG00000166578	0	0.881629	12	113519058	118848494	no_hmar
1950	12	113795447	113795745	AluSx3_dup1145_12:113795447-113795745	-	299	12	113796406	113826428	+	402	ENSG00000151176	-662	0.779166	12	113519058	118848494	no_hmar
1951	12	113801335	113801639	AluY_dup4558_12:113801335-113801639	-	305	12	113796406	113826428	+	402	ENSG00000151176	0	0	12	113519058	118848494	no_hmar
1952	12	114237778	114238049	AluSp_dup2026_12:114237778-114238049	-	272	12	114261032	114404032	-	655	ENSG00000122965	-22984	0.9	12	113519058	118848494	no_hmar
1953	12	114423869	114424153	AluJo_dup2863_12:114423869-114424153	+	285	12	114261032	114404032	-	655	ENSG00000122965	-19838	0.333333	12	113519058	118848494	no_hmar
1954	12	114970385	114970677	AluJb_dup6228_12:114970385-114970677	+	293	12	114793340	114841703	-	2	ENSG00000089225	-128683	0.610422	12	113519058	118848494	no_hmar
1955	12	115507189	115507457	AluJr_dup3193_12:115507189-115507457	-	269	12	115800959	115802104	+	0	ENSG00000257726	-293503	0.729167	12	113519058	118848494	no_hmar
1956	12	115635314	115635615	AluSz6_dup1981_12:115635314-115635615	+	302	12	115800959	115802104	+	0	ENSG00000257726	165345	0.416667	12	113519058	118848494	no_hmar
1957	12	116498101	116498407	AluSx1_dup4126_12:116498101-116498407	+	307	12	116399074	116714936	-	5722	ENSG00000123066	0	0.933333	12	113519058	118848494	no_hmar
1958	12	116510256	116510486	AluSx_dup5535_12:116510256-116510486	-	231	12	116399074	116714936	-	5722	ENSG00000123066	0	0.955914	12	113519058	118848494	no_hmar
1959	12	116873514	116873794	AluSx_dup5560_12:116873514-116873794	+	281	12	117013748	117014122	+	53	ENSG00000171471	139955	0.944444	12	113519058	118848494	no_hmar
1960	12	117662079	117662389	AluY_dup4680_12:117662079-117662389	-	311	12	117653117	117768874	-	5	ENSG00000089250	0	0.957265	12	113519058	118848494	no_hmar
1961	12	118080965	118081266	AluSx1_dup4251_12:118080965-118081266	+	302	12	117905007	118406060	-	297	ENSG00000171435	0	1	12	113519058	118848494	no_hmar
1962	12	118125903	118126192	AluSx1_dup4252_12:118125903-118126192	+	290	12	117905007	118406060	-	297	ENSG00000171435	0	0.925926	12	113519058	118848494	no_hmar
1963	12	118331710	118332014	AluY_dup4703_12:118331710-118332014	-	305	12	117905007	118406060	-	297	ENSG00000171435	0	0.941667	12	113519058	118848494	no_hmar
1964	12	118555194	118555491	AluSx1_dup4298_12:118555194-118555491	+	298	12	118504447	118541476	-	203	ENSG00000176834	-13719	0.952778	12	113519058	118848494	no_hmar
1965	12	118569565	118569875	AluSx1_dup4301_12:118569565-118569875	-	311	12	118574015	118582605	+	792	ENSG00000089220	-4141	0.936937	12	113519058	118848494	no_hmar
1966	12	120034293	120034597	AluSx1_dup4384_12:120034293-120034597	-	305	12	120031654	120078507	+	0	ENSG00000224982	0	0.779865	12	119533689	120034389	hmar
1967	12	120106951	120107064	AluJo_dup3108_12:120106951-120107064	-	114	12	120106050	120118127	+	87	ENSG00000111725	0	0.966666	12	120049891	123283551	no_hmar
1968	12	120434755	120435049	AluY_dup4815_12:120434755-120435049	-	295	12	120427673	120530962	+	179	ENSG00000135127	0	0.955862	12	120049891	123283551	no_hmar
1969	12	120535682	120535987	AluY_dup4824_12:120535682-120535987	-	306	12	120534222	120554454	-	618	ENSG00000111737	0	0.982539	12	120049891	123283551	no_hmar
1970	12	120736749	120737070	AluY_dup4851_12:120736749-120737070	+	322	12	120741365	120750836	+	8	ENSG00000089163	4296	0.661905	12	120049891	123283551	no_hmar
1971	12	121021964	121022243	AluSx1_dup4497_12:121021964-121022243	-	280	12	121017124	121019165	-	167	ENSG00000167272	2800	0.387614	12	120049891	123283551	no_hmar
1972	12	121085364	121085684	AluSx1_dup4511_12:121085364-121085684	-	321	12	121078489	121104700	+	4	ENSG00000157782	0	0.666667	12	120049891	123283551	no_hmar
1973	12	121219365	121219679	AluY_dup4908_12:121219365-121219679	-	315	12	121202805	121341670	-	171	ENSG00000157837	0	0.666667	12	120049891	123283551	no_hmar
1974	12	121344675	121344967	AluSz_dup4381_12:121344675-121344967	-	293	12	121202805	121341670	-	171	ENSG00000157837	3006	0.533333	12	120049891	123283551	no_hmar
1975	12	121360736	121361026	AluY_dup4923_12:121360736-121361026	-	291	12	121202805	121341670	-	171	ENSG00000157837	19067	0.965984	12	120049891	123283551	no_hmar
1976	12	121419862	121420175	AluSx_dup6049_12:121419862-121420175	-	314	12	121416429	121438992	+	3	ENSG00000135100	0	0.969697	12	120049891	123283551	no_hmar
1977	12	121461080	121461392	AluSq2_dup2269_12:121461080-121461392	-	313	12	121458367	121476774	-	33	ENSG00000135114	0	0.666667	12	120049891	123283551	no_hmar
1978	12	121475299	121475598	AluSc8_dup840_12:121475299-121475598	+	300	12	121458367	121476774	-	33	ENSG00000135114	0	0.8125	12	120049891	123283551	no_hmar
1979	12	121485837	121486128	AluSx_dup6052_12:121485837-121486128	-	292	12	121458367	121476774	-	33	ENSG00000135114	9064	0.988095	12	120049891	123283551	no_hmar
1980	12	121648301	121648597	AluJr_dup3502_12:121648301-121648597	+	297	12	121647968	121671350	+	68	ENSG00000135124	0	0.416667	12	120049891	123283551	no_hmar
1981	12	121728628	121728922	AluSz_dup4438_12:121728628-121728922	-	295	12	121678274	121712329	-	246	ENSG00000110931	16300	0.930027	12	120049891	123283551	no_hmar
1982	12	121736375	121736654	AluSz6_dup2184_12:121736375-121736654	+	280	12	121746286	121790143	-	1204	ENSG00000089053	9633	1	12	120049891	123283551	no_hmar
1983	12	121740412	121740715	AluYf5_dup5_12:121740412-121740715	+	304	12	121746286	121790143	-	1204	ENSG00000089053	5572	0.320513	12	120049891	123283551	no_hmar
1984	12	121836881	121837163	AluSq2_dup2288_12:121836881-121837163	+	283	12	121838016	121868294	+	458	ENSG00000170633	854	0.410714	12	120049891	123283551	no_hmar
1985	12	121987933	121988241	AluSx_dup6137_12:121987933-121988241	+	309	12	121867922	122018816	-	522	ENSG00000089094	0	0.964285	12	120049891	123283551	no_hmar
1986	12	121990857	121991158	AluY_dup4976_12:121990857-121991158	+	302	12	121867922	122018816	-	522	ENSG00000089094	0	0.666667	12	120049891	123283551	no_hmar
1987	12	122056307	122056601	AluSz_dup4489_12:122056307-122056601	-	295	12	122064648	122079546	+	85	ENSG00000182500	-8048	0.957143	12	120049891	123283551	no_hmar
1988	12	122083812	122083967	AluSc5_dup300_12:122083812-122083967	+	156	12	122064648	122079546	+	85	ENSG00000182500	-4267	0.666667	12	120049891	123283551	no_hmar
1989	12	122109506	122109803	AluSq4_dup52_12:122109506-122109803	+	298	12	122090643	122107389	-	6	ENSG00000139714	-2118	0.967742	12	120049891	123283551	no_hmar
1990	12	122110088	122110387	AluJr_dup3542_12:122110088-122110387	+	300	12	122090643	122107389	-	6	ENSG00000139714	-2700	0.377778	12	120049891	123283551	no_hmar
1991	12	122117606	122117892	AluSz_dup4503_12:122117606-122117892	-	287	12	122090643	122107389	-	6	ENSG00000139714	10218	0.888889	12	120049891	123283551	no_hmar
1992	12	122446360	122446660	AluY_dup5049_12:122446360-122446660	-	301	12	122359212	122441667	+	47	ENSG00000158023	4694	0.932044	12	120049891	123283551	no_hmar
1993	12	122485148	122485454	AluY_dup5057_12:122485148-122485454	+	307	12	122459998	122497066	+	101	ENSG00000110987	0	0.444445	12	120049891	123283551	no_hmar
1994	12	122491990	122492292	AluY_dup5058_12:122491990-122492292	-	303	12	122459998	122497066	+	101	ENSG00000110987	0	0.868522	12	120049891	123283551	no_hmar
1995	12	122607078	122607393	AluY_dup5065_12:122607078-122607393	-	316	12	122516760	122626864	+	1110	ENSG00000175727	0	0.992	12	120049891	123283551	no_hmar
1996	12	122663645	122663951	AluJr_dup3591_12:122663645-122663951	-	307	12	122667692	122687986	+	0	ENSG00000158113	-3742	0.963938	12	120049891	123283551	no_hmar
1997	12	122667094	122667271	AluSx_dup6309_12:122667094-122667271	+	178	12	122667692	122687986	+	0	ENSG00000158113	422	0.968062	12	120049891	123283551	no_hmar
1998	12	122689314	122689589	AluJr_dup3593_12:122689314-122689589	+	276	12	122689166	122691932	+	34	ENSG00000176383	0	0.940079	12	120049891	123283551	no_hmar
1999	12	122709786	122709956	AluJb_dup7042_12:122709786-122709956	+	171	12	122692931	122710561	-	484	ENSG00000184047	0	0.167634	12	120049891	123283551	no_hmar
[truncated: 7,340 more rows]
